# Supplementary material for: Combined PD-L1/TGFβ blockade allows expansion and differentiation of stem cell-like CD8 T cells in immune excluded tumors
Source: Springer Nature journal article supplement (doi:10.1038/s41467-023-40398-4), 2023-08-05
Supplement: MOESM1 [file 41467_2023_40398_MOESM1_ESM.pdf]

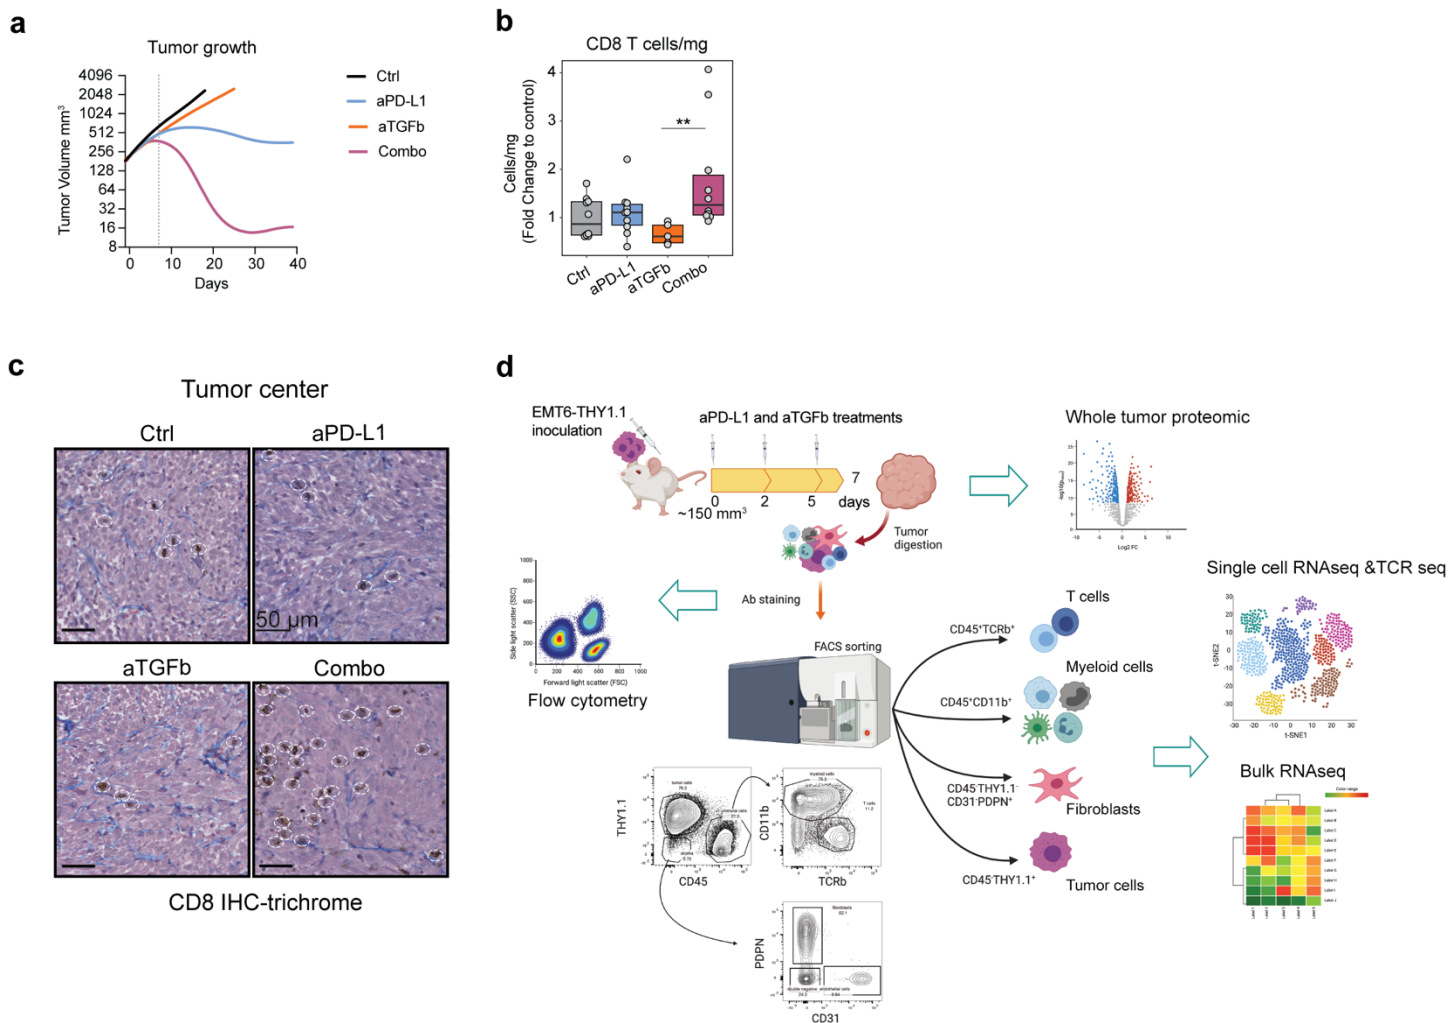

### Supplementary Figure 1. EMT6 tumor growth curves and experimental layout.

(a) Group fit curves of EMT6 tumor volume when treated with anti-PD-L1 and anti-TGF $\beta$  alone or in combination from figure 1a. Representative experiment (10 animals, see Supplementary figure 1 for individual animal curves). Dashed line indicates day 7 after initiation of treatment.

(b) Tumor CD8 T cell quantification by flow cytometry (n=10 per group of treatment; data from two independent experiments; data are expressed as FC compared to the median of the control group across groups (x-axis)). Adjusted P value \*\* = 0.00855 Dunn's test (two-sided) with Benjamini-Hochberg multiple testing correction unless differently specified. Whiskers represent the minimum and maximum (unless points extend 1.5 \* IQR from the hinge, then shown as individual points), the box represents the interquartile range, and the center line represents the median.

(c) Representative CD8 IHC staining of tumor center that is quantified in figure 1d. White dashed circles highlight CD8 T cells.

(d) Experimental layout. EMT6-THY1.1 tumor cells were inoculated in the mammary fat pad, treatments started when tumor size reached ~150mm<sup>3</sup>. At 7 days after initiation of treatment tumors were collected and analyzed by whole tumor proteomic, flow cytometry, or sc-RNA/TCRseq and bulk RNAseq on sorted populations (T cells, Myeloid cells, Fibroblasts and Tumor cells). Created with BioRender.com.

Source data are provided as a Source Data file. Ctrl = control (anti-GP120), aPD-L1 = anti-PD-L1, aTGF $\beta$  = anti-TGF $\beta$ , combo = combination anti-PD-L1+ anti-TGF $\beta$ .

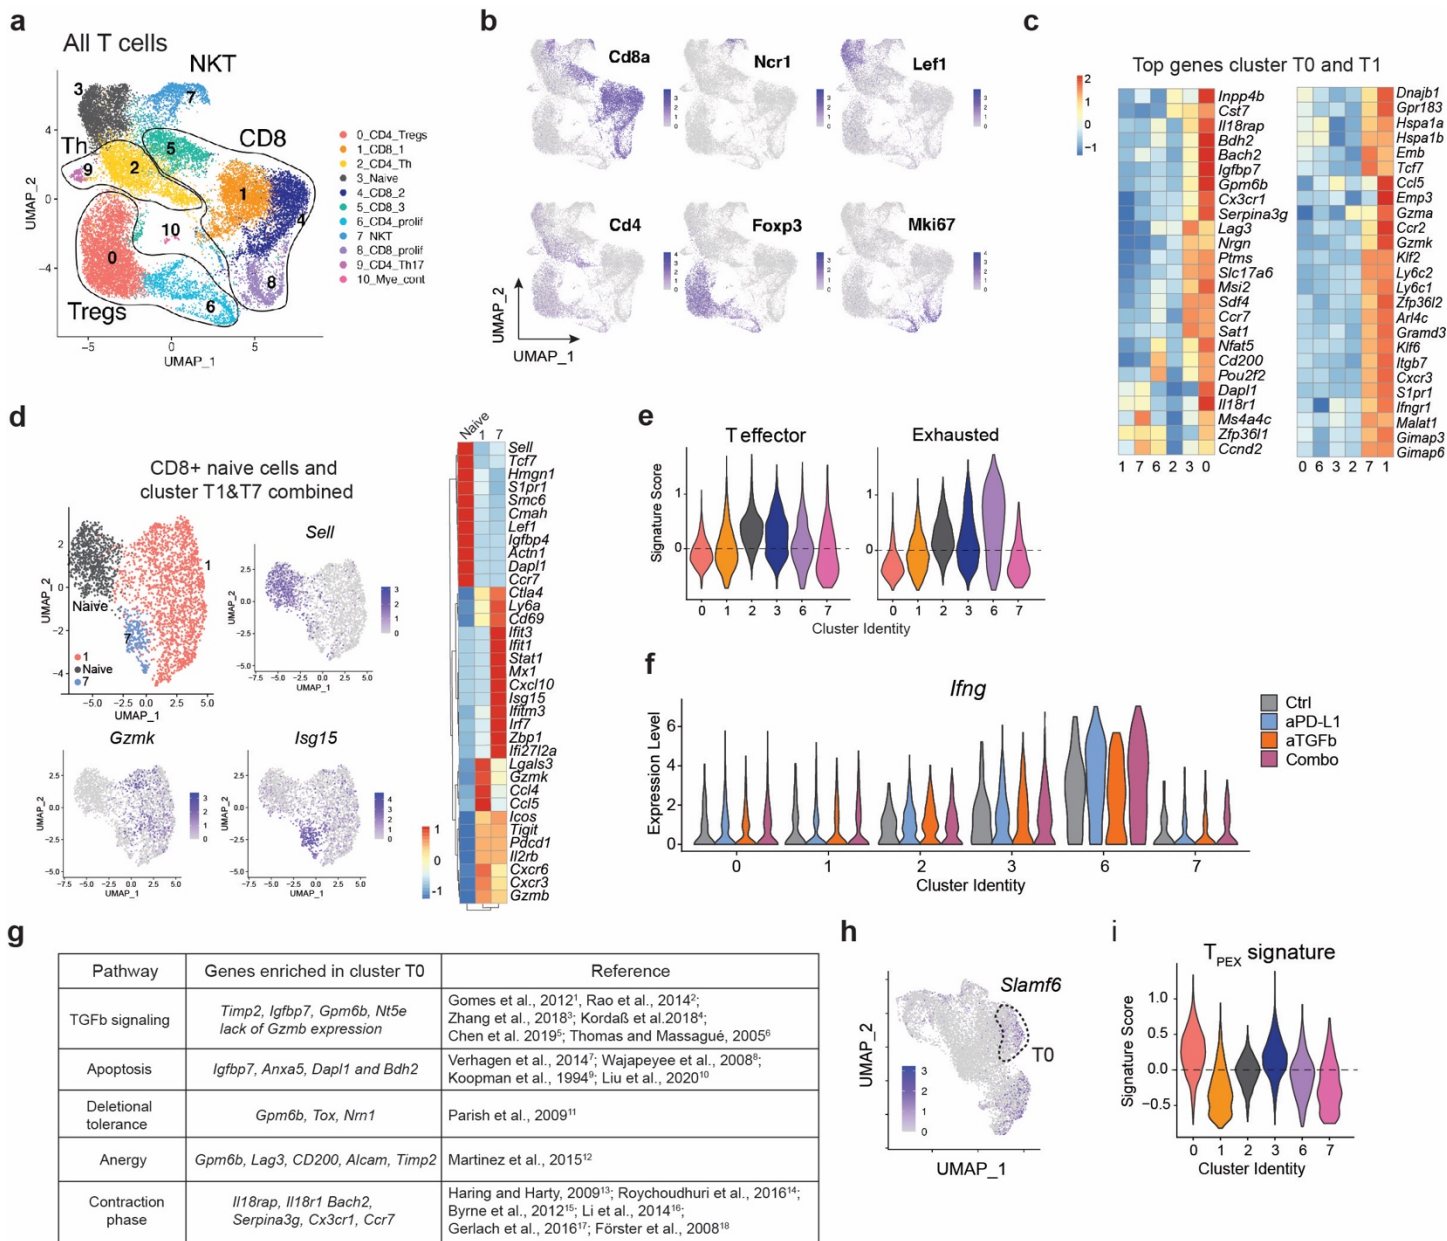

## Supplementary Figure 2. CD8 T cell scRNA-seq filtering and downstream analysis.

- (a) UMAP of 25,063 T cells (dots) colored by cluster.
- (b) Expression of selected genes visualized on UMAP for identification of main T cells types.
- (c) Relative average expression of the top 25 genes expressed by CD8 T cell clusters T0 and T1 from figure 2a.
- (d) (Left) UMAP of CD8 naive T cell together with cells from clusters T1 and T7 from figure 2a. (Right) relative average gene expression of selected genes.
- (e) T effector and exhausted signature enrichment scores in clusters from figure 2a.
- (f) Expression level of *Ifng* per cluster from figure 2a separated by treatment.
- (g) Classification of genes enriched in cluster T0 with references.
- (h) UMAP as in figure 2a, here colored by *Slamf6* expression.
- (i) T<sub>PEX</sub> gene signature enrichment in CD8 T cells clusters.

**a** Flow Cytometry gating strategy Figure 2

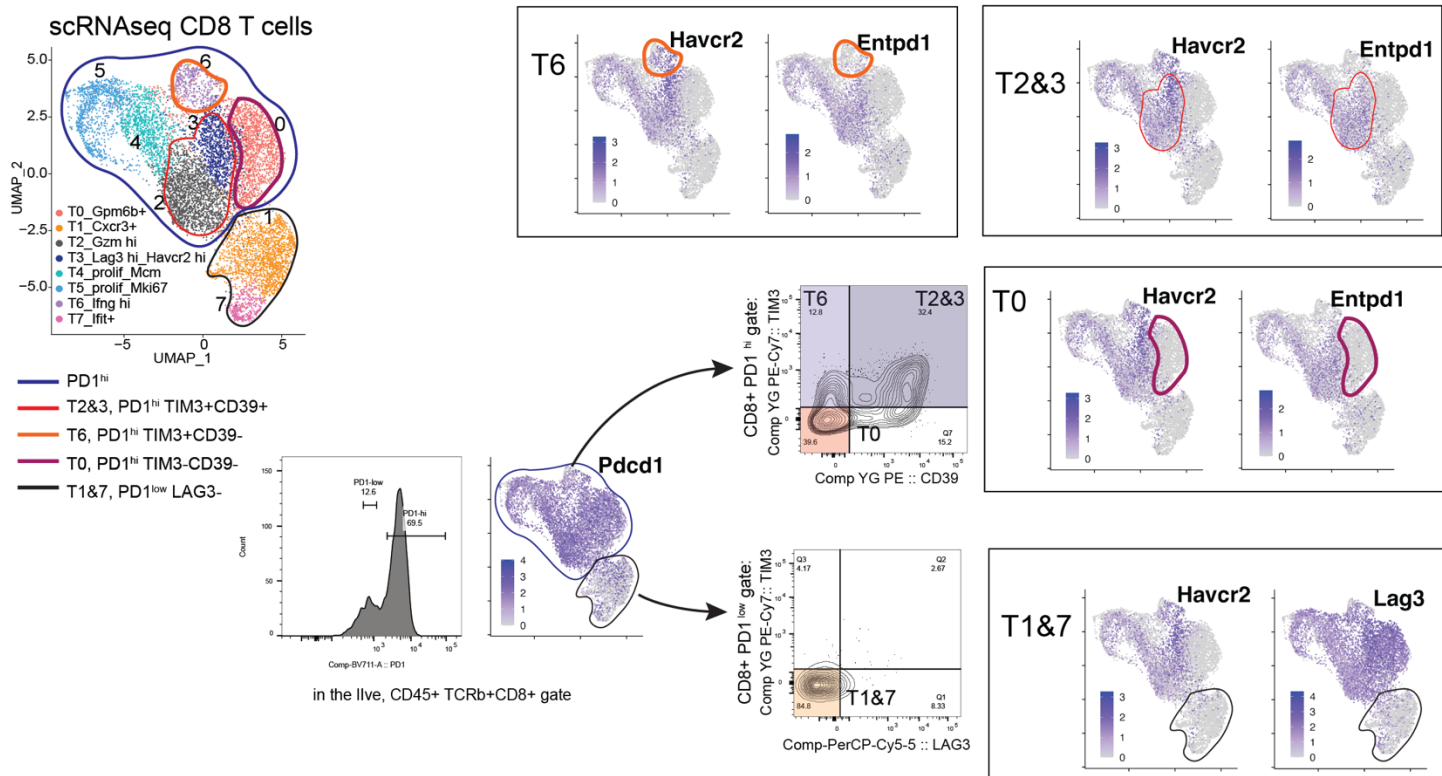

**b** Flow Cytometry gating strategy Figure 3

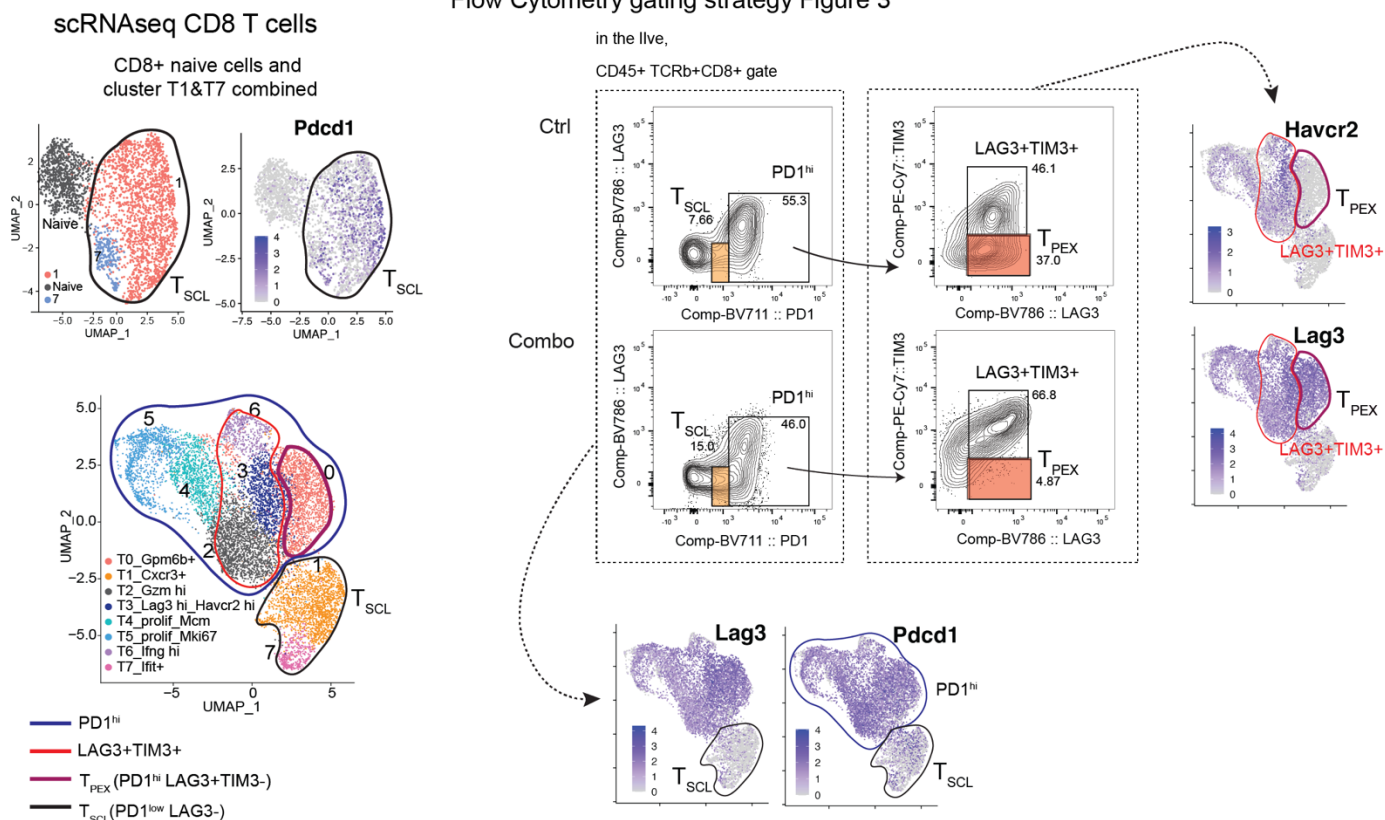

### Supplementary Figure 3. Development of flow cytometry gating strategy.

(a) Gating strategy used to validate scRNAseq clusters by flow cytometry in figure 2. Within the live, CD45+TCRb+CD8+ gate two populations are distinguished: PD1hi and PD1low. Within the PD1hi population 3 different CD8 T cell populations are identified: T0, TIM3-CD39-; T6, TIM3+CD39-; and T2&3, TIM3+CD39+. The PD1low population is also LAG3- (T1&7).

(b) The top left panel shows the difference in PD1 expression between T<sub>SCL</sub> and naive CD8 T cells by scRNAseq (naive cells are PD1 negative). Here, the gating strategy used to quantify T<sub>PEX</sub> and T<sub>SCL</sub> by flow cytometry in figure 3 and Supplementary figure 4, as well example plots from control and combo treated groups are shown. Within the live, CD45+TCRb+CD8+ gate two populations are gated: PD1hi and PD1lowLAG3- (T<sub>SCL</sub>). Within the PD1hi population two different CD8 T cells populations are identified: T<sub>PEX</sub> (LAG3+TIM3-) and TIM3+LAG3+ cells. The percentages of T<sub>PEX</sub> and T<sub>SCL</sub> in Supplementary figure 4 were calculated within the CD8+ T cells excluding naive (PD1 negative) cells.

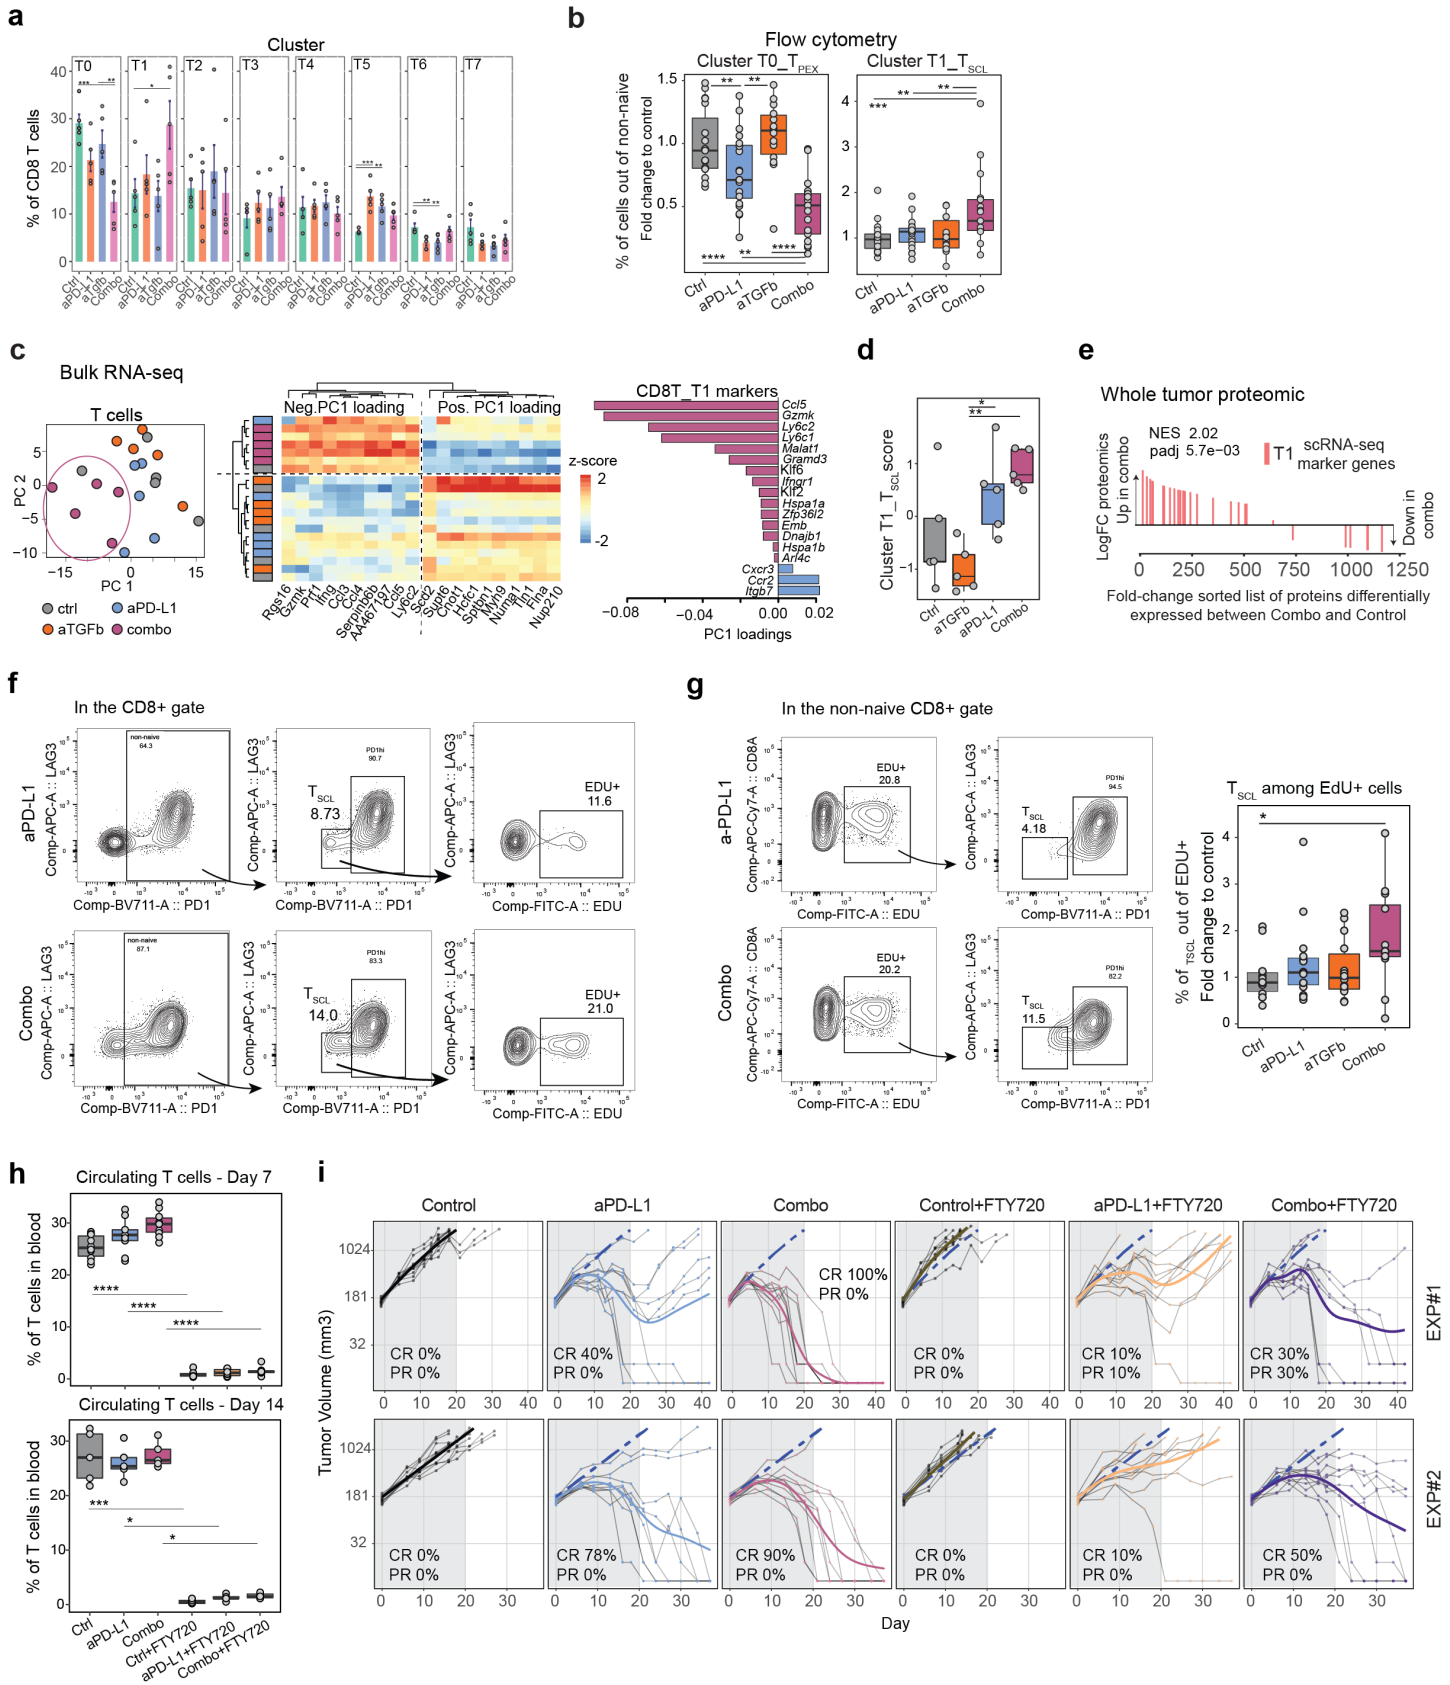

#### Supplementary Figure 4. Changes in CD8 T cell phenotypes induced by anti-PD-L1 and anti-TGF $\beta$ treatment.

- (a) Mean frequency of CD8 T cell clusters from figure 2a by treatment group (n=5 per group). Error bars represent SEM.
- (b) Flow cytometry quantification of CD8 T<sub>SCL</sub> (PD1lowLAG3-) and TPEX cells (PD1hiLAG3+TIM3-) (percentage of cell in the non-naive CD8 T cells population, fold-change over average of the control group: y-axis; groups: x-axis; data from three independent experiments, ctrl n=19, aPD-L1 n=20, aTGF $\beta$  n=14, combo n=17).
- (c) Bulk RNA-seq analysis on sorted T cells (n=5 per group). (Left) PCA analysis of T cells by treatment. (Middle) Heatmap of top 10 genes positively and negatively loading PC1. (Right) PC1 loadings of indicated T<sub>SCL</sub> marker genes.
- (d) Cluster T1 signature score in bulk RNAseq performed on sorted T cells by treatment (n=5 per group).
- (e) Proteomic analysis on whole tumor (n=10 per group). Gene set enrichment analysis on proteins rank ordered by fold-change between combination and control highlighting proteins encoding T<sub>SCL</sub> marker genes.
- (f) Gating strategy used for the flow cytometric analysis of EdU+ T<sub>SCL</sub> presented in figure 3g. Representative plots from anti-PD-L1 and combo treated groups.
- (g) (Left) Gating strategy used for the analysis presented in the right panel. (Right) Flow cytometry quantification of T<sub>SCL</sub> in the EdU+ CD8 T cells (percentage of non-naive CD8 T cells, fold-change over average of the control group: y-axis; groups: x-axis; data from two independent experiments, ctrl n=14, aPD-L1 n=15, aTGF $\beta$  n=14, combo n=12).
- (h) Percentage of T cells circulating in blood at days 7 and 14 after initiation of FTY720 treatment (% of total CD45+: y-axis; groups: x-axis; two independent experiments, n = 10 for all groups for day 7, n = 5 for all groups for day 14). Here only significant comparisons between a treatment and their respective counterpart with FTY720 are shown.
- (i) EMT6 tumor volume showing the individual animal curves relative to figure 3h. Grey shades indicate treatment duration. Two independent experiments are shown.

Source data are provided as a Source Data file. Ctrl = control (anti-GP120), aPD-L1 = anti-PD-L1, aTGF $\beta$  = anti-TGF $\beta$ , combo = combination anti-PD-L1+ anti-TGF $\beta$ ; Adj P values \* $<0.1$ , \*\* $<0.05$ , \*\*\* $<0.01$ , \*\*\*\* $<0.001$  Dunn's test (two-sided) with Benjamini-Hochberg multiple testing correction unless differently specified. Adjusted P values for **a**: T0: 0.005517513 (ctrl vs combo), 0.030889647 (aTGF $\beta$  vs combo); T1: 0.08364055 (ctrl vs combo); T5: 0.003744252 (aPD-L1 vs ctrl), 0.016331945 (aTGF $\beta$  vs ctrl); T6: 0.03266389 (aPD-L1 vs ctrl), 0.02644396 (aTGF $\beta$  vs ctrl). **b**: T<sub>PEX</sub>: 0.0000275 (ctrl vs combo), 0.0212 (aPD-L1 vs combo), 0.000014 (aTGF $\beta$  vs combo), 0.0433 (ctrl vs aPD-L1), 0.0205 (aTGF $\beta$  vs aPD-L1); T<sub>SCL</sub>: 0.00291 (ctrl vs combo), 0.0374 (aPD-L1 vs combo), 0.0207 (aTGF $\beta$  vs combo). Adjusted P values for **d**: 0.02337900 (aTGF $\beta$  vs combo), 0.08523774 (aTGF $\beta$  vs aPD-L1). Adjusted P values for **g**: 0.0751 (ctrl vs combo). Adjusted P values for **h**, day 7: 0.000634 (ctrl vs ctrl+FTY720), 0.000623 (aPD-L1 vs aPD-L1+FTY720), 0.000193 (combo vs combo+FTY720); day 14: 0.00245 (ctrl vs ctrl+FTY720), 0.0529 (aPD-L1 vs aPD-L1+FTY720), 0.0617 (combo vs combo+FTY720). For **b**, **d**, **g**, **h** whiskers represent the minimum and maximum (unless points extend 1.5 \* IQR from the hinge, then shown as individual points), the box represents the interquartile range, and the center line represents the median.

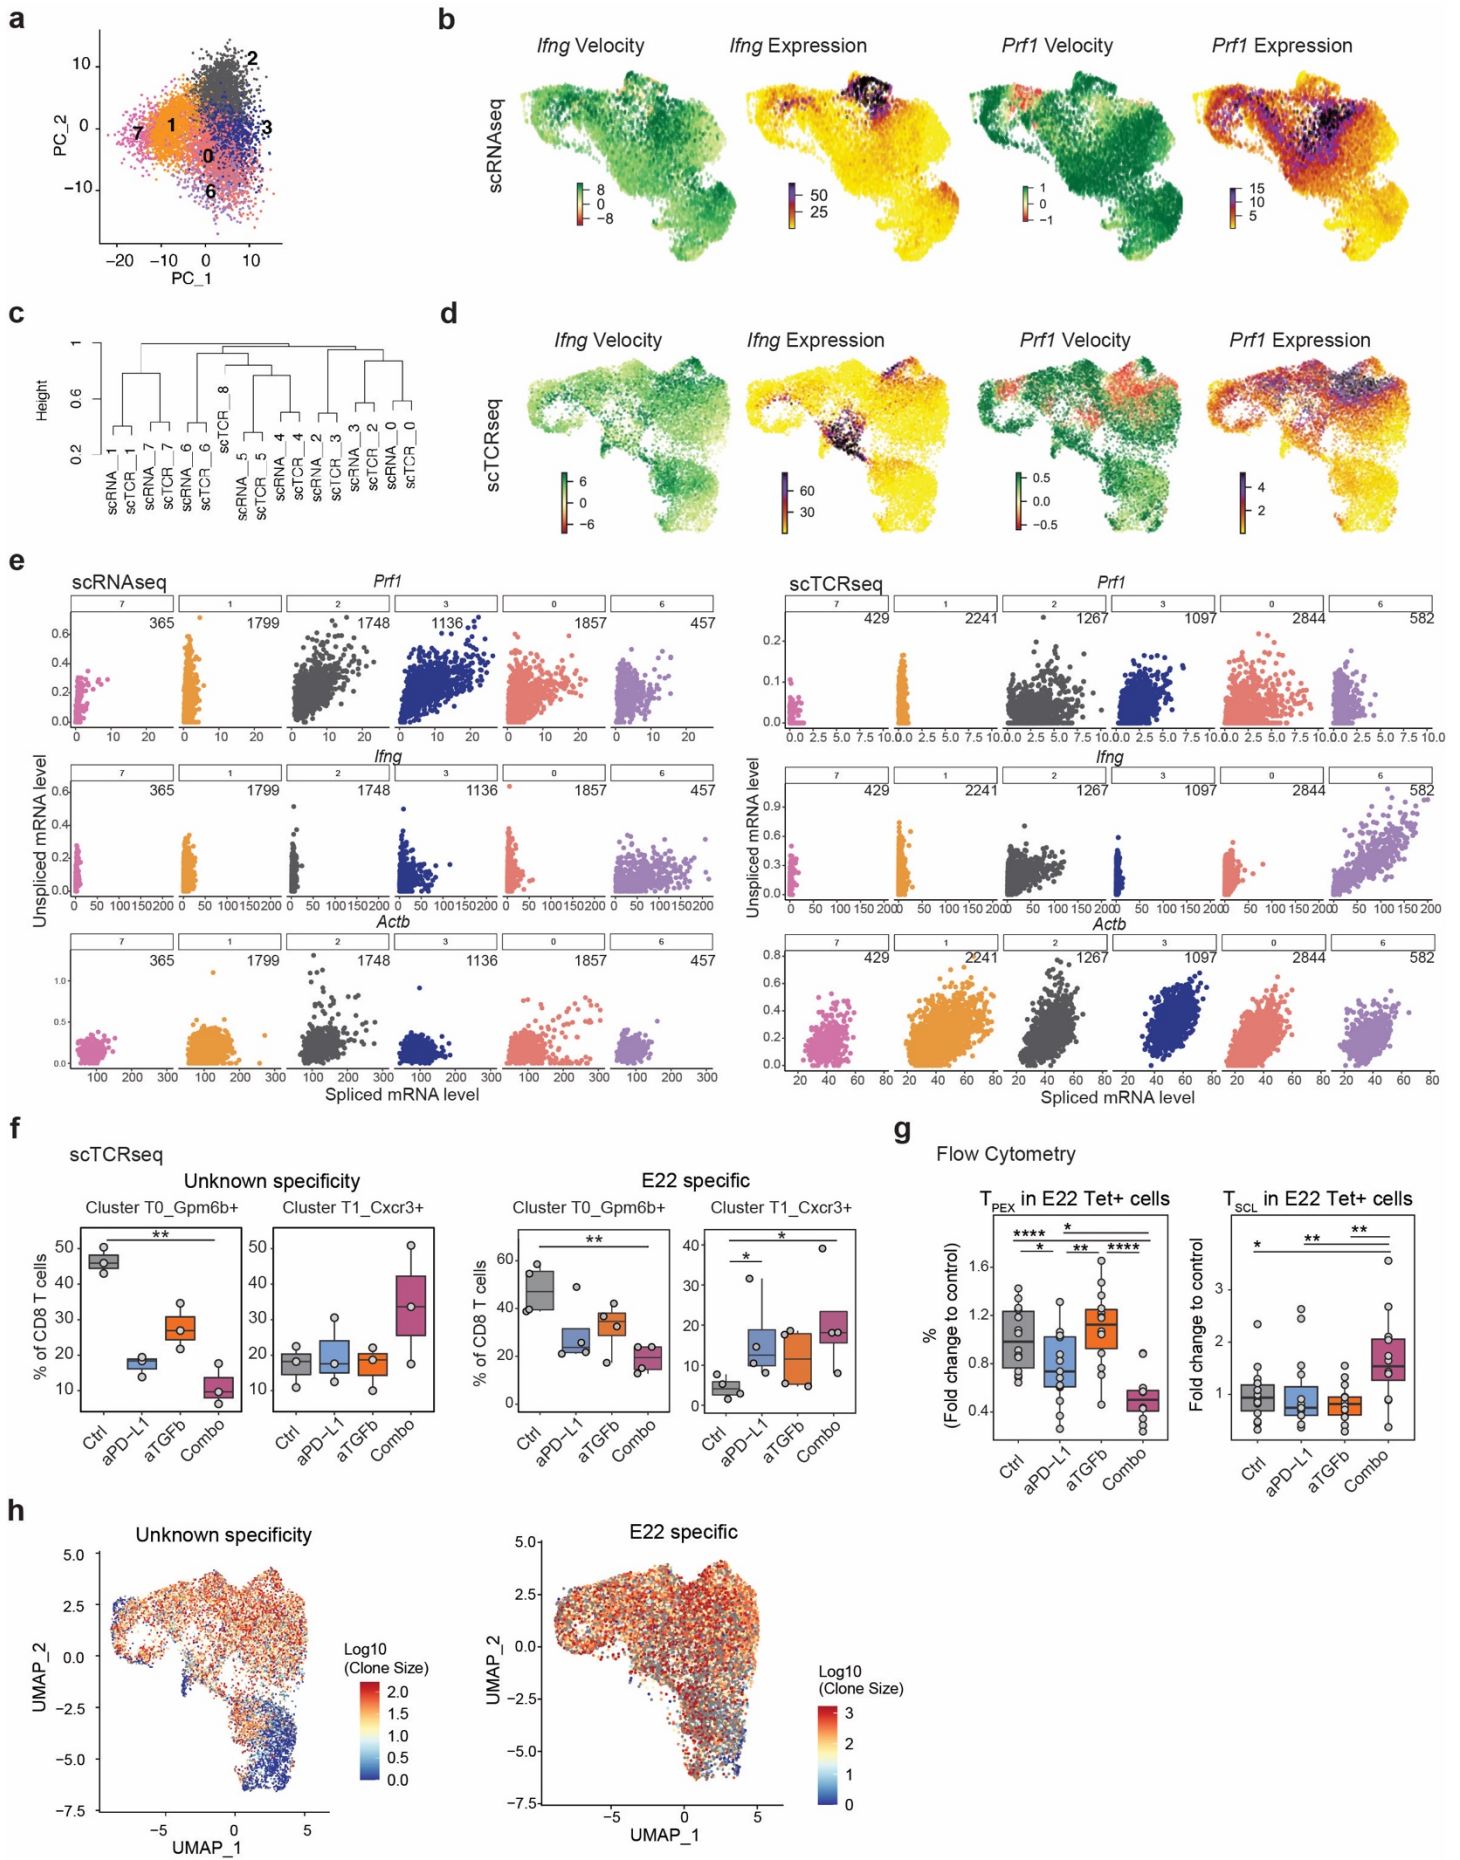

### Supplementary Figure 5. scRNA/TCR-seq analysis.

(a) Cells from figure 2a, here in PCA space.

(b) Visualization of *Ifng* and *Prf1* velocity (left) and expression (right) on the UMAP for scRNA-seq dataset as in figure 2a.

(c) Dendrogram of CD8 T cell clusters in two single-cell datasets: scRNA and unsorted scTCR-seq from figures 2a and 4d (left), respectively.

(d) Visualization of *Ifng* and *Prf1* velocity (left) and expression (right) on the UMAP for the unsorted scTCR-seq dataset as in figure 4d (left).

(e) Quantification of spliced vs unspliced *Ifng*, *Prf1*, and *Actb* (as a reference gene) transcripts using first order moments. Left is for the scRNA-seq dataset, right is for the unsorted scTCR-seq dataset. Number of cells in each plot are in the upper right corner.

(f) ScTCR-seq cluster T0 and T1 frequency quantification in unknown specificity (left; n=3 animals per treatment group) and E22 specific cells (right; n=4 animals per treatment group).

(g) Flow cytometry quantification of CD8 T<sub>SCL</sub> (PD1<sup>low</sup>LAG3<sup>-</sup>) and T<sub>PEX</sub> cells (PD1<sup>hi</sup>LAG3<sup>+</sup>TIM3<sup>-</sup>) within the E22 specific CD8 T cells (percentage of cells, fold-change over average of the control group: y-axis; groups: x-axis; data from two independent experiments, Ctrl n=14; aPD-L1 n=15; aTGFb n=14; Combo n=12).

(h) UMAP of CD8 T cells colored by clone size for unknown specificity (left) and E22 specific cells (right).

Source data are provided as a Source Data file. Ctrl = control (anti-GP120), aPD-L1 = anti-PD-L1, aTGFb = anti-TGFβ, combo = combination anti-PD-L1+ anti-TGFβ; Adj P values \*<0.1, \*\*<0.05, \*\*\*<0.01, \*\*\*\*<0.001 Dunn's test (two-sided) with Benjamini-Hochberg multiple testing correction unless differently specified. Adjusted P values for **f**: Unsorted Cluster T0\_Gpm6b+ 0.0194 (Ctrl vs Combo). E22 Cluster T0\_Gpm6b+ 0.0286 (Ctrl vs Combo); E22 Cluster T1\_Cxcr3+ 0.0560 (Ctrl vs Combo), 0.0938 (Ctrl vs aPD-L1). Adjusted P values for **g**: T<sub>PEX</sub> 0.000527 (ctrl vs combo), 0.0772 (aPD-L1 vs combo), 0.000092 (aTGFb vs combo), 0.0626 (ctrl vs aPD-L1), 0.0216 (aTGFb vs aPD-L1); T<sub>SCL</sub> 0.0568 (ctrl vs combo), 0.0209 (aPD-L1 vs combo), 0.0254 (aTGFb vs combo). For **f and g** whiskers represent the minimum and maximum (unless points extend 1.5 \* IQR from the hinge, then shown as individual points), the box represents the interquartile range, and the center line represents the median.

**a**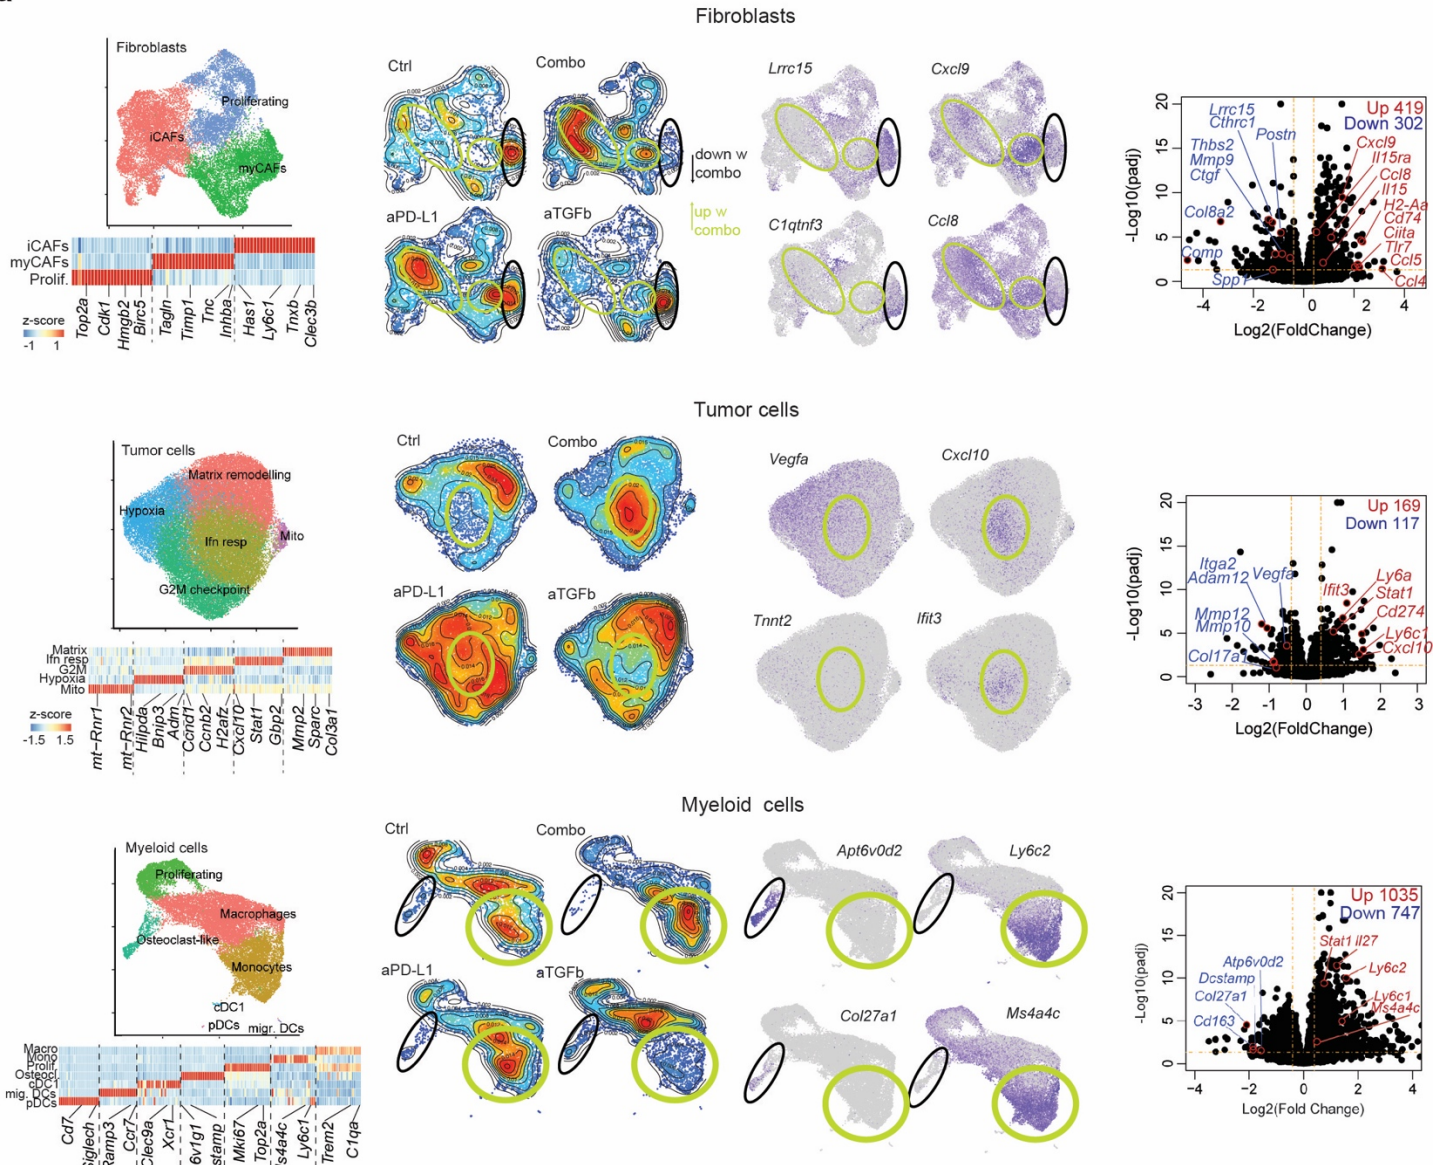**b**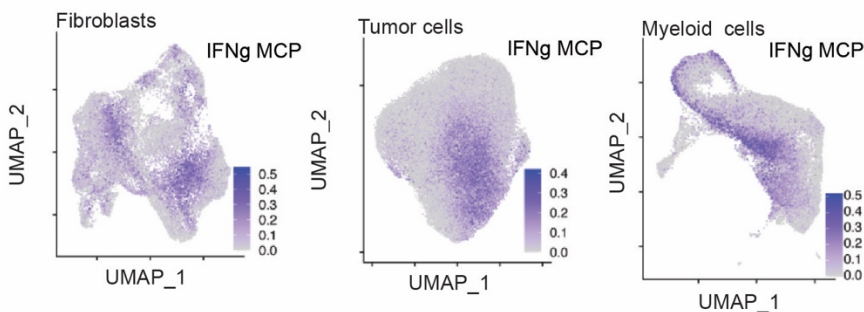**c**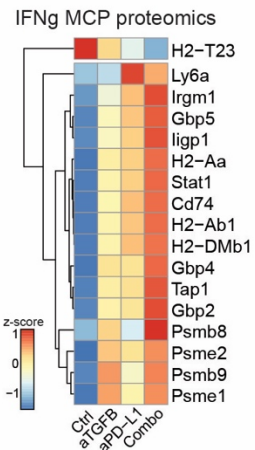

**Supplementary Figure 6. scRNA-seq analysis of myeloid, tumor cells, and CAFs and proteomic validation.**

(a) (1st column) UMAP of fibroblasts, tumor cells and myeloid cells (dots) colored by cluster. Markers for individual clusters are given by heatmaps on the bottom. (2nd column) The density of cells from each condition is indicated by color in the middle (blue: sparse; red: dense). (3rd column) Expression of indicated marker genes on the UMAP from the left. (4<sup>th</sup> column) Pseudo-bulk differential expression analysis comparing cells from the control to the anti-PD-L1 anti-TGF $\beta$  combination (n=5 per group). Yellow lines indicate significance thresholds: fold change,  $\pm$  0.4 and adjusted p-value < 0.05 (DEseq2), DEG: differentially expressed genes.

(b) UMAP as in (a) of fibroblast (left), tumor (middle), and myeloid cells (right), colored by IFN $\gamma$  MCP program activity.

(c) Proteomic analysis on whole tumor samples across conditions (n=10 per group). Heatmap represents z-scores of the relative abundance compared to control for proteins encoded by genes in the IFN $\gamma$  MCP program.

Ctrl = control (anti-GP120), aPD-L1 = anti-PD-L1, aTGF $\beta$  = anti-TGF $\beta$ , combo = combination anti-PD-L1+ anti-TGF $\beta$ .

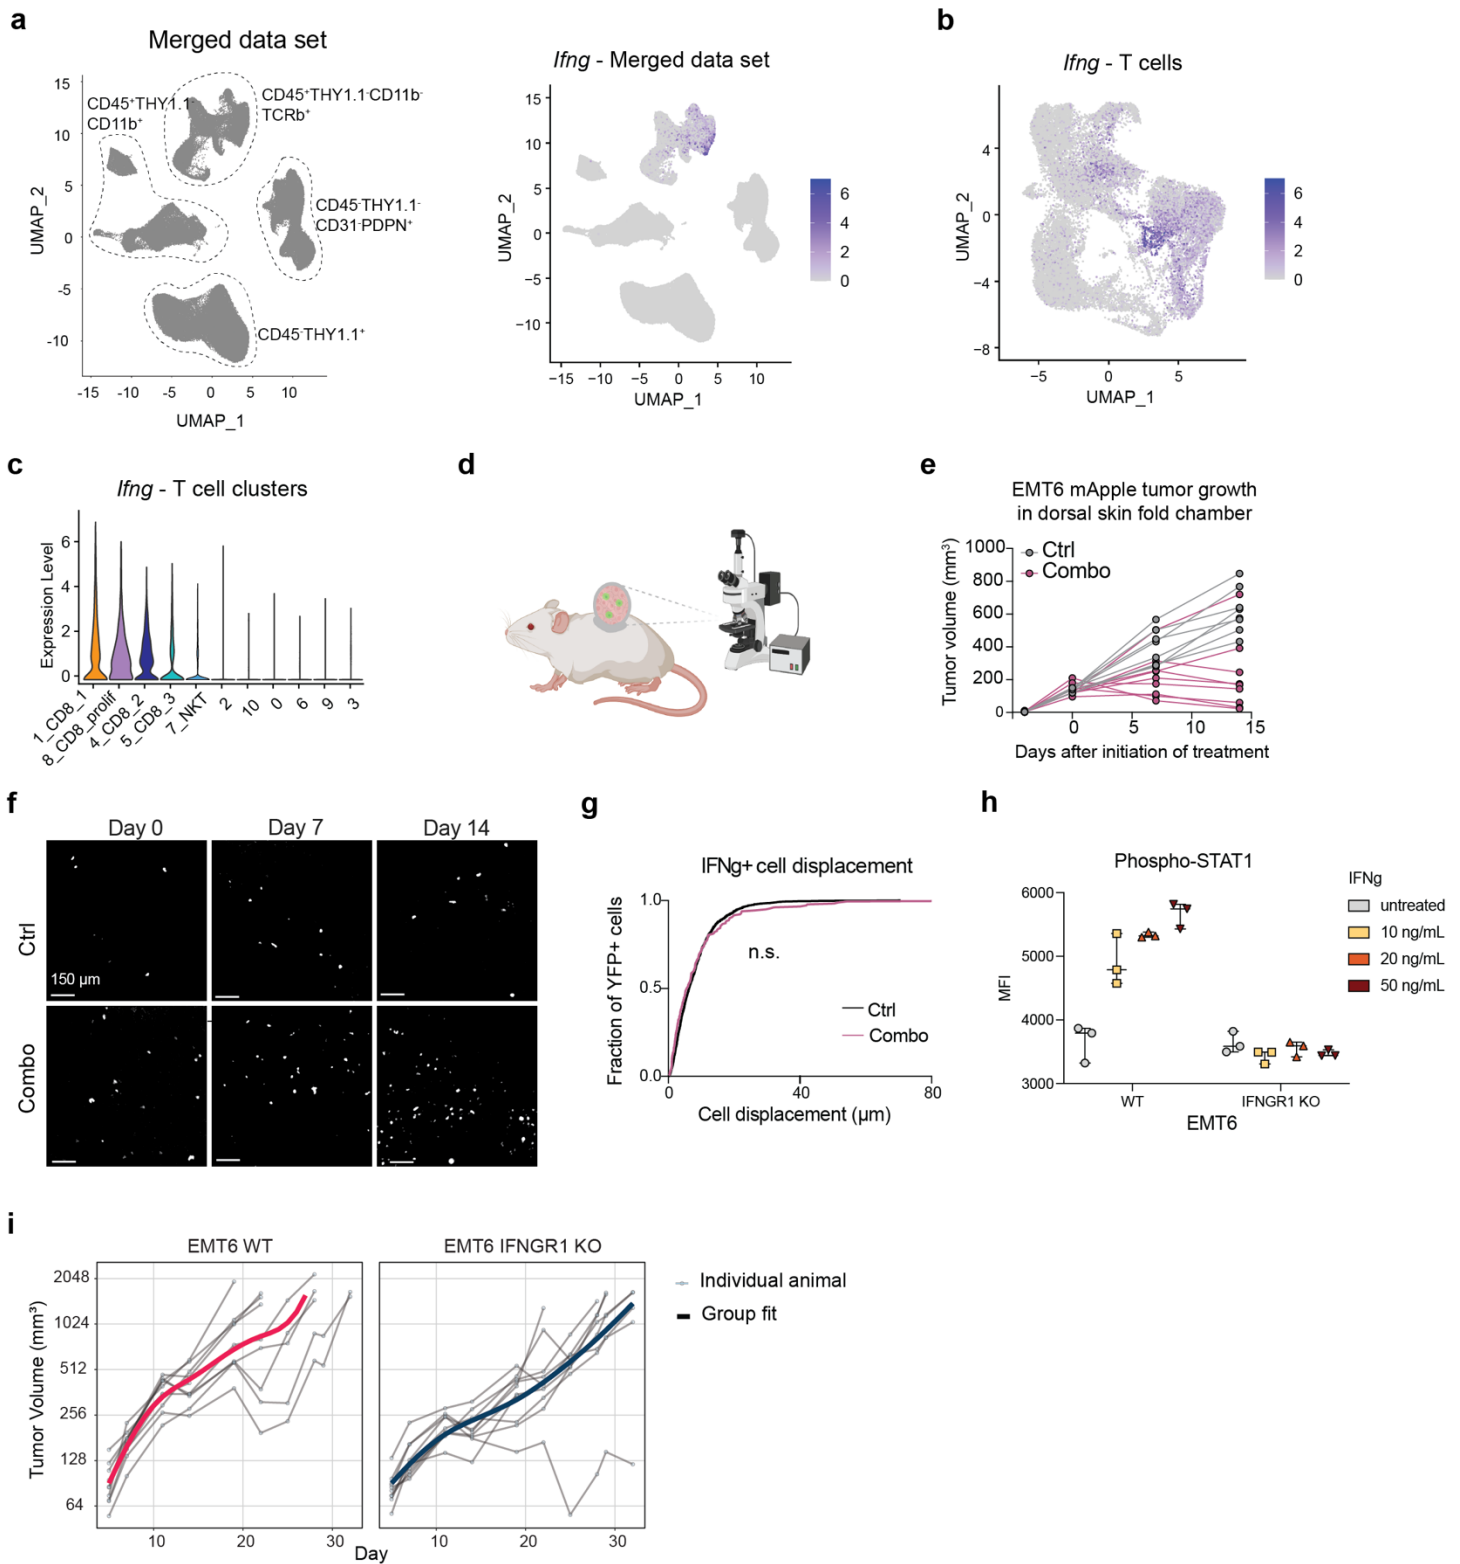

**Supplementary Figure 7. Identification of CD8 T cells as the main IFN $\gamma$  source in the TME and *in vivo* imaging.**

(a) (Left) UMAP of merged data set with cells coming from all the sorted populations from the tumor. (Right) *Ifng* expression on merged data set.

(b) *Ifng* expression in T cell UMAP as in Supplementary figure 2a.

(c) Violin plot of *Ifng* expression in T cell clusters from Supplementary figure 2a.

- (d)** Dorsal skin fold chamber (DSFC) *in vivo* imaging set up. EMT6 mAPPLE tumor cells were implanted in the DSFC mounted on the back of YFP IFN $\gamma$  reporter mice. Video recordings were made using 2-photon microscopy (created with biorender.com).
- (e)** Tumor growth of EMT6 mAPPLE in DSFC (data from one experiment, n=8 control group, n=9 combination group).
- (f)** Representative images of the IFN $\gamma$ -YFP channel of one control and one combo treated tumors.
- (g)** IFN $\gamma$ -YFP+ cell displacement at day 7-9 after initiation of treatment (Control: n = 179 cells from 8 mice; Combination: n = 2,310 cells from 7 mice (non-responders excluded); P value <0.0001, two-tailed Kolmogorov-Smirnov test).
- (h)** *In vitro* validation of the IFNGR1 KO EMT6 cells. WT and KO cells were treated for 30 minutes with IFN $\gamma$  at the indicated concentrations. Cells were then harvested and STAT1 phosphorylation was assessed by flow cytometry (MFI = mean fluorescence intensity; n=3 technical replicates; middle line is median, error bars represent min to max values).
- (i)** *In vivo* tumor growth analysis of IFNGR1 KO EMT6 cells compared to WT. Individual animal curves (grey lines) and group fit curves (thick solid lines) are provided, n=10.

Source data are provided as a Source Data file. Ctrl = control (anti-GP120), combo = combination anti-PD-L1+ anti-TGF $\beta$ .

Supplementary Table 1: ScRNA-seq cell numbers.

| Cell type                           | all           | ctrl         | aPD-L1        | aTGFB        | combo        |
|-------------------------------------|---------------|--------------|---------------|--------------|--------------|
| T cells                             | 25063         | 2463         | 6805          | 7687         | 8108         |
| CD11b+ cells                        | 26867         | 5469         | 6967          | 7880         | 6551         |
| Fibroblasts                         | 37773         | 7026         | 11471         | 7959         | 11317        |
| Tumor cells                         | 45024         | 7128         | 14416         | 12415        | 11065        |
|                                     |               |              |               |              |              |
| <b>Total cells in study</b>         | <b>119185</b> | <b>19141</b> | <b>35883</b>  | <b>32190</b> | <b>31971</b> |
|                                     |               |              |               |              |              |
| <b>Sub populations:</b>             | <b>all</b>    | <b>ctrl</b>  | <b>aPD-L1</b> | <b>aTGFB</b> | <b>combo</b> |
| Myeloid cells, neutrophils excluded | 21601         | 4467         | 5786          | 6494         | 4854         |
| CD8 T cells                         | 9525          | 690          | 3087          | 2765         | 2983         |
| Tregs                               | 7190          | 659          | 2148          | 2199         | 2184         |
| NKT                                 | 1390          | 174          | 408           | 352          | 456          |
| CD4 T cells                         | 3352          | 357          | 943           | 971          | 1081         |
| Fibroblasts, filtered               | 22231         | 4081         | 7695          | 4208         | 6247         |

Supplementary Table 2: Gene signatures.

| Signature name   | Genes                                                      | Source                                                                                                                                                                                                                                 |
|------------------|------------------------------------------------------------|----------------------------------------------------------------------------------------------------------------------------------------------------------------------------------------------------------------------------------------|
| T <sub>SCM</sub> | Tcf7 Sell Il2rb Cxcr3 Ly6a Bcl2 Klf2                       | Derived from<br>Zhang, Y et al. (2005) <sup>19</sup><br>Gattinoni, L. et al. (2009) <sup>20</sup><br>Graef, P. et al. (2014) <sup>21</sup><br>Crompton, J. G. et al. (2016) <sup>22</sup><br>Gattinoni, L., et al (2017) <sup>23</sup> |
| T effector       | Cd8a Gzma Gzmb Prf1 Cxcl9 Cxcl10<br>Tbx21                  | Mariathasan, S. et al. (2018) <sup>24</sup>                                                                                                                                                                                            |
| Exhausted        | Gzmb Sytl2 Ccl3 Ccl4 Cd244 Chn2<br>Cish Cxcr6 FasL Plekhf1 | Texhausted_list_6 from:<br>Beltra, J.-C. et al (2020) <sup>25</sup>                                                                                                                                                                    |
| Cytotoxic        | FasL Gzmf Gzmc Gzmb Gzmd Prf1<br>Ifng Tnf Ccl4 Ccl3 Ccl5   | Halle, S., et al. (2017) <sup>26</sup><br>Allen, F. et al (2017) <sup>27</sup><br>Bhat, P. et al (2017) <sup>28</sup><br>Lieberman, J. (2003) <sup>29</sup>                                                                            |
| T <sub>PEX</sub> | Pdcd1 Tcf7 Lag3 Gpm6b Slamf6                               | Utzschneider, D. T. et al. (2016) <sup>30</sup><br>Hudson, W. H. et al. (2019) <sup>31</sup><br>Im, S. J et al. (2020) <sup>32</sup><br>Siddiqui, I. et al. (2019) <sup>33</sup><br>Andreatta, M. et al. (2021) <sup>34</sup>          |

Supplementary Table 3: T cells cluster frequency statistical analysis.

| Cluster | Comparison   | Z        | P.unadj  | P.adj    |
|---------|--------------|----------|----------|----------|
| 0       | Combo-Ctrl   | -3.31404 | 0.00092  | 0.005518 |
| 0       | Combo-aPD-L1 | -1.71047 | 0.087179 | 0.174357 |
| 0       | Ctrl-aPD-L1  | 1.603568 | 0.108809 | 0.163214 |
| 0       | Combo-aTGFb  | -2.56571 | 0.010297 | 0.03089  |
| 0       | Ctrl-aTGFb   | 0.748332 | 0.45426  | 0.45426  |
| 0       | aPD-L1-aTGFb | -0.85524 | 0.392421 | 0.470905 |
| 1       | Combo-Ctrl   | 2.458803 | 0.01394  | 0.083641 |
| 1       | Combo-aPD-L1 | 1.603567 | 0.108809 | 0.217619 |
| 1       | Ctrl-aPD-L1  | -0.85524 | 0.392421 | 0.588631 |
| 1       | Combo-aTGFb  | 2.031185 | 0.042236 | 0.126709 |
| 1       | Ctrl-aTGFb   | -0.42762 | 0.668929 | 0.668929 |
| 1       | aPD-L1-aTGFb | 0.427618 | 0.668929 | 0.802715 |
| 2       | Combo-Ctrl   | -0.64143 | 0.521245 | 1        |
| 2       | Combo-aPD-L1 | -0.37417 | 0.708281 | 1        |
| 2       | Ctrl-aPD-L1  | 0.267261 | 0.789268 | 1        |
| 2       | Combo-aTGFb  | -0.58797 | 0.556549 | 1        |
| 2       | Ctrl-aTGFb   | 0.053452 | 0.957372 | 0.957372 |
| 2       | aPD-L1-aTGFb | -0.21381 | 0.830696 | 0.996835 |
| 3       | Combo-Ctrl   | 1.389759 | 0.164602 | 0.987613 |
| 3       | Combo-aPD-L1 | 0.748332 | 0.45426  | 0.908521 |
| 3       | Ctrl-aPD-L1  | -0.64143 | 0.521245 | 0.781868 |
| 3       | Combo-aTGFb  | 1.17595  | 0.239615 | 0.718845 |
| 3       | Ctrl-aTGFb   | -0.21381 | 0.830696 | 0.830696 |
| 3       | aPD-L1-aTGFb | 0.427618 | 0.668929 | 0.802715 |
| 4       | Combo-Ctrl   | -0.16042 | 0.872553 | 0.872553 |
| 4       | Combo-aPD-L1 | -0.64167 | 0.521089 | 1        |
| 4       | Ctrl-aPD-L1  | -0.48125 | 0.630338 | 0.945507 |
| 4       | Combo-aTGFb  | -1.01597 | 0.309641 | 1        |
| 4       | Ctrl-aTGFb   | -0.85556 | 0.392243 | 1        |
| 4       | aPD-L1-aTGFb | -0.37431 | 0.708176 | 0.849812 |
| 5       | Combo-Ctrl   | 1.817376 | 0.069159 | 0.138319 |
| 5       | Combo-aPD-L1 | -1.60357 | 0.108809 | 0.163214 |
| 5       | Ctrl-aPD-L1  | -3.42094 | 0.000624 | 0.003744 |
| 5       | Combo-aTGFb  | -0.96214 | 0.335979 | 0.403175 |
| 5       | Ctrl-aTGFb   | -2.77952 | 0.005444 | 0.016332 |
| 5       | aPD-L1-aTGFb | 0.641427 | 0.521245 | 0.521245 |
| 6       | Combo-Ctrl   | -0.90869 | 0.363515 | 0.436218 |
| 6       | Combo-aPD-L1 | 1.870829 | 0.061369 | 0.122738 |
| 6       | Ctrl-aPD-L1  | 2.779517 | 0.005444 | 0.032664 |
| 6       | Combo-aTGFb  | 1.710472 | 0.087179 | 0.130768 |
| 6       | Ctrl-aTGFb   | 2.61916  | 0.008815 | 0.026444 |
| 6       | aPD-L1-aTGFb | -0.16036 | 0.8726   | 0.8726   |
| 7       | Combo-Ctrl   | -1.38976 | 0.164602 | 0.329205 |
| 7       | Combo-aPD-L1 | 0.587975 | 0.556549 | 0.667859 |
| 7       | Ctrl-aPD-L1  | 1.977733 | 0.047959 | 0.143876 |
| 7       | Combo-aTGFb  | 0.694879 | 0.487131 | 0.730697 |
| 7       | Ctrl-aTGFb   | 2.084638 | 0.037102 | 0.222613 |
| 7       | aPD-L1-aTGFb | 0.106905 | 0.914865 | 0.914865 |

**Supplementary Table 4: Antibody list.**

| <b>Antibody</b>                                 | <b>Origin</b>            | <b>Identifier</b> |
|-------------------------------------------------|--------------------------|-------------------|
| CD11b BUV395, clone M1/70                       | BD Bioscience            | Cat # 563553      |
| CD11b BV650, clone M1/70                        | Biolegend                | Cat # 101259      |
| CD11b BV785, clone M1/70                        | Biolegend                | Cat # 101243      |
| CD19 BV650, clone 6D5                           | Biolegend                | Cat # 115541      |
| CD31 BUV737, MEC13.3                            | BD Bioscience            | Cat # 612802      |
| CD39 PE, clone Duha59                           | Biolegend                | Cat # 143803      |
| CD44 FITC, clone IM7                            | Biolegend                | Cat # 103006      |
| CD45 BV605, clone 30-F11                        | BD Bioscience            | Cat # 563053      |
| CD45 BUV395, clone 30-F11                       | BD Bioscience            | Cat # 564279      |
| CD45 PE-Cy7, clone 30-F11                       | Biolegend                | Cat # 103114      |
| CD8 APC-Cy7, clone 53-6.7                       | Biolegend                | Cat # 100714      |
| CD4 BV711, clone RM4-5                          | Biolegend                | Cat # 100557      |
| CD90.2 BV785, clone 30-H12                      | Biolegend                | Cat # 105331      |
| F4-80 BV711, clone BM8                          | Biolegend                | Cat # 123147      |
| Granzyme B FITC, clone NGZB                     | Thermo Fisher Scientific | Cat # 11-8898-82  |
| IFNg PE-Cy7, clone XMG1.2                       | Biolegend                | Cat # 505825      |
| LAG3 BV785, clone C9B7W                         | Biolegend                | Cat # 125219      |
| LAG3 Percp-Cy5.5, clone C9B7W                   | Biolegend                | Cat # 125211      |
| LAG3 APC, clone C9B7W                           | Thermo Fisher Scientific | Cat # 17-2231-82  |
| LY6C Percp-Cy5.5, clone HK1.4                   | Biolegend                | Cat # 128012      |
| LY6G APC-Cy7, clone 1A8                         | Biolegend                | Cat # 127624      |
| NK1.1 BV650, clone PK136                        | Biolegend                | Cat # 108736      |
| PD-1 BV711, clone 29F.1A12                      | Biolegend                | Cat # 135231      |
| PDPN APC-Cy7, clone 8.1.1                       | Biolegend                | Cat # 127418      |
| PDPN PE, clone 8.1.1                            | Biolegend                | Cat #127408       |
| TCF1 AF647, clone C63D9                         | Cell Signaling           | Cat # 6709S       |
| TCRb APC, clone H57-597                         | Thermo Fisher Scientific | Cat # 17-5961-82  |
| TCRb PE, clone H57-597                          | Biolegend                | Cat # 109208      |
| THY1.1 AF488, clone OX-7                        | Biolegend                | Cat # 202506      |
| TIM3 PE-Cy7, clone RMT3-23                      | Biolegend                | Cat # 119716      |
| PE E22 tetramer (H-2Kd, peptide seq: RYAQAFTLL) | MBL International        | Cat # TBCM3-KDI-1 |
| PE LCMV tetramer (H-2Kd)                        | MBL International        | Cat # TS-M514-1   |
| P-STAT1 (Tyr701) AF488, rabbit mAb clone 58D6   | Cell Signaling           | Cat # 9174S       |
| TotalSeq™-B0301                                 | Biolegend                | Cat #155831       |
| TotalSeq™-B0302                                 | Biolegend                | Cat #155833       |
| TotalSeq™-B0303                                 | Biolegend                | Cat #155835       |
| TotalSeq™-B0304                                 | Biolegend                | Cat #155837       |
| TotalSeq™-B0305                                 | Biolegend                | Cat #155839       |
| TotalSeq™-C0301                                 | Biolegend                | Cat #155861       |
| TotalSeq™-C0302                                 | Biolegend                | Cat #155863       |
| TotalSeq™-C0303                                 | Biolegend                | Cat #155865       |
| TotalSeq™-C0304                                 | Biolegend                | Cat #155867       |
| TotalSeq™-C0305                                 | Biolegend                | Cat #155869       |

|                                              |               |              |
|----------------------------------------------|---------------|--------------|
| TotalSeq™-C0306                              | Biolegend     | Cat #155871  |
| Fc block, clone 2.4G2                        | BD Bioscience | Cat #553142  |
| biotinylated goat anti-hamster IgG           | Vectorlabs    | BA-9100      |
| hamster anti-mouse CD8a, clone 1.21E3.1.3    | Genentech     |              |
| anti-mouse PD-L1, clone 6E11                 | Genentech     |              |
| Anti-TGFb, clones 1D11 and 1D11.V8.13.EG     | Genentech     |              |
| Anti-gp120                                   | Genentech     |              |
| Anti-mouse IFN $\gamma$ , clone Clone XMG1.2 | BioXcell      | Cat # BP0055 |

## Supplementary references

- Gomes, L. R., Terra, L. F., Wailemann, R. A., Labriola, L. & Sogayar, M. C. TGF- $\beta$ 1 modulates the homeostasis between MMPs and MMP inhibitors through p38 MAPK and ERK1/2 in highly invasive breast cancer cells. *Bmc Cancer* 12, 26 (2012).
- Rao, C. *et al.* High Expression of IGFBP7 in Fibroblasts Induced by Colorectal Cancer Cells Is Co-Regulated by TGF- $\beta$  and Wnt Signaling in a Smad2/3-Dvl2/3-Dependent Manner. *Plos One* 9, e85340 (2014).
- Zhang, X. *et al.* Glycoprotein M6B Interacts with T $\beta$ RI to Activate TGF- $\beta$ -Smad2/3 Signaling and Promote Smooth Muscle Cell Differentiation: Glycoprotein M6B Interacts with T $\beta$ RI. *Stem Cells* 37, 190–201 (2018).
- Kordaß, T., Osen, W. & Eichmüller, S. B. Controlling the Immune Suppressor: Transcription Factors and MicroRNAs Regulating CD73/NT5E. *Front Immunol* 9, 813 (2018).
- Chen, S. *et al.* CD73 expression on effector T cells sustained by TGF- $\beta$  facilitates tumor resistance to anti-4-1BB/CD137 therapy. *Nat Commun* 10, 150 (2019).
- Thomas, D. A. & Massagué, J. TGF- $\beta$  directly targets cytotoxic T cell functions during tumor evasion of immune surveillance. *Cancer Cell* 8, 369–380 (2005).
- Verhagen, H. J. *et al.* IGFBP7 induces apoptosis of acute myeloid leukemia cells and synergizes with chemotherapy in suppression of leukemia cell survival. *Cell Death Dis* 5, e1300–e1300 (2014).
- Wajapeyee, N., Serra, R. W., Zhu, X., Mahalingam, M. & Green, M. R. Oncogenic BRAF Induces Senescence and Apoptosis through Pathways Mediated by the Secreted Protein IGFBP7. *Cell* 132, 363–374 (2008).
- Koopman, G. *et al.* Annexin V for flow cytometric detection of phosphatidylserine expression on B cells undergoing apoptosis. *Blood* 84, 1415–1420 (1994).
- Liu, J.-Z. *et al.* BDH2 triggers ROS-induced cell death and autophagy by promoting Nrf2 ubiquitination in gastric cancer. *J Exp Clin Canc Res* 39, 123 (2020).
- Parish, I. A. *et al.* The molecular signature of CD8+ T cells undergoing deletional tolerance. *Blood* 113, 4575–4585 (2009).
- Martinez, G. J. *et al.* The Transcription Factor NFAT Promotes Exhaustion of Activated CD8+ T Cells. *Immunity* 42, 265–278 (2015).
- Haring, J. S. & Harty, J. T. Interleukin-18-related genes are induced during the contraction phase but do not play major roles in regulating the dynamics or function of the T-cell response to *Listeria monocytogenes* infection. *Infect Immun* 77, 1894–903 (2009).
- Roychoudhuri, R. *et al.* BACH2 regulates CD8+ T cell differentiation by controlling access of AP-1 factors to enhancers. *Nat Immunol* 17, 851–860 (2016).
- Byrne, S. M. *et al.* Cathepsin B Controls the Persistence of Memory CD8+ T Lymphocytes. *J Immunol* 189, 1133–1143 (2012).
- Li, L. *et al.* Brief Report: Serpin Spi2A as a Novel Modulator of Hematopoietic Progenitor Cell Formation. *Stem Cells* 32, 2550–2556 (2014).

17. Gerlach, C. *et al.* The Chemokine Receptor CX3CR1 Defines Three Antigen-Experienced CD8 T Cell Subsets with Distinct Roles in Immune Surveillance and Homeostasis. *Immunity* 45, 1270–1284 (2016).
18. Förster, R., Davalos-Misslitz, A. C. & Rot, A. CCR7 and its ligands: balancing immunity and tolerance. *Nat Rev Immunol* 8, 362–371 (2008).
19. Zhang, Y., Joe, G., Hexner, E., Zhu, J. & Emerson, S. G. Host-reactive CD8<sup>+</sup> memory stem cells in graft-versus-host disease. *Nat Med* 11, 1299–1305 (2005).
20. Gattinoni, L. *et al.* Wnt signaling arrests effector T cell differentiation and generates CD8<sup>+</sup> memory stem cells. *Nat Med* 15, 808–813 (2009).
21. Graef, P. *et al.* Serial Transfer of Single-Cell-Derived Immunocompetence Reveals Stemness of CD8<sup>+</sup> Central Memory T Cells. *Immunity* 41, 116–126 (2014).
22. Crompton, J. G. *et al.* Lineage relationship of CD8<sup>+</sup> T cell subsets is revealed by progressive changes in the epigenetic landscape. *Cell Mol Immunol* 13, 502–513 (2016).
23. Gattinoni, L., Speiser, D. E., Lichterfeld, M. & Bonini, C. T memory stem cells in health and disease. *Nat Med* 23, 18–27 (2017).
24. Mariathasan, S. *et al.* TGF $\beta$  attenuates tumour response to PD-L1 blockade by contributing to exclusion of T cells. *Nature* 554, 544–548 (2018).
25. Beltra, J.-C. *et al.* Developmental Relationships of Four Exhausted CD8<sup>+</sup> T Cell Subsets Reveals Underlying Transcriptional and Epigenetic Landscape Control Mechanisms. *Immunity* (2020) doi:10.1016/j.immuni.2020.04.014.
26. Halle, S., Halle, O. & Förster, R. Mechanisms and Dynamics of T Cell-Mediated Cytotoxicity In Vivo. *Trends Immunol* 38, 432–443 (2017).
27. Allen, F. *et al.* CCL3 augments tumor rejection and enhances CD8<sup>+</sup> T cell infiltration through NK and CD103<sup>+</sup> dendritic cell recruitment via IFN $\gamma$ . *Oncoimmunology* 7, 00–00 (2017).
28. Bhat, P., Leggatt, G., Waterhouse, N. & Frazer, I. H. Interferon- $\gamma$  derived from cytotoxic lymphocytes directly enhances their motility and cytotoxicity. *Cell Death Dis* 8, e2836–e2836 (2017).
29. Lieberman, J. The ABCs of granule-mediated cytotoxicity: new weapons in the arsenal. *Nat Rev Immunol* 3, 361–370 (2003).
30. Utzschneider, D. T. *et al.* T Cell Factor 1-Expressing Memory-like CD8<sup>+</sup> T Cells Sustain the Immune Response to Chronic Viral Infections. *Immunity* 45, 415–427 (2016).
31. Hudson, W. H. *et al.* Proliferating Transitory T Cells with an Effector-like Transcriptional Signature Emerge from PD-1<sup>+</sup> Stem-like CD8<sup>+</sup> T Cells during Chronic Infection. *Immunity* 51, 1043-1058.e4 (2019).
32. Im, S. J., Konieczny, B. T., Hudson, W. H., Masopust, D. & Ahmed, R. PD-1<sup>+</sup> stemlike CD8 T cells are resident in lymphoid tissues during persistent LCMV infection. *Proc National Acad Sci* 117, 4292–4299 (2020).
33. Siddiqui, I. *et al.* Intratumoral Tcf1<sup>+</sup>PD-1<sup>+</sup>CD8<sup>+</sup> T Cells with Stem-like Properties Promote Tumor Control in Response to Vaccination and Checkpoint Blockade Immunotherapy. *Immunity* 50, 195-211.e10 (2019).
34. Andreatta, M. *et al.* Interpretation of T cell states from single-cell transcriptomics data using reference atlases. *Nat Commun* 12, 2965 (2021).
