# Supplementary material for: Combined PD-L1/TGFβ blockade allows expansion and differentiation of stem cell-like CD8 T cells in immune excluded tumors
Source: Springer Nature journal article supplement (doi:10.1038/s41467-023-40398-4), 2023-08-05
Supplement: MOESM2 [file 41467_2023_40398_MOESM2_ESM.pdf]

## **Description of Additional Supplementary Files**

**Supplementary Data 1:** T cells cluster markers

**Supplementary Data 2:** Whole tumor proteomic analysis

**Supplementary Data 3:** CD8 T cell pseudo-bulk differential expression analysis

**Supplementary Data 4:** CD8 T cell cluster markers (scTCR seq dataset)

**Supplementary Data 5:** NMF programs

**Supplementary Data 6:** Tumor, Myeloid cells, and Fibroblasts pseudo-bulk differential expression analysis

**Supplementary Data 7:** Tumor, Myeloid cells, and Fibroblasts pathway enrichment analysis
