# Supplementary material for: Combined PD-L1/TGFβ blockade allows expansion and differentiation of stem cell-like CD8 T cells in immune excluded tumors
Source: Nat Commun. 2023 Aug 5;14:4703. doi: 10.1038/s41467-023-40398-4 (PMC10404279; doi:10.1038/s41467-023-40398-4)
Supplement: Supplementary file 3 — Supplementary Data 1 [file 41467_2023_40398_MOESM3_ESM.xlsx]

## Sheet: Cluster_Markers_All_T_cells
	p_val	avg_logFC	pct.1	pct.2	p_val_adj	cluster	gene
Tnfrsf4	5.6082e-204	1.54753	0.939	0.426	1.11609e-199	0	Tnfrsf4
Ikzf2	1.84742e-199	1.49842	0.882	0.279	3.67655e-195	0	Ikzf2
Foxp3	2.33847e-186	1.48507	0.75	0.106	4.65379e-182	0	Foxp3
Tnfrsf18	2.21431e-182	1.20806	0.946	0.683	4.4067e-178	0	Tnfrsf18
Icos	7.70115e-182	1.3106	0.94	0.621	1.53261e-177	0	Icos
Maf	3.68219e-181	1.61573	0.838	0.234	7.32792e-177	0	Maf
Cd2	8.44604e-180	1.03265	0.957	0.817	1.68085e-175	0	Cd2
H2-D1	2.5406e-174	0.58278	1	0.999	5.05604e-170	0	H2-D1
Ifi27l2a	7.9996e-152	1.20305	0.981	0.782	1.592e-147	0	Ifi27l2a
Ccr2	1.61482e-151	1.49947	0.781	0.265	3.21365e-147	0	Ccr2
Ctla4	1.24345e-145	1.3645	0.88	0.494	2.47459e-141	0	Ctla4
Pim1	3.78099e-145	1.20315	0.913	0.53	7.52455e-141	0	Pim1
Arl5a	2.10706e-142	1.34115	0.742	0.296	4.19326e-138	0	Arl5a
Izumo1r	1.50212e-140	1.33245	0.716	0.188	2.98937e-136	0	Izumo1r
Ly6a	1.26027e-133	1.39751	0.847	0.427	2.50807e-129	0	Ly6a
Itgb7	7.61235e-129	0.988415	0.827	0.449	1.51493e-124	0	Itgb7
Srgn	6.01677e-117	0.715521	0.985	0.956	1.1974e-112	0	Srgn
Il2ra	8.63371e-108	1.31473	0.691	0.248	1.71819e-103	0	Il2ra
H2-K1	3.31761e-106	0.45869	0.998	0.997	6.60238e-102	0	H2-K1
Tnfrsf9	1.97515e-104	1.11547	0.863	0.554	3.93075e-100	0	Tnfrsf9
Capg	3.2538e-98	0.776937	0.892	0.64	6.47538e-94	0	Capg
Samsn1	2.73332e-95	0.949956	0.819	0.571	5.43958e-91	0	Samsn1
Fth1	2.24288e-94	0.481268	0.992	0.996	4.46355e-90	0	Fth1
Malat1	7.07534e-87	0.494561	0.999	0.998	1.40806e-82	0	Malat1
Gm28112	9.46349e-87	0.978716	0.526	0.13	1.88333e-82	0	Gm28112
Zfp36l1	6.89042e-84	0.88231	0.835	0.655	1.37126e-79	0	Zfp36l1
Serinc3	2.81481e-82	0.792064	0.772	0.574	5.60176e-78	0	Serinc3
Itgae	4.26772e-82	1.04245	0.412	0.063	8.49319e-78	0	Itgae
Glrx	1.37276e-79	0.964956	0.719	0.453	2.73194e-75	0	Glrx
Ifngr1	7.0606e-79	0.693941	0.88	0.742	1.40513e-74	0	Ifngr1
Hif1a	4.18235e-78	0.71867	0.875	0.661	8.32329e-74	0	Hif1a
Vim	3.9403e-76	0.860547	0.937	0.802	7.8416e-72	0	Vim
Cebpb	1.35676e-74	0.985557	0.618	0.326	2.70009e-70	0	Cebpb
Gimap7	2.18626e-74	0.797384	0.773	0.562	4.35087e-70	0	Gimap7
Klrg1	9.11943e-71	1.06805	0.392	0.063	1.81486e-66	0	Klrg1
Ass1	1.37069e-69	0.862591	0.61	0.254	2.72781e-65	0	Ass1
Cd81	1.49584e-69	0.888741	0.537	0.151	2.97687e-65	0	Cd81
Samhd1	1.35671e-68	0.733447	0.783	0.542	2.69998e-64	0	Samhd1
Npc2	3.5508e-66	0.571802	0.867	0.822	7.06644e-62	0	Npc2
S100a10	9.36398e-66	0.568343	0.955	0.918	1.86353e-61	0	S100a10
Ecm1	4.73045e-65	0.805508	0.419	0.1	9.41407e-61	0	Ecm1
Pglyrp1	1.00956e-64	0.985133	0.675	0.425	2.00912e-60	0	Pglyrp1
Cd5	3.03336e-63	0.711286	0.704	0.433	6.03668e-59	0	Cd5
Sdf4	1.89026e-62	0.549733	0.908	0.783	3.76181e-58	0	Sdf4
Bmyc	8.63101e-59	0.835039	0.428	0.154	1.71766e-54	0	Bmyc
Itm2b	3.87031e-58	0.436739	0.943	0.942	7.70231e-54	0	Itm2b
B2m	1.30951e-57	0.299987	0.997	0.998	2.60606e-53	0	B2m
Cyb5a	2.29829e-57	0.684292	0.711	0.55	4.57383e-53	0	Cyb5a
Snx18	3.04401e-57	0.762484	0.51	0.245	6.05788e-53	0	Snx18
Cyba	4.26348e-56	0.496981	0.896	0.841	8.48474e-52	0	Cyba
Shisa5	1.03477e-54	0.444268	0.969	0.958	2.05929e-50	0	Shisa5
Ctsz	1.07826e-53	0.709899	0.544	0.259	2.14585e-49	0	Ctsz
Ltb	1.49115e-52	0.587417	0.933	0.919	2.96753e-48	0	Ltb
Crem	1.00431e-51	0.661371	0.684	0.486	1.99867e-47	0	Crem
Nfkbia	5.54332e-51	0.838876	0.819	0.656	1.10318e-46	0	Nfkbia
Ptprcap	7.59827e-51	0.534637	0.883	0.826	1.51213e-46	0	Ptprcap
H2-Q7	3.97396e-49	0.493925	0.864	0.806	7.90857e-45	0	H2-Q7
Pmepa1	1.52485e-48	0.802033	0.644	0.428	3.0346e-44	0	Pmepa1
Timp2	2.01922e-48	0.705902	0.417	0.163	4.01846e-44	0	Timp2
Pnrc1	2.65213e-46	0.531003	0.858	0.791	5.27801e-42	0	Pnrc1
Gimap3	8.81404e-46	0.520365	0.875	0.812	1.75408e-41	0	Gimap3
Wnk1	1.06575e-45	0.709201	0.767	0.647	2.12094e-41	0	Wnk1
Rora	2.49828e-45	0.668144	0.612	0.358	4.97183e-41	0	Rora
Gzmb	2.37599e-44	0.817781	0.744	0.519	4.72845e-40	0	Gzmb
Sdc4	2.88372e-44	0.609481	0.251	0.042	5.73889e-40	0	Sdc4
Tnfrsf1b	3.48442e-44	0.749158	0.522	0.297	6.93434e-40	0	Tnfrsf1b
Actg1	8.04888e-44	0.410289	0.994	0.992	1.60181e-39	0	Actg1
Peli1	4.74917e-43	0.611684	0.766	0.661	9.45133e-39	0	Peli1
Cytip	4.94903e-43	0.489257	0.847	0.818	9.84907e-39	0	Cytip
Chchd10	1.15926e-42	0.844985	0.518	0.284	2.30704e-38	0	Chchd10
Cd53	2.17601e-42	0.380832	0.904	0.894	4.33047e-38	0	Cd53
Ddit4	2.76236e-42	0.764247	0.554	0.363	5.49738e-38	0	Ddit4
Rap1b	5.62743e-42	0.450475	0.847	0.817	1.11992e-37	0	Rap1b
Itm2c	7.84615e-42	0.547012	0.641	0.522	1.56146e-37	0	Itm2c
Ypel3	7.30623e-41	0.558567	0.617	0.468	1.45401e-36	0	Ypel3
Lamc1	2.24802e-40	0.628072	0.345	0.132	4.47379e-36	0	Lamc1
H2-T23	4.84914e-40	0.438789	0.882	0.841	9.65028e-36	0	H2-T23
Ikzf4	9.73287e-40	0.692574	0.381	0.157	1.93694e-35	0	Ikzf4
H2-T22	2.43229e-39	0.463705	0.748	0.692	4.84051e-35	0	H2-T22
mt-Rnr2	9.54198e-39	0.278483	0.999	0.998	1.89895e-34	0	mt-Rnr2
Dusp1	3.16846e-38	0.723768	0.594	0.394	6.30555e-34	0	Dusp1
Pla2g16	4.89903e-38	0.500628	0.734	0.658	9.74956e-34	0	Pla2g16
Gpx4	5.31892e-38	0.521252	0.729	0.642	1.05852e-33	0	Gpx4
Gm2a	1.96022e-37	0.723452	0.546	0.337	3.90103e-33	0	Gm2a
Iigp1	2.40776e-37	0.698256	0.403	0.17	4.79169e-33	0	Iigp1
Sdcbp2	1.92499e-36	0.589811	0.405	0.196	3.83092e-32	0	Sdcbp2
Cst3	1.12738e-35	0.540887	0.739	0.624	2.24359e-31	0	Cst3
Map1lc3b	1.66264e-35	0.444025	0.776	0.735	3.30882e-31	0	Map1lc3b
Reep5	4.95987e-35	0.399866	0.829	0.73	9.87063e-31	0	Reep5
Itgb8	8.67397e-35	0.532198	0.218	0.03	1.72621e-30	0	Itgb8
Cmtm7	9.16071e-35	0.621728	0.685	0.477	1.82307e-30	0	Cmtm7
Wls	7.50817e-34	0.548653	0.377	0.18	1.4942e-29	0	Wls
Zdhhc18	1.04537e-33	0.555606	0.731	0.623	2.08039e-29	0	Zdhhc18
Sat1	3.88463e-33	0.534832	0.719	0.618	7.7308e-29	0	Sat1
Rln3	4.1241e-33	0.636807	0.241	0.052	8.20738e-29	0	Rln3
Rnase4	5.64902e-33	0.491792	0.237	0.038	1.12421e-28	0	Rnase4
Gimap6	7.09153e-33	0.476841	0.796	0.712	1.41128e-28	0	Gimap6
Fam46a	8.76491e-33	0.972898	0.499	0.313	1.74431e-28	0	Fam46a
P2ry10	1.17846e-32	0.591986	0.572	0.385	2.34526e-28	0	P2ry10
Tspan32	2.13266e-32	0.493645	0.351	0.132	4.24421e-28	0	Tspan32
Snx2	4.99043e-32	0.538322	0.477	0.312	9.93146e-28	0	Snx2
Mbd2	2.23052e-31	0.423077	0.739	0.692	4.43896e-27	0	Mbd2
Gm37881	2.36161e-31	0.58537	0.275	0.077	4.69985e-27	0	Gm37881
Cd200r1	2.41741e-31	0.519905	0.265	0.083	4.81089e-27	0	Cd200r1
Swap70	2.91134e-31	0.545605	0.3	0.102	5.79386e-27	0	Swap70
Mxd1	8.17106e-31	0.635965	0.438	0.242	1.62612e-26	0	Mxd1
Got1	9.36367e-31	0.693736	0.457	0.292	1.86346e-26	0	Got1
Crip1	1.07107e-30	0.649176	0.876	0.778	2.13153e-26	0	Crip1
Mif4gd	1.14631e-30	0.552284	0.538	0.361	2.28128e-26	0	Mif4gd
AW112010	7.2383e-30	0.334103	0.977	0.945	1.44049e-25	0	AW112010
Lrrc32	2.23483e-29	0.514839	0.213	0.037	4.44754e-25	0	Lrrc32
Gbp7	3.63239e-29	0.582355	0.686	0.541	7.22882e-25	0	Gbp7
Fabp5	4.8209e-29	0.764948	0.456	0.289	9.59406e-25	0	Fabp5
Ddx5	1.4537e-28	0.275925	0.961	0.971	2.893e-24	0	Ddx5
Pkm	1.56681e-28	0.451672	0.885	0.821	3.11812e-24	0	Pkm
Trp53inp1	1.63182e-28	0.527768	0.405	0.23	3.24748e-24	0	Trp53inp1
Cd6	5.76738e-28	0.481488	0.601	0.471	1.14777e-23	0	Cd6
Psen2	2.75473e-27	0.51609	0.393	0.213	5.48219e-23	0	Psen2
Ctss	7.02326e-27	0.553071	0.543	0.381	1.3977e-22	0	Ctss
Gna13	8.34712e-27	0.439274	0.652	0.552	1.66116e-22	0	Gna13
Cd4	8.78133e-27	0.365269	0.425	0.208	1.74757e-22	0	Cd4
Xist	2.58535e-26	0.315287	0.95	0.912	5.14511e-22	0	Xist
Ube2b	4.27435e-26	0.373816	0.767	0.736	8.50639e-22	0	Ube2b
Socs2	6.15446e-26	0.553699	0.291	0.114	1.2248e-21	0	Socs2
Neb	7.42691e-26	0.547535	0.236	0.058	1.47803e-21	0	Neb
Sypl	1.1745e-25	0.477351	0.34	0.173	2.33737e-21	0	Sypl
Sell	1.51701e-25	0.502921	0.455	0.238	3.01901e-21	0	Sell
Smco4	2.16221e-25	0.452122	0.406	0.251	4.30301e-21	0	Smco4
Gabarap	3.10205e-25	0.34944	0.833	0.81	6.17339e-21	0	Gabarap
Chd3	3.88867e-25	0.463976	0.583	0.428	7.73884e-21	0	Chd3
Ncmap	5.44266e-25	0.381843	0.153	0.017	1.08314e-20	0	Ncmap
N4bp1	5.44511e-25	0.61861	0.421	0.235	1.08363e-20	0	N4bp1
Fyb	5.84937e-25	0.309728	0.821	0.818	1.16408e-20	0	Fyb
Grb2	7.65331e-25	0.480576	0.645	0.556	1.52309e-20	0	Grb2
Ptpn18	1.20979e-24	0.251982	0.921	0.942	2.4076e-20	0	Ptpn18
Ptp4a2	2.1412e-24	0.357107	0.839	0.825	4.26121e-20	0	Ptp4a2
Ccr5	2.22454e-24	0.662019	0.475	0.303	4.42706e-20	0	Ccr5
Cd37	2.99229e-24	0.398555	0.73	0.693	5.95496e-20	0	Cd37
Fxyd5	3.5756e-24	0.267	0.972	0.976	7.1158e-20	0	Fxyd5
Vmp1	6.0977e-24	0.576014	0.604	0.512	1.2135e-19	0	Vmp1
Cast	8.13342e-24	0.49611	0.564	0.463	1.61863e-19	0	Cast
Clec2d	8.3098e-24	0.511321	0.7	0.631	1.65373e-19	0	Clec2d
Arl5c	1.3909e-23	0.443354	0.298	0.138	2.76804e-19	0	Arl5c
Zbp1	6.67644e-23	0.429622	0.607	0.519	1.32868e-18	0	Zbp1
Nfil3	1.16516e-22	0.599609	0.432	0.283	2.31878e-18	0	Nfil3
Ftl1	1.24809e-22	0.265358	0.944	0.959	2.48382e-18	0	Ftl1
Ighm	2.90429e-22	0.509583	0.33	0.151	5.77984e-18	0	Ighm
Ubald2	3.85589e-22	0.640368	0.611	0.525	7.67362e-18	0	Ubald2
S100a13	3.93351e-22	0.338479	0.784	0.762	7.82808e-18	0	S100a13
Cxcr4	8.0018e-22	0.485366	0.302	0.149	1.59244e-17	0	Cxcr4
Cd27	8.97577e-22	0.491684	0.602	0.508	1.78627e-17	0	Cd27
Fam129a	1.04582e-21	0.465262	0.347	0.226	2.08128e-17	0	Fam129a
Mcl1	1.3976e-21	0.288848	0.808	0.81	2.78136e-17	0	Mcl1
Spcs2	1.50664e-21	0.345803	0.829	0.816	2.99836e-17	0	Spcs2
Gng5	4.33441e-21	0.277659	0.864	0.864	8.62591e-17	0	Gng5
Ltf	6.32192e-21	0.673403	0.121	0.02	1.25813e-16	0	Ltf
Akap13	6.96781e-21	0.362427	0.7	0.684	1.38666e-16	0	Akap13
Trp53i11	7.64627e-21	0.485955	0.323	0.16	1.52168e-16	0	Trp53i11
Nrip1	9.58893e-21	0.631155	0.416	0.273	1.90829e-16	0	Nrip1
Il10	1.0715e-20	0.609768	0.135	0.019	2.13238e-16	0	Il10
Il1rl1	1.48e-20	0.583162	0.194	0.059	2.94536e-16	0	Il1rl1
Tnfrsf13b	1.51871e-20	0.434255	0.248	0.09	3.02238e-16	0	Tnfrsf13b
Ptprc	1.61866e-20	0.292729	0.91	0.913	3.2213e-16	0	Ptprc
Cxcr3	1.99599e-20	0.468764	0.446	0.264	3.97221e-16	0	Cxcr3
Abracl	2.61745e-20	0.279326	0.835	0.836	5.20899e-16	0	Abracl
Fam46c	2.89417e-20	0.496417	0.387	0.219	5.75969e-16	0	Fam46c
AC149090.1	3.08674e-20	0.349992	0.626	0.598	6.14292e-16	0	AC149090.1
Ebi3	3.20325e-20	0.318566	0.171	0.05	6.37479e-16	0	Ebi3
Sytl1	4.38832e-20	0.414768	0.268	0.125	8.7332e-16	0	Sytl1
A430093F15Rik	4.43416e-20	0.47353	0.363	0.229	8.82443e-16	0	A430093F15Rik
Gata3	6.49133e-20	0.50464	0.483	0.363	1.29184e-15	0	Gata3
Prdm1	1.82498e-19	0.456521	0.31	0.188	3.63189e-15	0	Prdm1
Stat1	2.46927e-19	0.40897	0.696	0.644	4.91408e-15	0	Stat1
Zbtb38	3.32305e-19	0.503052	0.376	0.243	6.6132e-15	0	Zbtb38
Rgs10	4.05251e-19	0.391397	0.495	0.362	8.0649e-15	0	Rgs10
Tap2	4.3427e-19	0.372556	0.61	0.564	8.64241e-15	0	Tap2
Isg20	6.01513e-19	0.491271	0.457	0.294	1.19707e-14	0	Isg20
Gm38009	6.32974e-19	0.346929	0.146	0.035	1.25968e-14	0	Gm38009
Rnaset2a	1.4971e-18	0.378517	0.536	0.493	2.97938e-14	0	Rnaset2a
Lgals1	1.6179e-18	0.323632	0.947	0.832	3.21978e-14	0	Lgals1
Serpina3g	1.80916e-18	0.559273	0.341	0.199	3.6004e-14	0	Serpina3g
Slc9a3r1	3.533e-18	0.417911	0.524	0.443	7.03102e-14	0	Slc9a3r1
Ccs	4.07682e-18	0.441283	0.339	0.221	8.11327e-14	0	Ccs
Malt1	4.11053e-18	0.516915	0.388	0.264	8.18037e-14	0	Malt1
Metrnl	4.91542e-18	0.483047	0.281	0.147	9.78218e-14	0	Metrnl
Slc15a3	1.18779e-17	0.368893	0.197	0.076	2.36381e-13	0	Slc15a3
Pkp3	1.35072e-17	0.542686	0.504	0.38	2.68807e-13	0	Pkp3
Ets1	1.4123e-17	0.331338	0.834	0.833	2.81062e-13	0	Ets1
Selenop	1.44518e-17	0.320201	0.263	0.136	2.87606e-13	0	Selenop
Rilpl2	1.56647e-17	0.508004	0.462	0.373	3.11744e-13	0	Rilpl2
Rnf125	1.86314e-17	0.394421	0.433	0.329	3.70783e-13	0	Rnf125
Ctsb	2.25827e-17	0.4239	0.59	0.531	4.49418e-13	0	Ctsb
Smpdl3a	5.143e-17	0.426235	0.505	0.394	1.02351e-12	0	Smpdl3a
Zfp292	5.21173e-17	0.455885	0.606	0.553	1.03719e-12	0	Zfp292
Lbh	6.48482e-17	0.440813	0.513	0.411	1.29054e-12	0	Lbh
Cdkn1b	7.18336e-17	0.450242	0.57	0.477	1.42956e-12	0	Cdkn1b
Gm6637	7.44261e-17	0.302241	0.136	0.033	1.48115e-12	0	Gm6637
Tank	1.21675e-16	0.473253	0.359	0.233	2.42146e-12	0	Tank
Crlf2	1.22681e-16	0.459917	0.55	0.469	2.44148e-12	0	Crlf2
Igtp	1.32885e-16	0.384959	0.591	0.508	2.64454e-12	0	Igtp
Epcam	1.3445e-16	0.296367	0.111	0.021	2.6757e-12	0	Epcam
Tmem123	1.77888e-16	0.420007	0.561	0.503	3.54015e-12	0	Tmem123
Gnb2	2.66519e-16	0.307937	0.773	0.747	5.304e-12	0	Gnb2
Snx20	3.72975e-16	0.387032	0.355	0.243	7.42258e-12	0	Snx20
Cdk2ap2	4.32843e-16	0.403611	0.695	0.674	8.61401e-12	0	Cdk2ap2
Anp32a	4.48802e-16	0.294636	0.791	0.778	8.93161e-12	0	Anp32a
Srrm2	5.00521e-16	0.273496	0.834	0.845	9.96087e-12	0	Srrm2
Selenok	5.77853e-16	0.295354	0.765	0.747	1.14998e-11	0	Selenok
Sec62	6.57612e-16	0.303796	0.726	0.726	1.30871e-11	0	Sec62
Gimap1	6.93301e-16	0.304903	0.732	0.732	1.37974e-11	0	Gimap1
2810474O19Rik	7.58529e-16	0.511798	0.556	0.472	1.50955e-11	0	2810474O19Rik
Gm8818	7.93144e-16	0.330101	0.138	0.044	1.57844e-11	0	Gm8818
Stx11	1.22833e-15	0.474362	0.368	0.248	2.44449e-11	0	Stx11
Zfp281	2.08651e-15	0.441786	0.326	0.2	4.15237e-11	0	Zfp281
Ccrl2	3.15275e-15	0.512969	0.288	0.151	6.27428e-11	0	Ccrl2
Tax1bp1	3.19607e-15	0.434285	0.664	0.616	6.36051e-11	0	Tax1bp1
Rgs1	3.58069e-15	0.287926	0.672	0.599	7.12593e-11	0	Rgs1
1810026B05Rik	5.01902e-15	0.303255	0.707	0.705	9.98836e-11	0	1810026B05Rik
Mxi1	8.73614e-15	0.483969	0.351	0.232	1.73858e-10	0	Mxi1
Penk	1.10963e-14	0.596754	0.156	0.063	2.20828e-10	0	Penk
Ttc39c	1.29974e-14	0.452369	0.325	0.199	2.58661e-10	0	Ttc39c
Cbl	1.3202e-14	0.335809	0.402	0.345	2.62732e-10	0	Cbl
Znrf1	1.56077e-14	0.370531	0.379	0.28	3.10609e-10	0	Znrf1
Retreg1	1.56576e-14	0.432984	0.39	0.248	3.11602e-10	0	Retreg1
Scand1	1.70125e-14	0.280205	0.785	0.807	3.38566e-10	0	Scand1
Rapsn	2.07444e-14	0.307466	0.144	0.045	4.12835e-10	0	Rapsn
Picalm	3.75466e-14	0.434764	0.498	0.422	7.47214e-10	0	Picalm
Vamp8	4.14341e-14	0.298133	0.656	0.629	8.2458e-10	0	Vamp8
Rab11a	4.20414e-14	0.476014	0.482	0.4	8.36665e-10	0	Rab11a
Ccnd2	5.58794e-14	0.276728	0.71	0.7	1.11206e-09	0	Ccnd2
Zc3h12d	7.27635e-14	0.386818	0.249	0.125	1.44807e-09	0	Zc3h12d
Ahnak	7.66306e-14	0.459661	0.626	0.583	1.52503e-09	0	Ahnak
Tap1	1.30618e-13	0.354183	0.657	0.622	2.59942e-09	0	Tap1
Vasp	1.30654e-13	0.308846	0.753	0.743	2.60015e-09	0	Vasp
Mdh1	1.53442e-13	0.361554	0.706	0.686	3.05365e-09	0	Mdh1
Tiam1	1.68663e-13	0.367148	0.221	0.102	3.35657e-09	0	Tiam1
Atp2b4	1.93466e-13	0.441115	0.397	0.304	3.85017e-09	0	Atp2b4
Gadd45b	2.09273e-13	0.445341	0.487	0.356	4.16474e-09	0	Gadd45b
Birc3	2.93179e-13	0.438733	0.312	0.206	5.83455e-09	0	Birc3
Rhoh	4.75622e-13	0.396417	0.509	0.443	9.46535e-09	0	Rhoh
Spin1	5.51841e-13	0.380229	0.334	0.235	1.09822e-08	0	Spin1
BC064078	6.68339e-13	0.280669	0.17	0.084	1.33006e-08	0	BC064078
Cish	7.11463e-13	0.477527	0.438	0.324	1.41588e-08	0	Cish
Rac1	7.38941e-13	0.296046	0.784	0.77	1.47057e-08	0	Rac1
Elf1	1.06971e-12	0.328529	0.63	0.627	2.12884e-08	0	Elf1
Il4ra	1.14136e-12	0.341645	0.269	0.168	2.27141e-08	0	Il4ra
Ankrd12	1.2613e-12	0.448482	0.526	0.472	2.51011e-08	0	Ankrd12
Pcyt1a	1.35864e-12	0.369626	0.147	0.051	2.70383e-08	0	Pcyt1a
Bnip3l	1.36275e-12	0.317763	0.588	0.567	2.712e-08	0	Bnip3l
Gm26669	1.36691e-12	0.301529	0.224	0.139	2.72029e-08	0	Gm26669
F730043M19Rik	2.08724e-12	0.363954	0.214	0.119	4.15382e-08	0	F730043M19Rik
Prrc2c	2.12175e-12	0.313889	0.728	0.748	4.22249e-08	0	Prrc2c
Arid5b	2.46322e-12	0.409682	0.35	0.258	4.90205e-08	0	Arid5b
Zc3hav1	2.58981e-12	0.407135	0.598	0.554	5.15397e-08	0	Zc3hav1
Dusp5	2.59704e-12	0.451131	0.553	0.438	5.16837e-08	0	Dusp5
Areg	4.18919e-12	0.91406	0.183	0.061	8.3369e-08	0	Areg
Rrad	4.5941e-12	0.355921	0.224	0.128	9.14271e-08	0	Rrad
Gm20186	5.00831e-12	0.417456	0.275	0.178	9.96705e-08	0	Gm20186
Podnl1	6.25385e-12	0.26387	0.185	0.103	1.24458e-07	0	Podnl1
Vrk1	7.12929e-12	0.332011	0.317	0.212	1.4188e-07	0	Vrk1
Gapdh	7.17523e-12	0.278116	0.969	0.948	1.42794e-07	0	Gapdh
Dgat1	7.63244e-12	0.382874	0.298	0.199	1.51893e-07	0	Dgat1
Slamf1	1.15248e-11	0.307686	0.273	0.179	2.29354e-07	0	Slamf1
Cep85l	1.28604e-11	0.263463	0.128	0.04	2.55935e-07	0	Cep85l
Clk1	1.39845e-11	0.377648	0.539	0.476	2.78305e-07	0	Clk1
Ncf4	1.42389e-11	0.291066	0.514	0.497	2.83368e-07	0	Ncf4
Gbp3	1.59853e-11	0.483756	0.403	0.27	3.18124e-07	0	Gbp3
Bcl3	1.73065e-11	0.339864	0.237	0.139	3.44417e-07	0	Bcl3
Cited2	2.5923e-11	0.487293	0.488	0.409	5.15894e-07	0	Cited2
Prr13	2.7448e-11	0.260785	0.661	0.654	5.46242e-07	0	Prr13
Fam110a	2.88888e-11	0.354316	0.212	0.114	5.74916e-07	0	Fam110a
Aldoa	2.9853e-11	0.298905	0.874	0.862	5.94104e-07	0	Aldoa
Rsrc2	3.08776e-11	0.292651	0.614	0.623	6.14495e-07	0	Rsrc2
Sgip1	3.11623e-11	0.392302	0.126	0.03	6.2016e-07	0	Sgip1
Klf6	3.20266e-11	0.329195	0.735	0.707	6.37361e-07	0	Klf6
Dnajc1	4.02151e-11	0.323676	0.477	0.467	8.0032e-07	0	Dnajc1
Gdap10	4.3885e-11	0.25823	0.16	0.087	8.73355e-07	0	Gdap10
Nr3c1	5.10986e-11	0.350792	0.463	0.402	1.01691e-06	0	Nr3c1
Camk4	6.37552e-11	0.402257	0.548	0.487	1.26879e-06	0	Camk4
Itih5	6.40368e-11	0.290418	0.146	0.07	1.2744e-06	0	Itih5
Tgif1	6.63725e-11	0.410574	0.309	0.217	1.32088e-06	0	Tgif1
Fem1c	8.33153e-11	0.372533	0.263	0.176	1.65806e-06	0	Fem1c
Gm42418	1.14828e-10	0.292022	0.986	0.992	2.28518e-06	0	Gm42418
Trf	1.25239e-10	0.290988	0.11	0.026	2.49239e-06	0	Trf
Mier1	1.49066e-10	0.477128	0.547	0.462	2.96657e-06	0	Mier1
Pak2	1.61423e-10	0.282982	0.667	0.674	3.21249e-06	0	Pak2
Snx3	1.74538e-10	0.323486	0.649	0.624	3.47347e-06	0	Snx3
Glipr1	1.79207e-10	0.423629	0.379	0.292	3.5664e-06	0	Glipr1
Vps54	2.03338e-10	0.404074	0.325	0.226	4.04662e-06	0	Vps54
Gm37033	2.09902e-10	0.453484	0.501	0.418	4.17726e-06	0	Gm37033
Chmp2a	2.1662e-10	0.257474	0.642	0.634	4.31095e-06	0	Chmp2a
Tmed10	2.73077e-10	0.290986	0.534	0.528	5.43452e-06	0	Tmed10
Pmaip1	2.92946e-10	0.440736	0.273	0.183	5.82991e-06	0	Pmaip1
Sdhaf1	3.45463e-10	0.389437	0.328	0.222	6.87507e-06	0	Sdhaf1
Rab11fip1	3.98299e-10	0.292601	0.198	0.121	7.92655e-06	0	Rab11fip1
Lrrfip1	4.441e-10	0.323843	0.65	0.646	8.83803e-06	0	Lrrfip1
2010111I01Rik	5.39804e-10	0.384453	0.36	0.293	1.07426e-05	0	2010111I01Rik
Trib1	5.48153e-10	0.307041	0.153	0.065	1.09088e-05	0	Trib1
Ormdl3	5.64961e-10	0.395908	0.311	0.227	1.12433e-05	0	Ormdl3
Hcls1	5.85056e-10	0.308822	0.602	0.587	1.16432e-05	0	Hcls1
Leprotl1	7.36676e-10	0.298665	0.62	0.628	1.46606e-05	0	Leprotl1
Lncpint	1.23587e-09	0.290271	0.245	0.16	2.45951e-05	0	Lncpint
St8sia4	1.23843e-09	0.388938	0.357	0.258	2.46459e-05	0	St8sia4
Oxr1	1.30238e-09	0.303829	0.259	0.178	2.59186e-05	0	Oxr1
Syt11	1.62255e-09	0.308566	0.21	0.114	3.22903e-05	0	Syt11
Nfkbiz	2.08972e-09	0.44961	0.451	0.366	4.15876e-05	0	Nfkbiz
Lamp2	2.25098e-09	0.356426	0.32	0.244	4.47968e-05	0	Lamp2
Ets2	2.36578e-09	0.287885	0.176	0.094	4.70814e-05	0	Ets2
Tgfbr1	2.61305e-09	0.302451	0.168	0.082	5.20023e-05	0	Tgfbr1
Ankrd11	2.64409e-09	0.339682	0.672	0.69	5.262e-05	0	Ankrd11
Aebp2	3.09666e-09	0.332404	0.564	0.539	6.16266e-05	0	Aebp2
Vamp5	4.64223e-09	0.321682	0.281	0.188	9.23851e-05	0	Vamp5
Birc2	6.59337e-09	0.391405	0.329	0.243	0.000131215	0	Birc2
Slc2a1	7.66136e-09	0.366316	0.307	0.257	0.000152469	0	Slc2a1
Gm37728	9.61187e-09	0.26567	0.204	0.126	0.000191286	0	Gm37728
Sla	1.01891e-08	0.362387	0.506	0.44	0.000202774	0	Sla
Isy1	1.03622e-08	0.354554	0.509	0.5	0.000206217	0	Isy1
Arid4a	1.10058e-08	0.373739	0.441	0.375	0.000219026	0	Arid4a
Arid4b	1.16826e-08	0.388347	0.491	0.448	0.000232496	0	Arid4b
Foxo1	1.35194e-08	0.337625	0.382	0.304	0.00026905	0	Foxo1
Gm37039	1.35474e-08	0.283794	0.158	0.068	0.000269606	0	Gm37039
Irf1	1.87828e-08	0.319393	0.473	0.442	0.000373797	0	Irf1
Lrba	1.88716e-08	0.297361	0.205	0.137	0.000375563	0	Lrba
Ifrd1	1.93275e-08	0.483243	0.435	0.379	0.000384636	0	Ifrd1
Hbs1l	2.01764e-08	0.335962	0.254	0.166	0.00040153	0	Hbs1l
Agfg1	2.17957e-08	0.392469	0.51	0.453	0.000433757	0	Agfg1
Batf	2.2024e-08	0.38628	0.412	0.328	0.0004383	0	Batf
Mthfsl	2.56187e-08	0.303846	0.268	0.199	0.000509837	0	Mthfsl
Slc16a3	2.68001e-08	0.499193	0.265	0.151	0.00053335	0	Slc16a3
Ahr	2.73546e-08	0.44717	0.265	0.175	0.000544385	0	Ahr
Gna15	2.85908e-08	0.263183	0.29	0.231	0.000568986	0	Gna15
Ndfip1	3.55295e-08	0.261753	0.625	0.614	0.000707073	0	Ndfip1
Samd9l	4.59049e-08	0.341513	0.411	0.334	0.000913552	0	Samd9l
Ndrg1	4.60527e-08	0.372747	0.251	0.183	0.000916494	0	Ndrg1
H2-T10	5.77776e-08	0.33768	0.391	0.324	0.00114983	0	H2-T10
Ube2h	6.09315e-08	0.274871	0.389	0.354	0.0012126	0	Ube2h
Mxd4	6.59895e-08	0.349665	0.416	0.336	0.00131326	0	Mxd4
Tnfaip3	8.35856e-08	0.325932	0.572	0.529	0.00166344	0	Tnfaip3
Psenen	8.36626e-08	0.268862	0.681	0.694	0.00166497	0	Psenen
Smc4	8.74899e-08	0.261798	0.576	0.538	0.00174114	0	Smc4
Ccng2	8.96863e-08	0.337686	0.3	0.222	0.00178485	0	Ccng2
Nampt	9.34536e-08	0.360563	0.266	0.188	0.00185982	0	Nampt
P4ha1	9.61595e-08	0.459996	0.372	0.277	0.00191367	0	P4ha1
Fnbp1	1.03234e-07	0.314313	0.465	0.45	0.00205446	0	Fnbp1
Spint2	1.40683e-07	0.340235	0.414	0.377	0.00279973	0	Spint2
Eva1b	1.68017e-07	0.33048	0.419	0.362	0.00334371	0	Eva1b
Msi2	1.82059e-07	0.345435	0.426	0.396	0.00362316	0	Msi2
Psme2	1.86725e-07	0.266545	0.794	0.812	0.00371602	0	Psme2
Lmna	1.94262e-07	0.382485	0.256	0.154	0.00386602	0	Lmna
H2-Q4	2.04467e-07	0.276442	0.675	0.692	0.0040691	0	H2-Q4
Gbp5	2.26945e-07	0.327799	0.232	0.152	0.00451644	0	Gbp5
Glmp	2.30833e-07	0.339194	0.444	0.397	0.00459381	0	Glmp
Pigx	2.40596e-07	0.348356	0.431	0.39	0.00478809	0	Pigx
Gm45266	2.42026e-07	0.286929	0.166	0.089	0.00481655	0	Gm45266
Matk	2.57589e-07	0.310306	0.199	0.125	0.00512629	0	Matk
Bnip3	2.71869e-07	0.414839	0.242	0.161	0.00541047	0	Bnip3
Bloc1s1	3.07286e-07	0.262004	0.567	0.576	0.00611529	0	Bloc1s1
Syngr2	3.11558e-07	0.328901	0.382	0.35	0.00620031	0	Syngr2
Dock2	3.1359e-07	0.252204	0.499	0.508	0.00624075	0	Dock2
Fam96b	3.22264e-07	0.26904	0.459	0.447	0.00641338	0	Fam96b
Rel	3.38733e-07	0.438301	0.438	0.382	0.00674113	0	Rel
Tnfaip8	3.46393e-07	0.302115	0.55	0.524	0.00689357	0	Tnfaip8
Snhg5	4.02965e-07	0.343161	0.228	0.153	0.00801941	0	Snhg5
Mafg	4.06853e-07	0.337997	0.25	0.184	0.00809679	0	Mafg
Slc25a19	4.59739e-07	0.324696	0.227	0.148	0.00914926	0	Slc25a19
Skil	4.97625e-07	0.320943	0.374	0.356	0.00990323	0	Skil
Gimap9	5.00223e-07	0.286518	0.489	0.475	0.00995493	0	Gimap9
Rap2a	5.05302e-07	0.342998	0.249	0.197	0.010056	0	Rap2a
Mtmr3	5.25964e-07	0.324868	0.221	0.144	0.0104672	0	Mtmr3
Pik3c2a	5.37066e-07	0.29923	0.21	0.131	0.0106882	0	Pik3c2a
Cd69	5.80169e-07	0.357901	0.401	0.35	0.0115459	0	Cd69
Nmb	7.32812e-07	0.302242	0.245	0.18	0.0145837	0	Nmb
M6pr	8.07351e-07	0.36515	0.457	0.408	0.0160671	0	M6pr
Rhog	8.31268e-07	0.290824	0.422	0.396	0.0165431	0	Rhog
Grap	8.39679e-07	0.36472	0.52	0.471	0.0167104	0	Grap
Tpp2	9.23863e-07	0.32328	0.367	0.328	0.0183858	0	Tpp2
Oser1	9.51824e-07	0.301299	0.373	0.344	0.0189422	0	Oser1
Nucb1	1.07741e-06	0.283222	0.474	0.469	0.0214416	0	Nucb1
Serinc1	1.08588e-06	0.334675	0.416	0.374	0.0216102	0	Serinc1
Jarid2	1.11379e-06	0.329179	0.408	0.384	0.0221656	0	Jarid2
Cflar	1.20366e-06	0.399585	0.406	0.335	0.0239541	0	Cflar
H1f0	1.31707e-06	0.392137	0.256	0.166	0.026211	0	H1f0
Rock1	1.35258e-06	0.267515	0.615	0.625	0.0269176	0	Rock1
Ncoa3	1.35823e-06	0.407275	0.325	0.209	0.0270301	0	Ncoa3
Cds2	1.36784e-06	0.2797	0.274	0.235	0.0272215	0	Cds2
Kat2b	1.42686e-06	0.278592	0.252	0.188	0.0283958	0	Kat2b
Cd48	1.80539e-06	0.267553	0.602	0.607	0.0359291	0	Cd48
Tnrc6b	1.85015e-06	0.264047	0.461	0.443	0.0368198	0	Tnrc6b
Rbms1	1.93825e-06	0.308728	0.479	0.468	0.0385731	0	Rbms1
Gpx1	1.9622e-06	0.298701	0.496	0.475	0.0390498	0	Gpx1
Gm44292	2.30374e-06	0.279351	0.201	0.15	0.0458468	0	Gm44292
Smad7	2.38508e-06	0.345182	0.569	0.564	0.0474655	0	Smad7
Ramp1	2.50993e-06	0.26645	0.403	0.405	0.0499501	0	Ramp1
Serp1	2.63505e-06	0.35751	0.539	0.502	0.0524401	0	Serp1
Tspan13	2.67177e-06	0.256041	0.406	0.379	0.053171	0	Tspan13
Dusp4	2.85159e-06	0.297696	0.428	0.39	0.0567494	0	Dusp4
Mthfs	3.01871e-06	0.259297	0.222	0.165	0.0600754	0	Mthfs
Gcnt1	3.22512e-06	0.324362	0.214	0.153	0.0641831	0	Gcnt1
Mdfic	3.31232e-06	0.351222	0.401	0.373	0.0659185	0	Mdfic
Ncoa7	3.33863e-06	0.291101	0.282	0.256	0.0664421	0	Ncoa7
CT009757.3	3.5578e-06	0.431401	0.298	0.203	0.0708038	0	CT009757.3
Mtdh	3.71689e-06	0.276453	0.553	0.557	0.0739699	0	Mtdh
Unc119	4.14037e-06	0.252945	0.344	0.338	0.0823974	0	Unc119
Neat1	4.60853e-06	0.328453	0.522	0.513	0.0917144	0	Neat1
2310001H17Rik	4.63177e-06	0.351366	0.328	0.259	0.0921768	0	2310001H17Rik
Arrdc1	5.43143e-06	0.286357	0.27	0.234	0.108091	0	Arrdc1
Plec	5.51462e-06	0.344497	0.316	0.27	0.109746	0	Plec
Traf1	5.67488e-06	0.373836	0.434	0.394	0.112936	0	Traf1
Crlf3	5.83576e-06	0.293095	0.497	0.503	0.116137	0	Crlf3
Rsbn1l	6.79507e-06	0.257096	0.526	0.535	0.135229	0	Rsbn1l
Lamtor5	1.03194e-05	0.259834	0.498	0.497	0.205367	0	Lamtor5
Il7r	1.15433e-05	0.268243	0.567	0.535	0.229723	0	Il7r
Gimap8	1.19895e-05	0.312052	0.462	0.43	0.238604	0	Gimap8
Trim59	1.79349e-05	0.359069	0.294	0.23	0.356923	0	Trim59
Mllt6	2.09307e-05	0.317081	0.283	0.241	0.416542	0	Mllt6
Adam17	2.28043e-05	0.30134	0.29	0.248	0.453828	0	Adam17
Mapkapk2	2.28508e-05	0.353786	0.408	0.371	0.454754	0	Mapkapk2
2410006H16Rik	2.39945e-05	0.266851	0.687	0.734	0.477515	0	2410006H16Rik
Il2rg	2.57843e-05	0.250996	0.613	0.652	0.513133	0	Il2rg
Zdhhc20	2.79741e-05	0.289726	0.443	0.436	0.556713	0	Zdhhc20
Sema4d	2.85389e-05	0.305463	0.391	0.375	0.567952	0	Sema4d
AI504432	2.86749e-05	0.273338	0.194	0.139	0.57066	0	AI504432
Crbn	3.0253e-05	0.263765	0.408	0.395	0.602066	0	Crbn
Cklf	5.01138e-05	0.271449	0.326	0.299	0.997315	0	Cklf
Cdc42se2	5.93157e-05	0.286159	0.401	0.368	1	0	Cdc42se2
Heca	6.27881e-05	0.312551	0.348	0.293	1	0	Heca
Atp2b1	6.75939e-05	0.33775	0.499	0.477	1	0	Atp2b1
Cyfip1	7.41322e-05	0.261822	0.199	0.139	1	0	Cyfip1
Il3ra	8.86371e-05	0.255851	0.172	0.118	1	0	Il3ra
Pdia4	9.84871e-05	0.252536	0.356	0.36	1	0	Pdia4
Gm26532	0.000104031	0.266719	0.169	0.123	1	0	Gm26532
Zfp36	0.000107978	0.286055	0.392	0.34	1	0	Zfp36
Bcl2l1	0.00012	0.250842	0.206	0.164	1	0	Bcl2l1
Arl4a	0.000126782	0.312811	0.352	0.308	1	0	Arl4a
Eif4e3	0.000154352	0.251114	0.192	0.146	1	0	Eif4e3
A130071D04Rik	0.000158385	0.304723	0.592	0.598	1	0	A130071D04Rik
Cers4	0.000161201	0.273895	0.293	0.257	1	0	Cers4
Lrp10	0.00018732	0.270991	0.452	0.441	1	0	Lrp10
Il1r2	0.000241049	0.272864	0.168	0.104	1	0	Il1r2
Ppdpf	0.000253224	0.277093	0.442	0.434	1	0	Ppdpf
Ppm1b	0.000351737	0.285367	0.346	0.318	1	0	Ppm1b
Tsc22d4	0.000388309	0.261704	0.593	0.61	1	0	Tsc22d4
Cmtm6	0.000449724	0.254462	0.316	0.289	1	0	Cmtm6
Ash1l	0.000455587	0.261262	0.362	0.343	1	0	Ash1l
Ero1l	0.000501655	0.436138	0.294	0.261	1	0	Ero1l
Odc1	0.000521738	0.265823	0.349	0.344	1	0	Odc1
Ing2	0.000643452	0.262851	0.289	0.269	1	0	Ing2
Slc5a3	0.000727941	0.302038	0.236	0.219	1	0	Slc5a3
Ubl3	0.000787699	0.30691	0.413	0.389	1	0	Ubl3
4921524J17Rik	0.00115513	0.342697	0.363	0.331	1	0	4921524J17Rik
Stat5b	0.00128745	0.283649	0.292	0.255	1	0	Stat5b
Il10rb	0.00177778	0.267751	0.294	0.263	1	0	Il10rb
Zcchc6	0.00232147	0.258638	0.35	0.361	1	0	Zcchc6
Hilpda	0.00237706	0.286884	0.419	0.4	1	0	Hilpda
Asxl1	0.00240425	0.259261	0.211	0.156	1	0	Asxl1
Fam53b	0.00256588	0.257071	0.357	0.305	1	0	Fam53b
Icam1	0.00273474	0.286482	0.241	0.194	1	0	Icam1
AC117245.3	0.00294183	0.251135	0.138	0.08	1	0	AC117245.3
Il27ra	0.00389471	0.274199	0.375	0.356	1	0	Il27ra
Cdk17	0.00445956	0.256328	0.287	0.261	1	0	Cdk17
Ctnnb1	0.00448552	0.303207	0.376	0.381	1	0	Ctnnb1
Gm45223	0.0047186	0.269739	0.262	0.226	1	0	Gm45223
AY036118	0.00507689	0.292053	0.509	0.554	1	0	AY036118
Agpat4	0.00512692	0.307071	0.258	0.213	1	0	Agpat4
Rps11-ps2	0.00723211	0.267983	0.25	0.234	1	0	Rps11-ps2
A830080D01Rik	0.00931231	0.315072	0.188	0.131	1	0	A830080D01Rik
Lag3	1.36241e-191	1.20153	0.925	0.353	2.71132e-187	1	Lag3
Klrc1	1.1807e-176	1.08863	0.944	0.322	2.34972e-172	1	Klrc1
Cd8a	3.72857e-173	1.09135	0.958	0.376	7.42023e-169	1	Cd8a
Nkg7	7.3423e-164	1.08288	0.984	0.62	1.46119e-159	1	Nkg7
Cd8b1	1.38592e-157	0.916933	0.963	0.391	2.75811e-153	1	Cd8b1
Klrk1	8.00644e-155	0.928233	0.915	0.335	1.59336e-150	1	Klrk1
Klrd1	6.41488e-152	1.10698	0.93	0.43	1.27663e-147	1	Klrd1
Klrc2	3.97309e-141	0.846097	0.832	0.255	7.90684e-137	1	Klrc2
Rgs16	2.38328e-129	1.25922	0.813	0.317	4.74296e-125	1	Rgs16
Ptms	3.61365e-122	0.883787	0.889	0.463	7.19152e-118	1	Ptms
Cst7	1.28014e-108	0.772258	0.865	0.451	2.5476e-104	1	Cst7
Gpm6b	1.46177e-104	0.806649	0.511	0.079	2.90907e-100	1	Gpm6b
Slc17a6	1.97658e-104	1.10404	0.522	0.084	3.9336e-100	1	Slc17a6
Pdcd1	3.95418e-104	0.740954	0.878	0.396	7.86921e-100	1	Pdcd1
Bcl2a1d	9.35228e-101	0.753505	0.827	0.357	1.8612e-96	1	Bcl2a1d
Nrgn	1.06927e-100	1.28606	0.656	0.178	2.12796e-96	1	Nrgn
Ybx3	6.05613e-95	0.680186	0.859	0.409	1.20523e-90	1	Ybx3
Prf1	2.18662e-90	1.03121	0.721	0.287	4.35159e-86	1	Prf1
Irf8	2.32799e-89	0.899491	0.79	0.346	4.63294e-85	1	Irf8
Cxcr6	1.92571e-88	0.714923	0.88	0.416	3.83235e-84	1	Cxcr6
Rpl34	2.31442e-87	0.353341	0.999	0.995	4.60593e-83	1	Rpl34
Il18rap	3.56359e-84	0.741452	0.662	0.223	7.09191e-80	1	Il18rap
Serpinb6b	2.51951e-83	1.10441	0.677	0.255	5.01408e-79	1	Serpinb6b
Lgals3	8.84457e-80	0.658213	0.872	0.483	1.76016e-75	1	Lgals3
Jaml	5.96859e-79	0.650824	0.697	0.286	1.18781e-74	1	Jaml
Ostf1	2.7533e-78	0.555622	0.951	0.731	5.47935e-74	1	Ostf1
Cd160	2.33943e-74	0.729284	0.567	0.168	4.65569e-70	1	Cd160
Bhlhe40	3.39656e-74	0.674385	0.799	0.428	6.7595e-70	1	Bhlhe40
Bcl2a1b	1.7114e-71	0.534465	0.885	0.526	3.40586e-67	1	Bcl2a1b
Rbpj	1.07206e-68	0.558483	0.761	0.369	2.13352e-64	1	Rbpj
Nr4a2	2.17668e-67	0.695808	0.656	0.265	4.33181e-63	1	Nr4a2
Anxa2	2.0767e-65	0.569742	0.908	0.586	4.13285e-61	1	Anxa2
Klre1	4.73528e-65	0.601503	0.493	0.162	9.42367e-61	1	Klre1
Eif3h	7.08762e-65	0.404538	0.988	0.906	1.41051e-60	1	Eif3h
Cd200	1.79531e-63	0.650937	0.539	0.195	3.57284e-59	1	Cd200
Cnih2	2.75221e-63	0.518414	0.35	0.063	5.47718e-59	1	Cnih2
Plek	3.69701e-62	0.467908	0.493	0.154	7.35742e-58	1	Plek
Bdh2	2.30338e-61	0.668023	0.292	0.018	4.58396e-57	1	Bdh2
Fkbp1a	1.33082e-60	0.49828	0.92	0.67	2.64847e-56	1	Fkbp1a
Stat3	5.38179e-60	0.568648	0.841	0.534	1.07103e-55	1	Stat3
Spry1	1.10866e-59	0.569295	0.382	0.085	2.20635e-55	1	Spry1
Igfbp7	1.16099e-56	0.716883	0.349	0.05	2.31049e-52	1	Igfbp7
Dusp41	1.40329e-56	0.537813	0.691	0.353	2.79268e-52	1	Dusp4
Fam162a	2.77232e-56	0.568536	0.727	0.384	5.51718e-52	1	Fam162a
Sdf41	2.16095e-53	0.48168	0.949	0.789	4.30051e-49	1	Sdf4
Ptprs	6.95148e-53	0.444799	0.371	0.078	1.38341e-48	1	Ptprs
Alcam	7.60947e-53	0.501901	0.535	0.196	1.51436e-48	1	Alcam
Ms4a4b	1.36169e-52	0.409018	0.978	0.809	2.70989e-48	1	Ms4a4b
Ms4a4c	1.75661e-52	0.561702	0.446	0.139	3.49583e-48	1	Ms4a4c
Serpinb9	2.09002e-52	0.688074	0.578	0.238	4.15934e-48	1	Serpinb9
Ier3	2.41252e-52	0.714763	0.466	0.171	4.80115e-48	1	Ier3
Ifng	1.69408e-51	1.83374	0.584	0.258	3.37139e-47	1	Ifng
Serpinb6a	2.52958e-49	0.457313	0.661	0.354	5.03412e-45	1	Serpinb6a
Dusp2	1.14432e-48	0.543158	0.775	0.474	2.27731e-44	1	Dusp2
B4galnt1	6.10874e-48	0.42047	0.73	0.419	1.2157e-43	1	B4galnt1
Zbtb32	1.59054e-47	0.549371	0.452	0.156	3.16534e-43	1	Zbtb32
Tmem171	7.61152e-47	0.435975	0.274	0.042	1.51477e-42	1	Tmem171
Plscr1	1.09182e-45	0.43685	0.479	0.197	2.17283e-41	1	Plscr1
Zeb2	6.47057e-44	0.391868	0.33	0.074	1.28771e-39	1	Zeb2
Ccdc50	6.92061e-44	0.398443	0.566	0.255	1.37727e-39	1	Ccdc50
Pou2f2	1.41237e-43	0.550574	0.503	0.172	2.81075e-39	1	Pou2f2
Il18r1	1.87662e-43	0.425492	0.732	0.426	3.73466e-39	1	Il18r1
Sub1	2.98313e-43	0.399992	0.968	0.86	5.93672e-39	1	Sub1
Gem	1.42959e-42	0.525409	0.583	0.302	2.84503e-38	1	Gem
Cd3d	3.77159e-41	0.28864	0.987	0.946	7.50584e-37	1	Cd3d
Ece1	5.17287e-41	0.377768	0.403	0.144	1.02945e-36	1	Ece1
Litaf	5.94338e-41	0.397204	0.601	0.279	1.18279e-36	1	Litaf
Xdh	3.38232e-40	0.309648	0.277	0.062	6.73115e-36	1	Xdh
Sat11	3.66917e-40	0.442954	0.835	0.61	7.30201e-36	1	Sat1
Wipf1	1.95654e-39	0.402698	0.729	0.441	3.89371e-35	1	Wipf1
Crtam	2.44058e-39	0.625776	0.324	0.102	4.85699e-35	1	Crtam
Mdfic1	2.92929e-38	0.349622	0.635	0.339	5.82958e-34	1	Mdfic
Gapdh1	3.33621e-38	0.362446	0.997	0.946	6.6394e-34	1	Gapdh
Prelid2	2.99025e-37	0.457028	0.585	0.279	5.9509e-33	1	Prelid2
Itgal	1.09817e-36	0.35391	0.768	0.491	2.18547e-32	1	Itgal
Csf1	1.10699e-36	0.370377	0.439	0.169	2.20301e-32	1	Csf1
Ubash3b	1.22754e-36	0.417806	0.46	0.188	2.44293e-32	1	Ubash3b
Fhl2	1.36887e-36	0.478987	0.392	0.114	2.72418e-32	1	Fhl2
Acot7	2.73478e-36	0.305174	0.601	0.348	5.44249e-32	1	Acot7
Nfat5	4.73327e-36	0.374822	0.486	0.21	9.41969e-32	1	Nfat5
Kif15	1.1168e-35	0.398837	0.349	0.111	2.22255e-31	1	Kif15
Il12rb2	3.31991e-35	0.362153	0.383	0.143	6.60695e-31	1	Il12rb2
Serpine2	6.38342e-35	0.524993	0.237	0.039	1.27036e-30	1	Serpine2
Sh2d2a	9.19457e-35	0.416497	0.817	0.528	1.82981e-30	1	Sh2d2a
Sp140	1.66082e-34	0.320264	0.563	0.317	3.30519e-30	1	Sp140
Ndfip11	1.82579e-34	0.313497	0.833	0.582	3.63351e-30	1	Ndfip1
Fam213a	7.23275e-34	0.358402	0.332	0.117	1.43939e-29	1	Fam213a
Dap	8.14077e-34	0.417568	0.693	0.418	1.62009e-29	1	Dap
Id2	2.20516e-33	0.420615	0.91	0.696	4.38849e-29	1	Id2
Acot9	2.3503e-33	0.30974	0.518	0.272	4.67734e-29	1	Acot9
Runx2	4.81371e-33	0.338731	0.62	0.337	9.57977e-29	1	Runx2
Gm17745	5.7254e-33	0.346602	0.325	0.106	1.13941e-28	1	Gm17745
Thy1	8.24413e-33	0.392419	0.967	0.782	1.64066e-28	1	Thy1
Crabp2	1.03769e-32	0.51541	0.158	0.013	2.0651e-28	1	Crabp2
Anxa5	1.16585e-32	0.365099	0.656	0.4	2.32015e-28	1	Anxa5
Bsg	1.55737e-32	0.303479	0.814	0.575	3.09933e-28	1	Bsg
Ube2a	2.75413e-32	0.287437	0.647	0.417	5.481e-28	1	Ube2a
Fasl	4.0753e-32	0.360326	0.481	0.2	8.11025e-28	1	Fasl
Smim3	4.49764e-32	0.30339	0.331	0.117	8.95075e-28	1	Smim3
Ctsw	4.84764e-32	0.323205	0.764	0.477	9.64728e-28	1	Ctsw
Ifitm1	6.60198e-32	0.680771	0.42	0.195	1.31386e-27	1	Ifitm1
Gpr68	1.25317e-31	0.323307	0.452	0.196	2.49392e-27	1	Gpr68
Ccl4	2.45303e-31	1.94764	0.58	0.37	4.88177e-27	1	Ccl4
Ccl1	3.53948e-31	1.40456	0.212	0.042	7.04391e-27	1	Ccl1
Cox17	3.74006e-31	0.388982	0.86	0.609	7.4431e-27	1	Cox17
Pdcd1lg2	5.65356e-31	0.290243	0.428	0.197	1.12511e-26	1	Pdcd1lg2
Phactr2	8.29914e-31	0.309308	0.314	0.106	1.65161e-26	1	Phactr2
Dusp6	9.56311e-31	0.297186	0.292	0.105	1.90315e-26	1	Dusp6
Zyx	6.738e-30	0.302798	0.697	0.419	1.34093e-25	1	Zyx
Arl4d	8.33987e-30	0.324374	0.241	0.051	1.65972e-25	1	Arl4d
Plac8	9.1715e-30	0.700652	0.523	0.285	1.82522e-25	1	Plac8
Bach2	7.10888e-29	0.282227	0.301	0.089	1.41474e-24	1	Bach2
Havcr2	8.54477e-29	0.53607	0.332	0.15	1.70049e-24	1	Havcr2
Cblb	1.5478e-28	0.252204	0.588	0.351	3.08028e-24	1	Cblb
Pik3r1	6.28024e-28	0.282276	0.55	0.338	1.24983e-23	1	Pik3r1
Tpi1	2.85431e-27	0.38494	0.817	0.547	5.68036e-23	1	Tpi1
Atf3	2.86024e-27	0.309473	0.252	0.084	5.69216e-23	1	Atf3
Gzme	3.48252e-27	1.03447	0.196	0.053	6.93055e-23	1	Gzme
Pgk1	6.41268e-27	0.318487	0.907	0.691	1.27619e-22	1	Pgk1
Arap2	6.79087e-27	0.266477	0.434	0.214	1.35145e-22	1	Arap2
Orai1	7.98784e-27	0.335641	0.673	0.422	1.58966e-22	1	Orai1
Nrn1	8.83779e-27	0.658018	0.315	0.114	1.75881e-22	1	Nrn1
Sytl3	9.67571e-27	0.386747	0.364	0.133	1.92556e-22	1	Sytl3
Elk3	1.01964e-26	0.311929	0.483	0.24	2.02919e-22	1	Elk3
Cx3cr1	1.52201e-26	0.639941	0.29	0.086	3.02896e-22	1	Cx3cr1
Ifitm2	1.72873e-26	0.334979	0.555	0.329	3.44034e-22	1	Ifitm2
Xcl1	1.95316e-26	1.26787	0.376	0.168	3.88699e-22	1	Xcl1
Nabp1	2.76943e-26	0.321996	0.647	0.401	5.51144e-22	1	Nabp1
Ptpn22	2.94451e-26	0.255235	0.706	0.458	5.85987e-22	1	Ptpn22
Zap70	4.42787e-26	0.356966	0.726	0.461	8.81191e-22	1	Zap70
Slc2a3	5.38959e-26	0.258324	0.392	0.197	1.07258e-21	1	Slc2a3
Nr4a3	2.39146e-25	0.314094	0.339	0.157	4.75925e-21	1	Nr4a3
Ier5l	3.69168e-25	0.319612	0.36	0.179	7.3468e-21	1	Ier5l
Impa2	3.85126e-25	0.310013	0.468	0.263	7.6644e-21	1	Impa2
Gzmd	6.43961e-25	1.25706	0.217	0.082	1.28155e-20	1	Gzmd
Cd44	1.89087e-24	0.253731	0.599	0.37	3.76303e-20	1	Cd44
S100a4	3.40746e-24	0.314969	0.85	0.675	6.78118e-20	1	S100a4
Ccl3	7.94665e-24	2.10147	0.42	0.234	1.58146e-19	1	Ccl3
Chic2	8.44323e-24	0.254934	0.756	0.526	1.68029e-19	1	Chic2
Gldc	1.30667e-23	0.26571	0.186	0.053	2.6004e-19	1	Gldc
Styk1	1.49138e-23	0.254318	0.214	0.072	2.96799e-19	1	Styk1
Uhrf2	1.49355e-23	0.374164	0.685	0.45	2.97231e-19	1	Uhrf2
Msi21	3.17159e-23	0.275577	0.624	0.368	6.31178e-19	1	Msi2
Gabarapl1	5.58956e-23	0.261012	0.339	0.15	1.11238e-18	1	Gabarapl1
Galnt3	9.01144e-23	0.262287	0.254	0.078	1.79337e-18	1	Galnt3
Tg	3.77949e-22	0.267758	0.201	0.051	7.52156e-18	1	Tg
Gpr171	9.04326e-22	0.285931	0.552	0.31	1.7997e-17	1	Gpr171
Tes	1.916e-21	0.27711	0.69	0.452	3.81303e-17	1	Tes
Mrps6	2.00071e-21	0.28599	0.486	0.257	3.98161e-17	1	Mrps6
Tgfb1	3.66804e-21	0.301847	0.649	0.427	7.29977e-17	1	Tgfb1
Ptpn6	1.18081e-20	0.275093	0.555	0.311	2.34993e-16	1	Ptpn6
Spry2	2.80227e-20	0.299158	0.224	0.081	5.57679e-16	1	Spry2
Btg2	3.14877e-20	0.257237	0.89	0.705	6.26636e-16	1	Btg2
Creb3l2	3.59599e-20	0.269008	0.218	0.054	7.15638e-16	1	Creb3l2
Pold4	4.51852e-20	0.309398	0.66	0.428	8.9923e-16	1	Pold4
Hacd2	7.32069e-20	0.310751	0.4	0.194	1.45689e-15	1	Hacd2
Mir155hg	3.10697e-19	0.263634	0.286	0.11	6.18319e-15	1	Mir155hg
Serpinb9b	3.49069e-19	0.527934	0.157	0.03	6.94682e-15	1	Serpinb9b
Ap3b1	4.49793e-17	0.298478	0.489	0.299	8.95133e-13	1	Ap3b1
Spp1	8.96195e-17	0.434412	0.6	0.41	1.78352e-12	1	Spp1
Cenpa	2.25806e-16	0.255144	0.587	0.326	4.49376e-12	1	Cenpa
Glud1	8.10504e-16	0.292297	0.653	0.424	1.61298e-11	1	Glud1
Ccr7	8.56189e-16	0.658874	0.371	0.218	1.7039e-11	1	Ccr7
Hilpda1	9.45841e-16	0.323511	0.552	0.381	1.88232e-11	1	Hilpda
Nfkbib	3.42436e-15	0.255298	0.451	0.269	6.81482e-11	1	Nfkbib
Tmem126a	4.42439e-15	0.26797	0.54	0.331	8.80498e-11	1	Tmem126a
Gdi2	5.2179e-15	0.308488	0.857	0.66	1.03841e-10	1	Gdi2
Gm156	6.25448e-15	0.336796	0.107	0.032	1.2447e-10	1	Gm156
Nol7	2.19516e-14	0.266631	0.87	0.675	4.36858e-10	1	Nol7
Dbi	2.48216e-14	0.387416	0.698	0.479	4.93975e-10	1	Dbi
Hivep3	3.56877e-13	0.253229	0.227	0.091	7.10221e-09	1	Hivep3
Eno1	1.30361e-12	0.259649	0.89	0.724	2.59432e-08	1	Eno1
Mif	1.94599e-12	0.283762	0.891	0.728	3.87271e-08	1	Mif
Ramp3	1.57673e-70	1.4101	0.448	0.082	3.13785e-66	2	Ramp3
Rps27	6.62006e-67	0.345466	0.999	0.998	1.31746e-62	2	Rps27
Emb	2.58068e-64	0.80945	0.653	0.368	5.1358e-60	2	Emb
Cd41	6.62977e-52	0.705422	0.502	0.219	1.31939e-47	2	Cd4
Tnfsf8	3.05653e-51	1.24442	0.358	0.088	6.0828e-47	2	Tnfsf8
Malat11	2.55935e-45	0.357126	1	0.998	5.09336e-41	2	Malat1
Cd40lg	6.33537e-42	0.649801	0.305	0.07	1.2608e-37	2	Cd40lg
Tbc1d4	1.52518e-36	0.757011	0.304	0.067	3.03527e-32	2	Tbc1d4
Btg1	1.74879e-36	0.468882	0.973	0.967	3.48026e-32	2	Btg1
Itgb1	2.2423e-34	0.777988	0.619	0.468	4.4624e-30	2	Itgb1
Hspa1b	2.46304e-31	0.89774	0.74	0.629	4.9017e-27	2	Hspa1b
mt-Rnr1	3.13664e-31	0.308458	0.976	0.973	6.24223e-27	2	mt-Rnr1
Klf2	1.29601e-28	0.827775	0.66	0.481	2.57918e-24	2	Klf2
Ubb	7.04687e-27	0.448684	0.992	0.99	1.4024e-22	2	Ubb
Hspa1a	1.50938e-26	0.990531	0.723	0.615	3.00382e-22	2	Hspa1a
Ddx51	2.27734e-26	0.278373	0.959	0.97	4.53214e-22	2	Ddx5
S1pr1	1.18932e-25	0.558622	0.379	0.197	2.36686e-21	2	S1pr1
Zfp36l2	2.87895e-25	0.634712	0.711	0.638	5.7294e-21	2	Zfp36l2
Klf61	5.05607e-25	0.668981	0.77	0.704	1.00621e-20	2	Klf6
Tcf7	5.68901e-25	0.508714	0.41	0.212	1.13217e-20	2	Tcf7
Btg21	1.52907e-23	0.513094	0.799	0.719	3.043e-19	2	Btg2
mt-Rnr21	1.94349e-22	0.252831	1	0.998	3.86775e-18	2	mt-Rnr2
Junb	1.00515e-21	0.549995	0.847	0.818	2.00035e-17	2	Junb
Fyb1	3.66093e-21	0.357406	0.834	0.817	7.28561e-17	2	Fyb
Il7r1	3.79095e-21	0.643956	0.629	0.529	7.54438e-17	2	Il7r
Gm8995	5.33556e-21	0.369425	0.814	0.792	1.06183e-16	2	Gm8995
Gna131	6.48514e-21	0.561429	0.647	0.563	1.29061e-16	2	Gna13
Slamf6	2.07005e-20	0.596457	0.372	0.209	4.11961e-16	2	Slamf6
Vps37b	3.02298e-20	0.511307	0.656	0.596	6.01604e-16	2	Vps37b
Rabac1	9.03636e-20	0.342908	0.729	0.722	1.79833e-15	2	Rabac1
Cd531	1.25408e-19	0.29979	0.887	0.897	2.49574e-15	2	Cd53
Rps27rt	1.63649e-19	0.292998	0.838	0.848	3.25678e-15	2	Rps27rt
Irf2bp2	1.00659e-17	0.48906	0.458	0.354	2.00322e-13	2	Irf2bp2
Stk17b	1.25355e-17	0.342858	0.833	0.846	2.49468e-13	2	Stk17b
Cytip1	7.61992e-16	0.295213	0.813	0.826	1.51644e-11	2	Cytip
Neurl3	5.00425e-15	0.608266	0.441	0.379	9.95896e-11	2	Neurl3
Nr3c11	5.62514e-15	0.436467	0.453	0.41	1.11946e-10	2	Nr3c1
Gm45153	2.44506e-14	0.307855	0.173	0.094	4.86591e-10	2	Gm45153
Esm1	2.98124e-14	0.45316	0.12	0.03	5.93296e-10	2	Esm1
Ifngr11	3.55344e-14	0.273755	0.77	0.773	7.0717e-10	2	Ifngr1
Cd84	3.90968e-14	0.372199	0.465	0.422	7.78065e-10	2	Cd84
Krt83	7.5923e-14	0.361897	0.118	0.034	1.51094e-09	2	Krt83
Ier5	1.36717e-13	0.434812	0.596	0.558	2.72081e-09	2	Ier5
Slfn2	2.47687e-13	0.40924	0.685	0.64	4.92921e-09	2	Slfn2
Fam102a	2.76372e-13	0.382213	0.397	0.321	5.50007e-09	2	Fam102a
Tmem64	2.9344e-13	0.455433	0.249	0.144	5.83975e-09	2	Tmem64
Fos	5.2663e-13	0.520664	0.4	0.313	1.04805e-08	2	Fos
Tnfaip31	1.22847e-12	0.426104	0.576	0.533	2.44478e-08	2	Tnfaip3
Nsd3	1.0166e-11	0.335283	0.619	0.625	2.02313e-07	2	Nsd3
Lgals7	2.51038e-11	0.507198	0.117	0.041	4.99591e-07	2	Lgals7
Socs3	3.39341e-11	0.553817	0.312	0.182	6.75323e-07	2	Socs3
Mcl11	3.49809e-11	0.395828	0.794	0.812	6.96155e-07	2	Mcl1
Ubc	5.49064e-11	0.499339	0.665	0.652	1.09269e-06	2	Ubc
Scg5	1.73022e-10	0.254264	0.215	0.128	3.44331e-06	2	Scg5
Itga4	2.1118e-10	0.474048	0.323	0.233	4.20269e-06	2	Itga4
Klf3	2.15782e-10	0.299219	0.225	0.123	4.29428e-06	2	Klf3
Tnfsf11	2.44064e-10	0.462788	0.196	0.102	4.85712e-06	2	Tnfsf11
Cd28	2.91426e-10	0.383077	0.703	0.672	5.79966e-06	2	Cd28
Dnajb1	3.96261e-10	0.846439	0.575	0.515	7.88599e-06	2	Dnajb1
Slfn1	6.50704e-10	0.367657	0.395	0.299	1.29497e-05	2	Slfn1
Ppp1r15a	4.42504e-09	0.323629	0.511	0.491	8.80627e-05	2	Ppp1r15a
Pja1	6.28745e-09	0.371271	0.246	0.173	0.000125127	2	Pja1
Jund	1.38703e-08	0.277819	0.929	0.944	0.000276032	2	Jund
Ar	1.53693e-08	0.416369	0.229	0.164	0.000305864	2	Ar
Gm26825	2.4514e-08	0.516537	0.588	0.551	0.000487854	2	Gm26825
Ets11	2.72323e-08	0.259329	0.805	0.837	0.000541949	2	Ets1
Dgka	5.73543e-08	0.312189	0.418	0.367	0.00114141	2	Dgka
Gpr183	9.42703e-08	0.472413	0.47	0.438	0.00187607	2	Gpr183
Rora1	1.21485e-07	0.353841	0.479	0.405	0.00241767	2	Rora
Dusp10	1.43773e-07	0.466012	0.329	0.243	0.00286122	2	Dusp10
Gpr132	1.45424e-07	0.347952	0.364	0.291	0.00289407	2	Gpr132
Cxcr41	1.4777e-07	0.398953	0.262	0.171	0.00294078	2	Cxcr4
Crbn1	2.94438e-07	0.387546	0.415	0.396	0.00585961	2	Crbn
Pde4b	3.18081e-07	0.358005	0.334	0.267	0.00633013	2	Pde4b
C230096K16Rik	7.38569e-07	0.251003	0.171	0.091	0.0146983	2	C230096K16Rik
Tnfaip81	7.942e-07	0.325492	0.524	0.53	0.0158054	2	Tnfaip8
Dnaja1	8.34941e-07	0.460799	0.693	0.749	0.0166162	2	Dnaja1
Fosl2	8.80266e-07	0.451768	0.415	0.358	0.0175182	2	Fosl2
Slc4a7	9.68262e-07	0.297806	0.243	0.193	0.0192694	2	Slc4a7
Bcl11b	1.47513e-06	0.308531	0.563	0.549	0.0293565	2	Bcl11b
Ctse	2.33991e-06	0.26645	0.365	0.339	0.0465666	2	Ctse
P2ry101	3.55524e-06	0.315525	0.446	0.423	0.0707529	2	P2ry10
Ms4a6c	5.524e-06	0.322022	0.146	0.074	0.109933	2	Ms4a6c
Prkca	5.92282e-06	0.316592	0.427	0.432	0.11787	2	Prkca
Hsp90aa1	7.43694e-06	0.500563	0.834	0.843	0.148003	2	Hsp90aa1
Stat4	7.44728e-06	0.263068	0.322	0.299	0.148208	2	Stat4
Paxbp1	9.62594e-06	0.2991	0.23	0.193	0.191566	2	Paxbp1
Arid5a	9.68596e-06	0.335421	0.299	0.263	0.19276	2	Arid5a
Gramd3	1.42024e-05	0.3971	0.418	0.356	0.282641	2	Gramd3
Trps1	1.48946e-05	0.387391	0.27	0.213	0.296418	2	Trps1
Hivep2	1.84807e-05	0.312928	0.279	0.229	0.367785	2	Hivep2
Sesn3	4.64311e-05	0.329389	0.352	0.327	0.924025	2	Sesn3
Cd82	4.69676e-05	0.25084	0.494	0.537	0.934701	2	Cd82
Tiam11	4.94985e-05	0.253934	0.188	0.119	0.985069	2	Tiam1
Gata31	6.96788e-05	0.436931	0.409	0.387	1	2	Gata3
Crem1	8.37434e-05	0.342335	0.524	0.531	1	2	Crem
Pou2f21	0.00011586	0.255686	0.237	0.214	1	2	Pou2f2
Zcchc11	0.000158052	0.289076	0.477	0.495	1	2	Zcchc11
Fam107b	0.000293924	0.264344	0.572	0.619	1	2	Fam107b
Kdm7a	0.000306276	0.313873	0.325	0.294	1	2	Kdm7a
Clint1	0.000316245	0.285903	0.435	0.437	1	2	Clint1
Rgs2	0.000417177	0.347503	0.465	0.483	1	2	Rgs2
Txnip	0.00107602	0.32009	0.538	0.537	1	2	Txnip
Dgat11	0.00111051	0.360837	0.273	0.213	1	2	Dgat1
Jun	0.00184803	0.334977	0.61	0.645	1	2	Jun
Rnf1251	0.0019392	0.335507	0.381	0.347	1	2	Rnf125
Celf2	0.00215445	0.276222	0.632	0.672	1	2	Celf2
Adk	0.00302822	0.327336	0.269	0.236	1	2	Adk
Jak2	0.00372275	0.292482	0.244	0.201	1	2	Jak2
Il18r11	0.00401384	0.256592	0.45	0.47	1	2	Il18r1
Gm12840	0.00516464	0.306086	0.308	0.261	1	2	Gm12840
Ifitm3	0.00577942	0.491916	0.29	0.28	1	2	Ifitm3
Cnot6l	0.00717603	0.29461	0.495	0.519	1	2	Cnot6l
Atf31	0.00911399	0.317695	0.127	0.104	1	2	Atf3
Rps29	7.93716e-283	0.854543	1	0.997	1.57957e-278	3	Rps29
Rplp1	4.66938e-264	0.726602	1	0.998	9.29254e-260	3	Rplp1
Rps271	2.25266e-262	0.760276	1	0.998	4.48302e-258	3	Rps27
Rps16	1.05758e-261	0.689799	1	0.997	2.10469e-257	3	Rps16
Rps24	1.64609e-256	0.653341	1	0.998	3.27588e-252	3	Rps24
Rpl12	2.27819e-247	0.752264	1	0.991	4.53383e-243	3	Rpl12
Rps3a1	4.26242e-237	0.658715	1	0.994	8.48265e-233	3	Rps3a1
Rps19	1.62993e-215	0.716511	0.999	0.987	3.24373e-211	3	Rps19
Rpl8	1.64429e-209	0.639148	1	0.99	3.2723e-205	3	Rpl8
Rps21	4.51133e-207	0.550858	1	0.997	8.978e-203	3	Rps21
Rps20	1.84927e-199	0.66684	1	0.993	3.68024e-195	3	Rps20
Rps4x	1.45928e-195	0.523923	1	0.996	2.90412e-191	3	Rps4x
Rps8	1.16538e-189	0.587065	1	0.995	2.31921e-185	3	Rps8
Rps28	3.5608e-188	0.699209	0.997	0.976	7.08635e-184	3	Rps28
Lef1	9.43112e-188	1.46567	0.788	0.195	1.87689e-183	3	Lef1
Rps7	3.30349e-186	0.59014	0.999	0.99	6.57428e-182	3	Rps7
Rpl9	2.92071e-184	0.484958	1	0.996	5.81251e-180	3	Rpl9
Rps27a	6.54682e-167	0.463671	1	0.995	1.30288e-162	3	Rps27a
Rps10	2.27575e-166	0.48161	1	0.994	4.52897e-162	3	Rps10
Rpl13	2.59459e-162	0.504349	1	0.996	5.16349e-158	3	Rpl13
Rps15	7.28886e-162	0.52369	0.999	0.989	1.45056e-157	3	Rps15
Rplp2	2.3645e-157	0.452631	0.999	0.995	4.70558e-153	3	Rplp2
Rpl5	2.59935e-156	0.622433	0.995	0.963	5.17297e-152	3	Rpl5
Rpl19	4.49611e-156	0.3976	0.999	0.998	8.9477e-152	3	Rpl19
Rps9	1.1267e-148	0.423675	1	0.994	2.24225e-144	3	Rps9
Rpl17	5.33004e-144	0.409643	0.999	0.995	1.06073e-139	3	Rpl17
Rpl36a	4.87012e-143	0.551545	0.997	0.97	9.69203e-139	3	Rpl36a
Rps3	4.20432e-142	0.396355	1	0.996	8.36702e-138	3	Rps3
Rps5	3.22195e-139	0.46032	0.999	0.995	6.41201e-135	3	Rps5
Rpl21	5.09202e-138	0.482343	0.999	0.987	1.01336e-133	3	Rpl21
Tpt1	1.42448e-136	0.347052	1	0.999	2.83487e-132	3	Tpt1
Rps14	3.27096e-133	0.38491	1	0.996	6.50953e-129	3	Rps14
mt-Cytb	2.31802e-130	0.548153	0.998	0.983	4.6131e-126	3	mt-Cytb
Rpl23	8.1918e-130	0.401942	1	0.998	1.63025e-125	3	Rpl23
Rpl35a	8.68787e-130	0.624828	0.989	0.924	1.72897e-125	3	Rpl35a
Rps18	4.07349e-122	0.492887	0.999	0.982	8.10666e-118	3	Rps18
Rps23	4.36194e-118	0.357523	1	0.995	8.6807e-114	3	Rps23
Rps25	4.69097e-118	0.53331	0.99	0.946	9.3355e-114	3	Rps25
mt-Nd2	5.0856e-115	0.593375	0.99	0.946	1.01209e-110	3	mt-Nd2
Rpl36	6.06434e-114	0.357607	1	0.993	1.20686e-109	3	Rpl36
Tcf71	6.20254e-113	0.977536	0.674	0.175	1.23437e-108	3	Tcf7
Igfbp4	1.23494e-111	1.57698	0.46	0.013	2.45766e-107	3	Igfbp4
Rpsa	5.64213e-110	0.397424	1	0.997	1.12284e-105	3	Rpsa
Rpl18a	5.35017e-108	0.347898	1	0.996	1.06474e-103	3	Rpl18a
Rpl30	2.62819e-107	0.510112	0.996	0.978	5.23035e-103	3	Rpl30
Rpl35	4.23025e-106	0.487708	0.997	0.964	8.41862e-102	3	Rpl35
Rps13	7.43104e-104	0.327843	1	0.996	1.47885e-99	3	Rps13
Rpl7	1.09343e-102	0.403446	0.996	0.979	2.17603e-98	3	Rpl7
Rpl39	5.86647e-98	0.323864	0.999	0.996	1.16749e-93	3	Rpl39
Rpl10a	5.89448e-98	0.428037	0.998	0.971	1.17306e-93	3	Rpl10a
Rpl32	1.83185e-96	0.345135	1	0.997	3.64556e-92	3	Rpl32
mt-Nd4	2.06271e-96	0.492772	0.988	0.954	4.105e-92	3	mt-Nd4
Rpl14	2.16327e-96	0.453563	0.998	0.983	4.30513e-92	3	Rpl14
Actn1	6.43426e-95	0.933694	0.48	0.088	1.28048e-90	3	Actn1
Rps27rt1	1.15208e-94	0.654397	0.929	0.835	2.29275e-90	3	Rps27rt
Rplp0	9.4253e-94	0.403928	0.997	0.986	1.87573e-89	3	Rplp0
Rpl18	9.99882e-91	0.360284	1	0.99	1.98986e-86	3	Rpl18
Sell1	5.20947e-90	0.8065	0.671	0.23	1.03674e-85	3	Sell
Rpl27a	7.57233e-88	0.377366	0.992	0.973	1.50697e-83	3	Rpl27a
Smc6	1.21731e-85	0.885805	0.833	0.616	2.42257e-81	3	Smc6
Rps15a	3.56032e-85	0.273567	1	0.997	7.0854e-81	3	Rps15a
Rpl22l1	5.25029e-85	0.540055	0.967	0.908	1.04486e-80	3	Rpl22l1
Rpl37	9.76007e-85	0.319309	0.999	0.995	1.94235e-80	3	Rpl37
S1pr11	1.92563e-84	0.820659	0.605	0.165	3.83219e-80	3	S1pr1
Gm15772	3.5837e-84	0.378877	0.995	0.974	7.13192e-80	3	Gm15772
Rpl6	3.8079e-84	0.338928	1	0.991	7.5781e-80	3	Rpl6
Klf21	3.18689e-77	0.615763	0.85	0.454	6.34223e-73	3	Klf2
Rpl37a	5.57662e-77	0.28095	1	0.997	1.1098e-72	3	Rpl37a
Limd2	1.20599e-76	0.567877	0.913	0.799	2.40004e-72	3	Limd2
Rack1	4.62315e-73	0.32347	0.999	0.986	9.20052e-69	3	Rack1
Rpl11	1.14013e-71	0.270255	0.999	0.996	2.26898e-67	3	Rpl11
Rps26	1.32827e-71	0.350412	0.998	0.985	2.64339e-67	3	Rps26
Gm8730	3.81765e-70	0.398322	0.989	0.952	7.59751e-66	3	Gm8730
Rpl38	5.74504e-70	0.2832	0.998	0.995	1.14332e-65	3	Rpl38
Pik3ip1	1.52577e-69	0.689834	0.384	0.081	3.03643e-65	3	Pik3ip1
Dapl1	2.49369e-67	1.23913	0.382	0.042	4.96269e-63	3	Dapl1
Rps6	2.6193e-66	0.386307	0.986	0.939	5.21268e-62	3	Rps6
Eef1b2	5.29833e-66	0.395039	0.992	0.964	1.05442e-61	3	Eef1b2
Ccr71	1.50364e-64	0.624114	0.564	0.192	2.99239e-60	3	Ccr7
mt-Nd1	2.55872e-61	0.384784	0.987	0.962	5.0921e-57	3	mt-Nd1
Rpl10	4.26141e-59	0.335537	0.996	0.975	8.48062e-55	3	Rpl10
Il6ra	1.71993e-58	0.691238	0.372	0.059	3.42283e-54	3	Il6ra
Rpl3	2.51667e-57	0.281386	0.998	0.989	5.00842e-53	3	Rpl3
Foxp1	2.64453e-56	0.702234	0.556	0.296	5.26287e-52	3	Foxp1
Rflnb	6.99662e-56	0.747194	0.342	0.042	1.3924e-51	3	Rflnb
Gm10260	1.12292e-53	0.435602	0.97	0.92	2.23473e-49	3	Gm10260
Satb1	1.98519e-53	0.560882	0.76	0.588	3.95072e-49	3	Satb1
Gm89951	7.22109e-50	0.50995	0.878	0.783	1.43707e-45	3	Gm8995
Npc21	7.50169e-50	0.382101	0.898	0.823	1.49291e-45	3	Npc2
Ripor2	4.24169e-49	0.571691	0.443	0.17	8.44138e-45	3	Ripor2
Rasgrp2	2.85639e-48	0.645304	0.374	0.097	5.6845e-44	3	Rasgrp2
Gm11346	1.3364e-47	0.53326	0.287	0.066	2.65956e-43	3	Gm11346
Rpl22	2.353e-46	0.266385	0.997	0.987	4.68271e-42	3	Rpl22
Atp1b1	1.10764e-44	0.543854	0.265	0.037	2.20431e-40	3	Atp1b1
Cox7a2l	1.87737e-43	0.3969	0.927	0.862	3.73615e-39	3	Cox7a2l
mt-Nd5	6.33231e-43	0.440028	0.855	0.751	1.26019e-38	3	mt-Nd5
Hmgn1	1.75283e-42	0.599081	0.52	0.255	3.4883e-38	3	Hmgn1
Rps2	2.6194e-41	0.286393	0.995	0.964	5.21286e-37	3	Rps2
Rps17	3.86229e-41	0.362904	0.971	0.893	7.68635e-37	3	Rps17
Dgka1	1.11937e-40	0.565943	0.568	0.346	2.22765e-36	3	Dgka
Rpl28	1.54564e-40	0.280891	0.999	0.981	3.07598e-36	3	Rpl28
Cmah	2.00755e-40	0.580978	0.334	0.089	3.99523e-36	3	Cmah
Arl4c	2.45989e-40	0.570772	0.611	0.399	4.89542e-36	3	Arl4c
Atp1b3	2.60468e-40	0.532406	0.702	0.573	5.18357e-36	3	Atp1b3
Rgs101	2.45626e-39	0.536539	0.606	0.361	4.88821e-35	3	Rgs10
Rpl15	1.47776e-37	0.370688	0.934	0.862	2.94088e-33	3	Rpl15
Dtx1	5.8218e-37	0.434723	0.191	0.024	1.1586e-32	3	Dtx1
A930005H10Rik	8.85199e-36	0.528017	0.319	0.107	1.76163e-31	3	A930005H10Rik
Treml2	1.53432e-35	0.379614	0.169	0.018	3.05345e-31	3	Treml2
Rapgef6	1.23157e-34	0.449275	0.7	0.6	2.45094e-30	3	Rapgef6
Ablim1	8.75626e-34	0.350888	0.738	0.678	1.74258e-29	3	Ablim1
Pdlim4	3.05117e-32	0.460183	0.16	0.003	6.07213e-28	3	Pdlim4
Klf31	9.33301e-32	0.465653	0.329	0.108	1.85736e-27	3	Klf3
Rps12	5.16952e-31	0.251798	0.999	0.995	1.02879e-26	3	Rps12
Evl	1.04583e-30	0.486465	0.541	0.359	2.0813e-26	3	Evl
Gm7536	2.58957e-29	0.346773	0.778	0.724	5.15351e-25	3	Gm7536
Gm42449	4.39845e-29	0.39703	0.19	0.035	8.75336e-25	3	Gm42449
Sh3bp5	8.42329e-29	0.374293	0.257	0.111	1.67632e-24	3	Sh3bp5
Rpl31	1.92537e-28	0.321827	0.917	0.843	3.83168e-24	3	Rpl31
Gm14303	1.10096e-27	0.529682	0.576	0.432	2.19102e-23	3	Gm14303
C230085N15Rik	3.70474e-27	0.529884	0.427	0.24	7.3728e-23	3	C230085N15Rik
Bcl11b1	1.02219e-26	0.51066	0.684	0.532	2.03426e-22	3	Bcl11b
Add3	9.7771e-26	0.478966	0.444	0.297	1.94574e-21	3	Add3
Gm6472	1.1587e-25	0.419393	0.709	0.633	2.30592e-21	3	Gm6472
Gm128401	6.03109e-25	0.716189	0.423	0.245	1.20025e-20	3	Gm12840
Tdrp	2.18734e-24	0.370535	0.18	0.027	4.35303e-20	3	Tdrp
Gm20696	1.7673e-23	0.3109	0.145	0.024	3.51711e-19	3	Gm20696
Trib2	1.17489e-22	0.464349	0.286	0.109	2.33815e-18	3	Trib2
Uba52	3.55573e-22	0.299491	0.844	0.817	7.07625e-18	3	Uba52
Emb1	3.80943e-22	0.304084	0.584	0.38	7.58115e-18	3	Emb
Klf13	4.06067e-22	0.403419	0.631	0.552	8.08114e-18	3	Klf13
Sidt1	7.31367e-22	0.352385	0.24	0.103	1.45549e-17	3	Sidt1
St8sia6	4.3507e-21	0.328839	0.137	0.014	8.65833e-17	3	St8sia6
Scg51	6.30676e-21	0.381311	0.273	0.12	1.25511e-16	3	Scg5
Kbtbd11	6.87273e-21	0.407662	0.341	0.176	1.36774e-16	3	Kbtbd11
Tsc22d3	1.18156e-20	0.444993	0.473	0.305	2.35142e-16	3	Tsc22d3
Cd55	1.63951e-20	0.310092	0.167	0.058	3.26278e-16	3	Cd55
Gm4332	3.01075e-20	0.442289	0.624	0.539	5.99168e-16	3	Gm4332
Acp5	3.71513e-20	0.415281	0.378	0.237	7.39347e-16	3	Acp5
Ralgps2	3.90535e-20	0.287848	0.181	0.073	7.77204e-16	3	Ralgps2
Pdcd4	2.50196e-19	0.361517	0.668	0.59	4.97914e-15	3	Pdcd4
Scml4	4.50393e-19	0.356864	0.218	0.072	8.96326e-15	3	Scml4
Gm15500	9.75548e-19	0.36892	0.715	0.653	1.94144e-14	3	Gm15500
Rps3a2	1.63725e-18	0.431598	0.635	0.562	3.25829e-14	3	Rps3a2
Txnip1	2.41451e-18	0.291579	0.617	0.526	4.80511e-14	3	Txnip
Rps19-ps6	3.79498e-18	0.400929	0.46	0.387	7.55239e-14	3	Rps19-ps6
Kif1b	3.90607e-18	0.373143	0.267	0.149	7.77348e-14	3	Kif1b
Selenop1	8.54439e-18	0.360456	0.281	0.147	1.70042e-13	3	Selenop
Gm26917	7.45234e-17	0.361563	0.519	0.451	1.48309e-12	3	Gm26917
Snhg12	8.63883e-17	0.316189	0.316	0.234	1.71921e-12	3	Snhg12
E430014B02Rik	1.01716e-16	0.346199	0.241	0.126	2.02425e-12	3	E430014B02Rik
St8sia1	1.09248e-16	0.298256	0.139	0.028	2.17414e-12	3	St8sia1
Stk38	4.20921e-16	0.423797	0.355	0.206	8.37674e-12	3	Stk38
Zbtb20	7.63405e-16	0.350531	0.307	0.198	1.51925e-11	3	Zbtb20
Ifngr2	1.62737e-15	0.298011	0.131	0.029	3.23863e-11	3	Ifngr2
Gm37248	2.29271e-15	0.381322	0.362	0.252	4.56272e-11	3	Gm37248
Gtf2i	3.32864e-15	0.42668	0.365	0.218	6.62432e-11	3	Gtf2i
C230096K16Rik1	3.46078e-15	0.273364	0.204	0.086	6.88729e-11	3	C230096K16Rik
Dusp101	8.95816e-15	0.479442	0.347	0.241	1.78276e-10	3	Dusp10
Clec2i	1.23355e-14	0.25923	0.179	0.084	2.45489e-10	3	Clec2i
AC125206.3	1.37012e-14	0.251727	0.145	0.048	2.72668e-10	3	AC125206.3
Grk6	2.2352e-14	0.327611	0.382	0.317	4.44828e-10	3	Grk6
5830444F18Rik	2.25801e-14	0.401587	0.414	0.303	4.49367e-10	3	5830444F18Rik
Gm11478	2.32265e-14	0.292226	0.629	0.624	4.62231e-10	3	Gm11478
Saraf	4.33602e-14	0.302467	0.581	0.531	8.62911e-10	3	Saraf
Arhgap45	5.09472e-14	0.26657	0.738	0.699	1.0139e-09	3	Arhgap45
Fam78a	1.44036e-13	0.38889	0.275	0.157	2.86645e-09	3	Fam78a
Rps16-ps2	1.78597e-13	0.376678	0.529	0.477	3.55427e-09	3	Rps16-ps2
Wdr89	2.19907e-13	0.318064	0.629	0.592	4.37636e-09	3	Wdr89
Ikzf1	3.26681e-13	0.374012	0.594	0.529	6.50128e-09	3	Ikzf1
mt-Atp6	3.47515e-13	0.516258	0.57	0.546	6.91589e-09	3	mt-Atp6
Il6st	4.04877e-13	0.270992	0.216	0.104	8.05746e-09	3	Il6st
Rps10-ps2	4.102e-13	0.358462	0.603	0.564	8.1634e-09	3	Rps10-ps2
Txk	4.2153e-13	0.342504	0.378	0.293	8.38887e-09	3	Txk
Fam189b	4.22801e-13	0.359382	0.404	0.295	8.41416e-09	3	Fam189b
Wdr46	1.14895e-12	0.305407	0.21	0.119	2.28653e-08	3	Wdr46
Klhdc1	1.28407e-12	0.281289	0.155	0.046	2.55543e-08	3	Klhdc1
Arhgef18	1.54899e-12	0.262998	0.173	0.074	3.08264e-08	3	Arhgef18
Frat2	1.66798e-12	0.311875	0.192	0.095	3.31945e-08	3	Frat2
Gm36932	4.66659e-12	0.265697	0.192	0.11	9.28698e-08	3	Gm36932
Chd31	4.77796e-12	0.306639	0.516	0.455	9.50863e-08	3	Chd3
Srpk1	1.08241e-11	0.337869	0.56	0.501	2.1541e-07	3	Srpk1
Bach21	1.16596e-11	0.310408	0.201	0.105	2.32038e-07	3	Bach2
Rnf167	1.30658e-11	0.334681	0.316	0.208	2.60023e-07	3	Rnf167
Pdlim1	4.34036e-11	0.261325	0.196	0.102	8.63776e-07	3	Pdlim1
Dph5	6.44008e-11	0.283373	0.185	0.096	1.28164e-06	3	Dph5
Snhg1	2.15337e-10	0.327829	0.496	0.43	4.28542e-06	3	Snhg1
Tspan321	5.32576e-10	0.262697	0.258	0.169	1.05988e-05	3	Tspan32
Macf1	2.26886e-09	0.332228	0.538	0.488	4.51527e-05	3	Macf1
Tnrc6c	4.93162e-09	0.283734	0.442	0.376	9.81442e-05	3	Tnrc6c
Snrpd3	6.12183e-09	0.29887	0.533	0.489	0.00012183	3	Snrpd3
Nop10	6.29102e-09	0.258042	0.611	0.585	0.000125198	3	Nop10
Socs31	2.15769e-08	0.292124	0.28	0.188	0.000429401	3	Socs3
Gm28438	2.25551e-08	0.265367	0.641	0.601	0.000448869	3	Gm28438
Fam69a	3.32953e-08	0.266864	0.189	0.094	0.00066261	3	Fam69a
Crlf31	6.35451e-08	0.318087	0.536	0.497	0.00126461	3	Crlf3
Dnah8	1.29623e-07	0.279427	0.225	0.141	0.00257963	3	Dnah8
Ppp2r5a	1.3342e-07	0.277895	0.465	0.438	0.0026552	3	Ppp2r5a
Gpatch4	2.35734e-07	0.25836	0.161	0.097	0.00469134	3	Gpatch4
Stt3b	4.74916e-07	0.420503	0.324	0.259	0.00945131	3	Stt3b
Tmem71	4.96026e-07	0.278399	0.348	0.296	0.00987141	3	Tmem71
Stk4	5.65509e-07	0.255305	0.47	0.452	0.0112542	3	Stk4
Kcnq1ot1	6.85823e-07	0.322797	0.39	0.329	0.0136486	3	Kcnq1ot1
Sptbn1	8.91066e-07	0.312309	0.377	0.309	0.0177331	3	Sptbn1
Rpl7-ps7	1.0589e-06	0.262551	0.479	0.463	0.0210732	3	Rpl7-ps7
Snhg8	1.2995e-06	0.279892	0.518	0.5	0.0258614	3	Snhg8
Arhgef1	3.33459e-06	0.263158	0.587	0.583	0.0663617	3	Arhgef1
Il17ra	4.31721e-06	0.272088	0.225	0.148	0.0859168	3	Il17ra
Arhgap15	1.5894e-05	0.325219	0.449	0.394	0.316307	3	Arhgap15
Gm9794	2.54499e-05	0.266609	0.633	0.628	0.506478	3	Gm9794
Gm10073	3.26787e-05	0.331631	0.395	0.344	0.650339	3	Gm10073
Ndrg3	6.39224e-05	0.332922	0.223	0.149	1	3	Ndrg3
Rbm38	0.000255691	0.256799	0.274	0.234	1	3	Rbm38
Rps10-ps1	0.00146924	0.255402	0.392	0.391	1	3	Rps10-ps1
Rps24-ps3	0.00164486	0.2794	0.317	0.279	1	3	Rps24-ps3
Ier2	0.00492707	0.250405	0.526	0.545	1	3	Ier2
Cd8a1	1.90382e-196	1.09632	0.988	0.385	3.78878e-192	4	Cd8a
Nkg71	2.90845e-185	1.03573	0.997	0.627	5.78811e-181	4	Nkg7
Spp11	9.83129e-183	2.01697	0.912	0.374	1.95653e-178	4	Spp1
Lgals31	3.27164e-175	1.05343	0.977	0.478	6.51088e-171	4	Lgals3
Ctsd	3.71719e-166	0.944402	0.985	0.614	7.39757e-162	4	Ctsd
Klrd11	1.17756e-158	0.921954	0.981	0.434	2.34347e-154	4	Klrd1
Klrc11	1.72221e-151	0.848381	0.976	0.332	3.42738e-147	4	Klrc1
Lat2	5.17872e-143	0.730955	0.749	0.152	1.03062e-138	4	Lat2
Pdcd11	1.40356e-133	0.84113	0.935	0.399	2.79323e-129	4	Pdcd1
Cd8b11	5.42511e-133	0.807804	0.988	0.401	1.07965e-128	4	Cd8b1
Prf11	5.38669e-132	1.02232	0.864	0.279	1.07201e-127	4	Prf1
Tmsb4x	2.06627e-126	0.457995	1	1	4.11208e-122	4	Tmsb4x
Klre11	9.46034e-126	0.707404	0.688	0.144	1.8827e-121	4	Klre1
S100a41	3.237e-125	0.849059	0.985	0.661	6.44195e-121	4	S100a4
Rgs161	3.31688e-121	0.890785	0.87	0.321	6.60092e-117	4	Rgs16
Cxcr61	7.55729e-120	0.749135	0.962	0.416	1.50398e-115	4	Cxcr6
Klrc21	2.87373e-118	0.559718	0.88	0.262	5.719e-114	4	Klrc2
Litaf1	5.22881e-118	0.693795	0.834	0.256	1.04059e-113	4	Litaf
Irf81	1.43507e-109	0.879413	0.875	0.345	2.85594e-105	4	Irf8
Cd52	1.77097e-109	0.602198	1	0.971	3.52441e-105	4	Cd52
Jaml1	4.11963e-104	0.561032	0.826	0.278	8.19847e-100	4	Jaml
Abcb9	1.76007e-101	0.570114	0.604	0.125	3.50271e-97	4	Abcb9
Eef1a1	5.02595e-101	0.301054	1	0.999	1.00021e-96	4	Eef1a1
Ctla2a	8.67579e-101	0.741063	0.963	0.59	1.72657e-96	4	Ctla2a
Lag31	1.02958e-98	0.475052	0.924	0.366	2.04896e-94	4	Lag3
Ybx31	1.81488e-97	0.595464	0.911	0.412	3.6118e-93	4	Ybx3
Nrgn1	8.02423e-97	0.700569	0.689	0.184	1.5969e-92	4	Nrgn
S100a6	1.36041e-96	0.816069	0.971	0.74	2.70736e-92	4	S100a6
Arsb	2.18757e-96	0.482994	0.597	0.123	4.35348e-92	4	Arsb
Tmem163	9.1925e-96	0.413177	0.484	0.074	1.8294e-91	4	Tmem163
Cst71	2.48693e-95	0.573672	0.932	0.452	4.94924e-91	4	Cst7
Ugcg	8.76242e-94	0.559845	0.839	0.331	1.74381e-89	4	Ugcg
Cd3g	1.15219e-93	0.470845	0.999	0.973	2.29297e-89	4	Cd3g
Ctsw1	1.08362e-90	0.518281	0.939	0.461	2.15651e-86	4	Ctsw
Rpl281	1.51903e-89	0.388543	1	0.981	3.02301e-85	4	Rpl28
Ptpn61	1.55396e-88	0.551248	0.771	0.289	3.09253e-84	4	Ptpn6
Klrk11	7.44657e-88	0.467773	0.915	0.349	1.48194e-83	4	Klrk1
Nr4a21	1.63653e-84	0.736376	0.738	0.263	3.25685e-80	4	Nr4a2
Magohb	1.34162e-82	0.462963	0.606	0.153	2.66996e-78	4	Magohb
S100a11	4.17664e-81	0.543737	0.969	0.724	8.31193e-77	4	S100a11
Plek1	4.23893e-80	0.445569	0.6	0.148	8.43589e-76	4	Plek
Rps261	1.82702e-79	0.33296	1	0.984	3.63595e-75	4	Rps26
Rbpj1	8.00579e-79	0.477552	0.866	0.364	1.59323e-74	4	Rbpj
Sh3bgrl3	3.73725e-77	0.420884	0.998	0.921	7.4375e-73	4	Sh3bgrl3
Plac81	4.14452e-77	0.777118	0.68	0.27	8.24801e-73	4	Plac8
Dapk2	1.7413e-76	0.401886	0.446	0.065	3.46536e-72	4	Dapk2
Itga1	4.64849e-76	0.422593	0.439	0.075	9.25096e-72	4	Itga1
Rps15a1	2.39068e-75	0.250774	1	0.997	4.75769e-71	4	Rps15a
Fgl2	4.86236e-75	0.564647	0.765	0.296	9.67658e-71	4	Fgl2
Sub11	3.49854e-74	0.424211	0.995	0.859	6.96244e-70	4	Sub1
Gzmf	6.69055e-74	2.7287	0.498	0.17	1.33149e-69	4	Gzmf
Fcer1g	7.16519e-74	1.18265	0.435	0.087	1.42594e-69	4	Fcer1g
Sema4a	2.23839e-73	0.365368	0.613	0.181	4.45461e-69	4	Sema4a
Klra5	1.66813e-72	1.33043	0.372	0.057	3.31975e-68	4	Klra5
Tm6sf1	1.35178e-71	0.402283	0.552	0.143	2.69017e-67	4	Tm6sf1
Cdk6	2.1867e-71	0.517384	0.735	0.306	4.35176e-67	4	Cdk6
Havcr21	2.92664e-71	0.520898	0.55	0.126	5.82431e-67	4	Havcr2
Styk11	5.61075e-71	0.417546	0.395	0.051	1.1166e-66	4	Styk1
Anxa21	3.19274e-69	0.487793	0.974	0.584	6.35388e-65	4	Anxa2
Id21	3.47828e-69	0.496617	0.982	0.692	6.92212e-65	4	Id2
Gem1	6.99656e-69	0.434866	0.722	0.29	1.39238e-64	4	Gem
Cox5a	1.11594e-68	0.405954	0.981	0.752	2.22084e-64	4	Cox5a
Eif3h1	2.77079e-67	0.384682	0.998	0.906	5.51414e-63	4	Eif3h
Zyx1	1.36494e-66	0.413552	0.863	0.404	2.71638e-62	4	Zyx
Ifitm11	5.66207e-66	1.51476	0.544	0.184	1.12681e-61	4	Ifitm1
Il2rb	1.65318e-65	0.481258	0.899	0.474	3.28998e-61	4	Il2rb
F2r	8.85982e-65	0.356671	0.545	0.157	1.76319e-60	4	F2r
Ier5l1	9.54756e-64	0.598748	0.572	0.156	1.90006e-59	4	Ier5l
Rpl321	5.80913e-63	0.269951	1	0.997	1.15607e-58	4	Rpl32
Gzmb1	2.4671e-61	0.739312	0.894	0.526	4.90977e-57	4	Gzmb
Ifitm21	1.33091e-60	0.772456	0.7	0.315	2.64864e-56	4	Ifitm2
Rpl33	2.51206e-59	0.251793	1	0.989	4.99925e-55	4	Rpl3
Ccdc501	2.58837e-59	0.297351	0.655	0.25	5.15111e-55	4	Ccdc50
Nek6	9.20076e-59	0.306977	0.354	0.051	1.83104e-54	4	Nek6
Ppp1r3b	3.29637e-58	0.339555	0.485	0.134	6.56011e-54	4	Ppp1r3b
Thy11	1.64804e-57	0.35775	0.995	0.783	3.27976e-53	4	Thy1
Bcl2a1d1	1.55376e-56	0.393399	0.836	0.366	3.09214e-52	4	Bcl2a1d
Cox8a	1.86596e-56	0.297731	0.998	0.938	3.71344e-52	4	Cox8a
Gpd2	5.32428e-56	0.33596	0.49	0.129	1.05959e-51	4	Gpd2
Chsy1	1.51517e-55	0.327932	0.502	0.149	3.01533e-51	4	Chsy1
Bcl2	2.69395e-55	0.375446	0.833	0.407	5.36123e-51	4	Bcl2
Ccl41	3.70211e-55	0.290275	0.738	0.354	7.36757e-51	4	Ccl4
Ech1	1.12869e-54	0.373367	0.824	0.421	2.2462e-50	4	Ech1
2020-09-11	1.45138e-54	0.367148	0.649	0.243	2.88839e-50	4	2020-09-11
Stk39	3.72838e-54	0.326878	0.551	0.177	7.41984e-50	4	Stk39
Filip1	3.99618e-54	0.353918	0.273	0.027	7.95281e-50	4	Filip1
Entpd1	4.96551e-54	0.354019	0.542	0.172	9.88187e-50	4	Entpd1
Hopx	1.12604e-53	0.344472	0.762	0.341	2.24094e-49	4	Hopx
Efhd2	1.21127e-53	0.33995	0.721	0.3	2.41055e-49	4	Efhd2
Pgk11	3.01081e-53	0.457183	0.972	0.687	5.9918e-49	4	Pgk1
AW1120101	5.06539e-53	0.41388	0.999	0.946	1.00806e-48	4	AW112010
Adssl1	2.34284e-52	0.293303	0.402	0.099	4.66249e-48	4	Adssl1
Rps22	1.77824e-51	0.288381	1	0.964	3.53887e-47	4	Rps2
Gm29243	2.55063e-51	0.279321	0.481	0.159	5.07602e-47	4	Gm29243
Rpl13a	7.50298e-51	0.346213	0.883	0.518	1.49317e-46	4	Rpl13a
Txn1	1.64266e-50	0.343305	0.984	0.782	3.26905e-46	4	Txn1
1700017B05Rik	2.71152e-50	0.256297	0.466	0.143	5.3962e-46	4	1700017B05Rik
Ybx1	3.62752e-50	0.346247	0.993	0.843	7.21913e-46	4	Ybx1
Chn2	8.21822e-50	0.270443	0.288	0.038	1.63551e-45	4	Chn2
Fasl1	2.32367e-49	0.28886	0.574	0.194	4.62433e-45	4	Fasl
Gzmc	3.58836e-49	1.50941	0.34	0.075	7.1412e-45	4	Gzmc
Acot71	5.2826e-49	0.32182	0.735	0.336	1.05129e-44	4	Acot7
Nme1	7.53252e-49	0.39309	0.924	0.591	1.49905e-44	4	Nme1
Ubash3b1	1.07516e-48	0.292067	0.546	0.182	2.13968e-44	4	Ubash3b
Napsa	8.01061e-48	0.279092	0.272	0.041	1.59419e-43	4	Napsa
Tmem2	1.296e-47	0.306398	0.437	0.132	2.57917e-43	4	Tmem2
Aprt	1.6533e-47	0.388756	0.911	0.576	3.29024e-43	4	Aprt
Tmem126a1	2.14895e-47	0.292551	0.704	0.315	4.27663e-43	4	Tmem126a
Slc25a4	2.88129e-47	0.336011	0.92	0.556	5.73406e-43	4	Slc25a4
Eef2	5.54165e-47	0.29114	0.998	0.95	1.10284e-42	4	Eef2
Dut	1.18849e-46	0.465308	0.767	0.375	2.36521e-42	4	Dut
Cox171	1.58716e-46	0.381616	0.934	0.605	3.15861e-42	4	Cox17
Atp5f1	3.33535e-46	0.343489	0.976	0.744	6.63767e-42	4	Atp5f1
Gng2	7.10584e-46	0.382032	0.899	0.485	1.41413e-41	4	Gng2
Ostf11	2.58949e-45	0.278762	0.979	0.732	5.15333e-41	4	Ostf1
C1qtnf6	2.95469e-45	0.260672	0.318	0.076	5.88013e-41	4	C1qtnf6
Cd1601	7.39602e-45	0.28206	0.511	0.184	1.47188e-40	4	Cd160
AC163354.1	8.90208e-45	0.283994	0.301	0.041	1.7716e-40	4	AC163354.1
a	9.21379e-45	0.295584	0.275	0.034	1.83364e-40	4	a
Arpc1b	1.25572e-44	0.277358	0.996	0.9	2.49902e-40	4	Arpc1b
Cd244	7.49075e-44	0.253012	0.292	0.039	1.49073e-39	4	Cd244
Myl6	9.01121e-43	0.273686	0.999	0.968	1.79332e-38	4	Myl6
Esyt1	9.03384e-43	0.283667	0.738	0.35	1.79783e-38	4	Esyt1
B4galnt11	9.96722e-43	0.328725	0.828	0.414	1.98358e-38	4	B4galnt1
Lgals11	2.03078e-42	0.382961	0.999	0.839	4.04146e-38	4	Lgals1
Runx3	4.58242e-42	0.292562	0.864	0.485	9.11947e-38	4	Runx3
Gapdh2	9.8124e-42	0.325428	1	0.947	1.95277e-37	4	Gapdh
Ube2m	3.71224e-41	0.277062	0.813	0.439	7.38774e-37	4	Ube2m
Prdx5	2.30906e-40	0.315417	0.913	0.579	4.59526e-36	4	Prdx5
Rps27l	7.89466e-40	0.275977	0.854	0.497	1.57112e-35	4	Rps27l
AA467197	9.89995e-40	0.346427	0.501	0.168	1.97019e-35	4	AA467197
Prelid1	2.98006e-39	0.334389	0.895	0.546	5.93062e-35	4	Prelid1
Impa21	5.66251e-39	0.269841	0.595	0.251	1.1269e-34	4	Impa2
Serpinb6a1	7.93468e-39	0.282506	0.741	0.351	1.57908e-34	4	Serpinb6a
Nedd9	8.22826e-39	0.290985	0.618	0.254	1.63751e-34	4	Nedd9
Rpa2	1.0419e-38	0.254112	0.521	0.201	2.07348e-34	4	Rpa2
Etfb	4.054e-38	0.339292	0.767	0.37	8.06787e-34	4	Etfb
Dusp21	5.49648e-38	0.280855	0.824	0.474	1.09385e-33	4	Dusp2
Eno11	1.8197e-37	0.41158	0.963	0.718	3.62138e-33	4	Eno1
Sh2d2a1	1.18002e-36	0.372448	0.891	0.525	2.34835e-32	4	Sh2d2a
Bcl2a1b1	2.02843e-36	0.296786	0.927	0.529	4.03679e-32	4	Bcl2a1b
Casp3	2.34366e-35	0.306069	0.768	0.361	4.66411e-31	4	Casp3
Cox5b	3.8595e-35	0.298138	0.982	0.775	7.68079e-31	4	Cox5b
Serpinb91	4.60243e-35	0.302349	0.546	0.25	9.15929e-31	4	Serpinb9
Gm19585	5.56869e-35	0.254427	0.672	0.317	1.10822e-30	4	Gm19585
Phb2	3.8871e-34	0.281965	0.847	0.488	7.73572e-30	4	Phb2
Itgal1	5.07484e-34	0.253142	0.854	0.486	1.00994e-29	4	Itgal
Ntan1	8.25801e-34	0.270436	0.775	0.422	1.64343e-29	4	Ntan1
Hnrnpa1	1.29298e-32	0.285308	0.914	0.623	2.57316e-28	4	Hnrnpa1
Rap1a	7.72045e-32	0.27836	0.958	0.69	1.53645e-27	4	Rap1a
Mt1	1.35023e-31	0.435716	0.351	0.117	2.68709e-27	4	Mt1
Nap1l1	3.15266e-31	0.275171	0.836	0.493	6.27411e-27	4	Nap1l1
Hilpda2	5.61966e-31	0.341451	0.684	0.368	1.11837e-26	4	Hilpda
Tmem256	6.48647e-31	0.266017	0.781	0.405	1.29087e-26	4	Tmem256
Slc25a5	8.89687e-31	0.268451	0.974	0.766	1.77057e-26	4	Slc25a5
Ly6e	9.40194e-31	0.26369	0.783	0.431	1.87108e-26	4	Ly6e
Tpi11	9.86798e-31	0.315537	0.894	0.544	1.96383e-26	4	Tpi1
Csnk2b	1.11304e-29	0.290999	0.905	0.562	2.21506e-25	4	Csnk2b
Dbi1	2.67094e-29	0.28646	0.839	0.466	5.31543e-25	4	Dbi
Myl12a	4.62021e-29	0.250242	0.988	0.843	9.19468e-25	4	Myl12a
Slc17a61	7.21386e-28	0.365246	0.337	0.118	1.43563e-23	4	Slc17a6
Pgam1	6.44065e-27	0.316051	0.908	0.6	1.28175e-22	4	Pgam1
Aldoa1	1.03269e-26	0.295996	0.992	0.848	2.05515e-22	4	Aldoa
Tcrg-C2	6.00285e-26	0.26708	0.209	0.051	1.19463e-21	4	Tcrg-C2
Ifitm31	3.66879e-24	0.321993	0.509	0.251	7.30126e-20	4	Ifitm3
Nrn11	2.68702e-22	0.296731	0.32	0.118	5.34744e-18	4	Nrn1
Ranbp1	5.04672e-22	0.26254	0.838	0.516	1.00435e-17	4	Ranbp1
Gm1561	3.76079e-21	0.433682	0.162	0.027	7.48435e-17	4	Gm156
Cx3cr11	4.83689e-19	0.259574	0.264	0.094	9.6259e-15	4	Cx3cr1
Gzmd1	3.63048e-18	0.944943	0.233	0.083	7.22502e-14	4	Gzmd
Klra3	1.77696e-14	0.266199	0.117	0.032	3.53633e-10	4	Klra3
Gzme1	5.74601e-14	0.664137	0.18	0.059	1.14351e-09	4	Gzme
Ccl5	2.86875e-109	2.02409	0.8	0.44	5.70911e-105	5	Ccl5
Ms4a4b1	4.43656e-109	0.822601	0.984	0.816	8.8292e-105	5	Ms4a4b
Ly6c2	1.61557e-100	1.37973	0.679	0.238	3.21514e-96	5	Ly6c2
Ms4a6b	2.10684e-77	0.592699	0.969	0.89	4.19283e-73	5	Ms4a6b
Ly6c1	1.43009e-73	1.02773	0.604	0.237	2.84603e-69	5	Ly6c1
Cd8b12	3.01602e-70	0.841315	0.77	0.438	6.00219e-66	5	Cd8b1
Ifit3	1.51302e-59	1.04589	0.322	0.042	3.01106e-55	5	Ifit3
Hcst	6.82031e-56	0.565981	0.914	0.825	1.35731e-51	5	Hcst
Ctsw2	6.66452e-52	0.610852	0.773	0.49	1.32631e-47	5	Ctsw
Gramd31	1.47577e-50	0.6345	0.613	0.339	2.93693e-46	5	Gramd3
Gzmk	2.4565e-48	0.728238	0.286	0.06	4.88869e-44	5	Gzmk
Ifi203	8.19484e-44	0.732018	0.819	0.658	1.63085e-39	5	Ifi203
Ifi214	2.8389e-42	0.62956	0.385	0.145	5.64969e-38	5	Ifi214
Nkg72	1.58685e-40	0.429337	0.915	0.645	3.15799e-36	5	Nkg7
Cxcr31	1.18249e-38	0.510702	0.542	0.28	2.35327e-34	5	Cxcr3
Slfn21	1.23942e-38	0.530467	0.788	0.632	2.46657e-34	5	Slfn2
Slamf7	6.80003e-37	0.552848	0.315	0.099	1.35327e-32	5	Slamf7
Epsti1	5.41664e-36	0.602462	0.672	0.506	1.07797e-31	5	Epsti1
Ifit3b	2.83135e-35	0.518348	0.163	0.015	5.63466e-31	5	Ifit3b
Mndal	7.4489e-34	0.621661	0.783	0.64	1.48241e-29	5	Mndal
Mx1	8.94178e-34	0.602149	0.199	0.034	1.7795e-29	5	Mx1
Sp100	7.29772e-33	0.518009	0.795	0.669	1.45232e-28	5	Sp100
Rtp4	2.11228e-32	0.63265	0.474	0.219	4.20364e-28	5	Rtp4
Ifit1	2.6521e-32	1.06134	0.315	0.081	5.27795e-28	5	Ifit1
Ifi208	7.6412e-31	0.446804	0.294	0.107	1.52068e-26	5	Ifi208
Zfp36l21	8.08874e-31	0.524261	0.753	0.637	1.60974e-26	5	Zfp36l2
Slfn11	1.38634e-30	0.63341	0.516	0.291	2.75896e-26	5	Slfn1
Ifi206	3.02731e-29	0.398012	0.208	0.052	6.02464e-25	5	Ifi206
Gpr1831	4.30354e-27	0.526243	0.577	0.429	8.56447e-23	5	Gpr183
Isg15	1.88425e-26	1.09836	0.444	0.278	3.74985e-22	5	Isg15
Itgb11	7.44663e-24	0.384428	0.599	0.477	1.48195e-19	5	Itgb1
Ifi209	2.57724e-23	0.642568	0.475	0.277	5.12896e-19	5	Ifi209
Ctla2a1	4.88859e-23	0.382244	0.761	0.62	9.72878e-19	5	Ctla2a
Usp18	1.06441e-22	0.513829	0.235	0.08	2.11827e-18	5	Usp18
Sp110	1.48912e-21	0.418436	0.587	0.464	2.9635e-17	5	Sp110
Hopx1	1.86796e-21	0.486987	0.521	0.376	3.71743e-17	5	Hopx
Gzma	3.97763e-21	1.37089	0.21	0.057	7.91588e-17	5	Gzma
Zbp11	5.37288e-21	0.5597	0.657	0.527	1.06926e-16	5	Zbp1
Irf7	7.74171e-21	0.514677	0.352	0.179	1.54068e-16	5	Irf7
Rsad2	1.77034e-20	0.557471	0.135	0.024	3.52315e-16	5	Rsad2
Cd521	3.40697e-20	0.311527	0.989	0.973	6.78022e-16	5	Cd52
Arl4c1	3.6105e-20	0.361853	0.549	0.414	7.18525e-16	5	Arl4c
Klrk12	5.34682e-20	0.425916	0.601	0.395	1.06407e-15	5	Klrk1
Cd8a2	5.41811e-20	0.271773	0.71	0.429	1.07826e-15	5	Cd8a
St3gal6	6.52932e-20	0.355435	0.24	0.096	1.2994e-15	5	St3gal6
Gm89952	7.01876e-20	0.354731	0.86	0.789	1.3968e-15	5	Gm8995
Klrc12	7.02297e-20	0.43027	0.576	0.389	1.39764e-15	5	Klrc1
Ifi47	2.03168e-19	0.546588	0.648	0.531	4.04325e-15	5	Ifi47
Cxcr62	1.2334e-18	0.456551	0.634	0.463	2.4546e-14	5	Cxcr6
Phf11c	1.48747e-18	0.292828	0.182	0.068	2.96022e-14	5	Phf11c
Xaf1	1.88032e-18	0.477821	0.406	0.248	3.74202e-14	5	Xaf1
Ccr51	1.46182e-17	0.367657	0.458	0.33	2.90917e-13	5	Ccr5
Gng21	1.90769e-17	0.342399	0.608	0.525	3.79649e-13	5	Gng2
Bst2	4.25944e-17	0.557183	0.614	0.497	8.47671e-13	5	Bst2
Oas3	4.67105e-17	0.335773	0.194	0.056	9.29586e-13	5	Oas3
Gimap4	5.21911e-17	0.299153	0.827	0.763	1.03866e-12	5	Gimap4
Selplg	1.51259e-16	0.27877	0.812	0.77	3.01021e-12	5	Selplg
Lime1	1.52922e-16	0.295935	0.809	0.769	3.04331e-12	5	Lime1
AC151730.1	3.6354e-16	0.265293	0.117	0.027	7.23482e-12	5	AC151730.1
Mx2	7.71345e-16	0.286972	0.11	0.018	1.53505e-11	5	Mx2
Irgm1	7.91595e-16	0.389342	0.382	0.249	1.57535e-11	5	Irgm1
Runx31	8.70021e-16	0.362896	0.612	0.52	1.73143e-11	5	Runx3
Samd9l1	3.22683e-15	0.410658	0.457	0.341	6.42171e-11	5	Samd9l
Ddx60	1.12164e-14	0.323917	0.198	0.087	2.23218e-10	5	Ddx60
9930111J21Rik2	1.47637e-14	0.429963	0.523	0.407	2.93813e-10	5	9930111J21Rik2
S100a61	1.91948e-13	0.27174	0.842	0.759	3.81996e-09	5	S100a6
Phf11b	4.20408e-13	0.544022	0.485	0.385	8.36654e-09	5	Phf11b
Jaml2	4.90966e-13	0.438116	0.448	0.331	9.77071e-09	5	Jaml
Igtp1	7.8184e-13	0.390328	0.614	0.517	1.55594e-08	5	Igtp
Pde7a	1.33526e-12	0.325448	0.32	0.221	2.6573e-08	5	Pde7a
Lilr4b	1.42762e-12	0.306337	0.151	0.057	2.84112e-08	5	Lilr4b
Trafd1	1.66767e-12	0.3488	0.278	0.185	3.31883e-08	5	Trafd1
Trim30a	1.72537e-12	0.494495	0.457	0.334	3.43367e-08	5	Trim30a
Klf22	4.44476e-12	0.434199	0.614	0.493	8.84551e-08	5	Klf2
Gbp9	4.98353e-12	0.35658	0.328	0.216	9.91773e-08	5	Gbp9
Slfn5	7.65387e-12	0.64206	0.254	0.124	1.5232e-07	5	Slfn5
Ifit2	9.45847e-12	0.381159	0.152	0.061	1.88233e-07	5	Ifit2
Gm12250	1.20355e-11	0.413404	0.378	0.239	2.39519e-07	5	Gm12250
Ddx58	1.44376e-11	0.263233	0.237	0.139	2.87323e-07	5	Ddx58
Gbp4	1.64421e-11	0.44769	0.62	0.541	3.27214e-07	5	Gbp4
Slco3a1	2.27507e-11	0.320261	0.278	0.165	4.52762e-07	5	Slco3a1
Abcb1a	5.02241e-11	0.259842	0.205	0.111	9.9951e-07	5	Abcb1a
Cd226	5.37868e-11	0.308079	0.38	0.286	1.07041e-06	5	Cd226
Psmb10	1.28857e-10	0.257996	0.615	0.58	2.56437e-06	5	Psmb10
Gm4759	1.48852e-10	0.308841	0.515	0.433	2.9623e-06	5	Gm4759
Klf62	1.57556e-10	0.341562	0.745	0.71	3.13553e-06	5	Klf6
Atp8b4	7.48817e-10	0.295047	0.258	0.158	1.49022e-05	5	Atp8b4
Cd691	9.63301e-10	0.487652	0.44	0.353	1.91707e-05	5	Cd69
Pde3b	1.62189e-09	0.264674	0.295	0.209	3.22772e-05	5	Pde3b
Emb2	1.67602e-09	0.254608	0.537	0.393	3.33544e-05	5	Emb
Btg22	3.53242e-09	0.313678	0.78	0.725	7.02987e-05	5	Btg2
Klrc22	5.1018e-09	0.342648	0.418	0.325	0.000101531	5	Klrc2
Zyx2	1.20469e-08	0.289814	0.532	0.449	0.000239746	5	Zyx
Gpr1711	1.7546e-08	0.255455	0.399	0.337	0.000349182	5	Gpr171
Samhd11	1.87937e-08	0.326011	0.646	0.591	0.000374014	5	Samhd1
Gm8369	5.32025e-08	0.31525	0.334	0.243	0.00105878	5	Gm8369
Dnajc15	6.26571e-08	0.349532	0.442	0.377	0.00124694	5	Dnajc15
Ubc1	6.77254e-08	0.320693	0.68	0.651	0.0013478	5	Ubc
Ptpn221	7.3998e-08	0.259534	0.543	0.487	0.00147263	5	Ptpn22
Rnf138	7.8499e-08	0.316919	0.515	0.449	0.00156221	5	Rnf138
Mitd1	8.04131e-08	0.262696	0.351	0.282	0.0016003	5	Mitd1
Ahnak1	8.444e-08	0.281905	0.635	0.588	0.00168044	5	Ahnak
Bcl21	8.56814e-08	0.354519	0.516	0.45	0.00170515	5	Bcl2
Zcchc111	1.10466e-07	0.279052	0.55	0.487	0.00219839	5	Zcchc11
Gbp2	1.109e-07	0.397963	0.342	0.208	0.00220701	5	Gbp2
Rnf213	1.23018e-07	0.329088	0.245	0.152	0.00244818	5	Rnf213
Dusp22	1.33992e-07	0.380484	0.548	0.511	0.00266658	5	Dusp2
Daxx	1.5991e-07	0.325653	0.229	0.157	0.00318236	5	Daxx
Slfn8	3.06652e-07	0.275375	0.29	0.221	0.00610269	5	Slfn8
Emp3	4.57228e-07	0.296505	0.637	0.605	0.00909929	5	Emp3
Itga41	5.5223e-07	0.327221	0.307	0.238	0.0109899	5	Itga4
Themis	7.57095e-07	0.266809	0.284	0.211	0.0150669	5	Themis
Gbp2b	9.37599e-07	0.37168	0.326	0.217	0.0186592	5	Gbp2b
Parp14	1.00467e-06	0.354375	0.37	0.296	0.019994	5	Parp14
Tpst2	1.16119e-06	0.257233	0.42	0.345	0.0231088	5	Tpst2
Sorl1	1.18292e-06	0.25175	0.312	0.231	0.0235414	5	Sorl1
Hipk1	1.83808e-06	0.252084	0.363	0.307	0.0365796	5	Hipk1
Fasl2	4.31762e-06	0.369933	0.317	0.23	0.085925	5	Fasl
Isg201	4.6142e-06	0.413733	0.369	0.327	0.0918272	5	Isg20
Ifitm10	6.03063e-06	0.259428	0.19	0.111	0.120016	5	Ifitm10
Gbp71	8.84147e-06	0.306744	0.597	0.571	0.175954	5	Gbp7
Ier51	1.02184e-05	0.265855	0.602	0.559	0.203357	5	Ier5
Lgals3bp	3.70786e-05	0.279092	0.295	0.22	0.737902	5	Lgals3bp
Nmi	3.77906e-05	0.262579	0.443	0.395	0.75207	5	Nmi
Sgk1	4.24289e-05	0.316338	0.27	0.214	0.844378	5	Sgk1
Smchd1	4.51228e-05	0.265955	0.46	0.434	0.897989	5	Smchd1
Sema4a1	5.26811e-05	0.273318	0.295	0.224	1	5	Sema4a
Glipr2	7.64547e-05	0.253131	0.411	0.368	1	5	Glipr2
Hspa1b1	0.000198773	0.328554	0.691	0.639	1	5	Hspa1b
Ppp1r12a	0.000658761	0.254991	0.479	0.428	1	5	Ppp1r12a
Hspa1a1	0.000716241	0.391118	0.675	0.625	1	5	Hspa1a
Dnajb11	0.000908208	0.413941	0.547	0.52	1	5	Dnajb1
Evi2a	0.00122926	0.2658	0.245	0.178	1	5	Evi2a
Gm268251	0.00215368	0.316914	0.591	0.552	1	5	Gm26825
Ptma	2.57957e-236	1.01051	1	0.992	5.13361e-232	6	Ptma
Ctsz1	1.35362e-180	1.18022	0.897	0.282	2.69385e-176	6	Ctsz
Fabp51	3.35678e-180	1.23032	0.886	0.287	6.68033e-176	6	Fabp5
Ran	2.05578e-178	0.940494	0.986	0.747	4.09121e-174	6	Ran
Cd811	1.3289e-174	1.21678	0.852	0.194	2.64465e-170	6	Cd81
Pkm1	5.04846e-162	0.812441	0.99	0.824	1.00469e-157	6	Pkm
Tnfrsf41	1.30732e-148	1.09029	0.973	0.51	2.6017e-144	6	Tnfrsf4
H2afz	6.24632e-140	1.06446	0.985	0.849	1.24308e-135	6	H2afz
Bmyc1	7.7046e-140	0.877168	0.75	0.178	1.53329e-135	6	Bmyc
Ly6a1	3.39505e-136	1.02428	0.938	0.491	6.75649e-132	6	Ly6a
Prdx4	1.65781e-135	0.732167	0.676	0.131	3.29921e-131	6	Prdx4
Ppia	2.14826e-135	0.490663	0.998	0.993	4.27524e-131	6	Ppia
Cmtm71	7.86697e-131	0.909246	0.918	0.496	1.56561e-126	6	Cmtm7
Chchd101	7.2316e-129	0.97096	0.828	0.302	1.43916e-124	6	Chchd10
Foxp31	1.37159e-124	0.533938	0.828	0.208	2.7296e-120	6	Foxp3
Pfn1	4.47309e-121	0.491403	0.999	0.985	8.9019e-117	6	Pfn1
Tnfrsf181	2.61761e-118	0.667466	0.981	0.725	5.2093e-114	6	Tnfrsf18
Anp32b	3.39604e-118	0.685202	0.971	0.744	6.75846e-114	6	Anp32b
Ikzf21	1.5229e-117	0.611693	0.924	0.378	3.03072e-113	6	Ikzf2
Ldha	1.81425e-111	0.626112	0.986	0.851	3.61054e-107	6	Ldha
Eif4a1	2.53317e-111	0.742916	0.963	0.733	5.04125e-107	6	Eif4a1
Ass11	5.727e-111	0.642776	0.826	0.299	1.13973e-106	6	Ass1
Il2ra1	1.6008e-110	0.703367	0.839	0.312	3.18574e-106	6	Il2ra
Stmn1	8.69491e-110	1.29164	0.666	0.185	1.73037e-105	6	Stmn1
Lmnb1	7.44712e-108	0.747732	0.71	0.256	1.48205e-103	6	Lmnb1
Hint1	8.64888e-108	0.586075	0.979	0.82	1.72121e-103	6	Hint1
Vrk11	1.60204e-107	0.611098	0.706	0.202	3.18821e-103	6	Vrk1
Dctpp1	9.16214e-107	0.702969	0.731	0.249	1.82336e-102	6	Dctpp1
Psme21	1.53934e-102	0.660096	0.973	0.796	3.06345e-98	6	Psme2
Ctla41	2.25757e-100	0.727724	0.95	0.554	4.49279e-96	6	Ctla4
Psma4	3.41345e-99	0.503603	0.934	0.624	6.79311e-95	6	Psma4
Phgdh	9.84503e-99	0.651025	0.706	0.233	1.95926e-94	6	Phgdh
Mif1	9.3003e-97	0.683394	0.969	0.734	1.85085e-92	6	Mif
Tuba1b	4.43287e-96	1.01519	0.79	0.401	8.82185e-92	6	Tuba1b
Arl5a1	1.84406e-95	0.526413	0.857	0.363	3.66987e-91	6	Arl5a
Ranbp11	6.69729e-94	0.717221	0.902	0.529	1.33283e-89	6	Ranbp1
Izumo1r1	1.75442e-93	0.510703	0.793	0.271	3.49147e-89	6	Izumo1r
Lig1	2.71074e-93	0.755795	0.604	0.15	5.39464e-89	6	Lig1
Il1r21	1.99068e-92	0.84595	0.51	0.091	3.96166e-88	6	Il1r2
Cks2	4.19916e-92	0.795814	0.686	0.246	8.35674e-88	6	Cks2
Mdh11	3.23228e-91	0.559792	0.939	0.673	6.43256e-87	6	Mdh1
M6pr1	3.273e-91	0.651203	0.844	0.389	6.5136e-87	6	M6pr
Batf1	3.46688e-91	0.637577	0.774	0.317	6.89944e-87	6	Batf
Mki67	2.26567e-90	1.09755	0.545	0.13	4.50891e-86	6	Mki67
Tubb5	5.09287e-90	1.00138	0.928	0.705	1.01353e-85	6	Tubb5
Tnfrsf91	2.01145e-89	0.680688	0.953	0.6	4.00299e-85	6	Tnfrsf9
Pclaf	1.2515e-88	1.10357	0.531	0.124	2.49062e-84	6	Pclaf
Gmnn	9.31351e-88	0.614418	0.609	0.187	1.85348e-83	6	Gmnn
Rln31	1.46831e-87	0.791743	0.468	0.068	2.92208e-83	6	Rln3
Fkbp2	3.37304e-87	0.521624	0.728	0.277	6.71268e-83	6	Fkbp2
Psmb8	5.18795e-87	0.406498	0.993	0.934	1.03245e-82	6	Psmb8
Prdx1	1.07216e-86	0.584348	0.964	0.751	2.1337e-82	6	Prdx1
Calr	3.09551e-85	0.58451	0.969	0.798	6.16038e-81	6	Calr
Ybx11	6.65639e-85	0.530591	0.981	0.852	1.32469e-80	6	Ybx1
Lgals12	9.06195e-85	0.663693	0.993	0.848	1.80342e-80	6	Lgals1
Smc2	1.35467e-84	0.827902	0.61	0.177	2.69593e-80	6	Smc2
Rps27l1	2.60342e-84	0.63613	0.9	0.513	5.18107e-80	6	Rps27l
Mcm3	6.33682e-84	0.581816	0.549	0.144	1.26109e-79	6	Mcm3
Top2a	7.20822e-84	0.985314	0.546	0.146	1.43451e-79	6	Top2a
Hnrnpab	8.31986e-84	0.608601	0.878	0.515	1.65574e-79	6	Hnrnpab
Birc5	5.88706e-82	0.999951	0.447	0.082	1.17158e-77	6	Birc5
Hnrnpa3	9.03295e-82	0.461258	0.959	0.788	1.79765e-77	6	Hnrnpa3
Asf1b	1.72964e-81	0.554516	0.462	0.079	3.44217e-77	6	Asf1b
Pdia6	2.19669e-81	0.648557	0.887	0.51	4.37164e-77	6	Pdia6
Tagln2	2.56939e-81	0.61522	0.961	0.785	5.11335e-77	6	Tagln2
Rbm3	3.31748e-81	0.400594	0.995	0.956	6.60212e-77	6	Rbm3
Snrpd1	1.00709e-80	0.588093	0.85	0.46	2.00421e-76	6	Snrpd1
Mcm5	2.95338e-80	0.612014	0.577	0.143	5.87752e-76	6	Mcm5
Glrx1	9.05874e-80	0.679189	0.865	0.488	1.80278e-75	6	Glrx
Minos1	1.78335e-79	0.481595	0.965	0.727	3.54904e-75	6	Minos1
Psmb2	1.06013e-78	0.49775	0.91	0.558	2.10976e-74	6	Psmb2
Ncl	2.53343e-78	0.681975	0.951	0.745	5.04177e-74	6	Ncl
Hmgb2	7.76934e-78	1.05481	0.928	0.771	1.54618e-73	6	Hmgb2
Cdca8	1.74012e-77	0.692648	0.43	0.073	3.46301e-73	6	Cdca8
Pa2g4	1.54662e-76	0.594539	0.777	0.37	3.07793e-72	6	Pa2g4
Cks1b	6.222e-76	0.627021	0.503	0.113	1.23824e-71	6	Cks1b
Hmgn2	6.70784e-76	0.761529	0.7	0.312	1.33493e-71	6	Hmgn2
Tyms	9.56644e-76	0.683298	0.516	0.127	1.90382e-71	6	Tyms
Cyba1	1.49738e-75	0.511208	0.99	0.844	2.97994e-71	6	Cyba
Capg1	1.98782e-75	0.514828	0.97	0.677	3.95597e-71	6	Capg
Ezh2	7.61505e-75	0.576226	0.674	0.264	1.51547e-70	6	Ezh2
Eno3	8.42187e-75	0.624018	0.478	0.116	1.67604e-70	6	Eno3
Gm2a1	1.24038e-74	0.480751	0.79	0.356	2.46849e-70	6	Gm2a
Ifi27l2a1	1.50241e-74	0.602031	0.994	0.815	2.98995e-70	6	Ifi27l2a
Spc24	1.61371e-74	0.63999	0.45	0.078	3.21144e-70	6	Spc24
Cd51	1.18677e-73	0.478667	0.891	0.465	2.36179e-69	6	Cd5
Ddx39	1.31052e-73	0.527429	0.745	0.324	2.60807e-69	6	Ddx39
Gapdh3	4.17609e-73	0.411909	0.995	0.95	8.31084e-69	6	Gapdh
Tmpo	5.94105e-73	0.617114	0.782	0.388	1.18233e-68	6	Tmpo
Snrpa1	6.69369e-73	0.471835	0.753	0.338	1.33211e-68	6	Snrpa1
Mcm6	2.30337e-72	0.559964	0.598	0.179	4.58394e-68	6	Mcm6
Rbbp7	6.08323e-72	0.545946	0.78	0.384	1.21062e-67	6	Rbbp7
Rrm1	6.31692e-72	0.483995	0.51	0.131	1.25713e-67	6	Rrm1
Cdk1	1.13804e-71	0.606325	0.416	0.081	2.26482e-67	6	Cdk1
Stx111	1.38978e-71	0.444979	0.67	0.247	2.76581e-67	6	Stx11
Klrg11	4.64082e-71	0.568943	0.501	0.11	9.23569e-67	6	Klrg1
Nme11	1.36481e-70	0.585007	0.924	0.609	2.7161e-66	6	Nme1
Hsp90b1	4.08055e-70	0.551572	0.942	0.691	8.12071e-66	6	Hsp90b1
Srsf2	4.43466e-70	0.500251	0.905	0.596	8.82541e-66	6	Srsf2
Psma2	6.71746e-70	0.432783	0.957	0.76	1.33684e-65	6	Psma2
Hat1	9.02271e-70	0.421517	0.578	0.204	1.79561e-65	6	Hat1
Tk1	1.46073e-69	0.528942	0.439	0.093	2.907e-65	6	Tk1
Naa10	2.04517e-69	0.449449	0.78	0.376	4.07008e-65	6	Naa10
Gm9347	3.28462e-69	0.435523	0.532	0.136	6.53672e-65	6	Gm9347
Maf1	7.01966e-69	0.395324	0.836	0.336	1.39698e-64	6	Maf
Txn11	7.48785e-69	0.482655	0.97	0.794	1.49016e-64	6	Txn1
Rrm2	7.88417e-69	0.743997	0.425	0.08	1.56903e-64	6	Rrm2
Erh	3.63702e-68	0.457669	0.78	0.381	7.23802e-64	6	Erh
Swap701	3.86311e-68	0.312615	0.478	0.123	7.68797e-64	6	Swap70
Hells	5.43355e-68	0.486729	0.494	0.148	1.08133e-63	6	Hells
Ccna2	5.84405e-68	0.545298	0.36	0.055	1.16302e-63	6	Ccna2
Serbp1	7.53948e-68	0.444464	0.987	0.869	1.50043e-63	6	Serbp1
Pcna	1.23984e-67	0.538478	0.607	0.243	2.46741e-63	6	Pcna
Ebi31	2.52975e-67	0.343022	0.383	0.055	5.03445e-63	6	Ebi3
Cycs	5.19578e-67	0.544471	0.921	0.623	1.03401e-62	6	Cycs
Cbx3	5.44514e-67	0.481461	0.907	0.627	1.08364e-62	6	Cbx3
Hnrnpa2b1	9.11648e-67	0.415716	0.969	0.826	1.81427e-62	6	Hnrnpa2b1
Snrpe	1.21363e-66	0.423929	0.965	0.809	2.41524e-62	6	Snrpe
Selenoh	1.27406e-66	0.640913	0.727	0.365	2.53551e-62	6	Selenoh
Lsm2	1.67277e-66	0.456118	0.67	0.259	3.32898e-62	6	Lsm2
Pmf1	1.93084e-66	0.331718	0.434	0.109	3.84256e-62	6	Pmf1
Anp32e	2.66155e-66	0.49307	0.78	0.405	5.29675e-62	6	Anp32e
Nasp	8.72833e-66	0.510519	0.661	0.262	1.73702e-61	6	Nasp
Impdh2	3.32184e-65	0.469663	0.652	0.252	6.61079e-61	6	Impdh2
Srsf3	4.50612e-65	0.47384	0.932	0.718	8.96762e-61	6	Srsf3
Smco41	4.73335e-65	0.345174	0.668	0.259	9.41985e-61	6	Smco4
Chchd2	6.06287e-65	0.355532	0.983	0.896	1.20657e-60	6	Chchd2
Siva1	9.9493e-65	0.380304	0.58	0.22	1.98001e-60	6	Siva1
Sdhb	1.02206e-64	0.388491	0.805	0.458	2.034e-60	6	Sdhb
Ccnb2	1.16032e-64	0.641829	0.365	0.062	2.30915e-60	6	Ccnb2
Ppil1	1.87006e-64	0.325199	0.514	0.144	3.7216e-60	6	Ppil1
Ndufa4	1.91688e-64	0.451445	0.958	0.775	3.81479e-60	6	Ndufa4
Cox5a1	2.5106e-64	0.414242	0.961	0.766	4.99635e-60	6	Cox5a
Syngr21	2.95118e-64	0.42444	0.729	0.331	5.87315e-60	6	Syngr2
Ppa1	3.51496e-64	0.563133	0.732	0.31	6.99512e-60	6	Ppa1
Ly6e1	6.37421e-64	0.686516	0.775	0.45	1.26853e-59	6	Ly6e
Mif4gd1	8.08497e-64	0.370154	0.786	0.374	1.60899e-59	6	Mif4gd
Set	8.87242e-64	0.533871	0.949	0.721	1.7657e-59	6	Set
Uqcrb	1.25555e-63	0.399527	0.95	0.698	2.49867e-59	6	Uqcrb
Slc25a51	2.72125e-63	0.465825	0.964	0.778	5.41555e-59	6	Slc25a5
Ncapg	3.34392e-63	0.375652	0.353	0.059	6.65473e-59	6	Ncapg
Oaz1	3.36502e-63	0.28786	0.995	0.968	6.69672e-59	6	Oaz1
Eif5a	4.24773e-63	0.550224	0.979	0.858	8.45341e-59	6	Eif5a
Ssb	4.35113e-63	0.445633	0.916	0.65	8.65918e-59	6	Ssb
Mcm7	9.07049e-63	0.470463	0.489	0.129	1.80512e-58	6	Mcm7
Psma6	2.0446e-62	0.455728	0.85	0.502	4.06896e-58	6	Psma6
Dek	2.10846e-62	0.586189	0.854	0.577	4.19605e-58	6	Dek
Gm281121	2.34019e-62	0.273765	0.607	0.191	4.65722e-58	6	Gm28112
Dtymk	3.9896e-62	0.39222	0.635	0.257	7.93971e-58	6	Dtymk
Aurkb	4.5968e-62	0.443266	0.341	0.052	9.14808e-58	6	Aurkb
Cct3	5.0214e-62	0.502503	0.778	0.4	9.99309e-58	6	Cct3
Tipin	1.31524e-61	0.47528	0.586	0.202	2.61746e-57	6	Tipin
Hnrnpa11	1.32844e-61	0.415469	0.911	0.639	2.64372e-57	6	Hnrnpa1
Odc11	3.76226e-61	0.473712	0.719	0.319	7.48727e-57	6	Odc1
Nusap1	3.83858e-61	0.711735	0.349	0.064	7.63917e-57	6	Nusap1
Hbs1l1	5.03786e-61	0.343836	0.514	0.163	1.00258e-56	6	Hbs1l
Atp5e	1.12085e-60	0.322282	0.991	0.949	2.2306e-56	6	Atp5e
Pomp	1.48e-60	0.415002	0.94	0.72	2.94534e-56	6	Pomp
Hmgb1	2.83923e-60	0.528138	0.944	0.77	5.65035e-56	6	Hmgb1
Snx31	3.38093e-60	0.41616	0.918	0.61	6.7284e-56	6	Snx3
Mcm2	9.69747e-60	0.388734	0.468	0.129	1.92989e-55	6	Mcm2
Uhrf1	1.14813e-59	0.333391	0.38	0.079	2.28489e-55	6	Uhrf1
Sumo2	4.83442e-59	0.388837	0.983	0.883	9.62098e-55	6	Sumo2
Tpi12	5.16663e-59	0.480602	0.916	0.561	1.02821e-54	6	Tpi1
Nop58	8.48618e-59	0.501091	0.704	0.324	1.68883e-54	6	Nop58
Prc1	9.49444e-59	0.496921	0.36	0.073	1.88949e-54	6	Prc1
Sypl1	1.13713e-58	0.336239	0.59	0.184	2.263e-54	6	Sypl
Dut1	1.18443e-58	0.59704	0.757	0.397	2.35713e-54	6	Dut
Psma7	1.23896e-58	0.376764	0.95	0.76	2.46565e-54	6	Psma7
Rfc4	1.48642e-58	0.354925	0.427	0.118	2.95813e-54	6	Rfc4
Psme1	1.6376e-58	0.33339	0.978	0.874	3.259e-54	6	Psme1
Abracl1	2.45389e-58	0.361827	0.972	0.826	4.88349e-54	6	Abracl
Srsf7	2.79868e-58	0.493512	0.773	0.415	5.56965e-54	6	Srsf7
Tpx2	3.05403e-58	0.459618	0.348	0.059	6.07783e-54	6	Tpx2
Psma3	3.15419e-58	0.420932	0.942	0.711	6.27716e-54	6	Psma3
Itm2c1	4.46407e-58	0.382101	0.86	0.527	8.88394e-54	6	Itm2c
Sdf2l1	5.16602e-58	0.458154	0.666	0.28	1.02809e-53	6	Sdf2l1
Knl1	6.66534e-58	0.41121	0.314	0.05	1.32647e-53	6	Knl1
Dhfr	8.19511e-58	0.334334	0.374	0.083	1.63091e-53	6	Dhfr
Ywhae	9.9413e-58	0.419366	0.9	0.591	1.97842e-53	6	Ywhae
Atp5b	1.27042e-57	0.38767	0.959	0.82	2.52827e-53	6	Atp5b
Hnrnpu	1.56479e-57	0.413095	0.922	0.677	3.11409e-53	6	Hnrnpu
Tkt	2.09683e-57	0.435969	0.814	0.468	4.17289e-53	6	Tkt
Hdgf	2.33988e-57	0.430347	0.788	0.427	4.65659e-53	6	Hdgf
Psmb5	4.23818e-57	0.372304	0.829	0.504	8.43441e-53	6	Psmb5
Tacc3	5.32664e-57	0.393225	0.352	0.068	1.06006e-52	6	Tacc3
Ikzf41	6.45454e-57	0.277964	0.529	0.184	1.28452e-52	6	Ikzf4
Banf1	6.65115e-57	0.458117	0.782	0.401	1.32365e-52	6	Banf1
Hprt	7.95549e-57	0.395736	0.863	0.538	1.58322e-52	6	Hprt
Cenpf	1.11221e-56	0.667566	0.324	0.051	2.2134e-52	6	Cenpf
Ergic1	2.60329e-56	0.272331	0.398	0.108	5.1808e-52	6	Ergic1
Nudc	3.83754e-56	0.40519	0.783	0.427	7.63708e-52	6	Nudc
Cenpm	4.51523e-56	0.300817	0.329	0.059	8.98575e-52	6	Cenpm
Prelid3b	5.39107e-56	0.392444	0.666	0.264	1.07288e-51	6	Prelid3b
Slc15a31	5.82258e-56	0.378781	0.402	0.082	1.15875e-51	6	Slc15a3
Fen1	6.05596e-56	0.375307	0.471	0.128	1.2052e-51	6	Fen1
Ppp1r14b	6.09395e-56	0.523968	0.778	0.404	1.21276e-51	6	Ppp1r14b
Cdca3	6.46724e-56	0.400651	0.322	0.052	1.28705e-51	6	Cdca3
Ube2c	1.68846e-55	0.915219	0.368	0.087	3.36021e-51	6	Ube2c
Tfdp1	1.72229e-55	0.345846	0.478	0.156	3.42753e-51	6	Tfdp1
Cct8	2.28546e-55	0.4786	0.874	0.571	4.54829e-51	6	Cct8
Rfc3	2.29922e-55	0.345563	0.469	0.142	4.57568e-51	6	Rfc3
A430093F15Rik1	3.35466e-55	0.333765	0.614	0.234	6.67611e-51	6	A430093F15Rik
Ssr4	5.81417e-55	0.379144	0.941	0.689	1.15708e-50	6	Ssr4
Ccdc34	6.578e-55	0.415479	0.442	0.12	1.30909e-50	6	Ccdc34
Eif4e	9.83127e-55	0.337225	0.727	0.363	1.95652e-50	6	Eif4e
Snrpf	1.28415e-54	0.45031	0.897	0.597	2.55558e-50	6	Snrpf
Gbp31	2.19897e-54	0.341136	0.66	0.274	4.37618e-50	6	Gbp3
Uap1	2.3797e-54	0.317115	0.548	0.199	4.73585e-50	6	Uap1
Galk1	3.1e-54	0.396906	0.518	0.166	6.16931e-50	6	Galk1
Tmem109	4.06508e-54	0.302063	0.502	0.172	8.08992e-50	6	Tmem109
Atp5g3	5.62232e-54	0.421214	0.922	0.648	1.1189e-49	6	Atp5g3
Spcs1	8.57656e-54	0.342678	0.891	0.584	1.70682e-49	6	Spcs1
Rilpl21	1.01997e-53	0.394979	0.744	0.368	2.02983e-49	6	Rilpl2
Gadd45b1	1.06225e-53	0.313313	0.746	0.36	2.11399e-49	6	Gadd45b
Manf	1.25426e-53	0.490199	0.889	0.597	2.49611e-49	6	Manf
Uchl3	1.42884e-53	0.344856	0.618	0.249	2.84354e-49	6	Uchl3
Ssbp3	1.51941e-53	0.347911	0.688	0.327	3.02379e-49	6	Ssbp3
Psen21	2.62227e-53	0.29447	0.602	0.229	5.21857e-49	6	Psen2
Park7	2.91368e-53	0.418481	0.919	0.661	5.79852e-49	6	Park7
Hmgb3	3.31224e-53	0.336254	0.463	0.145	6.59169e-49	6	Hmgb3
Edf1	3.81349e-53	0.346568	0.939	0.716	7.58922e-49	6	Edf1
Pdia3	7.87984e-53	0.399213	0.924	0.717	1.56817e-48	6	Pdia3
Nhp2	9.65417e-53	0.491273	0.697	0.324	1.92128e-48	6	Nhp2
Pgam11	1.40863e-52	0.417594	0.916	0.616	2.80332e-48	6	Pgam1
Eif1ax	1.48967e-52	0.43407	0.83	0.466	2.96459e-48	6	Eif1ax
Rapsn1	1.92706e-52	0.254032	0.322	0.05	3.83505e-48	6	Rapsn
Eif2s1	3.14262e-52	0.39324	0.796	0.448	6.25412e-48	6	Eif2s1
Slc9a3r11	4.46618e-52	0.407407	0.802	0.438	8.88814e-48	6	Slc9a3r1
Gpx11	6.08391e-52	0.387331	0.807	0.457	1.21076e-47	6	Gpx1
Cct6a	6.22411e-52	0.445621	0.794	0.433	1.23866e-47	6	Cct6a
Txnl1	7.12868e-52	0.366389	0.831	0.491	1.41868e-47	6	Txnl1
Hist1h2ae	8.46795e-52	0.778112	0.388	0.103	1.68521e-47	6	Hist1h2ae
Slc36a3os	8.67725e-52	0.251562	0.334	0.063	1.72686e-47	6	Slc36a3os
Bcl2l11	8.71556e-52	0.357175	0.463	0.153	1.73448e-47	6	Bcl2l1
Icos1	9.76995e-52	0.337153	0.957	0.674	1.94432e-47	6	Icos
Cdc20	1.07588e-51	0.451406	0.333	0.062	2.14112e-47	6	Cdc20
Psmc3	1.10185e-51	0.327597	0.77	0.44	2.19279e-47	6	Psmc3
Psma1	1.1188e-51	0.381914	0.857	0.536	2.22652e-47	6	Psma1
Ndufab1	1.29886e-51	0.393426	0.768	0.41	2.58487e-47	6	Ndufab1
Ripk3	1.31766e-51	0.281387	0.434	0.122	2.62227e-47	6	Ripk3
Csrp1	1.53205e-51	0.317703	0.59	0.245	3.04893e-47	6	Csrp1
Hnrnpd	1.86936e-51	0.404401	0.896	0.63	3.72021e-47	6	Hnrnpd
Denr	2.83948e-51	0.417214	0.813	0.461	5.65085e-47	6	Denr
Usp1	4.09167e-51	0.330306	0.574	0.243	8.14284e-47	6	Usp1
Hacd3	6.52199e-51	0.295123	0.49	0.172	1.29794e-46	6	Hacd3
Slc25a191	7.79691e-51	0.292007	0.473	0.144	1.55166e-46	6	Slc25a19
Dnajb111	8.41503e-51	0.330336	0.758	0.404	1.67467e-46	6	Dnajb11
Rad51	1.16252e-50	0.351557	0.348	0.058	2.31353e-46	6	Rad51
Ndufb7	1.17423e-50	0.33394	0.94	0.714	2.33684e-46	6	Ndufb7
Cdv3	1.55052e-50	0.356997	0.726	0.37	3.08568e-46	6	Cdv3
Eed	1.62135e-50	0.348023	0.652	0.276	3.22665e-46	6	Eed
Mad2l1	1.71782e-50	0.317149	0.393	0.1	3.41864e-46	6	Mad2l1
Parp1	2.41852e-50	0.302963	0.463	0.146	4.8131e-46	6	Parp1
Dbi2	2.93199e-50	0.437578	0.821	0.487	5.83495e-46	6	Dbi
Nfkbia1	3.21217e-50	0.406048	0.928	0.676	6.39254e-46	6	Nfkbia
Clspn	4.4259e-50	0.358597	0.361	0.078	8.80798e-46	6	Clspn
H3f3a	4.58016e-50	0.287541	0.994	0.969	9.11498e-46	6	H3f3a
Prim1	5.975e-50	0.301233	0.378	0.091	1.18908e-45	6	Prim1
Uqcr11	6.07269e-50	0.390243	0.881	0.578	1.20853e-45	6	Uqcr11
Myb	6.31964e-50	0.28297	0.333	0.062	1.25767e-45	6	Myb
Knstrn	7.95993e-50	0.328695	0.329	0.077	1.58411e-45	6	Knstrn
2020-09-07	9.32908e-50	0.330719	0.931	0.693	1.85658e-45	6	2020-09-07
Cct5	1.56562e-49	0.445414	0.874	0.565	3.11574e-45	6	Cct5
Ddit41	1.91583e-49	0.456462	0.745	0.382	3.8127e-45	6	Ddit4
Rangap1	1.93905e-49	0.306805	0.557	0.219	3.85891e-45	6	Rangap1
Cdca7	2.02746e-49	0.306213	0.346	0.072	4.03484e-45	6	Cdca7
Gar1	2.69918e-49	0.381516	0.57	0.222	5.37164e-45	6	Gar1
Atp5o	3.039e-49	0.361886	0.924	0.697	6.0479e-45	6	Atp5o
Uqcrq	3.63329e-49	0.34365	0.935	0.713	7.23061e-45	6	Uqcrq
Eif3b	4.42014e-49	0.364611	0.628	0.281	8.79652e-45	6	Eif3b
Ssrp1	4.46964e-49	0.413935	0.756	0.413	8.89503e-45	6	Ssrp1
Incenp	6.23856e-49	0.394093	0.395	0.116	1.24153e-44	6	Incenp
Mrpl17	6.96111e-49	0.343024	0.596	0.249	1.38533e-44	6	Mrpl17
Fbxo5	7.09907e-49	0.413777	0.312	0.061	1.41279e-44	6	Fbxo5
Ahsa1	7.77685e-49	0.332908	0.76	0.419	1.54767e-44	6	Ahsa1
Dnajc9	8.05433e-49	0.450785	0.794	0.468	1.60289e-44	6	Dnajc9
2210016F16Rik	1.18386e-48	0.335508	0.663	0.29	2.356e-44	6	2210016F16Rik
Sae1	1.24201e-48	0.349867	0.689	0.329	2.47172e-44	6	Sae1
Map2k3	1.27027e-48	0.366118	0.693	0.314	2.52797e-44	6	Map2k3
Smc41	1.27063e-48	0.457578	0.803	0.529	2.52868e-44	6	Smc4
Cdkn2c	1.58804e-48	0.292672	0.404	0.135	3.16036e-44	6	Cdkn2c
Ubl4a	1.8533e-48	0.271416	0.572	0.237	3.68825e-44	6	Ubl4a
Tcp1	2.23211e-48	0.389608	0.814	0.471	4.44213e-44	6	Tcp1
Snrpa	2.3378e-48	0.309485	0.58	0.242	4.65246e-44	6	Snrpa
Hist1h2ap	2.47066e-48	0.826769	0.364	0.1	4.91686e-44	6	Hist1h2ap
Mpp6	2.50974e-48	0.326376	0.543	0.209	4.99462e-44	6	Mpp6
Psmd7	2.63057e-48	0.310344	0.712	0.369	5.23509e-44	6	Psmd7
Mtx2	3.15792e-48	0.302217	0.529	0.182	6.28457e-44	6	Mtx2
Apitd1	3.36553e-48	0.25008	0.331	0.071	6.69773e-44	6	Apitd1
Cenpe	4.05179e-48	0.428699	0.314	0.053	8.06347e-44	6	Cenpe
Baz1b	4.57128e-48	0.300656	0.609	0.269	9.09731e-44	6	Baz1b
Hist1h1b	4.63021e-48	0.522075	0.305	0.062	9.21457e-44	6	Hist1h1b
Pbdc1	5.68338e-48	0.329121	0.623	0.262	1.13105e-43	6	Pbdc1
H2afx	6.75393e-48	0.592617	0.492	0.192	1.3441e-43	6	H2afx
Psmb4	7.65685e-48	0.387806	0.892	0.594	1.52379e-43	6	Psmb4
Erg28	8.69163e-48	0.356826	0.623	0.267	1.72972e-43	6	Erg28
Ctsb1	9.15225e-48	0.358831	0.849	0.523	1.82139e-43	6	Ctsb
Hist1h3c	9.26187e-48	0.276846	0.254	0.031	1.8432e-43	6	Hist1h3c
Cnih4	1.12415e-47	0.353505	0.674	0.312	2.23717e-43	6	Cnih4
Ube2e3	1.22963e-47	0.285062	0.483	0.162	2.4471e-43	6	Ube2e3
Kif11	1.41029e-47	0.351026	0.294	0.058	2.80662e-43	6	Kif11
G3bp1	1.53227e-47	0.444009	0.85	0.502	3.04938e-43	6	G3bp1
Mdh2	2.14687e-47	0.368936	0.926	0.661	4.27248e-43	6	Mdh2
Pgk12	2.26477e-47	0.389318	0.953	0.704	4.50712e-43	6	Pgk1
Cox7b	2.60096e-47	0.355542	0.951	0.787	5.17616e-43	6	Cox7b
Ube2l3	3.2657e-47	0.356008	0.888	0.603	6.49908e-43	6	Ube2l3
Snrpb	4.01181e-47	0.365937	0.921	0.663	7.98389e-43	6	Snrpb
Lsm6	5.13243e-47	0.366151	0.785	0.429	1.02141e-42	6	Lsm6
Pla2g12a	6.7896e-47	0.273952	0.364	0.095	1.3512e-42	6	Pla2g12a
Pycard	8.35345e-47	0.375104	0.785	0.441	1.66242e-42	6	Pycard
Iigp11	8.77447e-47	0.30474	0.522	0.201	1.74621e-42	6	Iigp1
Nrm	1.28375e-46	0.290179	0.389	0.106	2.55478e-42	6	Nrm
Nucks1	1.31896e-46	0.466085	0.808	0.512	2.62486e-42	6	Nucks1
Hnrnpf	1.99942e-46	0.307482	0.976	0.895	3.97905e-42	6	Hnrnpf
Gins2	2.66864e-46	0.323556	0.37	0.074	5.31087e-42	6	Gins2
Ddost	2.78706e-46	0.339906	0.811	0.458	5.54652e-42	6	Ddost
Myo1g	2.78881e-46	0.279599	0.616	0.27	5.55001e-42	6	Myo1g
Actr3	3.73709e-46	0.294786	0.968	0.835	7.43718e-42	6	Actr3
Spc25	4.05032e-46	0.289458	0.282	0.048	8.06054e-42	6	Spc25
Lmna1	4.21719e-46	0.359643	0.472	0.156	8.39263e-42	6	Lmna
Erdr1	4.96272e-46	0.451376	0.863	0.547	9.87631e-42	6	Erdr1
U2af1	7.49994e-46	0.370653	0.793	0.461	1.49256e-41	6	U2af1
Nap1l11	8.08567e-46	0.442315	0.839	0.511	1.60913e-41	6	Nap1l1
Strap	1.35771e-45	0.337732	0.763	0.416	2.70198e-41	6	Strap
Nuf2	1.64272e-45	0.250719	0.246	0.032	3.26918e-41	6	Nuf2
Diaph3	1.90688e-45	0.270648	0.286	0.047	3.79489e-41	6	Diaph3
Mrps61	2.28264e-45	0.253751	0.576	0.268	4.54269e-41	6	Mrps6
Psmd14	2.50053e-45	0.297619	0.74	0.399	4.9763e-41	6	Psmd14
Tuba1c	3.16024e-45	0.445646	0.445	0.156	6.28919e-41	6	Tuba1c
Ndufa11	3.16443e-45	0.348625	0.879	0.559	6.29753e-41	6	Ndufa11
Krtcap2	3.19148e-45	0.357373	0.95	0.758	6.35136e-41	6	Krtcap2
Uqcr10	4.19345e-45	0.380044	0.925	0.703	8.34538e-41	6	Uqcr10
Psat1	6.3399e-45	0.281012	0.417	0.126	1.2617e-40	6	Psat1
Ptprcap1	6.61413e-45	0.349366	0.982	0.828	1.31628e-40	6	Ptprcap
Reep51	7.2527e-45	0.343737	0.964	0.737	1.44336e-40	6	Reep5
Dnmt1	7.47326e-45	0.33781	0.479	0.173	1.48725e-40	6	Dnmt1
Pdap1	1.16991e-44	0.357161	0.762	0.406	2.32823e-40	6	Pdap1
Ndufa5	2.17844e-44	0.354174	0.793	0.455	4.33531e-40	6	Ndufa5
Smarca5	2.97139e-44	0.339552	0.794	0.458	5.91336e-40	6	Smarca5
Nudt5	4.01656e-44	0.276517	0.567	0.254	7.99335e-40	6	Nudt5
Cct2	6.62314e-44	0.355864	0.899	0.652	1.31807e-39	6	Cct2
Snx21	7.57395e-44	0.319275	0.686	0.325	1.50729e-39	6	Snx2
Cenph	7.84469e-44	0.260026	0.291	0.049	1.56117e-39	6	Cenph
Psmd1	7.92619e-44	0.268248	0.585	0.268	1.57739e-39	6	Psmd1
Pttg1	8.95701e-44	0.547342	0.436	0.152	1.78254e-39	6	Pttg1
Spint21	1.00343e-43	0.253422	0.697	0.364	1.99692e-39	6	Spint2
Gde1	1.0176e-43	0.257552	0.498	0.188	2.02513e-39	6	Gde1
Serpina3g1	1.25277e-43	0.35096	0.508	0.211	2.49314e-39	6	Serpina3g
Cd21	1.26526e-43	0.294007	0.985	0.839	2.51799e-39	6	Cd2
Sell2	1.50201e-43	0.27764	0.636	0.261	2.98914e-39	6	Sell
Penk1	1.83743e-43	1.27973	0.292	0.069	3.65667e-39	6	Penk
Mrpl18	2.03662e-43	0.35796	0.778	0.453	4.05308e-39	6	Mrpl18
Dnajc2	2.44651e-43	0.351872	0.749	0.405	4.8688e-39	6	Dnajc2
Cep55	2.97542e-43	0.273617	0.274	0.05	5.92138e-39	6	Cep55
Psmc5	3.87013e-43	0.336343	0.786	0.432	7.70195e-39	6	Psmc5
Orc6	4.09998e-43	0.27405	0.418	0.131	8.15937e-39	6	Orc6
Tubb4b	4.21759e-43	0.636642	0.608	0.307	8.39343e-39	6	Tubb4b
2010107E04Rik	4.75234e-43	0.292272	0.959	0.794	9.45763e-39	6	2010107E04Rik
Canx	5.63534e-43	0.369162	0.825	0.483	1.12149e-38	6	Canx
Lyar	5.86941e-43	0.398046	0.642	0.278	1.16807e-38	6	Lyar
Exosc8	9.38542e-43	0.347641	0.699	0.344	1.86779e-38	6	Exosc8
Ccnb1	1.10352e-42	0.380689	0.268	0.044	2.19612e-38	6	Ccnb1
Rpn1	1.21265e-42	0.288917	0.537	0.22	2.41329e-38	6	Rpn1
Crlf21	1.27628e-42	0.286215	0.81	0.465	2.53993e-38	6	Crlf2
Hnrnpk	1.35017e-42	0.321687	0.957	0.776	2.68698e-38	6	Hnrnpk
Hpf1	1.84005e-42	0.37383	0.721	0.367	3.66189e-38	6	Hpf1
Snrpc	1.99945e-42	0.253752	0.714	0.392	3.9791e-38	6	Snrpc
Sdf42	2.41393e-42	0.325492	0.974	0.799	4.80396e-38	6	Sdf4
Ap3b11	2.49286e-42	0.397501	0.639	0.303	4.96104e-38	6	Ap3b1
Sumo3	2.62903e-42	0.352741	0.649	0.275	5.23204e-38	6	Sumo3
Rbmxl1	2.81051e-42	0.348438	0.596	0.24	5.5932e-38	6	Rbmxl1
Rad51ap1	2.91133e-42	0.259189	0.275	0.045	5.79384e-38	6	Rad51ap1
Isg202	4.16256e-42	0.263888	0.665	0.307	8.2839e-38	6	Isg20
Kif20b	5.32233e-42	0.302011	0.343	0.086	1.0592e-37	6	Kif20b
Eif3c	5.52665e-42	0.355234	0.856	0.572	1.09986e-37	6	Eif3c
Ddx39b	5.74177e-42	0.347773	0.828	0.522	1.14267e-37	6	Ddx39b
AI662270	7.56476e-42	0.309725	0.809	0.491	1.50546e-37	6	AI662270
Itgb71	7.63971e-42	0.267181	0.882	0.509	1.52038e-37	6	Itgb7
Sec11c	9.40503e-42	0.379438	0.881	0.619	1.87169e-37	6	Sec11c
Hmmr	1.00065e-41	0.345962	0.256	0.04	1.99139e-37	6	Hmmr
C1qbp	1.17333e-41	0.403577	0.673	0.366	2.33504e-37	6	C1qbp
Glipr11	1.31455e-41	0.315775	0.615	0.291	2.61609e-37	6	Glipr1
Calm3	1.41706e-41	0.333905	0.857	0.557	2.8201e-37	6	Calm3
Ruvbl1	1.56832e-41	0.278064	0.522	0.201	3.12111e-37	6	Ruvbl1
Lsm4	1.68989e-41	0.348743	0.814	0.504	3.36304e-37	6	Lsm4
Psmc2	2.70653e-41	0.299442	0.711	0.35	5.38626e-37	6	Psmc2
Pbk	2.72136e-41	0.285192	0.254	0.035	5.41577e-37	6	Pbk
Prpf40a	2.78631e-41	0.316788	0.827	0.492	5.54503e-37	6	Prpf40a
Cox7a2	3.3599e-41	0.305824	0.962	0.799	6.68653e-37	6	Cox7a2
Esco2	3.85888e-41	0.309519	0.246	0.035	7.67956e-37	6	Esco2
Alyref	3.95871e-41	0.425206	0.705	0.34	7.87822e-37	6	Alyref
Racgap1	5.62267e-41	0.381272	0.388	0.122	1.11897e-36	6	Racgap1
Hif1a1	7.29363e-41	0.294252	0.943	0.692	1.45151e-36	6	Hif1a
Psmd13	8.04599e-41	0.272636	0.739	0.416	1.60123e-36	6	Psmd13
Nrip11	9.06342e-41	0.286959	0.594	0.284	1.80371e-36	6	Nrip1
Nop56	1.05595e-40	0.354533	0.587	0.281	2.10145e-36	6	Nop56
Ncapd3	1.09925e-40	0.304884	0.442	0.15	2.18761e-36	6	Ncapd3
Timm13	1.37072e-40	0.369984	0.856	0.531	2.72786e-36	6	Timm13
Lap3	1.67766e-40	0.252072	0.383	0.118	3.3387e-36	6	Lap3
Anapc15	1.76566e-40	0.251856	0.433	0.148	3.51383e-36	6	Anapc15
Mrpl12	1.79181e-40	0.323526	0.638	0.319	3.56587e-36	6	Mrpl12
Eif4a3	1.95318e-40	0.304089	0.727	0.384	3.88702e-36	6	Eif4a3
Mrpl42	2.3374e-40	0.297957	0.729	0.37	4.65167e-36	6	Mrpl42
Rbbp4	2.67046e-40	0.312632	0.784	0.485	5.31448e-36	6	Rbbp4
Hspa9	2.89981e-40	0.323772	0.575	0.269	5.77091e-36	6	Hspa9
Psmb9	2.93525e-40	0.33175	0.969	0.841	5.84145e-36	6	Psmb9
Ube2n	5.71299e-40	0.332744	0.878	0.564	1.13694e-35	6	Ube2n
Tex30	6.02121e-40	0.253139	0.455	0.154	1.19828e-35	6	Tex30
Pdia41	6.45664e-40	0.284261	0.67	0.337	1.28494e-35	6	Pdia4
Actb	7.03899e-40	0.266983	1	0.999	1.40083e-35	6	Actb
Dazap1	7.20187e-40	0.287934	0.735	0.402	1.43324e-35	6	Dazap1
Ndufb8	7.75705e-40	0.307824	0.854	0.568	1.54373e-35	6	Ndufb8
Elob	7.99671e-40	0.282336	0.977	0.835	1.59143e-35	6	Elob
Cyb5a1	8.57837e-40	0.304494	0.866	0.567	1.70718e-35	6	Cyb5a
Grb21	8.97744e-40	0.270614	0.868	0.555	1.7866e-35	6	Grb2
Ncf41	9.70304e-40	0.331861	0.818	0.478	1.931e-35	6	Ncf4
Rfc5	1.01212e-39	0.312436	0.431	0.124	2.01422e-35	6	Rfc5
Mrto4	1.14007e-39	0.309464	0.531	0.226	2.26886e-35	6	Mrto4
Topbp1	1.17836e-39	0.263402	0.423	0.148	2.34506e-35	6	Topbp1
Atp5k	1.46598e-39	0.341686	0.906	0.665	2.91745e-35	6	Atp5k
Nsun2	1.87008e-39	0.275573	0.498	0.208	3.72164e-35	6	Nsun2
Smarcc1	1.89492e-39	0.260383	0.492	0.187	3.77108e-35	6	Smarcc1
Dynll2	2.97028e-39	0.277525	0.593	0.28	5.91115e-35	6	Dynll2
Cdk4	3.70674e-39	0.329469	0.62	0.299	7.37677e-35	6	Cdk4
Ccr21	3.91885e-39	0.271664	0.73	0.355	7.7989e-35	6	Ccr2
Stip1	3.94317e-39	0.280448	0.643	0.3	7.84729e-35	6	Stip1
Mcm4	8.29914e-39	0.311533	0.48	0.181	1.65161e-34	6	Mcm4
Ciapin1	1.10742e-38	0.381839	0.719	0.375	2.20388e-34	6	Ciapin1
Ywhah	1.3787e-38	0.33926	0.856	0.554	2.74374e-34	6	Ywhah
Cd61	1.51334e-38	0.314358	0.83	0.477	3.01169e-34	6	Cd6
Uqcrc1	1.65931e-38	0.290872	0.71	0.379	3.30218e-34	6	Uqcrc1
Naa50	1.97827e-38	0.301077	0.654	0.307	3.93695e-34	6	Naa50
Psmb6	1.99478e-38	0.270397	0.846	0.541	3.9698e-34	6	Psmb6
Psmb3	2.44928e-38	0.344201	0.948	0.719	4.87432e-34	6	Psmb3
Hcls11	2.68919e-38	0.321095	0.864	0.572	5.35176e-34	6	Hcls1
Mapkapk21	3.73676e-38	0.296556	0.703	0.357	7.43652e-34	6	Mapkapk2
Hdac1	4.10983e-38	0.273141	0.609	0.281	8.17898e-34	6	Hdac1
Yif1b	4.8712e-38	0.258271	0.541	0.218	9.69417e-34	6	Yif1b
Agfg11	5.70209e-38	0.278214	0.764	0.445	1.13477e-33	6	Agfg1
Snrpd31	7.36191e-38	0.302447	0.801	0.474	1.46509e-33	6	Snrpd3
Ppid	7.40507e-38	0.260999	0.502	0.205	1.47368e-33	6	Ppid
Psmb7	7.86567e-38	0.277247	0.751	0.402	1.56535e-33	6	Psmb7
Ddx21	1.49418e-37	0.322602	0.705	0.392	2.97356e-33	6	Ddx21
Psma5	1.57851e-37	0.372674	0.82	0.492	3.1414e-33	6	Psma5
Ndufc1	1.84173e-37	0.297628	0.772	0.455	3.66522e-33	6	Ndufc1
Nxt1	2.18427e-37	0.257318	0.537	0.217	4.34691e-33	6	Nxt1
Hspa4	2.74579e-37	0.302317	0.7	0.376	5.46439e-33	6	Hspa4
Rad21	3.19462e-37	0.310838	0.574	0.288	6.3576e-33	6	Rad21
Cenpw	3.67899e-37	0.32887	0.455	0.167	7.32155e-33	6	Cenpw
Pgp	4.86081e-37	0.260724	0.564	0.245	9.67349e-33	6	Pgp
Cbx5	5.26436e-37	0.260095	0.485	0.187	1.04766e-32	6	Cbx5
Psmd8	6.18467e-37	0.329597	0.852	0.553	1.23081e-32	6	Psmd8
Hsp90ab1	6.38397e-37	0.289287	0.996	0.968	1.27047e-32	6	Hsp90ab1
Cox5b1	7.95872e-37	0.299407	0.954	0.788	1.58386e-32	6	Cox5b
Tmem2561	8.38685e-37	0.277209	0.751	0.427	1.66907e-32	6	Tmem256
Psip1	8.67069e-37	0.350887	0.713	0.368	1.72555e-32	6	Psip1
Prmt1	9.43734e-37	0.405973	0.753	0.39	1.87813e-32	6	Prmt1
Tgfb11	1.06612e-36	0.285373	0.782	0.434	2.12168e-32	6	Tgfb1
Metap2	1.08227e-36	0.331793	0.732	0.405	2.15383e-32	6	Metap2
Ywhaq	1.23475e-36	0.348921	0.9	0.632	2.45728e-32	6	Ywhaq
Arpp19	1.34306e-36	0.316138	0.919	0.682	2.67282e-32	6	Arpp19
Supt16	1.39494e-36	0.273293	0.644	0.331	2.77606e-32	6	Supt16
Dcun1d5	1.62909e-36	0.290031	0.787	0.45	3.24204e-32	6	Dcun1d5
Sf3b5	1.94666e-36	0.282282	0.844	0.56	3.87406e-32	6	Sf3b5
Rbm8a	2.75781e-36	0.292231	0.821	0.495	5.48831e-32	6	Rbm8a
Ube2s	3.3327e-36	0.43484	0.84	0.576	6.63241e-32	6	Ube2s
Calm1	5.666e-36	0.28139	0.986	0.932	1.12759e-31	6	Calm1
Fh1	5.85757e-36	0.262322	0.5	0.193	1.16571e-31	6	Fh1
Uba2	8.09027e-36	0.290019	0.668	0.341	1.61004e-31	6	Uba2
Nsd2	1.20276e-35	0.274144	0.506	0.227	2.39361e-31	6	Nsd2
Eif1a	1.22178e-35	0.31452	0.619	0.282	2.43146e-31	6	Eif1a
H2afv	1.53521e-35	0.586887	0.745	0.513	3.05523e-31	6	H2afv
Ndufc2	2.14406e-35	0.355914	0.817	0.5	4.26689e-31	6	Ndufc2
Mrpl13	2.21109e-35	0.260246	0.668	0.346	4.40028e-31	6	Mrpl13
Anapc5	2.35644e-35	0.284773	0.58	0.282	4.68956e-31	6	Anapc5
Psmd2	2.54021e-35	0.273586	0.726	0.387	5.05528e-31	6	Psmd2
Serp11	2.66185e-35	0.318229	0.822	0.489	5.29735e-31	6	Serp1
Atp5j	2.74272e-35	0.312248	0.953	0.763	5.45829e-31	6	Atp5j
Fbl	4.07981e-35	0.378222	0.713	0.393	8.11923e-31	6	Fbl
Abcf1	4.74608e-35	0.263987	0.661	0.329	9.44518e-31	6	Abcf1
Hmgn5	4.76811e-35	0.276487	0.479	0.186	9.48902e-31	6	Hmgn5
Atp5f11	5.38634e-35	0.274483	0.946	0.759	1.07193e-30	6	Atp5f1
Snrpd2	7.55305e-35	0.323192	0.889	0.623	1.50313e-30	6	Snrpd2
Gnas	8.40442e-35	0.26132	0.987	0.904	1.67256e-30	6	Gnas
Arf1	1.20883e-34	0.2983	0.95	0.757	2.40569e-30	6	Arf1
Atp5j2	1.71356e-34	0.291189	0.972	0.854	3.41015e-30	6	Atp5j2
Ehd1	1.83951e-34	0.272472	0.611	0.291	3.6608e-30	6	Ehd1
Dkc1	2.19145e-34	0.259538	0.458	0.193	4.36121e-30	6	Dkc1
Bub3	2.22866e-34	0.313517	0.7	0.405	4.43525e-30	6	Bub3
Ndufv2	2.2719e-34	0.28194	0.792	0.486	4.5213e-30	6	Ndufv2
Nolc1	2.31754e-34	0.317635	0.475	0.196	4.61214e-30	6	Nolc1
Zfp36l11	2.5009e-34	0.275629	0.922	0.679	4.97705e-30	6	Zfp36l1
Cyc1	2.70029e-34	0.27148	0.687	0.381	5.37386e-30	6	Cyc1
Bcap29	2.83277e-34	0.266667	0.56	0.257	5.6375e-30	6	Bcap29
Ptpn7	3.13053e-34	0.316603	0.635	0.312	6.23007e-30	6	Ptpn7
Stoml2	4.22316e-34	0.286837	0.559	0.226	8.40451e-30	6	Stoml2
Ptges3	9.39774e-34	0.285499	0.79	0.468	1.87024e-29	6	Ptges3
1110008F13Rik	9.8323e-34	0.266519	0.736	0.415	1.95673e-29	6	1110008F13Rik
Gspt1	1.00658e-33	0.288363	0.629	0.305	2.00319e-29	6	Gspt1
Cops6	1.45888e-33	0.281311	0.751	0.429	2.90332e-29	6	Cops6
Polr2f	2.39675e-33	0.314236	0.745	0.418	4.76977e-29	6	Polr2f
Higd1a	2.92796e-33	0.294999	0.873	0.595	5.82693e-29	6	Higd1a
Ssr2	3.06625e-33	0.322241	0.723	0.391	6.10215e-29	6	Ssr2
Mrpl20	3.41336e-33	0.252492	0.726	0.404	6.79294e-29	6	Mrpl20
Vcp	5.66699e-33	0.254799	0.783	0.468	1.12779e-28	6	Vcp
Clic1	5.93665e-33	0.303767	0.989	0.894	1.18145e-28	6	Clic1
Lockd	6.60157e-33	0.316981	0.365	0.123	1.31378e-28	6	Lockd
Uqcc2	1.28042e-32	0.295319	0.761	0.432	2.54816e-28	6	Uqcc2
Rpa3	1.37145e-32	0.275659	0.578	0.262	2.72933e-28	6	Rpa3
Tmem14c	1.41335e-32	0.296319	0.788	0.493	2.81272e-28	6	Tmem14c
Syncrip	1.65038e-32	0.272322	0.698	0.379	3.28443e-28	6	Syncrip
Lsm3	1.96968e-32	0.299609	0.585	0.257	3.91987e-28	6	Lsm3
Lman2	2.44909e-32	0.297236	0.823	0.492	4.87394e-28	6	Lman2
Ostc	2.76756e-32	0.314444	0.846	0.543	5.50772e-28	6	Ostc
Phb	3.68077e-32	0.283797	0.577	0.291	7.32511e-28	6	Phb
Areg1	3.91413e-32	0.385895	0.264	0.076	7.78952e-28	6	Areg
Hspa5	3.92063e-32	0.319339	0.957	0.789	7.80244e-28	6	Hspa5
Gnb21	4.55221e-32	0.298574	0.929	0.74	9.05936e-28	6	Gnb2
Pebp1	5.15596e-32	0.32887	0.879	0.607	1.02609e-27	6	Pebp1
Vdac3	6.75082e-32	0.271924	0.729	0.415	1.34348e-27	6	Vdac3
Lsm7	8.87116e-32	0.265281	0.586	0.281	1.76545e-27	6	Lsm7
Sem1	1.04244e-31	0.261812	0.972	0.845	2.07456e-27	6	Sem1
St13	2.3727e-31	0.302573	0.828	0.534	4.72192e-27	6	St13
Atp5g1	2.469e-31	0.367699	0.858	0.58	4.91356e-27	6	Atp5g1
Prdx2	2.69022e-31	0.276113	0.762	0.477	5.35381e-27	6	Prdx2
Ak2	2.77297e-31	0.269794	0.695	0.357	5.51848e-27	6	Ak2
Hnrnpc	3.5712e-31	0.317304	0.836	0.528	7.10705e-27	6	Hnrnpc
Tmed101	3.77212e-31	0.299658	0.819	0.51	7.5069e-27	6	Tmed10
Rpn2	6.01837e-31	0.25459	0.743	0.417	1.19771e-26	6	Rpn2
Rheb	7.43912e-31	0.283268	0.783	0.443	1.48046e-26	6	Rheb
Actg11	1.0263e-30	0.266963	0.999	0.992	2.04244e-26	6	Actg1
Rfc2	1.20086e-30	0.266365	0.583	0.293	2.38984e-26	6	Rfc2
Vim1	1.5496e-30	0.38966	0.943	0.824	3.08386e-26	6	Vim
Tap11	1.90107e-30	0.287204	0.869	0.613	3.78333e-26	6	Tap1
Serinc31	1.96345e-30	0.316194	0.856	0.601	3.90746e-26	6	Serinc3
Eif4h	2.03871e-30	0.263251	0.764	0.456	4.05724e-26	6	Eif4h
Atp5a1	3.16e-30	0.289743	0.926	0.722	6.28872e-26	6	Atp5a1
Casp31	3.29167e-30	0.26369	0.678	0.389	6.55075e-26	6	Casp3
Psmd12	4.0471e-30	0.260745	0.708	0.378	8.05414e-26	6	Psmd12
Chchd1	4.83285e-30	0.268854	0.679	0.362	9.61785e-26	6	Chchd1
Ndufs6	5.52448e-30	0.263461	0.822	0.527	1.09943e-25	6	Ndufs6
Atpif1	5.66522e-30	0.27522	0.747	0.46	1.12743e-25	6	Atpif1
Pcbp1	6.80755e-30	0.306985	0.857	0.569	1.35477e-25	6	Pcbp1
Hspd1	8.76114e-30	0.309358	0.826	0.557	1.74355e-25	6	Hspd1
Zc3h15	1.09669e-29	0.272244	0.81	0.512	2.18253e-25	6	Zc3h15
Lcp1	1.93963e-29	0.29825	0.958	0.78	3.86005e-25	6	Lcp1
Slbp	2.18498e-29	0.382895	0.676	0.374	4.34832e-25	6	Slbp
Fam49b	2.63221e-29	0.292425	0.915	0.676	5.23836e-25	6	Fam49b
Sf3b6	2.66508e-29	0.27981	0.881	0.62	5.30377e-25	6	Sf3b6
Eif3a	3.27836e-29	0.282616	0.825	0.551	6.52426e-25	6	Eif3a
Rac11	4.08508e-29	0.257912	0.947	0.761	8.12971e-25	6	Rac1
Eif2s2	1.27784e-28	0.255443	0.863	0.624	2.54303e-24	6	Eif2s2
Lsm5	1.37197e-28	0.363776	0.823	0.555	2.73036e-24	6	Lsm5
Ebna1bp2	1.51434e-28	0.279885	0.647	0.338	3.0137e-24	6	Ebna1bp2
Cd481	2.05344e-28	0.257061	0.855	0.588	4.08656e-24	6	Cd48
Eif5b	2.71187e-28	0.284621	0.783	0.493	5.39689e-24	6	Eif5b
Taldo1	3.39774e-28	0.261231	0.881	0.641	6.76185e-24	6	Taldo1
Tap21	5.4113e-28	0.251011	0.844	0.555	1.0769e-23	6	Tap2
Igkc	2.20765e-27	0.388889	0.153	0.03	4.39345e-23	6	Igkc
Ndufb9	4.03286e-27	0.281356	0.876	0.646	8.0258e-23	6	Ndufb9
Mtdh1	4.69709e-27	0.261782	0.825	0.538	9.34767e-23	6	Mtdh
Hspe1	7.16434e-27	0.26342	0.938	0.774	1.42578e-22	6	Hspe1
Polr2l	7.74544e-27	0.26675	0.723	0.414	1.54142e-22	6	Polr2l
Chmp2a1	9.04134e-27	0.275881	0.889	0.618	1.79932e-22	6	Chmp2a
Snu13	2.15632e-26	0.269115	0.801	0.524	4.29128e-22	6	Snu13
Cct7	2.62513e-26	0.328806	0.867	0.569	5.22428e-22	6	Cct7
Rps210	6.34859e-26	0.272829	0.992	0.966	1.26343e-21	6	Rps2
Npm1	6.39997e-26	0.416981	0.985	0.923	1.27366e-21	6	Npm1
1810037I17Rik	7.46273e-26	0.291415	0.91	0.703	1.48516e-21	6	1810037I17Rik
Slc25a3	9.15433e-25	0.255649	0.969	0.825	1.8218e-20	6	Slc25a3
Ube2i	1.60978e-24	0.271046	0.94	0.75	3.20363e-20	6	Ube2i
Ltf1	3.56019e-24	0.432006	0.169	0.033	7.08513e-20	6	Ltf
Mrpl33	3.79764e-24	0.276663	0.94	0.722	7.55769e-20	6	Mrpl33
Smc1a	7.67895e-24	0.279976	0.61	0.349	1.52819e-19	6	Smc1a
Rsl1d1	1.11499e-23	0.261495	0.701	0.418	2.21894e-19	6	Rsl1d1
Cnbp	1.59481e-23	0.26458	0.968	0.871	3.17384e-19	6	Cnbp
Jpt1	2.33367e-23	0.303545	0.894	0.68	4.64424e-19	6	Jpt1
Magoh	5.1084e-23	0.288882	0.821	0.513	1.01662e-18	6	Magoh
Snrnp40	9.80312e-23	0.267634	0.621	0.301	1.95092e-18	6	Snrnp40
Phb21	1.19873e-22	0.303249	0.799	0.51	2.3856e-18	6	Phb2
Sfpq	3.31419e-22	0.264045	0.763	0.473	6.59558e-18	6	Sfpq
Cenpa1	2.16283e-21	0.418545	0.538	0.349	4.30424e-17	6	Cenpa
Tomm5	1.43555e-20	0.29074	0.726	0.474	2.85689e-16	6	Tomm5
Mt11	9.14791e-17	0.378089	0.31	0.133	1.82053e-12	6	Mt1
S100a101	2.42593e-15	0.291338	0.97	0.923	4.82783e-11	6	S100a10
Arl6ip1	1.47019e-10	0.306816	0.922	0.795	2.92583e-06	6	Arl6ip1
Cd7	3.92292e-198	1.8966	0.737	0.093	7.80701e-194	7	Cd7
Fcer1g1	5.29511e-181	1.56432	0.719	0.092	1.05378e-176	7	Fcer1g
Ly6c21	1.16507e-179	1.483	0.858	0.244	2.3186e-175	7	Ly6c2
Xcl11	3.7343e-176	1.48876	0.796	0.161	7.43163e-172	7	Xcl1
Ctsw3	2.04918e-143	0.929096	0.938	0.491	4.07808e-139	7	Ctsw
Tmsb10	2.90616e-123	0.475008	0.999	0.997	5.78355e-119	7	Tmsb10
Tyrobp	9.14993e-121	1.69251	0.467	0.018	1.82093e-116	7	Tyrobp
Ly6c11	1.09877e-115	1.01469	0.753	0.242	2.18666e-111	7	Ly6c1
Tcrg-C4	1.97235e-98	0.78585	0.403	0.011	3.92517e-94	7	Tcrg-C4
Bcl22	2.52819e-94	0.807772	0.809	0.436	5.03136e-90	7	Bcl2
Tcrg-C21	3.19348e-93	0.847267	0.425	0.048	6.35535e-89	7	Tcrg-C2
Cd1602	1.67354e-84	0.91004	0.595	0.2	3.33052e-80	7	Cd160
Klra7	3.39158e-83	1.11409	0.365	0.038	6.74959e-79	7	Klra7
Klra13-ps	4.59086e-80	1.04282	0.361	0.039	9.13626e-76	7	Klra13-ps
Rpl381	3.85956e-75	0.272775	0.999	0.995	7.6809e-71	7	Rpl38
Atp1b11	6.49011e-75	0.662879	0.394	0.046	1.2916e-70	7	Atp1b1
Klra1	3.99226e-72	0.987666	0.277	0.002	7.94501e-68	7	Klra1
Klra31	1.00235e-70	0.991017	0.306	0.026	1.99478e-66	7	Klra3
Evl1	2.94583e-69	0.666892	0.718	0.363	5.86249e-65	7	Evl
Klra51	5.15727e-68	1.05571	0.414	0.075	1.02635e-63	7	Klra5
Ncr1	2.35189e-67	1.12526	0.257	0.003	4.68049e-63	7	Ncr1
Samd3	3.13414e-61	0.595538	0.378	0.07	6.23725e-57	7	Samd3
Klrd12	9.28447e-60	0.436819	0.904	0.474	1.8477e-55	7	Klrd1
mt-Nd21	2.44009e-58	0.411653	0.989	0.949	4.85603e-54	7	mt-Nd2
Klrb1f	7.91793e-58	0.507845	0.251	0.014	1.57575e-53	7	Klrb1f
mt-Nd11	5.16578e-57	0.368087	0.991	0.963	1.02804e-52	7	mt-Nd1
Qpct	2.1353e-52	0.446059	0.315	0.056	4.24945e-48	7	Qpct
Txk1	1.89696e-51	0.509975	0.561	0.288	3.77515e-47	7	Txk
Klrk13	2.15164e-51	0.516617	0.742	0.395	4.28198e-47	7	Klrk1
1700025G04Rik	1.74763e-50	0.483524	0.328	0.064	3.47796e-46	7	1700025G04Rik
Gimap41	3.15932e-50	0.481687	0.921	0.76	6.28736e-46	7	Gimap4
Trgv2	6.8741e-49	0.440064	0.259	0.025	1.36801e-44	7	Trgv2
Prkd3	7.70006e-46	0.47359	0.353	0.1	1.53239e-41	7	Prkd3
Cotl1	1.43652e-45	0.407313	0.917	0.819	2.85882e-41	7	Cotl1
Rnf130	3.99362e-44	0.405625	0.353	0.109	7.9477e-40	7	Rnf130
Fgl21	7.06778e-44	0.726629	0.578	0.336	1.40656e-39	7	Fgl2
Pde3b1	1.38291e-43	0.488699	0.456	0.202	2.75213e-39	7	Pde3b
Emid1	1.64792e-42	0.368011	0.24	0.022	3.27952e-38	7	Emid1
Ccl51	5.91054e-41	0.535978	0.735	0.457	1.17626e-36	7	Ccl5
Tcf72	6.26985e-41	0.425765	0.553	0.22	1.24776e-36	7	Tcf7
Gimap31	1.75129e-38	0.425659	0.93	0.82	3.48525e-34	7	Gimap3
Hcst1	3.05756e-38	0.366214	0.942	0.827	6.08485e-34	7	Hcst
St3gal61	3.77634e-38	0.428011	0.334	0.096	7.51529e-34	7	St3gal6
Slamf71	1.19824e-36	0.35137	0.317	0.107	2.38462e-32	7	Slamf7
mt-Nd41	3.73164e-36	0.315373	0.983	0.957	7.42633e-32	7	mt-Nd4
Tcrg-C1	6.87073e-34	0.388105	0.179	0.014	1.36734e-29	7	Tcrg-C1
Runx32	1.14653e-33	0.426813	0.712	0.518	2.28171e-29	7	Runx3
Ada	1.66762e-33	0.328931	0.281	0.1	3.31873e-29	7	Ada
Cd2441	1.68914e-33	0.366262	0.249	0.057	3.36156e-29	7	Cd244
Ramp11	2.25818e-33	0.401436	0.649	0.39	4.49399e-29	7	Ramp1
Ifi2081	1.5477e-32	0.288101	0.294	0.115	3.08008e-28	7	Ifi208
Skap1	2.82655e-29	0.331253	0.904	0.794	5.62512e-25	7	Skap1
Pabpc1	5.34873e-29	0.266357	0.959	0.893	1.06445e-24	7	Pabpc1
Ms4a4b2	1.27845e-28	0.287249	0.97	0.824	2.54424e-24	7	Ms4a4b
Prkacb	2.05313e-27	0.381233	0.49	0.285	4.08594e-23	7	Prkacb
Itga11	2.64127e-27	0.412943	0.301	0.107	5.25639e-23	7	Itga1
Ighm1	8.45896e-27	0.313204	0.406	0.178	1.68342e-22	7	Ighm
Psmb101	1.43656e-26	0.336772	0.719	0.575	2.85891e-22	7	Psmb10
Gm284381	1.92296e-26	0.371696	0.769	0.597	3.82688e-22	7	Gm28438
Sema4a2	3.07835e-26	0.327299	0.406	0.22	6.12623e-22	7	Sema4a
Cxcr32	5.62024e-26	0.273658	0.513	0.292	1.11848e-21	7	Cxcr3
Jaml3	6.03949e-26	0.361732	0.522	0.331	1.20192e-21	7	Jaml
mt-Nd51	8.27336e-26	0.331679	0.886	0.757	1.64648e-21	7	mt-Nd5
Zyx3	2.17605e-24	0.334882	0.63	0.447	4.33055e-20	7	Zyx
Gm268252	3.43581e-24	0.452523	0.729	0.546	6.83761e-20	7	Gm26825
Adgrg5	3.73213e-24	0.275658	0.234	0.081	7.4273e-20	7	Adgrg5
Neurl31	5.50941e-24	0.336265	0.593	0.375	1.09643e-19	7	Neurl3
Dapk21	1.99727e-23	0.301456	0.262	0.1	3.97478e-19	7	Dapk2
Tm6sf11	3.13952e-23	0.306626	0.365	0.18	6.24796e-19	7	Tm6sf1
Zfp652	5.25921e-23	0.342761	0.339	0.148	1.04664e-18	7	Zfp652
Car2	6.87643e-23	0.350796	0.178	0.057	1.36848e-18	7	Car2
Cd2261	1.10138e-22	0.326423	0.476	0.284	2.19186e-18	7	Cd226
Mylip	1.1417e-22	0.282032	0.23	0.074	2.2721e-18	7	Mylip
Kcnj8	1.39921e-22	0.292024	0.13	0.01	2.78457e-18	7	Kcnj8
Fam189b1	4.97999e-22	0.353097	0.503	0.298	9.91068e-18	7	Fam189b
Ifitm101	7.38039e-22	0.408894	0.287	0.108	1.46877e-17	7	Ifitm10
Dtnbp1	9.07879e-22	0.287824	0.351	0.196	1.80677e-17	7	Dtnbp1
Igha	1.02066e-21	0.269386	0.106	0.005	2.03122e-17	7	Igha
Id3	3.03382e-20	0.593386	0.211	0.056	6.0376e-16	7	Id3
Pde7a1	1.41229e-19	0.33576	0.393	0.221	2.81059e-15	7	Pde7a
Clec2i1	2.81841e-19	0.296579	0.25	0.087	5.60891e-15	7	Clec2i
Eomes	3.93552e-19	0.298068	0.212	0.073	7.83209e-15	7	Eomes
Nme12	1.32652e-18	0.308054	0.745	0.623	2.63991e-14	7	Nme1
Commd8	1.37511e-18	0.268529	0.483	0.337	2.73661e-14	7	Commd8
S100a1	3.02573e-18	0.286498	0.219	0.087	6.02151e-14	7	S100a1
Lrmp	6.10827e-18	0.301074	0.436	0.286	1.21561e-13	7	Lrmp
AB124611	6.95918e-18	0.268156	0.327	0.158	1.38495e-13	7	AB124611
Spry21	8.85807e-18	0.40484	0.245	0.092	1.76284e-13	7	Spry2
Klhdc2	1.41533e-17	0.335893	0.329	0.186	2.81666e-13	7	Klhdc2
Ctla2a2	1.67489e-17	0.277061	0.822	0.622	3.33321e-13	7	Ctla2a
Myc	2.05347e-17	0.36331	0.269	0.146	4.08661e-13	7	Myc
Lpar6	1.97814e-16	0.269268	0.227	0.087	3.9367e-12	7	Lpar6
Lyst	3.27783e-16	0.530881	0.344	0.191	6.52321e-12	7	Lyst
Ugcg1	4.13615e-16	0.305183	0.552	0.38	8.23135e-12	7	Ugcg
Vars	2.34403e-15	0.25315	0.348	0.213	4.66486e-11	7	Vars
Rgs3	5.46299e-15	0.280028	0.422	0.271	1.08719e-10	7	Rgs3
Ipcef1	7.32568e-15	0.270091	0.323	0.188	1.45788e-10	7	Ipcef1
Zfp36l22	1.40563e-14	0.340511	0.795	0.639	2.79735e-10	7	Zfp36l2
Ifi471	1.61654e-14	0.253604	0.662	0.534	3.21707e-10	7	Ifi47
Gimap81	2.20592e-14	0.259304	0.579	0.429	4.39001e-10	7	Gimap8
Tle4	2.35901e-14	0.305421	0.41	0.249	4.69467e-10	7	Tle4
Il2rb1	2.55712e-14	0.262958	0.653	0.516	5.08892e-10	7	Il2rb
Gm47591	1.07406e-13	0.274706	0.587	0.432	2.13748e-09	7	Gm4759
Arl4c2	1.08826e-13	0.27827	0.567	0.418	2.16576e-09	7	Arl4c
Kctd12	1.2248e-13	0.276618	0.219	0.087	2.43748e-09	7	Kctd12
Prex1	4.25759e-13	0.250804	0.322	0.185	8.47302e-09	7	Prex1
Atp8b41	4.35099e-13	0.261549	0.282	0.16	8.6589e-09	7	Atp8b4
Gm8696	9.61737e-13	0.345846	0.188	0.081	1.91395e-08	7	Gm8696
Pitpnc1	1.97719e-12	0.276883	0.474	0.32	3.9348e-08	7	Pitpnc1
Anxa1	7.23113e-12	0.311296	0.219	0.121	1.43907e-07	7	Anxa1
Gem2	5.94008e-11	0.280001	0.462	0.333	1.18213e-06	7	Gem
Cd9	8.14668e-11	0.273094	0.369	0.219	1.62127e-06	7	Cd9
Kbtbd111	1.71123e-10	0.261318	0.33	0.189	3.40551e-06	7	Kbtbd11
Arl4d1	2.64477e-10	0.366111	0.166	0.071	5.26336e-06	7	Arl4d
A630072M18Rik	1.4323e-08	0.259031	0.198	0.109	0.000285043	7	A630072M18Rik
Itga42	7.33148e-08	0.25513	0.372	0.237	0.00145904	7	Itga4
2020-06-01	3.3299e-05	0.302652	0.695	0.637	0.662684	7	Jun
Btg23	0.000100286	0.263862	0.785	0.727	1	7	Btg2
Gzmc1	0.000498771	0.447158	0.137	0.103	1	7	Gzmc
Birc51	1.20948e-299	1.57044	0.949	0.065	2.40699e-295	8	Birc5
Pclaf1	6.51579e-294	1.88917	0.957	0.112	1.29671e-289	8	Pclaf
Stmn11	1.0544e-293	1.87008	0.985	0.179	2.09836e-289	8	Stmn1
Cks1b1	2.62786e-290	1.28959	0.944	0.099	5.22971e-286	8	Cks1b
Cdca81	1.24848e-275	1.12407	0.896	0.058	2.4846e-271	8	Cdca8
Mki671	8.57213e-262	1.44214	0.93	0.119	1.70594e-257	8	Mki67
Ccna21	5.88557e-257	1.01643	0.845	0.037	1.17129e-252	8	Ccna2
Spc241	1.31761e-254	1.01543	0.876	0.065	2.62217e-250	8	Spc24
Hmgb21	8.76151e-253	1.46628	0.999	0.771	1.74363e-248	8	Hmgb2
Ccnb21	9.01003e-248	1.12387	0.825	0.046	1.79309e-243	8	Ccnb2
Cdk11	5.18117e-241	1.0587	0.824	0.068	1.03111e-236	8	Cdk1
Tuba1b1	1.54898e-240	1.67623	0.96	0.4	3.08263e-236	8	Tuba1b
Top2a1	6.4722e-240	1.53737	0.88	0.138	1.28803e-235	8	Top2a
Tpx21	1.60455e-239	0.930956	0.819	0.042	3.19321e-235	8	Tpx2
Smc21	2.0813e-238	1.21745	0.901	0.172	4.142e-234	8	Smc2
Ube2c1	2.08885e-236	1.65907	0.821	0.071	4.15701e-232	8	Ube2c
Tubb51	1.97931e-232	1.61714	0.989	0.706	3.93903e-228	8	Tubb5
Knl11	1.73473e-227	0.775457	0.777	0.033	3.45229e-223	8	Knl1
[truncated: 1,129 more rows]

## Sheet: Cluster_markers_CD8_T_cells
	p_val	avg_logFC	pct.1	pct.2	p_val_adj	cluster	gene
Gpm6b	3.2634e-110	0.869469	0.643	0.192	6.4945e-106	0	Gpm6b
Sdf4	1.18223e-96	0.708642	0.95	0.853	2.35276e-92	0	Sdf4
Tpt1	2.6677e-90	0.295756	0.999	1	5.30898e-86	0	Tpt1
Rpl34	7.09462e-81	0.318661	0.998	0.999	1.4119e-76	0	Rpl34
Ptms	6.70335e-73	0.602282	0.912	0.731	1.33403e-68	0	Ptms
Igfbp7	8.66499e-71	0.787728	0.475	0.133	1.72442e-66	0	Igfbp7
Lag3	7.65332e-69	0.563171	0.933	0.721	1.52309e-64	0	Lag3
Bdh2	3.88274e-59	0.727887	0.376	0.075	7.72704e-55	0	Bdh2
Pou2f2	1.77647e-54	0.64112	0.549	0.226	3.53536e-50	0	Pou2f2
Sat1	5.12955e-53	0.607584	0.844	0.674	1.02083e-48	0	Sat1
Il18r1	5.76475e-48	0.520286	0.811	0.608	1.14724e-43	0	Il18r1
Cst7	8.05507e-46	0.487752	0.9	0.775	1.60304e-41	0	Cst7
Ms4a4c	8.99251e-45	0.554449	0.537	0.244	1.7896e-40	0	Ms4a4c
Slc17a6	1.47242e-43	0.668656	0.571	0.29	2.93027e-39	0	Slc17a6
Bach2	2.2092e-43	0.434318	0.38	0.124	4.39652e-39	0	Bach2
Il18rap	3.13377e-43	0.508132	0.7	0.494	6.23652e-39	0	Il18rap
Ccnd2	5.82972e-42	0.468194	0.841	0.694	1.16017e-37	0	Ccnd2
A530083M17Rik	1.51406e-40	0.337606	0.224	0.046	3.01313e-36	0	A530083M17Rik
Nrgn	1.00701e-39	0.581921	0.739	0.505	2.00405e-35	0	Nrgn
Cd200	1.53594e-39	0.58768	0.581	0.331	3.05667e-35	0	Cd200
Cd53	6.59141e-39	0.364881	0.946	0.918	1.31176e-34	0	Cd53
Hif1a	8.22973e-39	0.420569	0.892	0.771	1.6378e-34	0	Hif1a
Zfp36l1	5.49885e-37	0.431027	0.777	0.607	1.09433e-32	0	Zfp36l1
Ccr7	2.49758e-36	0.805328	0.431	0.166	4.97044e-32	0	Ccr7
Tnfrsf4	9.31966e-35	0.396752	0.596	0.378	1.85471e-30	0	Tnfrsf4
Fkbp1a	8.03467e-34	0.355352	0.913	0.829	1.59898e-29	0	Fkbp1a
Inpp4b	4.22418e-33	0.448174	0.806	0.68	8.40654e-29	0	Inpp4b
Msi2	4.97349e-33	0.457391	0.656	0.458	9.89774e-29	0	Msi2
Nt5e	8.35379e-32	0.415258	0.343	0.133	1.66249e-27	0	Nt5e
Klrk1	3.188e-31	0.333881	0.931	0.839	6.34445e-27	0	Klrk1
Nfat5	4.15318e-31	0.425729	0.525	0.326	8.26525e-27	0	Nfat5
Timp2	1.31076e-30	0.324034	0.264	0.072	2.60854e-26	0	Timp2
Creb3l2	5.67358e-30	0.36107	0.284	0.095	1.1291e-25	0	Creb3l2
Scg5	5.7969e-30	0.307817	0.306	0.107	1.15364e-25	0	Scg5
Fam162a	1.75259e-28	0.421642	0.754	0.606	3.48783e-24	0	Fam162a
Ltb	5.38412e-28	0.28219	0.954	0.926	1.07149e-23	0	Ltb
Arl4d	2.70322e-27	0.38614	0.318	0.114	5.37969e-23	0	Arl4d
Il7r	4.89089e-27	0.382109	0.656	0.478	9.73335e-23	0	Il7r
Klrd1	4.05194e-26	0.317353	0.957	0.891	8.06376e-22	0	Klrd1
Stat3	1.13074e-25	0.388201	0.82	0.714	2.25029e-21	0	Stat3
Ptprs	2.82736e-25	0.334331	0.372	0.202	5.62673e-21	0	Ptprs
Wipf1	2.94421e-24	0.336612	0.753	0.648	5.85927e-20	0	Wipf1
Paip2	2.11763e-23	0.275604	0.87	0.808	4.21429e-19	0	Paip2
Gdi2	3.65674e-23	0.301294	0.88	0.83	7.27728e-19	0	Gdi2
Wisp1	6.0125e-23	0.311915	0.298	0.155	1.19655e-18	0	Wisp1
Plscr1	8.06163e-23	0.376734	0.543	0.375	1.60435e-18	0	Plscr1
Anxa5	1.77094e-22	0.383234	0.694	0.565	3.52434e-18	0	Anxa5
Phf20l1	1.05314e-20	0.379068	0.68	0.552	2.09586e-16	0	Phf20l1
Max	1.4108e-20	0.28584	0.638	0.524	2.80763e-16	0	Max
Itm2c	2.41176e-20	0.316249	0.681	0.565	4.79963e-16	0	Itm2c
Pura	2.63013e-20	0.323749	0.699	0.596	5.23422e-16	0	Pura
Xdh	3.41507e-20	0.280508	0.317	0.158	6.79634e-16	0	Xdh
Tnfrsf18	6.96144e-20	0.26622	0.826	0.741	1.3854e-15	0	Tnfrsf18
Arap2	1.17216e-19	0.346717	0.481	0.322	2.33272e-15	0	Arap2
Serpina3g	4.11641e-19	0.569261	0.404	0.21	8.19207e-15	0	Serpina3g
Anp32a	1.44237e-18	0.267744	0.854	0.792	2.87046e-14	0	Anp32a
Prelid2	1.92784e-18	0.315439	0.583	0.445	3.83659e-14	0	Prelid2
Spry1	3.74032e-18	0.386569	0.375	0.203	7.4436e-14	0	Spry1
Cd160	7.00958e-18	0.392381	0.589	0.426	1.39498e-13	0	Cd160
Cd82	1.74341e-17	0.252783	0.714	0.623	3.46956e-13	0	Cd82
Fam53b	8.84443e-17	0.271586	0.435	0.251	1.76013e-12	0	Fam53b
Tmem71	9.97468e-17	0.301697	0.515	0.362	1.98506e-12	0	Tmem71
Ptpn1	1.166e-16	0.27102	0.706	0.636	2.32045e-12	0	Ptpn1
Pik3r1	1.35387e-16	0.331061	0.581	0.447	2.69433e-12	0	Pik3r1
Alcam	3.50904e-16	0.341009	0.522	0.372	6.98334e-12	0	Alcam
AC149090.1	5.15215e-16	0.271207	0.77	0.697	1.02533e-11	0	AC149090.1
Acot9	2.83397e-15	0.285348	0.535	0.418	5.63988e-11	0	Acot9
Fcho2	1.36042e-14	0.255414	0.358	0.229	2.70736e-10	0	Fcho2
Sesn3	1.72211e-13	0.302141	0.474	0.333	3.42718e-09	0	Sesn3
Gm17745	4.47873e-13	0.280154	0.387	0.258	8.91312e-09	0	Gm17745
Glud1	1.39742e-11	0.274512	0.657	0.606	2.781e-07	0	Glud1
Dusp4	2.635e-11	0.261292	0.637	0.545	5.24391e-07	0	Dusp4
Kmt2a	3.82512e-11	0.284894	0.635	0.54	7.61238e-07	0	Kmt2a
Cd9	5.15341e-11	0.264493	0.367	0.224	1.02558e-06	0	Cd9
Mdfic	1.1624e-10	0.285811	0.609	0.506	2.3133e-06	0	Mdfic
Nrn1	5.1718e-10	0.394518	0.351	0.241	1.02924e-05	0	Nrn1
Ap3b1	1.50695e-09	0.346152	0.496	0.397	2.99898e-05	0	Ap3b1
Cx3cr1	4.22116e-09	0.522615	0.324	0.221	8.40053e-05	0	Cx3cr1
Dapl1	4.31417e-09	0.451972	0.145	0.055	8.58563e-05	0	Dapl1
Kif15	5.36139e-08	0.270922	0.365	0.256	0.00106697	0	Kif15
Klre1	1.77015e-06	0.26108	0.553	0.466	0.0352277	0	Klre1
Serpinb9b	2.25653e-05	0.305606	0.162	0.099	0.449071	0	Serpinb9b
Atf3	2.90986e-05	0.30788	0.244	0.167	0.579091	0	Atf3
Gm156	3.13542e-05	0.326976	0.162	0.087	0.62398	0	Gm156
Slc5a3	3.59603e-05	0.276134	0.349	0.262	0.715646	0	Slc5a3
Gzme	0.000110633	0.309347	0.212	0.143	1	0	Gzme
Cst3	0.000236993	0.294587	0.788	0.752	1	0	Cst3
Gzmd	0.000238233	0.275925	0.232	0.181	1	0	Gzmd
Dbi	0.000669916	0.310778	0.732	0.689	1	0	Dbi
Malat1	3.0761e-106	0.655709	1	0.999	6.12174e-102	1	Malat1
Ccl5	5.12898e-104	1.59501	0.862	0.591	1.02072e-99	1	Ccl5
Ly6c2	1.58905e-99	1.20348	0.754	0.398	3.16237e-95	1	Ly6c2
Klf2	9.3339e-98	1.66013	0.625	0.25	1.85754e-93	1	Klf2
Cxcr3	2.53275e-97	0.975407	0.56	0.145	5.04042e-93	1	Cxcr3
Ms4a6b	6.02611e-93	0.577004	0.967	0.966	1.19926e-88	1	Ms4a6b
Ly6c1	1.10371e-81	1.08347	0.654	0.319	2.19649e-77	1	Ly6c1
Rps27	2.48045e-79	0.342126	0.998	1	4.93635e-75	1	Rps27
Itgb7	3.38771e-74	0.836606	0.544	0.22	6.74187e-70	1	Itgb7
Gimap3	1.88953e-72	0.68426	0.869	0.841	3.76036e-68	1	Gimap3
Gramd3	5.89945e-71	0.894804	0.639	0.369	1.17405e-66	1	Gramd3
Ccr2	3.2123e-70	1.11605	0.514	0.173	6.3928e-66	1	Ccr2
Ifngr1	2.20895e-66	0.700119	0.846	0.79	4.39603e-62	1	Ifngr1
Zfp36l2	1.67848e-60	0.864212	0.794	0.704	3.34034e-56	1	Zfp36l2
Hcst	3.83904e-54	0.523208	0.935	0.949	7.64006e-50	1	Hcst
Ms4a4b	1.43359e-53	0.436026	0.991	0.982	2.85299e-49	1	Ms4a4b
S1pr1	4.96696e-52	0.614624	0.251	0.031	9.88474e-48	1	S1pr1
Ifi203	2.75058e-50	0.544122	0.773	0.689	5.47392e-46	1	Ifi203
Emb	4.25664e-50	0.752076	0.549	0.282	8.47114e-46	1	Emb
Mndal	8.43828e-47	0.525701	0.742	0.678	1.6793e-42	1	Mndal
Arl4c	8.48948e-47	0.774661	0.565	0.36	1.68949e-42	1	Arl4c
Gimap6	1.82826e-45	0.643546	0.756	0.694	3.63841e-41	1	Gimap6
Gm8995	2.50367e-41	0.558975	0.837	0.833	4.98256e-37	1	Gm8995
mt-Rnr2	1.32427e-40	0.313513	0.999	1	2.63544e-36	1	mt-Rnr2
Ubb	2.38196e-40	0.42075	0.994	0.997	4.74034e-36	1	Ubb
Arhgdib	8.42939e-40	0.382696	0.953	0.955	1.67753e-35	1	Arhgdib
Ptpn18	1.19839e-36	0.308968	0.942	0.97	2.38491e-32	1	Ptpn18
Rtp4	1.73124e-36	0.556539	0.384	0.142	3.44533e-32	1	Rtp4
Emp3	2.07696e-36	0.643238	0.71	0.633	4.13335e-32	1	Emp3
Cd2	2.39476e-36	0.446022	0.846	0.806	4.76581e-32	1	Cd2
Tcf7	4.35615e-36	0.598803	0.314	0.094	8.66917e-32	1	Tcf7
Gimap4	1.56882e-35	0.486739	0.824	0.85	3.12212e-31	1	Gimap4
Klf6	1.05626e-34	0.771836	0.754	0.757	2.10207e-30	1	Klf6
Slamf7	2.08705e-32	0.501339	0.351	0.187	4.15344e-28	1	Slamf7
Sp100	5.28054e-32	0.440905	0.76	0.771	1.05088e-27	1	Sp100
Cyba	5.41858e-32	0.368033	0.887	0.907	1.07835e-27	1	Cyba
Samhd1	7.50784e-32	0.530013	0.571	0.446	1.49414e-27	1	Samhd1
Btg1	1.05594e-29	0.38774	0.974	0.984	2.10143e-25	1	Btg1
Klf3	1.5248e-29	0.50601	0.192	0.035	3.0345e-25	1	Klf3
S100a10	1.73955e-29	0.386831	0.964	0.978	3.46187e-25	1	S100a10
Stk17b	4.91782e-29	0.453488	0.864	0.911	9.78695e-25	1	Stk17b
Cxcr4	1.08041e-28	0.523795	0.201	0.058	2.15013e-24	1	Cxcr4
Fyb	1.0051e-26	0.412376	0.803	0.833	2.00025e-22	1	Fyb
Gzmk	1.70643e-26	0.653747	0.325	0.154	3.39597e-22	1	Gzmk
Slfn2	9.14271e-25	0.462593	0.762	0.732	1.81949e-20	1	Slfn2
mt-Rnr1	1.04736e-24	0.292307	0.976	0.99	2.08434e-20	1	mt-Rnr1
Txnip	4.6722e-24	0.489155	0.59	0.539	9.29815e-20	1	Txnip
Rasgrp2	6.63849e-24	0.509435	0.225	0.066	1.32113e-19	1	Rasgrp2
Bcl11b	1.29634e-23	0.518834	0.575	0.516	2.57984e-19	1	Bcl11b
Chd3	1.64369e-22	0.524855	0.442	0.324	3.27111e-18	1	Chd3
Gimap7	2.79594e-22	0.526036	0.654	0.649	5.5642e-18	1	Gimap7
Gpr183	6.42227e-22	0.642359	0.615	0.549	1.2781e-17	1	Gpr183
St3gal6	3.20118e-21	0.406317	0.267	0.142	6.37068e-17	1	St3gal6
Zbp1	8.68992e-21	0.477189	0.583	0.548	1.72938e-16	1	Zbp1
Rnf138	1.08382e-20	0.565695	0.536	0.502	2.15691e-16	1	Rnf138
Zdhhc18	3.95123e-20	0.440508	0.671	0.716	7.86335e-16	1	Zdhhc18
C230096K16Rik	7.37495e-20	0.383727	0.147	0.027	1.46769e-15	1	C230096K16Rik
Ifi208	2.58938e-19	0.375649	0.254	0.1	5.15312e-15	1	Ifi208
Npc2	6.1852e-19	0.316243	0.765	0.858	1.23092e-14	1	Npc2
Ripor2	7.46061e-19	0.461224	0.242	0.108	1.48474e-14	1	Ripor2
Slco3a1	1.49469e-18	0.457419	0.275	0.131	2.97458e-14	1	Slco3a1
Ifi27l2a	2.47461e-18	0.469403	0.767	0.717	4.92471e-14	1	Ifi27l2a
Ptprc	4.47613e-18	0.277445	0.918	0.96	8.90795e-14	1	Ptprc
A130071D04Rik	1.02699e-17	0.489734	0.617	0.626	2.04381e-13	1	A130071D04Rik
Gzma	1.15252e-17	0.96163	0.217	0.099	2.29363e-13	1	Gzma
Lime1	1.56478e-17	0.320189	0.823	0.886	3.11407e-13	1	Lime1
Ier5	2.52152e-17	0.514461	0.625	0.621	5.01807e-13	1	Ier5
Scand1	3.03866e-17	0.316033	0.831	0.894	6.04724e-13	1	Scand1
Ubc	6.91758e-17	0.549685	0.697	0.728	1.37667e-12	1	Ubc
Epsti1	1.13207e-16	0.448878	0.646	0.669	2.25293e-12	1	Epsti1
Cd7	1.22756e-16	0.407578	0.195	0.083	2.44296e-12	1	Cd7
Supt4a	1.93701e-16	0.352405	0.751	0.821	3.85484e-12	1	Supt4a
Apbb1ip	2.10743e-16	0.431191	0.457	0.419	4.19399e-12	1	Apbb1ip
Lef1	4.08662e-16	0.365263	0.242	0.136	8.13279e-12	1	Lef1
Slamf6	1.62641e-15	0.409153	0.264	0.129	3.23673e-11	1	Slamf6
Tpst2	2.74856e-15	0.438866	0.433	0.364	5.46991e-11	1	Tpst2
Hspa1b	3.58246e-15	0.750115	0.689	0.64	7.12945e-11	1	Hspa1b
Skap1	5.21842e-15	0.251206	0.814	0.894	1.03852e-10	1	Skap1
Cd37	1.33259e-14	0.313054	0.675	0.747	2.65198e-10	1	Cd37
Igtp	1.33868e-14	0.487357	0.546	0.494	2.66411e-10	1	Igtp
Pim1	2.08003e-14	0.570644	0.546	0.477	4.13947e-10	1	Pim1
Ctsw	2.26307e-14	0.284668	0.833	0.846	4.50374e-10	1	Ctsw
Ifi214	5.63914e-14	0.321372	0.307	0.172	1.12224e-09	1	Ifi214
Selplg	1.19554e-13	0.320586	0.834	0.89	2.37925e-09	1	Selplg
Rasa3	1.45461e-13	0.392789	0.222	0.104	2.89483e-09	1	Rasa3
Hspa1a	1.88424e-13	0.85905	0.675	0.629	3.74983e-09	1	Hspa1a
Cmah	2.8615e-13	0.274438	0.122	0.036	5.69467e-09	1	Cmah
Fam189b	5.11969e-13	0.42648	0.413	0.323	1.01887e-08	1	Fam189b
Mcl1	6.15902e-13	0.368312	0.779	0.858	1.22571e-08	1	Mcl1
Arhgap45	1.00679e-12	0.369748	0.709	0.759	2.00362e-08	1	Arhgap45
Btg2	1.17363e-12	0.321421	0.811	0.881	2.33565e-08	1	Btg2
Saraf	1.35229e-12	0.366694	0.61	0.671	2.69119e-08	1	Saraf
S1pr4	1.68113e-12	0.418237	0.345	0.289	3.34562e-08	1	S1pr4
Bst2	1.68486e-12	0.348112	0.541	0.537	3.35304e-08	1	Bst2
Ablim1	2.56987e-12	0.289256	0.683	0.77	5.1143e-08	1	Ablim1
Tsc22d3	2.9576e-12	0.491248	0.361	0.29	5.88593e-08	1	Tsc22d3
Gmfg	3.36924e-12	0.263238	0.852	0.905	6.70513e-08	1	Gmfg
Gm12250	4.57851e-12	0.362563	0.302	0.203	9.11169e-08	1	Gm12250
Ccr5	4.79105e-12	0.533074	0.484	0.408	9.53467e-08	1	Ccr5
Dnaja1	5.8371e-12	0.526229	0.748	0.825	1.16164e-07	1	Dnaja1
Slfn1	6.98298e-12	0.348008	0.417	0.31	1.38968e-07	1	Slfn1
Gm45153	1.15422e-11	0.297216	0.131	0.061	2.29702e-07	1	Gm45153
Grap	1.18344e-11	0.417454	0.519	0.518	2.35516e-07	1	Grap
Pnrc1	1.45354e-11	0.359908	0.767	0.846	2.89268e-07	1	Pnrc1
Irf7	1.72989e-11	0.328741	0.259	0.176	3.44265e-07	1	Irf7
Ifi47	1.83342e-11	0.428336	0.586	0.611	3.64869e-07	1	Ifi47
Tbc1d10c	2.16415e-11	0.371672	0.585	0.622	4.30687e-07	1	Tbc1d10c
Acp5	2.56493e-11	0.352056	0.304	0.23	5.10447e-07	1	Acp5
Samd9l	3.22076e-11	0.371982	0.379	0.319	6.40963e-07	1	Samd9l
Lat	5.93786e-11	0.275436	0.738	0.827	1.18169e-06	1	Lat
2020-09-01	1.24019e-10	0.260463	0.775	0.867	2.4681e-06	1	2020-09-01
Ifi209	1.2898e-10	0.306202	0.378	0.281	2.56683e-06	1	Ifi209
Itga4	1.3691e-10	0.574988	0.325	0.257	2.72464e-06	1	Itga4
Sgk1	1.63814e-10	0.552757	0.3	0.217	3.26005e-06	1	Sgk1
Esm1	1.84491e-10	0.279838	0.102	0.025	3.67156e-06	1	Esm1
Arl5c	3.47139e-10	0.2948	0.145	0.058	6.90841e-06	1	Arl5c
Ltb1	3.56764e-10	0.275924	0.904	0.937	7.09995e-06	1	Ltb
Xrn2	6.36026e-10	0.28518	0.591	0.685	1.26576e-05	1	Xrn2
Gna13	6.40168e-10	0.480904	0.555	0.575	1.274e-05	1	Gna13
Atp10d	6.54157e-10	0.308952	0.169	0.072	1.30184e-05	1	Atp10d
Dnajb1	9.27108e-10	0.79336	0.563	0.566	1.84504e-05	1	Dnajb1
Gm4759	1.2145e-09	0.459105	0.489	0.455	2.41698e-05	1	Gm4759
Ppp1r12a	1.86148e-09	0.358534	0.471	0.51	3.70453e-05	1	Ppp1r12a
Abcb1a	2.33821e-09	0.313251	0.192	0.114	4.65327e-05	1	Abcb1a
1700025G04Rik	3.02971e-09	0.279074	0.161	0.086	6.02942e-05	1	1700025G04Rik
Gm26825	4.11149e-09	0.586785	0.599	0.588	8.18227e-05	1	Gm26825
Ankrd11	4.28928e-09	0.383871	0.678	0.735	8.53609e-05	1	Ankrd11
Gpr18	6.33148e-09	0.34851	0.276	0.19	0.000126003	1	Gpr18
Smad7	9.6795e-09	0.393472	0.558	0.598	0.000192632	1	Smad7
Pdcd4	1.13569e-08	0.335629	0.587	0.62	0.000226014	1	Pdcd4
Zcchc11	1.53569e-08	0.367691	0.517	0.554	0.000305617	1	Zcchc11
Irf1	1.66401e-08	0.429235	0.453	0.434	0.000331154	1	Irf1
Ly6a	2.58983e-08	0.393591	0.507	0.455	0.000515402	1	Ly6a
Arl6ip5	2.9048e-08	0.264202	0.69	0.796	0.000578084	1	Arl6ip5
Lilr4b	3.51492e-08	0.296503	0.156	0.1	0.000699505	1	Lilr4b
Cd69	3.98724e-08	0.556689	0.411	0.38	0.000793501	1	Cd69
Cd48	5.70543e-08	0.307124	0.645	0.737	0.00113544	1	Cd48
Ssh2	5.94027e-08	0.317306	0.252	0.174	0.00118217	1	Ssh2
Mbp	8.04711e-08	0.37074	0.286	0.207	0.00160145	1	Mbp
Ahnak	1.04803e-07	0.417581	0.675	0.755	0.00208568	1	Ahnak
Trp53inp1	1.30882e-07	0.302923	0.226	0.169	0.00260469	1	Trp53inp1
Gimap9	1.32805e-07	0.461932	0.489	0.481	0.00264296	1	Gimap9
AB124611	1.75764e-07	0.298281	0.271	0.209	0.00349789	1	AB124611
Park7	2.06375e-07	0.272285	0.631	0.715	0.00410707	1	Park7
Nsd3	4.92036e-07	0.318095	0.616	0.704	0.00979202	1	Nsd3
Gm37728	5.41709e-07	0.251435	0.14	0.084	0.0107806	1	Gm37728
Pja1	1.1917e-06	0.337686	0.209	0.177	0.023716	1	Pja1
Ier2	1.19498e-06	0.443635	0.58	0.666	0.0237812	1	Ier2
Dgka	1.48918e-06	0.311467	0.343	0.338	0.0296362	1	Dgka
Rab8a	2.26845e-06	0.275183	0.568	0.642	0.0451444	1	Rab8a
CAAA01194877.1	2.58622e-06	0.285146	0.218	0.171	0.0514683	1	CAAA01194877.1
Xaf1	5.59861e-06	0.279577	0.321	0.301	0.111418	1	Xaf1
Adgre5	6.18911e-06	0.335935	0.45	0.485	0.123169	1	Adgre5
Itgb1	7.43324e-06	0.359663	0.642	0.732	0.147929	1	Itgb1
H2-Q4	7.73396e-06	0.254289	0.66	0.767	0.153914	1	H2-Q4
Rabac1	1.01573e-05	0.272257	0.659	0.773	0.202141	1	Rabac1
Clec2d	1.50265e-05	0.315097	0.611	0.667	0.299041	1	Clec2d
Neat1	1.76509e-05	0.352458	0.523	0.582	0.35127	1	Neat1
Elf1	1.83377e-05	0.251343	0.569	0.679	0.364939	1	Elf1
Tle4	1.89192e-05	0.297107	0.302	0.3	0.376511	1	Tle4
Hsp90aa1	2.14059e-05	0.53521	0.835	0.903	0.426	1	Hsp90aa1
Tob1	3.30346e-05	0.286365	0.2	0.15	0.657422	1	Tob1
Rnf125	3.75234e-05	0.361308	0.344	0.335	0.746754	1	Rnf125
Hopx	4.10597e-05	0.392366	0.569	0.603	0.81713	1	Hopx
Sit1	5.15555e-05	0.272124	0.217	0.169	1	1	Sit1
Smpdl3a	5.55019e-05	0.315683	0.385	0.384	1	1	Smpdl3a
Bin2	6.07434e-05	0.314875	0.524	0.611	1	1	Bin2
Klhl6	6.76834e-05	0.338351	0.324	0.316	1	1	Klhl6
St8sia4	7.07805e-05	0.342031	0.265	0.23	1	1	St8sia4
Cd84	8.64964e-05	0.332012	0.457	0.476	1	1	Cd84
Gimap8	0.000143741	0.342024	0.43	0.447	1	1	Gimap8
Rora	0.000159441	0.38837	0.4	0.363	1	1	Rora
Hipk1	0.0001619	0.297318	0.37	0.41	1	1	Hipk1
Jun	0.000230328	0.493387	0.587	0.673	1	1	Jun
Zfp36	0.000296604	0.478082	0.322	0.294	1	1	Zfp36
Gbp2	0.00035987	0.274277	0.286	0.223	1	1	Gbp2
Grap2	0.00038933	0.26116	0.235	0.205	1	1	Grap2
Irgm1	0.000422003	0.296533	0.317	0.278	1	1	Irgm1
Gprin3	0.00042792	0.277876	0.229	0.199	1	1	Gprin3
Fos	0.000503857	0.488112	0.306	0.28	1	1	Fos
Gpr132	0.000548502	0.30598	0.3	0.271	1	1	Gpr132
Sntb2	0.000833859	0.273052	0.213	0.17	1	1	Sntb2
7330423F06Rik	0.000923979	0.25279	0.122	0.093	1	1	7330423F06Rik
Foxp1	0.000963059	0.303833	0.359	0.355	1	1	Foxp1
Cited2	0.00100251	0.392593	0.406	0.445	1	1	Cited2
Pde7a	0.00104434	0.363074	0.341	0.334	1	1	Pde7a
Tnfaip8l2	0.00125062	0.308278	0.305	0.283	1	1	Tnfaip8l2
Tecpr1	0.00141382	0.273547	0.29	0.275	1	1	Tecpr1
Znrf2	0.0014233	0.300961	0.413	0.461	1	1	Znrf2
Vps37b	0.00175001	0.299699	0.655	0.773	1	1	Vps37b
Ppp1r15a	0.00186556	0.374287	0.446	0.482	1	1	Ppp1r15a
Gbp4	0.00190194	0.273737	0.561	0.664	1	1	Gbp4
Sp110	0.00216781	0.267575	0.563	0.638	1	1	Sp110
Ccnd3	0.0026987	0.258242	0.46	0.553	1	1	Ccnd3
Klk8	0.00275473	0.294142	0.481	0.557	1	1	Klk8
Sorl1	0.00306847	0.274077	0.329	0.34	1	1	Sorl1
Maf	0.00338978	0.285596	0.142	0.093	1	1	Maf
Commd8	0.0042174	0.292017	0.391	0.415	1	1	Commd8
Cdc42ep3	0.0046999	0.273266	0.253	0.239	1	1	Cdc42ep3
Atp1b3	0.00519017	0.267126	0.533	0.655	1	1	Atp1b3
Klf13	0.00522273	0.272862	0.543	0.622	1	1	Klf13
Gm37033	0.00640368	0.357719	0.395	0.429	1	1	Gm37033
Ctsd	4.69468e-123	0.662615	0.992	0.832	9.34288e-119	2	Ctsd
Lat2	7.93504e-114	0.631523	0.801	0.335	1.57915e-109	2	Lat2
Spp1	1.50814e-102	1.15215	0.946	0.599	3.00135e-98	2	Spp1
Cd3g	1.14559e-96	0.409346	0.999	0.99	2.27985e-92	2	Cd3g
Lgals3	2.46041e-88	0.567265	0.985	0.818	4.89646e-84	2	Lgals3
Sh3bgrl3	3.43021e-88	0.394106	0.997	0.96	6.82646e-84	2	Sh3bgrl3
Abcb9	1.19395e-84	0.502879	0.644	0.263	2.37608e-80	2	Abcb9
Fcer1g	8.56168e-84	1.34453	0.513	0.122	1.70386e-79	2	Fcer1g
Gzmb	7.09582e-82	0.661952	0.943	0.63	1.41214e-77	2	Gzmb
Fgl2	1.12445e-81	0.597788	0.836	0.452	2.23776e-77	2	Fgl2
S100a6	1.59298e-77	0.666823	0.974	0.906	3.17019e-73	2	S100a6
Klra5	1.33122e-74	1.40038	0.451	0.092	2.64925e-70	2	Klra5
Cd52	8.86962e-72	0.400562	1	0.992	1.76514e-67	2	Cd52
Ctla2a	1.84261e-70	0.565387	0.986	0.805	3.66698e-66	2	Ctla2a
AW112010	1.4186e-69	0.381712	1	0.987	2.82316e-65	2	AW112010
Litaf	4.29265e-69	0.503166	0.866	0.536	8.5428e-65	2	Litaf
S100a11	2.04215e-68	0.473079	0.975	0.869	4.06409e-64	2	S100a11
Itga1	4.36582e-65	0.422326	0.523	0.181	8.68841e-61	2	Itga1
Capg	3.73693e-60	0.389649	0.964	0.771	7.43687e-56	2	Capg
Tmsb4x	1.98487e-59	0.256287	1	1	3.95009e-55	2	Tmsb4x
Myl6	6.16253e-59	0.278626	0.999	0.986	1.2264e-54	2	Myl6
Il2rb	1.83682e-58	0.411808	0.902	0.666	3.65546e-54	2	Il2rb
Entpd1	9.31664e-57	0.434632	0.595	0.244	1.85411e-52	2	Entpd1
S100a4	9.22509e-56	0.457836	0.994	0.846	1.83589e-51	2	S100a4
Pdcd1	1.46863e-54	0.385568	0.949	0.756	2.92272e-50	2	Pdcd1
Dapk2	4.13816e-53	0.370593	0.489	0.174	8.23535e-49	2	Dapk2
Vim	5.33251e-52	0.399164	0.996	0.895	1.06122e-47	2	Vim
Ppp1r3b	1.87006e-51	0.343537	0.529	0.24	3.72161e-47	2	Ppp1r3b
Gzmf	9.36019e-51	1.86458	0.538	0.26	1.86277e-46	2	Gzmf
Cd244	1.14475e-49	0.280987	0.321	0.088	2.27817e-45	2	Cd244
Cd8a	1.73642e-45	0.312413	0.998	0.903	3.45566e-41	2	Cd8a
Prdx5	1.06969e-43	0.300699	0.918	0.739	2.12878e-39	2	Prdx5
1700017B05Rik	2.65201e-43	0.290595	0.494	0.234	5.27777e-39	2	1700017B05Rik
Cdk6	2.84878e-41	0.47012	0.725	0.449	5.66936e-37	2	Cdk6
Styk1	7.32897e-40	0.327147	0.439	0.178	1.45854e-35	2	Styk1
Pglyrp1	1.75127e-38	0.368868	0.805	0.537	3.48521e-34	2	Pglyrp1
Tmem163	4.01933e-38	0.272407	0.499	0.245	7.99886e-34	2	Tmem163
Nkg7	4.76747e-38	0.253863	0.999	0.976	9.48773e-34	2	Nkg7
Ugcg	1.44702e-37	0.356957	0.856	0.603	2.87971e-33	2	Ugcg
Isg20	4.82439e-36	0.250145	0.573	0.284	9.60102e-32	2	Isg20
Hopx1	2.25767e-35	0.284445	0.799	0.551	4.493e-31	2	Hopx
Vasp	1.19576e-34	0.276528	0.957	0.823	2.37968e-30	2	Vasp
Matk	2.30464e-34	0.25116	0.338	0.142	4.58647e-30	2	Matk
Ech1	2.4642e-34	0.314017	0.823	0.599	4.90401e-30	2	Ech1
Filip1	3.47258e-34	0.320836	0.301	0.097	6.91078e-30	2	Filip1
Ntan1	2.21746e-33	0.307663	0.767	0.567	4.41298e-29	2	Ntan1
Bcl2	2.78658e-33	0.326084	0.842	0.625	5.54558e-29	2	Bcl2
Chn2	5.23762e-32	0.252553	0.307	0.102	1.04234e-27	2	Chn2
Cxcr6	1.26566e-31	0.262183	0.972	0.838	2.51879e-27	2	Cxcr6
Ier5l	1.65076e-31	0.412367	0.6	0.331	3.28518e-27	2	Ier5l
Smyd3	3.62202e-31	0.251135	0.453	0.238	7.20817e-27	2	Smyd3
Tcrg-C2	6.69962e-31	0.309112	0.237	0.074	1.33329e-26	2	Tcrg-C2
Glrx	7.86145e-31	0.294371	0.739	0.498	1.56451e-26	2	Glrx
Nedd9	1.73402e-30	0.274842	0.642	0.412	3.45087e-26	2	Nedd9
Klrd11	2.97255e-30	0.257989	0.99	0.885	5.91567e-26	2	Klrd1
C1qtnf6	4.0464e-30	0.279016	0.33	0.138	8.05274e-26	2	C1qtnf6
Eva1b	4.18327e-30	0.283664	0.71	0.482	8.32512e-26	2	Eva1b
Ccr51	1.84641e-29	0.267486	0.662	0.369	3.67453e-25	2	Ccr5
Tnfrsf9	1.95463e-29	0.272082	0.934	0.707	3.88991e-25	2	Tnfrsf9
Gpi1	3.47056e-29	0.252183	0.956	0.847	6.90676e-25	2	Gpi1
Klre11	3.9269e-29	0.306249	0.699	0.434	7.81491e-25	2	Klre1
Ifitm1	9.90725e-29	0.764296	0.576	0.383	1.97164e-24	2	Ifitm1
F2r	1.3144e-28	0.258854	0.562	0.331	2.61579e-24	2	F2r
Ptpn6	2.60529e-27	0.317477	0.749	0.53	5.18478e-23	2	Ptpn6
Ramp1	8.62012e-27	0.291665	0.557	0.325	1.71549e-22	2	Ramp1
Gzmc	5.35518e-26	1.21766	0.361	0.143	1.06573e-21	2	Gzmc
Vps37b1	1.60829e-25	0.265584	0.879	0.722	3.20065e-21	2	Vps37b
Tgfbr2	4.70027e-25	0.254419	0.686	0.448	9.354e-21	2	Tgfbr2
Irf8	1.04588e-24	0.300932	0.874	0.638	2.0814e-20	2	Irf8
Rgs2	1.48375e-24	0.388178	0.73	0.533	2.95282e-20	2	Rgs2
AA467197	3.12133e-24	0.308214	0.535	0.289	6.21176e-20	2	AA467197
Ndrg1	8.79347e-23	0.27893	0.439	0.234	1.74999e-18	2	Ndrg1
Ifitm2	2.40112e-20	0.364513	0.708	0.511	4.77846e-16	2	Ifitm2
Hilpda	3.39338e-17	0.293672	0.693	0.501	6.75316e-13	2	Hilpda
Nr4a2	7.61273e-17	0.303484	0.74	0.569	1.51501e-12	2	Nr4a2
Plac8	8.73994e-16	0.28209	0.716	0.522	1.73934e-11	2	Plac8
Mt1	4.29667e-13	0.410345	0.338	0.203	8.5508e-09	2	Mt1
Klra3	1.63673e-11	0.371433	0.13	0.042	3.25726e-07	2	Klra3
Gm1561	7.33989e-10	0.274732	0.169	0.087	1.46071e-05	2	Gm156
Gzma1	0.00711578	0.271408	0.105	0.125	1	2	Gzma
Lag31	5.61206e-108	0.721517	0.96	0.736	1.11686e-103	3	Lag3
Tpt11	3.2444e-89	0.315273	1	1	6.45668e-85	3	Tpt1
Rgs16	3.98515e-89	0.857506	0.927	0.651	7.93085e-85	3	Rgs16
Sdf41	3.03588e-82	0.628811	0.97	0.859	6.04171e-78	3	Sdf4
Tnfrsf91	1.68152e-77	0.673438	0.946	0.722	3.3464e-73	3	Tnfrsf9
Nkg71	3.02731e-71	0.423089	0.993	0.979	6.02464e-67	3	Nkg7
Serpinb6b	6.26541e-71	0.876229	0.805	0.511	1.24688e-66	3	Serpinb6b
Dusp41	9.89427e-67	0.578505	0.782	0.533	1.96906e-62	3	Dusp4
Bhlhe40	3.35661e-64	0.653102	0.901	0.685	6.67998e-60	3	Bhlhe40
Gapdh	1.23912e-61	0.44188	0.999	0.984	2.46598e-57	3	Gapdh
Cd3d	4.84527e-61	0.301708	0.995	0.98	9.64257e-57	3	Cd3d
Bcl2a1b	1.35617e-60	0.441824	0.955	0.799	2.69891e-56	3	Bcl2a1b
Uhrf2	1.4677e-60	0.602319	0.823	0.61	2.92087e-56	3	Uhrf2
Ptms1	2.06261e-60	0.468387	0.931	0.744	4.1048e-56	3	Ptms
Cxcr61	8.91407e-58	0.481975	0.96	0.849	1.77399e-53	3	Cxcr6
Hilpda1	1.08927e-57	0.755495	0.781	0.503	2.16775e-53	3	Hilpda
Sat11	2.91998e-57	0.606971	0.871	0.685	5.81105e-53	3	Sat1
Irf81	4.3904e-57	0.617806	0.879	0.655	8.73734e-53	3	Irf8
Cd531	1.01488e-56	0.394568	0.974	0.917	2.01972e-52	3	Cd53
Cnih2	1.4238e-55	0.579716	0.455	0.149	2.83351e-51	3	Cnih2
Aldoa	3.7334e-55	0.466733	0.989	0.934	7.42984e-51	3	Aldoa
Fxyd5	1.39452e-53	0.276754	0.998	0.99	2.77523e-49	3	Fxyd5
Klrd12	6.72397e-51	0.409335	0.969	0.895	1.33814e-46	3	Klrd1
Srgn	8.66971e-51	0.373975	0.998	0.987	1.72536e-46	3	Srgn
Bcl2a1d	1.13655e-50	0.435313	0.893	0.697	2.26184e-46	3	Bcl2a1d
Ctla4	1.40609e-47	0.627099	0.812	0.573	2.79826e-43	3	Ctla4
Fkbp1a1	3.07431e-46	0.385653	0.94	0.833	6.11819e-42	3	Fkbp1a
Dusp5	4.74457e-46	0.569726	0.763	0.512	9.44216e-42	3	Dusp5
H2-K1	2.33094e-45	0.257119	0.999	0.999	4.63881e-41	3	H2-K1
Orai1	1.13549e-44	0.532422	0.775	0.534	2.25974e-40	3	Orai1
Prf1	1.626e-44	0.678956	0.846	0.675	3.2359e-40	3	Prf1
Tnfaip3	1.60675e-43	0.399957	0.835	0.606	3.19759e-39	3	Tnfaip3
Hif1a1	3.39482e-43	0.393578	0.926	0.777	6.75604e-39	3	Hif1a
Klrc2	1.04439e-41	0.329266	0.896	0.746	2.07845e-37	3	Klrc2
Id2	1.07494e-40	0.451558	0.974	0.904	2.13924e-36	3	Id2
Jund	6.51983e-40	0.331704	0.994	0.972	1.29751e-35	3	Jund
Havcr2	7.21603e-40	0.639599	0.555	0.337	1.43606e-35	3	Havcr2
Samsn1	1.05158e-39	0.419923	0.872	0.689	2.09275e-35	3	Samsn1
Slc37a2	2.28458e-39	0.390074	0.379	0.157	4.54654e-35	3	Slc37a2
Cenpa	3.39081e-39	0.352567	0.759	0.497	6.74804e-35	3	Cenpa
Serpinb9	1.54604e-38	0.531748	0.717	0.486	3.07677e-34	3	Serpinb9
Serpine2	4.89384e-38	0.612773	0.354	0.132	9.73924e-34	3	Serpine2
Stat31	2.48073e-36	0.425985	0.866	0.717	4.9369e-32	3	Stat3
Btg11	4.91646e-36	0.298248	0.995	0.981	9.78425e-32	3	Btg1
Ndfip1	7.22706e-36	0.355241	0.878	0.739	1.43826e-31	3	Ndfip1
Klrc1	1.1199e-35	0.305921	0.976	0.863	2.22871e-31	3	Klrc1
Sdcbp2	1.25585e-34	0.370623	0.435	0.231	2.49926e-30	3	Sdcbp2
Ubl5	1.91949e-34	0.276787	0.984	0.933	3.81998e-30	3	Ubl5
Mxi1	2.7656e-34	0.363167	0.504	0.289	5.50381e-30	3	Mxi1
Icos	5.73856e-34	0.424653	0.869	0.7	1.14203e-29	3	Icos
Ier3	8.85941e-33	0.579289	0.6	0.366	1.76311e-28	3	Ier3
Slc17a61	1.39738e-32	0.538764	0.543	0.317	2.78093e-28	3	Slc17a6
Pgk1	5.79359e-32	0.370153	0.962	0.849	1.15298e-27	3	Pgk1
Ostf1	2.76379e-31	0.323891	0.977	0.932	5.50021e-27	3	Ostf1
Paip21	1.15689e-30	0.263431	0.894	0.81	2.30232e-26	3	Paip2
Slc2a3	2.29273e-29	0.400515	0.533	0.318	4.56277e-25	3	Slc2a3
Crem	2.35785e-29	0.336166	0.711	0.558	4.69236e-25	3	Crem
Dusp2	3.05177e-29	0.354028	0.857	0.735	6.07333e-25	3	Dusp2
Tpi1	7.2352e-29	0.436301	0.892	0.727	1.43988e-24	3	Tpi1
Pkm	7.88395e-29	0.3178	0.972	0.907	1.56898e-24	3	Pkm
Mdfic1	1.11462e-28	0.342176	0.678	0.505	2.21821e-24	3	Mdfic
Stx11	1.47527e-28	0.414411	0.483	0.272	2.93593e-24	3	Stx11
Rbpj	5.61886e-28	0.307762	0.824	0.673	1.11821e-23	3	Rbpj
Vamp8	7.60638e-28	0.285847	0.848	0.746	1.51375e-23	3	Vamp8
Tgfb1	1.5706e-27	0.394723	0.733	0.586	3.12566e-23	3	Tgfb1
Lgals31	2.33124e-27	0.367318	0.96	0.834	4.6394e-23	3	Lgals3
Akap13	2.88357e-27	0.336149	0.878	0.78	5.73859e-23	3	Akap13
Sh2d2a	5.19421e-27	0.335791	0.882	0.773	1.0337e-22	3	Sh2d2a
Zbtb32	1.68851e-26	0.363618	0.533	0.362	3.3603e-22	3	Zbtb32
Tmem171	1.78263e-26	0.390523	0.352	0.162	3.5476e-22	3	Tmem171
Selenok	4.13746e-26	0.251718	0.916	0.841	8.23395e-22	3	Selenok
Anxa2	5.6407e-26	0.323474	0.956	0.849	1.12255e-21	3	Anxa2
Pdcd11	1.14129e-24	0.279466	0.922	0.773	2.27128e-20	3	Pdcd1
Crlf2	2.78713e-24	0.360728	0.767	0.596	5.54667e-20	3	Crlf2
Cd27	1.24443e-23	0.300247	0.731	0.602	2.47655e-19	3	Cd27
Eno1	1.55355e-23	0.352051	0.953	0.857	3.09172e-19	3	Eno1
Tnfrsf181	1.63484e-23	0.339405	0.839	0.747	3.2535e-19	3	Tnfrsf18
Zeb2	2.79478e-23	0.289774	0.385	0.216	5.5619e-19	3	Zeb2
Vgll4	4.26501e-23	0.325195	0.577	0.404	8.48779e-19	3	Vgll4
Ehd1	5.08675e-23	0.326707	0.583	0.412	1.01232e-18	3	Ehd1
Smim3	6.53475e-23	0.287348	0.432	0.269	1.30048e-18	3	Smim3
Chic2	6.83139e-22	0.26565	0.814	0.698	1.35952e-17	3	Chic2
H2-T23	7.96958e-22	0.252563	0.93	0.897	1.58603e-17	3	H2-T23
Bsg	8.84348e-22	0.292835	0.869	0.759	1.75994e-17	3	Bsg
Alcam1	1.21062e-21	0.261849	0.534	0.383	2.40925e-17	3	Alcam
Il12rb2	2.40368e-21	0.289989	0.493	0.333	4.78357e-17	3	Il12rb2
Slc2a1	3.42259e-21	0.320975	0.482	0.313	6.81129e-17	3	Slc2a1
Csf1	5.23264e-21	0.300657	0.503	0.341	1.04135e-16	3	Csf1
AW1120101	1.13217e-20	0.327101	0.995	0.989	2.25313e-16	3	AW112010
Pold4	1.65628e-20	0.270187	0.711	0.608	3.29616e-16	3	Pold4
Slc16a3	1.66159e-20	0.322412	0.342	0.182	3.30673e-16	3	Slc16a3
Dap	1.9484e-20	0.275062	0.757	0.632	3.87751e-16	3	Dap
Pgam1	4.91843e-20	0.276942	0.901	0.772	9.78817e-16	3	Pgam1
Plk2	8.3689e-20	0.311434	0.187	0.074	1.66549e-15	3	Plk2
Cst71	2.61305e-19	0.256397	0.907	0.784	5.20023e-15	3	Cst7
Ptprs1	4.91118e-19	0.268987	0.379	0.216	9.77374e-15	3	Ptprs
Runx2	1.63577e-18	0.273991	0.682	0.554	3.25535e-14	3	Runx2
Junb	2.38303e-18	0.498641	0.92	0.843	4.74246e-14	3	Junb
Acot91	5.23767e-18	0.250596	0.56	0.425	1.04235e-13	3	Acot9
Higd1a	7.25302e-18	0.306159	0.849	0.755	1.44342e-13	3	Higd1a
Ccng2	9.1871e-18	0.269785	0.431	0.27	1.82832e-13	3	Ccng2
Gem	1.00882e-17	0.396959	0.682	0.56	2.00765e-13	3	Gem
Fosl2	1.73063e-17	0.296696	0.586	0.436	3.44413e-13	3	Fosl2
Msi21	2.02259e-17	0.2528	0.618	0.48	4.02515e-13	3	Msi2
Nrgn1	3.37367e-17	0.572159	0.684	0.533	6.71395e-13	3	Nrgn
Fhl2	4.88616e-17	0.263183	0.452	0.311	9.72394e-13	3	Fhl2
Ece1	9.03474e-17	0.253291	0.447	0.313	1.798e-12	3	Ece1
Pim11	1.57265e-16	0.26474	0.646	0.469	3.12973e-12	3	Pim1
Gadd45b	2.0121e-16	0.440929	0.512	0.336	4.00429e-12	3	Gadd45b
Satb1	4.0511e-16	0.298907	0.734	0.627	8.06209e-12	3	Satb1
Capg1	9.11263e-16	0.257279	0.918	0.792	1.8135e-11	3	Capg
Pik3r11	3.14586e-15	0.335084	0.585	0.458	6.26057e-11	3	Pik3r1
Tmem123	3.21508e-15	0.260499	0.7	0.584	6.39832e-11	3	Tmem123
Ttc39c	5.27152e-15	0.261272	0.387	0.231	1.04909e-10	3	Ttc39c
Impa2	8.33546e-15	0.275629	0.556	0.457	1.65884e-10	3	Impa2
Rel	1.12478e-14	0.348763	0.548	0.429	2.23842e-10	3	Rel
Ubash3b	1.12647e-14	0.254669	0.512	0.398	2.24179e-10	3	Ubash3b
Ccl3	1.89495e-14	0.84355	0.508	0.416	3.77115e-10	3	Ccl3
Sytl3	1.95784e-14	0.288593	0.426	0.306	3.8963e-10	3	Sytl3
Gpm6b1	4.24249e-14	0.252871	0.415	0.262	8.44297e-10	3	Gpm6b
Aebp2	3.58095e-13	0.273246	0.715	0.604	7.12645e-09	3	Aebp2
Cd44	1.80023e-12	0.262114	0.64	0.531	3.58264e-08	3	Cd44
Bnip3	2.74334e-12	0.358413	0.345	0.219	5.45952e-08	3	Bnip3
Cdkn1a	4.04596e-12	0.276348	0.223	0.113	8.05186e-08	3	Cdkn1a
Nfkbia	1.43968e-11	0.356741	0.779	0.665	2.86511e-07	3	Nfkbia
Hist1h1c	1.73968e-11	0.455897	0.441	0.344	3.46213e-07	3	Hist1h1c
Ndrg11	2.42837e-11	0.267709	0.377	0.257	4.83269e-07	3	Ndrg1
Rora1	5.90585e-11	0.352521	0.488	0.354	1.17532e-06	3	Rora
Ero1l	1.01882e-10	0.284678	0.43	0.321	2.02755e-06	3	Ero1l
Spry11	1.15457e-10	0.253663	0.356	0.22	2.2977e-06	3	Spry1
Ccl51	2.11455e-10	0.408245	0.692	0.635	4.20817e-06	3	Ccl5
Tnfrsf41	2.89336e-10	0.45572	0.54	0.405	5.75808e-06	3	Tnfrsf4
Ccr71	1.29294e-09	0.772476	0.312	0.205	2.57307e-05	3	Ccr7
Plac81	1.84463e-09	0.388026	0.625	0.548	3.671e-05	3	Plac8
Il1r2	3.3706e-09	0.312244	0.173	0.084	6.70783e-05	3	Il1r2
Areg	8.41769e-09	0.837842	0.109	0.051	0.00016752	3	Areg
Ly6a1	2.08384e-08	0.533852	0.528	0.456	0.000414705	3	Ly6a
Gzme1	3.2592e-06	0.754201	0.219	0.148	0.0648614	3	Gzme
Gzmb1	0.000340143	0.368193	0.74	0.68	1	3	Gzmb
Serpinb9b1	0.00105989	0.352651	0.177	0.102	1	3	Serpinb9b
Gzmd1	0.00170356	0.818522	0.237	0.185	1	3	Gzmd
Gm12840	0.00658109	0.265278	0.378	0.303	1	3	Gm12840
Mcm3	1.62327e-142	0.645772	0.779	0.188	3.23047e-138	4	Mcm3
Mcm5	1.51326e-141	0.629959	0.769	0.197	3.01155e-137	4	Mcm5
Dut	2.78161e-135	0.737724	0.964	0.574	5.53568e-131	4	Dut
Ptma	3.1767e-132	0.495799	1	0.994	6.32196e-128	4	Ptma
Mcm6	1.74629e-125	0.631859	0.766	0.222	3.4753e-121	4	Mcm6
Ranbp1	3.28406e-123	0.594513	0.977	0.672	6.53561e-119	4	Ranbp1
Lig1	5.96188e-122	0.626534	0.714	0.184	1.18647e-117	4	Lig1
Stmn1	7.52466e-113	0.561228	0.826	0.256	1.49748e-108	4	Stmn1
Mcm2	1.73058e-112	0.504317	0.682	0.167	3.44402e-108	4	Mcm2
Hells	7.25644e-105	0.547874	0.712	0.205	1.4441e-100	4	Hells
Ran	7.98098e-105	0.482158	0.996	0.855	1.58829e-100	4	Ran
Tipin	3.02367e-101	0.53589	0.799	0.285	6.0174e-97	4	Tipin
Mcm4	2.80755e-100	0.490164	0.702	0.216	5.58731e-96	4	Mcm4
Nme1	8.78079e-100	0.52039	0.991	0.758	1.74746e-95	4	Nme1
Ppia	7.79095e-97	0.334867	1	0.998	1.55048e-92	4	Ppia
Ybx1	4.50888e-93	0.407663	0.997	0.939	8.97313e-89	4	Ybx1
Ung	3.78088e-92	0.385164	0.468	0.065	7.52434e-88	4	Ung
Mcm7	1.45116e-91	0.446792	0.646	0.172	2.88796e-87	4	Mcm7
Tfdp1	4.39166e-86	0.360149	0.679	0.232	8.73985e-82	4	Tfdp1
Eif5a	1.52108e-84	0.403573	0.995	0.923	3.02711e-80	4	Eif5a
Cdca7	3.73124e-84	0.359635	0.476	0.087	7.42553e-80	4	Cdca7
Slc25a5	3.23225e-83	0.417891	0.994	0.885	6.4325e-79	4	Slc25a5
Snrpd1	5.15975e-78	0.428919	0.961	0.603	1.02684e-73	4	Snrpd1
Gmnn	8.69109e-76	0.404612	0.698	0.253	1.72961e-71	4	Gmnn
Dnmt1	4.15477e-73	0.316173	0.636	0.234	8.2684e-69	4	Dnmt1
Nasp	6.41543e-72	0.379959	0.769	0.332	1.27673e-67	4	Nasp
Siva1	5.5224e-71	0.408107	0.786	0.328	1.09901e-66	4	Siva1
Rbm3	8.86985e-70	0.279447	0.999	0.982	1.76519e-65	4	Rbm3
Pcna	1.0702e-69	0.38321	0.758	0.331	2.12981e-65	4	Pcna
Tk1	2.04961e-68	0.351146	0.541	0.151	4.07892e-64	4	Tk1
Gins2	3.44988e-68	0.328957	0.478	0.106	6.8656e-64	4	Gins2
Rps2	3.49382e-67	0.310252	1	0.989	6.95306e-63	4	Rps2
C1qbp	5.36214e-67	0.378358	0.881	0.497	1.06712e-62	4	C1qbp
Dctpp1	6.57836e-66	0.365454	0.736	0.319	1.30916e-61	4	Dctpp1
Ldha	1.14882e-64	0.420865	0.997	0.91	2.28627e-60	4	Ldha
E2f1	2.93528e-64	0.297114	0.405	0.071	5.8415e-60	4	E2f1
Prdx1	5.33344e-64	0.351944	0.985	0.828	1.06141e-59	4	Prdx1
Txn1	8.11207e-64	0.337125	0.998	0.925	1.61438e-59	4	Txn1
Set	1.26012e-63	0.365551	0.988	0.831	2.50776e-59	4	Set
Rfc3	6.99522e-63	0.327097	0.593	0.207	1.39212e-58	4	Rfc3
Dnajc9	2.96907e-62	0.390551	0.925	0.578	5.90875e-58	4	Dnajc9
Rfc2	5.53702e-62	0.403239	0.828	0.408	1.10192e-57	4	Rfc2
Rps17	7.9795e-62	0.28899	0.998	0.961	1.588e-57	4	Rps17
Eif4a1	2.32094e-61	0.360194	0.987	0.834	4.61891e-57	4	Eif4a1
Prim1	5.63017e-61	0.29679	0.5	0.131	1.12046e-56	4	Prim1
Cox5a	3.40909e-60	0.334568	0.994	0.903	6.78443e-56	4	Cox5a
Hint1	6.74759e-60	0.32816	0.997	0.899	1.34284e-55	4	Hint1
Dhfr	3.14129e-59	0.340814	0.454	0.117	6.25147e-55	4	Dhfr
Topbp1	4.66888e-59	0.293704	0.581	0.205	9.29154e-55	4	Topbp1
Npm1	2.93587e-58	0.302295	0.998	0.969	5.84268e-54	4	Npm1
Hnrnpab	2.0887e-57	0.379344	0.952	0.625	4.15673e-53	4	Hnrnpab
Cisd1	8.57159e-57	0.365809	0.773	0.355	1.70583e-52	4	Cisd1
Ppp1r14b	8.61702e-57	0.365922	0.844	0.472	1.71487e-52	4	Ppp1r14b
Fabp5	1.66782e-56	0.364656	0.674	0.271	3.31913e-52	4	Fabp5
Syce2	2.26e-56	0.287907	0.452	0.122	4.49763e-52	4	Syce2
Srsf7	4.77984e-56	0.333679	0.88	0.524	9.51237e-52	4	Srsf7
Pa2g4	3.20243e-55	0.375231	0.878	0.496	6.37315e-51	4	Pa2g4
Nop58	6.42993e-55	0.351815	0.811	0.422	1.27962e-50	4	Nop58
Nap1l1	1.56896e-53	0.373088	0.947	0.66	3.12239e-49	4	Nap1l1
Pfn1	3.36135e-53	0.255754	1	0.995	6.68941e-49	4	Pfn1
Dtymk	3.61059e-53	0.342296	0.733	0.346	7.18543e-49	4	Dtymk
Anp32b	1.22212e-52	0.284505	0.991	0.841	2.43214e-48	4	Anp32b
Rfc4	2.4404e-52	0.273372	0.514	0.176	4.85663e-48	4	Rfc4
Cdk4	3.32908e-52	0.328761	0.814	0.414	6.62519e-48	4	Cdk4
Phgdh	4.80238e-52	0.302124	0.679	0.3	9.55721e-48	4	Phgdh
Tyms	5.03553e-52	0.287711	0.545	0.195	1.00212e-47	4	Tyms
Tkt	1.64833e-51	0.346554	0.907	0.577	3.28035e-47	4	Tkt
Nhp2	1.89623e-51	0.326102	0.839	0.467	3.7737e-47	4	Nhp2
Snrpa1	1.32298e-50	0.288213	0.803	0.448	2.63286e-46	4	Snrpa1
Orc6	4.997e-50	0.309618	0.562	0.186	9.94452e-46	4	Orc6
Srsf2	1.76224e-49	0.326189	0.962	0.704	3.50703e-45	4	Srsf2
Hnrnpa3	3.79522e-49	0.259057	0.994	0.872	7.55287e-45	4	Hnrnpa3
H2afz	2.89733e-48	0.28807	0.994	0.896	5.76597e-44	4	H2afz
Fbl	3.02953e-47	0.262746	0.833	0.488	6.02907e-43	4	Fbl
Snrpb	3.85227e-47	0.276436	0.98	0.782	7.66641e-43	4	Snrpb
Eno3	3.07711e-46	0.415625	0.443	0.14	6.12375e-42	4	Eno3
Alyref	1.41374e-45	0.309596	0.836	0.453	2.81348e-41	4	Alyref
Phb	1.64262e-45	0.254445	0.734	0.385	3.26898e-41	4	Phb
Paics	1.68132e-45	0.271724	0.758	0.398	3.34599e-41	4	Paics
Nop56	2.05312e-45	0.266762	0.731	0.357	4.08592e-41	4	Nop56
Rps27l	2.91933e-45	0.33196	0.938	0.67	5.80976e-41	4	Rps27l
Lgals1	2.69317e-44	0.334008	0.999	0.967	5.35968e-40	4	Lgals1
Psmb2	2.98441e-44	0.305256	0.945	0.683	5.93927e-40	4	Psmb2
Slbp	1.77414e-43	0.306764	0.83	0.477	3.53072e-39	4	Slbp
Gar1	2.19613e-43	0.265295	0.665	0.307	4.37052e-39	4	Gar1
Hat1	3.59647e-43	0.268946	0.635	0.282	7.15733e-39	4	Hat1
Sdf2l1	1.13416e-42	0.324892	0.761	0.401	2.2571e-38	4	Sdf2l1
Polr2l	2.40683e-42	0.273041	0.859	0.54	4.78982e-38	4	Polr2l
Rpa3	3.21675e-42	0.268629	0.725	0.367	6.40165e-38	4	Rpa3
Anapc5	2.86014e-41	0.258001	0.736	0.37	5.69196e-37	4	Anapc5
Mrpl12	1.94597e-40	0.280802	0.803	0.435	3.87267e-36	4	Mrpl12
Atp5f1	4.07199e-40	0.269741	0.993	0.875	8.10367e-36	4	Atp5f1
Phb2	4.52323e-40	0.302114	0.929	0.665	9.00169e-36	4	Phb2
Cct6a	4.79769e-40	0.267399	0.852	0.543	9.54789e-36	4	Cct6a
Eif2s1	1.74979e-39	0.285379	0.881	0.564	3.48227e-35	4	Eif2s1
Cbx3	4.65586e-39	0.269412	0.961	0.71	9.26563e-35	4	Cbx3
Cct3	5.52219e-39	0.266225	0.837	0.511	1.09897e-34	4	Cct3
G3bp1	5.5709e-39	0.253986	0.909	0.611	1.10866e-34	4	G3bp1
Prmt1	3.35282e-38	0.26512	0.837	0.513	6.67245e-34	4	Prmt1
Pole4	7.30258e-38	0.261779	0.878	0.528	1.45329e-33	4	Pole4
Rexo2	7.47036e-38	0.28865	0.875	0.55	1.48668e-33	4	Rexo2
Magohb	8.27218e-38	0.250895	0.702	0.376	1.64625e-33	4	Magohb
Cbx5	1.13899e-37	0.254691	0.597	0.261	2.2667e-33	4	Cbx5
Actb	1.53751e-37	0.261848	1	1	3.05979e-33	4	Actb
Atp5g1	2.02115e-37	0.271496	0.954	0.727	4.02229e-33	4	Atp5g1
Rbbp7	2.25426e-37	0.281219	0.829	0.475	4.4862e-33	4	Rbbp7
Pkm1	2.54927e-37	0.275886	0.996	0.904	5.07331e-33	4	Pkm
Impdh2	2.57376e-37	0.258152	0.697	0.334	5.12204e-33	4	Impdh2
Mif	2.63343e-36	0.300792	0.992	0.847	5.24078e-32	4	Mif
Cox6a1	3.37174e-36	0.265692	0.959	0.759	6.7101e-32	4	Cox6a1
Snrpf	4.01057e-36	0.258079	0.957	0.724	7.98143e-32	4	Snrpf
Ndufa4	4.51844e-36	0.26325	0.983	0.858	8.99214e-32	4	Ndufa4
Psma4	9.86392e-36	0.253648	0.959	0.762	1.96302e-31	4	Psma4
Ncl	1.64998e-35	0.255237	0.976	0.829	3.28362e-31	4	Ncl
Ndufab1	5.03193e-35	0.256784	0.858	0.534	1.0014e-30	4	Ndufab1
Snu13	1.79136e-34	0.252407	0.936	0.652	3.56499e-30	4	Snu13
Eif1ax	2.1529e-34	0.251556	0.884	0.595	4.28449e-30	4	Eif1ax
Erh	4.50841e-34	0.281011	0.848	0.504	8.97219e-30	4	Erh
Vim1	7.78757e-34	0.306706	0.993	0.903	1.5498e-29	4	Vim
Dpy30	9.54958e-34	0.254691	0.85	0.507	1.90046e-29	4	Dpy30
Hpf1	1.24586e-33	0.253566	0.828	0.497	2.47938e-29	4	Hpf1
Hnrnpa1	1.24805e-33	0.280546	0.962	0.774	2.48374e-29	4	Hnrnpa1
Rsl1d1	1.97702e-33	0.259362	0.863	0.564	3.93448e-29	4	Rsl1d1
Smc1a	3.58938e-33	0.274044	0.792	0.442	7.14322e-29	4	Smc1a
Banf1	4.61252e-33	0.265212	0.876	0.519	9.17938e-29	4	Banf1
Eno11	1.22199e-32	0.297325	0.989	0.853	2.43188e-28	4	Eno1
Pdia6	5.05564e-32	0.27378	0.899	0.632	1.00612e-27	4	Pdia6
1810037I17Rik	2.5844e-31	0.278095	0.98	0.821	5.14322e-27	4	1810037I17Rik
Tfrc	2.66207e-31	0.27039	0.633	0.315	5.29778e-27	4	Tfrc
Hprt	3.88285e-31	0.253853	0.943	0.673	7.72727e-27	4	Hprt
Spp11	9.54485e-31	0.487346	0.871	0.636	1.89952e-26	4	Spp1
Pgk11	1.6441e-30	0.286929	0.989	0.846	3.27193e-26	4	Pgk1
Cycs	1.0787e-29	0.264707	0.973	0.747	2.14672e-25	4	Cycs
Tpi11	3.86996e-29	0.259788	0.958	0.72	7.7016e-25	4	Tpi1
Pgam11	1.22409e-28	0.292426	0.958	0.765	2.43606e-24	4	Pgam1
Cdk61	2.61075e-26	0.260906	0.761	0.466	5.19566e-22	4	Cdk6
Aprt	3.17351e-25	0.27094	0.944	0.759	6.31561e-21	4	Aprt
S100a41	5.68317e-21	0.275459	0.974	0.86	1.13101e-16	4	S100a4
Gzmb2	4.42027e-18	0.459732	0.833	0.669	8.79679e-14	4	Gzmb
Gzmc1	7.49532e-18	0.595912	0.313	0.166	1.49164e-13	4	Gzmc
Prf11	9.06823e-17	0.336921	0.865	0.673	1.80467e-12	4	Prf1
Fcer1g1	4.14243e-15	0.421513	0.324	0.177	8.24384e-11	4	Fcer1g
Gzmf1	7.00813e-11	0.571269	0.439	0.295	1.39469e-06	4	Gzmf
Pclaf	0	2.01351	0.966	0.136	0	5	Pclaf
Birc5	0	1.74749	0.973	0.059	0	5	Birc5
Cks1b	7.36567e-304	1.34816	0.955	0.123	1.46584e-299	5	Cks1b
Cdca8	6.22959e-299	1.22657	0.925	0.053	1.23975e-294	5	Cdca8
Stmn11	6.23022e-294	1.93457	0.99	0.236	1.23988e-289	5	Stmn1
Mki67	1.06333e-293	1.63014	0.946	0.129	2.11614e-289	5	Mki67
Ccna2	3.82175e-289	1.10661	0.876	0.024	7.60566e-285	5	Ccna2
Hmgb2	1.56349e-286	1.69985	0.999	0.844	3.11149e-282	5	Hmgb2
H2afz1	5.14384e-286	1.29398	1	0.896	1.02368e-281	5	H2afz
Spc24	6.70076e-276	1.08626	0.899	0.069	1.33352e-271	5	Spc24
Top2a	1.13077e-265	1.66499	0.903	0.176	2.25034e-261	5	Top2a
Tubb5	3.04749e-265	1.81118	0.991	0.787	6.06481e-261	5	Tubb5
Tpx2	2.63752e-263	0.995924	0.847	0.04	5.24893e-259	5	Tpx2
Ccnb2	1.38519e-260	1.19937	0.844	0.04	2.75666e-256	5	Ccnb2
Smc2	1.65568e-260	1.3066	0.926	0.214	3.29497e-256	5	Smc2
Cdk1	2.37094e-259	1.13498	0.851	0.081	4.7184e-255	5	Cdk1
Tuba1b	2.04569e-258	1.76812	0.97	0.511	4.07113e-254	5	Tuba1b
Ube2c	9.51876e-255	1.83279	0.846	0.071	1.89433e-250	5	Ube2c
Nusap1	2.08176e-253	1.30383	0.812	0.045	4.14291e-249	5	Nusap1
Knl1	5.24145e-249	0.838124	0.807	0.023	1.0431e-244	5	Knl1
Rrm2	5.30358e-242	1.37103	0.829	0.071	1.05547e-237	5	Rrm2
Cdca3	1.37695e-239	0.816396	0.801	0.026	2.74027e-235	5	Cdca3
Hist1h2ap	1.23105e-236	1.6154	0.837	0.101	2.44991e-232	5	Hist1h2ap
Hmmr	1.14653e-233	0.852786	0.736	0.01	2.28172e-229	5	Hmmr
Tacc3	3.23706e-233	0.76396	0.807	0.056	6.44207e-229	5	Tacc3
Cenpf	4.23115e-233	1.27441	0.757	0.024	8.42042e-229	5	Cenpf
Ran1	3.42693e-231	0.912987	0.996	0.855	6.81992e-227	5	Ran
Ptma1	1.16597e-230	0.949327	1	0.994	2.3204e-226	5	Ptma
Cep55	4.39447e-224	0.664831	0.758	0.031	8.74543e-220	5	Cep55
Ube2s	9.70374e-224	1.09389	0.99	0.688	1.93114e-219	5	Ube2s
Hmgn2	4.13246e-220	1.08828	0.967	0.377	8.22402e-216	5	Hmgn2
Cenpe	8.56841e-220	0.903103	0.747	0.034	1.7052e-215	5	Cenpe
Prc1	1.50003e-219	0.917152	0.755	0.049	2.98522e-215	5	Prc1
Asf1b	2.80428e-217	0.8196	0.811	0.078	5.58079e-213	5	Asf1b
Ncapg	3.00089e-217	0.657879	0.758	0.043	5.97208e-213	5	Ncapg
Mad2l1	8.0426e-216	0.659616	0.829	0.103	1.60056e-211	5	Mad2l1
Aurkb	1.48092e-215	0.720565	0.75	0.034	2.94719e-211	5	Aurkb
Hist1h1b	4.48485e-214	1.03643	0.75	0.05	8.92531e-210	5	Hist1h1b
Cdc20	1.38478e-213	0.933596	0.733	0.042	2.75586e-209	5	Cdc20
Kif11	1.91708e-213	0.768837	0.753	0.04	3.81517e-209	5	Kif11
Spc25	6.48213e-211	0.661816	0.709	0.026	1.29001e-206	5	Spc25
Hist1h2ae	4.57184e-208	1.19468	0.793	0.105	9.09842e-204	5	Hist1h2ae
Pttg1	3.22483e-207	1.08773	0.872	0.187	6.41773e-203	5	Pttg1
Hmgb1	1.00637e-205	0.846168	0.994	0.849	2.00278e-201	5	Hmgb1
Selenoh	8.20551e-205	0.931672	0.977	0.433	1.63298e-200	5	Selenoh
Tk11	1.0451e-202	0.813744	0.826	0.115	2.07985e-198	5	Tk1
Racgap1	6.13191e-202	0.775248	0.849	0.139	1.22031e-197	5	Racgap1
Fbxo5	3.07406e-200	0.774922	0.723	0.038	6.11768e-196	5	Fbxo5
Tmpo	7.20959e-200	0.970435	0.952	0.438	1.43478e-195	5	Tmpo
Cenpw	2.84166e-199	0.817259	0.924	0.227	5.65519e-195	5	Cenpw
Ppia1	7.11978e-199	0.544247	1	0.998	1.41691e-194	5	Ppia
Shcbp1	5.78218e-198	0.530732	0.666	0.012	1.15071e-193	5	Shcbp1
Ccdc34	3.15922e-196	0.723972	0.83	0.127	6.28717e-192	5	Ccdc34
Tubb4b	4.1635e-196	1.24204	0.912	0.356	8.28578e-192	5	Tubb4b
Bub1	7.84581e-195	0.512489	0.637	0.009	1.56139e-190	5	Bub1
Cks2	3.57172e-189	1.00093	0.902	0.31	7.10809e-185	5	Cks2
Nucks1	2.99178e-188	0.868898	0.982	0.602	5.95394e-184	5	Nucks1
H2afx	3.01513e-187	1.10419	0.853	0.229	6.00041e-183	5	H2afx
Lmnb1	4.42134e-187	0.89492	0.915	0.292	8.79892e-183	5	Lmnb1
Ska1	1.00241e-186	0.486271	0.654	0.016	1.9949e-182	5	Ska1
Cenpm	1.0612e-184	0.519299	0.72	0.05	2.1119e-180	5	Cenpm
Esco2	9.77671e-183	0.627347	0.629	0.009	1.94566e-178	5	Esco2
Tyms1	1.61058e-181	0.87695	0.821	0.16	3.20521e-177	5	Tyms
Ckap2l	2.13783e-181	0.530132	0.62	0.012	4.2545e-177	5	Ckap2l
Ndc80	2.54441e-180	0.507497	0.637	0.016	5.06363e-176	5	Ndc80
Incenp	1.93163e-177	0.69954	0.775	0.123	3.84413e-173	5	Incenp
Sgo2a	6.17981e-176	0.514779	0.613	0.018	1.22984e-171	5	Sgo2a
Anp32b1	8.15878e-175	0.734458	0.994	0.841	1.62368e-170	5	Anp32b
Bub1b	1.49842e-173	0.481057	0.609	0.012	2.98201e-169	5	Bub1b
Ccnb1	4.75674e-173	0.676779	0.624	0.026	9.46639e-169	5	Ccnb1
Clspn	5.81894e-173	0.666284	0.704	0.08	1.15803e-168	5	Clspn
Rrm1	1.63203e-172	0.707937	0.801	0.16	3.2479e-168	5	Rrm1
Smc4	3.78118e-172	0.920117	0.954	0.557	7.52493e-168	5	Smc4
Nuf2	1.04419e-171	0.461503	0.601	0.008	2.07804e-167	5	Nuf2
Anp32e	9.14589e-171	0.759504	0.963	0.487	1.82012e-166	5	Anp32e
Dlgap5	4.39668e-169	0.507989	0.642	0.04	8.74983e-165	5	Dlgap5
Knstrn	5.75341e-169	0.637267	0.736	0.073	1.14499e-164	5	Knstrn
Rad51	1.19767e-167	0.55729	0.677	0.055	2.38348e-163	5	Rad51
Lockd	2.37609e-167	0.714288	0.777	0.126	4.72866e-163	5	Lockd
Kif4	7.97541e-166	0.467544	0.586	0.01	1.58719e-161	5	Kif4
Cenpa1	4.96587e-163	1.04794	0.936	0.477	9.88257e-159	5	Cenpa
Diaph3	3.28522e-162	0.514116	0.636	0.033	6.53791e-158	5	Diaph3
H2afv	1.77416e-160	0.962841	0.976	0.582	3.53075e-156	5	H2afv
Hmgb3	3.02696e-159	0.636953	0.818	0.187	6.02396e-155	5	Hmgb3
Kif22	1.37164e-157	0.463773	0.598	0.021	2.7297e-153	5	Kif22
Ezh2	2.28166e-157	0.727426	0.891	0.323	4.54074e-153	5	Ezh2
Kif20b	7.44984e-157	0.558688	0.671	0.066	1.48259e-152	5	Kif20b
Pbk	8.41311e-157	0.491193	0.583	0.014	1.67429e-152	5	Pbk
Dek	1.22626e-156	0.805867	0.972	0.67	2.44037e-152	5	Dek
Rad51ap1	7.33849e-155	0.491019	0.618	0.033	1.46043e-150	5	Rad51ap1
Dut1	9.89206e-155	0.904268	0.962	0.575	1.96862e-150	5	Dut
Kif23	2.72739e-154	0.490492	0.561	0.009	5.42778e-150	5	Kif23
Cdca5	4.20135e-154	0.423931	0.561	0.011	8.36112e-150	5	Cdca5
Plk1	3.09218e-149	0.443897	0.533	0.005	6.15375e-145	5	Plk1
Ncapd2	1.87185e-145	0.402704	0.589	0.034	3.72517e-141	5	Ncapd2
Cdkn3	4.30867e-145	0.484849	0.548	0.019	8.57469e-141	5	Cdkn3
Tuba1c	2.97187e-143	0.741692	0.787	0.2	5.91432e-139	5	Tuba1c
Mis18bp1	6.42156e-143	0.444579	0.546	0.019	1.27796e-138	5	Mis18bp1
Gmnn1	5.31111e-142	0.664628	0.824	0.238	1.05696e-137	5	Gmnn
Ckap2	3.89297e-141	0.40585	0.519	0.014	7.74741e-137	5	Ckap2
Neil3	4.35277e-141	0.415198	0.53	0.011	8.66245e-137	5	Neil3
Sgo1	1.91859e-140	0.394579	0.535	0.013	3.81819e-136	5	Sgo1
Rad21	2.17282e-138	0.633313	0.882	0.328	4.32412e-134	5	Rad21
Ncaph	3.44483e-138	0.382114	0.548	0.03	6.85556e-134	5	Ncaph
Anapc51	1.43765e-136	0.544847	0.891	0.351	2.86106e-132	5	Anapc5
Depdc1a	3.04682e-136	0.359756	0.503	0.015	6.06347e-132	5	Depdc1a
Pmf1	5.13232e-136	0.481248	0.716	0.121	1.02138e-131	5	Pmf1
Cenph	1.86001e-135	0.392658	0.578	0.046	3.7016e-131	5	Cenph
Pimreg	2.53869e-135	0.443051	0.478	0.004	5.05224e-131	5	Pimreg
Rangap1	2.77857e-135	0.510683	0.844	0.261	5.52963e-131	5	Rangap1
Hist1h3c	5.53467e-135	0.423766	0.505	0.015	1.10145e-130	5	Hist1h3c
Hint11	6.55118e-135	0.510121	0.993	0.9	1.30375e-130	5	Hint1
Arhgap11a	2.28998e-134	0.414828	0.566	0.04	4.55729e-130	5	Arhgap11a
Hnrnpab1	4.85597e-134	0.709276	0.962	0.624	9.66387e-130	5	Hnrnpab
Ybx11	1.36947e-133	0.532096	0.999	0.939	2.72539e-129	5	Ybx1
Kif2c	1.48798e-132	0.34063	0.47	0.003	2.96122e-128	5	Kif2c
Ly6e	2.13187e-131	0.918038	0.955	0.601	4.24263e-127	5	Ly6e
Alyref1	1.66816e-130	0.659215	0.911	0.444	3.3198e-126	5	Alyref
Uhrf1	6.71207e-130	0.498827	0.647	0.099	1.33577e-125	5	Uhrf1
Cdc45	8.44298e-130	0.382068	0.572	0.049	1.68024e-125	5	Cdc45
Lsm2	1.40295e-129	0.554487	0.886	0.316	2.79202e-125	5	Lsm2
Trip13	1.62842e-129	0.336119	0.529	0.025	3.24072e-125	5	Trip13
Mxd3	1.64337e-129	0.41467	0.483	0.007	3.27047e-125	5	Mxd3
Ncapd3	1.67697e-129	0.548688	0.717	0.149	3.33734e-125	5	Ncapd3
Cenpp	5.4586e-129	0.348342	0.515	0.022	1.08632e-124	5	Cenpp
Cit	2.0219e-128	0.356676	0.488	0.015	4.02378e-124	5	Cit
Lig11	2.52345e-128	0.681134	0.764	0.179	5.02192e-124	5	Lig1
Cbx31	2.8029e-128	0.586795	0.98	0.708	5.57805e-124	5	Cbx3
Plk4	4.34929e-128	0.381824	0.615	0.086	8.65553e-124	5	Plk4
Rfc41	1.2067e-126	0.476217	0.712	0.151	2.40144e-122	5	Rfc4
Rbm31	2.22831e-126	0.435012	1	0.981	4.43456e-122	5	Rbm3
C330027C09Rik	6.28347e-124	0.342492	0.494	0.023	1.25047e-119	5	C330027C09Rik
Aspm	2.72572e-123	0.421568	0.455	0.004	5.42446e-119	5	Aspm
Banf11	5.04828e-123	0.52585	0.947	0.51	1.00466e-118	5	Banf1
Sapcd2	7.45857e-123	0.384432	0.465	0.012	1.48433e-118	5	Sapcd2
Cmc2	1.52363e-122	0.515199	0.825	0.228	3.03217e-118	5	Cmc2
Hdgf	4.78634e-121	0.636972	0.965	0.543	9.52529e-117	5	Hdgf
Lrr1	9.82091e-121	0.313742	0.467	0.015	1.95446e-116	5	Lrr1
Lsm5	1.70354e-119	0.556639	0.966	0.687	3.39021e-115	5	Lsm5
Snrpd11	2.10458e-119	0.619217	0.952	0.605	4.18833e-115	5	Snrpd1
Melk	8.89104e-119	0.306827	0.473	0.015	1.76941e-114	5	Melk
Aurka	8.54573e-118	0.344511	0.446	0.013	1.70069e-113	5	Aurka
Cdca2	1.679e-117	0.341948	0.49	0.02	3.34137e-113	5	Cdca2
Ube2t	7.6918e-117	0.365826	0.61	0.086	1.53075e-112	5	Ube2t
Kif20a	9.89242e-117	0.309858	0.43	0.005	1.96869e-112	5	Kif20a
Rfc5	1.72099e-114	0.447687	0.733	0.163	3.42494e-110	5	Rfc5
Srsf3	1.35085e-113	0.579591	0.982	0.828	2.68832e-109	5	Srsf3
Nap1l11	2.80054e-113	0.5805	0.965	0.658	5.57336e-109	5	Nap1l1
Nrm	6.40782e-112	0.433084	0.662	0.117	1.27522e-107	5	Nrm
Dbf4	1.36393e-111	0.380096	0.688	0.167	2.71436e-107	5	Dbf4
Reep4	2.74519e-111	0.443877	0.615	0.107	5.4632e-107	5	Reep4
Hsp90b1	3.7785e-111	0.574345	0.994	0.818	7.5196e-107	5	Hsp90b1
Ddx39	8.03879e-111	0.539161	0.886	0.396	1.5998e-106	5	Ddx39
Anapc15	1.47989e-110	0.370732	0.724	0.194	2.94513e-106	5	Anapc15
Usp1	2.26292e-110	0.485229	0.827	0.298	4.50344e-106	5	Usp1
Tagln2	2.6604e-110	0.628823	0.992	0.846	5.29447e-106	5	Tagln2
Tipin1	3.09985e-110	0.579411	0.801	0.286	6.169e-106	5	Tipin
Tubg1	2.1378e-109	0.393878	0.638	0.113	4.25444e-105	5	Tubg1
Txn11	7.05011e-109	0.482023	0.996	0.926	1.40304e-104	5	Txn1
Foxm1	2.13516e-108	0.290689	0.43	0.011	4.24918e-104	5	Foxm1
Ncapg2	2.99933e-108	0.325804	0.501	0.044	5.96897e-104	5	Ncapg2
Spdl1	1.33975e-107	0.262819	0.425	0.018	2.66623e-103	5	Spdl1
Orc61	2.25178e-107	0.440499	0.681	0.172	4.48128e-103	5	Orc6
Lsm3	8.75453e-107	0.44761	0.857	0.31	1.74224e-102	5	Lsm3
Dhfr1	2.29722e-106	0.418081	0.588	0.101	4.5717e-102	5	Dhfr
Hirip3	7.97698e-106	0.371704	0.555	0.082	1.5875e-101	5	Hirip3
Mcm71	5.90492e-105	0.530135	0.706	0.165	1.17514e-100	5	Mcm7
Hjurp	5.95031e-105	0.372866	0.585	0.085	1.18417e-100	5	Hjurp
Fen1	3.23475e-104	0.462982	0.707	0.167	6.43747e-100	5	Fen1
Haus4	1.08529e-103	0.336166	0.625	0.128	2.15984e-99	5	Haus4
Mcm51	1.36353e-103	0.511666	0.757	0.2	2.71357e-99	5	Mcm5
Ect2	1.75486e-103	0.296744	0.43	0.014	3.49236e-99	5	Ect2
Smc1a1	2.862e-103	0.58781	0.899	0.429	5.69567e-99	5	Smc1a
Ttk	4.10316e-103	0.278595	0.4	0.004	8.1657e-99	5	Ttk
Cdc25b	4.29845e-102	0.370181	0.512	0.067	8.55435e-98	5	Cdc25b
Rpa31	1.56154e-101	0.492707	0.846	0.352	3.10762e-97	5	Rpa3
Impdh21	1.76532e-101	0.453652	0.835	0.317	3.51316e-97	5	Impdh2
Fignl1	3.64927e-101	0.270905	0.479	0.047	7.26242e-97	5	Fignl1
Apitd1	4.74943e-101	0.298943	0.543	0.093	9.45184e-97	5	Apitd1
Fkbp2	6.39683e-101	0.508042	0.889	0.344	1.27303e-96	5	Fkbp2
Cenpk	1.51468e-100	0.305023	0.486	0.042	3.01436e-96	5	Cenpk
Nasp1	1.5821e-100	0.520696	0.805	0.328	3.14853e-96	5	Nasp
Snrpe	6.79184e-100	0.453131	0.993	0.906	1.35164e-95	5	Snrpe
Hist1h1e	8.54584e-100	0.51725	0.753	0.236	1.70071e-95	5	Hist1h1e
Cdkn2c	1.29185e-98	0.36058	0.587	0.13	2.57091e-94	5	Cdkn2c
Prr11	1.63632e-98	0.277216	0.375	0.005	3.25645e-94	5	Prr11
Srsf21	7.04383e-97	0.538462	0.973	0.703	1.40179e-92	5	Srsf2
Dck	9.56604e-97	0.324657	0.545	0.089	1.90374e-92	5	Dck
Tcf19	1.85731e-96	0.379111	0.512	0.063	3.69623e-92	5	Tcf19
Hells1	9.04102e-96	0.448329	0.7	0.207	1.79925e-91	5	Hells
Hist1h4d	1.80741e-95	0.38078	0.593	0.109	3.59692e-91	5	Hist1h4d
Spag5	2.44056e-95	0.259117	0.379	0.008	4.85695e-91	5	Spag5
Hnrnpa31	7.71745e-95	0.483042	0.992	0.873	1.53585e-90	5	Hnrnpa3
Cbx51	1.92041e-94	0.46118	0.774	0.239	3.82181e-90	5	Cbx5
Hmgn5	4.00419e-93	0.380922	0.756	0.229	7.96873e-89	5	Hmgn5
Mcm31	6.40955e-93	0.442656	0.691	0.2	1.27557e-88	5	Mcm3
Ska2	7.74609e-93	0.27878	0.486	0.055	1.54155e-88	5	Ska2
Cenpl	8.89152e-93	0.31957	0.541	0.085	1.7695e-88	5	Cenpl
Siva11	1.66049e-92	0.471419	0.777	0.33	3.30454e-88	5	Siva1
Ranbp11	1.9676e-92	0.603388	0.953	0.676	3.91573e-88	5	Ranbp1
Bub3	9.09634e-90	0.485911	0.898	0.505	1.81026e-85	5	Bub3
Ckap5	2.61225e-88	0.393142	0.642	0.145	5.19865e-84	5	Ckap5
Rfc31	4.73149e-88	0.394969	0.68	0.197	9.41615e-84	5	Rfc3
Hnrnpa2b1	4.93633e-88	0.400731	0.995	0.907	9.82379e-84	5	Hnrnpa2b1
Ncaph2	8.56925e-88	0.325468	0.723	0.215	1.70537e-83	5	Ncaph2
Kif151	8.95585e-88	0.313293	0.716	0.221	1.7823e-83	5	Kif15
Exosc8	9.13169e-88	0.404453	0.882	0.4	1.8173e-83	5	Exosc8
Lbr	1.41594e-87	0.394155	0.868	0.357	2.81786e-83	5	Lbr
Kpna2	4.2012e-87	0.25648	0.411	0.038	8.36081e-83	5	Kpna2
Dctpp11	4.37685e-87	0.512004	0.791	0.313	8.71037e-83	5	Dctpp1
Tfdp11	6.00822e-87	0.380882	0.697	0.23	1.1957e-82	5	Tfdp1
Prim11	1.22531e-85	0.342385	0.598	0.119	2.43849e-81	5	Prim1
Rcc1	1.38203e-85	0.284657	0.507	0.071	2.75038e-81	5	Rcc1
Dtymk1	1.74634e-85	0.43333	0.805	0.337	3.47538e-81	5	Dtymk
Pcna1	2.66935e-85	0.583722	0.784	0.328	5.31227e-81	5	Pcna
Ssrp1	3.77865e-85	0.483256	0.911	0.515	7.51988e-81	5	Ssrp1
Pola1	4.58986e-84	0.314132	0.516	0.086	9.13428e-80	5	Pola1
Rnaseh2b	7.45576e-84	0.294426	0.574	0.13	1.48377e-79	5	Rnaseh2b
Hnrnpu	1.84746e-83	0.455641	0.975	0.759	3.67663e-79	5	Hnrnpu
Rnaseh2c	4.24895e-83	0.394802	0.882	0.4	8.45584e-79	5	Rnaseh2c
Sdf2l11	6.07623e-83	0.41838	0.854	0.39	1.20923e-78	5	Sdf2l1
Brca1	5.55683e-82	0.266342	0.38	0.025	1.10586e-77	5	Brca1
Nsd2	1.03441e-81	0.405985	0.812	0.317	2.05857e-77	5	Nsd2
Csrp1	1.27234e-81	0.420031	0.801	0.27	2.53208e-77	5	Csrp1
Phgdh1	2.5459e-81	0.445089	0.791	0.286	5.06659e-77	5	Phgdh
Slc25a51	4.34017e-81	0.444744	0.992	0.886	8.63738e-77	5	Slc25a5
Atad2	5.8911e-81	0.468892	0.75	0.256	1.17239e-76	5	Atad2
Mrpl18	7.66458e-81	0.430192	0.934	0.562	1.52533e-76	5	Mrpl18
Atad5	1.06809e-80	0.291047	0.464	0.066	2.1256e-76	5	Atad5
Gins21	1.43095e-80	0.311313	0.527	0.1	2.84773e-76	5	Gins2
Srsf71	2.12054e-79	0.511744	0.907	0.521	4.2201e-75	5	Srsf7
Psat1	1.04013e-78	0.300295	0.637	0.178	2.06997e-74	5	Psat1
Dnmt11	1.11797e-78	0.410393	0.696	0.227	2.22487e-74	5	Dnmt1
Nde1	3.03155e-78	0.309246	0.619	0.151	6.03309e-74	5	Nde1
Jpt1	7.16496e-78	0.488439	0.98	0.792	1.4259e-73	5	Jpt1
Ywhah	1.67058e-77	0.458536	0.967	0.665	3.32462e-73	5	Ywhah
Topbp11	2.86334e-77	0.292707	0.669	0.195	5.69833e-73	5	Topbp1
Mcm41	6.03066e-77	0.343302	0.693	0.218	1.20016e-72	5	Mcm4
Rdm1	8.50525e-77	0.254693	0.535	0.131	1.69263e-72	5	Rdm1
Ppil1	1.2558e-76	0.263625	0.585	0.143	2.49916e-72	5	Ppil1
Ilf2	2.2631e-76	0.299039	0.709	0.219	4.5038e-72	5	Ilf2
Gm42047	4.34901e-76	0.281716	0.468	0.086	8.65497e-72	5	Gm42047
Eri1	1.37236e-75	0.358601	0.744	0.271	2.73114e-71	5	Eri1
Rbbp71	7.48414e-75	0.444208	0.883	0.469	1.48942e-70	5	Rbbp7
Xpo1	1.20525e-74	0.253953	0.667	0.232	2.39856e-70	5	Xpo1
Cdk41	2.83671e-74	0.387784	0.837	0.412	5.64534e-70	5	Cdk4
Calm2	4.13162e-74	0.485716	0.976	0.844	8.22233e-70	5	Calm2
Hist1h1d	9.18817e-74	0.268004	0.453	0.078	1.82854e-69	5	Hist1h1d
Arl6ip1	4.01731e-73	0.716711	0.983	0.872	7.99485e-69	5	Arl6ip1
Smc3	5.81947e-73	0.384418	0.867	0.428	1.15813e-68	5	Smc3
Hat11	7.39117e-73	0.379823	0.718	0.272	1.47092e-68	5	Hat1
Supt16	1.04653e-72	0.402025	0.86	0.418	2.08271e-68	5	Supt16
Cox5b	1.93906e-72	0.331576	0.991	0.908	3.85892e-68	5	Cox5b
Fabp51	3.2947e-72	0.504454	0.718	0.266	6.55678e-68	5	Fabp5
Slbp1	8.2853e-72	0.494821	0.851	0.475	1.64886e-67	5	Slbp
Eif4a11	3.79761e-71	0.437641	0.985	0.835	7.55762e-67	5	Eif4a1
Pa2g41	4.51077e-71	0.45107	0.88	0.496	8.97689e-67	5	Pa2g4
Set1	2.25497e-70	0.434869	0.99	0.831	4.48761e-66	5	Set
Erh1	2.56981e-70	0.411059	0.887	0.499	5.11418e-66	5	Erh
Pole3	2.5703e-70	0.26474	0.656	0.202	5.11516e-66	5	Pole3
Vars	5.90281e-70	0.293461	0.716	0.239	1.17472e-65	5	Vars
Cmtm7	6.43317e-70	0.563661	0.922	0.591	1.28027e-65	5	Cmtm7
Pbdc1	8.16887e-70	0.379278	0.814	0.329	1.62569e-65	5	Pbdc1
Uchl5	2.72803e-69	0.343984	0.77	0.302	5.42905e-65	5	Uchl5
Gm9347	5.94731e-69	0.291186	0.613	0.167	1.18357e-64	5	Gm9347
Rps27l1	1.69532e-68	0.451171	0.946	0.669	3.37386e-64	5	Rps27l
Hpf11	6.32643e-68	0.384057	0.893	0.489	1.25902e-63	5	Hpf1
Actg1	2.48868e-67	0.365826	1	0.997	4.95272e-63	5	Actg1
Sae1	5.88484e-67	0.34189	0.819	0.387	1.17114e-62	5	Sae1
Med30	1.59933e-66	0.316967	0.871	0.438	3.18283e-62	5	Med30
Calm3	1.81453e-66	0.407528	0.971	0.72	3.6111e-62	5	Calm3
Dpy301	2.29888e-66	0.342095	0.891	0.503	4.57501e-62	5	Dpy30
Rpa1	1.16452e-65	0.263721	0.641	0.221	2.3175e-61	5	Rpa1
Syce21	1.18074e-65	0.266531	0.507	0.116	2.34979e-61	5	Syce2
Tuba1a	1.99642e-65	0.326974	0.772	0.318	3.97307e-61	5	Tuba1a
Mcm61	2.53867e-65	0.366069	0.669	0.235	5.05221e-61	5	Mcm6
Baz1b	2.912e-65	0.295929	0.745	0.298	5.79517e-61	5	Baz1b
Atpif1	4.86109e-65	0.381994	0.948	0.613	9.67406e-61	5	Atpif1
Hnrnpa11	7.39654e-64	0.389181	0.98	0.772	1.47199e-59	5	Hnrnpa1
Psip1	7.47964e-64	0.324348	0.81	0.358	1.48852e-59	5	Psip1
Tuba4a	1.25576e-63	0.298929	0.695	0.242	2.49909e-59	5	Tuba4a
Trim59	1.2621e-63	0.254197	0.663	0.236	2.51171e-59	5	Trim59
Clic1	1.34854e-63	0.284496	0.998	0.958	2.68373e-59	5	Clic1
Kmt5a	1.3607e-63	0.268086	0.726	0.273	2.70792e-59	5	Kmt5a
Dnajc91	1.86391e-63	0.467908	0.922	0.579	3.70936e-59	5	Dnajc9
Lsm4	3.14629e-63	0.327263	0.932	0.61	6.26144e-59	5	Lsm4
Suz12	6.10338e-63	0.401181	0.842	0.402	1.21463e-58	5	Suz12
1500009L16Rik	1.24388e-62	0.27897	0.42	0.074	2.47544e-58	5	1500009L16Rik
Nudt21	6.22472e-62	0.363665	0.943	0.592	1.23878e-57	5	Nudt21
Commd1	1.05494e-61	0.272334	0.834	0.42	2.09944e-57	5	Commd1
Rfc1	2.88315e-61	0.288032	0.637	0.233	5.73776e-57	5	Rfc1
Serinc3	4.38191e-61	0.421157	0.949	0.635	8.72045e-57	5	Serinc3
1810037I17Rik1	1.91931e-60	0.407777	0.984	0.821	3.81962e-56	5	1810037I17Rik
Elof1	2.46533e-60	0.274985	0.826	0.398	4.90625e-56	5	Elof1
Sumo2	4.41272e-60	0.31132	0.993	0.947	8.78175e-56	5	Sumo2
Snrpb1	1.22228e-59	0.347383	0.981	0.782	2.43245e-55	5	Snrpb
Rfc21	1.67469e-59	0.3548	0.824	0.41	3.3328e-55	5	Rfc2
Sfpq	1.9954e-59	0.376449	0.909	0.557	3.97105e-55	5	Sfpq
Nxt1	4.86527e-59	0.259037	0.728	0.269	9.68237e-55	5	Nxt1
Kpnb1	1.72096e-58	0.282728	0.746	0.287	3.42489e-54	5	Kpnb1
Calm1	2.12012e-58	0.289507	1	0.971	4.21924e-54	5	Calm1
Cox7a2	2.70628e-58	0.342965	0.991	0.901	5.38577e-54	5	Cox7a2
Atp5b	4.30647e-58	0.311146	0.99	0.909	8.57031e-54	5	Atp5b
Pfdn6	6.10915e-58	0.264054	0.821	0.396	1.21578e-53	5	Pfdn6
Mthfd2	7.01752e-58	0.311944	0.749	0.308	1.39656e-53	5	Mthfd2
Ncl1	7.85595e-58	0.429161	0.985	0.828	1.56341e-53	5	Ncl
Prelid3b	1.03566e-57	0.301044	0.776	0.337	2.06107e-53	5	Prelid3b
Tceal9	1.14732e-57	0.277156	0.763	0.33	2.28329e-53	5	Tceal9
Cox5a1	1.15158e-57	0.316613	0.994	0.903	2.29177e-53	5	Cox5a
Gltp	1.44688e-57	0.309269	0.833	0.408	2.87944e-53	5	Gltp
Hspa14	2.36297e-57	0.288137	0.779	0.346	4.70254e-53	5	Hspa14
Cbfb	2.36822e-57	0.327983	0.853	0.404	4.713e-53	5	Cbfb
U2af1	3.84498e-57	0.350241	0.904	0.574	7.6519e-53	5	U2af1
Mapre1	1.376e-56	0.309783	0.933	0.621	2.73837e-52	5	Mapre1
Lsm6	3.38585e-56	0.323699	0.891	0.547	6.73819e-52	5	Lsm6
Cdkn2d	4.5627e-56	0.419974	0.771	0.4	9.08022e-52	5	Cdkn2d
Smarcc1	1.28007e-55	0.266597	0.642	0.238	2.54746e-51	5	Smarcc1
Anapc11	2.11154e-55	0.290804	0.846	0.406	4.20218e-51	5	Anapc11
Tkt1	4.03053e-55	0.360591	0.912	0.577	8.02116e-51	5	Tkt
Cep57	5.31869e-55	0.266937	0.67	0.231	1.05847e-50	5	Cep57
Snrpf1	7.69355e-55	0.35453	0.955	0.724	1.53109e-50	5	Snrpf
Ppih	2.358e-54	0.250118	0.687	0.238	4.69266e-50	5	Ppih
Nono	2.36419e-54	0.297406	0.928	0.617	4.70497e-50	5	Nono
Dazap1	2.40303e-54	0.273006	0.883	0.491	4.78227e-50	5	Dazap1
Smarca5	3.20322e-54	0.36522	0.914	0.556	6.37473e-50	5	Smarca5
Lyar	3.47391e-54	0.327994	0.777	0.382	6.91342e-50	5	Lyar
Hnrnpf	6.73219e-54	0.314558	0.995	0.928	1.33977e-49	5	Hnrnpf
Tcp1	8.99144e-54	0.338424	0.916	0.601	1.78939e-49	5	Tcp1
Nubp1	9.80479e-54	0.286198	0.826	0.4	1.95125e-49	5	Nubp1
Nudt5	1.86553e-53	0.293068	0.779	0.363	3.71259e-49	5	Nudt5
Ctcf	2.33553e-53	0.321083	0.872	0.503	4.64794e-49	5	Ctcf
Ldha1	4.36092e-53	0.403784	0.995	0.911	8.67866e-49	5	Ldha
Maz	1.17093e-51	0.304062	0.819	0.362	2.33026e-47	5	Maz
Ndufc2	1.31379e-51	0.283527	0.931	0.637	2.61457e-47	5	Ndufc2
Prdx11	1.5101e-51	0.367358	0.978	0.829	3.00524e-47	5	Prdx1
Oxct1	4.38574e-51	0.314704	0.853	0.44	8.72805e-47	5	Oxct1
Rbbp4	5.21512e-51	0.373218	0.885	0.582	1.03786e-46	5	Rbbp4
Ndufa41	8.78891e-51	0.33797	0.977	0.859	1.74908e-46	5	Ndufa4
G3bp11	9.1738e-51	0.346732	0.92	0.61	1.82568e-46	5	G3bp1
Atp5o	1.02272e-50	0.285125	0.978	0.817	2.03531e-46	5	Atp5o
Hmgn1	1.84085e-50	0.311134	0.643	0.272	3.66347e-46	5	Hmgn1
Dbi1	3.69812e-50	0.314111	0.948	0.665	7.35962e-46	5	Dbi
Pdia61	3.76024e-50	0.354691	0.92	0.63	7.48325e-46	5	Pdia6
Nsmce1	5.04817e-49	0.257329	0.709	0.28	1.00464e-44	5	Nsmce1
Hp1bp3	1.33776e-48	0.332561	0.855	0.453	2.66227e-44	5	Hp1bp3
Uba2	1.47958e-48	0.291107	0.821	0.42	2.94452e-44	5	Uba2
Nop581	4.30143e-48	0.295809	0.816	0.422	8.56027e-44	5	Nop58
Ywhae	7.39964e-48	0.323477	0.949	0.71	1.4726e-43	5	Ywhae
Ddx39b	1.3828e-47	0.329366	0.945	0.604	2.75192e-43	5	Ddx39b
Magoh	2.87638e-47	0.309412	0.927	0.632	5.72428e-43	5	Magoh
Atp5f11	4.11051e-47	0.270649	0.985	0.876	8.18033e-43	5	Atp5f1
Manf	8.20892e-47	0.309609	0.966	0.722	1.63366e-42	5	Manf
Sec11c	1.79022e-46	0.347731	0.97	0.749	3.56272e-42	5	Sec11c
Psmb21	2.28311e-46	0.293742	0.952	0.683	4.54361e-42	5	Psmb2
Psma41	4.76853e-46	0.305104	0.971	0.761	9.48986e-42	5	Psma4
Cisd11	7.77254e-46	0.279923	0.746	0.36	1.54681e-41	5	Cisd1
Bex3	8.21905e-46	0.286781	0.802	0.377	1.63567e-41	5	Bex3
Ywhab	8.29146e-46	0.270669	0.942	0.659	1.65008e-41	5	Ywhab
Atp5j	8.43638e-46	0.266633	0.991	0.879	1.67892e-41	5	Atp5j
Nudc	8.69302e-46	0.299762	0.874	0.52	1.73e-41	5	Nudc
Raly	1.92087e-45	0.27165	0.968	0.727	3.82273e-41	5	Raly
Tpm4	1.99388e-45	0.276346	0.918	0.568	3.96803e-41	5	Tpm4
Actn4	2.68383e-45	0.263934	0.882	0.532	5.34109e-41	5	Actn4
Txnl1	3.52365e-45	0.295207	0.919	0.613	7.01241e-41	5	Txnl1
Ssb	4.30932e-45	0.284164	0.964	0.745	8.57598e-41	5	Ssb
Tfrc1	1.44815e-44	0.294481	0.685	0.309	2.88196e-40	5	Tfrc
Serbp1	4.19634e-44	0.26306	0.995	0.949	8.35115e-40	5	Serbp1
Mpp6	1.55952e-43	0.263518	0.695	0.279	3.10359e-39	5	Mpp6
Sf3b5	1.78993e-43	0.263483	0.931	0.667	3.56215e-39	5	Sf3b5
Snrpa11	3.15209e-43	0.287007	0.845	0.444	6.27298e-39	5	Snrpa1
Dnajc2	6.52168e-43	0.277035	0.867	0.511	1.29788e-38	5	Dnajc2
Eif1ax1	2.4295e-42	0.289917	0.895	0.594	4.83494e-38	5	Eif1ax
Hprt1	2.63433e-42	0.286839	0.928	0.676	5.24257e-38	5	Hprt
Vdac1	1.28722e-41	0.2657	0.832	0.469	2.56169e-37	5	Vdac1
Eloc	2.38535e-41	0.252885	0.948	0.705	4.74709e-37	5	Eloc
Ptges3	3.01943e-41	0.290709	0.887	0.52	6.00897e-37	5	Ptges3
Pcbp2	3.22722e-41	0.25832	0.973	0.836	6.42249e-37	5	Pcbp2
Rps171	7.34255e-41	0.250154	0.993	0.962	1.46124e-36	5	Rps17
Actb1	1.52675e-40	0.267419	1	1	3.03838e-36	5	Actb
Mdh1	2.02108e-40	0.266769	0.954	0.764	4.02214e-36	5	Mdh1
Cdk2ap1	2.44009e-40	0.267557	0.804	0.411	4.85602e-36	5	Cdk2ap1
Mrpl51	3.18289e-40	0.255771	0.809	0.417	6.33427e-36	5	Mrpl51
Ddost	3.68564e-40	0.255468	0.906	0.585	7.3348e-36	5	Ddost
Paics1	5.31772e-40	0.272527	0.76	0.399	1.05828e-35	5	Paics
Hnrnpd	5.95294e-40	0.315984	0.952	0.721	1.1847e-35	5	Hnrnpd
Mt11	1.42171e-39	0.321113	0.457	0.198	2.82935e-35	5	Mt1
Prmt11	1.49342e-39	0.282222	0.849	0.512	2.97206e-35	5	Prmt1
Vdac3	1.73588e-39	0.263799	0.885	0.546	3.45458e-35	5	Vdac3
Atp5g3	2.73794e-39	0.262274	0.972	0.77	5.44877e-35	5	Atp5g3
2020-09-07	6.01631e-39	0.257716	0.981	0.802	1.19731e-34	5	2020-09-07
Psmb6	1.04188e-38	0.261631	0.941	0.681	2.07345e-34	5	Psmb6
1700097N02Rik	2.84059e-38	0.326227	0.708	0.344	5.65306e-34	5	1700097N02Rik
Cox6a11	4.55101e-38	0.252586	0.968	0.758	9.05696e-34	5	Cox6a1
Gspt1	6.9669e-38	0.26104	0.773	0.403	1.38648e-33	5	Gspt1
Cenpx	1.15402e-37	0.280906	0.902	0.554	2.29662e-33	5	Cenpx
Eif5a1	1.16864e-37	0.301894	0.992	0.924	2.32571e-33	5	Eif5a
Ptbp1	1.92781e-37	0.252854	0.844	0.463	3.83653e-33	5	Ptbp1
Snrpc	7.31455e-37	0.261358	0.866	0.496	1.45567e-32	5	Snrpc
Nhp21	1.51427e-36	0.263406	0.814	0.471	3.01354e-32	5	Nhp2
Snu131	2.40847e-36	0.278647	0.913	0.655	4.7931e-32	5	Snu13
Lgals11	4.71146e-36	0.279666	0.996	0.967	9.37628e-32	5	Lgals1
Pdap1	6.26917e-36	0.287659	0.858	0.52	1.24763e-31	5	Pdap1
Canx	7.69453e-36	0.295161	0.926	0.599	1.53129e-31	5	Canx
Cycs1	8.08237e-34	0.301126	0.955	0.75	1.60847e-29	5	Cycs
Nrgn2	8.11499e-34	0.29928	0.822	0.516	1.61496e-29	5	Nrgn
Psmd13	2.90965e-32	0.268648	0.901	0.544	5.7905e-28	5	Psmd13
Smc6	4.20841e-31	0.259996	0.925	0.664	8.37516e-27	5	Smc6
Pgk12	8.61291e-30	0.260185	0.986	0.847	1.71406e-25	5	Pgk1
Tpi12	1.36072e-28	0.302352	0.947	0.721	2.70796e-24	5	Tpi1
Nme11	3.48257e-27	0.268844	0.951	0.763	6.93065e-23	5	Nme1
Npm11	6.78194e-20	0.252673	0.999	0.969	1.34967e-15	5	Npm1
Gzmb3	3.88408e-16	0.296322	0.858	0.666	7.72971e-12	5	Gzmb
Srgn1	8.27476e-91	0.870914	0.991	0.989	1.64676e-86	6	Srgn
Gadd45b1	8.10653e-90	1.36017	0.812	0.334	1.61328e-85	6	Gadd45b
Ccl4	9.20099e-90	2.87031	0.895	0.62	1.83109e-85	6	Ccl4
Ccl31	3.12564e-89	2.59156	0.79	0.408	6.22034e-85	6	Ccl3
Eif4a12	5.24486e-81	0.733769	0.987	0.845	1.04378e-76	6	Eif4a1
Ifng	1.05281e-73	2.63114	0.829	0.576	2.0952e-69	6	Ifng
Xcl1	5.75907e-70	2.45798	0.672	0.296	1.14611e-65	6	Xcl1
Crtam	1.12072e-69	1.22968	0.648	0.253	2.23034e-65	6	Crtam
Hsp90ab1	5.11563e-66	0.521323	1	0.988	1.01806e-61	6	Hsp90ab1
Map2k3	3.3438e-64	0.733129	0.77	0.428	6.6545e-60	6	Map2k3
Fbl1	3.46775e-61	0.704957	0.818	0.513	6.90116e-57	6	Fbl
Eif5a2	5.72244e-60	0.671647	0.989	0.929	1.13882e-55	6	Eif5a
Npm12	7.3807e-60	0.794404	0.989	0.971	1.46883e-55	6	Npm1
Ncl2	2.38687e-58	0.850088	0.974	0.839	4.75011e-54	6	Ncl
Ddx21	1.38423e-57	0.760488	0.79	0.48	2.75477e-53	6	Ddx21
Kdm6b	3.98204e-56	0.813823	0.602	0.208	7.92467e-52	6	Kdm6b
Tnfsf14	1.93849e-55	0.568078	0.403	0.073	3.8578e-51	6	Tnfsf14
Nr4a3	1.36133e-54	0.953558	0.661	0.26	2.70919e-50	6	Nr4a3
C1qbp1	1.97589e-54	0.7165	0.79	0.528	3.93222e-50	6	C1qbp
Cnbp	6.67289e-53	0.519504	0.974	0.924	1.32797e-48	6	Cnbp
Utf1	2.47297e-52	0.554297	0.396	0.078	4.92146e-48	6	Utf1
Hspa9	2.74233e-51	0.559144	0.689	0.369	5.4575e-47	6	Hspa9
Ehd11	4.14022e-51	0.627148	0.731	0.417	8.23946e-47	6	Ehd1
Zbtb321	4.73684e-51	0.748678	0.67	0.368	9.42678e-47	6	Zbtb32
Erdr1	5.04739e-50	0.67515	0.838	0.592	1.00448e-45	6	Erdr1
Mif1	3.11029e-49	0.68916	0.941	0.86	6.1898e-45	6	Mif
Hspd1	1.19649e-48	0.672809	0.884	0.7	2.38113e-44	6	Hspd1
Rel1	1.54613e-48	0.797402	0.729	0.429	3.07694e-44	6	Rel
Rgcc	1.58138e-46	0.654573	0.383	0.084	3.1471e-42	6	Rgcc
Cycs2	2.25577e-46	0.518363	0.912	0.766	4.48921e-42	6	Cycs
Nr4a1	2.79381e-46	0.794578	0.65	0.297	5.55996e-42	6	Nr4a1
Hnrnpdl	7.09939e-45	0.534955	0.821	0.592	1.41285e-40	6	Hnrnpdl
Nfkbib	1.04315e-44	0.646869	0.678	0.377	2.07598e-40	6	Nfkbib
Nop582	1.09196e-44	0.676219	0.746	0.452	2.17312e-40	6	Nop58
Nhp22	3.06225e-44	0.619769	0.757	0.497	6.09419e-40	6	Nhp2
Eef1e1	6.14649e-44	0.628101	0.661	0.355	1.22321e-39	6	Eef1e1
Ccl1	2.69231e-43	2.31559	0.389	0.119	5.35797e-39	6	Ccl1
Hspe1	1.23769e-42	0.559359	0.947	0.889	2.46312e-38	6	Hspe1
Srm	7.1503e-42	0.630164	0.49	0.171	1.42298e-37	6	Srm
Mrto4	3.63811e-41	0.559832	0.626	0.329	7.2402e-37	6	Mrto4
Tagap	1.42871e-40	0.556821	0.534	0.228	2.84328e-36	6	Tagap
Gtpbp4	1.44816e-40	0.56368	0.676	0.416	2.88198e-36	6	Gtpbp4
Ppan	1.5975e-40	0.531352	0.44	0.152	3.17919e-36	6	Ppan
Rps21	1.49697e-39	0.452417	1	0.99	2.97912e-35	6	Rps2
Ppp1r14b1	6.04642e-39	0.641494	0.722	0.504	1.2033e-34	6	Ppp1r14b
Rilpl2	6.52849e-39	0.631437	0.718	0.472	1.29923e-34	6	Rilpl2
Eif2s2	8.31815e-39	0.529466	0.904	0.767	1.65539e-34	6	Eif2s2
Crabp2	5.55914e-38	1.0742	0.315	0.062	1.10632e-33	6	Crabp2
Hccs	4.40106e-36	0.495982	0.571	0.283	8.75855e-32	6	Hccs
Atp5b1	1.79737e-35	0.385973	0.972	0.915	3.57695e-31	6	Atp5b
M6pr	5.51272e-35	0.487203	0.711	0.455	1.09709e-30	6	M6pr
Bcl2a1d1	9.54193e-35	0.571811	0.873	0.713	1.89894e-30	6	Bcl2a1d
Cct5	1.55148e-34	0.447692	0.853	0.726	3.0876e-30	6	Cct5
Lyar1	1.649e-34	0.500392	0.676	0.414	3.28167e-30	6	Lyar
Cct6a1	4.29539e-34	0.552852	0.748	0.57	8.54825e-30	6	Cct6a
Cct8	4.57505e-34	0.502905	0.858	0.708	9.10481e-30	6	Cct8
Cct31	7.34077e-34	0.4709	0.77	0.537	1.46089e-29	6	Cct3
Gch1	1.07338e-33	0.557613	0.534	0.265	2.13614e-29	6	Gch1
Snhg1	1.63952e-33	0.515518	0.786	0.546	3.2628e-29	6	Snhg1
Bcl2a1b1	2.13362e-33	0.547256	0.919	0.813	4.24613e-29	6	Bcl2a1b
Eif4e	2.82105e-33	0.461454	0.722	0.492	5.61416e-29	6	Eif4e
Ebna1bp2	3.34591e-33	0.511039	0.698	0.474	6.65869e-29	6	Ebna1bp2
Rps25	1.28837e-32	0.280486	0.996	0.985	2.56399e-28	6	Rps25
Eea1	2.14797e-32	0.580678	0.593	0.347	4.27467e-28	6	Eea1
Serbp11	2.87656e-32	0.409458	0.987	0.952	5.72463e-28	6	Serbp1
Cct2	7.97988e-32	0.425577	0.912	0.795	1.58808e-27	6	Cct2
Ptma2	1.32499e-31	0.362144	1	0.995	2.63687e-27	6	Ptma
Etf1	1.57659e-31	0.466824	0.683	0.44	3.13758e-27	6	Etf1
Pfdn2	2.12813e-31	0.381104	0.805	0.64	4.23519e-27	6	Pfdn2
Hnrnpa12	2.3163e-31	0.434598	0.912	0.79	4.60967e-27	6	Hnrnpa1
Wdr43	1.75384e-30	0.487093	0.597	0.355	3.49032e-26	6	Wdr43
Cd40lg	2.76646e-30	0.478612	0.212	0.041	5.50554e-26	6	Cd40lg
Nolc1	3.42472e-30	0.551487	0.549	0.284	6.81554e-26	6	Nolc1
Eef1g	4.32341e-30	0.399569	0.95	0.906	8.60401e-26	6	Eef1g
Nop561	6.84199e-30	0.55862	0.639	0.387	1.36162e-25	6	Nop56
Eif5b	1.25747e-29	0.473886	0.781	0.615	2.50248e-25	6	Eif5b
Snrpf2	1.27314e-29	0.413925	0.897	0.743	2.53367e-25	6	Snrpf
Pa2g42	1.90464e-29	0.545339	0.74	0.53	3.79041e-25	6	Pa2g4
Gnl3	2.7868e-29	0.504135	0.449	0.194	5.54601e-25	6	Gnl3
Nop16	3.35774e-29	0.36321	0.368	0.143	6.68225e-25	6	Nop16
Nfkbid	5.33441e-29	0.894795	0.361	0.127	1.0616e-24	6	Nfkbid
Top1	6.0171e-29	0.447016	0.812	0.644	1.19746e-24	6	Top1
Magoh1	6.69157e-29	0.366893	0.799	0.659	1.33169e-24	6	Magoh
Dot1l	6.98664e-29	0.383997	0.409	0.155	1.39041e-24	6	Dot1l
Hspa5	7.62689e-29	0.472858	0.961	0.898	1.51783e-24	6	Hspa5
Ybx12	1.54916e-28	0.342223	0.98	0.944	3.08299e-24	6	Ybx1
Il2ra	2.15517e-28	0.533885	0.516	0.258	4.289e-24	6	Il2ra
Ppa1	2.65558e-28	0.459369	0.652	0.436	5.28487e-24	6	Ppa1
Mettl1	6.87261e-28	0.348264	0.365	0.128	1.36772e-23	6	Mettl1
Ran2	7.39359e-28	0.421962	0.956	0.867	1.4714e-23	6	Ran
Sema7a	9.84603e-28	0.352484	0.291	0.076	1.95946e-23	6	Sema7a
Gpr65	1.07652e-27	0.436124	0.628	0.379	2.14237e-23	6	Gpr65
Orai11	1.697e-27	0.462578	0.761	0.552	3.37721e-23	6	Orai1
Ranbp12	2.21937e-27	0.450031	0.871	0.699	4.41678e-23	6	Ranbp1
Timm17a	3.60182e-27	0.370454	0.689	0.512	7.16797e-23	6	Timm17a
Rrp15	4.21789e-27	0.395505	0.438	0.202	8.39402e-23	6	Rrp15
Mir155hg	5.48816e-27	0.531947	0.451	0.207	1.0922e-22	6	Mir155hg
Eif1ax2	1.14724e-26	0.423295	0.792	0.62	2.28312e-22	6	Eif1ax
Rrp9	1.67561e-26	0.39348	0.379	0.153	3.33463e-22	6	Rrp9
Cd1601	1.9163e-26	0.70972	0.646	0.448	3.81363e-22	6	Cd160
Pim12	1.99374e-26	0.744778	0.7	0.48	3.96773e-22	6	Pim1
Snrpa12	2.36869e-26	0.420445	0.67	0.48	4.71394e-22	6	Snrpa1
Havcr21	4.64955e-26	0.556342	0.615	0.35	9.25308e-22	6	Havcr2
Mybbp1a	1.32661e-25	0.386781	0.451	0.222	2.64009e-21	6	Mybbp1a
Gar11	3.54251e-25	0.420888	0.551	0.338	7.04995e-21	6	Gar1
Ppp2ca	5.89393e-25	0.322768	0.867	0.733	1.17295e-20	6	Ppp2ca
Ruvbl1	6.45059e-25	0.385464	0.527	0.299	1.28373e-20	6	Ruvbl1
Pno1	6.85097e-25	0.375141	0.499	0.254	1.36341e-20	6	Pno1
Snrpd3	7.02017e-25	0.350661	0.768	0.599	1.39708e-20	6	Snrpd3
Rsl1d11	8.60444e-25	0.423297	0.772	0.589	1.71237e-20	6	Rsl1d1
Prelid21	1.33783e-24	0.448306	0.648	0.463	2.66241e-20	6	Prelid2
Nme12	1.64541e-24	0.414435	0.902	0.779	3.27452e-20	6	Nme1
Tomm20	1.86915e-24	0.379197	0.919	0.843	3.71979e-20	6	Tomm20
Cd83	1.92532e-24	0.525102	0.214	0.042	3.83158e-20	6	Cd83
Odc1	1.95539e-24	0.498822	0.635	0.393	3.89141e-20	6	Odc1
Cacybp	2.18625e-24	0.386677	0.814	0.681	4.35086e-20	6	Cacybp
Serpinb6b1	3.98504e-24	0.935864	0.691	0.538	7.93062e-20	6	Serpinb6b
Gfod1	5.01865e-24	0.379527	0.405	0.18	9.98761e-20	6	Gfod1
Eif2s11	6.03309e-24	0.424415	0.77	0.591	1.20065e-19	6	Eif2s1
Spry12	7.6955e-24	0.543517	0.457	0.225	1.53148e-19	6	Spry1
1110038B12Rik	1.25477e-23	0.493347	0.573	0.371	2.49713e-19	6	1110038B12Rik
Stx111	1.68103e-23	0.460188	0.53	0.286	3.34542e-19	6	Stx11
Set2	1.71161e-23	0.436111	0.928	0.845	3.40628e-19	6	Set
Sla	2.08677e-23	0.456915	0.731	0.536	4.15289e-19	6	Sla
Timm8a1	4.80714e-23	0.377963	0.422	0.2	9.56669e-19	6	Timm8a1
Pus7	7.02419e-23	0.266188	0.258	0.081	1.39788e-18	6	Pus7
Perp	7.52138e-23	0.287308	0.217	0.058	1.49683e-18	6	Perp
Uqcrq	9.05779e-23	0.318544	0.899	0.853	1.80259e-18	6	Uqcrq
Sytl31	1.19158e-22	0.495696	0.54	0.31	2.37136e-18	6	Sytl3
Furin	1.50902e-22	0.612073	0.403	0.184	3.0031e-18	6	Furin
Tomm40	1.53937e-22	0.399319	0.565	0.35	3.06349e-18	6	Tomm40
Ndfip11	1.69193e-22	0.35869	0.869	0.75	3.3671e-18	6	Ndfip1
Snu132	1.73067e-22	0.427587	0.805	0.678	3.4442e-18	6	Snu13
Strap	2.13682e-22	0.398934	0.729	0.553	4.25248e-18	6	Strap
Dad1	2.83934e-22	0.302138	0.915	0.853	5.65058e-18	6	Dad1
Rps172	3.34893e-22	0.273936	0.976	0.965	6.6647e-18	6	Rps17
Nfkbia1	3.62181e-22	0.664058	0.856	0.669	7.20776e-18	6	Nfkbia
Zeb21	4.77307e-22	0.361478	0.446	0.226	9.49889e-18	6	Zeb2
Ppid	5.13388e-22	0.359604	0.505	0.301	1.02169e-17	6	Ppid
Srsf72	6.23835e-22	0.415005	0.775	0.554	1.2415e-17	6	Srsf7
U2af11	8.7705e-22	0.341459	0.772	0.603	1.74542e-17	6	U2af1
Nfkb1	1.0617e-21	0.458786	0.65	0.456	2.11289e-17	6	Nfkb1
Psme2	1.30523e-21	0.411082	0.917	0.878	2.59754e-17	6	Psme2
Hivep3	1.33865e-21	0.518544	0.4	0.175	2.66404e-17	6	Hivep3
Tcp11	1.51726e-21	0.34751	0.79	0.629	3.0195e-17	6	Tcp1
Tnfrsf92	8.21511e-21	0.395193	0.902	0.741	1.63489e-16	6	Tnfrsf9
Mrps28	9.5048e-21	0.329109	0.499	0.285	1.89155e-16	6	Mrps28
Snhg12	1.03713e-20	0.426068	0.481	0.272	2.06399e-16	6	Snhg12
Tfrc2	1.15807e-20	0.386848	0.556	0.341	2.30467e-16	6	Tfrc
Hspa8	1.3443e-20	0.300094	0.996	0.983	2.67528e-16	6	Hspa8
Ctps	2.08809e-20	0.276009	0.315	0.128	4.1555e-16	6	Ctps
Srsf22	2.22976e-20	0.380917	0.882	0.726	4.43744e-16	6	Srsf2
Tma16	2.58108e-20	0.291814	0.324	0.138	5.13661e-16	6	Tma16
Ltv1	2.58453e-20	0.311517	0.403	0.209	5.14347e-16	6	Ltv1
Usmg5	3.29374e-20	0.28953	0.912	0.831	6.55488e-16	6	Usmg5
Hnrnpab2	8.44804e-20	0.352284	0.829	0.654	1.68124e-15	6	Hnrnpab
Prmt12	9.89406e-20	0.436524	0.689	0.543	1.96902e-15	6	Prmt1
Ybx3	1.30383e-19	0.363526	0.893	0.816	2.59476e-15	6	Ybx3
Csf2	2.26879e-19	1.44519	0.188	0.052	4.51512e-15	6	Csf2
Atad3a	2.33852e-19	0.301396	0.293	0.11	4.65389e-15	6	Atad3a
Pdia62	4.27841e-19	0.39053	0.792	0.656	8.51446e-15	6	Pdia6
Pou2f21	6.13582e-19	0.499699	0.499	0.278	1.22109e-14	6	Pou2f2
Emc6	9.57084e-19	0.387544	0.691	0.507	1.90469e-14	6	Emc6
Pdcd5	1.5743e-18	0.301782	0.77	0.649	3.13302e-14	6	Pdcd5
Phb21	2.08393e-18	0.362844	0.814	0.69	4.14724e-14	6	Phb2
Ptges31	2.99385e-18	0.35371	0.755	0.552	5.95805e-14	6	Ptges3
Atp5g11	3.17646e-18	0.283551	0.84	0.749	6.32148e-14	6	Atp5g1
Rpl7l1	4.69882e-18	0.302073	0.527	0.355	9.35113e-14	6	Rpl7l1
Taf10	5.16754e-18	0.286063	0.921	0.821	1.02839e-13	6	Taf10
Uck2	5.86486e-18	0.268417	0.348	0.179	1.16717e-13	6	Uck2
Apex1	6.21148e-18	0.334709	0.37	0.19	1.23615e-13	6	Apex1
Lap3	8.69084e-18	0.312862	0.363	0.187	1.72956e-13	6	Lap3
Calr	9.32985e-18	0.343694	0.941	0.885	1.85673e-13	6	Calr
Psma3	9.37915e-18	0.260691	0.882	0.816	1.86655e-13	6	Psma3
Tomm5	1.02424e-17	0.443156	0.737	0.634	2.03834e-13	6	Tomm5
Psmc5	1.10239e-17	0.313417	0.718	0.569	2.19387e-13	6	Psmc5
Myc	1.30364e-17	0.407143	0.348	0.182	2.59437e-13	6	Myc
Rrs1	1.96181e-17	0.336442	0.4	0.203	3.90419e-13	6	Rrs1
Cflar	2.01564e-17	0.377399	0.567	0.359	4.01132e-13	6	Cflar
Denr	2.04108e-17	0.293909	0.735	0.604	4.06195e-13	6	Denr
Taf1d	2.35527e-17	0.387599	0.678	0.533	4.68722e-13	6	Taf1d
Hsp90aa11	2.57627e-17	0.253952	0.963	0.887	5.12703e-13	6	Hsp90aa1
Psma6	2.84194e-17	0.266378	0.753	0.636	5.65575e-13	6	Psma6
Psmd11	2.86307e-17	0.314811	0.722	0.581	5.6978e-13	6	Psmd11
Sar1a	3.08542e-17	0.302459	0.722	0.546	6.14029e-13	6	Sar1a
Cox7b	3.60955e-17	0.269299	0.937	0.899	7.18336e-13	6	Cox7b
Fhl21	3.66807e-17	0.443854	0.503	0.319	7.29982e-13	6	Fhl2
Zfp593	3.98449e-17	0.300084	0.449	0.257	7.92953e-13	6	Zfp593
Wdr75	5.42396e-17	0.297233	0.379	0.178	1.07942e-12	6	Wdr75
Brix1	7.41043e-17	0.318268	0.492	0.308	1.47475e-12	6	Brix1
Timm10	8.02185e-17	0.321849	0.379	0.189	1.59643e-12	6	Timm10
Psma7	8.03624e-17	0.25095	0.941	0.879	1.59929e-12	6	Psma7
Mak16	9.02156e-17	0.320138	0.481	0.297	1.79538e-12	6	Mak16
Lta	9.22329e-17	0.419961	0.315	0.139	1.83553e-12	6	Lta
Wdr12	9.44694e-17	0.281973	0.335	0.168	1.88004e-12	6	Wdr12
Naa50	9.83387e-17	0.316931	0.606	0.424	1.95704e-12	6	Naa50
Nip7	1.08127e-16	0.288583	0.532	0.324	2.15183e-12	6	Nip7
Yrdc	1.2384e-16	0.258864	0.416	0.236	2.46454e-12	6	Yrdc
Hnrnpa0	1.60024e-16	0.296887	0.95	0.883	3.18464e-12	6	Hnrnpa0
Esf1	1.63121e-16	0.267373	0.497	0.323	3.24627e-12	6	Esf1
Psmb7	1.66186e-16	0.261422	0.685	0.561	3.30727e-12	6	Psmb7
Nsun2	2.18372e-16	0.338174	0.47	0.307	4.34582e-12	6	Nsun2
Mrps18b	2.83508e-16	0.270589	0.363	0.198	5.6421e-12	6	Mrps18b
Gramd1b	3.50809e-16	0.285094	0.387	0.192	6.98146e-12	6	Gramd1b
Pdap11	3.74425e-16	0.295591	0.689	0.552	7.45143e-12	6	Pdap1
Polr2k	4.22785e-16	0.285516	0.768	0.647	8.41384e-12	6	Polr2k
Pum3	4.30206e-16	0.267828	0.427	0.264	8.56154e-12	6	Pum3
Polr1c	5.52116e-16	0.269664	0.425	0.236	1.09877e-11	6	Polr1c
Pfdn4	5.82162e-16	0.311437	0.582	0.408	1.15856e-11	6	Pfdn4
Eif6	7.36516e-16	0.275753	0.694	0.567	1.46574e-11	6	Eif6
Irf82	8.27882e-16	0.428663	0.842	0.674	1.64757e-11	6	Irf8
Tnf	8.44677e-16	0.656752	0.387	0.205	1.68099e-11	6	Tnf
Vsir	9.69086e-16	0.368208	0.575	0.385	1.92858e-11	6	Vsir
Selenos	1.12032e-15	0.306291	0.731	0.606	2.22954e-11	6	Selenos
Cd91	1.15604e-15	0.40731	0.422	0.243	2.30065e-11	6	Cd9
Utp18	1.55828e-15	0.292746	0.409	0.229	3.10113e-11	6	Utp18
Rbm8a	1.72608e-15	0.305105	0.744	0.617	3.43508e-11	6	Rbm8a
Mphosph10	1.87567e-15	0.328323	0.481	0.286	3.73277e-11	6	Mphosph10
St13	2.07343e-15	0.322786	0.799	0.693	4.12633e-11	6	St13
Cct7	2.08975e-15	0.303202	0.812	0.724	4.15882e-11	6	Cct7
Eif3g	2.81149e-15	0.298086	0.676	0.558	5.59514e-11	6	Eif3g
Tnip3	2.92749e-15	0.258419	0.232	0.094	5.82599e-11	6	Tnip3
Pin1	3.30778e-15	0.255511	0.578	0.427	6.58281e-11	6	Pin1
Pebp1	3.53182e-15	0.310947	0.838	0.77	7.02868e-11	6	Pebp1
Hmgn11	4.09826e-15	0.405427	0.512	0.304	8.15594e-11	6	Hmgn1
Lmna	4.68507e-15	0.317442	0.304	0.149	9.32376e-11	6	Lmna
Serpinb91	4.74539e-15	0.570573	0.643	0.507	9.44381e-11	6	Serpinb9
Rcl1	5.12146e-15	0.26996	0.263	0.119	1.01922e-10	6	Rcl1
Slamf71	8.15137e-15	0.2842	0.383	0.209	1.6222e-10	6	Slamf7
Cebpz	9.45501e-15	0.290464	0.538	0.376	1.88164e-10	6	Cebpz
Rgs161	1.06882e-14	0.424732	0.832	0.676	2.12707e-10	6	Rgs16
Ccnd21	1.15543e-14	0.370387	0.805	0.718	2.29942e-10	6	Ccnd2
Rbpj1	1.35801e-14	0.326022	0.827	0.684	2.70257e-10	6	Rbpj
Snrpd12	1.90298e-14	0.284159	0.799	0.636	3.78712e-10	6	Snrpd1
Ube2a	1.95927e-14	0.298912	0.751	0.617	3.89913e-10	6	Ube2a
Timm13	1.97905e-14	0.257276	0.768	0.663	3.9385e-10	6	Timm13
Snrpd2	2.15046e-14	0.269781	0.853	0.787	4.27963e-10	6	Snrpd2
Fkbp4	2.23334e-14	0.280549	0.6	0.445	4.44457e-10	6	Fkbp4
Nars	2.52464e-14	0.371962	0.545	0.38	5.02429e-10	6	Nars
Snrpb2	3.14068e-14	0.264699	0.902	0.8	6.25027e-10	6	Snrpb
Kras	5.25641e-14	0.330439	0.722	0.618	1.04608e-09	6	Kras
Larp1	5.34543e-14	0.358235	0.545	0.364	1.06379e-09	6	Larp1
Fubp1	6.29711e-14	0.308126	0.748	0.617	1.25319e-09	6	Fubp1
AI662270	7.58563e-14	0.28148	0.768	0.644	1.50962e-09	6	AI662270
Ddx18	9.47769e-14	0.312693	0.525	0.368	1.88615e-09	6	Ddx18
Phb1	1.27437e-13	0.340623	0.569	0.418	2.53613e-09	6	Phb
Gm43430	1.37961e-13	0.328554	0.319	0.16	2.74557e-09	6	Gm43430
Ndufb6	1.66428e-13	0.260473	0.731	0.619	3.31209e-09	6	Ndufb6
Il2	1.9576e-13	2.32417	0.16	0.042	3.89582e-09	6	Il2
Ccl9	2.62054e-13	0.737486	0.103	0.016	5.21513e-09	6	Ccl9
Jarid2	2.90515e-13	0.363666	0.595	0.444	5.78154e-09	6	Jarid2
Irf4	3.32019e-13	0.30551	0.446	0.274	6.60751e-09	6	Irf4
Ndufaf4	3.78899e-13	0.315045	0.365	0.208	7.54046e-09	6	Ndufaf4
Atf4	4.55803e-13	0.254942	0.74	0.602	9.07093e-09	6	Atf4
Cd21	4.95121e-13	0.363054	0.864	0.811	9.85341e-09	6	Cd2
Eif5	5.63191e-13	0.275171	0.829	0.71	1.12081e-08	6	Eif5
Eif3j1	6.18482e-13	0.264824	0.435	0.281	1.23084e-08	6	Eif3j1
Mdh2	7.84009e-13	0.265624	0.856	0.793	1.56026e-08	6	Mdh2
Atp1a1	8.34283e-13	0.307315	0.676	0.527	1.66031e-08	6	Atp1a1
Eif3c	1.01089e-12	0.272185	0.827	0.716	2.01177e-08	6	Eif3c
Arf6	1.20987e-12	0.266875	0.724	0.57	2.40776e-08	6	Arf6
Lcp2	1.23901e-12	0.26236	0.661	0.54	2.46576e-08	6	Lcp2
Eif3b	1.33612e-12	0.277395	0.589	0.413	2.659e-08	6	Eif3b
Mrpl121	1.43217e-12	0.275855	0.604	0.471	2.85016e-08	6	Mrpl12
Noc2l	1.64529e-12	0.294548	0.392	0.216	3.27429e-08	6	Noc2l
Zc3h15	1.86464e-12	0.302061	0.748	0.64	3.71082e-08	6	Zc3h15
Ssb1	1.92848e-12	0.250945	0.86	0.766	3.83787e-08	6	Ssb
Ier51	2.01704e-12	0.349396	0.735	0.616	4.01412e-08	6	Ier5
Ece11	2.33932e-12	0.310653	0.499	0.32	4.65548e-08	6	Ece1
Egr3	2.74905e-12	0.544589	0.186	0.081	5.47088e-08	6	Egr3
Nfkbiz	2.77777e-12	0.356374	0.565	0.368	5.52803e-08	6	Nfkbiz
Cdv3	3.13424e-12	0.367644	0.624	0.489	6.23744e-08	6	Cdv3
Plcxd2	4.25807e-12	0.26297	0.35	0.183	8.47399e-08	6	Plcxd2
Polr2l1	5.36173e-12	0.281495	0.667	0.572	1.06704e-07	6	Polr2l
Dkc1	6.78906e-12	0.335112	0.433	0.28	1.35109e-07	6	Dkc1
Gm45716	8.85972e-12	0.300984	0.477	0.334	1.76317e-07	6	Gm45716
Psmd1	8.92081e-12	0.28701	0.551	0.406	1.77533e-07	6	Psmd1
Ddx391	1.49636e-11	0.287778	0.597	0.444	2.9779e-07	6	Ddx39
Slc1a5	1.66748e-11	0.254382	0.468	0.316	3.31845e-07	6	Slc1a5
Cd2001	2.11227e-11	0.41363	0.497	0.374	4.20363e-07	6	Cd200
Rpf2	2.45506e-11	0.285351	0.361	0.218	4.88582e-07	6	Rpf2
Rabggtb	2.57406e-11	0.317454	0.519	0.343	5.12264e-07	6	Rabggtb
Vapa	3.26622e-11	0.255889	0.759	0.649	6.5001e-07	6	Vapa
Pop5	4.02258e-11	0.256653	0.656	0.546	8.00533e-07	6	Pop5
Erh2	4.99576e-11	0.282455	0.652	0.537	9.94207e-07	6	Erh
Impdh22	8.44705e-11	0.282907	0.505	0.369	1.68105e-06	6	Impdh2
Syncrip	1.04837e-10	0.335982	0.654	0.513	2.08636e-06	6	Syncrip
Mrps6	1.08611e-10	0.282431	0.534	0.403	2.16146e-06	6	Mrps6
Slc25a52	1.10981e-10	0.263449	0.947	0.895	2.20862e-06	6	Slc25a5
Psme3	1.29258e-10	0.256448	0.422	0.281	2.57237e-06	6	Psme3
Slfn21	1.50043e-10	0.297813	0.805	0.734	2.986e-06	6	Slfn2
Dnajc21	1.55261e-10	0.259216	0.656	0.545	3.08985e-06	6	Dnajc2
Twistnb	1.75099e-10	0.25038	0.468	0.357	3.48464e-06	6	Twistnb
Slc7a1	1.77123e-10	0.284781	0.313	0.148	3.52492e-06	6	Slc7a1
Larp4	2.02659e-10	0.254175	0.374	0.225	4.03312e-06	6	Larp4
Banf12	6.00448e-10	0.276878	0.694	0.553	1.19495e-05	6	Banf1
Jaml	7.29245e-10	0.460457	0.729	0.696	1.45127e-05	6	Jaml
Tnfsf11	7.99702e-10	0.404872	0.267	0.145	1.59149e-05	6	Tnfsf11
D030056L22Rik	8.42463e-10	0.273374	0.348	0.196	1.67659e-05	6	D030056L22Rik
Lsm7	8.56264e-10	0.270049	0.525	0.389	1.70405e-05	6	Lsm7
G3bp12	9.94844e-10	0.291463	0.755	0.639	1.97984e-05	6	G3bp1
Hspa4	1.22062e-09	0.283993	0.617	0.501	2.42915e-05	6	Hspa4
Snhg3	1.55732e-09	0.317374	0.446	0.307	3.09922e-05	6	Snhg3
Bzw2	1.59512e-09	0.29026	0.446	0.3	3.17445e-05	6	Bzw2
Traf1	2.02516e-09	0.279766	0.556	0.451	4.03027e-05	6	Traf1
Adora2a	2.11638e-09	0.25214	0.365	0.221	4.2118e-05	6	Adora2a
Serp1	2.74492e-09	0.267996	0.654	0.551	5.46267e-05	6	Serp1
Tgif1	3.16573e-09	0.274679	0.403	0.249	6.30011e-05	6	Tgif1
Slamf1	3.87664e-09	0.300534	0.324	0.189	7.71491e-05	6	Slamf1
Dusp51	4.53925e-09	0.379586	0.674	0.535	9.03356e-05	6	Dusp5
Tnfsf9	4.84958e-09	0.396952	0.249	0.127	9.65115e-05	6	Tnfsf9
Kif152	5.67023e-09	0.27447	0.4	0.271	0.000112843	6	Kif15
Nop10	7.70509e-09	0.271026	0.766	0.72	0.000153339	6	Nop10
Stat5a	9.81302e-09	0.259743	0.28	0.145	0.000195289	6	Stat5a
St6galnac4	1.4679e-08	0.256164	0.381	0.252	0.000292126	6	St6galnac4
Rcc2	2.11763e-08	0.254433	0.449	0.331	0.00042143	6	Rcc2
Eif1a	4.59745e-08	0.266034	0.468	0.355	0.000914939	6	Eif1a
Plek	5.15946e-08	0.3005	0.575	0.455	0.00102678	6	Plek
Tnfsf8	5.90204e-08	0.376735	0.177	0.084	0.00117456	6	Tnfsf8
Ddx27	7.10268e-08	0.264953	0.438	0.32	0.0014135	6	Ddx27
2020-09-11	1.05878e-07	0.255866	0.591	0.472	0.00210708	6	2020-09-11
Alcam2	1.60259e-07	0.28489	0.525	0.395	0.00318931	6	Alcam
Ubald2	3.30485e-07	0.375054	0.656	0.559	0.00657699	6	Ubald2
Mapkapk2	7.46419e-07	0.267566	0.571	0.473	0.0148545	6	Mapkapk2
Hdgf1	9.96942e-07	0.272255	0.7	0.585	0.0198401	6	Hdgf
Ramp3	6.1807e-06	0.257669	0.175	0.092	0.123002	6	Ramp3
Cdkn1a1	1.16833e-05	0.262385	0.199	0.122	0.232509	6	Cdkn1a
Tnfrsf42	2.49941e-05	0.389755	0.488	0.418	0.497408	6	Tnfrsf4
Hilpda2	2.97011e-05	0.289868	0.661	0.53	0.591082	6	Hilpda
Ier31	0.000237337	0.326736	0.484	0.39	1	6	Ier3
Nr4a21	0.000501083	0.294921	0.707	0.595	1	6	Nr4a2
Rgs1	0.000581595	0.423977	0.775	0.743	1	6	Rgs1
Dusp21	0.00119594	0.266737	0.786	0.748	1	6	Dusp2
Ifit3	1.74382e-202	2.04422	0.879	0.056	3.47037e-198	7	Ifit3
Ifit1	1.68996e-192	2.03595	0.838	0.062	3.36319e-188	7	Ifit1
Isg15	3.40633e-181	2.40769	0.951	0.232	6.77894e-177	7	Isg15
Ifi2031	7.3912e-135	1.60506	0.981	0.694	1.47092e-130	7	Ifi203
Slfn11	4.35817e-131	1.4937	0.899	0.307	8.67319e-127	7	Slfn1
Slfn5	7.71537e-130	1.82289	0.701	0.082	1.53543e-125	7	Slfn5
Rtp41	2.2366e-127	1.37915	0.811	0.163	4.45106e-123	7	Rtp4
Ifit3b	6.5991e-124	1.26962	0.545	0.016	1.31329e-119	7	Ifit3b
Usp18	3.55581e-121	1.20948	0.638	0.086	7.07643e-117	7	Usp18
Zbp11	1.27556e-112	1.35157	0.921	0.54	2.53848e-108	7	Zbp1
Mndal1	1.62666e-111	1.39723	0.942	0.68	3.23721e-107	7	Mndal
Ifi2091	2.26771e-110	1.428	0.822	0.279	4.51297e-106	7	Ifi209
Rsad2	4.72653e-108	1.44668	0.474	0.011	9.40627e-104	7	Rsad2
Samhd11	1.20525e-107	1.65602	0.893	0.452	2.39857e-103	7	Samhd1
Trim30a	8.22326e-102	1.26152	0.827	0.359	1.63651e-97	7	Trim30a
Ifi2141	7.98764e-98	1.27847	0.69	0.178	1.58962e-93	7	Ifi214
Mx1	3.08195e-95	1.31577	0.534	0.062	6.13338e-91	7	Mx1
Bst21	6.16742e-95	1.42653	0.879	0.524	1.22738e-90	7	Bst2
Irf71	6.94764e-89	1.14284	0.688	0.172	1.38265e-84	7	Irf7
Gbp7	4.0517e-86	1.20364	0.871	0.581	8.06329e-82	7	Gbp7
Ifi206	4.5804e-83	0.917817	0.49	0.056	9.11546e-79	7	Ifi206
Phf11b	1.57377e-82	1.26442	0.808	0.478	3.13195e-78	7	Phf11b
Igtp1	4.51249e-82	1.15173	0.858	0.49	8.98031e-78	7	Igtp
Gm89951	1.16045e-81	1.14918	0.97	0.829	2.30942e-77	7	Gm8995
Mx2	1.00207e-80	0.802221	0.37	0.015	1.99421e-76	7	Mx2
Isg201	1.5687e-80	1.33617	0.74	0.321	3.12188e-76	7	Isg20
Xaf11	5.97806e-78	1.02021	0.715	0.288	1.18969e-73	7	Xaf1
Ifit2	5.85228e-77	1.12205	0.466	0.07	1.16466e-72	7	Ifit2
Ifi202b	1.16349e-76	1.0005	0.414	0.032	2.31546e-72	7	Ifi202b
AC151730.1	1.71839e-76	0.797944	0.384	0.018	3.41976e-72	7	AC151730.1
Ifi471	4.71212e-75	1.10712	0.866	0.596	9.3776e-71	7	Ifi47
Sp1001	1.4097e-74	0.89742	0.923	0.763	2.80543e-70	7	Sp100
Gbp2b	4.47431e-74	1.26369	0.641	0.197	8.90432e-70	7	Gbp2b
Shisa5	3.66247e-73	0.671934	0.989	0.962	7.28868e-69	7	Shisa5
Samd9l1	1.26337e-70	1.10024	0.723	0.315	2.51423e-66	7	Samd9l
9930111J21Rik2	1.42652e-70	1.08257	0.786	0.469	2.83892e-66	7	9930111J21Rik2
Stat1	1.3848e-69	1.00084	0.893	0.682	2.75589e-65	7	Stat1
Gm122501	5.30851e-69	1.05741	0.627	0.206	1.05645e-64	7	Gm12250
Parp14	8.35628e-69	1.04304	0.693	0.304	1.66298e-64	7	Parp14
Ifi27l2a1	1.61781e-68	1.54503	0.888	0.72	3.2196e-64	7	Ifi27l2a
Iigp1	8.76788e-68	1.26513	0.466	0.072	1.7449e-63	7	Iigp1
Ifi2081	4.00607e-66	0.932921	0.534	0.113	7.97247e-62	7	Ifi208
Cmpk2	6.13178e-63	0.76345	0.312	0.014	1.22029e-58	7	Cmpk2
Ddx60	1.99525e-62	0.92553	0.455	0.073	3.97075e-58	7	Ddx60
Gbp21	1.21838e-61	1.11162	0.625	0.219	2.4247e-57	7	Gbp2
Gbp41	4.81028e-60	1.05195	0.822	0.637	9.57295e-56	7	Gbp4
Ifih1	2.51046e-59	0.804023	0.419	0.077	4.99607e-55	7	Ifih1
Slfn8	4.98084e-59	0.956818	0.586	0.199	9.91237e-55	7	Slfn8
Ms4a4b1	1.01916e-58	0.675057	0.997	0.983	2.02824e-54	7	Ms4a4b
Ms4a6b1	2.95204e-57	0.611284	0.986	0.966	5.87486e-53	7	Ms4a6b
Oas3	4.92554e-57	0.790818	0.425	0.066	9.80232e-53	7	Oas3
Malat11	7.46722e-55	0.567305	1	1	1.48605e-50	7	Malat1
Daxx	7.60758e-55	0.97236	0.553	0.182	1.51398e-50	7	Daxx
Gbp9	1.43327e-54	0.917502	0.592	0.249	2.85234e-50	7	Gbp9
Phf11c	2.01674e-54	0.765074	0.405	0.055	4.01351e-50	7	Phf11c
Slfn22	5.87727e-50	0.899276	0.885	0.732	1.16964e-45	7	Slfn2
Rnf213	1.68969e-49	0.898522	0.526	0.176	3.36265e-45	7	Rnf213
Trafd1	8.26365e-49	0.83975	0.559	0.235	1.64455e-44	7	Trafd1
Irgm11	8.07307e-48	0.826459	0.597	0.273	1.60662e-43	7	Irgm1
Rps271	2.27742e-45	0.394904	0.997	0.999	4.53229e-41	7	Rps27
Ifit1bl1	6.45782e-45	0.608638	0.268	0.015	1.28517e-40	7	Ifit1bl1
Dhx58	1.32187e-44	0.612056	0.345	0.064	2.63066e-40	7	Dhx58
Ddx58	5.13501e-44	0.737479	0.471	0.166	1.02192e-39	7	Ddx58
Parp9	8.6806e-44	0.746049	0.556	0.253	1.72753e-39	7	Parp9
Gm20559	2.17217e-43	0.662439	0.43	0.141	4.32284e-39	7	Gm20559
Ifi35	2.28792e-41	0.760281	0.63	0.378	4.5532e-37	7	Ifi35
Stat2	2.52794e-41	0.697188	0.384	0.098	5.03086e-37	7	Stat2
Selenow	3.61297e-41	0.497783	0.94	0.91	7.19016e-37	7	Selenow
Epsti11	3.90588e-38	0.734481	0.778	0.66	7.77308e-34	7	Epsti1
H2-T22	7.99768e-38	0.601261	0.863	0.796	1.59162e-33	7	H2-T22
Tor3a	1.46783e-36	0.629401	0.37	0.111	2.92113e-32	7	Tor3a
Tspo	1.51478e-36	0.481128	0.934	0.913	3.01457e-32	7	Tspo
H2-T231	4.21363e-36	0.54191	0.926	0.9	8.38554e-32	7	H2-T23
Smchd1	4.97069e-36	0.823105	0.707	0.485	9.89216e-32	7	Smchd1
Eif2ak2	8.34059e-32	0.695293	0.351	0.111	1.65986e-27	7	Eif2ak2
Mitd1	6.91588e-31	0.680628	0.548	0.322	1.37633e-26	7	Mitd1
Sp1101	2.54697e-30	0.646937	0.721	0.62	5.06873e-26	7	Sp110
AW011738	6.97542e-30	0.376368	0.214	0.032	1.38818e-25	7	AW011738
Chmp4b	3.66347e-29	0.650018	0.789	0.756	7.29068e-25	7	Chmp4b
Parp12	2.29873e-28	0.391639	0.203	0.029	4.5747e-24	7	Parp12
Psmb10	3.0216e-28	0.634116	0.77	0.687	6.01328e-24	7	Psmb10
Trim30c	3.41773e-28	0.427589	0.137	0.002	6.80162e-24	7	Trim30c
Gm38050	5.18219e-28	0.300134	0.14	0.007	1.03131e-23	7	Gm38050
Oas2	6.39987e-28	0.290599	0.121	0.002	1.27364e-23	7	Oas2
Tgtp1	6.53102e-28	0.296986	0.167	0.016	1.29974e-23	7	Tgtp1
Cxcl10	1.94885e-27	1.54028	0.2	0.031	3.8784e-23	7	Cxcl10
Pml	2.71509e-27	0.624193	0.403	0.166	5.40331e-23	7	Pml
Klf21	1.00059e-26	1.15414	0.592	0.31	1.99127e-22	7	Klf2
Zufsp	1.07672e-26	0.65124	0.422	0.204	2.14279e-22	7	Zufsp
Tapbp	1.20537e-26	0.626585	0.745	0.678	2.3988e-22	7	Tapbp
Helz2	1.34511e-26	0.509869	0.34	0.113	2.67691e-22	7	Helz2
Nmi	1.50663e-25	0.642086	0.619	0.455	2.99834e-21	7	Nmi
Gm47591	7.03822e-25	0.762389	0.619	0.455	1.40068e-20	7	Gm4759
Phf11a	1.30095e-24	0.598121	0.304	0.095	2.58903e-20	7	Phf11a
Ube2l6	9.73467e-24	0.701532	0.288	0.098	1.9373e-19	7	Ube2l6
Tcf71	1.55065e-23	0.604671	0.373	0.126	3.08595e-19	7	Tcf7
Ccnd22	2.43161e-23	0.509514	0.803	0.719	4.83915e-19	7	Ccnd2
Lgals3bp	6.17973e-23	0.585195	0.523	0.328	1.22983e-18	7	Lgals3bp
Npc21	1.16411e-22	0.515415	0.844	0.84	2.3167e-18	7	Npc2
Tmsb10	1.31859e-22	0.32376	1	0.998	2.62413e-18	7	Tmsb10
Maf1	1.69576e-22	0.738704	0.293	0.094	3.37473e-18	7	Maf
Emb1	3.12535e-22	0.738896	0.581	0.323	6.21976e-18	7	Emb
Tor1aip1	5.11127e-22	0.538107	0.559	0.41	1.01719e-17	7	Tor1aip1
Herc6	5.55392e-22	0.590118	0.359	0.142	1.10529e-17	7	Herc6
Zcchc111	5.59311e-22	0.615747	0.679	0.542	1.11308e-17	7	Zcchc11
BC147527	9.10803e-22	0.407854	0.23	0.056	1.81259e-17	7	BC147527
Gbp5	2.94623e-21	0.548955	0.342	0.14	5.86328e-17	7	Gbp5
Cnp	4.07575e-21	0.581966	0.578	0.446	8.11116e-17	7	Cnp
Oas1a	1.12781e-20	0.40166	0.214	0.044	2.24446e-16	7	Oas1a
Ifi211	1.1814e-20	0.442026	0.236	0.067	2.3511e-16	7	Ifi211
Ctss	1.29143e-20	0.561016	0.532	0.369	2.57008e-16	7	Ctss
Fyb1	1.29644e-20	0.455845	0.833	0.827	2.58004e-16	7	Fyb
Ddx24	2.47976e-20	0.524266	0.688	0.65	4.93496e-16	7	Ddx24
Ifi44	3.70468e-20	0.596882	0.123	0.008	7.37269e-16	7	Ifi44
Slco3a11	4.02663e-20	0.546972	0.356	0.15	8.01339e-16	7	Slco3a1
1600014C10Rik	7.93568e-20	0.537795	0.392	0.202	1.57928e-15	7	1600014C10Rik
Psme1	8.07757e-20	0.367123	0.926	0.939	1.60752e-15	7	Psme1
Lgals9	1.37398e-19	0.560425	0.444	0.261	2.73436e-15	7	Lgals9
Gm42418	1.82886e-19	0.306529	1	0.995	3.63962e-15	7	Gm42418
Tgtp2	1.86958e-19	0.392125	0.249	0.069	3.72066e-15	7	Tgtp2
Gbp8	3.36805e-19	0.592151	0.438	0.257	6.70275e-15	7	Gbp8
Sell	3.48506e-19	0.536126	0.186	0.044	6.93563e-15	7	Sell
Asb13	3.81611e-19	0.441018	0.31	0.144	7.59444e-15	7	Asb13
Tmem140	4.46493e-19	0.368387	0.211	0.067	8.88567e-15	7	Tmem140
Rapgef6	5.00244e-19	0.469662	0.685	0.625	9.95536e-15	7	Rapgef6
Ifi204	5.49503e-19	0.573437	0.329	0.126	1.09357e-14	7	Ifi204
Cd274	1.29643e-18	0.607594	0.488	0.32	2.58002e-14	7	Cd274
Cxcr31	2.20935e-18	0.583875	0.458	0.214	4.39682e-14	7	Cxcr3
Etnk1	4.03794e-18	0.588614	0.447	0.27	8.03591e-14	7	Etnk1
Bcl11b1	8.87798e-18	0.508944	0.658	0.522	1.76681e-13	7	Bcl11b
Cd691	1.01044e-17	0.972285	0.545	0.379	2.01088e-13	7	Cd69
Rps27rt	3.02324e-17	0.388442	0.879	0.899	6.01656e-13	7	Rps27rt
Psmb8	4.78397e-17	0.281435	0.975	0.972	9.52059e-13	7	Psmb8
Gimap31	6.06091e-17	0.420416	0.838	0.847	1.20618e-12	7	Gimap3
Gbp3	6.15583e-17	0.560313	0.447	0.301	1.22507e-12	7	Gbp3
Gramd31	6.63858e-17	0.538986	0.592	0.413	1.32114e-12	7	Gramd3
Gimap61	1.16249e-16	0.492558	0.756	0.704	2.31347e-12	7	Gimap6
H2-Q41	1.87614e-16	0.444273	0.759	0.747	3.7337e-12	7	H2-Q4
Usp25	2.41989e-16	0.558273	0.551	0.453	4.81583e-12	7	Usp25
Dtx3l	9.17666e-16	0.400267	0.247	0.085	1.82625e-11	7	Dtx3l
Irf2	1.22834e-15	0.547783	0.622	0.56	2.44452e-11	7	Irf2
Cd47	1.33962e-15	0.311872	0.923	0.926	2.66598e-11	7	Cd47
Itm2b	1.38472e-15	0.266294	0.964	0.962	2.75573e-11	7	Itm2b
Irf9	1.39171e-15	0.47847	0.447	0.294	2.76963e-11	7	Irf9
S1pr11	1.83207e-15	0.403583	0.23	0.066	3.64601e-11	7	S1pr1
Socs3	7.33425e-15	0.656203	0.285	0.137	1.45959e-10	7	Socs3
Zc3hav1	9.26811e-15	0.456636	0.666	0.592	1.84445e-10	7	Zc3hav1
Cd4	4.06517e-14	0.4563	0.175	0.042	8.09009e-10	7	Cd4
Mcl11	4.25039e-14	0.438026	0.827	0.844	8.4587e-10	7	Mcl1
Gimap41	5.6424e-14	0.352525	0.847	0.845	1.12289e-09	7	Gimap4
Mxd1	8.252e-14	0.658516	0.381	0.226	1.64223e-09	7	Mxd1
2810474O19Rik	1.36797e-13	0.587096	0.575	0.491	2.72239e-09	7	2810474O19Rik
Ly6c21	1.50948e-13	0.878672	0.605	0.459	3.00401e-09	7	Ly6c2
Trim12c	1.55426e-13	0.486318	0.452	0.308	3.09314e-09	7	Trim12c
Parp11	2.30073e-13	0.287744	0.175	0.066	4.57869e-09	7	Parp11
Irgm2	4.59194e-13	0.3569	0.205	0.074	9.13843e-09	7	Irgm2
Ly6a2	1.03809e-12	0.887941	0.578	0.46	2.0659e-08	7	Ly6a
Ncoa7	1.25461e-12	0.528281	0.408	0.283	2.4968e-08	7	Ncoa7
Arl4c1	1.45944e-12	0.495398	0.537	0.393	2.90442e-08	7	Arl4c
Adar	1.49018e-12	0.351974	0.263	0.145	2.9656e-08	7	Adar
Tmbim6	1.66477e-12	0.277514	0.849	0.877	3.31305e-08	7	Tmbim6
Ddx5	1.92802e-12	0.257339	0.953	0.976	3.83696e-08	7	Ddx5
Prrc2c	2.27892e-12	0.375057	0.775	0.789	4.53528e-08	7	Prrc2c
Trim21	2.31732e-12	0.333022	0.222	0.083	4.6117e-08	7	Trim21
Oas1b	4.16961e-12	0.261122	0.151	0.037	8.29794e-08	7	Oas1b
Trim25	4.65042e-12	0.338253	0.222	0.101	9.25481e-08	7	Trim25
Ssh21	4.71333e-12	0.485865	0.356	0.182	9.38001e-08	7	Ssh2
Parp10	5.74447e-12	0.398431	0.271	0.128	1.14321e-07	7	Parp10
Evl	7.33928e-12	0.404423	0.605	0.559	1.46059e-07	7	Evl
Cd22	9.4768e-12	0.318168	0.852	0.812	1.88598e-07	7	Cd2
Ly6c11	1.47528e-11	0.703659	0.537	0.376	2.93595e-07	7	Ly6c1
Nsd31	1.91432e-11	0.445092	0.674	0.688	3.80969e-07	7	Nsd3
Il18bp	2.57532e-11	0.253364	0.126	0.038	5.12515e-07	7	Il18bp
Trim56	3.94261e-11	0.371127	0.34	0.191	7.84618e-07	7	Trim56
Herc3	4.39653e-11	0.330794	0.238	0.124	8.74953e-07	7	Herc3
Ltb2	5.08295e-11	0.337659	0.934	0.931	1.01156e-06	7	Ltb
Tap1	9.21946e-11	0.328869	0.696	0.733	1.83476e-06	7	Tap1
Cd40lg1	9.50843e-11	0.387616	0.151	0.045	1.89227e-06	7	Cd40lg
Lgals8	1.2139e-10	0.308484	0.255	0.157	2.41578e-06	7	Lgals8
mt-Rnr21	1.28114e-10	0.277624	1	1	2.54959e-06	7	mt-Rnr2
Ifngr11	1.39027e-10	0.396473	0.803	0.8	2.76677e-06	7	Ifngr1
Casp4	1.79372e-10	0.38289	0.279	0.152	3.56969e-06	7	Casp4
Crim1	1.96011e-10	0.294447	0.186	0.08	3.90082e-06	7	Crim1
Arhgap451	2.50476e-10	0.301519	0.729	0.75	4.98473e-06	7	Arhgap45
Ascc3	2.77397e-10	0.392184	0.4	0.309	5.52048e-06	7	Ascc3
Socs1	2.90162e-10	0.572862	0.466	0.39	5.77451e-06	7	Socs1
Irf11	6.88056e-10	0.456436	0.515	0.434	1.3693e-05	7	Irf1
Sidt1	7.21075e-10	0.313359	0.238	0.118	1.43501e-05	7	Sidt1
Uba7	9.00211e-10	0.344987	0.214	0.105	1.79151e-05	7	Uba7
Ogfr	9.53091e-10	0.41929	0.436	0.37	1.89675e-05	7	Ogfr
Klf31	9.70997e-10	0.345814	0.184	0.06	1.93238e-05	7	Klf3
Ablim11	1.35478e-09	0.327892	0.726	0.755	2.69614e-05	7	Ablim1
Rnf114	1.41798e-09	0.423601	0.471	0.408	2.82192e-05	7	Rnf114
Itgb71	1.91042e-09	0.480375	0.452	0.274	3.80193e-05	7	Itgb7
Hspa1b1	1.91904e-09	0.575695	0.742	0.645	3.81907e-05	7	Hspa1b
Stk17b1	2.32043e-09	0.267673	0.868	0.903	4.61789e-05	7	Stk17b
Tnp2	2.5283e-09	0.29969	0.145	0.055	5.03157e-05	7	Tnp2
Clec2d1	2.74381e-09	0.440839	0.69	0.655	5.46046e-05	7	Clec2d
Trp53inp11	3.46642e-09	0.380373	0.299	0.175	6.89853e-05	7	Trp53inp1
Gm43302	3.60278e-09	0.395329	0.356	0.241	7.16989e-05	7	Gm43302
Gna131	4.62488e-09	0.430028	0.608	0.57	9.20398e-05	7	Gna13
Celf2	4.9299e-09	0.372852	0.737	0.778	9.811e-05	7	Celf2
Abcb1a1	7.40153e-09	0.346814	0.236	0.124	0.000147298	7	Abcb1a
Inpp1	1.0966e-08	0.379665	0.356	0.245	0.000218235	7	Inpp1
Gimap91	1.21439e-08	0.404729	0.518	0.481	0.000241676	7	Gimap9
Cd532	1.3922e-08	0.251339	0.899	0.924	0.000277062	7	Cd53
Fam111a	1.6606e-08	0.419679	0.315	0.227	0.000330475	7	Fam111a
9130208D14Rik	2.63867e-08	0.25077	0.164	0.071	0.000525121	7	9130208D14Rik
Ralgps2	3.28862e-08	0.291976	0.137	0.05	0.000654467	7	Ralgps2
Casp8	3.94149e-08	0.40127	0.468	0.431	0.000784396	7	Casp8
Mov10	4.90722e-08	0.307291	0.181	0.078	0.000976586	7	Mov10
Slamf61	5.1102e-08	0.41197	0.288	0.149	0.00101698	7	Slamf6
Psme2b	5.40446e-08	0.324378	0.26	0.158	0.00107554	7	Psme2b
Cnot6l	5.69128e-08	0.437567	0.63	0.598	0.00113262	7	Cnot6l
Vcpip1	7.16885e-08	0.358148	0.312	0.205	0.00142667	7	Vcpip1
Casp1	9.0592e-08	0.390898	0.323	0.238	0.00180287	7	Casp1
Znfx1	9.84266e-08	0.282114	0.173	0.076	0.00195879	7	Znfx1
Crlf3	9.91607e-08	0.409602	0.515	0.504	0.0019734	7	Crlf3
Setdb2	1.13359e-07	0.296731	0.186	0.086	0.00225595	7	Setdb2
Trim26	1.36236e-07	0.305406	0.277	0.197	0.00271124	7	Trim26
Dgka1	2.10704e-07	0.424354	0.419	0.336	0.00419323	7	Dgka
Tap2	2.34217e-07	0.312685	0.633	0.64	0.00466115	7	Tap2
Elf11	2.47912e-07	0.329631	0.63	0.659	0.00493369	7	Elf1
Mrpl30	2.98937e-07	0.326133	0.595	0.626	0.00594915	7	Mrpl30
C230096K16Rik1	3.14365e-07	0.294947	0.153	0.045	0.00625618	7	C230096K16Rik
Il2rg	3.47509e-07	0.28466	0.688	0.737	0.00691578	7	Il2rg
Ankrd111	3.93878e-07	0.36113	0.685	0.725	0.00783857	7	Ankrd11
Xrn21	3.96916e-07	0.334266	0.644	0.668	0.00789902	7	Xrn2
Gzma2	4.29597e-07	0.252399	0.225	0.117	0.00854941	7	Gzma
Evi2a	4.52401e-07	0.435142	0.381	0.308	0.00900323	7	Evi2a
Morc3	4.63037e-07	0.338384	0.334	0.267	0.00921491	7	Morc3
Zcchc2	5.934e-07	0.319501	0.236	0.141	0.0118093	7	Zcchc2
Tor1aip2	6.31435e-07	0.350775	0.274	0.19	0.0125662	7	Tor1aip2
Ms4a4c1	8.10307e-07	0.546011	0.4	0.297	0.0161259	7	Ms4a4c
Crbn	1.16746e-06	0.384336	0.468	0.475	0.0232337	7	Crbn
Scml4	1.25384e-06	0.263002	0.173	0.073	0.0249527	7	Scml4
Naa20	1.31686e-06	0.430247	0.449	0.434	0.0262069	7	Naa20
Zbtb20	1.36138e-06	0.374933	0.258	0.17	0.0270927	7	Zbtb20
Nampt	1.36465e-06	0.341528	0.277	0.203	0.0271578	7	Nampt
Tnfsf81	1.75042e-06	0.486779	0.17	0.086	0.0348352	7	Tnfsf8
Ctse	1.97371e-06	0.362051	0.408	0.346	0.0392789	7	Ctse
Mycbp2	1.98762e-06	0.32283	0.622	0.683	0.0395557	7	Mycbp2
Ppm1k	2.06015e-06	0.301314	0.2	0.113	0.0409991	7	Ppm1k
Fam26f	2.2488e-06	0.343775	0.258	0.167	0.0447534	7	Fam26f
Peli1	3.27409e-06	0.358124	0.644	0.688	0.0651576	7	Peli1
Gimap81	4.30101e-06	0.31286	0.466	0.443	0.0855945	7	Gimap8
Gm268251	4.54094e-06	0.448687	0.616	0.589	0.0903693	7	Gm26825
Gm44292	4.61554e-06	0.392124	0.244	0.141	0.0918539	7	Gm44292
Nt5c3	5.76285e-06	0.406903	0.351	0.309	0.114687	7	Nt5c3
Hspa1a1	6.14282e-06	0.551217	0.685	0.636	0.122248	7	Hspa1a
Zfp36l21	7.52893e-06	0.463014	0.693	0.722	0.149833	7	Zfp36l2
Ubb1	1.32619e-05	0.259526	0.997	0.996	0.263925	7	Ubb
Ptbp3	1.46808e-05	0.256569	0.715	0.795	0.292162	7	Ptbp3
Tnrc6b	1.47872e-05	0.300237	0.471	0.447	0.29428	7	Tnrc6b
Ccr21	1.77218e-05	0.425519	0.332	0.234	0.352682	7	Ccr2
Gypc	2.09763e-05	0.253112	0.195	0.121	0.417449	7	Gypc
Ehd3	2.24965e-05	0.313106	0.238	0.184	0.447703	7	Ehd3
Gdap10	2.30969e-05	0.255154	0.134	0.076	0.459651	7	Gdap10
Ppp1r12a1	3.53692e-05	0.345125	0.51	0.502	0.703883	7	Ppp1r12a
Ipcef1	5.23266e-05	0.290115	0.277	0.215	1	7	Ipcef1
Txnip1	6.98963e-05	0.306036	0.567	0.548	1	7	Txnip
Arid4b	9.3057e-05	0.278433	0.493	0.484	1	7	Arid4b
Cpne3	0.000100048	0.289066	0.26	0.176	1	7	Cpne3
Ass1	0.000109945	0.332958	0.197	0.119	1	7	Ass1
Sesn31	0.00011093	0.339698	0.403	0.359	1	7	Sesn3
Kif1b	0.000122159	0.268221	0.205	0.146	1	7	Kif1b
Phc2	0.000133389	0.286933	0.332	0.296	1	7	Phc2
Btg12	0.000176712	0.275848	0.967	0.983	1	7	Btg1
Cd164	0.000202221	0.25307	0.597	0.701	1	7	Cd164
Lilr4b1	0.000224423	0.313498	0.195	0.107	1	7	Lilr4b
Idnk	0.000276113	0.279786	0.501	0.535	1	7	Idnk
Cytip	0.000289823	0.279674	0.742	0.836	1	7	Cytip
Smpdl3a1	0.000298376	0.284712	0.414	0.383	1	7	Smpdl3a
Cmtm6	0.000300772	0.284431	0.321	0.29	1	7	Cmtm6
Ccrl2	0.00032007	0.397257	0.23	0.18	1	7	Ccrl2
Cyth1	0.000328911	0.321972	0.274	0.205	1	7	Cyth1
Sp140	0.000351097	0.334317	0.512	0.541	1	7	Sp140
Zfp36l11	0.000376165	0.273341	0.608	0.641	1	7	Zfp36l1
Sfi1	0.000420434	0.286332	0.529	0.58	1	7	Sfi1
Pcgf5	0.00052303	0.380254	0.348	0.312	1	7	Pcgf5
Tbrg1	0.000537695	0.275403	0.575	0.646	1	7	Tbrg1
Tpst21	0.000681633	0.283123	0.4	0.377	1	7	Tpst2
Fam102a	0.000709023	0.260787	0.4	0.39	1	7	Fam102a
Arhgap30	0.000738905	0.258612	0.622	0.722	1	7	Arhgap30
Chd31	0.00081928	0.300004	0.395	0.344	1	7	Chd3
Klf61	0.000870518	0.49985	0.701	0.759	1	7	Klf6
N4bp1	0.000924343	0.317639	0.299	0.258	1	7	N4bp1
Cd28	0.000961779	0.254797	0.674	0.773	1	7	Cd28
Epb41	0.00122772	0.260738	0.268	0.229	1	7	Epb41
Phyh	0.0013554	0.280617	0.414	0.432	1	7	Phyh
Ppa11	0.00141542	0.381452	0.43	0.447	1	7	Ppa1
Atp11b	0.00165782	0.288631	0.392	0.363	1	7	Atp11b
Ypel3	0.00203403	0.258489	0.518	0.513	1	7	Ypel3
Dpp4	0.00211585	0.355992	0.236	0.183	1	7	Dpp4
Ubald21	0.00218586	0.369539	0.562	0.564	1	7	Ubald2
Gpr181	0.0026197	0.338221	0.268	0.204	1	7	Gpr18
Pim13	0.00276	0.398521	0.493	0.49	1	7	Pim1
Cxcr41	0.00283984	0.311426	0.156	0.082	1	7	Cxcr4
Tsc22d31	0.00293883	0.335094	0.345	0.302	1	7	Tsc22d3
Il7r1	0.00328177	0.529335	0.51	0.513	1	7	Il7r
Rnf1381	0.00353561	0.30032	0.466	0.51	1	7	Rnf138
Gm20186	0.00393981	0.284097	0.181	0.126	1	7	Gm20186
Tle41	0.00456852	0.2545	0.334	0.299	1	7	Tle4
Prkcq	0.00479987	0.253328	0.436	0.462	1	7	Prkcq
A130071D04Rik1	0.00499122	0.303748	0.578	0.626	1	7	A130071D04Rik
Mbnl2	0.00507155	0.265898	0.356	0.331	1	7	Mbnl2
Sipa1l1	0.00516778	0.31782	0.252	0.225	1	7	Sipa1l1
Ramp31	0.00554644	0.470665	0.145	0.094	1	7	Ramp3
Commd81	0.00669375	0.295612	0.386	0.411	1	7	Commd8
Atp1b31	0.00672439	0.260719	0.551	0.635	1	7	Atp1b3
Cebpb	0.00693206	0.315145	0.307	0.293	1	7	Cebpb
Il16	0.00728499	0.25247	0.315	0.286	1	7	Il16
Lef11	0.00845957	0.319026	0.227	0.153	1	7	Lef1
Asxl2	0.00859743	0.276909	0.312	0.287	1	7	Asxl2
Pmepa1	0.00961453	0.370937	0.468	0.473	1	7	Pmepa1

## Sheet: Cluster_markers_Tregs
	p_val	avg_logFC	pct.1	pct.2	p_val_adj	cluster	gene
H2-D1	1.62571e-95	0.356398	1	1	3.23532e-91	0	H2-D1
Malat1	5.56678e-78	0.36032	1	0.998	1.10784e-73	0	Malat1
Fxyd5	2.90455e-67	0.409261	0.989	0.957	5.78034e-63	0	Fxyd5
H2-K1	1.89328e-66	0.308383	1	0.997	3.76782e-62	0	H2-K1
AW112010	7.53019e-65	0.533074	0.991	0.961	1.49858e-60	0	AW112010
Cd2	3.44267e-58	0.413606	0.978	0.94	6.85126e-54	0	Cd2
Pnrc1	2.21887e-52	0.499751	0.889	0.8	4.41577e-48	0	Pnrc1
Arl5a	1.74833e-49	0.520409	0.821	0.682	3.47935e-45	0	Arl5a
Btg1	6.78235e-46	0.412729	0.963	0.928	1.34976e-41	0	Btg1
Icos	1.20331e-44	0.482672	0.963	0.913	2.39471e-40	0	Icos
Vim	2.98436e-44	0.482499	0.973	0.882	5.93918e-40	0	Vim
Shisa5	1.45869e-41	0.320758	0.979	0.954	2.90293e-37	0	Shisa5
Gzmb	7.79233e-41	0.775692	0.821	0.639	1.55075e-36	0	Gzmb
Gimap3	1.02832e-39	0.384763	0.886	0.84	2.04646e-35	0	Gimap3
Pglyrp1	4.19212e-39	0.657773	0.736	0.618	8.34274e-35	0	Pglyrp1
Npc2	5.88184e-39	0.400811	0.892	0.858	1.17055e-34	0	Npc2
Ltb	1.03864e-37	0.4382	0.954	0.913	2.06699e-33	0	Ltb
Ifngr1	1.35755e-34	0.392864	0.897	0.831	2.70166e-30	0	Ifngr1
Cst3	2.66283e-34	0.463519	0.795	0.74	5.29929e-30	0	Cst3
Lgals3	1.30108e-33	0.636204	0.486	0.289	2.58929e-29	0	Lgals3
Maf	1.82478e-33	0.497309	0.872	0.781	3.6315e-29	0	Maf
Capg	2.52801e-31	0.299767	0.94	0.86	5.03099e-27	0	Capg
Ypel3	2.35514e-30	0.472844	0.639	0.473	4.68695e-26	0	Ypel3
Samsn1	6.32337e-30	0.429953	0.857	0.79	1.25841e-25	0	Samsn1
Tnfrsf18	7.94935e-30	0.311338	0.969	0.929	1.582e-25	0	Tnfrsf18
Ccr2	1.16248e-29	0.469511	0.822	0.685	2.31345e-25	0	Ccr2
Sat1	9.97899e-29	0.44651	0.753	0.728	1.98592e-24	0	Sat1
Gabarap	4.21368e-28	0.313533	0.86	0.837	8.38564e-24	0	Gabarap
Hif1a	1.36581e-27	0.268141	0.905	0.867	2.7181e-23	0	Hif1a
Rabac1	3.03047e-27	0.409715	0.706	0.631	6.03094e-23	0	Rabac1
Itgb7	2.0968e-26	0.308361	0.85	0.821	4.17285e-22	0	Itgb7
Cd53	2.11948e-26	0.310963	0.92	0.895	4.21798e-22	0	Cd53
Zfp36l1	2.78465e-26	0.380582	0.879	0.815	5.54174e-22	0	Zfp36l1
Il7r	7.05318e-26	0.530623	0.594	0.452	1.40365e-21	0	Il7r
Peli1	7.19088e-26	0.361649	0.786	0.727	1.43106e-21	0	Peli1
Ahnak	9.43527e-26	0.386476	0.653	0.534	1.87771e-21	0	Ahnak
Pmepa1	1.72863e-25	0.449087	0.702	0.581	3.44015e-21	0	Pmepa1
Pla2g16	3.72373e-25	0.339464	0.778	0.739	7.4106e-21	0	Pla2g16
Pim1	7.55862e-25	0.308163	0.93	0.89	1.50424e-20	0	Pim1
Srgn	2.48309e-24	0.273211	0.996	0.971	4.9416e-20	0	Srgn
H2-T22	3.80002e-24	0.342028	0.791	0.754	7.56241e-20	0	H2-T22
Zdhhc18	5.91998e-24	0.349437	0.761	0.712	1.17814e-19	0	Zdhhc18
Ecm1	1.53392e-23	0.463229	0.467	0.339	3.05265e-19	0	Ecm1
Ctla2a	6.92213e-23	0.718097	0.616	0.495	1.37757e-18	0	Ctla2a
Map1lc3b	8.77813e-23	0.28043	0.798	0.79	1.74694e-18	0	Map1lc3b
Wnk1	9.55535e-23	0.32196	0.813	0.767	1.90161e-18	0	Wnk1
Ly6a	1.26989e-22	0.394122	0.922	0.781	2.5272e-18	0	Ly6a
Gimap6	2.98636e-22	0.31913	0.814	0.772	5.94315e-18	0	Gimap6
Sdf4	1.01605e-21	0.293214	0.937	0.899	2.02204e-17	0	Sdf4
Gimap7	2.78969e-20	0.388066	0.812	0.75	5.55176e-16	0	Gimap7
Tnfrsf9	1.34847e-19	0.419029	0.927	0.812	2.68359e-15	0	Tnfrsf9
Tnfrsf4	1.57516e-19	0.274525	0.97	0.91	3.13472e-15	0	Tnfrsf4
Crip1	2.20939e-19	0.419399	0.904	0.859	4.39692e-15	0	Crip1
Izumo1r	3.13005e-19	0.399722	0.753	0.702	6.22911e-15	0	Izumo1r
Klf6	7.06657e-19	0.405636	0.746	0.68	1.40632e-14	0	Klf6
Timp2	9.83144e-19	0.422358	0.469	0.378	1.95655e-14	0	Timp2
Ccl5	1.17909e-18	0.79598	0.443	0.342	2.34652e-14	0	Ccl5
S100a13	1.27942e-18	0.312766	0.818	0.782	2.54617e-14	0	S100a13
Akap13	3.00639e-18	0.351636	0.718	0.695	5.98301e-14	0	Akap13
Il2ra	6.0276e-18	0.362059	0.767	0.656	1.19955e-13	0	Il2ra
H2-T23	6.42124e-18	0.255696	0.908	0.877	1.27789e-13	0	H2-T23
Crem	8.0032e-18	0.334196	0.713	0.665	1.59272e-13	0	Crem
Aldoa	9.8736e-18	0.364118	0.919	0.859	1.96494e-13	0	Aldoa
Smad7	1.92664e-17	0.412235	0.616	0.535	3.8342e-13	0	Smad7
Rsrp1	2.85863e-16	0.312956	0.733	0.718	5.68896e-12	0	Rsrp1
Tnfrsf1b	3.93088e-16	0.318945	0.564	0.52	7.82284e-12	0	Tnfrsf1b
N4bp1	7.03775e-16	0.364838	0.476	0.397	1.40058e-11	0	N4bp1
Cish	7.45575e-16	0.389673	0.487	0.402	1.48377e-11	0	Cish
Itgae	7.56136e-16	0.488445	0.457	0.316	1.50479e-11	0	Itgae
Anxa2	3.20754e-15	0.328991	0.678	0.582	6.38332e-11	0	Anxa2
Clec2d	6.64427e-15	0.30501	0.728	0.712	1.32228e-10	0	Clec2d
S100a6	6.74613e-15	0.390582	0.87	0.834	1.34255e-10	0	S100a6
H2-Q7	6.88135e-15	0.25053	0.899	0.858	1.36946e-10	0	H2-Q7
Jund	2.00722e-14	0.286032	0.947	0.932	3.99457e-10	0	Jund
Cast	5.75495e-14	0.336051	0.603	0.563	1.14529e-09	0	Cast
Bnip3l	9.41354e-14	0.323988	0.61	0.594	1.87339e-09	0	Bnip3l
Sdcbp2	2.07426e-13	0.387095	0.44	0.352	4.12799e-09	0	Sdcbp2
Nfil3	3.5544e-13	0.382797	0.477	0.419	7.07362e-09	0	Nfil3
Fgl2	4.25469e-13	0.416268	0.347	0.229	8.46726e-09	0	Fgl2
AC149090.1	7.61386e-13	0.307184	0.661	0.618	1.51523e-08	0	AC149090.1
Foxp3	7.68931e-13	0.28495	0.775	0.755	1.53025e-08	0	Foxp3
Pld3	8.36604e-13	0.303634	0.481	0.417	1.66493e-08	0	Pld3
Metrnl	1.01791e-12	0.420171	0.323	0.212	2.02573e-08	0	Metrnl
Dusp1	1.15469e-12	0.420396	0.633	0.595	2.29794e-08	0	Dusp1
Dusp5	1.77149e-12	0.31062	0.583	0.562	3.52543e-08	0	Dusp5
Cd200r1	1.87836e-12	0.323406	0.294	0.213	3.73813e-08	0	Cd200r1
Mxd4	3.7728e-12	0.29962	0.429	0.336	7.50824e-08	0	Mxd4
Ctss	4.71418e-12	0.379751	0.585	0.55	9.38168e-08	0	Ctss
Rapgef6	6.31061e-12	0.262125	0.597	0.586	1.25587e-07	0	Rapgef6
Ctla4	1.15654e-11	0.283828	0.9	0.888	2.30164e-07	0	Ctla4
Cebpb	1.30009e-11	0.390889	0.648	0.624	2.58731e-07	0	Cebpb
Leprotl1	1.43423e-11	0.281846	0.652	0.67	2.85427e-07	0	Leprotl1
Sdc4	1.99465e-11	0.363194	0.296	0.181	3.96956e-07	0	Sdc4
Hopx	2.97991e-11	0.355078	0.418	0.362	5.93032e-07	0	Hopx
Ccr5	1.68183e-10	0.417627	0.522	0.438	3.34701e-06	0	Ccr5
Gng2	5.22809e-10	0.31074	0.481	0.455	1.04044e-05	0	Gng2
Nfkbia	6.13095e-10	0.365912	0.857	0.821	1.22012e-05	0	Nfkbia
Ddit4	6.35423e-10	0.357676	0.619	0.561	1.26456e-05	0	Ddit4
Vmp1	8.20616e-10	0.263734	0.641	0.657	1.63311e-05	0	Vmp1
Rab11a	1.10999e-09	0.282063	0.517	0.531	2.20899e-05	0	Rab11a
Rgs1	1.69248e-09	0.384028	0.693	0.68	3.3682e-05	0	Rgs1
Neb	3.21848e-09	0.250931	0.266	0.206	6.4051e-05	0	Neb
Bnip3	4.23495e-09	0.368968	0.289	0.216	8.42798e-05	0	Bnip3
Klrg1	4.79771e-09	0.382345	0.448	0.365	9.54792e-05	0	Klrg1
Malt1	4.99629e-09	0.268992	0.41	0.326	9.94312e-05	0	Malt1
Fam46a	5.08049e-09	0.455779	0.527	0.488	0.000101107	0	Fam46a
Hilpda	5.6903e-09	0.490024	0.475	0.43	0.000113243	0	Hilpda
Pcyt1a	7.79592e-09	0.271791	0.173	0.111	0.000155147	0	Pcyt1a
Zfp292	9.90935e-09	0.317748	0.636	0.616	0.000197206	0	Zfp292
Rnase4	1.79363e-08	0.284633	0.265	0.185	0.00035695	0	Rnase4
Tsc22d3	1.99921e-08	0.337468	0.339	0.245	0.000397862	0	Tsc22d3
Id2	2.32102e-08	0.289294	0.724	0.678	0.000461907	0	Id2
Mdfic	3.56383e-08	0.335242	0.452	0.402	0.000709237	0	Mdfic
Trac	3.60168e-08	0.261059	0.659	0.665	0.00071677	0	Trac
Lag3	5.79314e-08	0.533682	0.387	0.302	0.00115289	0	Lag3
Hcst	7.27465e-08	0.254704	0.72	0.735	0.00144773	0	Hcst
Kdm5b	8.52441e-08	0.25336	0.223	0.13	0.00169644	0	Kdm5b
Fosl2	8.65135e-08	0.292642	0.391	0.313	0.0017217	0	Fosl2
Camk4	1.49617e-07	0.252171	0.562	0.548	0.00297752	0	Camk4
Tmem59	1.73099e-07	0.257178	0.567	0.573	0.00344483	0	Tmem59
Ubc	1.94936e-07	0.284963	0.638	0.634	0.00387943	0	Ubc
Socs2	2.23761e-07	0.338181	0.32	0.243	0.00445306	0	Socs2
Ptms	2.65295e-07	0.265861	0.51	0.488	0.00527963	0	Ptms
Eva1b	4.05117e-07	0.270407	0.437	0.399	0.00806222	0	Eva1b
Ndrg1	4.44616e-07	0.261322	0.281	0.235	0.0088483	0	Ndrg1
Ctsw	4.95302e-07	0.395172	0.241	0.175	0.009857	0	Ctsw
Txnip	5.39515e-07	0.333914	0.495	0.449	0.0107369	0	Txnip
Irf2	5.56432e-07	0.26144	0.493	0.488	0.0110736	0	Irf2
2410006H16Rik	6.09576e-07	0.27214	0.697	0.735	0.0121312	0	2410006H16Rik
Jun	1.10175e-06	0.334849	0.608	0.585	0.0219258	0	Jun
Wls	1.31246e-06	0.265443	0.415	0.392	0.0261193	0	Wls
Isg20	1.38241e-06	0.303457	0.513	0.489	0.0275114	0	Isg20
Ankrd12	1.88826e-06	0.284841	0.545	0.516	0.0375782	0	Ankrd12
Slc16a3	4.58892e-06	0.352658	0.307	0.266	0.091324	0	Slc16a3
Il10	6.5257e-06	0.411465	0.153	0.091	0.129868	0	Il10
Znrf1	9.51876e-06	0.292244	0.411	0.388	0.189433	0	Znrf1
Csf1	1.44161e-05	0.322797	0.191	0.136	0.286896	0	Csf1
Klf2	5.29306e-05	0.263037	0.534	0.503	1	0	Klf2
Nrip1	6.13633e-05	0.25979	0.454	0.459	1	0	Nrip1
Mxd1	0.000131186	0.253328	0.453	0.427	1	0	Mxd1
Rgs10	0.000150282	0.286585	0.515	0.484	1	0	Rgs10
Ly6c1	0.000150983	0.371491	0.179	0.158	1	0	Ly6c1
Socs1	0.000162833	0.252538	0.358	0.356	1	0	Socs1
Ikzf4	0.000187165	0.251428	0.415	0.415	1	0	Ikzf4
Ccrl2	0.000288676	0.312824	0.318	0.289	1	0	Ccrl2
Pold4	0.000359205	0.258348	0.429	0.45	1	0	Pold4
5830444F18Rik	0.000402536	0.260709	0.329	0.311	1	0	5830444F18Rik
Serpinb6a	0.000634634	0.335224	0.345	0.332	1	0	Serpinb6a
Cxcr6	0.00116104	0.290948	0.147	0.124	1	0	Cxcr6
Ormdl3	0.00160997	0.300774	0.344	0.313	1	0	Ormdl3
Ltf	0.00230905	0.379571	0.146	0.111	1	0	Ltf
Dnajb1	0.00360074	0.353771	0.49	0.547	1	0	Dnajb1
Stmn1	0	2.16188	0.969	0.099	0	1	Stmn1
Ptma	6.70665e-262	1.05294	1	0.988	1.33469e-257	1	Ptma
Pclaf	1.40823e-261	1.88383	0.858	0.06	2.80253e-257	1	Pclaf
Smc2	3.11793e-238	1.33928	0.868	0.107	6.20499e-234	1	Smc2
Birc5	1.12263e-231	1.62432	0.759	0.03	2.23415e-227	1	Birc5
Cks1b	4.56755e-230	1.12695	0.783	0.036	9.08987e-226	1	Cks1b
Tuba1b	2.80162e-229	1.74163	0.913	0.264	5.5755e-225	1	Tuba1b
Hmgb2	6.3357e-223	1.55123	0.995	0.765	1.26087e-218	1	Hmgb2
Mki67	3.83251e-219	1.60184	0.846	0.11	7.62708e-215	1	Mki67
Tubb5	4.45646e-219	1.60854	0.98	0.617	8.8688e-215	1	Tubb5
Ran	6.89001e-219	1.08516	0.992	0.705	1.37118e-214	1	Ran
Spc24	3.81317e-218	1.06836	0.741	0.018	7.58859e-214	1	Spc24
Cdca8	5.80633e-209	1.15162	0.711	0.022	1.15552e-204	1	Cdca8
Asf1b	2.23728e-207	0.900942	0.737	0.027	4.45241e-203	1	Asf1b
Hmgn2	2.87804e-207	1.26339	0.912	0.218	5.7276e-203	1	Hmgn2
Top2a	1.60581e-204	1.53754	0.803	0.104	3.19572e-200	1	Top2a
Selenoh	7.19003e-202	1.07315	0.944	0.275	1.43089e-197	1	Selenoh
Tyms	2.99645e-196	1.0614	0.759	0.073	5.96324e-192	1	Tyms
Rrm2	4.94901e-194	1.23764	0.687	0.034	9.84903e-190	1	Rrm2
H2afz	3.86604e-193	0.990891	0.997	0.87	7.69381e-189	1	H2afz
Ppia	1.12062e-189	0.661264	0.997	0.987	2.23015e-185	1	Ppia
Cdk1	2.33452e-189	1.02017	0.677	0.025	4.64593e-185	1	Cdk1
Mcm5	3.29887e-189	0.84557	0.756	0.085	6.56509e-185	1	Mcm5
Tk1	1.15596e-186	0.860603	0.697	0.035	2.30049e-182	1	Tk1
Lig1	3.85e-182	0.986613	0.826	0.13	7.66189e-178	1	Lig1
Ccnb2	2.2749e-181	1.09389	0.622	0.015	4.52727e-177	1	Ccnb2
Gmnn	2.69283e-180	0.863496	0.828	0.152	5.359e-176	1	Gmnn
Rrm1	1.21413e-178	0.774142	0.747	0.073	2.41625e-174	1	Rrm1
Ccna2	4.15317e-178	0.931596	0.609	0.011	8.26522e-174	1	Ccna2
Dut	2.44554e-177	1.11216	0.871	0.265	4.86687e-173	1	Dut
Mcm3	2.76905e-170	0.813303	0.716	0.087	5.51069e-166	1	Mcm3
Cenpw	4.52564e-170	0.681128	0.704	0.075	9.00647e-166	1	Cenpw
Tipin	3.68239e-167	0.765652	0.769	0.119	7.32833e-163	1	Tipin
Mcm7	5.42164e-166	0.756142	0.689	0.063	1.07896e-161	1	Mcm7
Anp32b	1.43258e-164	0.793424	0.982	0.718	2.85098e-160	1	Anp32b
Ybx1	2.78352e-163	0.827643	0.982	0.763	5.53949e-159	1	Ybx1
Tpx2	1.1849e-162	0.806458	0.582	0.012	2.35807e-158	1	Tpx2
Aurkb	1.6545e-162	0.744677	0.578	0.013	3.29263e-158	1	Aurkb
Rad51	6.39829e-161	0.593626	0.572	0.012	1.27332e-156	1	Rad51
Cks2	4.47966e-160	1.00821	0.852	0.241	8.91496e-156	1	Cks2
Pttg1	1.61617e-159	1.01251	0.69	0.076	3.21633e-155	1	Pttg1
Nusap1	2.48654e-159	1.1764	0.582	0.018	4.94846e-155	1	Nusap1
Ly6e	3.42282e-159	1.07396	0.925	0.4	6.81175e-155	1	Ly6e
Rfc5	5.56112e-157	0.566398	0.646	0.051	1.10672e-152	1	Rfc5
Ccdc34	8.01444e-157	0.720528	0.682	0.061	1.59495e-152	1	Ccdc34
Pmf1	7.84425e-156	0.548024	0.64	0.057	1.56108e-151	1	Pmf1
Ube2c	7.42859e-155	1.52977	0.612	0.044	1.47836e-150	1	Ube2c
Rfc4	1.07839e-154	0.613036	0.631	0.042	2.14611e-150	1	Rfc4
Cdca3	2.83418e-154	0.699759	0.553	0.011	5.64029e-150	1	Cdca3
Tacc3	1.42521e-153	0.685319	0.574	0.019	2.83631e-149	1	Tacc3
Nucks1	3.55615e-153	0.8703	0.929	0.389	7.07708e-149	1	Nucks1
Cenpm	1.34836e-151	0.524053	0.557	0.016	2.68337e-147	1	Cenpm
Hint1	2.29961e-151	0.719541	0.983	0.795	4.57645e-147	1	Hint1
Cenpf	2.51162e-151	1.10982	0.548	0.015	4.99837e-147	1	Cenpf
Lmnb1	1.19526e-150	0.88464	0.875	0.28	2.37869e-146	1	Lmnb1
Ncapg	1.35392e-150	0.624897	0.577	0.023	2.69444e-146	1	Ncapg
Fen1	2.4294e-149	0.603633	0.676	0.069	4.83475e-145	1	Fen1
Hist1h2ap	3.0081e-148	1.37016	0.594	0.052	5.98642e-144	1	Hist1h2ap
Hells	4.78217e-148	0.728899	0.666	0.086	9.51699e-144	1	Hells
Clspn	4.17212e-147	0.631435	0.583	0.032	8.30294e-143	1	Clspn
Racgap1	4.41035e-146	0.711987	0.613	0.052	8.77704e-142	1	Racgap1
Mad2l1	2.44298e-145	0.555481	0.623	0.051	4.86177e-141	1	Mad2l1
Knl1	2.61426e-145	0.726196	0.534	0.007	5.20263e-141	1	Knl1
Uhrf1	1.78054e-142	0.545402	0.574	0.032	3.54345e-138	1	Uhrf1
Alyref	6.47689e-142	0.719805	0.847	0.23	1.28896e-137	1	Alyref
Cenpe	1.20149e-141	0.759427	0.528	0.012	2.39108e-137	1	Cenpe
Cdc20	2.18045e-141	0.777851	0.534	0.021	4.33932e-137	1	Cdc20
Fbxo5	1.7827e-139	0.741444	0.53	0.014	3.54775e-135	1	Fbxo5
Pcna	4.9535e-139	0.809076	0.747	0.165	9.85797e-135	1	Pcna
Anapc5	6.97344e-139	0.594293	0.756	0.165	1.38778e-134	1	Anapc5
Knstrn	2.22265e-138	0.591602	0.551	0.03	4.42329e-134	1	Knstrn
Tubb4b	3.04226e-138	1.0407	0.781	0.243	6.0544e-134	1	Tubb4b
Hmgb1	5.58903e-137	0.773743	0.988	0.752	1.11227e-132	1	Hmgb1
Hist1h1b	1.292e-136	0.886165	0.515	0.02	2.57121e-132	1	Hist1h1b
Hist1h2ae	2.01245e-136	1.22464	0.599	0.065	4.00498e-132	1	Hist1h2ae
H2afx	9.84159e-136	1.02345	0.66	0.108	1.95857e-131	1	H2afx
Rbm3	1.4245e-135	0.540684	0.996	0.931	2.83489e-131	1	Rbm3
Prdx4	5.21106e-133	0.697746	0.855	0.239	1.03705e-128	1	Prdx4
Cenph	3.13002e-132	0.462062	0.49	0.008	6.22906e-128	1	Cenph
Impdh2	9.47714e-132	0.629038	0.741	0.146	1.88605e-127	1	Impdh2
Gins2	1.9628e-130	0.485703	0.543	0.032	3.90617e-126	1	Gins2
Dhfr	4.01806e-130	0.532308	0.561	0.039	7.99634e-126	1	Dhfr
Hat1	8.53876e-130	0.604292	0.735	0.146	1.6993e-125	1	Hat1
Ranbp1	9.58162e-130	0.888902	0.912	0.408	1.90684e-125	1	Ranbp1
Prc1	1.16965e-129	0.79733	0.577	0.049	2.32773e-125	1	Prc1
Dek	1.256e-129	0.821676	0.949	0.543	2.49957e-125	1	Dek
Lsm2	1.97373e-129	0.626566	0.815	0.188	3.92792e-125	1	Lsm2
Orc6	4.73904e-129	0.527806	0.605	0.057	9.43116e-125	1	Orc6
Cep55	7.61211e-129	0.518996	0.471	0.006	1.51489e-124	1	Cep55
Spc25	4.74634e-128	0.536157	0.482	0.008	9.44569e-124	1	Spc25
Dnmt1	1.67534e-127	0.581883	0.672	0.1	3.3341e-123	1	Dnmt1
Hmgb3	2.68246e-126	0.527937	0.667	0.091	5.33836e-122	1	Hmgb3
Rpl28	9.46134e-126	0.594267	0.996	0.946	1.8829e-121	1	Rpl28
Snrpe	3.54904e-125	0.620175	0.972	0.746	7.06295e-121	1	Snrpe
Srsf7	4.58108e-125	0.71431	0.87	0.302	9.11681e-121	1	Srsf7
Anp32e	1.32146e-124	0.697219	0.881	0.332	2.62983e-120	1	Anp32e
Ezh2	1.40148e-124	0.696785	0.832	0.262	2.78908e-120	1	Ezh2
Snrpd1	2.96245e-124	0.758077	0.905	0.375	5.89557e-120	1	Snrpd1
Nasp	5.8474e-124	0.722003	0.801	0.194	1.16369e-119	1	Nasp
Prim1	5.9947e-124	0.468254	0.532	0.039	1.193e-119	1	Prim1
Nrm	2.64504e-123	0.488602	0.578	0.058	5.26389e-119	1	Nrm
Diaph3	7.26683e-123	0.470316	0.476	0.013	1.44617e-118	1	Diaph3
Apitd1	4.4661e-122	0.425409	0.5	0.024	8.88798e-118	1	Apitd1
Sdf2l1	4.48297e-122	0.572571	0.792	0.213	8.92157e-118	1	Sdf2l1
Rpa2	1.32962e-121	0.543526	0.648	0.094	2.64607e-117	1	Rpa2
Cmc2	3.65788e-120	0.502607	0.655	0.103	7.27955e-116	1	Cmc2
Rfc3	4.14615e-120	0.509312	0.641	0.091	8.25124e-116	1	Rfc3
Hmmr	6.12433e-120	0.630815	0.443	0.004	1.2188e-115	1	Hmmr
Rad51ap1	1.73811e-119	0.448459	0.456	0.007	3.45901e-115	1	Rad51ap1
Lsm3	1.20225e-118	0.529987	0.756	0.166	2.39261e-114	1	Lsm3
Lsm5	1.85201e-118	0.667549	0.933	0.453	3.68569e-114	1	Lsm5
Phgdh	1.86892e-118	0.651453	0.794	0.216	3.71933e-114	1	Phgdh
Rnaseh2c	2.41424e-118	0.529527	0.8	0.206	4.80459e-114	1	Rnaseh2c
Banf1	1.25996e-117	0.623083	0.877	0.289	2.50744e-113	1	Banf1
Ska1	1.88103e-117	0.383461	0.44	0.006	3.74343e-113	1	Ska1
Kif11	2.59614e-117	0.623837	0.49	0.02	5.16659e-113	1	Kif11
H2afv	6.58144e-117	0.901536	0.94	0.486	1.30977e-112	1	H2afv
Srsf3	7.03702e-117	0.699597	0.965	0.634	1.40044e-112	1	Srsf3
Txn1	7.19362e-117	0.616234	0.984	0.8	1.4316e-112	1	Txn1
Chaf1a	1.13933e-116	0.395442	0.457	0.013	2.26738e-112	1	Chaf1a
Trip13	2.10527e-116	0.363221	0.44	0.007	4.18969e-112	1	Trip13
Mcm2	1.04911e-115	0.523212	0.601	0.075	2.08783e-111	1	Mcm2
Hnrnpab	1.06039e-115	0.792718	0.917	0.427	2.11028e-111	1	Hnrnpab
Nap1l1	1.08273e-115	0.666033	0.914	0.423	2.15474e-111	1	Nap1l1
Pbk	1.11166e-115	0.497987	0.434	0.005	2.21232e-111	1	Pbk
Esco2	6.569e-115	0.551414	0.429	0.004	1.3073e-110	1	Esco2
Cdc45	7.26891e-115	0.377781	0.453	0.014	1.44659e-110	1	Cdc45
Ddx39	1.06835e-114	0.621234	0.833	0.254	2.12611e-110	1	Ddx39
Nuf2	4.56107e-114	0.431382	0.422	0.004	9.07698e-110	1	Nuf2
Dlgap5	1.11615e-112	0.461184	0.447	0.013	2.22125e-108	1	Dlgap5
Rpa3	2.1899e-112	0.489626	0.743	0.169	4.35813e-108	1	Rpa3
Ccnb1	3.65722e-112	0.646871	0.451	0.014	7.27823e-108	1	Ccnb1
Topbp1	1.73978e-111	0.421614	0.575	0.088	3.46234e-107	1	Topbp1
Mcm6	1.90688e-111	0.644153	0.723	0.168	3.79488e-107	1	Mcm6
Pa2g4	3.28966e-111	0.670625	0.813	0.254	6.54675e-107	1	Pa2g4
Hist1h3c	8.45823e-111	0.47278	0.432	0.007	1.68327e-106	1	Hist1h3c
Shcbp1	2.10482e-110	0.438555	0.427	0.004	4.18881e-106	1	Shcbp1
Hnrnpa3	5.65403e-110	0.566453	0.974	0.73	1.12521e-105	1	Hnrnpa3
Fignl1	7.26716e-110	0.366076	0.433	0.012	1.44624e-105	1	Fignl1
Nme1	7.77734e-110	0.733129	0.917	0.443	1.54777e-105	1	Nme1
Incenp	1.29995e-109	0.628992	0.603	0.082	2.58703e-105	1	Incenp
Rps2	1.38625e-109	0.651915	0.989	0.92	2.75878e-105	1	Rps2
Tagln2	1.8135e-109	0.617499	0.98	0.803	3.60904e-105	1	Tagln2
Cbx5	5.81433e-109	0.459677	0.665	0.114	1.15711e-104	1	Cbx5
Rbbp7	6.49686e-109	0.631058	0.875	0.337	1.29294e-104	1	Rbbp7
Smc1a	7.91126e-109	0.599137	0.798	0.235	1.57442e-104	1	Smc1a
Hdgf	1.2471e-108	0.614806	0.887	0.333	2.48185e-104	1	Hdgf
Dtymk	2.47777e-108	0.539097	0.755	0.184	4.93102e-104	1	Dtymk
Lyar	3.95339e-108	0.488042	0.725	0.181	7.86765e-104	1	Lyar
Rps20	4.02165e-108	0.461475	1	0.981	8.00348e-104	1	Rps20
Ndc80	1.98339e-107	0.400125	0.415	0.008	3.94715e-103	1	Ndc80
Hirip3	4.33502e-107	0.421766	0.458	0.026	8.62713e-103	1	Hirip3
Tuba1c	1.3917e-106	0.697135	0.596	0.104	2.76963e-102	1	Tuba1c
Tcf19	9.27578e-106	0.387659	0.419	0.015	1.84597e-101	1	Tcf19
Ncapd3	1.22068e-105	0.493266	0.63	0.108	2.42928e-101	1	Ncapd3
Tfdp1	9.38538e-105	0.461137	0.591	0.095	1.86778e-100	1	Tfdp1
Syce2	1.93352e-104	0.37324	0.449	0.036	3.8479e-100	1	Syce2
Srsf2	4.97842e-104	0.637503	0.94	0.504	9.90755e-100	1	Srsf2
Ube2s	6.65497e-104	0.788714	0.92	0.492	1.32441e-99	1	Ube2s
Fkbp2	2.69131e-103	0.503512	0.848	0.264	5.35598e-99	1	Fkbp2
Kif22	3.86722e-103	0.411825	0.409	0.01	7.69615e-99	1	Kif22
Tmpo	3.87205e-103	0.689729	0.895	0.41	7.70577e-99	1	Tmpo
Erh	4.27034e-103	0.562764	0.853	0.292	8.49841e-99	1	Erh
Ckap2	1.42657e-102	0.423574	0.394	0.004	2.83902e-98	1	Ckap2
Ckap2l	2.45817e-102	0.451524	0.406	0.004	4.89201e-98	1	Ckap2l
Tubg1	7.6679e-102	0.32341	0.49	0.053	1.52599e-97	1	Tubg1
Rps17	8.16208e-102	0.661169	0.98	0.773	1.62434e-97	1	Rps17
Dbi	9.17988e-102	0.607933	0.909	0.413	1.82689e-97	1	Dbi
Siva1	1.09166e-101	0.555428	0.692	0.144	2.1725e-97	1	Siva1
Haus4	2.26601e-101	0.366445	0.544	0.059	4.50959e-97	1	Haus4
Sgo2a	5.52484e-101	0.425826	0.386	0.005	1.0995e-96	1	Sgo2a
Kif4	1.81572e-100	0.378347	0.382	0.004	3.61346e-96	1	Kif4
Anapc15	3.78929e-100	0.394987	0.58	0.085	7.54107e-96	1	Anapc15
Dctpp1	1.09706e-99	0.576254	0.805	0.279	2.18326e-95	1	Dctpp1
Bub1b	3.19836e-99	0.354766	0.381	0.003	6.36506e-95	1	Bub1b
Pola1	5.34388e-99	0.362547	0.461	0.038	1.06349e-94	1	Pola1
Cenpp	1.01382e-98	0.352143	0.385	0.008	2.01761e-94	1	Cenpp
Atad2	2.68218e-98	0.491389	0.671	0.138	5.33781e-94	1	Atad2
Sgo1	1.89708e-97	0.353576	0.371	0.004	3.77538e-93	1	Sgo1
Ppih	6.23311e-97	0.365416	0.646	0.132	1.24045e-92	1	Ppih
Bub1	1.55261e-96	0.377775	0.374	0.003	3.08985e-92	1	Bub1
Cdkn3	1.65914e-96	0.432935	0.376	0.008	3.30185e-92	1	Cdkn3
Cox5a	1.7309e-96	0.5237	0.97	0.724	3.44467e-92	1	Cox5a
Cdca5	1.73465e-96	0.334522	0.371	0.004	3.45214e-92	1	Cdca5
Ncapd2	3.73917e-96	0.343565	0.417	0.015	7.44133e-92	1	Ncapd2
Kif15	4.09065e-96	0.410945	0.477	0.043	8.1408e-92	1	Kif15
Mcm4	4.52844e-96	0.486423	0.643	0.123	9.01204e-92	1	Mcm4
Kif20b	7.56418e-96	0.404958	0.516	0.081	1.50535e-91	1	Kif20b
Ncaph	9.97667e-96	0.339704	0.394	0.011	1.98546e-91	1	Ncaph
Plk4	1.7283e-95	0.325257	0.461	0.045	3.43949e-91	1	Plk4
Melk	2.38497e-95	0.35038	0.403	0.017	4.74633e-91	1	Melk
Cdk4	2.52429e-95	0.515152	0.699	0.181	5.02359e-91	1	Cdk4
Gm9347	2.57376e-95	0.427574	0.64	0.122	5.12204e-91	1	Gm9347
Rpsa	2.9052e-95	0.414758	0.999	0.991	5.78164e-91	1	Rpsa
Ssrp1	4.03185e-95	0.581277	0.859	0.328	8.02378e-91	1	Ssrp1
Rangap1	5.6458e-95	0.427167	0.696	0.159	1.12357e-90	1	Rangap1
Ube2t	1.38944e-94	0.373727	0.465	0.035	2.76512e-90	1	Ube2t
Usp1	1.65268e-94	0.49488	0.731	0.192	3.289e-90	1	Usp1
Nop58	1.85653e-94	0.553072	0.743	0.212	3.69468e-90	1	Nop58
Slc25a5	3.06865e-94	0.596097	0.971	0.701	6.10691e-90	1	Slc25a5
Psat1	5.70992e-94	0.367619	0.531	0.076	1.13633e-89	1	Psat1
Rpl41	2.74275e-93	0.380749	0.997	0.995	5.45834e-89	1	Rpl41
Hist1h2bj	2.75471e-92	0.366192	0.377	0.01	5.48215e-88	1	Hist1h2bj
Lsm4	3.16461e-92	0.549437	0.911	0.397	6.29789e-88	1	Lsm4
Hmgn5	3.37326e-92	0.402372	0.653	0.154	6.71312e-88	1	Hmgn5
Pbdc1	1.74359e-91	0.418046	0.742	0.201	3.46991e-87	1	Pbdc1
Ndufa4	3.39182e-91	0.522148	0.967	0.707	6.75005e-87	1	Ndufa4
Pole3	5.26772e-91	0.301473	0.572	0.109	1.04833e-86	1	Pole3
Slbp	7.1668e-91	0.615749	0.825	0.31	1.42626e-86	1	Slbp
Mrpl18	7.28694e-91	0.542974	0.886	0.37	1.45017e-86	1	Mrpl18
Lockd	1.04099e-90	0.495067	0.563	0.104	2.07167e-86	1	Lockd
Rmi2	4.92237e-90	0.326333	0.425	0.037	9.79602e-86	1	Rmi2
Dbf4	9.80082e-90	0.399249	0.529	0.081	1.95046e-85	1	Dbf4
Rbmxl1	1.10775e-89	0.449731	0.706	0.177	2.20454e-85	1	Rbmxl1
Cenpk	1.26242e-89	0.310405	0.368	0.011	2.51235e-85	1	Cenpk
Uchl5	1.31042e-89	0.384468	0.662	0.149	2.60786e-85	1	Uchl5
Chaf1b	1.33128e-89	0.342924	0.461	0.046	2.64938e-85	1	Chaf1b
Psmc3ip	5.19682e-89	0.304583	0.387	0.015	1.03422e-84	1	Psmc3ip
Set	6.09056e-89	0.644734	0.948	0.625	1.21208e-84	1	Set
Hnrnpa1	1.76655e-88	0.607207	0.94	0.521	3.5156e-84	1	Hnrnpa1
Rcc1	1.83825e-88	0.300663	0.403	0.028	3.6583e-84	1	Rcc1
Rnaseh2b	1.93728e-88	0.358132	0.501	0.051	3.85537e-84	1	Rnaseh2b
Nhp2	2.78822e-88	0.53577	0.709	0.19	5.54884e-84	1	Nhp2
Rps8	3.26024e-88	0.435571	0.998	0.985	6.48821e-84	1	Rps8
Ncapg2	1.11082e-87	0.30145	0.362	0.01	2.21065e-83	1	Ncapg2
Mxd3	2.20406e-87	0.364905	0.335	0.002	4.38631e-83	1	Mxd3
Uchl3	5.80902e-87	0.422424	0.701	0.178	1.15605e-82	1	Uchl3
Pold1	6.69429e-87	0.309058	0.417	0.034	1.33223e-82	1	Pold1
Cox5b	9.5821e-87	0.483013	0.977	0.734	1.90693e-82	1	Cox5b
Serbp1	2.43026e-86	0.524037	0.986	0.807	4.83646e-82	1	Serbp1
Rfc1	2.53179e-86	0.364604	0.619	0.132	5.03852e-82	1	Rfc1
Arhgap11a	3.26325e-86	0.333951	0.356	0.015	6.49419e-82	1	Arhgap11a
4930579G24Rik	6.19316e-86	0.25807	0.358	0.015	1.2325e-81	1	4930579G24Rik
Parp1	6.22875e-86	0.350957	0.571	0.12	1.23958e-81	1	Parp1
Hpf1	6.90613e-86	0.51565	0.834	0.298	1.37439e-81	1	Hpf1
Mis18bp1	7.97337e-86	0.336886	0.339	0.007	1.58678e-81	1	Mis18bp1
Cbx3	8.15783e-86	0.527726	0.97	0.62	1.62349e-81	1	Cbx3
Snrpa	8.98519e-86	0.359615	0.654	0.172	1.78814e-81	1	Snrpa
Kif23	9.90358e-86	0.388284	0.399	0.023	1.97091e-81	1	Kif23
Eif4a1	4.56211e-85	0.626226	0.949	0.655	9.07906e-81	1	Eif4a1
Nsd2	6.83538e-85	0.427137	0.675	0.167	1.36031e-80	1	Nsd2
Snrpa1	7.87898e-84	0.485768	0.816	0.276	1.56799e-79	1	Snrpa1
Nelfe	9.734e-84	0.326613	0.553	0.112	1.93716e-79	1	Nelfe
Fh1	1.01918e-83	0.367632	0.625	0.127	2.02827e-79	1	Fh1
Atad5	1.55648e-83	0.318252	0.377	0.029	3.09755e-79	1	Atad5
Lsm6	1.7264e-83	0.438462	0.856	0.369	3.4357e-79	1	Lsm6
E2f1	2.21645e-83	0.324202	0.345	0.015	4.41096e-79	1	E2f1
Hmgn1	5.01735e-83	0.513419	0.604	0.127	9.98503e-79	1	Hmgn1
Nmral1	9.96497e-83	0.302812	0.454	0.052	1.98313e-78	1	Nmral1
Cdca7	1.65606e-82	0.377806	0.433	0.043	3.29573e-78	1	Cdca7
Tex30	2.1416e-82	0.308318	0.609	0.13	4.262e-78	1	Tex30
Nudt5	2.36632e-82	0.378517	0.659	0.165	4.70921e-78	1	Nudt5
Hnrnpa2b1	2.96305e-82	0.511066	0.983	0.777	5.89676e-78	1	Hnrnpa2b1
Hist1h4d	5.88716e-82	0.357774	0.431	0.043	1.1716e-77	1	Hist1h4d
Mis18a	6.86846e-82	0.277629	0.486	0.068	1.36689e-77	1	Mis18a
Mrpl42	7.77023e-82	0.371228	0.799	0.286	1.54635e-77	1	Mrpl42
Oat	8.87985e-82	0.297395	0.568	0.111	1.76718e-77	1	Oat
Eif3l	1.3906e-81	0.390057	0.702	0.184	2.76743e-77	1	Eif3l
Neil3	1.96407e-81	0.315222	0.316	0.002	3.9087e-77	1	Neil3
Plk1	5.91347e-81	0.348958	0.32	0.004	1.17684e-76	1	Plk1
Ipo5	6.00414e-81	0.266305	0.474	0.079	1.19488e-76	1	Ipo5
Supt16	7.7399e-81	0.398363	0.761	0.258	1.54032e-76	1	Supt16
Cdc6	2.2018e-80	0.276029	0.32	0.004	4.3818e-76	1	Cdc6
Hist1h1d	2.45106e-80	0.354583	0.418	0.055	4.87785e-76	1	Hist1h1d
Vars	4.15605e-80	0.32612	0.622	0.134	8.27095e-76	1	Vars
Snrpf	4.29093e-80	0.529627	0.922	0.508	8.53939e-76	1	Snrpf
Aurka	4.31691e-80	0.350614	0.331	0.007	8.59109e-76	1	Aurka
Nxt1	4.55163e-80	0.345026	0.681	0.174	9.0582e-76	1	Nxt1
Actl6a	5.0471e-80	0.316078	0.619	0.149	1.00442e-75	1	Actl6a
Ilf2	5.57558e-80	0.297539	0.597	0.122	1.1096e-75	1	Ilf2
Timeless	3.68637e-79	0.307969	0.381	0.022	7.33625e-75	1	Timeless
Gins4	6.66803e-79	0.256992	0.535	0.108	1.32701e-74	1	Gins4
Depdc1a	1.82892e-78	0.278769	0.314	0.007	3.63973e-74	1	Depdc1a
Rfc2	1.94164e-78	0.420031	0.719	0.219	3.86406e-74	1	Rfc2
Rad21	7.97325e-78	0.470173	0.768	0.257	1.58676e-73	1	Rad21
Reep4	3.58331e-77	0.332901	0.449	0.059	7.13115e-73	1	Reep4
Rps27l	7.6458e-77	0.544734	0.917	0.52	1.52159e-72	1	Rps27l
Rpa1	1.44325e-76	0.340565	0.643	0.154	2.87221e-72	1	Rpa1
Smc3	5.90773e-76	0.377233	0.813	0.294	1.1757e-71	1	Smc3
Dpy30	9.96096e-76	0.40021	0.771	0.261	1.98233e-71	1	Dpy30
Hist1h3a	1.41779e-75	0.284566	0.328	0.019	2.82155e-71	1	Hist1h3a
Hspa14	2.05731e-75	0.315838	0.712	0.215	4.09425e-71	1	Hspa14
Acsl5	2.16712e-75	0.36742	0.7	0.209	4.31278e-71	1	Acsl5
Chek1	3.41966e-75	0.252724	0.308	0.008	6.80547e-71	1	Chek1
Snrnp40	4.25008e-75	0.375114	0.739	0.221	8.45808e-71	1	Snrnp40
Calm3	4.92937e-75	0.441004	0.932	0.513	9.80994e-71	1	Calm3
Cops3	1.16671e-74	0.262299	0.527	0.102	2.32186e-70	1	Cops3
Hsp90b1	2.10964e-74	0.546193	0.972	0.696	4.1984e-70	1	Hsp90b1
Rps26	5.50317e-74	0.388082	0.995	0.96	1.09519e-69	1	Rps26
Etfa	6.91061e-74	0.311136	0.725	0.247	1.37528e-69	1	Etfa
Ncaph2	6.92041e-74	0.344856	0.625	0.131	1.37723e-69	1	Ncaph2
Hnrnpf	7.0207e-74	0.362548	0.986	0.865	1.39719e-69	1	Hnrnpf
Larp7	8.76855e-74	0.292299	0.618	0.157	1.74503e-69	1	Larp7
Kpnb1	3.57054e-73	0.295921	0.643	0.182	7.10573e-69	1	Kpnb1
Rpl35	4.97817e-73	0.422728	0.994	0.911	9.90706e-69	1	Rpl35
Ncl	5.42167e-73	0.63481	0.958	0.666	1.07897e-68	1	Ncl
Cit	6.47023e-73	0.291746	0.292	0.003	1.28764e-68	1	Cit
Nubp1	1.25854e-72	0.34721	0.734	0.224	2.50462e-68	1	Nubp1
Mrpl51	1.28396e-72	0.336825	0.716	0.234	2.55521e-68	1	Mrpl51
Gar1	1.48009e-72	0.367542	0.569	0.131	2.94553e-68	1	Gar1
Ndufc1	1.67038e-72	0.425411	0.844	0.352	3.32422e-68	1	Ndufc1
Nop56	1.89509e-72	0.442783	0.623	0.167	3.77142e-68	1	Nop56
Prdx1	2.37286e-72	0.458667	0.974	0.745	4.72223e-68	1	Prdx1
Ccne1	2.55849e-72	0.261419	0.313	0.021	5.09166e-68	1	Ccne1
Wdr76	9.27088e-72	0.279318	0.476	0.08	1.845e-67	1	Wdr76
Prelid3b	2.64523e-71	0.356895	0.765	0.256	5.26427e-67	1	Prelid3b
Sapcd2	3.80446e-71	0.295051	0.303	0.005	7.57125e-67	1	Sapcd2
Ppa1	4.69537e-71	0.390951	0.732	0.28	9.34426e-67	1	Ppa1
Mrpl28	7.97861e-71	0.289844	0.595	0.149	1.58782e-66	1	Mrpl28
Cenpx	1.7312e-70	0.348629	0.797	0.291	3.44526e-66	1	Cenpx
Casp8ap2	1.95081e-70	0.286535	0.657	0.188	3.88231e-66	1	Casp8ap2
Npm1	2.41137e-70	0.583605	0.981	0.844	4.79886e-66	1	Npm1
Bub3	2.54138e-70	0.467321	0.808	0.341	5.05759e-66	1	Bub3
Mlf1	2.58312e-70	0.264421	0.368	0.035	5.14067e-66	1	Mlf1
Samd1	5.4833e-70	0.297192	0.418	0.065	1.09123e-65	1	Samd1
Atpif1	5.68997e-70	0.378768	0.876	0.408	1.13236e-65	1	Atpif1
Aspm	7.00519e-70	0.313354	0.282	0.003	1.3941e-65	1	Aspm
Mif	1.03874e-69	0.503043	0.966	0.707	2.06721e-65	1	Mif
Cox7a2	1.15876e-69	0.431121	0.982	0.757	2.30605e-65	1	Cox7a2
Rnaseh2a	2.20027e-69	0.26497	0.525	0.104	4.37876e-65	1	Rnaseh2a
Tuba4a	2.25301e-69	0.348588	0.6	0.151	4.48371e-65	1	Tuba4a
Psip1	2.43255e-69	0.447068	0.856	0.36	4.84102e-65	1	Psip1
Hmbs	2.86548e-69	0.257109	0.482	0.088	5.70259e-65	1	Hmbs
Srrt	3.31472e-69	0.311509	0.6	0.149	6.59662e-65	1	Srrt
Pfdn6	3.49996e-69	0.326325	0.757	0.245	6.96527e-65	1	Pfdn6
Prmt1	9.2844e-69	0.410382	0.769	0.285	1.84769e-64	1	Prmt1
Paics	9.95836e-69	0.39068	0.686	0.2	1.98181e-64	1	Paics
Dnajc9	3.70055e-68	0.424311	0.892	0.455	7.36447e-64	1	Dnajc9
Cdca7l	7.35249e-68	0.262514	0.404	0.053	1.46322e-63	1	Cdca7l
Sfxn1	1.70087e-67	0.286797	0.499	0.109	3.3849e-63	1	Sfxn1
Dkc1	1.90217e-67	0.342162	0.504	0.101	3.78551e-63	1	Dkc1
Mthfd2	2.18163e-67	0.281428	0.59	0.151	4.34166e-63	1	Mthfd2
Exosc8	2.21978e-67	0.386332	0.831	0.326	4.41759e-63	1	Exosc8
Cdc123	2.72541e-67	0.260525	0.611	0.168	5.42384e-63	1	Cdc123
Cbfb	4.43444e-67	0.250843	0.703	0.233	8.82498e-63	1	Cbfb
Mrpl12	6.68853e-67	0.340965	0.674	0.214	1.33109e-62	1	Mrpl12
Pimreg	1.06147e-66	0.285904	0.268	0.002	2.11243e-62	1	Pimreg
Ssr2	1.31103e-66	0.360907	0.804	0.314	2.60908e-62	1	Ssr2
Rps12	1.43218e-66	0.337423	0.997	0.987	2.85018e-62	1	Rps12
Elof1	2.50135e-66	0.314345	0.742	0.235	4.97793e-62	1	Elof1
Timm50	2.59052e-66	0.284687	0.577	0.131	5.15539e-62	1	Timm50
Ddx1	2.81461e-66	0.261386	0.51	0.108	5.60135e-62	1	Ddx1
Pdap1	5.47748e-66	0.408943	0.831	0.33	1.09007e-61	1	Pdap1
Rcc2	6.95162e-66	0.273601	0.561	0.146	1.38344e-61	1	Rcc2
Fam111a	7.10917e-66	0.265133	0.605	0.176	1.4148e-61	1	Fam111a
Mpp6	7.44084e-66	0.281276	0.598	0.158	1.4808e-61	1	Mpp6
Nde1	8.81233e-66	0.261143	0.444	0.081	1.75374e-61	1	Nde1
Gspt1	8.93199e-66	0.322422	0.684	0.222	1.77756e-61	1	Gspt1
Snrpb	9.01173e-66	0.436849	0.939	0.583	1.79342e-61	1	Snrpb
Cmtm7	9.79044e-66	0.519061	0.963	0.704	1.9484e-61	1	Cmtm7
Psmb2	1.46913e-65	0.429493	0.938	0.538	2.92371e-61	1	Psmb2
Trappc1	2.86074e-65	0.259161	0.644	0.194	5.69317e-61	1	Trappc1
Dynll2	5.19343e-65	0.360538	0.709	0.216	1.03354e-60	1	Dynll2
Hnrnpu	1.03906e-64	0.439349	0.951	0.634	2.06784e-60	1	Hnrnpu
U2af1	1.08359e-64	0.431123	0.844	0.384	2.15646e-60	1	U2af1
Nudc	2.12853e-64	0.440782	0.842	0.351	4.236e-60	1	Nudc
Rpl8	2.19815e-64	0.337872	0.998	0.973	4.37454e-60	1	Rpl8
C1qbp	2.94468e-64	0.413429	0.637	0.208	5.86022e-60	1	C1qbp
Dnajc2	3.0048e-64	0.343836	0.808	0.34	5.97986e-60	1	Dnajc2
Psmd1	3.39655e-64	0.25195	0.649	0.216	6.75948e-60	1	Psmd1
Cenpa	3.40213e-64	0.780698	0.729	0.314	6.77057e-60	1	Cenpa
Cdc25b	3.46378e-64	0.303262	0.426	0.08	6.89327e-60	1	Cdc25b
Naa50	3.49771e-64	0.335032	0.747	0.246	6.96079e-60	1	Naa50
Ddx39b	3.73574e-64	0.422498	0.891	0.446	7.4345e-60	1	Ddx39b
Atp5b	4.50602e-64	0.445024	0.961	0.756	8.96742e-60	1	Atp5b
Nsmce4a	7.43625e-64	0.312692	0.845	0.344	1.47989e-59	1	Nsmce4a
Uqcr10	9.68104e-64	0.406399	0.955	0.635	1.92662e-59	1	Uqcr10
Hist1h2bm	9.96723e-64	0.254845	0.259	0.004	1.98358e-59	1	Hist1h2bm
Rps3a1	1.06119e-63	0.315443	0.997	0.983	2.11186e-59	1	Rps3a1
Tcp1	1.30907e-63	0.4406	0.846	0.386	2.60518e-59	1	Tcp1
Ndufab1	1.51027e-63	0.382405	0.815	0.338	3.0056e-59	1	Ndufab1
Suz12	1.5304e-63	0.312149	0.766	0.288	3.04566e-59	1	Suz12
Cyc1	2.88524e-63	0.294617	0.752	0.297	5.74191e-59	1	Cyc1
Cct5	5.41388e-63	0.450432	0.888	0.443	1.07742e-58	1	Cct5
A430005L14Rik	5.71467e-63	0.250523	0.522	0.114	1.13728e-58	1	A430005L14Rik
Smarcc1	8.89571e-63	0.293117	0.596	0.153	1.77034e-58	1	Smarcc1
Pin1	1.14295e-62	0.250208	0.658	0.207	2.27458e-58	1	Pin1
Nans	1.23061e-62	0.299405	0.727	0.246	2.44904e-58	1	Nans
Atp5f1	1.7488e-62	0.409157	0.958	0.699	3.48029e-58	1	Atp5f1
Eif3b	2.38506e-62	0.30869	0.648	0.216	4.7465e-58	1	Eif3b
G3bp1	2.62475e-62	0.420878	0.88	0.427	5.22351e-58	1	G3bp1
Psmc1	2.70462e-62	0.258139	0.601	0.168	5.38247e-58	1	Psmc1
Tkt	2.72314e-62	0.377401	0.862	0.448	5.41933e-58	1	Tkt
Rpn1	2.90929e-62	0.312526	0.6	0.163	5.78978e-58	1	Rpn1
Ifi30	2.54998e-61	0.262985	0.366	0.048	5.07471e-57	1	Ifi30
Sae1	9.32352e-61	0.300583	0.812	0.337	1.85547e-56	1	Sae1
Rpl14	9.73962e-61	0.364847	0.991	0.961	1.93828e-56	1	Rpl14
Acp1	1.20105e-60	0.269786	0.719	0.251	2.39021e-56	1	Acp1
Csrp1	1.20571e-60	0.335997	0.763	0.263	2.39948e-56	1	Csrp1
Ckap5	1.42055e-60	0.312361	0.497	0.106	2.82704e-56	1	Ckap5
Vdac1	2.13878e-60	0.33679	0.731	0.258	4.25638e-56	1	Vdac1
Cdkn2c	6.9133e-60	0.303161	0.563	0.171	1.37582e-55	1	Cdkn2c
Mrto4	9.72189e-60	0.268099	0.525	0.138	1.93475e-55	1	Mrto4
Lbr	1.12825e-59	0.304104	0.759	0.305	2.24533e-55	1	Lbr
Hnrnpd	1.17314e-59	0.456656	0.924	0.566	2.33466e-55	1	Hnrnpd
Cep57	1.70463e-59	0.266366	0.53	0.133	3.39238e-55	1	Cep57
Atp5o	2.52665e-59	0.431819	0.955	0.635	5.0283e-55	1	Atp5o
Rbbp4	2.58828e-59	0.433661	0.876	0.426	5.15093e-55	1	Rbbp4
Snrpd2	3.11202e-59	0.401976	0.913	0.526	6.19323e-55	1	Snrpd2
Myb	3.48711e-59	0.260674	0.428	0.086	6.93971e-55	1	Myb
Phf5a	5.18957e-59	0.309224	0.763	0.297	1.03278e-54	1	Phf5a
Slc29a1	5.85989e-59	0.280105	0.484	0.084	1.16618e-54	1	Slc29a1
Rplp0	6.30529e-59	0.316467	0.996	0.966	1.25482e-54	1	Rplp0
Rpl32	7.32152e-59	0.274789	0.999	0.992	1.45706e-54	1	Rpl32
Lgals1	7.45951e-59	0.444162	0.998	0.951	1.48452e-54	1	Lgals1
Sumo3	9.02084e-59	0.316065	0.737	0.264	1.79524e-54	1	Sumo3
Thoc7	1.51e-58	0.291133	0.815	0.335	3.00506e-54	1	Thoc7
Hprt	3.24961e-58	0.395741	0.916	0.508	6.46704e-54	1	Hprt
Commd1	3.33903e-58	0.292535	0.746	0.256	6.64501e-54	1	Commd1
Mbd3	4.89256e-58	0.259808	0.623	0.198	9.73669e-54	1	Mbd3
Impa2	5.01418e-58	0.287583	0.672	0.207	9.97872e-54	1	Impa2
Magoh	6.42657e-58	0.352355	0.863	0.425	1.27895e-53	1	Magoh
Rpl10a	7.80195e-58	0.355338	0.996	0.931	1.55267e-53	1	Rpl10a
Pkm	2.53332e-57	0.36865	0.99	0.897	5.04156e-53	1	Pkm
Etfb	3.68502e-57	0.381726	0.768	0.294	7.33355e-53	1	Etfb
Snrnp25	5.40374e-57	0.25092	0.61	0.161	1.0754e-52	1	Snrnp25
Cisd1	5.59167e-57	0.315461	0.614	0.169	1.1128e-52	1	Cisd1
Psmd13	6.67186e-57	0.336109	0.826	0.353	1.32777e-52	1	Psmd13
Ung	6.99817e-57	0.273082	0.273	0.017	1.39271e-52	1	Ung
Psmc2	7.78961e-57	0.30934	0.803	0.304	1.55021e-52	1	Psmc2
Swi5	8.721e-57	0.366641	0.847	0.405	1.73557e-52	1	Swi5
Polr2l	1.00631e-56	0.267175	0.74	0.311	2.00266e-52	1	Polr2l
Snrpd3	1.04072e-56	0.365653	0.815	0.33	2.07114e-52	1	Snrpd3
Eif4a3	1.27707e-56	0.352795	0.808	0.325	2.54151e-52	1	Eif4a3
Nolc1	3.15701e-56	0.266742	0.485	0.118	6.28276e-52	1	Nolc1
Sdhb	3.32083e-56	0.360473	0.871	0.444	6.60878e-52	1	Sdhb
Galk1	5.35616e-56	0.314976	0.57	0.158	1.06593e-51	1	Galk1
Pgp	5.48744e-56	0.271522	0.691	0.231	1.09206e-51	1	Pgp
Eif1ad	5.96419e-56	0.25602	0.542	0.123	1.18693e-51	1	Eif1ad
Fbl	6.35403e-56	0.341304	0.691	0.256	1.26452e-51	1	Fbl
Rps6	8.42809e-56	0.361679	0.978	0.869	1.67727e-51	1	Rps6
Gars	1.97856e-55	0.260778	0.586	0.173	3.93753e-51	1	Gars
Psma6	3.70458e-55	0.381354	0.89	0.47	7.37248e-51	1	Psma6
Psma1	4.15838e-55	0.35338	0.9	0.498	8.27558e-51	1	Psma1
Ak2	5.05443e-55	0.270793	0.781	0.324	1.00588e-50	1	Ak2
Eri1	6.06261e-55	0.27737	0.705	0.247	1.20652e-50	1	Eri1
Atp5g3	6.59764e-55	0.391157	0.943	0.603	1.313e-50	1	Atp5g3
Psmc4	8.67152e-55	0.262959	0.743	0.289	1.72572e-50	1	Psmc4
Ddost	1.15136e-54	0.323213	0.863	0.412	2.29132e-50	1	Ddost
Vrk1	1.50267e-54	0.336135	0.8	0.346	2.99046e-50	1	Vrk1
Rif1	3.01114e-54	0.282597	0.651	0.212	5.99247e-50	1	Rif1
Snu13	4.16018e-54	0.367856	0.844	0.405	8.27918e-50	1	Snu13
Ldha	6.58766e-54	0.399673	0.986	0.877	1.31101e-49	1	Ldha
Psmb4	6.98108e-54	0.36418	0.929	0.549	1.38931e-49	1	Psmb4
Cox6a1	7.85258e-54	0.383909	0.931	0.522	1.56274e-49	1	Cox6a1
Nudt21	1.10302e-53	0.354707	0.844	0.39	2.19511e-49	1	Nudt21
Nono	1.42257e-53	0.365288	0.877	0.417	2.83106e-49	1	Nono
Pdia6	1.67848e-53	0.431278	0.92	0.514	3.34034e-49	1	Pdia6
Mrpl17	1.86274e-53	0.260216	0.641	0.214	3.70705e-49	1	Mrpl17
Pgk1	2.18527e-53	0.356932	0.973	0.729	4.3489e-49	1	Pgk1
Maz	3.70447e-53	0.277418	0.741	0.268	7.37226e-49	1	Maz
Eif3i	4.68184e-53	0.3639	0.902	0.505	9.31733e-49	1	Eif3i
Erg28	6.58105e-53	0.298056	0.696	0.245	1.3097e-48	1	Erg28
Cct3	1.38567e-52	0.401016	0.789	0.329	2.75763e-48	1	Cct3
Eprs	1.49416e-52	0.256447	0.596	0.183	2.97353e-48	1	Eprs
Gm4332	3.08871e-52	0.270595	0.753	0.32	6.14684e-48	1	Gm4332
Dazap1	3.70148e-52	0.284154	0.8	0.352	7.36631e-48	1	Dazap1
Ndufc2	5.18296e-52	0.389635	0.871	0.426	1.03146e-47	1	Ndufc2
Gm8730	1.75332e-51	0.322915	0.982	0.893	3.48929e-47	1	Gm8730
Rps18	2.22566e-51	0.322795	0.996	0.955	4.42929e-47	1	Rps18
Uba2	4.41566e-51	0.320098	0.765	0.312	8.78761e-47	1	Uba2
Atp5j	4.8757e-51	0.357562	0.969	0.722	9.70313e-47	1	Atp5j
Rpl10	6.18483e-51	0.322614	0.992	0.938	1.23084e-46	1	Rpl10
Vdac3	6.70011e-51	0.340049	0.804	0.346	1.33339e-46	1	Vdac3
Smarca5	7.01611e-51	0.365134	0.849	0.42	1.39628e-46	1	Smarca5
Ndufa5	8.07614e-51	0.366724	0.849	0.382	1.60723e-46	1	Ndufa5
Ybx3	8.27752e-51	0.301874	0.626	0.221	1.64731e-46	1	Ybx3
Tmem14c	8.67596e-51	0.346731	0.87	0.439	1.7266e-46	1	Tmem14c
Psma4	2.28722e-50	0.401509	0.953	0.616	4.55179e-46	1	Psma4
Mrps18c	4.5398e-50	0.254255	0.788	0.327	9.03465e-46	1	Mrps18c
Chchd1	5.27189e-50	0.295785	0.747	0.279	1.04916e-45	1	Chchd1
Manf	6.06895e-50	0.414486	0.929	0.57	1.20778e-45	1	Manf
Smc4	1.06678e-49	0.485781	0.915	0.584	2.123e-45	1	Smc4
Npm3	1.48861e-49	0.279744	0.631	0.215	2.96249e-45	1	Npm3
Cct4	3.33121e-49	0.350648	0.834	0.409	6.62945e-45	1	Cct4
Uqcrc1	4.94768e-49	0.300625	0.782	0.33	9.84639e-45	1	Uqcrc1
Snrpg	1.05518e-48	0.367197	0.953	0.681	2.09991e-44	1	Snrpg
Hnrnpr	1.29134e-48	0.271255	0.813	0.356	2.5699e-44	1	Hnrnpr
Psmb6	1.47413e-48	0.296604	0.891	0.465	2.93366e-44	1	Psmb6
Eif2s1	1.92979e-48	0.31874	0.819	0.385	3.84047e-44	1	Eif2s1
Psmc3	2.16067e-48	0.293869	0.843	0.407	4.29994e-44	1	Psmc3
Nsmce1	2.24116e-48	0.305589	0.743	0.267	4.46014e-44	1	Nsmce1
Sec11c	2.55208e-48	0.416728	0.943	0.608	5.0789e-44	1	Sec11c
Eif3a	8.31116e-48	0.356389	0.867	0.457	1.654e-43	1	Eif3a
Mrpl13	9.82684e-48	0.293329	0.749	0.288	1.95564e-43	1	Mrpl13
Eef1g	1.01377e-47	0.411323	0.94	0.646	2.0175e-43	1	Eef1g
Snrpc	1.04494e-47	0.305849	0.805	0.33	2.07954e-43	1	Snrpc
Rpl36a	1.58969e-47	0.291082	0.984	0.933	3.16365e-43	1	Rpl36a
Atp5k	2.26037e-47	0.338308	0.932	0.619	4.49836e-43	1	Atp5k
Fabp5	2.62664e-47	0.377085	0.895	0.502	5.22728e-43	1	Fabp5
Eif1ax	2.83394e-47	0.374199	0.868	0.426	5.63982e-43	1	Eif1ax
Calm1	4.73177e-47	0.313825	0.991	0.91	9.4167e-43	1	Calm1
Rpl3	1.16986e-46	0.288014	0.997	0.976	2.32813e-42	1	Rpl3
Rsl1d1	1.65436e-46	0.29301	0.714	0.286	3.29233e-42	1	Rsl1d1
Tmem256	2.10618e-46	0.277618	0.834	0.384	4.19151e-42	1	Tmem256
Med30	3.11824e-46	0.263408	0.765	0.305	6.2056e-42	1	Med30
Ssb	3.63165e-46	0.350927	0.94	0.63	7.22735e-42	1	Ssb
Rack1	3.84796e-46	0.252487	0.996	0.966	7.65782e-42	1	Rack1
Rps19	5.35465e-46	0.253507	0.997	0.97	1.06563e-41	1	Rps19
Rpl31	1.60478e-45	0.365887	0.955	0.707	3.19367e-41	1	Rpl31
Rps25	3.62286e-45	0.326019	0.982	0.866	7.20986e-41	1	Rps25
Eif5a	3.85983e-45	0.402193	0.973	0.818	7.68144e-41	1	Eif5a
Uqcc2	5.55953e-45	0.264741	0.796	0.348	1.1064e-40	1	Uqcc2
Gm10260	6.14096e-45	0.334965	0.973	0.826	1.22211e-40	1	Gm10260
Fus	6.79448e-45	0.303192	0.818	0.365	1.35217e-40	1	Fus
Eno3	1.45117e-44	0.294301	0.489	0.159	2.88798e-40	1	Eno3
Ppm1g	1.46419e-44	0.26618	0.719	0.276	2.91389e-40	1	Ppm1g
Sfpq	5.68369e-44	0.316656	0.834	0.41	1.13111e-39	1	Sfpq
Srsf6	6.90494e-44	0.270865	0.682	0.244	1.37415e-39	1	Srsf6
Atp5g1	1.47583e-43	0.340249	0.832	0.452	2.93705e-39	1	Atp5g1
Casp3	1.97916e-43	0.300994	0.805	0.388	3.93873e-39	1	Casp3
Rdx	2.67346e-43	0.26064	0.792	0.336	5.32045e-39	1	Rdx
Sf3b5	3.92567e-43	0.276314	0.91	0.52	7.81247e-39	1	Sf3b5
Pomp	4.27984e-43	0.35422	0.955	0.688	8.5173e-39	1	Pomp
Hist1h1e	5.2406e-43	0.327746	0.608	0.204	1.04293e-38	1	Hist1h1e
Jpt1	5.48589e-43	0.402819	0.945	0.651	1.09175e-38	1	Jpt1
Ptpn7	1.07879e-41	0.291547	0.763	0.308	2.14691e-37	1	Ptpn7
Ap2s1	2.22544e-41	0.264155	0.852	0.41	4.42884e-37	1	Ap2s1
Cct6a	4.54765e-41	0.327921	0.802	0.367	9.05028e-37	1	Cct6a
Ppp1ca	6.37443e-41	0.279487	0.975	0.797	1.26858e-36	1	Ppp1ca
Cnih4	1.22475e-40	0.287088	0.786	0.323	2.43737e-36	1	Cnih4
Dnajb11	3.41984e-40	0.258574	0.822	0.384	6.80583e-36	1	Dnajb11
Cct8	5.58503e-40	0.368957	0.871	0.504	1.11148e-35	1	Cct8
Pcbp1	6.02599e-40	0.289525	0.881	0.513	1.19923e-35	1	Pcbp1
Phb2	1.51364e-39	0.295033	0.817	0.398	3.0123e-35	1	Phb2
Sumo2	1.72443e-39	0.308789	0.983	0.875	3.43179e-35	1	Sumo2
Metap2	2.33994e-39	0.287839	0.799	0.368	4.65671e-35	1	Metap2
Cct2	2.52369e-39	0.33532	0.908	0.568	5.0224e-35	1	Cct2
Sptssa	2.64984e-39	0.262562	0.829	0.368	5.27345e-35	1	Sptssa
Minos1	2.73189e-39	0.289418	0.974	0.746	5.43673e-35	1	Minos1
Gdi2	2.82999e-39	0.265939	0.924	0.59	5.63196e-35	1	Gdi2
Psmb9	2.91337e-39	0.296254	0.99	0.849	5.7979e-35	1	Psmb9
Psmd14	4.19824e-39	0.270213	0.812	0.359	8.35492e-35	1	Psmd14
Hspa9	1.08019e-38	0.253937	0.555	0.189	2.14969e-34	1	Hspa9
Strap	1.61867e-38	0.258987	0.784	0.366	3.22131e-34	1	Strap
Uqcrb	1.6646e-38	0.301413	0.963	0.712	3.31273e-34	1	Uqcrb
Rpl4	2.17396e-38	0.285433	0.989	0.905	4.32639e-34	1	Rpl4
Mrps14	2.47892e-38	0.265371	0.914	0.517	4.9333e-34	1	Mrps14
Ndufb8	2.73931e-38	0.26774	0.903	0.536	5.45151e-34	1	Ndufb8
Mrpl20	3.39948e-38	0.261977	0.785	0.34	6.76531e-34	1	Mrpl20
Raly	3.9539e-38	0.338736	0.928	0.557	7.86867e-34	1	Raly
Psma5	8.03577e-38	0.306182	0.853	0.458	1.5992e-33	1	Psma5
Psma7	1.16079e-37	0.322932	0.956	0.712	2.3101e-33	1	Psma7
Txnl1	3.92754e-37	0.306463	0.883	0.472	7.8162e-33	1	Txnl1
Atp5c1	3.9371e-37	0.292344	0.962	0.76	7.83522e-33	1	Atp5c1
Cct7	8.60598e-37	0.317712	0.884	0.486	1.71268e-32	1	Cct7
Canx	9.5747e-37	0.299507	0.862	0.442	1.90546e-32	1	Canx
Erdr1	4.55588e-36	0.313845	0.878	0.493	9.06665e-32	1	Erdr1
Tpi1	5.81001e-36	0.321619	0.933	0.636	1.15625e-31	1	Tpi1
Ndufb6	1.90261e-35	0.251605	0.788	0.358	3.78638e-31	1	Ndufb6
Psma2	2.62672e-35	0.287261	0.971	0.762	5.22743e-31	1	Psma2
Ywhah	8.78797e-35	0.284283	0.939	0.578	1.74889e-30	1	Ywhah
Clic1	1.01633e-34	0.286691	0.996	0.917	2.0226e-30	1	Clic1
Hspd1	1.07754e-34	0.281312	0.812	0.451	2.14442e-30	1	Hspd1
Pebp1	1.92815e-34	0.286533	0.871	0.508	3.83721e-30	1	Pebp1
Psmb5	1.92881e-34	0.251141	0.855	0.477	3.83852e-30	1	Psmb5
Ywhab	5.28013e-34	0.294276	0.912	0.511	1.0508e-29	1	Ywhab
Ywhae	3.19036e-33	0.284324	0.927	0.613	6.34913e-29	1	Ywhae
Atp5a1	3.38587e-33	0.329885	0.937	0.655	6.73822e-29	1	Atp5a1
M6pr	4.36702e-33	0.296963	0.878	0.495	8.69081e-29	1	M6pr
Psmb3	6.51665e-33	0.273261	0.959	0.697	1.29688e-28	1	Psmb3
Krtcap2	7.35205e-33	0.306641	0.963	0.736	1.46313e-28	1	Krtcap2
Ube2n	8.99684e-33	0.2723	0.925	0.541	1.79046e-28	1	Ube2n
Prdx2	1.21637e-32	0.269862	0.828	0.427	2.4207e-28	1	Prdx2
Ppp1r14b	5.53722e-32	0.292954	0.743	0.358	1.10196e-27	1	Ppp1r14b
Gm10076	8.36267e-32	0.264807	0.889	0.541	1.66426e-27	1	Gm10076
Ube2l3	9.08734e-32	0.296919	0.93	0.582	1.80847e-27	1	Ube2l3
Fam96a	2.81379e-31	0.257327	0.822	0.385	5.59972e-27	1	Fam96a
Psmb8	4.6482e-31	0.256344	0.992	0.938	9.25037e-27	1	Psmb8
Cycs	1.05989e-30	0.324151	0.913	0.595	2.1093e-26	1	Cycs
Mt1	3.00587e-30	0.337983	0.371	0.126	5.98199e-26	1	Mt1
Rpl15	1.03435e-29	0.279849	0.958	0.742	2.05845e-25	1	Rpl15
Vdac2	1.27095e-29	0.258586	0.914	0.593	2.52932e-25	1	Vdac2
Ndufb9	3.96242e-29	0.261794	0.938	0.623	7.88562e-25	1	Ndufb9
Chchd10	2.32332e-28	0.30759	0.87	0.546	4.62363e-24	1	Chchd10
Eif3c	1.06054e-27	0.260558	0.884	0.526	2.11058e-23	1	Eif3c
Ssr4	1.31659e-27	0.252755	0.949	0.662	2.62015e-23	1	Ssr4
Ndufb7	3.86169e-27	0.256363	0.966	0.708	7.68514e-23	1	Ndufb7
Slc25a4	5.10734e-27	0.253044	0.813	0.454	1.01641e-22	1	Slc25a4
Eif2s2	7.31621e-27	0.253945	0.89	0.528	1.456e-22	1	Eif2s2
1810037I17Rik	1.08274e-26	0.278647	0.953	0.726	2.15476e-22	1	1810037I17Rik
Uqcrq	1.99188e-26	0.255074	0.94	0.675	3.96405e-22	1	Uqcrq
Calm2	4.10777e-25	0.284375	0.953	0.76	8.17487e-21	1	Calm2
Arl6ip1	2.82533e-10	0.38201	0.969	0.821	5.62269e-06	1	Arl6ip1
Emb	1.29962e-122	1.25845	0.711	0.206	2.58638e-118	2	Emb
Rps11	3.67785e-101	0.434592	0.999	0.992	7.3193e-97	2	Rps11
Ms4a4b	2.68852e-94	0.975185	0.879	0.526	5.35041e-90	2	Ms4a4b
Rps27	1.21912e-90	0.420563	1	0.994	2.42617e-86	2	Rps27
S1pr1	2.70879e-77	0.872817	0.546	0.135	5.39076e-73	2	S1pr1
Trbc2	7.07904e-76	0.629632	0.981	0.902	1.4088e-71	2	Trbc2
mt-Nd4	1.39504e-74	0.55027	0.987	0.914	2.77627e-70	2	mt-Nd4
Ms4a6b	2.06997e-66	0.578583	0.929	0.804	4.11944e-62	2	Ms4a6b
Itgb1	2.19538e-66	1.15222	0.552	0.235	4.36903e-62	2	Itgb1
Slamf6	4.80572e-65	0.763531	0.577	0.228	9.56386e-61	2	Slamf6
mt-Cytb	4.63923e-64	0.45103	0.998	0.971	9.23252e-60	2	mt-Cytb
Rps29	3.8961e-59	0.327526	1	0.992	7.75363e-55	2	Rps29
Cox7a2l	4.11756e-56	0.525877	0.895	0.764	8.19436e-52	2	Cox7a2l
Rpl39	5.80909e-56	0.3452	1	0.99	1.15607e-51	2	Rpl39
Rpl18	1.30846e-54	0.314688	0.999	0.976	2.60396e-50	2	Rpl18
Btg2	2.43112e-53	0.740573	0.757	0.474	4.83816e-49	2	Btg2
Sh2d1a	4.72028e-53	0.844062	0.611	0.34	9.39383e-49	2	Sh2d1a
mt-Co1	5.69096e-53	0.431261	0.949	0.856	1.13256e-48	2	mt-Co1
Samhd1	8.39325e-53	0.646954	0.887	0.76	1.67034e-48	2	Samhd1
Rpl18a	1.21666e-52	0.258461	1	0.991	2.42128e-48	2	Rpl18a
Crlf3	3.37141e-52	0.615799	0.742	0.497	6.70943e-48	2	Crlf3
Cytip	4.41417e-52	0.487287	0.941	0.841	8.78463e-48	2	Cytip
Klf3	7.79311e-45	0.589498	0.322	0.069	1.55091e-40	2	Klf3
Rps10	1.30799e-44	0.255857	0.999	0.984	2.60302e-40	2	Rps10
Tmsb10	5.74924e-43	0.270842	1	0.992	1.14416e-38	2	Tmsb10
Ifi203	1.04245e-42	0.566122	0.798	0.607	2.07459e-38	2	Ifi203
Ramp3	1.81615e-40	0.699992	0.262	0.048	3.61432e-36	2	Ramp3
Rpl281	2.79595e-40	0.387287	0.988	0.948	5.56422e-36	2	Rpl28
Ighm	1.21752e-38	0.573545	0.577	0.339	2.423e-34	2	Ighm
Tmsb4x	7.62542e-38	0.251531	1	1	1.51753e-33	2	Tmsb4x
Nrp1	2.16825e-36	0.527402	0.271	0.06	4.31504e-32	2	Nrp1
Gm8995	2.75465e-36	0.518059	0.827	0.663	5.48202e-32	2	Gm8995
Eef2	4.78814e-36	0.323496	0.959	0.917	9.52888e-32	2	Eef2
mt-Rnr1	1.94826e-35	0.311022	0.979	0.954	3.87723e-31	2	mt-Rnr1
Slc4a7	1.04402e-34	0.511164	0.401	0.172	2.0777e-30	2	Slc4a7
Eif3h	2.74393e-34	0.336282	0.913	0.857	5.4607e-30	2	Eif3h
Rplp01	3.87491e-34	0.330818	0.993	0.967	7.71146e-30	2	Rplp0
Vps37b	3.2382e-33	0.696873	0.659	0.41	6.44434e-29	2	Vps37b
Rpl7	3.56852e-33	0.300614	0.985	0.948	7.10172e-29	2	Rpl7
Dgka	4.02589e-33	0.432602	0.521	0.306	8.01193e-29	2	Dgka
Gm87301	8.97848e-33	0.3635	0.964	0.897	1.78681e-28	2	Gm8730
Naca	2.11532e-32	0.349561	0.978	0.947	4.2097e-28	2	Naca
mt-Nd2	4.83298e-32	0.366317	0.967	0.891	9.61812e-28	2	mt-Nd2
Itga4	5.60707e-32	0.579435	0.343	0.134	1.11586e-27	2	Itga4
Mndal	9.72097e-32	0.489408	0.778	0.597	1.93457e-27	2	Mndal
Tcf7	1.36606e-31	0.42206	0.176	0.021	2.7186e-27	2	Tcf7
Eif3f	4.6664e-31	0.29884	0.942	0.875	9.28661e-27	2	Eif3f
Evl	1.81858e-30	0.385147	0.206	0.042	3.61915e-26	2	Evl
Klf21	5.31854e-29	0.540045	0.728	0.496	1.05844e-24	2	Klf2
Rack11	7.52682e-29	0.254673	0.996	0.967	1.49791e-24	2	Rack1
mt-Nd5	1.72839e-27	0.380485	0.758	0.613	3.43967e-23	2	mt-Nd5
Rps3a11	2.67308e-27	0.26017	0.999	0.983	5.31969e-23	2	Rps3a1
Skap1	2.95288e-27	0.356024	0.795	0.689	5.87652e-23	2	Skap1
Tmem64	3.37243e-27	0.543252	0.38	0.176	6.71146e-23	2	Tmem64
Stat5b	1.06562e-26	0.481021	0.479	0.275	2.12069e-22	2	Stat5b
Gramd3	8.50959e-26	0.594713	0.404	0.209	1.69349e-21	2	Gramd3
Cd7	1.63137e-25	0.376416	0.211	0.045	3.24658e-21	2	Cd7
Smap1	1.92628e-25	0.382204	0.58	0.425	3.83349e-21	2	Smap1
Ifi27l2a	3.2185e-25	0.30735	0.993	0.983	6.40513e-21	2	Ifi27l2a
Fam107b	6.84817e-25	0.418696	0.724	0.584	1.36285e-20	2	Fam107b
2020-09-06	1.13676e-24	0.3906	0.46	0.296	2.26227e-20	2	2020-09-06
Arpc3	1.67703e-24	0.350527	0.933	0.869	3.33746e-20	2	Arpc3
Atp1b3	1.78177e-24	0.496099	0.659	0.53	3.54589e-20	2	Atp1b3
Coro1a	2.84816e-24	0.281979	0.976	0.949	5.66812e-20	2	Coro1a
Rgs2	2.85781e-24	0.638334	0.607	0.432	5.68733e-20	2	Rgs2
Rps181	3.52385e-24	0.253687	0.988	0.957	7.01281e-20	2	Rps18
Elf1	1.42203e-23	0.366003	0.76	0.643	2.82998e-19	2	Elf1
Rpl351	1.94195e-23	0.274009	0.961	0.917	3.86468e-19	2	Rpl35
Pja1	4.52821e-23	0.444732	0.315	0.147	9.01158e-19	2	Pja1
Gm15772	6.94869e-23	0.252912	0.982	0.937	1.38286e-18	2	Gm15772
Supt4a	8.28975e-23	0.352956	0.757	0.64	1.64974e-18	2	Supt4a
Smpdl3a	1.29842e-22	0.341415	0.63	0.474	2.58398e-18	2	Smpdl3a
Ier2	1.54743e-22	0.545252	0.558	0.402	3.07954e-18	2	Ier2
Rflnb	2.89142e-22	0.401873	0.154	0.023	5.75421e-18	2	Rflnb
Rasgrp2	1.01678e-21	0.312889	0.192	0.056	2.0235e-17	2	Rasgrp2
Zcchc11	1.09999e-21	0.379401	0.599	0.43	2.18908e-17	2	Zcchc11
Lsp1	3.68225e-21	0.316042	0.808	0.766	7.32806e-17	2	Lsp1
Arhgdib	3.69884e-21	0.280939	0.943	0.893	7.36106e-17	2	Arhgdib
Klhl6	3.76571e-21	0.391988	0.355	0.178	7.49415e-17	2	Klhl6
Gm8369	4.73081e-21	0.399015	0.292	0.129	9.41479e-17	2	Gm8369
Rps27rt	1.33584e-20	0.347197	0.827	0.729	2.65846e-16	2	Rps27rt
Arl5c	1.37841e-20	0.452489	0.485	0.31	2.74317e-16	2	Arl5c
Ripor2	2.24231e-20	0.39574	0.318	0.152	4.46242e-16	2	Ripor2
Nop53	2.95656e-20	0.323588	0.713	0.604	5.88385e-16	2	Nop53
Myl12b	2.02032e-19	0.256194	0.93	0.89	4.02063e-15	2	Myl12b
Sp100	1.0195e-18	0.330093	0.713	0.602	2.0289e-14	2	Sp100
A930005H10Rik	1.0287e-18	0.295562	0.218	0.079	2.04722e-14	2	A930005H10Rik
Trbc1	2.65001e-18	0.500766	0.562	0.437	5.27379e-14	2	Trbc1
Tcp11l2	3.92126e-18	0.354156	0.363	0.177	7.80369e-14	2	Tcp11l2
Cd9	4.15022e-18	0.344352	0.289	0.135	8.25936e-14	2	Cd9
Tmem71	4.42464e-18	0.319569	0.339	0.183	8.80547e-14	2	Tmem71
S100a10	4.84093e-18	0.315288	0.962	0.958	9.63394e-14	2	S100a10
Cnn2	1.12288e-17	0.277137	0.769	0.7	2.23463e-13	2	Cnn2
S1pr4	1.23632e-17	0.33924	0.441	0.276	2.46041e-13	2	S1pr4
Smchd1	2.43939e-17	0.383167	0.512	0.382	4.85462e-13	2	Smchd1
Cmah	2.56386e-17	0.320642	0.231	0.098	5.10234e-13	2	Cmah
S100a11	4.28651e-17	0.340778	0.804	0.78	8.53059e-13	2	S100a11
Ets1	4.49684e-17	0.258349	0.904	0.84	8.94915e-13	2	Ets1
Prkcq	4.67131e-17	0.327447	0.355	0.211	9.29638e-13	2	Prkcq
mt-Atp6	2.62524e-16	0.414624	0.6	0.459	5.22449e-12	2	mt-Atp6
Cd96	2.70059e-16	0.310878	0.206	0.083	5.37445e-12	2	Cd96
Gmfg	4.47418e-16	0.263463	0.852	0.774	8.90406e-12	2	Gmfg
Sub1	5.32142e-16	0.346059	0.851	0.797	1.05902e-11	2	Sub1
Adk	6.38677e-16	0.482523	0.431	0.295	1.27103e-11	2	Adk
Actg1	1.01417e-15	0.284134	0.999	0.994	2.01831e-11	2	Actg1
Sh3bgrl	1.27411e-15	0.354183	0.518	0.382	2.5356e-11	2	Sh3bgrl
Slfn1	1.28252e-15	0.298486	0.335	0.201	2.55234e-11	2	Slfn1
Fos	1.43127e-15	0.385845	0.43	0.268	2.84838e-11	2	Fos
Smc41	8.04306e-15	0.315457	0.737	0.613	1.60065e-10	2	Smc4
Pecam1	1.44528e-14	0.283602	0.22	0.093	2.87626e-10	2	Pecam1
Tbc1d4	1.55329e-14	0.270772	0.11	0.022	3.09121e-10	2	Tbc1d4
C230096K16Rik	1.57548e-14	0.30623	0.178	0.06	3.13536e-10	2	C230096K16Rik
Atp10d	2.1132e-14	0.325365	0.315	0.175	4.20548e-10	2	Atp10d
Cd84	2.12712e-14	0.29771	0.489	0.353	4.23318e-10	2	Cd84
Stat4	2.25844e-14	0.296624	0.309	0.171	4.49453e-10	2	Stat4
Mbnl1	3.27641e-14	0.278451	0.881	0.837	6.52037e-10	2	Mbnl1
Dusp10	7.61002e-14	0.407858	0.306	0.182	1.51447e-09	2	Dusp10
Stk17b	1.10582e-13	0.251227	0.872	0.821	2.20068e-09	2	Stk17b
Rpl13a	1.2135e-13	0.296394	0.551	0.437	2.41499e-09	2	Rpl13a
Selenop	1.23505e-13	0.28262	0.363	0.242	2.45788e-09	2	Selenop
Cnp	1.24633e-13	0.320176	0.466	0.335	2.48033e-09	2	Cnp
Tox	1.71547e-13	0.290314	0.485	0.367	3.41395e-09	2	Tox
Clec2i	2.16068e-13	0.265748	0.133	0.038	4.29996e-09	2	Clec2i
Macf1	2.75345e-13	0.30619	0.522	0.397	5.47965e-09	2	Macf1
Dnajb6	9.62977e-13	0.312397	0.66	0.568	1.91642e-08	2	Dnajb6
Zfp36l2	9.86644e-13	0.357805	0.616	0.512	1.96352e-08	2	Zfp36l2
Cdc25b1	1.13944e-12	0.287864	0.219	0.113	2.2676e-08	2	Cdc25b
Gm8696	1.18388e-12	0.379121	0.119	0.032	2.35604e-08	2	Gm8696
Coq10b	1.41573e-12	0.329305	0.274	0.154	2.81745e-08	2	Coq10b
Clint1	1.63798e-12	0.28959	0.489	0.383	3.25975e-08	2	Clint1
Zc3hav1	2.38007e-12	0.28747	0.703	0.602	4.73658e-08	2	Zc3hav1
Gm4759	2.47118e-12	0.317312	0.498	0.385	4.9179e-08	2	Gm4759
Utrn	4.91953e-12	0.266636	0.326	0.19	9.79036e-08	2	Utrn
Cldnd1	7.48872e-12	0.375561	0.418	0.288	1.49033e-07	2	Cldnd1
Junb	8.93427e-12	0.306439	0.862	0.815	1.77801e-07	2	Junb
Gm12840	2.29334e-11	0.33042	0.248	0.142	4.56398e-07	2	Gm12840
Sla	3.61981e-11	0.256784	0.636	0.53	7.20379e-07	2	Sla
Asxl2	4.07447e-11	0.300325	0.381	0.261	8.1086e-07	2	Asxl2
Retreg1	5.59655e-11	0.290615	0.499	0.395	1.11377e-06	2	Retreg1
Cnot6l	7.44505e-11	0.285676	0.551	0.439	1.48164e-06	2	Cnot6l
Prrc2c	7.89029e-11	0.251811	0.812	0.751	1.57025e-06	2	Prrc2c
Slfn2	1.05273e-10	0.260713	0.597	0.497	2.09504e-06	2	Slfn2
Fryl	1.08101e-10	0.253613	0.269	0.163	2.15133e-06	2	Fryl
Gbp2	2.3878e-10	0.308574	0.251	0.164	4.75197e-06	2	Gbp2
Cenpa1	4.37491e-10	0.256033	0.471	0.354	8.70651e-06	2	Cenpa
Stk4	4.93169e-10	0.320164	0.501	0.396	9.81455e-06	2	Stk4
Trp53inp1	6.375e-10	0.279406	0.524	0.381	1.26869e-05	2	Trp53inp1
Hipk2	6.68343e-10	0.270092	0.223	0.108	1.33007e-05	2	Hipk2
Pik3r1	1.05975e-09	0.311817	0.46	0.339	2.10901e-05	2	Pik3r1
Ifit1	2.35154e-09	0.279196	0.196	0.101	4.67981e-05	2	Ifit1
Saraf	5.08015e-09	0.286659	0.513	0.385	0.0001011	2	Saraf
Rtp4	9.93762e-09	0.255256	0.409	0.288	0.000197768	2	Rtp4
Socs3	1.08852e-08	0.353403	0.276	0.169	0.000216627	2	Socs3
Dgat1	1.40535e-08	0.328199	0.401	0.307	0.000279678	2	Dgat1
S100a4	1.46125e-08	0.349182	0.792	0.799	0.000290804	2	S100a4
Aplp2	1.84745e-08	0.283654	0.341	0.242	0.000367661	2	Aplp2
Arid4b	1.92493e-08	0.25921	0.588	0.492	0.000383081	2	Arid4b
Ppp1r15a	3.35074e-08	0.289708	0.565	0.509	0.000666831	2	Ppp1r15a
Tkt1	4.16301e-08	0.295286	0.579	0.492	0.000828481	2	Tkt
Irf2bp2	6.07882e-08	0.296522	0.482	0.384	0.00120975	2	Irf2bp2
Arid4a	8.23079e-08	0.275626	0.545	0.446	0.00163801	2	Arid4a
Gm26825	1.871e-07	0.458961	0.495	0.422	0.00372348	2	Gm26825
Neurl3	1.04598e-06	0.377074	0.368	0.26	0.0208161	2	Neurl3
Smc6	2.01398e-06	0.263059	0.646	0.601	0.0400802	2	Smc6
Phlpp1	7.82085e-06	0.265976	0.214	0.139	0.155643	2	Phlpp1
Hspa1a	4.0794e-05	0.274224	0.625	0.574	0.811842	2	Hspa1a
Matk	7.05724e-05	0.257558	0.265	0.183	1	2	Matk
Isg15	8.67227e-05	0.319469	0.424	0.382	1	2	Isg15
Hspa1b	0.000189307	0.25919	0.626	0.576	1	2	Hspa1b
Gbp2b	0.00021071	0.265626	0.289	0.239	1	2	Gbp2b
Ccr7	0.00338258	0.38936	0.212	0.168	1	2	Ccr7
Eif4a11	2.94292e-115	0.861726	0.979	0.661	5.85671e-111	3	Eif4a1
Nme11	2.29652e-109	0.847358	0.935	0.456	4.57031e-105	3	Nme1
Eif5a1	4.14599e-91	0.745739	0.992	0.821	8.25094e-87	3	Eif5a
Npm11	5.80099e-87	0.793446	0.993	0.847	1.15445e-82	3	Npm1
Rps21	1.14397e-85	0.671716	0.999	0.921	2.27661e-81	3	Rps2
Nhp21	1.65856e-85	0.724589	0.677	0.21	3.3007e-81	3	Nhp2
Rps81	1.15867e-83	0.469471	1	0.986	2.30587e-79	3	Rps8
C1qbp1	2.25396e-83	0.776949	0.706	0.214	4.48561e-79	3	C1qbp
Rps261	1.13365e-79	0.500246	1	0.961	2.25607e-75	3	Rps26
Fbl1	3.67232e-78	0.71588	0.727	0.266	7.30829e-74	3	Fbl
Mif1	4.26216e-76	0.653181	0.975	0.714	8.48212e-72	3	Mif
Rpl81	6.58697e-76	0.412786	1	0.973	1.31087e-71	3	Rpl8
Psme2	8.2484e-76	0.581389	0.985	0.817	1.64152e-71	3	Psme2
Ppp1r14b1	3.44204e-75	0.697617	0.82	0.362	6.85e-71	3	Ppp1r14b
Ranbp11	3.21935e-74	0.683104	0.88	0.428	6.40683e-70	3	Ranbp1
Atp5g11	3.60512e-74	0.632432	0.88	0.459	7.17455e-70	3	Atp5g1
Ran1	3.89455e-72	0.577137	0.981	0.715	7.75054e-68	3	Ran
Gar11	1.01613e-71	0.574808	0.564	0.145	2.0222e-67	3	Gar1
Serbp11	8.92512e-71	0.552831	0.993	0.812	1.77619e-66	3	Serbp1
Rps171	5.1416e-68	0.581809	0.975	0.78	1.02323e-63	3	Rps17
Cct31	1.66616e-67	0.585463	0.767	0.346	3.31583e-63	3	Cct3
Ptma1	1.82116e-67	0.358514	1	0.988	3.6243e-63	3	Ptma
Pa2g41	2.60038e-65	0.646984	0.704	0.284	5.17501e-61	3	Pa2g4
Cycs1	1.31272e-64	0.567018	0.931	0.603	2.61244e-60	3	Cycs
Hspe1	4.18606e-63	0.582051	0.954	0.661	8.33068e-59	3	Hspe1
Snrpd31	7.80468e-63	0.523969	0.782	0.349	1.55321e-58	3	Snrpd3
Ppia1	1.0084e-61	0.338645	1	0.987	2.00682e-57	3	Ppia
Mrto41	1.01942e-61	0.515954	0.528	0.15	2.02874e-57	3	Mrto4
Ppa11	2.69642e-61	0.602752	0.722	0.295	5.36614e-57	3	Ppa1
Cct51	7.02774e-61	0.59132	0.847	0.462	1.39859e-56	3	Cct5
Ctsz	7.82945e-61	0.684472	0.899	0.593	1.55814e-56	3	Ctsz
Pfn1	2.15832e-58	0.337502	1	0.984	4.29527e-54	3	Pfn1
Rps27a	2.52e-56	0.312065	1	0.988	5.01505e-52	3	Rps27a
Atp5b1	6.84312e-56	0.464614	0.963	0.762	1.36185e-51	3	Atp5b
Set1	1.04545e-55	0.571644	0.953	0.635	2.08055e-51	3	Set
Nop581	8.36215e-55	0.631617	0.655	0.239	1.66415e-50	3	Nop58
Rps3a12	1.18042e-54	0.359243	1	0.983	2.34916e-50	3	Rps3a1
Pebp11	2.17485e-53	0.476309	0.885	0.518	4.32818e-49	3	Pebp1
Prmt11	2.43027e-53	0.520417	0.718	0.306	4.83648e-49	3	Prmt1
Hspa91	2.86146e-53	0.487273	0.59	0.197	5.69459e-49	3	Hspa9
Cct81	5.91531e-53	0.56506	0.887	0.514	1.1772e-48	3	Cct8
Rpl33	2.88651e-52	0.338374	0.999	0.976	5.74444e-48	3	Rpl3
Ncl1	3.59613e-52	0.707655	0.928	0.678	7.15666e-48	3	Ncl
Hspd11	9.74788e-52	0.522584	0.833	0.46	1.93993e-47	3	Hspd1
Slc25a51	1.10151e-51	0.470302	0.954	0.711	2.19212e-47	3	Slc25a5
Ddx21	1.30811e-51	0.547408	0.733	0.339	2.60328e-47	3	Ddx21
Cnbp	2.0504e-51	0.390545	0.981	0.84	4.0805e-47	3	Cnbp
Rpl321	2.80872e-51	0.308859	1	0.992	5.58963e-47	3	Rpl32
Phb21	2.91731e-51	0.516792	0.78	0.415	5.80574e-47	3	Phb2
Rpl282	3.69651e-51	0.430119	1	0.947	7.35642e-47	3	Rpl28
Cct6a1	3.85184e-51	0.52326	0.771	0.384	7.66556e-47	3	Cct6a
Hsp90ab1	4.90247e-51	0.403664	1	0.956	9.75641e-47	3	Hsp90ab1
Calr	9.82369e-51	0.460832	0.981	0.823	1.95501e-46	3	Calr
Ybx11	1.0376e-50	0.479309	0.975	0.77	2.06493e-46	3	Ybx1
Eef1g1	3.02658e-50	0.468769	0.921	0.658	6.02319e-46	3	Eef1g
Rps121	5.32234e-50	0.345137	1	0.987	1.0592e-45	3	Rps12
Phb	7.12358e-50	0.490693	0.591	0.212	1.41766e-45	3	Phb
Rpl352	1.24149e-49	0.435388	0.997	0.913	2.47069e-45	3	Rpl35
Eef1e1	3.60377e-49	0.427137	0.461	0.147	7.17186e-45	3	Eef1e1
Nolc11	6.92472e-49	0.514809	0.45	0.134	1.37809e-44	3	Nolc1
Timm13	5.65877e-48	0.400382	0.84	0.509	1.12615e-43	3	Timm13
Ebna1bp2	1.64325e-47	0.431797	0.619	0.269	3.27024e-43	3	Ebna1bp2
Rps201	7.2607e-47	0.336549	0.999	0.982	1.44495e-42	3	Rps20
Apex1	8.89209e-47	0.417738	0.34	0.071	1.76962e-42	3	Apex1
Rsl1d11	2.17183e-46	0.481168	0.678	0.303	4.32215e-42	3	Rsl1d1
Nsun2	1.13153e-45	0.449189	0.486	0.16	2.25187e-41	3	Nsun2
Atp5e	1.87991e-45	0.331942	0.996	0.932	3.7412e-41	3	Atp5e
Wdr43	4.12811e-45	0.444914	0.514	0.187	8.21534e-41	3	Wdr43
Rps251	5.59885e-45	0.411952	0.983	0.87	1.11423e-40	3	Rps25
Snrpa11	7.23045e-45	0.40816	0.67	0.309	1.43893e-40	3	Snrpa1
Hspa5	1.45514e-44	0.443749	0.961	0.761	2.89588e-40	3	Hspa5
Ybx31	2.09811e-44	0.533008	0.591	0.238	4.17545e-40	3	Ybx3
Nop16	2.75709e-44	0.440448	0.344	0.071	5.48689e-40	3	Nop16
Eif3b1	3.74009e-44	0.430632	0.586	0.236	7.44315e-40	3	Eif3b
Snrpf1	4.27288e-44	0.442635	0.865	0.528	8.50347e-40	3	Snrpf
Cct21	4.2941e-44	0.455105	0.89	0.581	8.5457e-40	3	Cct2
Mrpl121	8.4809e-44	0.455706	0.593	0.238	1.68778e-39	3	Mrpl12
Fabp51	1.39755e-43	0.541042	0.869	0.517	2.78127e-39	3	Fabp5
Srm	1.79958e-43	0.41884	0.304	0.057	3.58134e-39	3	Srm
Lsm7	4.10576e-43	0.407292	0.569	0.221	8.17088e-39	3	Lsm7
Rps27l1	8.8782e-43	0.435511	0.88	0.537	1.76685e-38	3	Rps27l
Mybbp1a	1.01319e-42	0.394978	0.378	0.098	2.01635e-38	3	Mybbp1a
Il1r2	1.30666e-42	0.758148	0.517	0.215	2.60038e-38	3	Il1r2
Emc6	5.53525e-42	0.382893	0.622	0.278	1.10157e-37	3	Emc6
Eno31	7.49234e-42	0.577676	0.461	0.173	1.49105e-37	3	Eno3
Bola2	1.76559e-41	0.420236	0.771	0.426	3.5137e-37	3	Bola2
Polr2l1	2.18022e-41	0.426058	0.7	0.329	4.33886e-37	3	Polr2l
Eif2s11	3.62724e-41	0.428262	0.764	0.405	7.21858e-37	3	Eif2s1
Rpl12	3.85313e-41	0.279081	0.997	0.98	7.66812e-37	3	Rpl12
Nop561	3.90452e-41	0.487556	0.537	0.191	7.77039e-37	3	Nop56
Rpsa1	4.49668e-41	0.329209	1	0.991	8.94885e-37	3	Rpsa
Psma71	5.06379e-41	0.380572	0.953	0.721	1.00774e-36	3	Psma7
Hnrnpa11	1.38291e-40	0.479605	0.869	0.542	2.75214e-36	3	Hnrnpa1
Gtpbp4	3.49593e-40	0.486405	0.58	0.239	6.95725e-36	3	Gtpbp4
Rbm31	6.83657e-40	0.306012	0.996	0.933	1.36055e-35	3	Rbm3
Dad1	6.99279e-40	0.332324	0.948	0.72	1.39163e-35	3	Dad1
Npm31	8.93427e-40	0.433566	0.575	0.234	1.77801e-35	3	Npm3
Rpl13	1.15898e-39	0.279651	1	0.988	2.30648e-35	3	Rpl13
Ndufa41	1.23758e-39	0.394963	0.941	0.718	2.4629e-35	3	Ndufa4
Rpl141	1.2522e-39	0.328244	0.996	0.961	2.49201e-35	3	Rpl14
Denr	1.76214e-39	0.423353	0.797	0.466	3.50684e-35	3	Denr
Rps182	2.19652e-39	0.325739	0.996	0.957	4.3713e-35	3	Rps18
Rps191	2.94461e-39	0.295535	1	0.971	5.86007e-35	3	Rps19
Rpl101	4.04382e-39	0.321192	0.999	0.939	8.04761e-35	3	Rpl10
G3bp11	1.05366e-38	0.420231	0.798	0.451	2.09689e-34	3	G3bp1
Slc25a3	1.22317e-38	0.345121	0.972	0.802	2.43424e-34	3	Slc25a3
Lap3	1.59224e-38	0.374247	0.362	0.095	3.16872e-34	3	Lap3
Psme1	1.88678e-38	0.340163	0.977	0.857	3.75487e-34	3	Psme1
Rpl10a1	2.07779e-38	0.335666	0.994	0.933	4.135e-34	3	Rpl10a
Cox5a1	3.76662e-38	0.379451	0.959	0.733	7.49596e-34	3	Cox5a
Ppan	6.94231e-38	0.394353	0.309	0.065	1.38159e-33	3	Ppan
Erdr11	9.13697e-38	0.399613	0.837	0.51	1.81835e-33	3	Erdr1
Cct71	1.41366e-37	0.402501	0.837	0.504	2.81333e-33	3	Cct7
Nip7	1.93462e-37	0.341295	0.463	0.176	3.85009e-33	3	Nip7
Cd200	4.56808e-37	0.424322	0.515	0.205	9.09094e-33	3	Cd200
Mrps28	1.50737e-36	0.37371	0.409	0.126	2.99983e-32	3	Mrps28
Dkc11	1.72967e-36	0.377805	0.39	0.127	3.44222e-32	3	Dkc1
Llph	2.12669e-36	0.33064	0.74	0.422	4.23233e-32	3	Llph
Hnrnpab1	3.22339e-36	0.394344	0.819	0.453	6.41488e-32	3	Hnrnpab
Rpl411	3.52965e-36	0.262501	1	0.994	7.02435e-32	3	Rpl41
Pno1	9.35927e-36	0.353825	0.355	0.105	1.86259e-31	3	Pno1
Ssr41	1.0561e-35	0.36454	0.932	0.673	2.10175e-31	3	Ssr4
Erh1	1.57535e-35	0.380599	0.681	0.329	3.1351e-31	3	Erh
Ndufab11	2.44386e-35	0.378219	0.696	0.367	4.86352e-31	3	Ndufab1
Ruvbl1	4.08492e-35	0.359971	0.477	0.171	8.12939e-31	3	Ruvbl1
Noc2l	4.56374e-35	0.34625	0.384	0.119	9.0823e-31	3	Noc2l
Lyar1	9.04347e-35	0.407737	0.522	0.221	1.79974e-30	3	Lyar
Zfp593	1.53448e-34	0.333169	0.376	0.124	3.05378e-30	3	Zfp593
Mrpl171	2.24272e-34	0.336634	0.535	0.239	4.46324e-30	3	Mrpl17
Uqcrq1	2.59129e-34	0.355398	0.93	0.685	5.15693e-30	3	Uqcrq
Ddx391	2.70006e-34	0.376165	0.633	0.295	5.37339e-30	3	Ddx39
Impdh21	3.18959e-34	0.411348	0.521	0.19	6.3476e-30	3	Impdh2
Rpl311	3.54235e-34	0.410398	0.953	0.715	7.04963e-30	3	Rpl31
Uchl31	4.0746e-34	0.306	0.507	0.216	8.10885e-30	3	Uchl3
Tnfrsf41	4.34155e-34	0.454563	0.983	0.943	8.64013e-30	3	Tnfrsf4
Bccip	6.51326e-34	0.280706	0.573	0.279	1.2962e-29	3	Bccip
Snrpd11	1.03102e-33	0.401468	0.773	0.407	2.05183e-29	3	Snrpd1
Cox7b	1.37052e-33	0.342809	0.959	0.776	2.72747e-29	3	Cox7b
Eif3c1	1.49553e-33	0.333096	0.82	0.544	2.97625e-29	3	Eif3c
St13	5.41682e-33	0.422617	0.837	0.491	1.078e-28	3	St13
Uqcc21	5.98868e-33	0.352039	0.7	0.373	1.19181e-28	3	Uqcc2
Ddx18	7.3482e-33	0.315466	0.483	0.198	1.46236e-28	3	Ddx18
Txn2	8.17166e-33	0.348014	0.631	0.318	1.62624e-28	3	Txn2
2010107E04Rik	1.82654e-32	0.346182	0.96	0.764	3.63499e-28	3	2010107E04Rik
Phgdh1	2.03386e-32	0.405203	0.59	0.257	4.04758e-28	3	Phgdh
Mpp61	2.07722e-32	0.349293	0.461	0.187	4.13388e-28	3	Mpp6
Rplp02	2.58445e-32	0.290895	0.997	0.967	5.14331e-28	3	Rplp0
Bcl2l1	2.82765e-32	0.353909	0.519	0.235	5.62731e-28	3	Bcl2l1
Pdia61	4.04467e-32	0.436945	0.834	0.537	8.04931e-28	3	Pdia6
Cd81	4.40375e-32	0.579506	0.833	0.584	8.76391e-28	3	Cd81
Eif3g	5.00635e-32	0.301836	0.63	0.328	9.96314e-28	3	Eif3g
Gm10039	5.58482e-32	0.301077	0.448	0.174	1.11144e-27	3	Gm10039
Snhg1	5.921e-32	0.381218	0.609	0.283	1.17834e-27	3	Snhg1
Rps61	7.98984e-32	0.328195	0.99	0.871	1.59006e-27	3	Rps6
Tomm5	1.06549e-31	0.477299	0.698	0.385	2.12042e-27	3	Tomm5
Nifk	1.28582e-31	0.311831	0.337	0.106	2.5589e-27	3	Nifk
Glrx3	2.06701e-31	0.316158	0.673	0.348	4.11356e-27	3	Glrx3
Atic	2.28862e-31	0.290844	0.417	0.148	4.55458e-27	3	Atic
Taf10	2.84248e-31	0.333163	0.896	0.626	5.65681e-27	3	Taf10
Rpl42	3.25474e-31	0.304102	0.996	0.907	6.47726e-27	3	Rpl4
Chchd11	3.58747e-31	0.293804	0.601	0.311	7.13942e-27	3	Chchd1
Rpl7a	3.98098e-31	0.280196	0.993	0.941	7.92254e-27	3	Rpl7a
Cct41	4.14499e-31	0.375336	0.743	0.433	8.24894e-27	3	Cct4
Rrp15	4.23091e-31	0.314457	0.285	0.068	8.41994e-27	3	Rrp15
Psma41	7.67605e-31	0.346864	0.905	0.633	1.52761e-26	3	Psma4
Ddx27	7.7805e-31	0.320371	0.474	0.197	1.5484e-26	3	Ddx27
Gnl3	1.30171e-30	0.346315	0.314	0.098	2.59053e-26	3	Gnl3
Rpl36a1	1.5992e-30	0.310135	0.99	0.934	3.18256e-26	3	Rpl36a
Rpl7l1	2.8368e-30	0.28914	0.494	0.225	5.64551e-26	3	Rpl7l1
Eef1d	2.91906e-30	0.314679	0.945	0.717	5.80922e-26	3	Eef1d
Eprs1	3.17371e-30	0.309762	0.474	0.21	6.31599e-26	3	Eprs
Stoml2	3.26327e-30	0.309542	0.497	0.219	6.49423e-26	3	Stoml2
Timm10	3.4387e-30	0.286252	0.3	0.081	6.84336e-26	3	Timm10
Mettl1	3.59247e-30	0.296069	0.222	0.037	7.14937e-26	3	Mettl1
Psmb51	3.63807e-30	0.352959	0.802	0.495	7.24012e-26	3	Psmb5
Snrpa2	3.8487e-30	0.313468	0.483	0.206	7.65929e-26	3	Snrpa
Ldha1	3.85814e-30	0.301773	0.99	0.88	7.67809e-26	3	Ldha
Pkm1	4.1751e-30	0.296862	0.994	0.899	8.30888e-26	3	Pkm
Btf3	4.38713e-30	0.272858	0.99	0.914	8.73083e-26	3	Btf3
Rrp9	5.45244e-30	0.284453	0.267	0.066	1.08509e-25	3	Rrp9
Anp32b1	7.11759e-30	0.322369	0.956	0.729	1.41647e-25	3	Anp32b
Eif2s21	1.27013e-29	0.370249	0.82	0.547	2.52768e-25	3	Eif2s2
Eif1ax1	1.34615e-29	0.341991	0.775	0.451	2.67897e-25	3	Eif1ax
Galk11	1.8701e-29	0.30744	0.45	0.185	3.72169e-25	3	Galk1
Rpl151	2.14665e-29	0.365704	0.952	0.75	4.27205e-25	3	Rpl15
Rps15	2.2753e-29	0.250211	0.999	0.974	4.52807e-25	3	Rps15
Psmb21	3.05644e-29	0.341819	0.869	0.558	6.08261e-25	3	Psmb2
Fubp1	3.76128e-29	0.318	0.747	0.432	7.48532e-25	3	Fubp1
Strap1	7.16792e-29	0.35574	0.727	0.386	1.42649e-24	3	Strap
Tcp11	7.55298e-29	0.368818	0.76	0.411	1.50312e-24	3	Tcp1
Gadd45b	8.72751e-29	0.403558	0.808	0.516	1.73686e-24	3	Gadd45b
Gspt11	9.07195e-29	0.300885	0.548	0.252	1.80541e-24	3	Gspt1
Psma61	1.0335e-28	0.350555	0.797	0.494	2.05676e-24	3	Psma6
Eif1a	1.09322e-28	0.341447	0.624	0.319	2.17562e-24	3	Eif1a
Banf11	1.88699e-28	0.370118	0.659	0.333	3.7553e-24	3	Banf1
Eif3i1	1.98294e-28	0.356296	0.815	0.528	3.94624e-24	3	Eif3i
Fkbp4	1.99704e-28	0.326778	0.569	0.26	3.97431e-24	3	Fkbp4
Tmem147	2.82402e-28	0.28808	0.409	0.155	5.62008e-24	3	Tmem147
Ergic1	3.39765e-28	0.27125	0.407	0.16	6.76166e-24	3	Ergic1
Atp5a11	6.14957e-28	0.317067	0.914	0.666	1.22383e-23	3	Atp5a1
Uqcr101	7.12601e-28	0.319968	0.89	0.652	1.41815e-23	3	Uqcr10
Gm87302	9.42792e-28	0.287207	0.99	0.895	1.87625e-23	3	Gm8730
Gcsh	9.49905e-28	0.271702	0.275	0.077	1.89041e-23	3	Gcsh
Glrx5	9.80751e-28	0.274101	0.594	0.318	1.95179e-23	3	Glrx5
Psmc5	1.15618e-27	0.285827	0.725	0.417	2.30092e-23	3	Psmc5
Timm8a1	1.32439e-27	0.336271	0.32	0.091	2.63567e-23	3	Timm8a1
Romo1	1.54934e-27	0.278249	0.666	0.367	3.08335e-23	3	Romo1
Snrpd21	2.10744e-27	0.349934	0.849	0.545	4.19401e-23	3	Snrpd2
Polr2f	2.15138e-27	0.312833	0.707	0.388	4.28146e-23	3	Polr2f
Hnrnpa31	3.10241e-27	0.277257	0.936	0.742	6.17411e-23	3	Hnrnpa3
Srsf21	3.42753e-27	0.370004	0.858	0.528	6.82112e-23	3	Srsf2
Snrpb1	3.45932e-27	0.334241	0.899	0.599	6.88439e-23	3	Snrpb
Chchd2	4.8432e-27	0.269279	0.983	0.9	9.63845e-23	3	Chchd2
Wdr18	5.08e-27	0.260177	0.326	0.112	1.01097e-22	3	Wdr18
Mdh2	5.3328e-27	0.288698	0.912	0.658	1.06128e-22	3	Mdh2
Usmg5	7.41882e-27	0.307194	0.914	0.66	1.47642e-22	3	Usmg5
Tomm40	7.69284e-27	0.340528	0.443	0.185	1.53095e-22	3	Tomm40
Rwdd1	9.34961e-27	0.274602	0.851	0.578	1.86067e-22	3	Rwdd1
Pcbp11	1.43734e-26	0.266814	0.823	0.531	2.86046e-22	3	Pcbp1
Psma21	1.47257e-26	0.290673	0.943	0.771	2.93056e-22	3	Psma2
Uqcr11	1.69246e-26	0.299783	0.845	0.586	3.36817e-22	3	Uqcr11
Minos11	1.84075e-26	0.273424	0.953	0.755	3.66328e-22	3	Minos1
Canx1	2.2824e-26	0.296566	0.778	0.465	4.5422e-22	3	Canx
2210016F16Rik	2.5294e-26	0.260867	0.622	0.349	5.03376e-22	3	2210016F16Rik
Bmyc	2.61073e-26	0.456615	0.735	0.474	5.19562e-22	3	Bmyc
Mrpl36	2.91407e-26	0.263778	0.528	0.265	5.79929e-22	3	Mrpl36
Cops6	3.31998e-26	0.304087	0.703	0.384	6.6071e-22	3	Cops6
Mrpl15	3.78427e-26	0.291989	0.546	0.256	7.53107e-22	3	Mrpl15
Ndufc21	4.28747e-26	0.29166	0.74	0.455	8.5325e-22	3	Ndufc2
Cdk41	8.11389e-26	0.322582	0.507	0.219	1.61474e-21	3	Cdk4
Eif5b	1.31641e-25	0.391913	0.776	0.441	2.61979e-21	3	Eif5b
Ssb1	1.42299e-25	0.316149	0.892	0.645	2.83189e-21	3	Ssb
Cyba	2.88082e-25	0.259919	0.992	0.909	5.73313e-21	3	Cyba
Psmg4	3.11294e-25	0.286298	0.535	0.252	6.19507e-21	3	Psmg4
Naa10	3.25482e-25	0.309306	0.746	0.435	6.47742e-21	3	Naa10
Ltv1	3.25645e-25	0.265235	0.29	0.091	6.48066e-21	3	Ltv1
Dnajc21	3.27105e-25	0.289529	0.666	0.371	6.50972e-21	3	Dnajc2
Ndufa51	4.55923e-25	0.279661	0.717	0.412	9.07333e-21	3	Ndufa5
Rabggtb	5.37699e-25	0.275962	0.463	0.219	1.07008e-20	3	Rabggtb
U2af11	6.366e-25	0.290337	0.711	0.414	1.2669e-20	3	U2af1
Hsd17b12	7.69212e-25	0.283832	0.446	0.181	1.53081e-20	3	Hsd17b12
Gart	7.7553e-25	0.256711	0.298	0.094	1.54338e-20	3	Gart
Dctpp11	8.6288e-25	0.346438	0.622	0.316	1.71722e-20	3	Dctpp1
Snu131	9.43342e-25	0.351907	0.743	0.43	1.87734e-20	3	Snu13
Batf	1.05665e-24	0.436381	0.739	0.466	2.10284e-20	3	Batf
Pdap11	1.32071e-24	0.287787	0.669	0.364	2.62835e-20	3	Pdap1
Rcl1	1.41092e-24	0.255299	0.236	0.058	2.80786e-20	3	Rcl1
AI662270	1.50268e-24	0.258745	0.771	0.492	2.99048e-20	3	AI662270
Ftsj3	1.53889e-24	0.295438	0.283	0.086	3.06255e-20	3	Ftsj3
Psmb31	1.5585e-24	0.26434	0.93	0.709	3.10156e-20	3	Psmb3
Irf8	1.58445e-24	0.353511	0.594	0.326	3.15322e-20	3	Irf8
Rcc21	1.90773e-24	0.307485	0.42	0.175	3.79657e-20	3	Rcc2
Gm102601	2.70541e-24	0.296503	0.963	0.832	5.38404e-20	3	Gm10260
Suclg1	2.85492e-24	0.266186	0.599	0.315	5.68158e-20	3	Suclg1
Eif4e	3.03772e-24	0.272739	0.646	0.371	6.04536e-20	3	Eif4e
Psma3	3.71592e-24	0.293375	0.936	0.716	7.39505e-20	3	Psma3
Psmd7	4.01711e-24	0.274315	0.642	0.363	7.99444e-20	3	Psmd7
Atp5g31	4.19024e-24	0.331869	0.892	0.619	8.339e-20	3	Atp5g3
Mphosph10	4.43595e-24	0.252302	0.385	0.163	8.82799e-20	3	Mphosph10
Nudc1	5.9166e-24	0.306697	0.691	0.383	1.17746e-19	3	Nudc
Wdr83os	5.98455e-24	0.308933	0.628	0.341	1.19098e-19	3	Wdr83os
Ndufb61	6.02696e-24	0.312922	0.685	0.384	1.19942e-19	3	Ndufb6
Pomp1	6.36379e-24	0.299587	0.925	0.7	1.26646e-19	3	Pomp
Cacybp	6.63702e-24	0.261707	0.772	0.487	1.32083e-19	3	Cacybp
Odc1	6.84726e-24	0.31846	0.68	0.405	1.36267e-19	3	Odc1
Pum3	7.27931e-24	0.258391	0.32	0.116	1.44865e-19	3	Pum3
Rpn11	7.52287e-24	0.261454	0.452	0.194	1.49713e-19	3	Rpn1
Wdr12	7.70926e-24	0.263582	0.286	0.093	1.53422e-19	3	Wdr12
Sumo21	8.92367e-24	0.250101	0.981	0.878	1.7759e-19	3	Sumo2
Prdx11	1.0379e-23	0.312447	0.957	0.754	2.06552e-19	3	Prdx1
Bcl2a1d	1.19991e-23	0.368265	0.511	0.261	2.38794e-19	3	Bcl2a1d
Rpl35a	1.26161e-23	0.260551	0.977	0.824	2.51073e-19	3	Rpl35a
Psme3	1.4336e-23	0.251854	0.362	0.148	2.85301e-19	3	Psme3
Ndufb2	1.94236e-23	0.263961	0.637	0.343	3.86549e-19	3	Ndufb2
Ppid	3.15767e-23	0.277637	0.414	0.181	6.28409e-19	3	Ppid
Eef1b2	5.53687e-23	0.269128	0.989	0.926	1.10189e-18	3	Eef1b2
Utp18	6.09382e-23	0.254144	0.383	0.15	1.21273e-18	3	Utp18
Srsf61	1.2762e-22	0.26154	0.544	0.274	2.53976e-18	3	Srsf6
Rpf2	1.47681e-22	0.2676	0.315	0.113	2.939e-18	3	Rpf2
Edf1	1.48496e-22	0.277808	0.935	0.731	2.95521e-18	3	Edf1
Nop10	1.54785e-22	0.328352	0.682	0.422	3.08038e-18	3	Nop10
Eif3d	5.49335e-22	0.274317	0.684	0.408	1.09323e-17	3	Eif3d
Nfkbib	5.95801e-22	0.265198	0.523	0.268	1.1857e-17	3	Nfkbib
Rpl36al	6.4542e-22	0.300108	0.874	0.618	1.28445e-17	3	Rpl36al
Erg281	6.97677e-22	0.275988	0.536	0.277	1.38845e-17	3	Erg28
Rpl22l1	7.28495e-22	0.257071	0.975	0.834	1.44978e-17	3	Rpl22l1
Mrpl421	8.22385e-22	0.2597	0.622	0.322	1.63663e-17	3	Mrpl42
Atp5j1	1.35788e-21	0.264237	0.942	0.733	2.70231e-17	3	Atp5j
Phpt1	1.52027e-21	0.2576	0.49	0.247	3.02549e-17	3	Phpt1
Psmb41	1.55537e-21	0.285177	0.849	0.57	3.09535e-17	3	Psmb4
Cyc11	1.90557e-21	0.281474	0.604	0.328	3.79227e-17	3	Cyc1
Hmgn11	2.47025e-21	0.326418	0.383	0.167	4.91605e-17	3	Hmgn1
Syngr2	2.94479e-21	0.264737	0.678	0.436	5.86043e-17	3	Syngr2
Aprt	3.73111e-21	0.268227	0.798	0.516	7.42528e-17	3	Aprt
Hspa4	4.63157e-21	0.261755	0.623	0.356	9.21729e-17	3	Hspa4
Sssca1	5.45073e-21	0.256077	0.311	0.126	1.08475e-16	3	Sssca1
Pfdn4	5.58039e-21	0.252302	0.434	0.204	1.11055e-16	3	Pfdn4
Magoh1	5.78893e-21	0.276263	0.762	0.45	1.15205e-16	3	Magoh
Ciapin1	6.15018e-21	0.260624	0.698	0.416	1.22395e-16	3	Ciapin1
Map2k3	8.8015e-21	0.285615	0.66	0.382	1.75159e-16	3	Map2k3
Bcl2a1b	8.86003e-21	0.333567	0.793	0.545	1.76324e-16	3	Bcl2a1b
Cd82	1.3508e-20	0.332177	0.765	0.527	2.68822e-16	3	Cd82
Psma51	2.97068e-20	0.266109	0.772	0.48	5.91195e-16	3	Psma5
Psma11	3.01343e-20	0.257466	0.796	0.522	5.99704e-16	3	Psma1
Psmb61	4.33831e-20	0.270649	0.775	0.491	8.63368e-16	3	Psmb6
Ndufc11	4.5046e-20	0.288582	0.673	0.387	8.96461e-16	3	Ndufc1
Srsf71	1.38605e-19	0.311986	0.648	0.345	2.75838e-15	3	Srsf7
Gm93471	3.89244e-19	0.257726	0.385	0.167	7.74634e-15	3	Gm9347
Bcap29	3.94693e-19	0.276231	0.521	0.254	7.85478e-15	3	Bcap29
Pop5	4.76802e-19	0.290018	0.584	0.296	9.48883e-15	3	Pop5
Ahsa1	5.54173e-19	0.285741	0.695	0.42	1.10286e-14	3	Ahsa1
Hnrnpd1	7.6574e-19	0.255694	0.866	0.584	1.5239e-14	3	Hnrnpd
Atp5k1	8.20164e-19	0.251874	0.876	0.635	1.63221e-14	3	Atp5k
Stat5a	1.0107e-18	0.260283	0.377	0.174	2.01139e-14	3	Stat5a
Sdf2l11	1.07744e-18	0.272235	0.496	0.264	2.1442e-14	3	Sdf2l1
Marcksl1	2.01831e-18	0.250414	0.203	0.067	4.01663e-14	3	Marcksl1
Rln3	3.12333e-18	0.425651	0.477	0.271	6.21573e-14	3	Rln3
Ostc	1.12537e-17	0.268382	0.794	0.528	2.23961e-13	3	Ostc
Ctps	1.72585e-17	0.250314	0.214	0.058	3.43462e-13	3	Ctps
Manf1	2.15981e-17	0.312736	0.847	0.591	4.29824e-13	3	Manf
Eif3a1	2.40987e-17	0.261671	0.768	0.481	4.79588e-13	3	Eif3a
Nfkb1	3.48522e-17	0.252234	0.612	0.368	6.93593e-13	3	Nfkb1
Prdx3	4.27991e-17	0.263819	0.45	0.222	8.51746e-13	3	Prdx3
M6pr1	6.71059e-17	0.261656	0.797	0.516	1.33547e-12	3	M6pr
Ssr21	1.81594e-16	0.253225	0.605	0.352	3.6139e-12	3	Ssr2
Ap3b1	4.06773e-16	0.361281	0.604	0.37	8.09518e-12	3	Ap3b1
Ccr71	2.31864e-15	0.423641	0.326	0.156	4.61432e-11	3	Ccr7
Penk	5.708e-13	0.877985	0.297	0.174	1.13595e-08	3	Penk
Dbi1	6.83144e-12	0.28078	0.702	0.452	1.35952e-07	3	Dbi
Ccl4	0.00790348	0.291741	0.37	0.307	1	3	Ccl4
mt-Rnr2	1.82886e-50	0.634672	0.996	0.999	3.63961e-46	4	mt-Rnr2
Gm42418	8.93687e-44	1.44423	0.958	0.989	1.77853e-39	4	Gm42418
Malat11	1.91212e-31	0.8636	0.992	0.999	3.80531e-27	4	Malat1
mt-Rnr11	2.08028e-19	0.650418	0.826	0.962	4.13996e-15	4	mt-Rnr1
Xist	1.26231e-11	0.639676	0.814	0.96	2.51212e-07	4	Xist
Smndc1	1.57671e-11	0.269876	0.117	0.365	3.13782e-07	4	Smndc1
Cd164	5.62341e-11	0.251142	0.178	0.496	1.11911e-06	4	Cd164
Nrd1	1.68483e-10	0.250984	0.133	0.385	3.35297e-06	4	Nrd1
Brd2	1.23699e-09	0.274688	0.159	0.431	2.46174e-05	4	Brd2
Wasf2	1.57982e-09	0.258299	0.178	0.489	3.14401e-05	4	Wasf2
Riok1	2.52681e-09	0.280942	0.083	0.284	5.0286e-05	4	Riok1
Ikzf2	2.53625e-09	0.62178	0.697	0.899	5.0474e-05	4	Ikzf2
Cnot6l1	2.79296e-09	0.27302	0.17	0.463	5.55827e-05	4	Cnot6l
Apbb1ip	5.51049e-09	0.303155	0.163	0.424	0.000109664	4	Apbb1ip
Cab39	1.19299e-08	0.303685	0.167	0.45	0.000237417	4	Cab39
Ccnd3	1.335e-08	0.256942	0.148	0.372	0.000265678	4	Ccnd3
Lbh	2.30399e-08	0.271679	0.242	0.552	0.000458516	4	Lbh
Tpst2	3.06579e-08	0.30424	0.159	0.388	0.000610124	4	Tpst2
Mapkapk2	4.0624e-08	0.274026	0.208	0.485	0.000808457	4	Mapkapk2
Pura	4.16846e-08	0.319002	0.186	0.46	0.000829565	4	Pura
R3hdm4	4.5628e-08	0.328436	0.155	0.39	0.000908043	4	R3hdm4
Il2rb	5.02665e-08	0.32623	0.25	0.553	0.00100035	4	Il2rb
Wapl	5.50779e-08	0.332441	0.182	0.446	0.0010961	4	Wapl
Itgal	1.28015e-07	0.252185	0.186	0.432	0.00254764	4	Itgal
Picalm	1.33437e-07	0.282158	0.231	0.552	0.00265554	4	Picalm
Arl4a	1.36088e-07	0.254232	0.155	0.389	0.00270828	4	Arl4a
Slc2a1	2.01393e-07	0.250057	0.133	0.351	0.00400792	4	Slc2a1
Rsbn1l	2.08542e-07	0.30433	0.25	0.568	0.00415019	4	Rsbn1l
Rbck1	2.18534e-07	0.256386	0.11	0.313	0.00434904	4	Rbck1
Wtap	2.3258e-07	0.30096	0.144	0.352	0.00462857	4	Wtap
Maf1	2.3617e-07	0.665879	0.689	0.843	0.00470002	4	Maf
Vgll4	3.01724e-07	0.306234	0.163	0.386	0.00600461	4	Vgll4
Saraf1	4.1954e-07	0.267454	0.163	0.409	0.00834926	4	Saraf
Gm2a	4.35453e-07	0.283004	0.288	0.613	0.00866595	4	Gm2a
Kpna4	4.83455e-07	0.275431	0.14	0.366	0.00962123	4	Kpna4
Dgat11	5.17839e-07	0.27669	0.14	0.324	0.0103055	4	Dgat1
Rnf125	5.20262e-07	0.293318	0.186	0.451	0.0103537	4	Rnf125
Ccnt1	6.05846e-07	0.25625	0.091	0.244	0.0120569	4	Ccnt1
Lrp10	6.80672e-07	0.282245	0.227	0.515	0.013546	4	Lrp10
Tmf1	6.90485e-07	0.286088	0.133	0.31	0.0137414	4	Tmf1
Usp25	7.82487e-07	0.328921	0.155	0.351	0.0155723	4	Usp25
Cd841	8.9952e-07	0.308852	0.17	0.376	0.0179013	4	Cd84
Fos1	9.30703e-07	0.390363	0.129	0.293	0.0185219	4	Fos
H1f0	1.12698e-06	0.253116	0.114	0.302	0.0224281	4	H1f0
Ythdc1	1.21385e-06	0.280891	0.193	0.432	0.0241569	4	Ythdc1
Rab1b	1.27521e-06	0.260559	0.129	0.328	0.025378	4	Rab1b
Rbl2	1.31252e-06	0.27003	0.163	0.384	0.0261204	4	Rbl2
Tbc1d10c	1.6063e-06	0.281385	0.25	0.559	0.031967	4	Tbc1d10c
Kansl1	1.68183e-06	0.259548	0.178	0.41	0.0334701	4	Kansl1
Cd44	1.81323e-06	0.26377	0.212	0.459	0.036085	4	Cd44
Ikzf41	1.85182e-06	0.280149	0.197	0.423	0.036853	4	Ikzf4
Tcf25	1.88529e-06	0.329507	0.269	0.615	0.0375192	4	Tcf25
Zbtb38	2.10276e-06	0.286376	0.193	0.416	0.041847	4	Zbtb38
Entpd1	2.17983e-06	0.259024	0.121	0.289	0.0433808	4	Entpd1
Ecm11	2.29018e-06	0.285254	0.197	0.427	0.0455768	4	Ecm1
Mknk2	2.33954e-06	0.327429	0.189	0.427	0.0465591	4	Mknk2
Bod1l	2.38118e-06	0.361249	0.227	0.492	0.0473878	4	Bod1l
Eea1	2.42141e-06	0.269194	0.136	0.314	0.0481886	4	Eea1
Arrdc1	2.48943e-06	0.271606	0.117	0.303	0.0495422	4	Arrdc1
Tox1	2.52649e-06	0.252023	0.163	0.389	0.0502796	4	Tox
Cdk12	2.675e-06	0.286029	0.144	0.338	0.0532351	4	Cdk12
Il21r	2.7533e-06	0.267782	0.129	0.296	0.0547934	4	Il21r
Pdcd4	3.04256e-06	0.267422	0.277	0.563	0.06055	4	Pdcd4
Sipa1	3.17514e-06	0.269756	0.114	0.291	0.0631885	4	Sipa1
Tiam1	3.37693e-06	0.261145	0.11	0.255	0.0672043	4	Tiam1
Arid1a	3.5202e-06	0.282138	0.144	0.357	0.0700555	4	Arid1a
Dnajc5	3.81871e-06	0.286859	0.144	0.361	0.0759962	4	Dnajc5
Fbxo33	4.10385e-06	0.259499	0.08	0.204	0.0816708	4	Fbxo33
Creb1	4.21807e-06	0.289925	0.11	0.276	0.0839438	4	Creb1
Phf20l1	4.29626e-06	0.312193	0.152	0.355	0.0854999	4	Phf20l1
Cflar	4.97612e-06	0.358976	0.212	0.459	0.0990297	4	Cflar
Lrrc8c	5.02354e-06	0.257582	0.125	0.294	0.0999734	4	Lrrc8c
Ahnak1	5.05034e-06	0.904355	0.523	0.611	0.100507	4	Ahnak
Slc5a3	5.24174e-06	0.327741	0.11	0.27	0.104316	4	Slc5a3
Emsy	5.34876e-06	0.277485	0.106	0.281	0.106446	4	Emsy
Tpr	5.61995e-06	0.278221	0.299	0.656	0.111843	4	Tpr
Serinc1	5.77459e-06	0.251453	0.205	0.453	0.11492	4	Serinc1
Vps4b	5.91154e-06	0.264488	0.136	0.327	0.117646	4	Vps4b
1700020I14Rik	6.13799e-06	0.311798	0.182	0.41	0.122152	4	1700020I14Rik
Prkca	7.56553e-06	0.25602	0.201	0.451	0.150562	4	Prkca
Luc7l3	7.80712e-06	0.318107	0.174	0.411	0.15537	4	Luc7l3
Os9	8.00656e-06	0.339302	0.136	0.318	0.159339	4	Os9
Mark2	8.16737e-06	0.421322	0.155	0.328	0.162539	4	Mark2
Atp2b1	8.81748e-06	0.348673	0.265	0.528	0.175477	4	Atp2b1
Trpm7	1.04176e-05	0.341769	0.095	0.219	0.207321	4	Trpm7
Pum2	1.30652e-05	0.335641	0.17	0.378	0.260011	4	Pum2
Il16	1.32691e-05	0.298598	0.133	0.295	0.264069	4	Il16
Ttc14	1.32845e-05	0.379358	0.235	0.495	0.264375	4	Ttc14
Alkbh5	1.35412e-05	0.326357	0.197	0.428	0.269483	4	Alkbh5
9930111J21Rik2	1.36567e-05	0.267133	0.167	0.351	0.271782	4	9930111J21Rik2
Ppp1r15a1	1.43856e-05	0.266425	0.254	0.526	0.286289	4	Ppp1r15a
Plekha2	1.54516e-05	0.373469	0.121	0.262	0.307502	4	Plekha2
Pim11	1.69952e-05	0.470437	0.735	0.921	0.338221	4	Pim1
Psap	1.71499e-05	0.323366	0.201	0.432	0.341299	4	Psap
Sash3	1.72854e-05	0.320661	0.174	0.382	0.343997	4	Sash3
Chd1	1.79098e-05	0.26219	0.121	0.295	0.356422	4	Chd1
Dctn4	1.79247e-05	0.299745	0.106	0.253	0.356719	4	Dctn4
Ppp3cb	1.81135e-05	0.255887	0.106	0.282	0.360477	4	Ppp3cb
Skil	1.82479e-05	0.360821	0.205	0.41	0.363152	4	Skil
Prdm1	1.90138e-05	0.378456	0.159	0.353	0.378394	4	Prdm1
Ptbp3	1.9155e-05	0.280983	0.322	0.669	0.381204	4	Ptbp3
Atxn7l1	2.04535e-05	0.304114	0.098	0.234	0.407045	4	Atxn7l1
Nisch	2.11135e-05	0.337708	0.174	0.383	0.420179	4	Nisch
Atf4	2.15228e-05	0.344105	0.239	0.497	0.428324	4	Atf4
Inpp4b	2.2682e-05	0.415438	0.258	0.537	0.451395	4	Inpp4b
Camk41	2.29667e-05	0.33482	0.28	0.567	0.45706	4	Camk4
Arih1	2.33784e-05	0.311593	0.114	0.261	0.465253	4	Arih1
Pkn2	2.3638e-05	0.251729	0.121	0.275	0.47042	4	Pkn2
Nampt	2.3715e-05	0.417758	0.14	0.324	0.471952	4	Nampt
Thoc2	2.38179e-05	0.355224	0.159	0.351	0.474	4	Thoc2
Dleu2	2.40733e-05	0.253758	0.08	0.214	0.479083	4	Dleu2
Bclaf1	2.4261e-05	0.384506	0.186	0.387	0.482818	4	Bclaf1
Bptf	2.65693e-05	0.320738	0.201	0.42	0.528755	4	Bptf
Usp3	2.74528e-05	0.386866	0.133	0.285	0.546338	4	Usp3
Pcm1	2.81143e-05	0.307898	0.098	0.234	0.559504	4	Pcm1
Mafg	2.8724e-05	0.34683	0.133	0.286	0.571637	4	Mafg
2010111I01Rik	2.89131e-05	0.32452	0.189	0.403	0.575399	4	2010111I01Rik
BC005537	2.99021e-05	0.320992	0.186	0.408	0.595082	4	BC005537
5830444F18Rik1	3.08457e-05	0.29454	0.155	0.328	0.61386	4	5830444F18Rik
Akna	3.14126e-05	0.294816	0.159	0.349	0.625142	4	Akna
Gm26699	3.23154e-05	0.255832	0.087	0.221	0.643109	4	Gm26699
Cdk6	3.2971e-05	0.449385	0.212	0.397	0.656155	4	Cdk6
Uhrf2	3.37556e-05	0.463345	0.235	0.475	0.671771	4	Uhrf2
Notch1	3.38206e-05	0.278019	0.117	0.265	0.673064	4	Notch1
Wac	3.42658e-05	0.29847	0.167	0.387	0.681923	4	Wac
Ankrd17	3.5345e-05	0.281934	0.114	0.276	0.703401	4	Ankrd17
Cntrl	3.57941e-05	0.3494	0.182	0.381	0.712338	4	Cntrl
Fnip1	3.63879e-05	0.309864	0.064	0.152	0.724155	4	Fnip1
Cdk17	3.66899e-05	0.315741	0.14	0.321	0.730166	4	Cdk17
Adipor2	3.83695e-05	0.302068	0.14	0.321	0.763591	4	Adipor2
Clk1	3.89581e-05	0.452968	0.265	0.561	0.775305	4	Clk1
Ptpn22	4.1596e-05	0.354022	0.186	0.373	0.827803	4	Ptpn22
Cyth1	4.20085e-05	0.303254	0.152	0.295	0.836011	4	Cyth1
Plcxd2	4.21295e-05	0.273118	0.098	0.222	0.83842	4	Plcxd2
N4bp2l2	4.27551e-05	0.348616	0.174	0.369	0.85087	4	N4bp2l2
Acap1	4.27925e-05	0.410125	0.167	0.378	0.851613	4	Acap1
Sptbn1	4.28381e-05	0.374148	0.163	0.35	0.852521	4	Sptbn1
Stx16	4.40987e-05	0.263626	0.133	0.297	0.877608	4	Stx16
Rab27a	4.43332e-05	0.297801	0.08	0.188	0.882276	4	Rab27a
Spn	4.45022e-05	0.429702	0.193	0.379	0.885638	4	Spn
Ppp6r1	4.52114e-05	0.384594	0.17	0.359	0.899752	4	Ppp6r1
Tgfbr1	4.56118e-05	0.27096	0.076	0.187	0.907721	4	Tgfbr1
Foxo1	4.84778e-05	0.384412	0.208	0.422	0.964757	4	Foxo1
Iqgap1	4.89653e-05	0.402386	0.284	0.567	0.974458	4	Iqgap1
Ccny	5.02059e-05	0.279669	0.087	0.213	0.999148	4	Ccny
Gm43430	5.03066e-05	0.305981	0.083	0.198	1	4	Gm43430
Gpbp1l1	5.12883e-05	0.331249	0.174	0.359	1	4	Gpbp1l1
Zc3h12d	5.14696e-05	0.307662	0.129	0.284	1	4	Zc3h12d
Msi2	5.162e-05	0.448964	0.242	0.487	1	4	Msi2
Ppp1r12a	5.20478e-05	0.33613	0.22	0.445	1	4	Ppp1r12a
Btg21	5.23707e-05	0.400289	0.269	0.515	1	4	Btg2
Fam53b	5.25775e-05	0.314923	0.189	0.383	1	4	Fam53b
Taf3	5.3168e-05	0.257849	0.072	0.18	1	4	Taf3
Tab2	5.37569e-05	0.350935	0.197	0.417	1	4	Tab2
Card19	5.56576e-05	0.251012	0.053	0.175	1	4	Card19
Rif11	5.81053e-05	0.310822	0.121	0.274	1	4	Rif1
Rbm10	5.81449e-05	0.25656	0.049	0.131	1	4	Rbm10
Fam133b	6.43871e-05	0.332283	0.121	0.285	1	4	Fam133b
Zcchc7	6.47569e-05	0.30602	0.178	0.371	1	4	Zcchc7
Eif4g3	7.04505e-05	0.318143	0.136	0.328	1	4	Eif4g3
Usp7	7.23144e-05	0.259672	0.095	0.223	1	4	Usp7
Dgka1	7.44221e-05	0.278066	0.152	0.337	1	4	Dgka
St8sia4	7.46377e-05	0.331718	0.193	0.391	1	4	St8sia4
Raf1	7.56076e-05	0.264163	0.091	0.21	1	4	Raf1
Pcmtd1	7.60588e-05	0.297167	0.144	0.299	1	4	Pcmtd1
Mindy2	7.93598e-05	0.29464	0.129	0.265	1	4	Mindy2
Aim2	8.09541e-05	0.267272	0.095	0.235	1	4	Aim2
Ktn1	8.29063e-05	0.402651	0.091	0.204	1	4	Ktn1
Cpsf6	8.31581e-05	0.364395	0.159	0.347	1	4	Cpsf6
Zbtb1	8.56254e-05	0.335745	0.174	0.377	1	4	Zbtb1
Gm20186	8.63469e-05	0.273763	0.121	0.271	1	4	Gm20186
Zcchc6	8.90917e-05	0.503725	0.193	0.388	1	4	Zcchc6
Cbl	9.03348e-05	0.363166	0.227	0.455	1	4	Cbl
Gpatch8	9.39659e-05	0.363772	0.148	0.313	1	4	Gpatch8
Fbxo11	9.57782e-05	0.300514	0.095	0.215	1	4	Fbxo11
Kmt2e	9.78826e-05	0.404448	0.277	0.54	1	4	Kmt2e
Cmip	9.95464e-05	0.442982	0.125	0.257	1	4	Cmip
Egln2	9.96495e-05	0.292261	0.076	0.187	1	4	Egln2
Cers5	0.000105261	0.274763	0.087	0.218	1	4	Cers5
Laptm5	0.000111392	0.553144	0.659	0.907	1	4	Laptm5
Prrc2a	0.000111795	0.297173	0.117	0.27	1	4	Prrc2a
Fnbp1	0.000112939	0.305803	0.261	0.525	1	4	Fnbp1
Larp4b	0.0001171	0.327765	0.117	0.266	1	4	Larp4b
Hsph1	0.00011858	0.675062	0.178	0.355	1	4	Hsph1
Nipbl	0.000119151	0.298842	0.186	0.382	1	4	Nipbl
Rprd2	0.000119318	0.305423	0.098	0.202	1	4	Rprd2
Pea15a	0.000124285	0.257972	0.068	0.151	1	4	Pea15a
Pabpn1	0.000126583	0.261351	0.091	0.218	1	4	Pabpn1
Gsk3b	0.000126825	0.408808	0.231	0.462	1	4	Gsk3b
Spata6	0.000127405	0.257803	0.072	0.16	1	4	Spata6
Nudcd3	0.000128092	0.377844	0.189	0.387	1	4	Nudcd3
Ubtf	0.000130451	0.377634	0.174	0.356	1	4	Ubtf
Fam129a	0.000131375	0.365907	0.197	0.391	1	4	Fam129a
Nr3c1	0.000132727	0.373286	0.235	0.478	1	4	Nr3c1
Swt1	0.0001379	0.301172	0.125	0.248	1	4	Swt1
Nabp1	0.000139877	0.327758	0.197	0.385	1	4	Nabp1
AI504432	0.000152468	0.290867	0.102	0.224	1	4	AI504432
Ldb1	0.000158155	0.278464	0.114	0.247	1	4	Ldb1
Fcho1	0.000158822	0.276648	0.095	0.203	1	4	Fcho1
H2-Q6	0.000163403	0.432189	0.182	0.366	1	4	H2-Q6
Cep164	0.000169218	0.269858	0.053	0.128	1	4	Cep164
Setx	0.000172351	0.326221	0.114	0.253	1	4	Setx
Ttc39b	0.00017306	0.38171	0.239	0.474	1	4	Ttc39b
Chd4	0.000181058	0.338867	0.277	0.549	1	4	Chd4
Wdr82	0.00018403	0.275518	0.11	0.235	1	4	Wdr82
Acly	0.000193072	0.250965	0.091	0.208	1	4	Acly
Snx18	0.000195867	0.282947	0.284	0.544	1	4	Snx18
Tm9sf2	0.000200936	0.275897	0.102	0.242	1	4	Tm9sf2
Smg1	0.000203387	0.314433	0.11	0.226	1	4	Smg1
Clcn3	0.000203518	0.257395	0.095	0.204	1	4	Clcn3
Zfp36l21	0.000208348	0.390037	0.269	0.534	1	4	Zfp36l2
Zmym5	0.000211167	0.369785	0.114	0.223	1	4	Zmym5
Tecpr1	0.00021126	0.347943	0.125	0.246	1	4	Tecpr1
Ccnl1	0.000217409	0.35418	0.212	0.405	1	4	Ccnl1
Gatad2b	0.000217897	0.282054	0.117	0.241	1	4	Gatad2b
Mier1	0.000218701	0.381612	0.299	0.594	1	4	Mier1
Sema4d	0.000221012	0.396349	0.235	0.453	1	4	Sema4d
Fbxl3	0.00022287	0.29596	0.125	0.262	1	4	Fbxl3
Sesn3	0.000224886	0.311099	0.125	0.265	1	4	Sesn3
Luc7l2	0.000239907	0.395133	0.227	0.462	1	4	Luc7l2
Dhx40	0.000241729	0.287591	0.087	0.201	1	4	Dhx40
Uhmk1	0.000252802	0.284955	0.057	0.133	1	4	Uhmk1
N4bp11	0.000257256	0.435359	0.231	0.454	1	4	N4bp1
Sytl1	0.000258049	0.316201	0.136	0.286	1	4	Sytl1
Dcaf15	0.000267727	0.270012	0.106	0.246	1	4	Dcaf15
Arid4b1	0.000268598	0.299573	0.258	0.512	1	4	Arid4b
Mtf2	0.000269088	0.442951	0.091	0.202	1	4	Mtf2
Gm15472	0.000281389	0.264412	0.121	0.238	1	4	Gm15472
Pbxip1	0.000286338	0.382373	0.205	0.399	1	4	Pbxip1
Grk6	0.000286758	0.427037	0.14	0.276	1	4	Grk6
Runx2	0.000290836	0.396527	0.186	0.38	1	4	Runx2
Elf4	0.000291927	0.329032	0.106	0.208	1	4	Elf4
Shoc2	0.000293498	0.268722	0.072	0.175	1	4	Shoc2
Rab6a	0.000296044	0.261438	0.106	0.236	1	4	Rab6a
Tnfaip3	0.000298134	0.301543	0.318	0.596	1	4	Tnfaip3
Dync1li1	0.000317509	0.259591	0.083	0.197	1	4	Dync1li1
Brd1	0.000320078	0.374964	0.163	0.326	1	4	Brd1
Xiap	0.000328536	0.332338	0.159	0.324	1	4	Xiap
Ncoa3	0.000331968	0.356032	0.193	0.361	1	4	Ncoa3
9330162G02Rik	0.000334284	0.305612	0.11	0.228	1	4	9330162G02Rik
Cdc73	0.000336498	0.262095	0.076	0.191	1	4	Cdc73
Arhgap4	0.000338144	0.281355	0.114	0.242	1	4	Arhgap4
Znrf2	0.000357388	0.260974	0.133	0.281	1	4	Znrf2
Rnmt	0.00035904	0.256186	0.042	0.12	1	4	Rnmt
Ubc1	0.000360852	0.369435	0.356	0.647	1	4	Ubc
Kdm6a	0.000362654	0.278914	0.095	0.195	1	4	Kdm6a
Hnrnph1	0.000371393	0.382305	0.182	0.38	1	4	Hnrnph1
Polr2a	0.00038374	0.267366	0.14	0.313	1	4	Polr2a
Vmp11	0.000385595	0.420196	0.341	0.659	1	4	Vmp1
Irf2bp21	0.000394879	0.44268	0.205	0.403	1	4	Irf2bp2
Prpf4b	0.00039499	0.4417	0.22	0.458	1	4	Prpf4b
Dennd1b	0.000427788	0.272077	0.091	0.197	1	4	Dennd1b
Gabpb2	0.000435422	0.282317	0.095	0.203	1	4	Gabpb2
Tsc22d4	0.000439558	0.315643	0.33	0.646	1	4	Tsc22d4
Inpp5d	0.000445239	0.341239	0.14	0.282	1	4	Inpp5d
Glg1	0.00045983	0.296582	0.129	0.278	1	4	Glg1
Stat3	0.000465208	0.295707	0.288	0.589	1	4	Stat3
Qk	0.000491071	0.325632	0.125	0.276	1	4	Qk
Cxcr4	0.00049217	0.333979	0.155	0.301	1	4	Cxcr4
Abhd2	0.000499634	0.261359	0.068	0.154	1	4	Abhd2
Epc1	0.000513749	0.29266	0.106	0.226	1	4	Epc1
Man1a2	0.000514903	0.314536	0.129	0.283	1	4	Man1a2
Mdfic1	0.000530196	0.290199	0.22	0.441	1	4	Mdfic
Kcnq1ot1	0.000537355	0.276301	0.155	0.309	1	4	Kcnq1ot1
Hist1h1e1	0.000540383	0.376282	0.133	0.261	1	4	Hist1h1e
Baz2a	0.000564177	0.266699	0.114	0.249	1	4	Baz2a
Kdm2a	0.000567408	0.334032	0.125	0.237	1	4	Kdm2a
Trim12c	0.000579365	0.294533	0.163	0.312	1	4	Trim12c
Tgoln1	0.000589373	0.478725	0.25	0.464	1	4	Tgoln1
Grina	0.00061378	0.332798	0.14	0.278	1	4	Grina
Tes	0.000614837	0.453519	0.223	0.45	1	4	Tes
Prpf38b	0.000635474	0.379165	0.269	0.515	1	4	Prpf38b
Gbp2b1	0.000660025	0.32258	0.114	0.25	1	4	Gbp2b
Zfp329	0.000663288	0.256885	0.057	0.137	1	4	Zfp329
Cpd	0.000672633	0.260583	0.076	0.162	1	4	Cpd
Mef2d	0.000675956	0.387653	0.152	0.312	1	4	Mef2d
Gm26532	0.00069852	0.336637	0.083	0.166	1	4	Gm26532
Csnk1g3	0.0007011	0.374583	0.159	0.295	1	4	Csnk1g3
Eml4	0.000713378	0.316697	0.087	0.176	1	4	Eml4
Rasgrp1	0.000738478	0.356788	0.129	0.246	1	4	Rasgrp1
Endod1	0.000780838	0.276138	0.068	0.154	1	4	Endod1
Pld31	0.000803628	0.393193	0.25	0.464	1	4	Pld3
Ddx17	0.000880637	0.395308	0.163	0.291	1	4	Ddx17
Vsir	0.000882769	0.33979	0.197	0.368	1	4	Vsir
Slc38a2	0.0008865	0.383903	0.155	0.293	1	4	Slc38a2
Ehbp1l1	0.000906379	0.322542	0.095	0.194	1	4	Ehbp1l1
Ppp1r16b	0.000911568	0.406654	0.22	0.42	1	4	Ppp1r16b
Man2a1	0.000956329	0.273685	0.095	0.193	1	4	Man2a1
Esyt2	0.000965385	0.345015	0.117	0.229	1	4	Esyt2
Dcaf7	0.000969938	0.291228	0.064	0.133	1	4	Dcaf7
Ccr21	0.000984699	0.501407	0.621	0.775	1	4	Ccr2
Cblb	0.00103307	0.421916	0.152	0.28	1	4	Cblb
Ppp4r3b	0.0010536	0.41996	0.205	0.405	1	4	Ppp4r3b
B4galt1	0.00106646	0.343811	0.11	0.219	1	4	B4galt1
Zfp871	0.00110644	0.253649	0.102	0.196	1	4	Zfp871
Cpeb4	0.00113983	0.273745	0.072	0.143	1	4	Cpeb4
Eif4e3	0.00115107	0.290844	0.095	0.199	1	4	Eif4e3
Mllt10	0.0011632	0.281831	0.11	0.239	1	4	Mllt10
Phip	0.00116975	0.430218	0.133	0.255	1	4	Phip
Golgb1	0.00117822	0.454412	0.152	0.268	1	4	Golgb1
Map3k1	0.0011938	0.436866	0.155	0.275	1	4	Map3k1
Sfi1	0.00121444	0.330859	0.235	0.458	1	4	Sfi1
Zfand5	0.00122956	0.390794	0.167	0.32	1	4	Zfand5
Itgb8	0.00123389	0.257198	0.125	0.236	1	4	Itgb8
Rara	0.00125072	0.265313	0.114	0.222	1	4	Rara
Jade1	0.0012794	0.26147	0.053	0.135	1	4	Jade1
Rock1	0.0013068	0.272024	0.348	0.665	1	4	Rock1
Parp14	0.00136119	0.419697	0.193	0.361	1	4	Parp14
Gm37033	0.00139353	0.377399	0.284	0.522	1	4	Gm37033
Ndrg11	0.00140839	0.40026	0.152	0.268	1	4	Ndrg1
AC117245.3	0.00141654	0.267996	0.083	0.179	1	4	AC117245.3
Atxn1	0.00142254	0.371676	0.163	0.295	1	4	Atxn1
Erdr12	0.00143963	0.420416	0.299	0.552	1	4	Erdr1
2510039O18Rik	0.00149387	0.302947	0.08	0.17	1	4	2510039O18Rik
Celf2	0.00152842	0.374319	0.318	0.631	1	4	Celf2
Chd7	0.00152968	0.335494	0.125	0.236	1	4	Chd7
Myo9b	0.0015518	0.255758	0.072	0.178	1	4	Myo9b
Med1	0.00156235	0.315699	0.114	0.224	1	4	Med1
Numa1	0.00159203	0.367791	0.129	0.247	1	4	Numa1
Gcnt1	0.0016227	0.317202	0.125	0.242	1	4	Gcnt1
Arhgef1	0.0017207	0.476051	0.295	0.565	1	4	Arhgef1
Herc1	0.00174901	0.29336	0.08	0.19	1	4	Herc1
Rc3h1	0.00178339	0.269263	0.102	0.232	1	4	Rc3h1
Larp1	0.00178799	0.332287	0.102	0.235	1	4	Larp1
Gm37881	0.00179243	0.384469	0.17	0.303	1	4	Gm37881
Gramd1a	0.00179466	0.296348	0.106	0.214	1	4	Gramd1a
Ythdf3	0.00180311	0.262148	0.106	0.219	1	4	Ythdf3
Gpcpd1	0.00183181	0.358298	0.106	0.208	1	4	Gpcpd1
Kdm5c	0.00189034	0.253445	0.068	0.149	1	4	Kdm5c
Itga41	0.00189731	0.28147	0.08	0.161	1	4	Itga4
Lpgat1	0.00190296	0.258126	0.091	0.182	1	4	Lpgat1
Rbm33	0.00191849	0.398094	0.144	0.267	1	4	Rbm33
Sgms1	0.00192886	0.270764	0.098	0.192	1	4	Sgms1
Gm37248	0.00193827	0.401344	0.148	0.275	1	4	Gm37248
Atp2a3	0.00194617	0.334429	0.076	0.155	1	4	Atp2a3
Limd1	0.00194922	0.277732	0.117	0.242	1	4	Limd1
Ncmap	0.00196087	0.276455	0.08	0.151	1	4	Ncmap
Usp9x	0.00196092	0.253391	0.095	0.187	1	4	Usp9x
Mbnl11	0.00196222	0.491554	0.583	0.852	1	4	Mbnl1
Atxn7	0.00196419	0.321715	0.083	0.188	1	4	Atxn7
Rasa1	0.0020369	0.354546	0.098	0.198	1	4	Rasa1
Gm37474	0.00203907	0.436986	0.133	0.254	1	4	Gm37474
Rapgef61	0.00204751	0.334512	0.326	0.603	1	4	Rapgef6
Gimap31	0.00204834	0.505677	0.625	0.878	1	4	Gimap3
Tet3	0.00205264	0.302133	0.121	0.223	1	4	Tet3
Dync1h1	0.00209529	0.280782	0.072	0.154	1	4	Dync1h1
Chd3	0.00213978	0.38259	0.33	0.614	1	4	Chd3
Zc3h7a	0.00216989	0.284311	0.106	0.208	1	4	Zc3h7a
Setd1b	0.00218784	0.340796	0.08	0.168	1	4	Setd1b
Mllt3	0.00219797	0.367527	0.152	0.288	1	4	Mllt3
Ip6k1	0.00221475	0.352378	0.136	0.247	1	4	Ip6k1
Crebrf	0.00222585	0.318582	0.144	0.254	1	4	Crebrf
Ankrd44	0.00226487	0.36316	0.125	0.233	1	4	Ankrd44
Gm4316	0.00231278	0.335428	0.11	0.214	1	4	Gm4316
Sppl3	0.00234208	0.294336	0.061	0.12	1	4	Sppl3
Gm45223	0.00237071	0.406353	0.152	0.283	1	4	Gm45223
Lrba	0.00237848	0.380425	0.136	0.255	1	4	Lrba
Dock2	0.00248023	0.369542	0.292	0.54	1	4	Dock2
Hspa4l	0.00253845	0.336717	0.148	0.258	1	4	Hspa4l
Dock10	0.00254551	0.360998	0.14	0.281	1	4	Dock10
Tln1	0.00259877	0.255955	0.364	0.705	1	4	Tln1
Cep350	0.00264068	0.262562	0.076	0.172	1	4	Cep350
Icos1	0.00266149	0.291987	0.788	0.95	1	4	Icos
Foxn3	0.00277453	0.250955	0.136	0.289	1	4	Foxn3
Il18r1	0.00278294	0.391188	0.197	0.361	1	4	Il18r1
Fem1c	0.00278627	0.406107	0.167	0.286	1	4	Fem1c
Prdm2	0.00280754	0.301579	0.098	0.173	1	4	Prdm2
Nfx1	0.00289484	0.255023	0.072	0.163	1	4	Nfx1
Prrc2b	0.00292701	0.318115	0.189	0.367	1	4	Prrc2b
Gbp9	0.00296518	0.305146	0.106	0.211	1	4	Gbp9
Matk1	0.00297724	0.260647	0.098	0.196	1	4	Matk
Taok1	0.003044	0.26208	0.121	0.225	1	4	Taok1
Gxylt1	0.00305451	0.337434	0.125	0.224	1	4	Gxylt1
Ikzf1	0.00317434	0.396608	0.205	0.399	1	4	Ikzf1
Sec24c	0.00317445	0.264322	0.072	0.145	1	4	Sec24c
Plcg1	0.00318561	0.289615	0.095	0.191	1	4	Plcg1
Birc3	0.00319484	0.388399	0.178	0.343	1	4	Birc3
Ypel31	0.00322842	0.363022	0.333	0.585	1	4	Ypel3
Ascc3	0.00330134	0.303194	0.129	0.265	1	4	Ascc3
Iws1	0.00334844	0.365468	0.11	0.213	1	4	Iws1
Susd6	0.00350153	0.267583	0.098	0.178	1	4	Susd6
Ccr51	0.00350374	0.443326	0.288	0.498	1	4	Ccr5
Gmip	0.00351417	0.282736	0.068	0.148	1	4	Gmip
Camk2g	0.0035207	0.306803	0.076	0.154	1	4	Camk2g
Nlrc3	0.0035263	0.293196	0.072	0.149	1	4	Nlrc3
A630081D01Rik	0.00362227	0.372667	0.11	0.192	1	4	A630081D01Rik
Arfgef1	0.00367628	0.306121	0.106	0.226	1	4	Arfgef1
Atp11b	0.00367969	0.504865	0.201	0.366	1	4	Atp11b
Hip1r	0.00369033	0.296335	0.091	0.166	1	4	Hip1r
Lamc1	0.00388096	0.343011	0.208	0.373	1	4	Lamc1
Arap2	0.00388805	0.30517	0.064	0.134	1	4	Arap2
Vps54	0.00394188	0.436402	0.186	0.334	1	4	Vps54
Utrn1	0.00399564	0.341258	0.106	0.21	1	4	Utrn
Ptk2b	0.00401784	0.344307	0.114	0.222	1	4	Ptk2b
Zfp106	0.00404362	0.331355	0.114	0.224	1	4	Zfp106
A830080D01Rik	0.00404368	0.40604	0.125	0.232	1	4	A830080D01Rik
Kdm5a	0.00420378	0.498549	0.178	0.317	1	4	Kdm5a
Itgav	0.00421966	0.405763	0.159	0.287	1	4	Itgav
Arfgap2	0.00428271	0.276911	0.076	0.162	1	4	Arfgap2
Mycbp2	0.00456328	0.436731	0.25	0.466	1	4	Mycbp2
Mical1	0.00466793	0.279274	0.08	0.17	1	4	Mical1
Gtpbp2	0.00471278	0.264896	0.087	0.192	1	4	Gtpbp2
Gm26917	0.00474987	0.616882	0.216	0.384	1	4	Gm26917
Gm8818	0.00480613	0.295489	0.076	0.148	1	4	Gm8818
Gm37728	0.00484707	0.32145	0.11	0.194	1	4	Gm37728
Mysm1	0.00519503	0.345188	0.117	0.202	1	4	Mysm1
Atf7ip	0.00532509	0.396499	0.167	0.308	1	4	Atf7ip
Arglu1	0.00535199	0.472207	0.239	0.443	1	4	Arglu1
Upf2	0.00539075	0.388553	0.121	0.235	1	4	Upf2
Ranbp2	0.00542102	0.509155	0.163	0.284	1	4	Ranbp2
Gm45266	0.00564681	0.351933	0.102	0.195	1	4	Gm45266
Washc4	0.00579329	0.282643	0.087	0.163	1	4	Washc4
Sipa1l1	0.00583759	0.333234	0.08	0.155	1	4	Sipa1l1
Atad2b	0.00584557	0.366639	0.08	0.136	1	4	Atad2b
Gm44694	0.00588205	0.38066	0.17	0.285	1	4	Gm44694
Ccnl2	0.00591646	0.434247	0.167	0.289	1	4	Ccnl2
Furin	0.00600744	0.310721	0.087	0.177	1	4	Furin
P4ha1	0.00601393	0.375278	0.223	0.402	1	4	P4ha1
Ogt	0.00609227	0.39494	0.17	0.288	1	4	Ogt
Kdm6b	0.00610445	0.363743	0.14	0.254	1	4	Kdm6b
C230085N15Rik	0.00629494	0.340358	0.136	0.257	1	4	C230085N15Rik
Adcy7	0.00635056	0.34487	0.076	0.143	1	4	Adcy7
Adar	0.00637196	0.300898	0.08	0.149	1	4	Adar
Lnpep	0.00685751	0.374772	0.106	0.166	1	4	Lnpep
Golga4	0.00700516	0.320032	0.117	0.229	1	4	Golga4
Ddx6	0.00725856	0.432213	0.208	0.373	1	4	Ddx6
Ago2	0.00740734	0.350128	0.205	0.386	1	4	Ago2
Lncpint	0.00750252	0.372038	0.133	0.234	1	4	Lncpint
Wnk11	0.00751104	0.545712	0.561	0.804	1	4	Wnk1
Map4k2	0.00768186	0.452926	0.125	0.217	1	4	Map4k2
Tgfbr2	0.00771755	0.353384	0.095	0.191	1	4	Tgfbr2
Tmx4	0.00772791	0.308477	0.076	0.158	1	4	Tmx4
Map2k7.1	0.00785438	0.264454	0.049	0.106	1	4	Map2k7.1
Rbms1	0.00791487	0.513131	0.292	0.513	1	4	Rbms1
Lgals31	0.00793082	0.32072	0.258	0.417	1	4	Lgals3
Phf8	0.00820178	0.330172	0.08	0.137	1	4	Phf8
Asxl21	0.00821608	0.389911	0.152	0.279	1	4	Asxl2
Tle4	0.0083072	0.285181	0.102	0.185	1	4	Tle4
Gm44292	0.00839137	0.385957	0.117	0.215	1	4	Gm44292
Zbtb7b	0.00845298	0.28916	0.083	0.177	1	4	Zbtb7b
Gm45221	0.00851632	0.313241	0.091	0.186	1	4	Gm45221
Ikzf3	0.00862627	0.251087	0.106	0.198	1	4	Ikzf3
Msl2	0.00864618	0.276575	0.106	0.211	1	4	Msl2
Zbtb7a	0.00870441	0.512531	0.174	0.296	1	4	Zbtb7a
2810474O19Rik	0.00873661	0.466562	0.314	0.563	1	4	2810474O19Rik
Heca	0.00877442	0.389986	0.208	0.373	1	4	Heca
Foxp1	0.00881067	0.285734	0.117	0.195	1	4	Foxp1
Senp1	0.00926448	0.267509	0.057	0.119	1	4	Senp1
Sacs	0.00935017	0.288882	0.091	0.17	1	4	Sacs
Csnk1g1	0.00951459	0.273121	0.076	0.15	1	4	Csnk1g1
Npepps	0.00960632	0.405147	0.102	0.186	1	4	Npepps
Usp34	0.00961442	0.45181	0.163	0.3	1	4	Usp34
Fbrs	0.0097492	0.27536	0.068	0.136	1	4	Fbrs
Hnrnph3	0.00991758	0.328204	0.102	0.178	1	4	Hnrnph3
Zswim8	0.00992371	0.336243	0.061	0.117	1	4	Zswim8

## Sheet: Cluster_markers_NKT_cells
	p_val	avg_logFC	pct.1	pct.2	p_val_adj	cluster	gene
Ccl5	8.11202e-67	0.965337	0.9	0.609	1.61437e-62	0	Ccl5
Sell	1.12838e-56	0.844649	0.639	0.264	2.24559e-52	0	Sell
Rps27	6.897e-46	0.268479	0.998	1	1.37257e-41	0	Rps27
Ms4a4b	2.12463e-35	0.408796	0.982	0.961	4.22822e-31	0	Ms4a4b
Malat1	5.89444e-33	0.29546	1	1	1.17305e-28	0	Malat1
mt-Nd2	6.66462e-32	0.3164	0.983	0.994	1.32633e-27	0	mt-Nd2
Shisa5	1.96649e-29	0.358932	0.977	0.973	3.91351e-25	0	Shisa5
mt-Nd4	8.53624e-28	0.315312	0.983	0.982	1.6988e-23	0	mt-Nd4
Gm42418	6.34604e-26	0.339559	0.993	0.992	1.26293e-21	0	Gm42418
Gm8995	1.05895e-25	0.449916	0.89	0.857	2.10741e-21	0	Gm8995
Ms4a6b	1.61456e-24	0.399223	0.89	0.89	3.21314e-20	0	Ms4a6b
Tcf7	3.8062e-22	0.488671	0.644	0.484	7.57473e-18	0	Tcf7
Itga4	5.29926e-21	0.590297	0.476	0.293	1.05461e-16	0	Itga4
Ptprc	6.56772e-21	0.309667	0.95	0.947	1.30704e-16	0	Ptprc
Gimap3	6.99287e-21	0.319391	0.935	0.927	1.39165e-16	0	Gimap3
Limd2	1.3718e-19	0.342734	0.863	0.846	2.73001e-15	0	Limd2
Arhgap45	1.06361e-18	0.3633	0.783	0.741	2.1167e-14	0	Arhgap45
Nsg2	2.48762e-18	0.389421	0.22	0.067	4.95062e-14	0	Nsg2
Rps27rt	1.55876e-17	0.303067	0.88	0.903	3.10208e-13	0	Rps27rt
Ly6c2	3.35216e-17	0.36654	0.888	0.836	6.67113e-13	0	Ly6c2
Il7r	3.45789e-17	0.59009	0.518	0.329	6.88154e-13	0	Il7r
AC153495.1	1.28423e-16	0.27651	0.114	0.011	2.55575e-12	0	AC153495.1
mt-Nd5	9.42861e-16	0.281934	0.886	0.886	1.87639e-11	0	mt-Nd5
Ltb	1.15278e-15	0.301407	0.935	0.937	2.29415e-11	0	Ltb
Gm8696	1.21877e-15	0.599886	0.275	0.121	2.42548e-11	0	Gm8696
Cmah	7.80659e-15	0.341105	0.179	0.052	1.55359e-10	0	Cmah
A130071D04Rik	4.28758e-12	0.322928	0.718	0.694	8.53272e-08	0	A130071D04Rik
Hcst	5.45868e-12	0.250256	0.932	0.949	1.08633e-07	0	Hcst
Samhd1	5.90851e-12	0.408069	0.594	0.507	1.17585e-07	0	Samhd1
Ets1	6.64563e-12	0.312197	0.746	0.753	1.32255e-07	0	Ets1
S1pr1	9.05407e-12	0.360687	0.267	0.131	1.80185e-07	0	S1pr1
Samd9l	1.40044e-11	0.417067	0.528	0.449	2.78703e-07	0	Samd9l
Ikzf2	4.15494e-11	0.43922	0.643	0.583	8.26874e-07	0	Ikzf2
Acp5	8.9128e-11	0.342153	0.366	0.236	1.77374e-06	0	Acp5
Pnisr	2.72073e-10	0.336242	0.618	0.602	5.41452e-06	0	Pnisr
Gm28438	1.12526e-09	0.291491	0.793	0.751	2.23937e-05	0	Gm28438
Fam189b	2.20115e-09	0.336439	0.534	0.479	4.3805e-05	0	Fam189b
Il18r1	4.07879e-09	0.301105	0.501	0.383	8.11721e-05	0	Il18r1
Rapgef6	1.13436e-08	0.288985	0.716	0.741	0.000225749	0	Rapgef6
Gm11346	1.43562e-08	0.255443	0.184	0.087	0.000285702	0	Gm11346
Ripor2	2.941e-08	0.318944	0.321	0.219	0.000585288	0	Ripor2
Znrf2	6.60993e-08	0.354258	0.477	0.429	0.00131544	0	Znrf2
Smpdl3a	6.75679e-08	0.29929	0.513	0.463	0.00134467	0	Smpdl3a
Ifi203	7.96263e-08	0.32927	0.713	0.772	0.00158464	0	Ifi203
Slfn5	9.75349e-08	0.319214	0.21	0.113	0.00194104	0	Slfn5
Clec2d	1.35418e-07	0.281698	0.643	0.645	0.00269496	0	Clec2d
Gm4759	2.9173e-07	0.305931	0.591	0.584	0.00580572	0	Gm4759
Kbtbd11	3.46126e-07	0.304522	0.381	0.292	0.00688826	0	Kbtbd11
Macf1	3.85108e-07	0.325733	0.591	0.598	0.00766404	0	Macf1
Gbp9	4.54626e-07	0.330013	0.344	0.267	0.00904751	0	Gbp9
Slamf6	4.64234e-07	0.308025	0.279	0.182	0.00923873	0	Slamf6
Emb	5.91028e-07	0.258724	0.604	0.59	0.011762	0	Emb
Il18rap	2.7224e-06	0.272287	0.366	0.279	0.0541784	0	Il18rap
Nisch	3.35676e-06	0.303003	0.402	0.343	0.0668028	0	Nisch
Ifit3	3.357e-06	0.320375	0.189	0.106	0.0668076	0	Ifit3
Atrx	3.43449e-06	0.2718	0.613	0.63	0.0683498	0	Atrx
Zdhhc20	3.48215e-06	0.251655	0.509	0.48	0.0692982	0	Zdhhc20
Ttc14	4.16667e-06	0.346627	0.496	0.493	0.0829209	0	Ttc14
Gm20559	4.44102e-06	0.322371	0.301	0.234	0.0883808	0	Gm20559
Trim12c	5.30634e-06	0.355133	0.404	0.35	0.105601	0	Trim12c
Kcnq1ot1	6.23454e-06	0.331083	0.484	0.42	0.124074	0	Kcnq1ot1
Sfi1	8.99726e-06	0.277702	0.531	0.532	0.179054	0	Sfi1
Atp1b3	1.26303e-05	0.309367	0.548	0.588	0.251356	0	Atp1b3
Dgka	2.53967e-05	0.256986	0.357	0.291	0.505421	0	Dgka
Atp11b	3.66623e-05	0.280323	0.419	0.396	0.729617	0	Atp11b
Cd9	6.69166e-05	0.263937	0.397	0.348	1	0	Cd9
Adcy7	8.54271e-05	0.257499	0.277	0.217	1	0	Adcy7
Gpr174	9.72278e-05	0.282523	0.349	0.291	1	0	Gpr174
Sidt1	0.000104904	0.280773	0.249	0.183	1	0	Sidt1
Ssh2	0.000151825	0.292016	0.376	0.335	1	0	Ssh2
Ahnak	0.000206019	0.316473	0.689	0.746	1	0	Ahnak
Stat4	0.000216432	0.264347	0.417	0.401	1	0	Stat4
Ms4a4c	0.000217325	0.267965	0.215	0.147	1	0	Ms4a4c
AY036118	0.000273949	0.299311	0.548	0.564	1	0	AY036118
Ube2h	0.000496335	0.263258	0.409	0.398	1	0	Ube2h
Ogt	0.000618086	0.257777	0.297	0.257	1	0	Ogt
Rnf167	0.000777739	0.263213	0.319	0.288	1	0	Rnf167
Arglu1	0.000842782	0.26715	0.486	0.526	1	0	Arglu1
Ipcef1	0.000963224	0.252642	0.344	0.307	1	0	Ipcef1
Add3	0.00169036	0.27621	0.332	0.314	1	0	Add3
Utrn	0.00189053	0.268767	0.347	0.332	1	0	Utrn
Asxl2	0.00190019	0.262273	0.312	0.282	1	0	Asxl2
Cbl	0.00366411	0.259289	0.417	0.418	1	0	Cbl
Hipk1	0.00456956	0.283161	0.412	0.424	1	0	Hipk1
Zbtb20	0.00653508	0.36023	0.297	0.269	1	0	Zbtb20
Kmt2a	0.00859215	0.251563	0.444	0.477	1	0	Kmt2a
A630072M18Rik	0.00881336	0.277773	0.219	0.182	1	0	A630072M18Rik
Lgals3	3.54867e-83	1.28492	0.89	0.37	7.0622e-79	1	Lgals3
Vim	1.89192e-62	0.824224	0.966	0.722	3.76511e-58	1	Vim
Capg	3.94263e-60	0.844805	0.783	0.301	7.84624e-56	1	Capg
S100a1	3.69803e-56	0.56754	0.541	0.12	7.35944e-52	1	S100a1
S100a4	1.42012e-53	1.03962	0.887	0.482	2.82618e-49	1	S100a4
Cdh1	2.35219e-53	0.477225	0.443	0.078	4.68109e-49	1	Cdh1
Gzmb	7.69895e-51	1.36598	0.81	0.409	1.53217e-46	1	Gzmb
S100a6	7.6026e-50	0.871867	0.945	0.754	1.51299e-45	1	S100a6
Lat2	1.38957e-47	0.5088	0.682	0.23	2.76539e-43	1	Lat2
Tnfrsf9	6.72984e-46	0.737243	0.627	0.209	1.33931e-41	1	Tnfrsf9
Car2	2.97734e-45	0.688107	0.44	0.098	5.9252e-41	1	Car2
Jaml	1.31222e-42	0.570011	0.841	0.424	2.61146e-38	1	Jaml
Cdk6	9.86588e-41	0.59222	0.578	0.184	1.96341e-36	1	Cdk6
Reep5	2.43508e-39	0.528868	0.939	0.574	4.84606e-35	1	Reep5
Gapdh	4.03676e-39	0.446812	0.994	0.908	8.03356e-35	1	Gapdh
Lgals1	6.40123e-39	0.747173	0.933	0.703	1.27391e-34	1	Lgals1
Txn1	6.51882e-38	0.492899	0.972	0.727	1.29731e-33	1	Txn1
Actg1	1.0952e-37	0.394414	1	0.99	2.17956e-33	1	Actg1
Itga1	2.5095e-36	0.410643	0.606	0.207	4.99415e-32	1	Itga1
Plac8	6.54438e-36	0.813483	0.709	0.357	1.3024e-31	1	Plac8
Igha	1.00502e-34	0.542932	0.294	0.049	2.0001e-30	1	Igha
Rps27l	1.29139e-33	0.423038	0.807	0.38	2.56999e-29	1	Rps27l
Isg20	2.40512e-33	0.417915	0.578	0.202	4.78643e-29	1	Isg20
Nme1	4.44797e-32	0.441136	0.963	0.678	8.8519e-28	1	Nme1
Gcnt1	2.50721e-31	0.274423	0.284	0.055	4.9896e-27	1	Gcnt1
Gpr34	8.1174e-31	0.274263	0.388	0.101	1.61544e-26	1	Gpr34
Gzmc	1.3184e-30	1.77226	0.327	0.078	2.62375e-26	1	Gzmc
Fgl2	1.74072e-29	0.516741	0.856	0.493	3.46422e-25	1	Fgl2
Aldoa	1.96921e-29	0.454267	0.969	0.767	3.91892e-25	1	Aldoa
Crip1	6.79431e-29	0.517811	0.966	0.749	1.35214e-24	1	Crip1
Ifitm3	1.1379e-28	0.868941	0.312	0.074	2.26454e-24	1	Ifitm3
Qpct	2.03234e-28	0.36503	0.599	0.228	4.04457e-24	1	Qpct
Rbpj	2.97907e-28	0.319698	0.502	0.172	5.92865e-24	1	Rbpj
Ifitm2	3.06404e-28	1.53435	0.37	0.113	6.09776e-24	1	Ifitm2
Eif5a	6.00777e-28	0.39516	1	0.866	1.19561e-23	1	Eif5a
Fxyd5	8.01854e-28	0.32743	0.997	0.971	1.59577e-23	1	Fxyd5
Sh3bgrl3	3.27111e-27	0.342392	1	0.926	6.50985e-23	1	Sh3bgrl3
Eno1	5.79006e-27	0.445426	0.911	0.611	1.15228e-22	1	Eno1
Tpi1	2.23088e-26	0.41058	0.789	0.377	4.43968e-22	1	Tpi1
Emid1	6.60086e-26	0.297522	0.471	0.169	1.31364e-21	1	Emid1
Fcer1g	8.27151e-26	0.521081	0.884	0.668	1.64611e-21	1	Fcer1g
S100a13	1.09596e-25	0.408181	0.936	0.672	2.18107e-21	1	S100a13
Ntan1	1.80642e-25	0.343437	0.688	0.31	3.59495e-21	1	Ntan1
Cotl1	2.01352e-25	0.34619	0.994	0.894	4.00711e-21	1	Cotl1
Ier5l	2.03243e-25	0.364418	0.379	0.115	4.04475e-21	1	Ier5l
Pgk1	2.34761e-25	0.440324	0.862	0.493	4.67197e-21	1	Pgk1
Plp2	2.79264e-25	0.273011	0.612	0.248	5.55763e-21	1	Plp2
Prelid1	1.45565e-24	0.34493	0.777	0.389	2.89689e-20	1	Prelid1
Glrx	2.71142e-24	0.36082	0.676	0.323	5.396e-20	1	Glrx
Pkm	2.79956e-24	0.395143	0.945	0.619	5.57139e-20	1	Pkm
Cish	3.61824e-24	0.270989	0.428	0.146	7.20065e-20	1	Cish
Ldha	4.02182e-24	0.37834	0.957	0.707	8.00383e-20	1	Ldha
Cd244	1.21297e-23	0.277889	0.48	0.178	2.41393e-19	1	Cd244
AA467197	2.82344e-23	0.281011	0.214	0.038	5.61892e-19	1	AA467197
Rnh1	3.16597e-23	0.321865	0.648	0.307	6.3006e-19	1	Rnh1
Cox5a	1.04964e-22	0.309941	0.972	0.737	2.0889e-18	1	Cox5a
Tmem2	1.11465e-22	0.323862	0.431	0.157	2.21827e-18	1	Tmem2
Ssr4	2.24852e-22	0.343958	0.92	0.62	4.47477e-18	1	Ssr4
Plscr1	3.98182e-22	0.267105	0.343	0.106	7.92423e-18	1	Plscr1
Cst7	5.03212e-22	0.285603	0.694	0.322	1.00144e-17	1	Cst7
Atp5f1	1.11344e-21	0.329124	0.963	0.735	2.21586e-17	1	Atp5f1
Gadd45g	2.63433e-21	0.262791	0.428	0.163	5.24259e-17	1	Gadd45g
Dtnbp1	3.63859e-21	0.267328	0.609	0.272	7.24116e-17	1	Dtnbp1
Xcl1	4.01826e-21	0.691826	0.96	0.746	7.99674e-17	1	Xcl1
Psmb2	5.03388e-21	0.333854	0.85	0.483	1.00179e-16	1	Psmb2
Ptms	9.44724e-21	0.312034	0.621	0.286	1.88009e-16	1	Ptms
Clic1	1.07576e-20	0.27359	0.994	0.889	2.14087e-16	1	Clic1
Ech1	1.15958e-20	0.28332	0.691	0.335	2.30768e-16	1	Ech1
Dapk2	1.36578e-20	0.275999	0.48	0.195	2.71804e-16	1	Dapk2
Ywhae	1.37758e-20	0.298026	0.801	0.437	2.74152e-16	1	Ywhae
Litaf	4.71275e-20	0.256806	0.593	0.277	9.37884e-16	1	Litaf
Tcrg-C4	5.96744e-20	0.265122	0.667	0.322	1.18758e-15	1	Tcrg-C4
Ppp1r14b	1.542e-19	0.319476	0.789	0.435	3.06874e-15	1	Ppp1r14b
Psma5	2.4064e-19	0.276794	0.789	0.405	4.78898e-15	1	Psma5
Itgb1	2.4414e-19	0.31104	0.853	0.5	4.85862e-15	1	Itgb1
Ly6e	6.88303e-19	0.441609	0.804	0.481	1.36979e-14	1	Ly6e
Ran	8.98048e-19	0.290906	0.945	0.729	1.78721e-14	1	Ran
Pdia6	9.51888e-19	0.313275	0.798	0.459	1.89435e-14	1	Pdia6
Mif	1.36262e-18	0.359809	0.924	0.675	2.71176e-14	1	Mif
Ncf4	1.68098e-18	0.284831	0.765	0.416	3.34531e-14	1	Ncf4
Cyba	1.83389e-18	0.271918	0.963	0.796	3.64963e-14	1	Cyba
Dbi	2.47844e-18	0.342999	0.685	0.342	4.93234e-14	1	Dbi
Eif4a1	1.02453e-17	0.318368	0.939	0.731	2.03892e-13	1	Eif4a1
Ppp1ca	1.73334e-17	0.253334	0.972	0.791	3.44952e-13	1	Ppp1ca
Cd8a	2.47821e-17	0.684222	0.483	0.247	4.93189e-13	1	Cd8a
Npm1	2.887e-17	0.259035	0.991	0.944	5.74541e-13	1	Npm1
Prdx1	4.26798e-17	0.282739	0.96	0.683	8.49372e-13	1	Prdx1
Eif1ax	4.54615e-17	0.251499	0.716	0.366	9.04729e-13	1	Eif1ax
Mrps16	6.24755e-17	0.263087	0.813	0.426	1.24332e-12	1	Mrps16
Atp5d	7.64742e-17	0.266876	0.969	0.789	1.52191e-12	1	Atp5d
Ybx3	8.39363e-17	0.281203	0.664	0.344	1.67042e-12	1	Ybx3
Klra5	1.66571e-16	0.594083	0.587	0.361	3.31493e-12	1	Klra5
Gng2	5.61611e-16	0.261027	0.765	0.426	1.11766e-11	1	Gng2
Itgae	8.94945e-16	0.300145	0.22	0.064	1.78103e-11	1	Itgae
Irf8	1.22938e-15	0.419007	0.477	0.223	2.44658e-11	1	Irf8
Tyrobp	1.36693e-15	0.49867	0.654	0.409	2.72033e-11	1	Tyrobp
Nkg7	1.65106e-15	0.254683	0.997	0.92	3.28577e-11	1	Nkg7
Tcrg-C2	2.00611e-15	0.348306	0.645	0.357	3.99236e-11	1	Tcrg-C2
Pkp3	2.18669e-15	0.265269	0.523	0.258	4.35174e-11	1	Pkp3
Calr	4.51639e-15	0.284678	0.945	0.759	8.98807e-11	1	Calr
Cox5b	5.8246e-15	0.283402	0.966	0.777	1.15915e-10	1	Cox5b
Hint1	6.53059e-15	0.254156	0.966	0.77	1.29965e-10	1	Hint1
Atp5b	6.95248e-15	0.253739	0.979	0.814	1.38361e-10	1	Atp5b
Dap	1.01316e-14	0.260611	0.633	0.335	2.01629e-10	1	Dap
Psma7	3.01147e-14	0.252709	0.957	0.737	5.99313e-10	1	Psma7
Aprt	4.15137e-14	0.25992	0.789	0.469	8.26165e-10	1	Aprt
Lcp1	6.9952e-14	0.253407	0.982	0.777	1.39211e-09	1	Lcp1
Phb2	1.50454e-13	0.260879	0.804	0.489	2.99419e-09	1	Phb2
Ptpn6	2.04299e-13	0.276391	0.502	0.256	4.06576e-09	1	Ptpn6
Pgam1	2.27812e-13	0.255355	0.786	0.463	4.53369e-09	1	Pgam1
Cd7	1.2266e-12	0.455699	0.862	0.699	2.44106e-08	1	Cd7
Ctla2a	1.38423e-12	0.30423	0.933	0.788	2.75476e-08	1	Ctla2a
Thy1	1.39762e-12	0.256681	0.853	0.652	2.7814e-08	1	Thy1
Spp1	3.08324e-12	0.89003	0.52	0.306	6.13595e-08	1	Spp1
Ifitm1	3.24219e-12	1.42103	0.266	0.105	6.45228e-08	1	Ifitm1
Pdcd1	9.72366e-12	0.340901	0.294	0.128	1.93511e-07	1	Pdcd1
Rgs1	1.28081e-10	0.365328	0.703	0.477	2.54895e-06	1	Rgs1
Klra3	1.33863e-07	0.295192	0.419	0.272	0.002664	1	Klra3
Klra7	3.84425e-07	0.342457	0.483	0.329	0.00765045	1	Klra7
Klra13-ps	6.8827e-07	0.288201	0.483	0.324	0.0136973	1	Klra13-ps
Junb	7.17063e-57	1.42632	0.955	0.696	1.42703e-52	2	Junb
Nfkbia	2.46233e-54	1.41807	0.885	0.516	4.90028e-50	2	Nfkbia
Gadd45b	2.74482e-51	1.4165	0.58	0.142	5.46246e-47	2	Gadd45b
Tnfaip3	8.89593e-50	1.17598	0.7	0.239	1.77038e-45	2	Tnfaip3
Hsp90aa1	2.55794e-47	1.51413	0.935	0.796	5.09055e-43	2	Hsp90aa1
Pnrc1	4.26165e-44	0.965337	0.915	0.683	8.48112e-40	2	Pnrc1
Cxcr4	1.40071e-43	1.17036	0.585	0.164	2.78755e-39	2	Cxcr4
Dnajb1	5.02302e-43	1.57897	0.825	0.471	9.99631e-39	2	Dnajb1
Btg1	3.29013e-42	0.795799	1	0.966	6.54769e-38	2	Btg1
Dnaja1	1.37849e-39	1.365	0.865	0.703	2.74334e-35	2	Dnaja1
Hsph1	3.08276e-38	1.23134	0.66	0.288	6.135e-34	2	Hsph1
Nr4a2	1.40555e-37	0.950113	0.58	0.185	2.79719e-33	2	Nr4a2
Hspa8	2.53514e-37	0.811568	0.99	0.964	5.04517e-33	2	Hspa8
Nr4a1	1.74871e-36	1.13428	0.54	0.166	3.4801e-32	2	Nr4a1
Ubc	2.15132e-36	1.04034	0.86	0.576	4.28134e-32	2	Ubc
Vps37b	9.07951e-36	1.02058	0.825	0.562	1.80691e-31	2	Vps37b
Fosl2	4.13039e-34	1.02658	0.55	0.194	8.2199e-30	2	Fosl2
Ubb	1.56388e-33	0.72241	1	0.991	3.11228e-29	2	Ubb
Ier2	2.49902e-33	0.958718	0.77	0.462	4.97329e-29	2	Ier2
Dusp1	3.33878e-33	1.09698	0.665	0.291	6.64452e-29	2	Dusp1
Btg2	3.92556e-33	0.772713	0.95	0.757	7.81225e-29	2	Btg2
Kdm6b	1.79533e-32	0.897221	0.5	0.169	3.57289e-28	2	Kdm6b
Nfkbiz	4.94555e-32	0.897237	0.59	0.232	9.84214e-28	2	Nfkbiz
Pim1	1.63526e-31	1.00744	0.775	0.452	3.25432e-27	2	Pim1
Neurl3	2.61058e-31	0.920166	0.825	0.554	5.19531e-27	2	Neurl3
Klf2	5.54189e-31	1.37878	0.8	0.476	1.10289e-26	2	Klf2
Jund	6.43336e-31	0.773297	0.975	0.912	1.2803e-26	2	Jund
Dusp5	1.01406e-29	0.861494	0.565	0.232	2.01809e-25	2	Dusp5
Mxd1	1.68763e-29	0.792871	0.455	0.145	3.35855e-25	2	Mxd1
Hspe1	1.98124e-29	1.1092	0.92	0.845	3.94287e-25	2	Hspe1
Hsp90ab1	2.96128e-29	0.733444	0.985	0.972	5.89324e-25	2	Hsp90ab1
Rgs2	8.56436e-29	0.930962	0.805	0.522	1.70439e-24	2	Rgs2
Tagap	1.26647e-27	0.768506	0.42	0.127	2.5204e-23	2	Tagap
Ifrd1	1.57917e-27	0.985635	0.615	0.303	3.1427e-23	2	Ifrd1
Hspd1	1.62119e-27	0.995939	0.805	0.58	3.22632e-23	2	Hspd1
Klf6	4.45339e-27	1.005	0.83	0.64	8.8627e-23	2	Klf6
Nr4a3	1.42946e-26	0.683006	0.28	0.051	2.84476e-22	2	Nr4a3
Ccrl2	5.73176e-26	0.626797	0.35	0.095	1.14068e-21	2	Ccrl2
Coq10b	5.11306e-25	0.66116	0.395	0.127	1.01755e-20	2	Coq10b
Gna13	7.931e-25	0.76633	0.705	0.451	1.57835e-20	2	Gna13
Cdkn1a	1.16378e-24	0.541369	0.265	0.046	2.31604e-20	2	Cdkn1a
Ier5	3.09076e-24	0.773781	0.795	0.548	6.15092e-20	2	Ier5
H3f3b	9.33481e-24	0.550996	0.995	0.975	1.85772e-19	2	H3f3b
Csrnp1	1.10387e-23	0.619624	0.38	0.115	2.1968e-19	2	Csrnp1
Hspa1a	7.25895e-23	1.2916	0.78	0.706	1.4446e-18	2	Hspa1a
Ppp1r15a	6.54965e-22	0.718889	0.71	0.407	1.30345e-17	2	Ppp1r15a
Cd69	1.04034e-21	0.999807	0.595	0.317	2.07039e-17	2	Cd69
Mcl1	4.12362e-21	0.638127	0.87	0.721	8.20642e-17	2	Mcl1
Frat2	1.55516e-20	0.45452	0.275	0.064	3.09492e-16	2	Frat2
Ifngr1	5.78557e-20	0.520143	0.905	0.791	1.15139e-15	2	Ifngr1
Atf3	1.74727e-19	1.04199	0.245	0.055	3.47725e-15	2	Atf3
Cebpb	5.77353e-19	0.855985	0.6	0.363	1.14899e-14	2	Cebpb
Gramd3	6.04651e-19	0.693483	0.68	0.439	1.20332e-14	2	Gramd3
Sik1	1.34871e-18	0.515552	0.33	0.109	2.68407e-14	2	Sik1
Zfp36l2	2.22492e-18	0.642232	0.87	0.782	4.42782e-14	2	Zfp36l2
Tgif1	1.28837e-17	0.498155	0.265	0.071	2.56398e-13	2	Tgif1
Dusp10	1.44941e-17	0.560294	0.345	0.118	2.88448e-13	2	Dusp10
Dusp2	1.47299e-17	0.940341	0.71	0.479	2.93139e-13	2	Dusp2
Phlda1	1.93631e-17	1.09733	0.495	0.237	3.85346e-13	2	Phlda1
Eif1	6.55232e-17	0.282934	1	0.988	1.30398e-12	2	Eif1
Gm17056	2.72441e-16	0.451782	0.2	0.045	5.42185e-12	2	Gm17056
Zc3h12a	2.7601e-16	0.476292	0.275	0.086	5.49288e-12	2	Zc3h12a
Fos	5.3968e-16	0.836945	0.595	0.366	1.07402e-11	2	Fos
Herpud1	1.19221e-15	0.583724	0.48	0.26	2.37261e-11	2	Herpud1
Hspa1b	1.66696e-15	0.879948	0.805	0.782	3.31741e-11	2	Hspa1b
Socs3	2.0043e-15	0.624573	0.43	0.2	3.98876e-11	2	Socs3
Jun	3.33022e-15	0.722568	0.81	0.676	6.62748e-11	2	Jun
Icos	7.71282e-15	0.683019	0.46	0.224	1.53493e-10	2	Icos
Ptp4a1	2.08248e-14	0.489205	0.47	0.255	4.14434e-10	2	Ptp4a1
Ftl1	3.9901e-14	0.326973	0.975	0.967	7.9407e-10	2	Ftl1
Clk1	4.24809e-14	0.547769	0.59	0.376	8.45412e-10	2	Clk1
P2ry10	4.36574e-14	0.636621	0.525	0.324	8.68827e-10	2	P2ry10
Srgn	5.42685e-14	0.395918	0.985	0.968	1.08e-09	2	Srgn
Zfp36l1	5.53314e-14	0.710837	0.785	0.683	1.10115e-09	2	Zfp36l1
Cacybp	5.77233e-14	0.569668	0.685	0.571	1.14875e-09	2	Cacybp
Gm37248	7.83258e-14	0.527455	0.44	0.208	1.55876e-09	2	Gm37248
Litaf1	9.08594e-14	0.609625	0.52	0.323	1.80819e-09	2	Litaf
Tob2	3.58405e-13	0.528819	0.43	0.226	7.13262e-09	2	Tob2
Ifng	3.72354e-13	1.13637	0.43	0.229	7.41021e-09	2	Ifng
Serpinb6b	3.73342e-13	0.723359	0.425	0.223	7.42988e-09	2	Serpinb6b
Zbtb10	4.90309e-13	0.318443	0.175	0.041	9.75763e-09	2	Zbtb10
Rgs11	8.27513e-13	0.870607	0.675	0.506	1.64683e-08	2	Rgs1
Zfp36	1.04469e-12	0.75006	0.495	0.287	2.07903e-08	2	Zfp36
Ddx5	1.17089e-12	0.313213	0.985	0.966	2.33019e-08	2	Ddx5
Cd28	2.73185e-12	0.607414	0.595	0.409	5.43666e-08	2	Cd28
H60b	3.69879e-12	0.300736	0.17	0.044	7.36097e-08	2	H60b
Nfkbid	4.48466e-12	0.590031	0.31	0.13	8.92492e-08	2	Nfkbid
Cytip	4.52883e-12	0.408352	0.79	0.684	9.01282e-08	2	Cytip
Gpr132	4.54074e-12	0.454275	0.41	0.208	9.03652e-08	2	Gpr132
Crem	1.46212e-11	0.656249	0.405	0.221	2.90976e-07	2	Crem
Satb1	1.49132e-11	0.488146	0.74	0.634	2.96787e-07	2	Satb1
Stk17b	1.97126e-11	0.3852	0.89	0.85	3.923e-07	2	Stk17b
Gla	2.09904e-11	0.282485	0.155	0.038	4.1773e-07	2	Gla
Ramp3	2.14808e-11	0.288539	0.11	0.016	4.27489e-07	2	Ramp3
Tsc22d3	4.06935e-11	0.588683	0.44	0.234	8.09842e-07	2	Tsc22d3
Per1	6.30867e-11	0.376148	0.22	0.076	1.25549e-06	2	Per1
Rnf138	1.54565e-10	0.476762	0.565	0.392	3.076e-06	2	Rnf138
C920009B18Rik	1.65102e-10	0.3452	0.235	0.087	3.28569e-06	2	C920009B18Rik
Ets2	1.87685e-10	0.3856	0.23	0.086	3.73512e-06	2	Ets2
Samsn1	1.9746e-10	0.537532	0.485	0.312	3.92965e-06	2	Samsn1
Gm26532	2.16848e-10	0.46696	0.26	0.108	4.3155e-06	2	Gm26532
Hspa5	2.34912e-10	0.420068	0.84	0.773	4.67498e-06	2	Hspa5
Sertad1	2.5305e-10	0.44077	0.305	0.147	5.03594e-06	2	Sertad1
Gpr183	2.78784e-10	0.622357	0.515	0.324	5.54809e-06	2	Gpr183
Map3k8	3.02829e-10	0.415974	0.31	0.153	6.02659e-06	2	Map3k8
Snx18	3.43648e-10	0.441252	0.345	0.176	6.83894e-06	2	Snx18
Slc5a3	4.31348e-10	0.414423	0.235	0.092	8.58425e-06	2	Slc5a3
1810026B05Rik	5.77063e-10	0.390601	0.745	0.624	1.14841e-05	2	1810026B05Rik
Gem	7.36013e-10	0.672667	0.595	0.439	1.46474e-05	2	Gem
Lncpint	7.93484e-10	0.37261	0.28	0.118	1.57911e-05	2	Lncpint
Traf4	8.73363e-10	0.428442	0.23	0.093	1.73808e-05	2	Traf4
Ube2b	1.18409e-09	0.406306	0.73	0.643	2.35647e-05	2	Ube2b
Myc	1.68686e-09	0.594309	0.415	0.245	3.35702e-05	2	Myc
Ddit3	1.91427e-09	0.449685	0.315	0.155	3.80958e-05	2	Ddit3
Bcl2l11	2.30161e-09	0.544765	0.49	0.324	4.58044e-05	2	Bcl2l11
Gm12346	2.45351e-09	0.320929	0.195	0.072	4.88273e-05	2	Gm12346
Chchd2	2.68685e-09	0.344569	0.935	0.89	5.3471e-05	2	Chchd2
Tob1	3.8549e-09	0.475661	0.32	0.162	7.67163e-05	2	Tob1
Rhob	4.51113e-09	0.507449	0.42	0.259	8.97761e-05	2	Rhob
Orai1	6.22128e-09	0.481602	0.375	0.219	0.00012381	2	Orai1
Gm15542	6.34815e-09	0.409097	0.21	0.082	0.000126335	2	Gm15542
Nfil3	8.07246e-09	0.460478	0.325	0.184	0.00016065	2	Nfil3
Rel	9.37858e-09	0.489996	0.42	0.255	0.000186643	2	Rel
Irak2	1.35028e-08	0.340303	0.235	0.101	0.000268719	2	Irak2
Tuba4a	1.45168e-08	0.458697	0.375	0.229	0.000288899	2	Tuba4a
Slc3a2	1.79761e-08	0.457718	0.67	0.568	0.000357742	2	Slc3a2
Dnajb9	2.25453e-08	0.396852	0.28	0.134	0.000448675	2	Dnajb9
Fosb	2.26364e-08	0.28698	0.185	0.068	0.000450487	2	Fosb
Dgat1	2.32215e-08	0.394313	0.19	0.077	0.00046213	2	Dgat1
Rora	2.44376e-08	0.3267	0.3	0.136	0.000486332	2	Rora
Plcxd2	2.69699e-08	0.354981	0.38	0.219	0.000536728	2	Plcxd2
Gm43430	3.14626e-08	0.315508	0.225	0.097	0.000626138	2	Gm43430
Rnf125	3.43813e-08	0.441771	0.425	0.271	0.000684222	2	Rnf125
Serpinb9	4.32637e-08	0.567964	0.395	0.252	0.000860991	2	Serpinb9
Klf9	4.36231e-08	0.302784	0.16	0.05	0.000868144	2	Klf9
Swt1	4.42058e-08	0.390714	0.38	0.229	0.000879741	2	Swt1
Slc38a2	5.00879e-08	0.445156	0.545	0.423	0.0009968	2	Slc38a2
Pde4b	6.26235e-08	0.389143	0.4	0.25	0.00124627	2	Pde4b
C230085N15Rik	7.59466e-08	0.40497	0.42	0.264	0.00151141	2	C230085N15Rik
Gpbp1	7.95631e-08	0.357944	0.565	0.459	0.00158339	2	Gpbp1
Nabp1	1.14091e-07	0.389231	0.455	0.324	0.00227052	2	Nabp1
Birc3	1.37171e-07	0.476584	0.3	0.163	0.00272985	2	Birc3
Tra2b	1.45427e-07	0.456861	0.63	0.554	0.00289413	2	Tra2b
Gm37033	1.4728e-07	0.477984	0.5	0.347	0.00293101	2	Gm37033
A630081D01Rik	1.48284e-07	0.355687	0.415	0.261	0.002951	2	A630081D01Rik
E430014B02Rik	1.51044e-07	0.300594	0.285	0.14	0.00300592	2	E430014B02Rik
Rrad	1.54736e-07	0.440928	0.23	0.109	0.0030794	2	Rrad
Tnfsf9	1.9193e-07	0.477575	0.12	0.036	0.0038196	2	Tnfsf9
Zc3hav1	2.01457e-07	0.459295	0.58	0.474	0.00400919	2	Zc3hav1
Sqstm1	2.0554e-07	0.524019	0.42	0.298	0.00409046	2	Sqstm1
Peli1	2.90313e-07	0.34884	0.71	0.631	0.00577751	2	Peli1
Fam46c	3.17842e-07	0.35889	0.31	0.168	0.00632537	2	Fam46c
Skil	3.518e-07	0.352913	0.44	0.294	0.00700117	2	Skil
Ccl4	5.0409e-07	1.1811	0.38	0.244	0.0100319	2	Ccl4
Oser1	5.80268e-07	0.329437	0.385	0.253	0.0115479	2	Oser1
Gm20186	6.04728e-07	0.41312	0.31	0.171	0.0120347	2	Gm20186
Ubald2	6.53706e-07	0.470735	0.54	0.46	0.0130094	2	Ubald2
P4ha1	7.49934e-07	0.361855	0.26	0.139	0.0149244	2	P4ha1
Spry2	1.06386e-06	0.588501	0.35	0.227	0.0211719	2	Spry2
5830444F18Rik	1.11617e-06	0.489913	0.445	0.301	0.0222129	2	5830444F18Rik
Sgk1	1.39771e-06	0.415092	0.26	0.13	0.0278159	2	Sgk1
Dedd2	1.56209e-06	0.303896	0.24	0.126	0.0310871	2	Dedd2
Il4ra	1.6879e-06	0.387347	0.375	0.249	0.033591	2	Il4ra
Gm44292	2.15884e-06	0.346379	0.265	0.143	0.0429631	2	Gm44292
Amd1	2.22703e-06	0.443388	0.25	0.145	0.0443201	2	Amd1
Dnaja4	2.38637e-06	0.355862	0.155	0.066	0.0474911	2	Dnaja4
Nr3c1	2.68957e-06	0.355877	0.485	0.375	0.0535251	2	Nr3c1
C230096K16Rik	2.75275e-06	0.408041	0.31	0.175	0.0547824	2	C230096K16Rik
Ahsa1	2.95415e-06	0.385013	0.54	0.444	0.0587906	2	Ahsa1
Emb1	4.02452e-06	0.435434	0.675	0.583	0.080092	2	Emb
Bcl10	5.34478e-06	0.383998	0.39	0.277	0.106366	2	Bcl10
Atf4	5.95191e-06	0.368555	0.595	0.5	0.118449	2	Atf4
Saraf	6.15889e-06	0.307993	0.635	0.566	0.122568	2	Saraf
Spag9	6.86219e-06	0.35824	0.345	0.23	0.136564	2	Spag9
Sap30	7.45028e-06	0.363923	0.19	0.094	0.148268	2	Sap30
Ugcg	7.63276e-06	0.391022	0.605	0.543	0.1519	2	Ugcg
Ndel1	7.99979e-06	0.357025	0.375	0.265	0.159204	2	Ndel1
Smad7	8.76082e-06	0.404718	0.64	0.549	0.174349	2	Smad7
Gm36933	9.59785e-06	0.274751	0.165	0.081	0.191007	2	Gm36933
Sdhaf1	9.59934e-06	0.303562	0.32	0.2	0.191036	2	Sdhaf1
Stat3	1.10876e-05	0.349193	0.52	0.432	0.220654	2	Stat3
Ube2s	1.25757e-05	0.293928	0.605	0.539	0.250269	2	Ube2s
Gm37728	1.28297e-05	0.259903	0.2	0.096	0.255324	2	Gm37728
Bhlhe40	1.48038e-05	0.391488	0.365	0.265	0.294611	2	Bhlhe40
Pim3	1.52905e-05	0.325216	0.225	0.121	0.304296	2	Pim3
Ccdc117	1.70177e-05	0.323665	0.24	0.134	0.338669	2	Ccdc117
Gm43362	2.05282e-05	0.315441	0.335	0.227	0.408531	2	Gm43362
Dnajb4	2.14195e-05	0.355529	0.365	0.234	0.426269	2	Dnajb4
Bag3	2.33485e-05	0.265479	0.11	0.04	0.464659	2	Bag3
Gm37390	2.49646e-05	0.276652	0.23	0.129	0.496821	2	Gm37390
Tmed5	2.72077e-05	0.308604	0.61	0.502	0.54146	2	Tmed5
Ube2j1	3.19092e-05	0.2814	0.325	0.209	0.635025	2	Ube2j1
Gm37510	3.39224e-05	0.26913	0.19	0.097	0.675089	2	Gm37510
Icam1	4.11154e-05	0.392059	0.33	0.228	0.818238	2	Icam1
Gm15459	4.26152e-05	0.351458	0.315	0.213	0.848085	2	Gm15459
Arl4a	5.12363e-05	0.349479	0.38	0.276	1	2	Arl4a
Dnajb6	5.29264e-05	0.254661	0.655	0.598	1	2	Dnajb6
Gm38062	5.37385e-05	0.362996	0.38	0.285	1	2	Gm38062
Elf1	6.0584e-05	0.297334	0.68	0.635	1	2	Elf1
Ptger4	7.27788e-05	0.297279	0.16	0.077	1	2	Ptger4
B130021K23Rik	7.44279e-05	0.280465	0.19	0.093	1	2	B130021K23Rik
Dyrk2	0.000100474	0.318439	0.33	0.231	1	2	Dyrk2
Siah2	0.000101103	0.302646	0.175	0.095	1	2	Siah2
Ubl3	0.000119115	0.321212	0.35	0.252	1	2	Ubl3
Pik3r1	0.000126377	0.37225	0.415	0.329	1	2	Pik3r1
Dbf4	0.000135174	0.279641	0.205	0.122	1	2	Dbf4
Snhg5	0.000140288	0.272053	0.2	0.12	1	2	Snhg5
Irf2bp2	0.000151046	0.364738	0.485	0.414	1	2	Irf2bp2
Tnfrsf1b	0.000151947	0.359161	0.275	0.188	1	2	Tnfrsf1b
Amz2	0.00015795	0.277366	0.2	0.115	1	2	Amz2
Ptp4a2	0.000170037	0.257769	0.795	0.807	1	2	Ptp4a2
Filip1l	0.00017426	0.357474	0.24	0.153	1	2	Filip1l
Ctla2a1	0.000178931	0.489698	0.845	0.818	1	2	Ctla2a
Rsbn1l	0.000181837	0.253436	0.605	0.553	1	2	Rsbn1l
Metrnl	0.000198977	0.295556	0.26	0.171	1	2	Metrnl
Hist1h1c	0.000265633	0.549279	0.28	0.189	1	2	Hist1h1c
Got1	0.00030787	0.36253	0.245	0.169	1	2	Got1
Prr7	0.000325673	0.294807	0.18	0.104	1	2	Prr7
Suco	0.000329796	0.274701	0.295	0.216	1	2	Suco
Fasl	0.000358106	0.356901	0.325	0.239	1	2	Fasl
Hspa4l	0.000372952	0.338998	0.165	0.094	1	2	Hspa4l
Traf1	0.000382196	0.327451	0.37	0.292	1	2	Traf1
Klf3	0.000385589	0.338765	0.26	0.163	1	2	Klf3
Fam46a	0.000423997	0.449445	0.495	0.424	1	2	Fam46a
Prkx	0.000481423	0.342715	0.27	0.189	1	2	Prkx
Pmepa1	0.000497965	0.436955	0.505	0.438	1	2	Pmepa1
Dennd4a	0.000514408	0.255567	0.425	0.348	1	2	Dennd4a
Gm45716	0.000646528	0.522457	0.29	0.219	1	2	Gm45716
Sertad2	0.000716303	0.263816	0.365	0.277	1	2	Sertad2
Xcl11	0.000745576	0.476226	0.795	0.797	1	2	Xcl1
Polr2a	0.000777858	0.257163	0.37	0.296	1	2	Polr2a
Isy1	0.000811507	0.369212	0.415	0.361	1	2	Isy1
Bex3	0.00102982	0.253083	0.435	0.366	1	2	Bex3
Vgll4	0.00135406	0.349574	0.37	0.284	1	2	Vgll4
Cited2	0.00136428	0.274227	0.43	0.327	1	2	Cited2
B4galt1	0.0014194	0.356939	0.42	0.346	1	2	B4galt1
Klrc2	0.00150603	0.296638	0.365	0.278	1	2	Klrc2
Cggbp1	0.00156521	0.319944	0.475	0.424	1	2	Cggbp1
Serp1	0.00158029	0.261425	0.505	0.478	1	2	Serp1
Tmem64	0.00172547	0.259177	0.215	0.131	1	2	Tmem64
Slfn2	0.00174009	0.259526	0.685	0.639	1	2	Slfn2
Wdr26	0.00185069	0.260318	0.465	0.42	1	2	Wdr26
Cnot6l	0.00189937	0.286559	0.575	0.533	1	2	Cnot6l
Kctd12	0.0027501	0.306658	0.285	0.208	1	2	Kctd12
Ccr5	0.00279679	0.313896	0.385	0.304	1	2	Ccr5
Ccnl1	0.00346038	0.266363	0.455	0.395	1	2	Ccnl1
Ahr	0.0035205	0.311739	0.375	0.314	1	2	Ahr
Odc1	0.00367539	0.285728	0.305	0.239	1	2	Odc1
Ptpn22	0.00391691	0.25981	0.57	0.56	1	2	Ptpn22
Hilpda	0.00402938	0.318523	0.23	0.169	1	2	Hilpda
Tgoln1	0.00579149	0.258149	0.515	0.472	1	2	Tgoln1
Prkca	0.00582038	0.294122	0.345	0.285	1	2	Prkca
Snhg12	0.00582467	0.254705	0.335	0.284	1	2	Snhg12
Cxcl10	0.00648702	0.511635	0.11	0.063	1	2	Cxcl10
Bcl2a1b	0.00664948	0.499514	0.295	0.241	1	2	Bcl2a1b
Gabarapl1	0.0070144	0.250827	0.18	0.122	1	2	Gabarapl1
Ccl3	0.0098725	0.355851	0.25	0.186	1	2	Ccl3
Ckb	1.58086e-34	0.623594	0.296	0.033	3.14606e-30	3	Ckb
Cd40lg	5.30692e-34	0.605805	0.333	0.048	1.05613e-29	3	Cd40lg
Cxcr6	5.96894e-33	1.02549	0.821	0.52	1.18788e-28	3	Cxcr6
Zbtb16	1.76475e-32	0.724925	0.364	0.068	3.51203e-28	3	Zbtb16
Lyst	6.29156e-31	1.05177	0.673	0.3	1.25208e-26	3	Lyst
Id2	1.25689e-30	0.851179	0.944	0.701	2.50133e-26	3	Id2
Podnl1	4.2878e-30	0.656233	0.327	0.051	8.53316e-26	3	Podnl1
Il4	9.38499e-29	0.364196	0.154	0.004	1.86771e-24	3	Il4
Maf	1.45654e-26	0.849385	0.333	0.071	2.89865e-22	3	Maf
Fth1	4.16398e-23	0.366054	0.994	0.997	8.28673e-19	3	Fth1
Rab27b	2.84224e-22	0.563145	0.253	0.041	5.65633e-18	3	Rab27b
Il6ra	6.09287e-22	0.344795	0.117	0.007	1.21254e-17	3	Il6ra
Icos1	3.64812e-21	0.750814	0.525	0.222	7.26012e-17	3	Icos
Sptssa	7.87153e-20	0.884142	0.704	0.528	1.56651e-15	3	Sptssa
Ccr2	1.99797e-19	0.725573	0.475	0.183	3.97616e-15	3	Ccr2
Anxa1	2.29122e-16	0.62994	0.463	0.187	4.55975e-12	3	Anxa1
Tnfrsf25	8.20615e-16	0.30744	0.123	0.015	1.63311e-11	3	Tnfrsf25
Gm26825	1.90815e-15	0.843195	0.84	0.715	3.79741e-11	3	Gm26825
Tmem641	4.5389e-15	0.60126	0.34	0.117	9.03287e-11	3	Tmem64
Gimap31	6.44944e-15	0.455561	0.932	0.93	1.2835e-10	3	Gimap3
Bcl11b	1.86799e-14	0.646305	0.574	0.313	3.71749e-10	3	Bcl11b
Inpp4b	5.78666e-14	0.588766	0.66	0.449	1.1516e-09	3	Inpp4b
Socs2	9.35654e-14	0.566272	0.272	0.086	1.86205e-09	3	Socs2
Hspa1b1	1.13949e-12	0.583281	0.889	0.771	2.2677e-08	3	Hspa1b
Sh3bgrl31	1.35494e-12	0.396797	0.988	0.937	2.69646e-08	3	Sh3bgrl3
Ppp1r15a1	5.80532e-12	0.605471	0.648	0.424	1.15532e-07	3	Ppp1r15a
Tesc	7.70266e-12	0.385663	0.259	0.08	1.53291e-07	3	Tesc
Rora1	1.32987e-11	0.514632	0.34	0.136	2.64657e-07	3	Rora
Cd53	1.39744e-11	0.362976	0.883	0.853	2.78104e-07	3	Cd53
Tmem176a	1.74239e-11	0.450898	0.185	0.046	3.46754e-07	3	Tmem176a
Ptpn18	1.9029e-11	0.305176	0.963	0.958	3.78697e-07	3	Ptpn18
Tmem154	2.87973e-11	0.253261	0.142	0.029	5.73095e-07	3	Tmem154
Txnip	4.07876e-11	0.664203	0.698	0.546	8.11714e-07	3	Txnip
Gm12840	7.1041e-11	0.800391	0.253	0.089	1.41379e-06	3	Gm12840
Hs3st3b1	1.33801e-10	0.403594	0.253	0.082	2.66277e-06	3	Hs3st3b1
Gimap4	4.64735e-10	0.343997	0.92	0.921	9.24869e-06	3	Gimap4
Cxcr3	1.01185e-09	0.473785	0.636	0.497	2.01368e-05	3	Cxcr3
Satb11	1.5109e-09	0.444434	0.759	0.635	3.00684e-05	3	Satb1
Arl4c	1.73789e-09	0.426495	0.691	0.55	3.45858e-05	3	Arl4c
Fyb	1.84321e-09	0.397109	0.821	0.748	3.66817e-05	3	Fyb
Izumo1r	2.99073e-09	0.44425	0.185	0.054	5.95186e-05	3	Izumo1r
Gm4208	1.46302e-08	0.420107	0.117	0.025	0.000291155	3	Gm4208
Tmem176b	1.50206e-08	0.611985	0.167	0.05	0.000298924	3	Tmem176b
Lmo4	1.53402e-08	0.422275	0.179	0.057	0.000305285	3	Lmo4
Tbc1d4	1.88664e-08	0.37855	0.142	0.038	0.00037546	3	Tbc1d4
Ifi27l2a	2.15649e-08	0.731058	0.722	0.637	0.000429163	3	Ifi27l2a
Il18r11	3.36551e-08	0.491756	0.605	0.411	0.000669771	3	Il18r1
F2rl2	1.65855e-07	0.267292	0.117	0.028	0.00330067	3	F2rl2
Gm201861	2.33799e-07	0.474931	0.321	0.173	0.00465283	3	Gm20186
Hspa1a1	2.5596e-07	0.416831	0.765	0.71	0.00509387	3	Hspa1a
Dnajb11	2.59276e-07	0.453441	0.66	0.503	0.00515985	3	Dnajb1
Gimap9	5.87374e-07	0.408602	0.636	0.538	0.0116893	3	Gimap9
Pim11	1.13775e-06	0.495814	0.593	0.486	0.0226423	3	Pim1
Serinc3	1.51668e-06	0.403526	0.735	0.686	0.0301835	3	Serinc3
Rcbtb2	1.52703e-06	0.319453	0.284	0.154	0.0303895	3	Rcbtb2
Cd82	1.84943e-06	0.367751	0.58	0.457	0.0368055	3	Cd82
2020-06-01	5.51371e-06	0.483027	0.753	0.687	0.109728	3	Jun
Btg21	5.95767e-06	0.441092	0.833	0.779	0.118564	3	Btg2
Ubc1	6.02482e-06	0.469695	0.679	0.609	0.1199	3	Ubc
Gimap6	1.26994e-05	0.256462	0.84	0.831	0.25273	3	Gimap6
Nr3c11	1.49948e-05	0.374339	0.488	0.378	0.298412	3	Nr3c1
Pde4b1	1.63644e-05	0.381692	0.37	0.258	0.325667	3	Pde4b
Itgb3	1.8363e-05	0.284692	0.16	0.069	0.365442	3	Itgb3
Klf61	2.66704e-05	0.326468	0.728	0.66	0.530767	3	Klf6
Cd6	2.67036e-05	0.368484	0.272	0.161	0.531427	3	Cd6
5830444F18Rik1	3.23925e-05	0.358064	0.444	0.305	0.644644	3	5830444F18Rik
Cited21	3.3328e-05	0.613176	0.438	0.329	0.663261	3	Cited2
Hif1a	4.95261e-05	0.375467	0.432	0.332	0.985618	3	Hif1a
Ccnd2	6.79809e-05	0.294411	0.79	0.723	1	3	Ccnd2
Pde3b	8.35023e-05	0.384307	0.512	0.449	1	3	Pde3b
Wwp1	0.000115368	0.323337	0.222	0.124	1	3	Wwp1
Ccnd3	0.000116936	0.38192	0.543	0.466	1	3	Ccnd3
S100a10	0.000120206	0.259488	0.92	0.945	1	3	S100a10
Apbb1ip	0.000120471	0.278262	0.58	0.489	1	3	Apbb1ip
Dusp11	0.000129108	0.51052	0.451	0.331	1	3	Dusp1
Mbp	0.00014448	0.428103	0.414	0.307	1	3	Mbp
Rtf1	0.000165885	0.29554	0.593	0.518	1	3	Rtf1
Arl4d	0.000183142	0.36817	0.272	0.152	1	3	Arl4d
Rassf5	0.000184511	0.387516	0.562	0.489	1	3	Rassf5
C230085N15Rik1	0.000204353	0.409936	0.389	0.273	1	3	C230085N15Rik
Gm442921	0.000207982	0.328437	0.253	0.148	1	3	Gm44292
Gpsm3	0.000214782	0.287596	0.71	0.705	1	3	Gpsm3
Il7r1	0.000298483	0.282337	0.519	0.396	1	3	Il7r
Irf2bp21	0.000306775	0.268671	0.5	0.414	1	3	Irf2bp2
Gata3	0.000311632	0.391068	0.395	0.299	1	3	Gata3
Cd5	0.000365415	0.28841	0.247	0.149	1	3	Cd5
Atp2b1	0.000366559	0.31707	0.549	0.493	1	3	Atp2b1
Lbh	0.000369273	0.275665	0.5	0.439	1	3	Lbh
Gm372481	0.000456083	0.308479	0.333	0.23	1	3	Gm37248
Prkcq	0.000535155	0.302553	0.444	0.367	1	3	Prkcq
9930111J21Rik2	0.000597806	0.349381	0.383	0.295	1	3	9930111J21Rik2
Gm11478	0.000637844	0.259052	0.66	0.638	1	3	Gm11478
Slfn1	0.000643894	0.363463	0.346	0.253	1	3	Slfn1
Kctd121	0.000714104	0.290285	0.309	0.207	1	3	Kctd12
Thy11	0.000805581	0.267987	0.759	0.691	1	3	Thy1
Aak1	0.000966344	0.304115	0.438	0.353	1	3	Aak1
Zfp361	0.00100706	0.335518	0.401	0.306	1	3	Zfp36
Sit1	0.0011061	0.269941	0.21	0.125	1	3	Sit1
Fgl21	0.00113393	0.348523	0.611	0.574	1	3	Fgl2
Arhgap15	0.00135646	0.312457	0.543	0.454	1	3	Arhgap15
Adgre5	0.00182254	0.267927	0.457	0.375	1	3	Adgre5
Cdk2ap2	0.00220492	0.276866	0.642	0.632	1	3	Cdk2ap2
Cnot6l1	0.002355	0.272159	0.562	0.536	1	3	Cnot6l
Fam107b	0.00277799	0.294762	0.611	0.577	1	3	Fam107b
Cd44	0.00299425	0.316043	0.333	0.248	1	3	Cd44
Tcrg-C41	0.00303877	0.43172	0.451	0.397	1	3	Tcrg-C4
Slfn21	0.00312144	0.253866	0.654	0.644	1	3	Slfn2
Cmtm6	0.00365813	0.252337	0.296	0.212	1	3	Cmtm6
Churc1	0.00487289	0.284437	0.512	0.458	1	3	Churc1
Lpar6	0.00596631	0.271907	0.296	0.218	1	3	Lpar6
mt-Atp6	0.0065884	0.362416	0.586	0.594	1	3	mt-Atp6
Itgal	0.00818085	0.288662	0.537	0.531	1	3	Itgal
E2f1	2.53407e-119	0.597678	0.696	0.02	5.04306e-115	4	E2f1
Cdca7	1.28783e-114	0.693196	0.794	0.047	2.5629e-110	4	Cdca7
Gins2	1.38543e-109	0.558069	0.676	0.026	2.75714e-105	4	Gins2
Lig1	1.8158e-107	0.98847	0.892	0.076	3.61363e-103	4	Lig1
Ung	2.29692e-102	0.661844	0.725	0.036	4.57111e-98	4	Ung
Stmn1	2.6825e-100	1.69342	0.971	0.13	5.33844e-96	4	Stmn1
Dhfr	9.83796e-99	0.747186	0.735	0.04	1.95785e-94	4	Dhfr
Uhrf1	1.00385e-96	0.667937	0.657	0.026	1.99776e-92	4	Uhrf1
Mcm3	2.74238e-95	0.897387	0.941	0.101	5.45761e-91	4	Mcm3
Hells	1.27359e-94	0.920014	0.853	0.085	2.53457e-90	4	Hells
Mcm5	1.08346e-93	0.926554	0.902	0.09	2.1562e-89	4	Mcm5
Apitd1	1.38352e-92	0.498013	0.647	0.032	2.75335e-88	4	Apitd1
Rad51	7.35739e-89	0.419658	0.48	0.011	1.46419e-84	4	Rad51
Mcm2	6.23788e-87	0.734905	0.863	0.096	1.2414e-82	4	Mcm2
Top2a	5.62035e-86	0.79532	0.716	0.057	1.11851e-81	4	Top2a
Tcf19	6.47535e-86	0.458317	0.52	0.017	1.28866e-81	4	Tcf19
Mcm6	1.03178e-83	0.991732	0.941	0.134	2.05335e-79	4	Mcm6
Asf1b	3.67825e-83	0.545489	0.529	0.019	7.32008e-79	4	Asf1b
Cdc6	6.6436e-83	0.358955	0.392	0.003	1.32214e-78	4	Cdc6
Syce2	3.42059e-82	0.492114	0.588	0.033	6.80732e-78	4	Syce2
Cdc45	4.03927e-82	0.43659	0.48	0.012	8.03855e-78	4	Cdc45
Spc24	1.69687e-79	0.578388	0.549	0.03	3.37695e-75	4	Spc24
Gmnn	2.27777e-77	0.815993	0.824	0.108	4.533e-73	4	Gmnn
Rad51ap1	8.77535e-77	0.388268	0.412	0.006	1.74638e-72	4	Rad51ap1
Dscc1	1.47501e-76	0.333049	0.402	0.009	2.93542e-72	4	Dscc1
Fignl1	2.05866e-75	0.401539	0.461	0.014	4.09695e-71	4	Fignl1
Pclaf	7.50634e-75	1.31579	0.647	0.054	1.49384e-70	4	Pclaf
Chaf1a	1.62311e-74	0.394041	0.451	0.015	3.23015e-70	4	Chaf1a
Tk1	1.37571e-73	0.609051	0.52	0.029	2.7378e-69	4	Tk1
Mcm7	9.92979e-73	0.801577	0.804	0.101	1.97613e-68	4	Mcm7
Cenph	2.14152e-72	0.429058	0.441	0.016	4.26184e-68	4	Cenph
Clspn	2.67891e-72	0.543815	0.52	0.026	5.3313e-68	4	Clspn
Rrm2	9.94263e-72	0.782508	0.49	0.023	1.97868e-67	4	Rrm2
Prim1	2.37904e-71	0.533755	0.676	0.059	4.73453e-67	4	Prim1
Pole	3.59965e-71	0.345555	0.431	0.013	7.16366e-67	4	Pole
Tyms	4.35407e-71	0.717054	0.667	0.061	8.66504e-67	4	Tyms
Psmc3ip	4.81844e-70	0.379681	0.48	0.019	9.58917e-66	4	Psmc3ip
Rfc3	5.13893e-70	0.584724	0.735	0.069	1.0227e-65	4	Rfc3
Nmral1	1.02433e-68	0.355708	0.529	0.03	2.03853e-64	4	Nmral1
Dtl	1.85218e-67	0.285121	0.343	0.005	3.68603e-63	4	Dtl
Dut	2.02136e-65	1.31593	0.971	0.306	4.02271e-61	4	Dut
Chek1	5.52003e-65	0.365763	0.412	0.015	1.09854e-60	4	Chek1
Pola1	7.93324e-65	0.436317	0.549	0.037	1.57879e-60	4	Pola1
Siva1	9.26612e-64	0.732955	0.853	0.147	1.84405e-59	4	Siva1
Tipin	1.38685e-62	0.800444	0.882	0.156	2.75997e-58	4	Tipin
Rfc5	4.73705e-61	0.514476	0.735	0.091	9.4272e-57	4	Rfc5
Dctpp1	4.8675e-61	0.779204	0.882	0.163	9.68682e-57	4	Dctpp1
Chaf1b	5.19284e-60	0.365813	0.51	0.035	1.03343e-55	4	Chaf1b
Rfc4	6.18161e-60	0.588729	0.735	0.102	1.2302e-55	4	Rfc4
Cdk1	1.43899e-59	0.408539	0.431	0.022	2.86373e-55	4	Cdk1
Cks1b	5.17375e-59	0.686784	0.686	0.082	1.02963e-54	4	Cks1b
Hirip3	2.10251e-57	0.343931	0.559	0.052	4.1842e-53	4	Hirip3
Ezh2	4.66706e-57	0.64947	0.755	0.104	9.28792e-53	4	Ezh2
Cenpw	4.68261e-57	0.615059	0.775	0.114	9.31886e-53	4	Cenpw
Orc6	1.32227e-56	0.51584	0.676	0.087	2.63145e-52	4	Orc6
Timeless	3.488e-56	0.348375	0.451	0.03	6.94147e-52	4	Timeless
Rmi2	4.72982e-56	0.456867	0.676	0.081	9.41281e-52	4	Rmi2
Ccne1	1.44328e-55	0.330398	0.471	0.031	2.87227e-51	4	Ccne1
Tfdp1	6.5607e-55	0.594355	0.775	0.121	1.30564e-50	4	Tfdp1
Slc29a1	2.60258e-54	0.435102	0.657	0.082	5.1794e-50	4	Slc29a1
Lmnb1	2.78296e-54	0.656955	0.794	0.133	5.53837e-50	4	Lmnb1
Cenpm	5.40098e-54	0.311069	0.363	0.013	1.07485e-49	4	Cenpm
Mcm4	8.61818e-54	0.647148	0.843	0.153	1.7151e-49	4	Mcm4
Fabp5	7.10835e-53	0.776949	0.735	0.126	1.41463e-48	4	Fabp5
Cbx5	9.35793e-53	0.616354	0.843	0.155	1.86232e-48	4	Cbx5
Rnaseh2b	1.11198e-52	0.346086	0.529	0.055	2.21295e-48	4	Rnaseh2b
Ptma	1.18106e-52	0.869806	1	0.996	2.35042e-48	4	Ptma
Nrm	2.17702e-52	0.490073	0.647	0.08	4.33249e-48	4	Nrm
Fen1	3.37405e-52	0.525346	0.676	0.091	6.7147e-48	4	Fen1
Nasp	7.93328e-52	0.760598	0.951	0.236	1.5788e-47	4	Nasp
Cenpk	1.04555e-51	0.26037	0.353	0.016	2.08075e-47	4	Cenpk
Rpa2	2.65408e-51	0.498407	0.784	0.115	5.28188e-47	4	Rpa2
Ranbp1	1.86473e-49	1.07736	1	0.564	3.711e-45	4	Ranbp1
Akip1	4.89193e-49	0.25603	0.51	0.055	9.73543e-45	4	Akip1
Apex1	2.04297e-48	0.580413	0.745	0.126	4.06572e-44	4	Apex1
Ppia	2.31714e-48	0.626915	1	0.995	4.61134e-44	4	Ppia
Eno3	1.28045e-47	0.676479	0.667	0.106	2.54821e-43	4	Eno3
Ran1	2.51806e-46	0.942187	1	0.762	5.01118e-42	4	Ran
Tuba1b	6.86759e-46	1.20484	0.961	0.332	1.36672e-41	4	Tuba1b
Rrm1	1.46132e-45	0.492375	0.578	0.084	2.90818e-41	4	Rrm1
Cisd1	2.26783e-45	0.584286	0.843	0.189	4.51321e-41	4	Cisd1
Ipo5	8.01185e-45	0.400331	0.696	0.108	1.59444e-40	4	Ipo5
Ncapg2	2.16032e-44	0.266541	0.314	0.016	4.29925e-40	4	Ncapg2
Wdr76	1.23372e-43	0.351341	0.578	0.069	2.45523e-39	4	Wdr76
Samd1	2.15927e-43	0.360638	0.529	0.065	4.29716e-39	4	Samd1
Atad5	2.6717e-43	0.267287	0.382	0.027	5.31695e-39	4	Atad5
Pcna	1.19393e-42	0.643953	0.824	0.194	2.37603e-38	4	Pcna
Smc2	1.2777e-42	0.643925	0.755	0.155	2.54275e-38	4	Smc2
Fbxo5	2.99136e-42	0.319759	0.353	0.027	5.95311e-38	4	Fbxo5
Dtymk	5.66266e-42	0.684931	0.902	0.256	1.12693e-37	4	Dtymk
Ybx1	2.24242e-41	0.785563	1	0.9	4.46265e-37	4	Ybx1
Mki67	4.91426e-41	0.429298	0.431	0.043	9.77987e-37	4	Mki67
Hat1	3.38111e-40	0.473419	0.755	0.151	6.72875e-36	4	Hat1
Mb21d1	8.52797e-40	0.270976	0.48	0.054	1.69715e-35	4	Mb21d1
Nup43	1.83119e-39	0.333237	0.539	0.078	3.64425e-35	4	Nup43
Ppil1	3.43808e-39	0.374443	0.598	0.099	6.84211e-35	4	Ppil1
Pold1	9.00227e-39	0.259488	0.48	0.057	1.79154e-34	4	Pold1
Ldha1	1.54928e-38	0.866179	1	0.748	3.08321e-34	4	Ldha
Umps	8.96868e-38	0.347257	0.608	0.098	1.78486e-33	4	Umps
Hmgn2	1.91404e-37	0.698469	0.892	0.269	3.80913e-33	4	Hmgn2
Phgdh	2.15855e-37	0.618661	0.833	0.224	4.29573e-33	4	Phgdh
Snrpd1	6.79473e-37	0.785053	0.98	0.449	1.35222e-32	4	Snrpd1
Mif1	1.80072e-36	0.869111	1	0.712	3.58361e-32	4	Mif
Impa2	2.076e-36	0.364858	0.637	0.12	4.13144e-32	4	Impa2
Dnajc9	2.54976e-36	0.744304	0.931	0.332	5.07427e-32	4	Dnajc9
Galk1	3.51384e-36	0.426289	0.637	0.114	6.9929e-32	4	Galk1
Ifrd2	4.31141e-36	0.26075	0.441	0.057	8.58014e-32	4	Ifrd2
Csrp1	4.99426e-36	0.436527	0.784	0.172	9.93907e-32	4	Csrp1
Dnmt1	6.98784e-36	0.434295	0.725	0.145	1.39065e-31	4	Dnmt1
Nap1l1	8.75895e-36	0.77669	0.971	0.44	1.74312e-31	4	Nap1l1
Rfc2	1.51256e-35	0.584216	0.863	0.227	3.01014e-31	4	Rfc2
Txn11	1.55198e-34	0.807633	1	0.768	3.08859e-30	4	Txn1
Pold2	2.75392e-34	0.34932	0.588	0.099	5.48057e-30	4	Pold2
Cdt1	3.36072e-34	0.285416	0.529	0.092	6.68817e-30	4	Cdt1
Alyref	3.68771e-34	0.623169	0.941	0.307	7.3389e-30	4	Alyref
Tnni1	4.56565e-34	0.592217	0.353	0.038	9.08609e-30	4	Tnni1
Gapdh1	4.85829e-34	0.720853	1	0.922	9.66848e-30	4	Gapdh
Pa2g4	5.10025e-34	0.835936	0.941	0.405	1.015e-29	4	Pa2g4
Hn1l	6.98445e-34	0.305528	0.431	0.046	1.38998e-29	4	Hn1l
Slc25a5	1.05333e-33	0.752417	0.99	0.842	2.09623e-29	4	Slc25a5
Hint11	1.14981e-33	0.661352	1	0.801	2.28824e-29	4	Hint1
Nelfe	1.22863e-33	0.359846	0.667	0.136	2.4451e-29	4	Nelfe
Cks2	2.24557e-33	0.28264	0.578	0.095	4.4689e-29	4	Cks2
Cdk4	2.34535e-33	0.691066	0.922	0.311	4.66749e-29	4	Cdk4
Gm9347	2.78853e-33	0.417107	0.618	0.125	5.54946e-29	4	Gm9347
Eif4a11	2.83064e-33	0.70901	1	0.762	5.63325e-29	4	Eif4a1
Ncl	3.12182e-33	0.812605	1	0.781	6.21274e-29	4	Ncl
Nme11	4.43838e-33	0.701325	1	0.725	8.83281e-29	4	Nme1
Usp1	5.59956e-33	0.524555	0.784	0.193	1.11437e-28	4	Usp1
Rnaseh2a	1.45702e-32	0.33358	0.657	0.125	2.89962e-28	4	Rnaseh2a
Sdf2l1	2.16779e-32	0.608926	0.892	0.283	4.31413e-28	4	Sdf2l1
Tssc4	3.2263e-32	0.260486	0.5	0.081	6.42067e-28	4	Tssc4
Fdps	4.77745e-32	0.381681	0.559	0.104	9.5076e-28	4	Fdps
Pkm1	5.10998e-32	0.744118	1	0.672	1.01694e-27	4	Pkm
Atpif1	5.33803e-32	0.630492	0.951	0.342	1.06232e-27	4	Atpif1
Parp1	5.45339e-32	0.34255	0.627	0.123	1.08528e-27	4	Parp1
Pola2	6.72259e-32	0.26488	0.461	0.063	1.33786e-27	4	Pola2
Psma4	7.84902e-32	0.652249	1	0.607	1.56203e-27	4	Psma4
Set	8.37543e-32	0.678397	1	0.79	1.66679e-27	4	Set
Impdh2	9.65942e-32	0.566294	0.931	0.3	1.92232e-27	4	Impdh2
Pmf1	1.08464e-31	0.315743	0.608	0.113	2.15854e-27	4	Pmf1
Npm11	1.12973e-31	0.671206	1	0.952	2.24828e-27	4	Npm1
Tfrc	1.24e-31	0.480183	0.618	0.131	2.46772e-27	4	Tfrc
Slbp	1.24894e-31	0.67026	0.951	0.4	2.48551e-27	4	Slbp
Zmynd19	1.67474e-31	0.268962	0.471	0.071	3.33289e-27	4	Zmynd19
Ddx1	1.68363e-31	0.325588	0.569	0.12	3.35059e-27	4	Ddx1
Tpi11	2.16743e-31	0.779508	0.951	0.436	4.31341e-27	4	Tpi1
Hnrnpab	2.19724e-31	0.689715	0.99	0.544	4.37273e-27	4	Hnrnpab
Nhp2	2.27571e-31	0.614196	0.961	0.35	4.5289e-27	4	Nhp2
Cmc2	2.36814e-31	0.303355	0.716	0.172	4.71284e-27	4	Cmc2
Tubg1	2.98079e-31	0.286812	0.402	0.049	5.93207e-27	4	Tubg1
Shmt2	4.19453e-31	0.411393	0.627	0.141	8.34752e-27	4	Shmt2
Timm50	6.68861e-31	0.380199	0.794	0.189	1.3311e-26	4	Timm50
Igha1	8.58796e-31	0.556694	0.471	0.078	1.70909e-26	4	Igha
Cntln	1.46822e-30	0.267854	0.373	0.044	2.9219e-26	4	Cntln
Eif5a1	7.82218e-30	0.645955	1	0.89	1.55669e-25	4	Eif5a
Ppa1	9.9433e-30	0.575312	0.873	0.286	1.97882e-25	4	Ppa1
Ppat	2.06963e-29	0.321781	0.559	0.109	4.11876e-25	4	Ppat
Ccdc34	2.73612e-29	0.308356	0.48	0.078	5.44516e-25	4	Ccdc34
Cdk61	3.40229e-29	0.670063	0.784	0.237	6.7709e-25	4	Cdk6
Gde1	3.62711e-29	0.255956	0.618	0.129	7.21831e-25	4	Gde1
Erh	5.35385e-29	0.601119	0.912	0.396	1.06547e-24	4	Erh
Rpa3	6.78631e-29	0.413336	0.794	0.222	1.35054e-24	4	Rpa3
Cdca8	7.02076e-29	0.285545	0.284	0.026	1.3972e-24	4	Cdca8
Fkbp2	8.95761e-29	0.416937	0.892	0.257	1.78265e-24	4	Fkbp2
Mms22l	9.35525e-29	0.284537	0.343	0.038	1.86179e-24	4	Mms22l
Ncapd3	1.03123e-28	0.316296	0.627	0.132	2.05225e-24	4	Ncapd3
Mrpl49	1.41467e-28	0.310623	0.696	0.165	2.81533e-24	4	Mrpl49
Nudcd2	1.92146e-28	0.462956	0.784	0.238	3.82389e-24	4	Nudcd2
Pold3	2.05212e-28	0.259633	0.529	0.093	4.08393e-24	4	Pold3
Phb	2.06785e-28	0.558282	0.902	0.3	4.11523e-24	4	Phb
Bri3bp	2.31102e-28	0.279209	0.529	0.096	4.59916e-24	4	Bri3bp
Nsd2	3.39652e-28	0.349928	0.657	0.149	6.75942e-24	4	Nsd2
Alad	4.0684e-28	0.397832	0.667	0.158	8.09652e-24	4	Alad
Psat1	5.53421e-28	0.359076	0.51	0.095	1.10136e-23	4	Psat1
Hpf1	6.18966e-28	0.503647	0.882	0.286	1.2318e-23	4	Hpf1
Srsf7	6.68818e-28	0.629083	0.951	0.424	1.33102e-23	4	Srsf7
Cdca7l	1.0344e-27	0.344796	0.598	0.123	2.05856e-23	4	Cdca7l
Srsf2	1.77672e-27	0.648135	1	0.616	3.53586e-23	4	Srsf2
Smyd3	1.92654e-27	0.299265	0.676	0.163	3.834e-23	4	Smyd3
Vdac1	2.1814e-27	0.577757	0.882	0.321	4.34121e-23	4	Vdac1
Tmem238	2.35425e-27	0.267913	0.461	0.085	4.6852e-23	4	Tmem238
Mpp6	2.73212e-27	0.465159	0.755	0.228	5.4372e-23	4	Mpp6
Dek	3.61756e-27	0.679516	0.971	0.543	7.19931e-23	4	Dek
Casp3	4.25046e-27	0.385336	0.676	0.168	8.45883e-23	4	Casp3
Srm	5.25529e-27	0.383851	0.676	0.167	1.04585e-22	4	Srm
Anp32b	6.43789e-27	0.665957	0.99	0.729	1.28121e-22	4	Anp32b
Lsm2	7.07887e-27	0.444047	0.784	0.24	1.40877e-22	4	Lsm2
Fam111a	1.05671e-26	0.327944	0.725	0.186	2.10295e-22	4	Fam111a
Nsun2	2.2773e-26	0.396864	0.745	0.2	4.53206e-22	4	Nsun2
Idi1	2.80249e-26	0.293395	0.451	0.075	5.57724e-22	4	Idi1
C1qbp	2.98344e-26	0.641849	0.961	0.429	5.93735e-22	4	C1qbp
Dbi1	3.22167e-26	0.600799	0.941	0.382	6.41145e-22	4	Dbi
Cct3	3.68619e-26	0.5442	0.941	0.403	7.33588e-22	4	Cct3
Cyb5b	4.11183e-26	0.335654	0.745	0.203	8.18295e-22	4	Cyb5b
Lsm3	6.71546e-26	0.394615	0.804	0.24	1.33644e-21	4	Lsm3
Rpn1	7.14035e-26	0.366167	0.735	0.207	1.421e-21	4	Rpn1
Gars	8.19453e-26	0.343166	0.755	0.201	1.63079e-21	4	Gars
Srsf3	8.31155e-26	0.597712	1	0.732	1.65408e-21	4	Srsf3
Ssrp1	8.59444e-26	0.618896	0.951	0.446	1.71038e-21	4	Ssrp1
Thyn1	1.81043e-25	0.293598	0.637	0.16	3.60294e-21	4	Thyn1
Kars	1.92344e-25	0.281829	0.657	0.159	3.82783e-21	4	Kars
Cox5a1	2.01916e-25	0.604458	0.98	0.777	4.01833e-21	4	Cox5a
Pgk11	2.07074e-25	0.685046	0.941	0.551	4.12097e-21	4	Pgk1
Odc11	2.2486e-25	0.445932	0.745	0.209	4.47493e-21	4	Odc1
Snrpa1	3.18648e-25	0.517114	0.902	0.326	6.34141e-21	4	Snrpa1
Prdx11	3.58214e-25	0.57305	0.99	0.729	7.12881e-21	4	Prdx1
Topbp1	3.90024e-25	0.375501	0.539	0.124	7.76187e-21	4	Topbp1
Paics	4.47427e-25	0.44511	0.843	0.284	8.90425e-21	4	Paics
Serbp1	4.63007e-25	0.519753	1	0.911	9.2143e-21	4	Serbp1
Eno11	6.4172e-25	0.711114	0.99	0.658	1.27709e-20	4	Eno1
Psmb21	8.40867e-25	0.561473	0.971	0.537	1.67341e-20	4	Psmb2
Rps27l1	8.52898e-25	0.631762	0.931	0.445	1.69735e-20	4	Rps27l
Stoml2	9.02313e-25	0.346915	0.745	0.217	1.79569e-20	4	Stoml2
Tmpo	9.02515e-25	0.504147	0.892	0.334	1.79609e-20	4	Tmpo
Sae1	1.29234e-24	0.429245	0.824	0.255	2.57188e-20	4	Sae1
Got2	1.3478e-24	0.341788	0.598	0.153	2.68225e-20	4	Got2
Nt5c3b	1.35569e-24	0.352458	0.716	0.203	2.69795e-20	4	Nt5c3b
Qdpr	1.85227e-24	0.258198	0.559	0.127	3.68621e-20	4	Qdpr
Pycrl	2.30306e-24	0.254781	0.5	0.102	4.58332e-20	4	Pycrl
Fh1	2.38687e-24	0.306146	0.686	0.181	4.75012e-20	4	Fh1
Tomm40	2.44587e-24	0.398755	0.775	0.229	4.86752e-20	4	Tomm40
Gar1	3.96303e-24	0.430855	0.843	0.258	7.88682e-20	4	Gar1
Nudt5	4.20762e-24	0.352599	0.745	0.218	8.37359e-20	4	Nudt5
Rbm3	5.91145e-24	0.435483	1	0.971	1.17644e-19	4	Rbm3
Sfxn1	6.3075e-24	0.341088	0.775	0.238	1.25525e-19	4	Sfxn1
Atad2	7.68313e-24	0.353895	0.667	0.187	1.52902e-19	4	Atad2
Aimp2	7.99467e-24	0.251204	0.559	0.131	1.59102e-19	4	Aimp2
Timm8a1	8.70279e-24	0.321664	0.569	0.137	1.73194e-19	4	Timm8a1
Nop58	9.41346e-24	0.628683	0.912	0.391	1.87337e-19	4	Nop58
Rbbp7	1.09664e-23	0.57677	0.902	0.366	2.18243e-19	4	Rbbp7
Nedd4	1.11242e-23	0.332193	0.667	0.166	2.21383e-19	4	Nedd4
Cd8a1	1.50353e-23	0.8188	0.716	0.27	2.99217e-19	4	Cd8a
Dkc1	1.54882e-23	0.454964	0.765	0.248	3.0823e-19	4	Dkc1
Tubb5	1.65829e-23	0.85127	0.98	0.737	3.30017e-19	4	Tubb5
Gins4	1.66287e-23	0.262039	0.588	0.14	3.30929e-19	4	Gins4
Banf1	3.00232e-23	0.532758	0.902	0.408	5.97491e-19	4	Banf1
Snrpf	3.43518e-23	0.537813	0.99	0.613	6.83635e-19	4	Snrpf
Snrpe	4.18676e-23	0.477433	1	0.812	8.33206e-19	4	Snrpe
Memo1	4.20238e-23	0.253489	0.539	0.127	8.36316e-19	4	Memo1
Pgam11	5.05357e-23	0.568101	0.971	0.505	1.00571e-18	4	Pgam1
Isyna1	5.87362e-23	0.407553	0.765	0.241	1.16891e-18	4	Isyna1
Rif1	7.39571e-23	0.385386	0.814	0.258	1.47182e-18	4	Rif1
Aen	8.98793e-23	0.274272	0.657	0.169	1.78869e-18	4	Aen
Eif3b	9.0965e-23	0.457024	0.794	0.266	1.81029e-18	4	Eif3b
Rrs1	9.25489e-23	0.298721	0.637	0.165	1.84182e-18	4	Rrs1
H2afz	1.05247e-22	0.592637	1	0.855	2.09451e-18	4	H2afz
Uchl5	1.05888e-22	0.301882	0.735	0.208	2.10728e-18	4	Uchl5
S100a11	1.18632e-22	0.468045	0.667	0.184	2.3609e-18	4	S100a1
Ak2	1.31227e-22	0.447124	0.892	0.316	2.61155e-18	4	Ak2
Ppp1r14b1	1.42891e-22	0.547206	0.951	0.484	2.84368e-18	4	Ppp1r14b
Ndufab1	1.66883e-22	0.507232	0.951	0.401	3.32113e-18	4	Ndufab1
Vim1	1.97866e-22	0.666851	0.99	0.763	3.93773e-18	4	Vim
Nop56	2.14176e-22	0.508237	0.853	0.322	4.26231e-18	4	Nop56
Itgae1	2.33977e-22	0.446121	0.402	0.077	4.65638e-18	4	Itgae
Anapc5	2.3705e-22	0.411316	0.833	0.268	4.71754e-18	4	Anapc5
Erg28	2.75917e-22	0.326393	0.735	0.226	5.49102e-18	4	Erg28
Cops3	2.86975e-22	0.270201	0.667	0.181	5.7111e-18	4	Cops3
Tkt	2.90858e-22	0.562413	0.951	0.482	5.78837e-18	4	Tkt
Mrpl12	2.99569e-22	0.481592	0.902	0.36	5.96172e-18	4	Mrpl12
Psma1	3.71105e-22	0.538029	0.931	0.471	7.38536e-18	4	Psma1
U2af1	4.66239e-22	0.505886	0.951	0.47	9.27862e-18	4	U2af1
Mthfd2	5.70871e-22	0.260786	0.549	0.132	1.13609e-17	4	Mthfd2
Ppp1r7	7.32394e-22	0.273112	0.657	0.182	1.45754e-17	4	Ppp1r7
Psip1	7.74367e-22	0.433126	0.863	0.329	1.54107e-17	4	Psip1
Atp5j	7.77432e-22	0.498396	1	0.736	1.54717e-17	4	Atp5j
Gzmb1	8.07437e-22	0.977993	0.912	0.471	1.60688e-17	4	Gzmb
Idh3a	8.07784e-22	0.387479	0.745	0.253	1.60757e-17	4	Idh3a
Xpo1	8.36922e-22	0.279342	0.618	0.162	1.66556e-17	4	Xpo1
Exosc5	9.67018e-22	0.311884	0.824	0.258	1.92446e-17	4	Exosc5
Prelid3b	1.05064e-21	0.345626	0.676	0.194	2.09089e-17	4	Prelid3b
Nolc1	1.1456e-21	0.400057	0.755	0.241	2.27985e-17	4	Nolc1
Mrps25	1.2655e-21	0.254866	0.686	0.184	2.51847e-17	4	Mrps25
Vdac3	1.40295e-21	0.460629	0.961	0.401	2.79201e-17	4	Vdac3
Cox5b1	1.68878e-21	0.4409	1	0.807	3.36084e-17	4	Cox5b
Hmgb2	1.91506e-21	0.775509	1	0.757	3.81116e-17	4	Hmgb2
Birc5	1.96503e-21	0.352239	0.235	0.03	3.9106e-17	4	Birc5
Eri1	2.04665e-21	0.270901	0.755	0.208	4.07304e-17	4	Eri1
Lyar	2.49601e-21	0.464574	0.824	0.306	4.96731e-17	4	Lyar
Hnrnpa3	2.53647e-21	0.474755	0.98	0.815	5.04783e-17	4	Hnrnpa3
Snrpb	2.80078e-21	0.510205	1	0.678	5.57384e-17	4	Snrpb
Cbx3	2.90037e-21	0.484783	0.99	0.576	5.77203e-17	4	Cbx3
Atp5g1	3.15927e-21	0.502761	0.99	0.627	6.28726e-17	4	Atp5g1
Ruvbl2	3.42837e-21	0.277547	0.559	0.132	6.82281e-17	4	Ruvbl2
Mrps28	3.47752e-21	0.315175	0.647	0.185	6.92061e-17	4	Mrps28
Atp5b1	5.37079e-21	0.476069	1	0.841	1.06884e-16	4	Atp5b
Mrto4	6.95797e-21	0.408052	0.765	0.252	1.38471e-16	4	Mrto4
Ubl4a	7.59508e-21	0.260173	0.706	0.208	1.5115e-16	4	Ubl4a
Casp8ap2	7.73693e-21	0.274967	0.637	0.172	1.53973e-16	4	Casp8ap2
Rfc1	7.83284e-21	0.314239	0.657	0.182	1.55881e-16	4	Rfc1
Gm10039	8.0453e-21	0.342575	0.755	0.225	1.60109e-16	4	Gm10039
Emid11	8.77414e-21	0.259715	0.676	0.206	1.74614e-16	4	Emid1
Rpa1	9.02752e-21	0.341667	0.627	0.185	1.79657e-16	4	Rpa1
Pno1	9.09377e-21	0.267513	0.559	0.145	1.80975e-16	4	Pno1
Prpf19	9.57959e-21	0.270573	0.784	0.242	1.90643e-16	4	Prpf19
Lage3	1.01228e-20	0.264992	0.745	0.231	2.01455e-16	4	Lage3
Eef1e1	1.01942e-20	0.322374	0.755	0.233	2.02876e-16	4	Eef1e1
Rbbp4	1.13606e-20	0.520847	0.961	0.475	2.26087e-16	4	Rbbp4
Rpl41	1.30291e-20	0.268863	1	1	2.59292e-16	4	Rpl41
Hist1h2ap	1.33886e-20	0.3432	0.265	0.041	2.66446e-16	4	Hist1h2ap
Smc1a	1.46851e-20	0.498617	0.863	0.356	2.92247e-16	4	Smc1a
Trim28	1.50012e-20	0.287936	0.667	0.192	2.98538e-16	4	Trim28
Tsfm	1.53658e-20	0.250924	0.637	0.179	3.05796e-16	4	Tsfm
Hmgn1	1.56139e-20	0.586488	0.814	0.327	3.10733e-16	4	Hmgn1
Prpf31	1.59428e-20	0.252845	0.627	0.17	3.17278e-16	4	Prpf31
Fam162a	1.71452e-20	0.425063	0.814	0.271	3.41207e-16	4	Fam162a
Kpnb1	2.47104e-20	0.354333	0.775	0.255	4.91761e-16	4	Kpnb1
Rexo2	4.05271e-20	0.53274	0.971	0.496	8.0653e-16	4	Rexo2
Naa50	4.36468e-20	0.411088	0.794	0.279	8.68615e-16	4	Naa50
Anapc15	4.49244e-20	0.281812	0.51	0.113	8.94041e-16	4	Anapc15
Pgp	5.03755e-20	0.309644	0.696	0.21	1.00252e-15	4	Pgp
Polr2f	5.57017e-20	0.416376	0.941	0.416	1.10852e-15	4	Polr2f
Phb21	8.88488e-20	0.51708	0.98	0.53	1.76818e-15	4	Phb2
Nudt19	1.19535e-19	0.284376	0.647	0.175	2.37886e-15	4	Nudt19
Prmt1	1.47858e-19	0.498307	0.931	0.433	2.94253e-15	4	Prmt1
Eif2s1	1.82099e-19	0.468074	0.912	0.461	3.62395e-15	4	Eif2s1
Ebna1bp2	1.93144e-19	0.348873	0.892	0.334	3.84377e-15	4	Ebna1bp2
Hprt	1.97131e-19	0.473444	0.98	0.481	3.9231e-15	4	Hprt
Rcc2	2.4333e-19	0.339246	0.784	0.262	4.84251e-15	4	Rcc2
Fbl	4.06018e-19	0.513123	0.961	0.489	8.08016e-15	4	Fbl
Fkbp4	4.36043e-19	0.313612	0.892	0.318	8.6777e-15	4	Fkbp4
Hnrnpf	4.46168e-19	0.425639	0.99	0.87	8.8792e-15	4	Hnrnpf
Nxt1	5.85403e-19	0.262862	0.647	0.175	1.16501e-14	4	Nxt1
Lman1	5.91725e-19	0.268369	0.618	0.181	1.17759e-14	4	Lman1
Dynll2	6.46307e-19	0.295602	0.765	0.245	1.28622e-14	4	Dynll2
Gmps	6.65678e-19	0.271596	0.706	0.231	1.32477e-14	4	Gmps
Chchd10	7.12685e-19	0.266966	0.578	0.17	1.41831e-14	4	Chchd10
Ndufc2	9.01804e-19	0.431991	0.941	0.466	1.79468e-14	4	Ndufc2
Dpy30	9.77588e-19	0.415362	0.902	0.358	1.9455e-14	4	Dpy30
Tceal9	1.19453e-18	0.303507	0.706	0.235	2.37724e-14	4	Tceal9
Snu13	1.23322e-18	0.517561	0.961	0.527	2.45422e-14	4	Snu13
Mrpl17	1.28332e-18	0.311222	0.745	0.236	2.55393e-14	4	Mrpl17
Eif3a	1.33284e-18	0.457684	1	0.595	2.65249e-14	4	Eif3a
Atp5g3	1.58109e-18	0.486761	0.98	0.659	3.14653e-14	4	Atp5g3
Hnrnpu	1.68966e-18	0.474791	0.99	0.682	3.3626e-14	4	Hnrnpu
Cct5	1.71392e-18	0.489363	0.98	0.573	3.41087e-14	4	Cct5
Atp5o	1.72767e-18	0.433581	0.98	0.689	3.43823e-14	4	Atp5o
Mrpl34	2.00338e-18	0.373948	0.794	0.29	3.98693e-14	4	Mrpl34
Tnfrsf91	2.14536e-18	0.515051	0.755	0.272	4.26948e-14	4	Tnfrsf9
Atp5f11	2.29602e-18	0.465022	1	0.772	4.5693e-14	4	Atp5f1
Uqcr10	2.96371e-18	0.429812	0.98	0.721	5.89808e-14	4	Uqcr10
Uba2	2.9773e-18	0.329391	0.794	0.284	5.92512e-14	4	Uba2
Polr2h	3.04092e-18	0.265385	0.706	0.225	6.05174e-14	4	Polr2h
Uchl3	3.11149e-18	0.261883	0.775	0.26	6.19218e-14	4	Uchl3
Ddx39	3.73997e-18	0.43908	0.863	0.361	7.44292e-14	4	Ddx39
Cdc123	4.15776e-18	0.250886	0.676	0.209	8.27437e-14	4	Cdc123
Elof1	4.18952e-18	0.260596	0.765	0.259	8.33757e-14	4	Elof1
Bcl7c	4.59907e-18	0.343097	0.853	0.323	9.15261e-14	4	Bcl7c
Gspt1	4.65805e-18	0.375491	0.794	0.304	9.26998e-14	4	Gspt1
Ndufa4	4.97296e-18	0.418519	1	0.864	9.89668e-14	4	Ndufa4
Rbmxl1	6.68886e-18	0.326612	0.735	0.243	1.33115e-13	4	Rbmxl1
Atp5k	7.47358e-18	0.428202	0.99	0.635	1.48732e-13	4	Atp5k
Hspa9	7.71228e-18	0.331417	0.784	0.305	1.53482e-13	4	Hspa9
U2af2	8.67844e-18	0.320807	0.843	0.311	1.7271e-13	4	U2af2
Dtnbp11	9.13629e-18	0.360299	0.824	0.314	1.81821e-13	4	Dtnbp1
Blmh	9.8913e-18	0.254714	0.637	0.197	1.96847e-13	4	Blmh
Cct6a	1.12066e-17	0.486474	0.902	0.454	2.23022e-13	4	Cct6a
Hdgf	1.13035e-17	0.395189	0.941	0.416	2.2495e-13	4	Hdgf
Lsm8	1.24254e-17	0.295149	0.814	0.314	2.47277e-13	4	Lsm8
Sf3a3	1.89624e-17	0.254689	0.618	0.196	3.77371e-13	4	Sf3a3
Magohb	2.11991e-17	0.263344	0.588	0.168	4.21884e-13	4	Magohb
Cox7a2	2.24462e-17	0.440096	0.99	0.829	4.46701e-13	4	Cox7a2
Rps2	2.45159e-17	0.349424	1	0.992	4.87892e-13	4	Rps2
Selenoh	2.5077e-17	0.425986	0.912	0.407	4.99057e-13	4	Selenoh
Psma71	2.59289e-17	0.441117	0.99	0.773	5.1601e-13	4	Psma7
Cycs	2.6637e-17	0.478951	0.961	0.665	5.30103e-13	4	Cycs
Cct8	2.70338e-17	0.475501	0.971	0.589	5.38e-13	4	Cct8
Ywhah	2.7669e-17	0.456974	0.971	0.47	5.5064e-13	4	Ywhah
Ssb	2.88658e-17	0.447787	0.98	0.649	5.74458e-13	4	Ssb
Eprs	3.96429e-17	0.295634	0.735	0.252	7.88933e-13	4	Eprs
Rrp15	4.32028e-17	0.27025	0.608	0.191	8.5978e-13	4	Rrp15
Hdac2	4.47571e-17	0.299664	0.618	0.19	8.90711e-13	4	Hdac2
Exosc7	5.55854e-17	0.291711	0.716	0.238	1.1062e-12	4	Exosc7
Oxct1	5.85801e-17	0.281798	0.794	0.288	1.1658e-12	4	Oxct1
Atxn10	8.02018e-17	0.265437	0.745	0.242	1.5961e-12	4	Atxn10
Nans	8.15458e-17	0.323562	0.775	0.283	1.62284e-12	4	Nans
Snrpa	9.10108e-17	0.253659	0.696	0.232	1.81121e-12	4	Snrpa
Cenpx	9.26604e-17	0.424058	0.922	0.435	1.84403e-12	4	Cenpx
Gtf3a	9.82631e-17	0.264932	0.627	0.199	1.95553e-12	4	Gtf3a
Actb	1.04007e-16	0.324434	1	0.999	2.06983e-12	4	Actb
Commd1	1.18492e-16	0.285469	0.745	0.246	2.35812e-12	4	Commd1
Hnrnpd	1.3001e-16	0.437378	0.98	0.648	2.58733e-12	4	Hnrnpd
Rps17	1.3098e-16	0.331883	1	0.959	2.60664e-12	4	Rps17
Psma2	1.50897e-16	0.409899	1	0.754	3.003e-12	4	Psma2
Lgals31	1.52491e-16	0.648825	0.892	0.46	3.03473e-12	4	Lgals3
Ndufv1	1.96852e-16	0.331146	0.784	0.314	3.91754e-12	4	Ndufv1
Mrpl13	2.13094e-16	0.321727	0.824	0.307	4.24079e-12	4	Mrpl13
Gnl3	2.20342e-16	0.26301	0.608	0.189	4.38504e-12	4	Gnl3
Hnrnpa2b1	2.92756e-16	0.367451	1	0.842	5.82614e-12	4	Hnrnpa2b1
Hnrnpa1	2.95304e-16	0.453281	0.99	0.598	5.87684e-12	4	Hnrnpa1
Acp1	3.02968e-16	0.262234	0.735	0.255	6.02937e-12	4	Acp1
Ptpn61	3.06642e-16	0.364605	0.765	0.278	6.10247e-12	4	Ptpn6
Mrpl18	4.50919e-16	0.380713	0.931	0.447	8.97374e-12	4	Mrpl18
Cyc1	4.77864e-16	0.30144	0.902	0.373	9.50997e-12	4	Cyc1
Hspa14	5.08004e-16	0.317741	0.706	0.238	1.01098e-11	4	Hspa14
Ndufc1	5.13088e-16	0.381592	0.941	0.453	1.0211e-11	4	Ndufc1
Exosc8	5.24594e-16	0.317742	0.784	0.286	1.04399e-11	4	Exosc8
Hdlbp	6.10627e-16	0.292294	0.667	0.21	1.21521e-11	4	Hdlbp
Rangap1	6.29619e-16	0.298418	0.647	0.214	1.253e-11	4	Rangap1
Immt	6.4808e-16	0.266401	0.716	0.238	1.28974e-11	4	Immt
Lsm7	7.69493e-16	0.316293	0.833	0.342	1.53137e-11	4	Lsm7
Mydgf	7.8114e-16	0.263924	0.735	0.265	1.55455e-11	4	Mydgf
Chchd1	1.04243e-15	0.372094	0.892	0.373	2.07455e-11	4	Chchd1
Bzw2	1.12986e-15	0.28013	0.814	0.313	2.24853e-11	4	Bzw2
Snrpd2	1.34399e-15	0.401117	0.971	0.651	2.67467e-11	4	Snrpd2
Etfb	1.42404e-15	0.389565	0.892	0.387	2.83398e-11	4	Etfb
Npm3	1.43187e-15	0.39292	0.931	0.48	2.84957e-11	4	Npm3
Smc3	1.64922e-15	0.325609	0.843	0.332	3.28212e-11	4	Smc3
Txnl1	1.89668e-15	0.376152	0.922	0.439	3.77458e-11	4	Txnl1
Mtch2	2.21846e-15	0.262055	0.716	0.248	4.41495e-11	4	Mtch2
Eif4a3	2.43765e-15	0.322876	0.873	0.354	4.85117e-11	4	Eif4a3
Stip1	2.62815e-15	0.271151	0.686	0.238	5.23029e-11	4	Stip1
Pdap1	2.93981e-15	0.333268	0.961	0.439	5.85052e-11	4	Pdap1
Syncrip	3.20076e-15	0.301022	0.863	0.363	6.36983e-11	4	Syncrip
Mrpl20	3.83823e-15	0.34849	0.892	0.352	7.63845e-11	4	Mrpl20
Mrpl42	4.03454e-15	0.372522	0.873	0.37	8.02914e-11	4	Mrpl42
Eif1ax1	4.11527e-15	0.403036	0.892	0.413	8.18979e-11	4	Eif1ax
Nrgn	4.20742e-15	0.293214	0.353	0.085	8.37318e-11	4	Nrgn
Psma51	4.21377e-15	0.403896	0.951	0.459	8.38582e-11	4	Psma5
Hmgb1	4.45862e-15	0.447864	1	0.8	8.87309e-11	4	Hmgb1
Ptges3	4.58742e-15	0.396882	0.951	0.478	9.12941e-11	4	Ptges3
Npepl1	4.63031e-15	0.255194	0.696	0.232	9.21478e-11	4	Npepl1
Snrnp40	4.67304e-15	0.256158	0.814	0.304	9.29981e-11	4	Snrnp40
Nop10	5.0612e-15	0.421176	0.99	0.672	1.00723e-10	4	Nop10
Supt16	5.80926e-15	0.333391	0.794	0.321	1.1561e-10	4	Supt16
Atp5j2	5.97335e-15	0.347059	1	0.862	1.18876e-10	4	Atp5j2
H3f3a	6.56262e-15	0.297356	1	0.976	1.30603e-10	4	H3f3a
Dnajc2	6.88188e-15	0.362344	0.882	0.396	1.36956e-10	4	Dnajc2
Polr2l	7.10794e-15	0.372457	0.922	0.456	1.41455e-10	4	Polr2l
Pole4	7.66898e-15	0.351567	0.922	0.415	1.5262e-10	4	Pole4
Slc25a4	8.88804e-15	0.433863	0.961	0.499	1.76881e-10	4	Slc25a4
Nars	8.89737e-15	0.299372	0.784	0.305	1.77067e-10	4	Nars
Uqcrq	9.43354e-15	0.409018	0.99	0.683	1.87737e-10	4	Uqcrq
Mrpl51	1.02407e-14	0.278339	0.833	0.311	2.03799e-10	4	Mrpl51
Phf5a	1.14389e-14	0.307768	0.814	0.345	2.27645e-10	4	Phf5a
Capg1	1.29599e-14	0.624939	0.755	0.387	2.57915e-10	4	Capg
Grpel1	1.44494e-14	0.300395	0.804	0.322	2.87557e-10	4	Grpel1
Sumo3	1.50096e-14	0.275705	0.755	0.293	2.98706e-10	4	Sumo3
Rsl1d1	1.51439e-14	0.387319	0.902	0.464	3.01379e-10	4	Rsl1d1
Naa10	1.55224e-14	0.327033	0.794	0.318	3.08912e-10	4	Naa10
Lsm6	1.59634e-14	0.354532	0.892	0.409	3.17688e-10	4	Lsm6
Sdhb	1.63107e-14	0.324285	0.902	0.404	3.24599e-10	4	Sdhb
Mid1ip1	2.09651e-14	0.266978	0.382	0.101	4.17227e-10	4	Mid1ip1
Pfdn6	2.2027e-14	0.302746	0.833	0.336	4.3836e-10	4	Pfdn6
Eloc	2.35779e-14	0.384479	0.941	0.474	4.69225e-10	4	Eloc
Mrps15	2.37063e-14	0.265398	0.843	0.342	4.71779e-10	4	Mrps15
Timm13	2.42818e-14	0.359467	0.951	0.497	4.83231e-10	4	Timm13
Anapc11	2.88615e-14	0.304262	0.765	0.311	5.74374e-10	4	Anapc11
G3bp1	3.12271e-14	0.384675	0.931	0.484	6.21451e-10	4	G3bp1
Hspd11	3.26961e-14	0.352478	0.971	0.584	6.50685e-10	4	Hspd1
Klrb1a	4.26739e-14	0.290126	0.333	0.089	8.49253e-10	4	Klrb1a
Cox7c	4.49662e-14	0.329638	0.99	0.877	8.94872e-10	4	Cox7c
Bola2	4.6853e-14	0.374475	0.971	0.575	9.32422e-10	4	Bola2
Timm17a	5.33459e-14	0.25107	0.814	0.304	1.06164e-09	4	Timm17a
Magoh	8.39415e-14	0.400903	0.951	0.539	1.67052e-09	4	Magoh
Snx5	1.17573e-13	0.303914	0.882	0.355	2.33982e-09	4	Snx5
Hsp90ab11	1.2117e-13	0.286874	1	0.972	2.4114e-09	4	Hsp90ab1
Ddb1	1.29716e-13	0.276048	0.559	0.177	2.58148e-09	4	Ddb1
Pdia61	1.39063e-13	0.422591	0.951	0.506	2.76748e-09	4	Pdia6
Psmc4	1.49097e-13	0.274817	0.843	0.334	2.96717e-09	4	Psmc4
Polr2j	1.51238e-13	0.260787	0.882	0.368	3.00979e-09	4	Polr2j
Slc25a3	1.57844e-13	0.325273	0.99	0.827	3.14125e-09	4	Slc25a3
Tcp1	1.65809e-13	0.344887	0.931	0.446	3.29976e-09	4	Tcp1
Minos1	1.76163e-13	0.369398	0.99	0.717	3.50582e-09	4	Minos1
Lgals3bp	1.79662e-13	0.269577	0.755	0.312	3.57546e-09	4	Lgals3bp
S100a41	1.90731e-13	0.635967	0.863	0.554	3.79574e-09	4	S100a4
Nudc	1.95363e-13	0.36217	0.882	0.439	3.88791e-09	4	Nudc
Mbd3	1.95816e-13	0.264358	0.745	0.288	3.89694e-09	4	Mbd3
Ly6e1	2.25398e-13	0.35046	0.971	0.524	4.48565e-09	4	Ly6e
Sf3b5	2.40471e-13	0.34118	0.98	0.539	4.78562e-09	4	Sf3b5
Uqcr11	2.48845e-13	0.389068	0.99	0.573	4.95226e-09	4	Uqcr11
Acot7	2.50102e-13	0.255507	0.843	0.328	4.97728e-09	4	Acot7
Fam96a	2.54302e-13	0.338649	0.882	0.423	5.06087e-09	4	Fam96a
Uqcrb	2.56916e-13	0.35608	0.98	0.661	5.11288e-09	4	Uqcrb
Tmem14c	2.72967e-13	0.36781	0.931	0.49	5.43232e-09	4	Tmem14c
Ndufb2	2.78622e-13	0.333843	0.863	0.391	5.54485e-09	4	Ndufb2
1810037I17Rik	3.13621e-13	0.421574	0.951	0.617	6.24137e-09	4	1810037I17Rik
Erp29	3.21873e-13	0.315615	0.882	0.37	6.4056e-09	4	Erp29
Raly	3.27493e-13	0.377673	0.971	0.576	6.51745e-09	4	Raly
AI662270	3.30454e-13	0.316485	0.912	0.443	6.57636e-09	4	AI662270
Actg11	4.43282e-13	0.304512	1	0.991	8.82176e-09	4	Actg1
Ywhae1	4.43372e-13	0.364889	0.931	0.49	8.82354e-09	4	Ywhae
Pdia3	4.43423e-13	0.389477	0.99	0.709	8.82455e-09	4	Pdia3
Atp5e	4.80357e-13	0.258067	1	0.975	9.55958e-09	4	Atp5e
Srsf10	5.18812e-13	0.278829	0.755	0.295	1.03249e-08	4	Srsf10
1110038B12Rik	6.79181e-13	0.305483	0.755	0.311	1.35164e-08	4	1110038B12Rik
Ddx18	6.88391e-13	0.255851	0.725	0.294	1.36997e-08	4	Ddx18
Mrpl15	7.91319e-13	0.280065	0.716	0.3	1.5748e-08	4	Mrpl15
Psmd7	7.97528e-13	0.311878	0.843	0.377	1.58716e-08	4	Psmd7
Tubb4b	8.46481e-13	0.296625	0.667	0.261	1.68458e-08	4	Tubb4b
Cotl11	8.56411e-13	0.345895	1	0.911	1.70434e-08	4	Cotl1
Tomm5	8.81871e-13	0.390811	0.951	0.512	1.75501e-08	4	Tomm5
Isg201	1.01695e-12	0.337201	0.657	0.262	2.02384e-08	4	Isg20
Srsf6	1.35469e-12	0.294061	0.863	0.387	2.69598e-08	4	Srsf6
Eny2	1.42598e-12	0.269938	0.941	0.443	2.83783e-08	4	Eny2
Eif3l	1.43299e-12	0.299489	0.775	0.335	2.85179e-08	4	Eif3l
Cox6c	1.50804e-12	0.303515	1	0.87	3.00115e-08	4	Cox6c
Reep51	1.52972e-12	0.407732	0.951	0.637	3.04429e-08	4	Reep5
Mrpl33	1.571e-12	0.358906	0.99	0.638	3.12644e-08	4	Mrpl33
Cdv3	1.62877e-12	0.25123	0.843	0.345	3.24142e-08	4	Cdv3
Mdh2	1.70907e-12	0.356982	0.961	0.585	3.40123e-08	4	Mdh2
Ndufb9	2.07612e-12	0.308764	0.951	0.545	4.13168e-08	4	Ndufb9
Ada	2.20489e-12	0.269953	0.657	0.252	4.38794e-08	4	Ada
Uqcrc1	2.45426e-12	0.271774	0.824	0.35	4.88421e-08	4	Uqcrc1
Txn2	2.54977e-12	0.321327	0.931	0.447	5.07429e-08	4	Txn2
Dazap1	2.69005e-12	0.260441	0.863	0.375	5.35348e-08	4	Dazap1
Ube2l3	3.11917e-12	0.365923	0.961	0.591	6.20745e-08	4	Ube2l3
Cox7b	3.21431e-12	0.32897	1	0.805	6.39679e-08	4	Cox7b
Ybx31	3.31014e-12	0.328124	0.814	0.388	6.58751e-08	4	Ybx3
Metap2	3.66233e-12	0.259952	0.814	0.355	7.28839e-08	4	Metap2
Atp5a1	3.79281e-12	0.369507	0.99	0.721	7.54808e-08	4	Atp5a1
Ndufb8	4.40601e-12	0.357393	0.931	0.516	8.7684e-08	4	Ndufb8
Ola1	5.14419e-12	0.276257	0.853	0.387	1.02374e-07	4	Ola1
Psma6	5.19681e-12	0.318877	0.931	0.489	1.03422e-07	4	Psma6
Eif1a	5.21948e-12	0.254565	0.755	0.307	1.03873e-07	4	Eif1a
Eid1	5.25483e-12	0.257076	0.725	0.286	1.04576e-07	4	Eid1
Sdhd	5.6954e-12	0.301326	0.853	0.396	1.13344e-07	4	Sdhd
Vdac2	7.11965e-12	0.360827	0.98	0.648	1.41688e-07	4	Vdac2
Manf	7.71424e-12	0.332984	0.98	0.57	1.53521e-07	4	Manf
Ndufa5	8.12409e-12	0.318861	0.863	0.456	1.61677e-07	4	Ndufa5
Sfpq	1.0146e-11	0.304825	0.863	0.458	2.01915e-07	4	Sfpq
Cetn3	1.11685e-11	0.269627	0.902	0.407	2.22265e-07	4	Cetn3
Ppm1g	1.12784e-11	0.252583	0.804	0.366	2.24452e-07	4	Ppm1g
Canx	1.19537e-11	0.295878	0.941	0.488	2.37891e-07	4	Canx
Pcbp1	1.51588e-11	0.357461	0.961	0.571	3.01676e-07	4	Pcbp1
Syngr2	1.67144e-11	0.25133	0.745	0.3	3.32634e-07	4	Syngr2
Sumo2	1.72649e-11	0.265896	1	0.884	3.43588e-07	4	Sumo2
Atp5d1	1.75554e-11	0.316026	1	0.818	3.4937e-07	4	Atp5d
Ndufb6	1.77041e-11	0.265242	0.853	0.41	3.52329e-07	4	Ndufb6
Rnaseh2c	1.98981e-11	0.269637	0.794	0.367	3.95992e-07	4	Rnaseh2c
Nucks1	2.06296e-11	0.273506	0.98	0.559	4.1055e-07	4	Nucks1
Hsp90b1	2.10813e-11	0.39545	0.98	0.681	4.19539e-07	4	Hsp90b1
Cd71	2.25642e-11	0.497389	0.98	0.718	4.49051e-07	4	Cd7
Mrpl54	2.34958e-11	0.259289	0.804	0.359	4.6759e-07	4	Mrpl54
Ssr2	2.89942e-11	0.270516	0.863	0.386	5.77015e-07	4	Ssr2
Hnrnpk	3.02833e-11	0.313484	0.99	0.759	6.02668e-07	4	Hnrnpk
Jaml1	3.05422e-11	0.406696	0.912	0.491	6.07821e-07	4	Jaml
Psmc3	3.25844e-11	0.264121	0.902	0.403	6.48463e-07	4	Psmc3
Ube2m	3.83018e-11	0.267026	0.863	0.392	7.62243e-07	4	Ube2m
Ube2n	4.53952e-11	0.321242	0.98	0.536	9.03411e-07	4	Ube2n
Snrpd3	5.3196e-11	0.352273	0.922	0.522	1.05865e-06	4	Snrpd3
Pdcd5	7.49443e-11	0.260167	0.902	0.444	1.49147e-06	4	Pdcd5
Crip11	7.62159e-11	0.463851	0.98	0.786	1.51677e-06	4	Crip1
Psme2	8.21955e-11	0.307628	0.99	0.813	1.63577e-06	4	Psme2
Psmd13	9.49679e-11	0.254978	0.902	0.411	1.88996e-06	4	Psmd13
Acadl	9.97019e-11	0.295256	0.824	0.392	1.98417e-06	4	Acadl
Ndufa8	9.98003e-11	0.280048	0.892	0.437	1.98613e-06	4	Ndufa8
Bzw1	1.20458e-10	0.28585	0.912	0.498	2.39724e-06	4	Bzw1
Eif4h	1.22776e-10	0.262586	0.882	0.418	2.44336e-06	4	Eif4h
Glrx3	1.33215e-10	0.263238	0.892	0.451	2.65112e-06	4	Glrx3
Cox6b1	1.34272e-10	0.270563	0.99	0.83	2.67215e-06	4	Cox6b1
Denr	1.49239e-10	0.262284	0.873	0.421	2.97e-06	4	Denr
Pebp1	1.60722e-10	0.318799	0.971	0.627	3.19853e-06	4	Pebp1
Romo1	1.68216e-10	0.263507	0.873	0.419	3.34768e-06	4	Romo1
Psmb5	1.75283e-10	0.308517	0.902	0.491	3.48831e-06	4	Psmb5
Pomp	2.03052e-10	0.297183	0.99	0.726	4.04094e-06	4	Pomp
Fcer1g1	2.43385e-10	0.440901	0.971	0.699	4.84361e-06	4	Fcer1g
Tmem256	2.58495e-10	0.259101	0.882	0.425	5.14432e-06	4	Tmem256
Tcrg-C21	2.67509e-10	0.383728	0.735	0.401	5.32369e-06	4	Tcrg-C2
Cd160	2.77674e-10	0.314931	0.951	0.567	5.526e-06	4	Cd160
Ndufa11	2.85902e-10	0.289093	0.961	0.515	5.68973e-06	4	Ndufa11
Serpina3g	4.00805e-10	0.273081	0.294	0.09	7.97642e-06	4	Serpina3g
Trp53	4.1241e-10	0.260511	0.843	0.423	8.20736e-06	4	Trp53
Dcun1d5	6.77651e-10	0.278704	0.873	0.4	1.34859e-05	4	Dcun1d5
Nono	7.29872e-10	0.292309	0.863	0.478	1.45252e-05	4	Nono
Strap	8.41397e-10	0.277146	0.833	0.395	1.67446e-05	4	Strap
Fkbp3	8.52853e-10	0.301202	0.971	0.663	1.69726e-05	4	Fkbp3
Arpp19	1.21678e-09	0.263259	0.99	0.641	2.42152e-05	4	Arpp19
Ddost	1.23726e-09	0.253473	0.853	0.44	2.46227e-05	4	Ddost
Plac81	1.34674e-09	0.339848	0.765	0.415	2.68014e-05	4	Plac8
Ddx39b	2.08403e-09	0.253642	0.971	0.564	4.14743e-05	4	Ddx39b
Eif3i	3.32499e-09	0.28468	0.99	0.667	6.61707e-05	4	Eif3i
Swi5	4.60696e-09	0.255891	0.931	0.566	9.1683e-05	4	Swi5
Fkbp1a	5.23456e-09	0.271109	0.931	0.49	0.000104173	4	Fkbp1a
Erdr1	5.36825e-09	0.252266	0.98	0.613	0.000106834	4	Erdr1
Cct2	6.10032e-09	0.295607	0.971	0.645	0.000121403	4	Cct2
Rbx1	7.85909e-09	0.265883	0.99	0.748	0.000156404	4	Rbx1
Cct7	8.24232e-09	0.272181	0.951	0.588	0.00016403	4	Cct7
Mdh1	1.01597e-08	0.274576	0.961	0.65	0.000202188	4	Mdh1
Vcp	1.2657e-08	0.265412	0.843	0.443	0.000251887	4	Vcp
Lcp11	1.70835e-08	0.268578	1	0.811	0.000339979	4	Lcp1
Eif2s2	1.81543e-08	0.281158	0.951	0.615	0.000361289	4	Eif2s2
Cox6a1	2.15413e-08	0.261627	0.931	0.627	0.000428693	4	Cox6a1
Tomm20	2.22453e-08	0.263163	0.971	0.636	0.000442704	4	Tomm20
Ube2s1	2.34679e-08	0.269889	0.922	0.519	0.000467036	4	Ube2s
Psma3	3.11186e-08	0.269081	0.971	0.677	0.000619291	4	Psma3
Rwdd1	3.68757e-08	0.256086	0.892	0.501	0.000733864	4	Rwdd1
Ndufb7	6.5506e-08	0.251581	0.971	0.668	0.00130363	4	Ndufb7
Ly6a	7.61026e-08	0.370689	0.657	0.354	0.00151452	4	Ly6a
Capzb	8.26339e-08	0.253815	1	0.739	0.0016445	4	Capzb
Klra51	1.08709e-07	0.532036	0.647	0.396	0.00216343	4	Klra5
Igfbp4	1.58894e-07	0.299524	0.137	0.033	0.00316216	4	Igfbp4
Ssr41	5.81096e-07	0.256603	0.951	0.67	0.0115644	4	Ssr4
Gadd45g1	3.0055e-06	0.520888	0.451	0.207	0.0598124	4	Gadd45g
Aldoa1	9.63649e-06	0.272247	0.961	0.803	0.191776	4	Aldoa
Spp11	0.00088023	0.48492	0.569	0.339	1	4	Spp1

## Sheet: Cluster_markers_CD4_T_cells
	p_val	avg_logFC	pct.1	pct.2	p_val_adj	cluster	gene
Rps27	1.88914e-99	0.352733	0.999	1	3.75958e-95	0	Rps27
Malat1	6.1592e-69	0.379191	1	1	1.22574e-64	0	Malat1
Rplp1	4.05552e-51	0.252397	0.999	0.999	8.07088e-47	0	Rplp1
Itga4	6.02399e-48	0.818832	0.504	0.228	1.19883e-43	0	Itga4
Rps3a1	1.97929e-45	0.250969	0.998	0.999	3.93898e-41	0	Rps3a1
mt-Cytb	3.59867e-45	0.384889	0.973	0.981	7.16171e-41	0	mt-Cytb
Rpl12	1.53175e-41	0.265582	0.989	0.996	3.04833e-37	0	Rpl12
Slamf6	2.11491e-37	0.719002	0.518	0.283	4.20888e-33	0	Slamf6
mt-Nd4	2.00079e-34	0.365546	0.945	0.946	3.98178e-30	0	mt-Nd4
mt-Nd2	1.18925e-30	0.349049	0.947	0.948	2.36672e-26	0	mt-Nd2
S1pr1	5.53768e-29	0.585777	0.52	0.309	1.10205e-24	0	S1pr1
Tcf7	2.69735e-28	0.60008	0.552	0.362	5.36799e-24	0	Tcf7
mt-Nd1	1.53357e-23	0.319314	0.928	0.961	3.05195e-19	0	mt-Nd1
Socs3	1.29671e-20	0.5384	0.411	0.257	2.58058e-16	0	Socs3
Rflnb	3.47649e-20	0.512771	0.206	0.066	6.91856e-16	0	Rflnb
Gm8696	2.84443e-19	0.615497	0.181	0.069	5.66069e-15	0	Gm8696
Rps27rt	2.14917e-18	0.306004	0.844	0.844	4.27706e-14	0	Rps27rt
Izumo1r	7.94583e-17	0.563735	0.308	0.151	1.5813e-12	0	Izumo1r
Gm26825	2.38121e-15	0.450253	0.674	0.57	4.73884e-11	0	Gm26825
Il7r	2.92032e-14	0.367567	0.707	0.644	5.81172e-10	0	Il7r
Sell	7.36372e-13	0.394988	0.127	0.042	1.46545e-08	0	Sell
Il6ra	1.76424e-12	0.307399	0.183	0.086	3.51101e-08	0	Il6ra
Foxp1	4.95364e-12	0.433525	0.383	0.267	9.85824e-08	0	Foxp1
Gm11346	1.9268e-11	0.3879	0.16	0.06	3.83453e-07	0	Gm11346
Adk	2.38685e-11	0.398709	0.33	0.228	4.75008e-07	0	Adk
Fyb	3.06054e-11	0.267068	0.81	0.82	6.09079e-07	0	Fyb
Ripor2	8.66062e-11	0.435161	0.314	0.194	1.72355e-06	0	Ripor2
Ets1	1.67133e-10	0.320521	0.789	0.805	3.32611e-06	0	Ets1
mt-Nd5	1.25595e-09	0.298958	0.676	0.7	2.49946e-05	0	mt-Nd5
Cd8b1	1.84305e-09	0.512729	0.191	0.113	3.66786e-05	0	Cd8b1
Cd27	1.85875e-09	0.363709	0.243	0.159	3.69909e-05	0	Cd27
Gimap6	2.4929e-09	0.305871	0.665	0.614	4.96111e-05	0	Gimap6
Itgb1	2.51212e-09	0.419741	0.623	0.597	4.99937e-05	0	Itgb1
Cmah	5.0354e-09	0.33183	0.195	0.11	0.00010021	0	Cmah
Arhgap45	5.48815e-09	0.305471	0.621	0.627	0.00010922	0	Arhgap45
Atp1b3	1.01289e-08	0.418837	0.496	0.463	0.000201575	0	Atp1b3
Tbc1d4	4.40437e-08	0.419633	0.346	0.269	0.000876513	0	Tbc1d4
Rasa3	7.43871e-08	0.306747	0.241	0.16	0.00148038	0	Rasa3
Pou2f2	1.41935e-07	0.498733	0.285	0.194	0.00282465	0	Pou2f2
Crlf3	5.40708e-07	0.358002	0.471	0.432	0.0107606	0	Crlf3
Zbtb20	6.71068e-07	0.366249	0.266	0.198	0.0133549	0	Zbtb20
Gm28438	3.33516e-06	0.346281	0.496	0.476	0.0663731	0	Gm28438
6820431F20Rik	6.67647e-06	0.315635	0.506	0.486	0.132868	0	6820431F20Rik
Klf3	1.60501e-05	0.325283	0.266	0.199	0.319414	0	Klf3
Sidt1	2.80741e-05	0.267965	0.155	0.092	0.558703	0	Sidt1
Tnrc6b	4.76031e-05	0.314502	0.428	0.405	0.947349	0	Tnrc6b
Asap1	5.01843e-05	0.301312	0.196	0.138	0.998718	0	Asap1
Arhgap5	6.07136e-05	0.286372	0.213	0.159	1	0	Arhgap5
Ankrd12	0.000172985	0.302445	0.408	0.39	1	0	Ankrd12
Stk38	0.000183064	0.2755	0.241	0.196	1	0	Stk38
Stk4	0.000215543	0.307213	0.401	0.385	1	0	Stk4
P2ry10	0.000250235	0.292039	0.444	0.44	1	0	P2ry10
Cd8a	0.000302073	0.255923	0.165	0.12	1	0	Cd8a
Prkca	0.000382836	0.30217	0.415	0.398	1	0	Prkca
Ttc3	0.000630923	0.280295	0.176	0.121	1	0	Ttc3
Tnrc6c	0.000763863	0.285089	0.363	0.337	1	0	Tnrc6c
Kbtbd11	0.000790568	0.259874	0.226	0.199	1	0	Kbtbd11
Ssh2	0.00142488	0.277171	0.29	0.255	1	0	Ssh2
Ms4a6c	0.0016572	0.293833	0.17	0.13	1	0	Ms4a6c
Tspan3	0.00200124	0.324535	0.149	0.095	1	0	Tspan3
Cblb	0.00223878	0.295585	0.304	0.284	1	0	Cblb
Arid4a	0.00418691	0.257785	0.331	0.304	1	0	Arid4a
Nek7	0.00915247	0.294397	0.358	0.352	1	0	Nek7
Kcnq1ot1	0.00950111	0.336779	0.311	0.286	1	0	Kcnq1ot1
Cd52	1.79743e-72	0.598173	0.992	0.935	3.57706e-68	1	Cd52
Tmsb10	1.99086e-67	0.401026	1	0.997	3.962e-63	1	Tmsb10
Ccr2	8.05191e-58	0.776172	0.664	0.26	1.60241e-53	1	Ccr2
Ctsw	2.65859e-52	0.695283	0.573	0.23	5.29087e-48	1	Ctsw
Hcst	1.63088e-49	0.555901	0.947	0.753	3.24561e-45	1	Hcst
Ly6c2	1.76471e-40	0.872943	0.284	0.051	3.51195e-36	1	Ly6c2
Ms4a4b	2.04697e-39	0.511218	0.97	0.801	4.07367e-35	1	Ms4a4b
Nkg7	6.04577e-39	0.70959	0.691	0.389	1.20317e-34	1	Nkg7
Actb	4.5692e-37	0.356033	1	0.999	9.09317e-33	1	Actb
Hopx	1.42126e-35	0.561551	0.312	0.08	2.82845e-31	1	Hopx
Pfn1	2.09068e-35	0.376872	0.995	0.949	4.16066e-31	1	Pfn1
Sh3bgrl3	2.7787e-33	0.389629	0.964	0.883	5.52989e-29	1	Sh3bgrl3
S100a6	1.01006e-32	0.556916	0.808	0.593	2.01013e-28	1	S100a6
S100a4	5.348e-32	0.56407	0.76	0.491	1.06431e-27	1	S100a4
Cxcr3	1.19642e-28	0.476936	0.543	0.262	2.38099e-24	1	Cxcr3
Ifitm3	1.48647e-27	0.734798	0.501	0.243	2.95823e-23	1	Ifitm3
Arhgdib	5.93916e-27	0.352396	0.965	0.857	1.18195e-22	1	Arhgdib
S100a10	2.24908e-26	0.360665	0.972	0.898	4.4759e-22	1	S100a10
Cfl1	5.68203e-26	0.283736	0.98	0.922	1.13078e-21	1	Cfl1
Coro1a	2.44762e-23	0.321075	0.978	0.924	4.871e-19	1	Coro1a
Myl6	1.61722e-22	0.267624	0.992	0.934	3.21843e-18	1	Myl6
Id2	2.13979e-22	0.340676	0.84	0.607	4.2584e-18	1	Id2
Cxcr6	4.48825e-22	0.355276	0.736	0.458	8.93207e-18	1	Cxcr6
Anxa1	3.17909e-21	0.402612	0.262	0.094	6.32671e-17	1	Anxa1
Cotl1	1.53786e-20	0.398085	0.841	0.696	3.0605e-16	1	Cotl1
Cap1	1.72354e-20	0.355922	0.769	0.557	3.43002e-16	1	Cap1
Epsti1	8.55836e-20	0.444202	0.521	0.293	1.7032e-15	1	Epsti1
Vim	9.39745e-20	0.358817	0.843	0.642	1.87019e-15	1	Vim
Lgals1	1.30069e-19	0.314236	0.94	0.771	2.58851e-15	1	Lgals1
Ccr5	1.89337e-19	0.361213	0.203	0.059	3.76801e-15	1	Ccr5
Ms4a6b	5.12297e-18	0.313304	0.958	0.857	1.01952e-13	1	Ms4a6b
Gimap4	1.42687e-17	0.296539	0.812	0.614	2.83961e-13	1	Gimap4
Lime1	1.81053e-17	0.350799	0.835	0.665	3.60314e-13	1	Lime1
Gramd3	1.7702e-16	0.280708	0.608	0.367	3.52287e-12	1	Gramd3
Gng2	2.58937e-16	0.323873	0.597	0.404	5.1531e-12	1	Gng2
St3gal6	3.26879e-16	0.28183	0.217	0.08	6.50521e-12	1	St3gal6
Ccnd3	5.73536e-16	0.370858	0.46	0.274	1.14139e-11	1	Ccnd3
Cd7	6.09998e-16	0.307267	0.148	0.04	1.21396e-11	1	Cd7
2020-09-01	7.5127e-16	0.316636	0.772	0.587	1.4951e-11	1	2020-09-01
Gpr183	2.59374e-15	0.353708	0.658	0.448	5.1618e-11	1	Gpr183
AA467197	6.38724e-15	0.31114	0.192	0.073	1.27112e-10	1	AA467197
Ptprcap	6.96655e-15	0.282359	0.721	0.526	1.38641e-10	1	Ptprcap
Lyst	6.97834e-15	0.324646	0.262	0.12	1.38876e-10	1	Lyst
Crip1	1.97335e-14	0.392614	0.835	0.687	3.92716e-10	1	Crip1
Zyx	2.49913e-14	0.316265	0.418	0.235	4.97352e-10	1	Zyx
Ifitm2	7.71992e-14	0.774047	0.488	0.309	1.53634e-09	1	Ifitm2
Zbp1	1.66295e-13	0.336761	0.59	0.408	3.30944e-09	1	Zbp1
Actr3	2.9327e-13	0.256671	0.838	0.703	5.83637e-09	1	Actr3
Cd69	5.57359e-13	0.434081	0.458	0.282	1.1092e-08	1	Cd69
Dok2	5.70303e-13	0.250233	0.575	0.391	1.13496e-08	1	Dok2
Gimap7	9.6649e-13	0.268481	0.534	0.331	1.92341e-08	1	Gimap7
Ifi203	1.6776e-12	0.259916	0.741	0.565	3.33859e-08	1	Ifi203
Sema4a	1.77766e-12	0.278636	0.25	0.113	3.53771e-08	1	Sema4a
Krtcap2	2.95698e-12	0.276249	0.799	0.65	5.88468e-08	1	Krtcap2
Emp3	6.427e-12	0.265766	0.677	0.513	1.27904e-07	1	Emp3
Abracl	7.57259e-12	0.267725	0.829	0.677	1.50702e-07	1	Abracl
Tbx21	9.04213e-11	0.267425	0.234	0.109	1.79947e-06	1	Tbx21
Grap	2.32712e-10	0.267432	0.568	0.364	4.6312e-06	1	Grap
Ifng	1.19463e-09	0.373881	0.292	0.18	2.37743e-05	1	Ifng
Cd48	2.67614e-09	0.259681	0.551	0.397	5.32579e-05	1	Cd48
Dusp2	1.98474e-08	0.285107	0.495	0.366	0.000394982	1	Dusp2
Isg20	2.70048e-08	0.252479	0.279	0.173	0.000537422	1	Isg20
Trac	3.50531e-08	0.272157	0.604	0.457	0.000697592	1	Trac
Isg15	4.55963e-07	0.27308	0.327	0.227	0.00907413	1	Isg15
Gzmb	8.65393e-06	0.548438	0.331	0.23	0.172222	1	Gzmb
Ccl5	0.000169574	0.2983	0.375	0.27	1	1	Ccl5
Hspa8	5.72691e-88	0.893609	0.992	0.933	1.13971e-83	2	Hspa8
Hsp90aa1	1.9081e-83	1.20409	0.973	0.807	3.79731e-79	2	Hsp90aa1
Hsph1	1.90146e-77	1.18597	0.736	0.293	3.78411e-73	2	Hsph1
Dnaja1	2.82774e-77	1.16715	0.907	0.667	5.62748e-73	2	Dnaja1
Hsp90ab1	5.47557e-76	0.946449	0.996	0.952	1.08969e-71	2	Hsp90ab1
Dnajb1	4.2785e-73	1.44773	0.849	0.525	8.51464e-69	2	Dnajb1
Hspe1	6.62583e-64	1.1812	0.872	0.654	1.31861e-59	2	Hspe1
Hspd1	3.0451e-59	1.18009	0.759	0.438	6.06006e-55	2	Hspd1
Cacybp	1.36946e-52	0.853397	0.753	0.459	2.72535e-48	2	Cacybp
Ubb	6.91251e-44	0.665147	0.996	0.991	1.37566e-39	2	Ubb
Hspa1a	3.22691e-43	1.04745	0.864	0.702	6.42187e-39	2	Hspa1a
Junb	1.67351e-41	0.692609	0.944	0.831	3.33046e-37	2	Junb
Klf6	5.14268e-40	0.720273	0.889	0.757	1.02344e-35	2	Klf6
Hspa1b	1.16133e-38	0.900322	0.874	0.722	2.31117e-34	2	Hspa1b
Klf2	1.74015e-38	0.855917	0.872	0.605	3.46307e-34	2	Klf2
Ubc	2.30602e-38	0.785929	0.849	0.649	4.58922e-34	2	Ubc
Mcl1	1.10364e-36	0.56587	0.891	0.773	2.19635e-32	2	Mcl1
Dusp10	1.04578e-35	0.765037	0.571	0.279	2.0812e-31	2	Dusp10
Ier2	6.03776e-35	0.668038	0.742	0.508	1.20158e-30	2	Ier2
Fos	1.73543e-33	0.738342	0.67	0.361	3.45368e-29	2	Fos
Pnrc1	3.05474e-31	0.479209	0.891	0.768	6.07923e-27	2	Pnrc1
Nr4a1	5.14288e-30	0.871341	0.489	0.228	1.02349e-25	2	Nr4a1
Nfkbia	2.73828e-29	0.663029	0.814	0.651	5.44946e-25	2	Nfkbia
Atf3	1.20754e-28	0.89338	0.311	0.11	2.40312e-24	2	Atf3
Gadd45b	6.92823e-27	0.817681	0.584	0.336	1.37879e-22	2	Gadd45b
Ddx5	1.21502e-26	0.309441	0.992	0.956	2.418e-22	2	Ddx5
Coq10b	3.48943e-26	0.54505	0.373	0.15	6.94431e-22	2	Coq10b
Gm15542	6.68432e-26	0.541205	0.282	0.09	1.33025e-21	2	Gm15542
Clk1	3.18103e-25	0.540181	0.656	0.434	6.33057e-21	2	Clk1
Pim1	1.95121e-23	0.534087	0.74	0.548	3.88311e-19	2	Pim1
Cebpb	1.30536e-22	0.549751	0.489	0.261	2.5978e-18	2	Cebpb
Kdm6b	2.7549e-22	0.529845	0.427	0.204	5.48253e-18	2	Kdm6b
Bag3	3.94245e-22	0.482495	0.204	0.047	7.84588e-18	2	Bag3
Btg1	4.90405e-22	0.320405	0.99	0.968	9.75956e-18	2	Btg1
Tagap	2.06553e-21	0.550932	0.371	0.197	4.11062e-17	2	Tagap
Dnaja4	7.07108e-20	0.604883	0.285	0.104	1.40722e-15	2	Dnaja4
Gna13	1.1197e-19	0.411576	0.796	0.628	2.22831e-15	2	Gna13
Cd691	3.32817e-19	0.643415	0.497	0.285	6.6234e-15	2	Cd69
Ifrd1	6.2018e-19	0.652766	0.53	0.342	1.23422e-14	2	Ifrd1
Slc5a3	1.05521e-18	0.536283	0.315	0.132	2.09997e-14	2	Slc5a3
Dusp1	1.72908e-18	0.574424	0.579	0.393	3.44103e-14	2	Dusp1
Jund	2.63104e-18	0.391817	0.99	0.92	5.23603e-14	2	Jund
Ppp1r15a	2.96891e-18	0.459886	0.649	0.484	5.90842e-14	2	Ppp1r15a
Ubald2	4.3301e-17	0.45891	0.61	0.451	8.61734e-13	2	Ubald2
H60b	9.73691e-17	0.400157	0.249	0.096	1.93774e-12	2	H60b
Gm17056	1.74326e-16	0.37376	0.223	0.077	3.46927e-12	2	Gm17056
Zfp36	5.92459e-16	0.617109	0.509	0.339	1.17905e-11	2	Zfp36
Neurl3	6.48056e-16	0.561867	0.584	0.408	1.2897e-11	2	Neurl3
Snx18	1.0415e-15	0.455196	0.344	0.167	2.0727e-11	2	Snx18
Btg2	1.74412e-15	0.395288	0.88	0.791	3.47097e-11	2	Btg2
Ipmk	2.87164e-15	0.520196	0.212	0.073	5.71485e-11	2	Ipmk
Csrnp1	7.12738e-15	0.472877	0.361	0.186	1.41842e-10	2	Csrnp1
Zfand2a	7.21638e-15	0.349417	0.148	0.036	1.43613e-10	2	Zfand2a
Vps37b	3.42295e-14	0.353683	0.757	0.644	6.81201e-10	2	Vps37b
Ahsa1	9.10956e-14	0.432244	0.443	0.292	1.81289e-09	2	Ahsa1
Ier5	1.48989e-13	0.313276	0.738	0.587	2.96503e-09	2	Ier5
Trib2	1.87179e-13	0.409095	0.266	0.133	3.72505e-09	2	Trib2
Tnfaip3	1.88831e-13	0.341991	0.715	0.553	3.75792e-09	2	Tnfaip3
Herpud1	2.43591e-13	0.361553	0.334	0.184	4.8477e-09	2	Herpud1
Mxd1	3.18146e-13	0.397715	0.435	0.261	6.33142e-09	2	Mxd1
S1pr11	3.78351e-13	0.357206	0.518	0.345	7.52956e-09	2	S1pr1
Zc3hav1	4.90877e-13	0.349018	0.625	0.507	9.76894e-09	2	Zc3hav1
Nfkbiz	6.87759e-13	0.439513	0.534	0.38	1.36871e-08	2	Nfkbiz
Cdkn1a	1.36012e-12	0.425461	0.219	0.123	2.70677e-08	2	Cdkn1a
Nfkbid	3.09736e-12	0.539876	0.249	0.124	6.16406e-08	2	Nfkbid
Stip1	5.25386e-12	0.349054	0.348	0.211	1.04557e-07	2	Stip1
Cxcr4	6.74696e-12	0.412885	0.394	0.243	1.34271e-07	2	Cxcr4
Pmaip1	9.15261e-12	0.434365	0.249	0.123	1.82146e-07	2	Pmaip1
Gm15459	1.92807e-11	0.352155	0.254	0.146	3.83706e-07	2	Gm15459
Hmgb2	2.4139e-11	0.319433	0.843	0.772	4.8039e-07	2	Hmgb2
Slc38a2	4.21837e-11	0.314625	0.406	0.269	8.39497e-07	2	Slc38a2
Ccdc117	4.34092e-11	0.297031	0.196	0.085	8.63886e-07	2	Ccdc117
Tgif1	8.82835e-11	0.29924	0.303	0.183	1.75693e-06	2	Tgif1
Esm1	1.05958e-10	0.506296	0.223	0.098	2.10866e-06	2	Esm1
Tra2b	1.29698e-10	0.400614	0.573	0.431	2.58113e-06	2	Tra2b
Siah2	1.63435e-10	0.351147	0.231	0.101	3.25252e-06	2	Siah2
Samhd1	3.03001e-10	0.346914	0.689	0.563	6.03002e-06	2	Samhd1
Irf2bp2	4.82478e-10	0.404874	0.571	0.444	9.60179e-06	2	Irf2bp2
C920009B18Rik	7.57719e-10	0.289346	0.229	0.115	1.50794e-05	2	C920009B18Rik
Socs31	1.38995e-09	0.346503	0.412	0.284	2.76615e-05	2	Socs3
Irf4	2.6759e-09	0.3995	0.216	0.116	5.32531e-05	2	Irf4
Elf1	2.89639e-09	0.321991	0.629	0.512	5.7641e-05	2	Elf1
Tmem64	3.00232e-09	0.422029	0.381	0.253	5.97492e-05	2	Tmem64
Birc3	3.8083e-09	0.324168	0.301	0.188	7.5789e-05	2	Birc3
Dot1l	5.93861e-09	0.295667	0.165	0.07	0.000118184	2	Dot1l
Gm12346	6.13316e-09	0.376982	0.179	0.076	0.000122056	2	Gm12346
Tob2	8.00543e-09	0.391617	0.377	0.237	0.000159316	2	Tob2
Mat2a	1.13798e-08	0.33809	0.419	0.294	0.00022647	2	Mat2a
Tsc22d3	1.67292e-08	0.330518	0.419	0.308	0.000332927	2	Tsc22d3
Arf4	1.80956e-08	0.297297	0.532	0.429	0.000360121	2	Arf4
Rgs2	1.88298e-08	0.520663	0.59	0.442	0.000374731	2	Rgs2
Irf1	1.8898e-08	0.359683	0.485	0.365	0.000376089	2	Irf1
Fosl2	1.98918e-08	0.257919	0.544	0.401	0.000395866	2	Fosl2
Frat2	2.28038e-08	0.28886	0.179	0.086	0.000453819	2	Frat2
Gpr132	2.82446e-08	0.269515	0.462	0.357	0.000562095	2	Gpr132
P4ha1	2.91525e-08	0.324218	0.276	0.168	0.000580163	2	P4ha1
Cd28	2.95708e-08	0.272491	0.751	0.687	0.000588488	2	Cd28
Hspa5	3.25114e-08	0.285617	0.777	0.724	0.000647009	2	Hspa5
Dnajb4	5.04726e-08	0.403884	0.229	0.121	0.00100445	2	Dnajb4
Gm37728	6.54688e-08	0.382885	0.285	0.159	0.00130289	2	Gm37728
Id3	6.94393e-08	0.540756	0.132	0.048	0.00138191	2	Id3
Dedd2	1.14536e-07	0.250723	0.196	0.106	0.00227939	2	Dedd2
Lncpint	1.30057e-07	0.270576	0.318	0.196	0.00258826	2	Lncpint
Swt1	1.35899e-07	0.280209	0.326	0.217	0.00270453	2	Swt1
Phlda1	1.46004e-07	0.529694	0.452	0.333	0.00290564	2	Phlda1
Gm38062	1.86365e-07	0.276511	0.32	0.215	0.00370885	2	Gm38062
Dusp5	2.13031e-07	0.305303	0.482	0.367	0.00423952	2	Dusp5
Got1	2.54834e-07	0.278561	0.355	0.254	0.00507145	2	Got1
Cd40lg	3.021e-07	0.471186	0.412	0.3	0.00601209	2	Cd40lg
Rhob	3.81817e-07	0.270487	0.315	0.214	0.00759854	2	Rhob
Gpbp1	5.11424e-07	0.271424	0.532	0.465	0.0101778	2	Gpbp1
Gm8797	8.3767e-07	0.274486	0.212	0.135	0.0166705	2	Gm8797
Trp53inp1	1.14303e-06	0.280451	0.353	0.254	0.0227474	2	Trp53inp1
Fkbp4	1.82805e-06	0.359666	0.33	0.236	0.03638	2	Fkbp4
Fosb	2.21484e-06	0.39274	0.198	0.109	0.0440776	2	Fosb
Oser1	2.60185e-06	0.283634	0.412	0.3	0.0517795	2	Oser1
[truncated: 972 more rows]
