# Supplementary material for: Combined PD-L1/TGFβ blockade allows expansion and differentiation of stem cell-like CD8 T cells in immune excluded tumors
Source: Nat Commun. 2023 Aug 5;14:4703. doi: 10.1038/s41467-023-40398-4 (PMC10404279; doi:10.1038/s41467-023-40398-4)
Supplement: Supplementary file 4 — Supplementary Data 2 [file 41467_2023_40398_MOESM4_ESM.xlsx]

## Sheet: OBJ0039440_aTGFb_Mouse_DIA_filt
Protein	Label	log2FC	SE	Tvalue	DF	pvalue	adj.pvalue	issue	MissingPercentage	ImputationPercentage	-Log10([pvalue])	gene_name	uniprot_name	description	log10p	abslog2FC	log10adjp	ProteinOriginal
P42337	Combo-Control	3.48467	1.70391	2.0451	30	0.0497033	0.148733	NA	0.15	0	1.30362	Pik3ca	PK3CA_MOUSE	Phosphatidylinositol 4,5-bisphosphate 3-kinase catalytic subunit alpha isoform (PI3-kinase subunit alpha) (PI3K-alpha) (PI3Kalpha) (PtdIns-3-kinase subunit alpha) (EC 2.7.1.153) (Phosphatidylinositol 4,5-bisphosphate 3-kinase 110 kDa catalytic subunit alpha) (PtdIns-3-kinase subunit p110-alpha) (p110alpha) (Phosphoinositide-3-kinase catalytic alpha polypeptide) (Serine/threonine protein kinase PI…	1.30362	3.48467	0.827593	P42337
P01670	Combo-Control	3.26041	0.172983	18.8481	36	0	0	NA	0.279167	0		NA	KV3AI_MOUSE	Ig kappa chain V-III region PC 6684		3.26041	Inf	P01670
P01756	Combo-Control	2.5109	0.180114	13.9406	35	8.88e-16	1.93e-12	NA	0.26	0	15.0515	NA	NA	NA	15.0515	2.5109	11.7148	P01756;P01757;P06330
P29477	Combo-Control	2.42295	0.440732	5.49757	25	1.03e-05	0.000771498	NA	0.904286	0	4.98523	Nos2 Inosl	NOS2_MOUSE	Nitric oxide synthase, inducible (EC 1.14.13.39) (Inducible NO synthase) (Inducible NOS) (iNOS) (Macrophage NOS) (MAC-NOS) (NOS type II) (Peptidyl-cysteine S-nitrosylase NOS2)	4.98523	2.42295	3.11267	P29477
Q9CQ56	Combo-Control	1.89476	0.121822	15.5535	1	0.0408747	0.131758	NA	0.9	0	1.38855	Use1 Use1l	USE1_MOUSE	Vesicle transport protein USE1 (Protein D12) (USE1-like protein)	1.38855	1.89476	0.880223	Q9CQ56
P97457	Combo-Control	1.78671	1.28398	1.39154	36	0.172602	0.336978	NA	0.93741	0	0.762953	Mylpf	MLRS_MOUSE	Myosin regulatory light chain 2, skeletal muscle isoform (Fast skeletal myosin light chain 2) (MLC2F)	0.762953	1.78671	0.472398	P97457
Q8JZL3	Combo-Control	1.69372	0.425364	3.9818	2	0.0576705	0.163698	NA	0.9	0	1.23905	Thtpa	THTPA_MOUSE	Thiamine-triphosphatase (ThTPase) (EC 3.6.1.28)	1.23905	1.69372	0.785957	Q8JZL3
Q8R4U7	Combo-Control	1.65891	0.993128	1.67039	7	0.138768	0.29136	NA	0.85	0	0.85771	Luzp1 Luzp	LUZP1_MOUSE	Leucine zipper protein 1 (Leucine zipper motif-containing protein)	0.85771	1.65891	0.535571	Q8R4U7
P08882	Combo-Control	1.61033	0.519369	3.10054	35	0.00380214	0.0299617	NA	0.503125	0	2.41997	Gzmc Ctla-5 Ctla5	GRAC_MOUSE	Granzyme C (EC 3.4.21.-) (B10) (Cytotoxic cell protease 2) (CCP2)	2.41997	1.61033	1.52343	P08882
Q91Z83	Combo-Control	1.57351	0.938265	1.67705	29	0.104282	0.240846	NA	0.960849	0	0.981792	Myh7	MYH7_MOUSE	Myosin-7 (Myosin heavy chain 7) (Myosin heavy chain slow isoform) (MyHC-slow) (Myosin heavy chain, cardiac muscle beta isoform) (MyHC-beta)	0.981792	1.57351	0.61826	Q91Z83
O09165	Combo-Control	1.56197	0.993546	1.57212	31	0.126075	0.272347	NA	0.842857	0	0.899371	Casq1	CASQ1_MOUSE	Calsequestrin-1 (Calmitine) (Calsequestrin, skeletal muscle isoform)	0.899371	1.56197	0.564877	O09165
P54987	Combo-Control	1.53885	0.293749	5.23865	36	7.23e-06	0.000713732	NA	0.768333	0	5.1407	Acod1 Irg1	IRG1_MOUSE	Cis-aconitate decarboxylase (CAD) (EC 4.1.1.6) (Aconitate decarboxylase) (Aconitate decarboxylase 1) (Cis-aconitic acid decarboxylase) (Immune-responsive gene 1 protein)	5.1407	1.53885	3.14646	P54987
Q3U1J1	Combo-Control	1.52111	0.262759	5.78899	35	1.46e-06	0.000328165	NA	0.05	0	5.83421	Tfpt Amida	TFPT_MOUSE	TCF3 fusion partner homolog (Protein FB1) (Protein amida)	5.83421	1.52111	3.48391	Q3U1J1
P04247	Combo-Control	1.52053	0.76458	1.98871	35	0.0545958	0.158671	NA	0.810976	0	1.26284	Mb	MYG_MOUSE	Myoglobin	1.26284	1.52053	0.799501	P04247
P07310	Combo-Control	1.50801	1.10899	1.35981	36	0.182347	0.348482	NA	0.955238	0	0.739101	Ckm Ckmm	KCRM_MOUSE	Creatine kinase M-type (EC 2.7.3.2) (Creatine kinase M chain) (Creatine phosphokinase M-type) (CPK-M) (M-CK)	0.739101	1.50801	0.457819	P07310
P28776	Combo-Control	1.49684	0.269016	5.56412	30	4.74e-06	0.000527695	NA	0.25	0	5.32424	Ido1 Ido Indo	I23O1_MOUSE	Indoleamine 2,3-dioxygenase 1 (IDO-1) (EC 1.13.11.52) (Indoleamine-pyrrole 2,3-dioxygenase)	5.32424	1.49684	3.27762	P28776
Q9D2C7	Combo-Control	1.45372	0.869299	1.67229	26	0.106461	0.244321	NA	0.3	0	0.972808	Tmbim6 Tegt	BI1_MOUSE	Bax inhibitor 1 (BI-1) (Testis-enhanced gene transcript protein) (Transmembrane BAX inhibitor motif-containing protein 6)	0.972808	1.45372	0.61204	Q9D2C7
Q9Z0M9	Combo-Control	1.45307	0.260853	5.57047	34	3.12e-06	0.000422696	NA	0.1	0	5.50651	Il18bp Igifbp	I18BP_MOUSE	Interleukin-18-binding protein (IL-18BP) (Interferon gamma-inducing factor-binding protein)	5.50651	1.45307	3.37397	Q9Z0M9
P43025	Combo-Control	1.43212	0.187349	7.64414	3	0.00464895	0.0337541	NA	0.8	0	2.33264	Clec3b Tna	TETN_MOUSE	Tetranectin (TN) (C-type lectin domain family 3 member B) (Plasminogen kringle 4-binding protein)	2.33264	1.43212	1.47167	P43025
P11032	Combo-Control	1.42308	0.291807	4.87678	36	2.19e-05	0.00121803	NA	0.0571429	0	4.65994	Gzma Ctla-3 Ctla3 Mtsp-1	GRAA_MOUSE	Granzyme A (EC 3.4.21.78) (Autocrine thymic lymphoma granzyme-like serine protease) (CTLA-3) (Fragmentin-1) (T cell-specific serine protease 1) (TSP-1)	4.65994	1.42308	2.91434	P11032
P04228	Combo-Control	1.40669	0.224935	6.25375	36	3.19e-07	0.000173003	NA	0.645833	0	6.49655	H2-Aa	HA2D_MOUSE	H-2 class II histocompatibility antigen, A-D alpha chain	6.49655	1.40669	3.76195	P04228
Q9DB40	Combo-Control	1.34087	0.525505	2.55158	11	0.0269192	0.100675	NA	0.7	0	1.56994	Med27 Crsp8	MED27_MOUSE	Mediator of RNA polymerase II transcription subunit 27 (Cofactor required for Sp1 transcriptional activation subunit 8) (CRSP complex subunit 8) (Mediator complex subunit 27)	1.56994	1.34087	0.99708	Q9DB40
P01921	Combo-Control	1.3371	0.225696	5.92435	36	8.77e-07	0.000292938	NA	0.845313	0	6.05697	H2-Ab1	HB2D_MOUSE	H-2 class II histocompatibility antigen, A-D beta chain	6.05697	1.3371	3.53322	P01921
O08691	Combo-Control	1.33669	0.251956	5.30524	33	7.5e-06	0.000715296	NA	0.4	0	5.12522	Arg2	ARGI2_MOUSE	Arginase-2, mitochondrial (EC 3.5.3.1) (Arginase II) (Kidney-type arginase) (Non-hepatic arginase) (Type II arginase)	5.12522	1.33669	3.14551	O08691
P13366	Combo-Control	1.33545	0.56462	2.36522	28	0.0251813	0.0972752	NA	0.483333	0	1.59892	Gzmg	GRAG_MOUSE	Granzyme G (EC 3.4.21.-) (CTL serine protease 1) (MCSP-1)	1.59892	1.33545	1.012	P13366
P05977	Combo-Control	1.33347	1.46363	0.911071	36	0.368318	0.549001	NA	0.917094	0	0.433777	Myl1 Mylf	MYL1_MOUSE	Myosin light chain 1/3, skeletal muscle isoform (MLC1/MLC3) (MLC1F/MLC3F) (Myosin light chain alkali 1/2) (Myosin light chain A1/A2)	0.433777	1.33347	0.260427	P05977
P31001	Combo-Control	1.33323	0.827438	1.61128	36	0.115854	0.258898	NA	0.913551	0	0.936089	Des	DESM_MOUSE	Desmin	0.936089	1.33323	0.586872	P31001
P09528	Combo-Control	1.32027	0.471692	2.79901	36	0.00818618	0.0475828	NA	0.893617	0	2.08692	Fth1 Fth	FRIH_MOUSE	Ferritin heavy chain (Ferritin H subunit) (EC 1.16.3.1) [Cleaved into: Ferritin heavy chain, N-terminally processed]	2.08692	1.32027	1.32255	P09528
P13542	Combo-Control	1.31974	1.0022	1.31684	31	0.197545	0.365306	NA	0.75	0	0.704334	Myh8 Myhsp	MYH8_MOUSE	Myosin-8 (Myosin heavy chain 8) (Myosin heavy chain, skeletal muscle, perinatal) (MyHC-perinatal)	0.704334	1.31974	0.437343	P13542
P06802	Combo-Control	1.30158	1.12198	1.16007	12	0.268579	0.446467	NA	0.896667	0	0.570927	Enpp1 Npps Pc1 Pdnp1	ENPP1_MOUSE	Ectonucleotide pyrophosphatase/phosphodiesterase family member 1 (E-NPP 1) (Lymphocyte antigen 41) (Ly-41) (Phosphodiesterase I/nucleotide pyrophosphatase 1) (Plasma-cell membrane glycoprotein PC-1) [Cleaved into: Ectonucleotide pyrophosphatase/phosphodiesterase family member 1, secreted form] [Includes: Alkaline phosphodiesterase I (EC 3.1.4.1); Nucleotide pyrophosphatase (NPPase) (EC 3.6.1.9) (…	0.570927	1.30158	0.350211	P06802
P04224	Combo-Control	1.27276	0.223818	5.68659	35	2e-06	0.000335339	NA	0.166667	0	5.69913	NA	HA22_MOUSE	H-2 class II histocompatibility antigen, E-K alpha chain	5.69913	1.27276	3.47452	P04224
P02535	Combo-Control	1.25343	1.14261	1.09699	10	0.298358	0.478209	NA	0.980702	0	0.525263	Krt10 Krt1-10	K1C10_MOUSE	Keratin, type I cytoskeletal 10 (56 kDa cytokeratin) (Cytokeratin-10) (CK-10) (Keratin, type I cytoskeletal 59 kDa) (Keratin-10) (K10)	0.525263	1.25343	0.320382	P02535
O55123	Combo-Control	1.23736	0.662052	1.86897	8	0.0985625	0.232734	NA	0.7	0	1.00629	NA	NA	NA	1.00629	1.23736	0.633141	O55123;P28862
Q8VEH5	Combo-Control	1.22659	0.227957	5.38081	36	4.67e-06	0.000527695	NA	0	0	5.33038	Epm2aip1 Kiaa0766	EPMIP_MOUSE	EPM2A-interacting protein 1 (Laforin-interacting protein)	5.33038	1.22659	3.27762	Q8VEH5
P04441	Combo-Control	1.22138	0.213657	5.71653	36	1.66e-06	0.000328204	NA	0.5225	0	5.77912	Cd74 Ii	HG2A_MOUSE	H-2 class II histocompatibility antigen gamma chain (Ia antigen-associated invariant chain) (Ii) (MHC class II-associated invariant chain) (CD antigen CD74) [Cleaved into: Class-II-associated invariant chain peptide (CLIP)]	5.77912	1.22138	3.48386	P04441
Q61176	Combo-Control	1.21996	0.26397	4.62158	36	4.75e-05	0.00203783	NA	0.94186	0	4.32367	Arg1	ARGI1_MOUSE	Arginase-1 (EC 3.5.3.1) (Liver-type arginase) (Type I arginase)	4.32367	1.21996	2.69083	Q61176
P19137	Combo-Control	1.21754	0.296946	4.1002	36	0.000224805	0.0053339	NA	0.980985	0	3.64819	Lama1 Lama Lama-1	LAMA1_MOUSE	Laminin subunit alpha-1 (Laminin A chain) (Laminin-1 subunit alpha) (Laminin-3 subunit alpha) (S-laminin subunit alpha) (S-LAM alpha)	3.64819	1.21754	2.27296	P19137
P01915	Combo-Control	1.18911	0.233495	5.09264	36	1.13e-05	0.000790786	NA	0.637037	0	4.94629	NA	HB22_MOUSE	H-2 class II histocompatibility antigen, E-D beta chain	4.94629	1.18911	3.10194	P01915
P97447	Combo-Control	1.16324	0.934399	1.2449	36	0.22121	0.39413	NA	0.878472	0	0.655195	Fhl1	FHL1_MOUSE	Four and a half LIM domains protein 1 (FHL-1) (KyoT) (RBP-associated molecule 14-1) (RAM14-1) (Skeletal muscle LIM-protein 1) (SLIM) (SLIM-1)	0.655195	1.16324	0.404361	P97447
O70370	Combo-Control	1.15452	0.220363	5.23916	36	7.22e-06	0.000713732	NA	0.788889	0	5.14139	Ctss Cats	CATS_MOUSE	Cathepsin S (EC 3.4.22.27)	5.14139	1.15452	3.14646	O70370
Q8CFB4	Combo-Control	1.1454	0.196786	5.82054	36	1.21e-06	0.000328165	NA	0.839344	0	5.91821	Gbp5	GBP5_MOUSE	Guanylate-binding protein 5 (EC 3.6.5.-) (GTP-binding protein 5) (GBP-5) (MuGBP-5) (Guanine nucleotide-binding protein 5)	5.91821	1.1454	3.48391	Q8CFB4
Q5SX40	Combo-Control	1.1344	1.35061	0.839918	36	0.406498	0.584829	NA	0.990603	0	0.390941	Myh1	MYH1_MOUSE	Myosin-1 (Myosin heavy chain 1) (Myosin heavy chain 2x) (MyHC-2x) (Myosin heavy chain, skeletal muscle, adult 1)	0.390941	1.1344	0.232971	Q5SX40
Q8VI78	Combo-Control	1.11959	0.314939	3.55496	11	0.00451263	0.0332159	NA	0.7	0	2.34557	Pla1a Pspla1	PLA1A_MOUSE	Phospholipase A1 member A (EC 3.1.1.-) (Phosphatidylserine-specific phospholipase A1) (PS-PLA1)	2.34557	1.11959	1.47865	Q8VI78
Q8BTJ4	Combo-Control	1.11235	0.168611	6.59716	35	1.27e-07	0.000138156	NA	0.383333	0	6.89526	Enpp4 Kiaa0879	ENPP4_MOUSE	Bis(5'-adenosyl)-triphosphatase enpp4 (EC 3.6.1.29) (AP3A hydrolase) (AP3Aase) (Ectonucleotide pyrophosphatase/phosphodiesterase family member 4) (E-NPP 4) (NPP-4)	6.89526	1.11235	3.85963	Q8BTJ4
Q8C163	Combo-Control	1.10579	0.256136	4.31721	33	0.000135612	0.00390922	NA	0.25	0	3.8677	Exog Endogl1	EXOG_MOUSE	Nuclease EXOG, mitochondrial (EC 3.1.30.-) (Endonuclease G-like 1) (Endo G-like 1)	3.8677	1.10579	2.40791	Q8C163
P56528	Combo-Control	1.09619	0.228459	4.79822	36	2.78e-05	0.00137118	NA	0.15	0	4.55611	Cd38	CD38_MOUSE	ADP-ribosyl cyclase/cyclic ADP-ribose hydrolase 1 (EC 3.2.2.6) (2'-phospho-ADP-ribosyl cyclase) (2'-phospho-ADP-ribosyl cyclase/2'-phospho-cyclic-ADP-ribose transferase) (EC 2.4.99.20) (2'-phospho-cyclic-ADP-ribose transferase) (ADP-ribosyl cyclase 1) (ADPRC 1) (Cyclic ADP-ribose hydrolase 1) (cADPr hydrolase 1) (I-19) (NIM-R5 antigen) (CD antigen CD38)	4.55611	1.09619	2.86291	P56528
Q9JI91	Combo-Control	1.08337	1.12579	0.962318	36	0.34231	0.523454	NA	0.933465	0	0.465581	Actn2	ACTN2_MOUSE	Alpha-actinin-2 (Alpha-actinin skeletal muscle isoform 2) (F-actin cross-linking protein)	0.465581	1.08337	0.281122	Q9JI91
P34902	Combo-Control	1.08273	0.288738	3.74987	31	0.000728293	0.0104365	NA	0.2	0	3.13769	Il2rg	IL2RG_MOUSE	Cytokine receptor common subunit gamma (Interleukin-2 receptor subunit gamma) (IL-2 receptor subunit gamma) (IL-2R subunit gamma) (IL-2RG) (gammaC) (p64) (CD antigen CD132)	3.13769	1.08273	1.98145	P34902
P04945	Combo-Control	1.0791	1.33922	0.805765	4	0.465551	0.638719	NA	0.816667	0	0.332032	NA	KV6AB_MOUSE	Ig kappa chain V-VI region NQ2-6.1	0.332032	1.0791	0.19469	P04945
P29391	Combo-Control	1.078	0.502464	2.14543	36	0.0387365	0.127791	NA	0.852985	0	1.41188	Ftl1 Ftl Ftl-1	FRIL1_MOUSE	Ferritin light chain 1 (Ferritin L subunit 1)	1.41188	1.078	0.893501	P29391
Q5I2A0	Combo-Control	1.07731	0.231976	4.64405	36	4.43e-05	0.00194761	NA	0.844737	0	4.35316	Serpina3g Spi2A	SPA3G_MOUSE	Serine protease inhibitor A3G (Serpin A3G) (Serine protease inhibitor 2A) (Serpin 2A)	4.35316	1.07731	2.7105	Q5I2A0
P13412	Combo-Control	1.07681	1.12273	0.959095	34	0.344282	0.525469	NA	0.87459	0	0.463085	Tnni2	TNNI2_MOUSE	Troponin I, fast skeletal muscle (Troponin I, fast-twitch isoform)	0.463085	1.07681	0.279453	P13412
P10493	Combo-Control	1.07667	0.26356	4.08509	36	0.000235007	0.00545668	NA	0.953271	0	3.62892	Nid1 Ent	NID1_MOUSE	Nidogen-1 (NID-1) (Entactin)	3.62892	1.07667	2.26307	P10493
P02468	Combo-Control	1.05614	0.253069	4.17333	36	0.000181234	0.00452268	NA	0.973958	0	3.74176	Lamc1 Lamb-2 Lamc-1	LAMC1_MOUSE	Laminin subunit gamma-1 (Laminin B2 chain) (Laminin-1 subunit gamma) (Laminin-10 subunit gamma) (Laminin-11 subunit gamma) (Laminin-2 subunit gamma) (Laminin-3 subunit gamma) (Laminin-4 subunit gamma) (Laminin-6 subunit gamma) (Laminin-7 subunit gamma) (Laminin-8 subunit gamma) (Laminin-9 subunit gamma) (S-laminin subunit gamma) (S-LAM gamma)	3.74176	1.05614	2.3446	P02468
Q9QZ47	Combo-Control	1.04673	0.813545	1.28663	30	0.208064	0.377736	NA	0.893919	0	0.681803	Tnnt3	TNNT3_MOUSE	Troponin T, fast skeletal muscle (TnTf) (Fast skeletal muscle troponin T) (fTnT)	0.681803	1.04673	0.422811	Q9QZ47
P13541	Combo-Control	1.04524	0.979702	1.0669	35	0.293322	0.472056	NA	0.593182	0	0.532655	Myh3 Myhse	MYH3_MOUSE	Myosin-3 (Myosin heavy chain 3)	0.532655	1.04524	0.326007	P13541
P21845	Combo-Control	1.04045	0.297416	3.4983	36	0.00126496	0.0146465	NA	0.453571	0	2.89792	Tpsb2 Mcpt6	TRYB2_MOUSE	Tryptase beta-2 (Tryptase-2) (EC 3.4.21.59) (Mast cell protease 6) (mMCP-6)	2.89792	1.04045	1.83427	P21845
P12804	Combo-Control	1.03491	0.238425	4.34059	28	0.000167597	0.0044415	NA	0.475	0	3.77573	Fgl2 Fiblp	FGL2_MOUSE	Fibroleukin (Cytotoxic T-lymphocyte-specific protein) (Fibrinogen-like protein 2) (Prothrombinase)	3.77573	1.03491	2.35247	P12804
P35737	Combo-Control	1.03163	0.243983	4.2283	36	0.000154034	0.00428729	NA	0.391667	0	3.81238	H2-DMb1 H-2Mb1 Mb	DMB_MOUSE	Class II histocompatibility antigen, M beta 1 chain (H2-M beta 1 chain)	3.81238	1.03163	2.36782	P35737
P02469	Combo-Control	1.02664	0.245098	4.18872	36	0.000173176	0.00452268	NA	0.982308	0	3.76151	Lamb1 Lamb-1 Lamb1-1	LAMB1_MOUSE	Laminin subunit beta-1 (Laminin B1 chain) (Laminin-1 subunit beta) (Laminin-10 subunit beta) (Laminin-12 subunit beta) (Laminin-2 subunit beta) (Laminin-6 subunit beta) (Laminin-8 subunit beta)	3.76151	1.02664	2.3446	P02469
Q8CGA3	Combo-Control	1.01753	0.284355	3.57836	24	0.00151706	0.0168037	NA	0.3	0	2.819	Slc43a2 Lat4	LAT4_MOUSE	Large neutral amino acids transporter small subunit 4 (L-type amino acid transporter 4) (Solute carrier family 43 member 2)	2.819	1.01753	1.77459	Q8CGA3
Q05816	Combo-Control	1.01688	0.272216	3.73555	36	0.000647197	0.00970992	NA	0.714286	0	3.18896	Fabp5 Fabpe Klbp Mal1	FABP5_MOUSE	Fatty acid-binding protein 5 (Epidermal-type fatty acid-binding protein) (E-FABP) (Fatty acid-binding protein, epidermal) (Keratinocyte lipid-binding protein) (Psoriasis-associated fatty acid-binding protein homolog) (PA-FABP)	3.18896	1.01688	2.01278	Q05816
Q5SX39	Combo-Control	1.01472	1.55444	0.65279	36	0.518039	0.681614	NA	0.983091	0	0.285637	Myh4	MYH4_MOUSE	Myosin-4 (Myosin heavy chain 2b) (MyHC-2b) (Myosin heavy chain 4)	0.285637	1.01472	0.166462	Q5SX39
P09542	Combo-Control	1.00682	0.829766	1.21338	27	0.235494	0.411764	NA	0.796341	0	0.62802	Myl3 Mlc1v Mylc	MYL3_MOUSE	Myosin light chain 3 (Myosin alkali light chain 1, ventricular/slow skeletal muscle isoform) (Myosin light chain 1, slow-twitch muscle B/ventricular isoform) (MLC1SB)	0.62802	1.00682	0.385352	P09542
O88990	Combo-Control	1.00081	1.00393	0.996896	31	0.326533	0.507467	NA	0.952632	0	0.486072	Actn3	ACTN3_MOUSE	Alpha-actinin-3 (Alpha-actinin skeletal muscle isoform 3) (F-actin cross-linking protein)	0.486072	1.00081	0.294593	O88990
Q04690	Combo-Control	0.998996	0.431551	2.3149	35	0.0266055	0.100192	NA	0.0166667	0	1.57503	Nf1	NF1_MOUSE	Neurofibromin (Neurofibromatosis-related protein NF-1)	1.57503	0.998996	0.999167	Q04690
P51667	Combo-Control	0.998616	0.646834	1.54385	24	0.135709	0.287718	NA	0.707407	0	0.867393	Myl2 Mylpc	MLRV_MOUSE	Myosin regulatory light chain 2, ventricular/cardiac muscle isoform (MLC-2) (MLC-2v) (Myosin light chain 2, slow skeletal/ventricular muscle isoform) (MLC-2s/v)	0.867393	0.998616	0.541033	P51667
Q61207	Combo-Control	0.98764	0.163298	6.0481	36	5.99e-07	0.000216888	NA	0.892473	0	6.22227	Psap Sgp1	SAP_MOUSE	Prosaposin (Sulfated glycoprotein 1) (SGP-1) [Cleaved into: Saposin-A; Saposin-B-Val; Saposin-B; Saposin-C; Saposin-D]	6.22227	0.98764	3.66376	Q61207
Q3T9E4	Combo-Control	0.981328	0.197606	4.96609	36	1.67e-05	0.00100491	NA	0.878205	0	4.77823	NA	NA	NA	4.77823	0.981328	2.99787	Q3T9E4;Q62293
P13597	Combo-Control	0.980205	0.152395	6.43199	36	1.85e-07	0.000142064	NA	0.484211	0	6.73365	Icam1 Icam-1	ICAM1_MOUSE	Intercellular adhesion molecule 1 (ICAM-1) (MALA-2) (MyD10) (CD antigen CD54)	6.73365	0.980205	3.84752	P13597
Q9QZ85	Combo-Control	0.979251	0.193021	5.07328	36	1.2e-05	0.000814621	NA	0.912281	0	4.92055	Iigp1 Irga6	IIGP1_MOUSE	Interferon-inducible GTPase 1 (EC 3.6.5.-)	4.92055	0.979251	3.08904	Q9QZ85
P49935	Combo-Control	0.962617	0.227052	4.23962	36	0.00014895	0.00417253	NA	0.225	0	3.82696	Ctsh	CATH_MOUSE	Pro-cathepsin H (Cathepsin B3) (Cathepsin BA) [Cleaved into: Cathepsin H mini chain; Cathepsin H (EC 3.4.22.16); Cathepsin H heavy chain; Cathepsin H light chain]	3.82696	0.962617	2.3796	P49935
P0C8B4	Combo-Control	0.960073	0.414364	2.31698	15	0.0350537	0.120394	NA	0.683333	0	1.45527	Gon7	GON7_MOUSE	EKC/KEOPS complex subunit GON7	1.45527	0.960073	0.919394	P0C8B4
Q60660	Combo-Control	0.956892	0.287231	3.33143	1	0.185647	0.35034	NA	0.85	0	0.731312	Klra2 Ly49-b Ly49b	KLRA2_MOUSE	Killer cell lectin-like receptor 2 (Lymphocyte antigen 49b) (Ly-49b) (T-cell surface glycoprotein Ly-49B)	0.731312	0.956892	0.45551	Q60660
Q9D7V9	Combo-Control	0.934217	0.235918	3.95992	31	0.000408304	0.0074804	NA	0.51	0	3.38902	Naaa Asahl	NAAA_MOUSE	N-acylethanolamine-hydrolyzing acid amidase (EC 3.5.1.60) (N-acylsphingosine amidohydrolase-like) (ASAH-like protein) [Cleaved into: N-acylethanolamine-hydrolyzing acid amidase subunit alpha; N-acylethanolamine-hydrolyzing acid amidase subunit beta]	3.38902	0.934217	2.12608	Q9D7V9
Q6PIC6	Combo-Control	0.928712	2.39345	0.388022	1	0.764363	0.86677	NA	0.85	0	0.1167	Atp1a3	AT1A3_MOUSE	Sodium/potassium-transporting ATPase subunit alpha-3 (Na(+)/K(+) ATPase alpha-3 subunit) (EC 7.2.2.13) (Na(+)/K(+) ATPase alpha(III) subunit) (Sodium pump subunit alpha-3)	0.1167	0.928712	0.062096	Q6PIC6
Q9CRC9	Combo-Control	0.90018	0.515109	1.74755	9	0.114484	0.257026	NA	0.875	0	0.941256	Gnpda2 Kiaa4008	GNPI2_MOUSE	Glucosamine-6-phosphate isomerase 2 (EC 3.5.99.6) (Glucosamine-6-phosphate deaminase 2) (GNPDA 2) (GlcN6P deaminase 2)	0.941256	0.90018	0.590022	Q9CRC9
Q61001	Combo-Control	0.885267	0.143221	6.18112	36	3.98e-07	0.000176728	NA	0.513636	0	6.39976	Lama5	LAMA5_MOUSE	Laminin subunit alpha-5 (Laminin-10 subunit alpha) (Laminin-11 subunit alpha) (Laminin-15 subunit alpha)	6.39976	0.885267	3.7527	Q61001
P04187	Combo-Control	0.882299	0.281439	3.13496	33	0.00359849	0.0290304	NA	0.436364	0	2.44388	Gzmb Ctla-1 Ctla1	GRAB_MOUSE	Granzyme B(G,H) (EC 3.4.21.79) (CTLA-1) (Cytotoxic cell protease 1) (CCP1) (Fragmentin-2)	2.44388	0.882299	1.53715	P04187
P06339	Combo-Control	0.881486	0.275783	3.19631	33	0.00306277	0.0265971	NA	0.433333	0	2.51389	H2-T23	HA15_MOUSE	H-2 class I histocompatibility antigen, D-37 alpha chain	2.51389	0.881486	1.57517	P06339
P82343	Combo-Control	0.878245	0.14989	5.85927	25	4.12e-06	0.000496568	NA	0.625	0	5.38541	Renbp	RENBP_MOUSE	N-acylglucosamine 2-epimerase (AGE) (EC 5.1.3.8) (GlcNAc 2-epimerase) (N-acetyl-D-glucosamine 2-epimerase) (Renin-binding protein) (RnBP)	5.38541	0.878245	3.30402	P82343
Q3U7U3	Combo-Control	0.876394	0.386127	2.26971	5	0.0724655	0.18966	NA	0.766667	0	1.13987	Fbxo7	FBX7_MOUSE	F-box only protein 7	1.13987	0.876394	0.722025	Q3U7U3
P97426	Combo-Control	0.870788	0.214883	4.05238	36	0.000258667	0.00588028	NA	0.3	0	3.58726	Ear1	ECP1_MOUSE	Eosinophil cationic protein 1 (ECP 1) (EC 3.1.27.-) (Eosinophil secondary granule ribonuclease 1) (EAR-1) (Ribonuclease 3-1) (RNase 3-1)	3.58726	0.870788	2.2306	P97426
Q9QY24	Combo-Control	0.867594	0.143383	6.05089	36	5.94e-07	0.000216888	NA	0.685484	0	6.22601	Zbp1 Dlm1	ZBP1_MOUSE	Z-DNA-binding protein 1 (DNA-dependent activator of IFN-regulatory factors) (DAI) (Tumor stroma and activated macrophage protein DLM-1)	6.22601	0.867594	3.66376	Q9QY24
P42225	Combo-Control	0.86386	0.169779	5.08813	36	1.15e-05	0.000790786	NA	0.950739	0	4.94029	Stat1	STAT1_MOUSE	Signal transducer and activator of transcription 1	4.94029	0.86386	3.10194	P42225
P09671	Combo-Control	0.863859	0.148948	5.79976	36	1.29e-06	0.000328165	NA	0.795833	0	5.89042	Sod2 Sod-2	SODM_MOUSE	Superoxide dismutase [Mn], mitochondrial (EC 1.15.1.1)	5.89042	0.863859	3.48391	P09671
Q9CX80	Combo-Control	0.853859	0.288656	2.95806	36	0.00544121	0.0370891	NA	0	0	2.2643	Cygb	CYGB_MOUSE	Cytoglobin (Histoglobin) (HGb)	2.2643	0.853859	1.43075	Q9CX80
Q8BHZ0	Combo-Control	0.849556	0.295653	2.87349	34	0.00694957	0.0429232	NA	0.3	0	2.15804	Fam49a D12Ertd553e	FA49A_MOUSE	Protein FAM49A	2.15804	0.849556	1.36731	Q8BHZ0
P49710	Combo-Control	0.838525	0.14585	5.74921	36	1.5e-06	0.000328165	NA	0.803922	0	5.82283	Hcls1 Hs1	HCLS1_MOUSE	Hematopoietic lineage cell-specific protein (Hematopoietic cell-specific LYN substrate 1) (LckBP1)	5.82283	0.838525	3.48391	P49710
O88668	Combo-Control	0.827582	0.412147	2.00797	36	0.0521954	0.15387	NA	0.1	0	1.28237	Creg1 Creg	CREG1_MOUSE	Protein CREG1 (Cellular repressor of E1A-stimulated genes 1)	1.28237	0.827582	0.812845	O88668
Q8VCI0	Combo-Control	0.827312	0.198331	4.17137	36	0.000182282	0.00452268	NA	0.57619	0	3.73926	Plbd1	PLBL1_MOUSE	Phospholipase B-like 1 (EC 3.1.1.-) (LAMA-like protein 1) (Lamina ancestor homolog 1) (Phospholipase B domain-containing protein 1) [Cleaved into: Phospholipase B-like 1 chain A; Phospholipase B-like 1 chain B; Phospholipase B-like 1 chain C]	3.73926	0.827312	2.3446	Q8VCI0
P18242	Combo-Control	0.826167	0.160712	5.14067	36	9.77e-06	0.000771498	NA	0.894737	0	5.01019	Ctsd	CATD_MOUSE	Cathepsin D (EC 3.4.23.5)	5.01019	0.826167	3.11267	P18242
P16627	Combo-Control	0.825719	0.495638	1.66597	10	0.126688	0.273127	NA	0.741667	0	0.897266	Hspa1l Hsc70t	HS71L_MOUSE	Heat shock 70 kDa protein 1-like (Heat shock 70 kDa protein 1L) (Heat shock 70 kDa-like protein 1) (Spermatid-specific heat shock protein 70)	0.897266	0.825719	0.563635	P16627
Q9QXH4	Combo-Control	0.825703	0.494304	1.67043	11	0.12301	0.26759	NA	0.65	0	0.910059	Itgax	ITAX_MOUSE	Integrin alpha-X (CD11 antigen-like family member C) (Leukocyte adhesion glycoprotein p150,95 alpha chain) (Leukocyte adhesion receptor p150,95) (CD antigen CD11c)	0.910059	0.825703	0.57253	Q9QXH4
O70200	Combo-Control	0.8232	0.157659	5.2214	36	7.63e-06	0.000715296	NA	0.335714	0	5.1177	Aif1 Iba1	AIF1_MOUSE	Allograft inflammatory factor 1 (AIF-1) (Ionized calcium-binding adapter molecule 1)	5.1177	0.8232	3.14551	O70200
P58058	Combo-Control	0.822014	0.368874	2.22844	14	0.0427548	0.135406	NA	0.7	0	1.36901	Nadk	NADK_MOUSE	NAD kinase (EC 2.7.1.23) (Poly(P)/ATP NAD kinase)	1.36901	0.822014	0.868362	P58058
Q8R502	Combo-Control	0.821826	0.310475	2.64699	19	0.0159031	0.0723052	NA	0.35	0	1.79852	Lrrc8c Ad158 Fad158	LRC8C_MOUSE	Volume-regulated anion channel subunit LRRC8C (Factor for adipocyte differentiation 158) (Leucine-rich repeat-containing protein 8C)	1.79852	0.821826	1.14083	Q8R502
Q3UBZ5	Combo-Control	0.821292	0.277378	2.96092	28	0.00618622	0.0400306	NA	0.25	0	2.20857	Mif4gd	MI4GD_MOUSE	MIF4G domain-containing protein	2.20857	0.821292	1.39761	Q3UBZ5
Q80X19	Combo-Control	0.818535	0.208086	3.93364	36	0.000365748	0.00705293	NA	0.918333	0	3.43682	Col14a1	COEA1_MOUSE	Collagen alpha-1(XIV) chain	3.43682	0.818535	2.15163	Q80X19
E9Q557	Combo-Control	0.817837	0.431457	1.89552	36	0.066074	0.178195	NA	0.475	0	1.17997	Dsp	DESP_MOUSE	Desmoplakin (DP)	1.17997	0.817837	0.749106	E9Q557
P24063	Combo-Control	0.81663	0.144715	5.64303	36	2.09e-06	0.000335339	NA	0.735484	0	5.68084	Itgal Lfa-1 Ly-15	ITAL_MOUSE	Integrin alpha-L (CD11 antigen-like family member A) (Leukocyte adhesion glycoprotein LFA-1 alpha chain) (LFA-1A) (Leukocyte function-associated molecule 1 alpha chain) (Lymphocyte antigen 15) (Ly-15) (CD antigen CD11a)	5.68084	0.81663	3.47452	P24063
Q1XH17	Combo-Control	0.809231	0.568554	1.42331	26	0.166535	0.328381	NA	0.793333	0	0.778494	Trim72 Mg53	TRI72_MOUSE	Tripartite motif-containing protein 72 (Mitsugumin-53) (Mg53)	0.778494	0.809231	0.483622	Q1XH17
P49290	Combo-Control	0.799753	0.19975	4.00378	36	0.000298178	0.00631742	NA	0.866216	0	3.52552	Epx Eper	PERE_MOUSE	Eosinophil peroxidase (EPO) (EC 1.11.1.7) [Cleaved into: Eosinophil peroxidase light chain; Eosinophil peroxidase heavy chain]	3.52552	0.799753	2.19946	P49290
Q9WUB3	Combo-Control	0.798559	0.725817	1.10022	36	0.278539	0.457269	NA	0.957981	0	0.555115	Pygm	PYGM_MOUSE	Glycogen phosphorylase, muscle form (EC 2.4.1.1) (Myophosphorylase)	0.555115	0.798559	0.339829	Q9WUB3
P41317	Combo-Control	0.797461	0.263038	3.03173	35	0.00455566	0.0333569	NA	0.20625	0	2.34145	Mbl2	MBL2_MOUSE	Mannose-binding protein C (MBP-C) (Mannan-binding protein) (RA-reactive factor P28A subunit) (RARF/P28A)	2.34145	0.797461	1.47681	P41317
P18528	Combo-Control	0.792226	0.517367	1.53126	6	0.176584	0.341072	NA	0.75	0	0.753048	NA	HVM57_MOUSE	Ig heavy chain V region 6.96	0.753048	0.792226	0.467154	P18528
P0CW02	Combo-Control	0.79177	0.140309	5.64306	36	2.09e-06	0.000335339	NA	0.166667	0	5.68088	Ly6c1	LY6C1_MOUSE	Lymphocyte antigen 6C1 (Ly-6C1)	5.68088	0.79177	3.47452	P0CW02
A0A0B4J1G0	Combo-Control	0.79165	0.151058	5.24069	35	7.74e-06	0.000715296	NA	0.275	0	5.11111	Fcgr4	FCGR4_MOUSE	Low affinity immunoglobulin gamma Fc region receptor IV (CD16-2) (FcgammaRIV)	5.11111	0.79165	3.14551	A0A0B4J1G0
Q8R429	Combo-Control	0.787995	0.805209	0.978621	36	0.334298	0.51674	NA	0.961446	0	0.475866	Atp2a1	AT2A1_MOUSE	Sarcoplasmic/endoplasmic reticulum calcium ATPase 1 (SERCA1) (SR Ca(2+)-ATPase 1) (EC 7.2.2.10) (Calcium pump 1) (Calcium-transporting ATPase sarcoplasmic reticulum type, fast twitch skeletal muscle isoform) (Endoplasmic reticulum class 1/2 Ca(2+) ATPase)	0.475866	0.787995	0.286728	Q8R429
P23927	Combo-Control	0.787983	0.653558	1.20568	36	0.235805	0.412019	NA	0.867361	0	0.627446	Cryab Crya2	CRYAB_MOUSE	Alpha-crystallin B chain (Alpha(B)-crystallin) (P23)	0.627446	0.787983	0.385083	P23927
P08883	Combo-Control	0.787742	0.618778	1.27306	34	0.211633	0.382401	NA	0.416667	0	0.674417	Gzmf Ccp4 Ctla-7 Ctla7	GRAF_MOUSE	Granzyme F (EC 3.4.21.-) (C134) (CTL serine protease 3) (Cytotoxic cell protease 4) (CCP4) (Cytotoxic serine protease 3) (MCSP3)	0.674417	0.787742	0.417481	P08883
Q91WM2	Combo-Control	0.786218	0.296525	2.65144	2	0.117663	0.260526	NA	0.9	0	0.929362	Hdhd5 Cecr5	HDHD5_MOUSE	Haloacid dehalogenase-like hydrolase domain-containing 5 (Cat eye syndrome critical region protein 5 homolog)	0.929362	0.786218	0.584149	Q91WM2
Q9WUU7	Combo-Control	0.782207	0.137885	5.67288	36	1.9e-06	0.000335339	NA	0.626	0	5.72076	Ctsz	CATZ_MOUSE	Cathepsin Z (EC 3.4.18.1)	5.72076	0.782207	3.47452	Q9WUU7
P43883	Combo-Control	0.781755	0.175181	4.46254	36	7.66e-05	0.00266095	NA	0.779167	0	4.11574	Plin2 Adfp Adrp	PLIN2_MOUSE	Perilipin-2 (Adipophilin) (Adipose differentiation-related protein) (ADRP)	4.11574	0.781755	2.57496	P43883
Q9Z2A9	Combo-Control	0.781713	0.169649	4.60781	36	4.95e-05	0.00208564	NA	0.416667	0	4.30561	Ggt5 Ggtla1	GGT5_MOUSE	Glutathione hydrolase 5 proenzyme (EC 3.4.19.13) (Gamma-glutamyl leukotrienase) (GGL) (Gamma-glutamyltransferase 5) (GGT 5) (EC 2.3.2.2) (Gamma-glutamyltransferase-like activity 1) (Gamma-glutamyltranspeptidase 5) (Leukotriene-C4 hydrolase) (EC 3.4.19.14) [Cleaved into: Glutathione hydrolase 5 heavy chain; Glutathione hydrolase 5 light chain]	4.30561	0.781713	2.68076	Q9Z2A9
Q01514	Combo-Control	0.779475	0.188402	4.13731	36	0.000201549	0.0048618	NA	0.936306	0	3.69562	Gbp1 Gbp-1 Mag-1 Mpa1	GBP1_MOUSE	Guanylate-binding protein 1 (EC 3.6.5.-) (GTP-binding protein 1) (GBP-1) (mGBP-1) (mGBP1) (Guanine nucleotide-binding protein 1) (Interferon-gamma-inducible protein MAG-1) (Interferon-induced guanylate-binding protein 1)	3.69562	0.779475	2.3132	Q01514
Q9EPB4	Combo-Control	0.776699	0.168163	4.61873	36	4.79e-05	0.00203783	NA	0.230769	0	4.31992	Pycard Asc	ASC_MOUSE	Apoptosis-associated speck-like protein containing a CARD (mASC) (PYD and CARD domain-containing protein)	4.31992	0.776699	2.69083	Q9EPB4
P21844	Combo-Control	0.77515	0.260687	2.97349	36	0.00522686	0.0363409	NA	0.220833	0	2.28176	Cma1 Mcpt5	CMA1_MOUSE	Chymase (EC 3.4.21.39) (Alpha-chymase) (Mast cell chymase 1) (Mast cell protease 5) (mMCP-5) (Mast cell protease I)	2.28176	0.77515	1.4396	P21844
Q91X72	Combo-Control	0.77334	0.274327	2.81904	36	0.00778021	0.045899	NA	0.914783	0	2.10901	Hpx Hpxn	HEMO_MOUSE	Hemopexin	2.10901	0.77334	1.3382	Q91X72
Q9CRB6	Combo-Control	0.771405	0.212468	3.6307	36	0.000871966	0.0118315	NA	0.109091	0	3.0595	Tppp3	TPPP3_MOUSE	Tubulin polymerization-promoting protein family member 3	3.0595	0.771405	1.92696	Q9CRB6
P20065	Combo-Control	0.770467	0.154445	4.98863	36	1.56e-05	0.000993234	NA	0.761905	0	4.80813	Tmsb4x Ptmb4 Tmsb4	TYB4_MOUSE	Thymosin beta-4 (T beta 4) [Cleaved into: Hematopoietic system regulatory peptide (Seraspenide)]	4.80813	0.770467	3.00295	P20065
Q60710	Combo-Control	0.76887	0.150765	5.09981	36	1.11e-05	0.000788022	NA	0.960282	0	4.95582	Samhd1 Mg21	SAMH1_MOUSE	Deoxynucleoside triphosphate triphosphohydrolase SAMHD1 (dNTPase) (EC 3.1.5.-) (Interferon-gamma-inducible protein Mg11) (SAM domain and HD domain-containing protein 1) (mSAMHD1)	4.95582	0.76887	3.10346	Q60710
Q3TRM8	Combo-Control	0.763377	0.175236	4.35629	36	0.000105276	0.00336111	NA	0.930072	0	3.97767	Hk3	HXK3_MOUSE	Hexokinase-3 (EC 2.7.1.1) (Hexokinase type III) (HK III) (Hexokinase-C)	3.97767	0.763377	2.47352	Q3TRM8
Q6ZQ06	Combo-Control	0.762706	0.347539	2.19459	34	0.0351218	0.120457	NA	0.1	0	1.45442	Cep162 Kiaa1009 Qn1	CE162_MOUSE	Centrosomal protein of 162 kDa (Cep162) (Protein QN1 homolog)	1.45442	0.762706	0.919167	Q6ZQ06
P39654	Combo-Control	0.760384	0.287433	2.64543	35	0.0121371	0.061019	NA	0.478571	0	1.91588	Alox15 Alox12l	LOX15_MOUSE	Arachidonate 15-lipoxygenase (15-LOX) (EC 1.13.11.33) (12/15-lipoxygenase) (12/15-LO) (Arachidonate 12-lipoxygenase, leukocyte-type) (12-LOX) (L-12LO) (EC 1.13.11.31) (Arachidonate omega-6 lipoxygenase)	1.91588	0.760384	1.21454	P39654
P97425	Combo-Control	0.759744	0.189353	4.0123	36	0.000290845	0.00625173	NA	0.581579	0	3.53634	Ear2 Rnase2	ECP2_MOUSE	Eosinophil cationic protein 2 (ECP 2) (EC 3.1.27.-) (Eosinophil secondary granule ribonuclease 2) (EAR-2) (Ribonuclease 3-2) (RNase 3-2)	3.53634	0.759744	2.204	P97425
Q3UDK1	Combo-Control	0.754925	0.171421	4.40391	36	9.13e-05	0.00304328	NA	0.75	0	4.03947	Trafd1 Fln29	TRAD1_MOUSE	TRAF-type zinc finger domain-containing protein 1 (Protein FLN29)	4.03947	0.754925	2.51666	Q3UDK1
Q61554	Combo-Control	0.754779	0.176544	4.27531	36	0.000133982	0.00390437	NA	0.967434	0	3.87295	Fbn1 Fbn-1	FBN1_MOUSE	Fibrillin-1 [Cleaved into: Asprosin]	3.87295	0.754779	2.40845	Q61554
Q8CG14	Combo-Control	0.74411	0.228018	3.26338	36	0.00241565	0.0225565	NA	0.486667	0	2.61697	C1sa C1s	CS1A_MOUSE	Complement C1s-A subcomponent (EC 3.4.21.42) (C1 esterase) (Complement component 1 subcomponent s-A) [Cleaved into: Complement C1s-A subcomponent heavy chain; Complement C1s-A subcomponent light chain]	2.61697	0.74411	1.64673	Q8CG14
Q9QUH0	Combo-Control	0.74316	0.166801	4.45536	36	7.83e-05	0.00269735	NA	0.642857	0	4.10638	Glrx Glrx1 Grx Grx1	GLRX1_MOUSE	Glutaredoxin-1 (Thioltransferase-1) (TTase-1)	4.10638	0.74316	2.56906	Q9QUH0
O70131	Combo-Control	0.738909	0.224467	3.29184	35	0.00227962	0.0218502	NA	0.05	0	2.64214	Ninj1	NINJ1_MOUSE	Ninjurin-1 (Nerve injury-induced protein 1)	2.64214	0.738909	1.66055	O70131
Q60952	Combo-Control	0.738564	0.299332	2.46738	23	0.021482	0.087995	NA	0.4	0	1.66793	Cep250 Cep2 Inmp	CP250_MOUSE	Centrosome-associated protein CEP250 (250 kDa centrosomal protein) (Cep250) (Centrosomal Nek2-associated protein 1) (C-Nap1) (Centrosomal protein 2) (Intranuclear matrix protein)	1.66793	0.738564	1.05554	Q60952
Q60766	Combo-Control	0.72927	0.153427	4.75321	36	3.19e-05	0.00153706	NA	0.860563	0	4.49676	Irgm1 Ifi1 Iigp3 Irgm	IRGM1_MOUSE	Immunity-related GTPase family M protein 1 (EC 3.6.5.-) (Interferon-inducible GTPase 3) (Interferon-inducible protein 1) (LPS-stimulated RAW 264.7 macrophage protein 47) (LRG-47)	4.49676	0.72927	2.81331	Q60766
O88531	Combo-Control	0.729105	0.184483	3.95215	36	0.000346584	0.00690307	NA	0.7	0	3.46019	Ppt1 Cln1 Ppt	PPT1_MOUSE	Palmitoyl-protein thioesterase 1 (PPT-1) (EC 3.1.2.22) (Palmitoyl-protein hydrolase 1)	3.46019	0.729105	2.16096	O88531
Q64455	Combo-Control	0.725341	0.136394	5.31797	29	1.05e-05	0.000771498	NA	0.583333	0	4.9795	Ptprj Byp Scc1	PTPRJ_MOUSE	Receptor-type tyrosine-protein phosphatase eta (Protein-tyrosine phosphatase eta) (R-PTP-eta) (EC 3.1.3.48) (HPTP beta-like tyrosine phosphatase) (Protein-tyrosine phosphatase receptor type J) (R-PTP-J) (Susceptibility to colon cancer 1) (CD antigen CD148)	4.9795	0.725341	3.11267	Q64455
Q8K352	Combo-Control	0.720286	0.12539	5.74438	36	1.53e-06	0.000328165	NA	0.35	0	5.81637	Sash3 Sly	SASH3_MOUSE	SAM and SH3 domain-containing protein 3 (SH3 protein expressed in lymphocytes)	5.81637	0.720286	3.48391	Q8K352
Q62148	Combo-Control	0.719729	0.442704	1.62576	27	0.115619	0.258638	NA	0.2	0	0.936973	Aldh1a2 Aldh1a7 Raldh2	AL1A2_MOUSE	Retinal dehydrogenase 2 (RALDH 2) (RalDH2) (EC 1.2.1.36) (Aldehyde dehydrogenase family 1 member A2) (Retinaldehyde-specific dehydrogenase type 2) (RALDH(II))	0.936973	0.719729	0.587308	Q62148
Q91YX0	Combo-Control	0.719093	0.113036	6.36161	36	2.29e-07	0.000142064	NA	0.44375	0	6.64011	Themis2 Icb1	THMS2_MOUSE	Protein THEMIS2 (Induced by contact to basement membrane 1 protein) (Protein ICB-1) (Thymocyte-expressed molecule involved in selection protein 2)	6.64011	0.719093	3.84752	Q91YX0
P13745	Combo-Control	0.714486	0.294428	2.42669	36	0.0203718	0.0852159	NA	0.0125	0	1.69097	Gsta1 Gsta Gstya	GSTA1_MOUSE	Glutathione S-transferase A1 (EC 2.5.1.18) (13-hydroperoxyoctadecadienoate peroxidase) (EC 1.11.1.-) (Androst-5-ene-3,17-dione isomerase) (EC 5.3.3.-) (GST class-alpha member 1) (Glutathione S-transferase Ya) (Glutathione S-transferase Ya1) [Cleaved into: Glutathione S-transferase A1, N-terminally processed]	1.69097	0.714486	1.06948	P13745
Q9DBB8	Combo-Control	0.71287	0.228292	3.12262	29	0.00404033	0.0312155	NA	0.541667	0	2.39358	Dhdh	DHDH_MOUSE	Trans-1,2-dihydrobenzene-1,2-diol dehydrogenase (EC 1.3.1.20) (D-xylose 1-dehydrogenase) (D-xylose-NADP dehydrogenase) (EC 1.1.1.179) (Dimeric dihydrodiol dehydrogenase)	2.39358	0.71287	1.50563	Q9DBB8
Q69ZK0	Combo-Control	0.712029	0.242862	2.93183	28	0.00664462	0.0417525	NA	0.583333	0	2.17753	Prex1 Kiaa1415	PREX1_MOUSE	Phosphatidylinositol 3,4,5-trisphosphate-dependent Rac exchanger 1 protein (P-Rex1) (PtdIns(3,4,5)-dependent Rac exchanger 1)	2.17753	0.712029	1.37932	Q69ZK0
Q8VD31	Combo-Control	0.711319	0.168759	4.21501	26	0.000266348	0.00602334	NA	0.690909	0	3.57455	Tapbpl	TPSNR_MOUSE	Tapasin-related protein (TAPASIN-R) (TAP-binding protein-like) (TAP-binding protein-related protein) (TAPBP-R) (Tapasin-like)	3.57455	0.711319	2.22016	Q8VD31
P16125	Combo-Control	0.708156	0.269587	2.62682	36	0.0125812	0.0626464	NA	0.411765	0	1.90028	Ldhb Ldh-2 Ldh2	LDHB_MOUSE	L-lactate dehydrogenase B chain (LDH-B) (EC 1.1.1.27) (LDH heart subunit) (LDH-H)	1.90028	0.708156	1.2031	P16125
P16015	Combo-Control	0.704728	0.408045	1.72708	36	0.0927249	0.222437	NA	0.932886	0	1.0328	Ca3 Car3	CAH3_MOUSE	Carbonic anhydrase 3 (EC 4.2.1.1) (Carbonate dehydratase III) (Carbonic anhydrase III) (CA-III)	1.0328	0.704728	0.652792	P16015
Q8BG07	Combo-Control	0.699266	0.167364	4.1781	36	0.000178694	0.00452268	NA	0.767857	0	3.74789	Pld4	PLD4_MOUSE	5'-3' exonuclease PLD4 (EC 3.1.16.1) (Choline phosphatase 4) (Phosphatidylcholine-hydrolyzing phospholipase D4) (Phospholipase D4) (PLD 4)	3.74789	0.699266	2.3446	Q8BG07
Q60648	Combo-Control	0.695465	0.146972	4.73197	36	3.4e-05	0.00162137	NA	0.57	0	4.46877	Gm2a	SAP3_MOUSE	Ganglioside GM2 activator (Cerebroside sulfate activator protein) (GM2-AP) (Sphingolipid activator protein 3) (SAP-3)	4.46877	0.695465	2.79012	Q60648
Q62234	Combo-Control	0.692807	1.09586	0.632205	33	0.531609	0.694836	NA	0.903571	0	0.274408	Myom1	MYOM1_MOUSE	Myomesin-1 (Myomesin family member 1) (Skelemin)	0.274408	0.692807	0.158117	Q62234
Q01149	Combo-Control	0.690074	0.355662	1.94025	36	0.0602129	0.168674	NA	0.923077	0	1.22031	Col1a2 Cola2	CO1A2_MOUSE	Collagen alpha-2(I) chain (Alpha-2 type I collagen)	1.22031	0.690074	0.772953	Q01149
P32507	Combo-Control	0.689819	0.171043	4.033	27	0.000405547	0.00746138	NA	0.6	0	3.39196	Nectin2 Mph Pvr Pvrl2 Pvs	NECT2_MOUSE	Nectin-2 (Herpes virus entry mediator B) (Herpesvirus entry mediator B) (HveB) (Murine herpes virus entry protein B) (mHveB) (Nectin cell adhesion molecule 2) (Poliovirus receptor homolog) (Poliovirus receptor-related protein 2) (CD antigen CD112)	3.39196	0.689819	2.12718	P32507
P28654	Combo-Control	0.689767	0.234352	2.94329	36	0.00565396	0.0376808	NA	0.87803	0	2.24765	Dcn	PGS2_MOUSE	Decorin (Bone proteoglycan II) (PG-S2) (PG40)	2.24765	0.689767	1.42388	P28654
A1L314	Combo-Control	0.689511	0.160582	4.29381	36	0.000126812	0.00379281	NA	0.605556	0	3.89684	Mpeg1	MPEG1_MOUSE	Macrophage-expressed gene 1 protein (Macrophage gene 1 protein) (Mpg-1) (Perforin-2) (P-2) (Protein MPS1)	3.89684	0.689511	2.42104	A1L314
P97797	Combo-Control	0.687037	0.142387	4.82515	36	2.56e-05	0.00127789	NA	0.171429	0	4.59168	Sirpa Bit Myd1 Ptpns1 Shps1 Sirp	SHPS1_MOUSE	Tyrosine-protein phosphatase non-receptor type substrate 1 (SHP substrate 1) (SHPS-1) (Brain Ig-like molecule with tyrosine-based activation motifs) (Bit) (CD172 antigen-like family member A) (Inhibitory receptor SHPS-1) (MyD-1 antigen) (Signal-regulatory protein alpha-1) (Sirp-alpha-1) (mSIRP-alpha1) (p84) (CD antigen CD172a)	4.59168	0.687037	2.89351	P97797
Q61462	Combo-Control	0.684105	0.159842	4.27987	36	0.000132177	0.00387778	NA	0.330769	0	3.87884	Cyba	CY24A_MOUSE	Cytochrome b-245 light chain (Cytochrome b(558) alpha chain) (Cytochrome b558 subunit alpha) (Neutrophil cytochrome b 22 kDa polypeptide) (Superoxide-generating NADPH oxidase light chain subunit) (p22 phagocyte B-cytochrome) (p22-phox) (p22phox)	3.87884	0.684105	2.41142	Q61462
P15089	Combo-Control	0.682851	0.230901	2.95734	36	0.00545136	0.0371	NA	0.56	0	2.26349	Cpa3	CBPA3_MOUSE	Mast cell carboxypeptidase A (MC-CPA) (EC 3.4.17.1) (Carboxypeptidase A3)	2.26349	0.682851	1.43063	P15089
P62748	Combo-Control	0.680088	0.231117	2.94262	28	0.00647096	0.040984	NA	0.2	0	2.18903	Hpcal1	HPCL1_MOUSE	Hippocalcin-like protein 1 (Neural visinin-like protein 3) (NVL-3) (NVP-3) (Visinin-like protein 3) (VILIP-3)	2.18903	0.680088	1.38739	P62748
P41216	Combo-Control	0.679402	0.216025	3.14501	36	0.00332307	0.0278064	NA	0.886806	0	2.47846	Acsl1 Acsl2 Facl2	ACSL1_MOUSE	Long-chain-fatty-acid--CoA ligase 1 (EC 6.2.1.3) (Arachidonate--CoA ligase) (EC 6.2.1.15) (Long-chain acyl-CoA synthetase 1) (LACS 1) (Phytanate--CoA ligase) (EC 6.2.1.24)	2.47846	0.679402	1.55585	P41216
Q61133	Combo-Control	0.679287	0.237845	2.85601	14	0.0126984	0.0629496	NA	0.6	0	1.89625	Gstt2	GSTT2_MOUSE	Glutathione S-transferase theta-2 (EC 2.5.1.18) (GST class-theta-2)	1.89625	0.679287	1.20101	Q61133
Q8K3G5	Combo-Control	0.679074	0.142258	4.77355	1	0.131463	0.280635	NA	0.85	0	0.881197	Vrk3	VRK3_MOUSE	Inactive serine/threonine-protein kinase VRK3 (Serine/threonine-protein pseudokinase VRK3) (Vaccinia-related kinase 3)	0.881197	0.679074	0.551858	Q8K3G5
Q8BHJ5	Combo-Control	0.678778	0.319938	2.12159	24	0.0443925	0.138521	NA	0.4	0	1.35269	Tbl1xr1 Ira1 Tblr1	TBL1R_MOUSE	F-box-like/WD repeat-containing protein TBL1XR1 (Nuclear receptor corepressor/HDAC3 complex subunit TBLR1) (TBL1-related protein 1) (Transducin beta-like 1X-related protein 1)	1.35269	0.678778	0.858485	Q8BHJ5
Q9QZZ6	Combo-Control	0.677506	0.336482	2.0135	36	0.0515844	0.152793	NA	0.40625	0	1.28748	Dpt	DERM_MOUSE	Dermatopontin (Early quiescence protein 1) (EQ-1) (Tyrosine-rich acidic matrix protein) (TRAMP)	1.28748	0.677506	0.815896	Q9QZZ6
P70429	Combo-Control	0.67733	0.13955	4.85367	36	2.35e-05	0.0012431	NA	0.798438	0	4.62937	Evl	EVL_MOUSE	Ena/VASP-like protein (Ena/vasodilator-stimulated phosphoprotein-like)	4.62937	0.67733	2.90549	P70429
P29387	Combo-Control	0.676686	0.358525	1.88741	36	0.0671873	0.180413	NA	0	0	1.17271	Gnb4	GBB4_MOUSE	Guanine nucleotide-binding protein subunit beta-4 (Transducin beta chain 4)	1.17271	0.676686	0.743733	P29387
P05533	Combo-Control	0.676506	0.340154	1.98882	20	0.0605769	0.169475	NA	0.7	0	1.21769	Ly6a Ly6	LY6A_MOUSE	Lymphocyte antigen 6A-2/6E-1 (Ly-6A.2/Ly-6E.1) (Stem cell antigen 1) (SCA-1) (T-cell-activating protein) (TAP)	1.21769	0.676506	0.770895	P05533
Q3TXU5	Combo-Control	0.675438	0.892045	0.757179	9	0.468301	0.641642	NA	0.775	0	0.329475	Dhps	DHYS_MOUSE	Deoxyhypusine synthase (DHS) (EC 2.5.1.46)	0.329475	0.675438	0.192707	Q3TXU5
Q8C547	Combo-Control	0.67382	0.503996	1.33695	9	0.214046	0.385158	NA	0.7	0	0.669493	Heatr5b Kiaa1414	HTR5B_MOUSE	HEAT repeat-containing protein 5B	0.669493	0.67382	0.414361	Q8C547
Q99J39	Combo-Control	0.669393	0.277625	2.41114	13	0.0314227	0.112665	NA	0.758333	0	1.50276	Mlycd	DCMC_MOUSE	Malonyl-CoA decarboxylase, mitochondrial (MCD) (EC 4.1.1.9)	1.50276	0.669393	0.948211	Q99J39
P21995	Combo-Control	0.66789	0.122998	5.43008	36	4.02e-06	0.000496568	NA	0.391667	0	5.39618	Emb Gp70	EMB_MOUSE	Embigin (Teratocarcinoma glycoprotein Gp-70)	5.39618	0.66789	3.30402	P21995
O08997	Combo-Control	0.665748	0.119193	5.58544	36	2.49e-06	0.000386101	NA	0.6875	0	5.60383	Atox1	ATOX1_MOUSE	Copper transport protein ATOX1 (Metal transport protein ATX1)	5.60383	0.665748	3.4133	O08997
P70441	Combo-Control	0.665158	0.10401	6.39516	36	2.07e-07	0.000142064	NA	0.552273	0	6.68472	Slc9a3r1 Nherf Nherf1	NHRF1_MOUSE	Na(+)/H(+) exchange regulatory cofactor NHE-RF1 (NHERF-1) (Ezrin-radixin-moesin-binding phosphoprotein 50) (EBP50) (Regulatory cofactor of Na(+)/H(+) exchanger) (Sodium-hydrogen exchanger regulatory factor 1) (Solute carrier family 9 isoform A3 regulatory factor 1)	6.68472	0.665158	3.84752	P70441
Q9R069	Combo-Control	0.66439	0.269942	2.46123	27	0.0205249	0.0856915	NA	0.3	0	1.68772	Bcam Gplu Lu	BCAM_MOUSE	Basal cell adhesion molecule (B-CAM cell surface glycoprotein) (Lutheran antigen) (CD antigen CD239)	1.68772	0.66439	1.06706	Q9R069
O88536	Combo-Control	0.663929	0.153391	4.32834	34	0.000125173	0.00377431	NA	0.05	0	3.90249	Fpr2 Fpr-rs2	FPR2_MOUSE	Formyl peptide receptor 2 (Formylpeptide receptor-related sequence 2) (Lipoxin A4 receptor-like protein) (N-formylpeptide receptor-like 2)	3.90249	0.663929	2.42316	O88536
Q99KR3	Combo-Control	0.660944	0.203547	3.24713	19	0.00424098	0.0320861	NA	0.666667	0	2.37253	Lactb2	LACB2_MOUSE	Endoribonuclease LACTB2 (Beta-lactamase-like protein 2) (EC 3.1.27.-)	2.37253	0.660944	1.49368	Q99KR3
P26645	Combo-Control	0.660483	0.147781	4.46935	36	7.51e-05	0.0026282	NA	0.72	0	4.12461	Marcks Macs	MARCS_MOUSE	Myristoylated alanine-rich C-kinase substrate (MARCKS)	4.12461	0.660483	2.58034	P26645
Q8C6I2	Combo-Control	0.659363	0.174326	3.78236	36	0.000566032	0.00916806	NA	0.2	0	3.24716	Sdhaf2 Pgl2 Sdh5	SDHF2_MOUSE	Succinate dehydrogenase assembly factor 2, mitochondrial (SDH assembly factor 2) (SDHAF2)	3.24716	0.659363	2.03772	Q8C6I2
P09581	Combo-Control	0.657373	0.162491	4.04559	34	0.000284099	0.0062082	NA	0.35	0	3.54653	Csf1r Csfmr Fms	CSF1R_MOUSE	Macrophage colony-stimulating factor 1 receptor (CSF-1 receptor) (CSF-1-R) (CSF-1R) (M-CSF-R) (EC 2.7.10.1) (Proto-oncogene c-Fms) (CD antigen CD115)	3.54653	0.657373	2.20703	P09581
Q9JK53	Combo-Control	0.657239	0.221101	2.97257	36	0.00523938	0.0363409	NA	0.760526	0	2.28072	Prelp	PRELP_MOUSE	Prolargin (Proline-arginine-rich end leucine-rich repeat protein)	2.28072	0.657239	1.4396	Q9JK53
P97290	Combo-Control	0.6547	0.268461	2.43871	36	0.0198016	0.0835603	NA	0.672222	0	1.7033	Serping1 C1nh	IC1_MOUSE	Plasma protease C1 inhibitor (C1 Inh) (C1Inh) (C1 esterase inhibitor) (C1-inhibiting factor) (Serpin G1)	1.7033	0.6547	1.078	P97290
P97484	Combo-Control	0.652199	0.32639	1.99822	12	0.0688696	0.183006	NA	0.65	0	1.16197	Lilrb3 Pirb	LIRB3_MOUSE	Leukocyte immunoglobulin-like receptor subfamily B member 3 (LIR-3) (Leukocyte immunoglobulin-like receptor 3) (Cell-surface glycoprotein p91) (Paired immunoglobulin-like receptor B) (PIR-B)	1.16197	0.652199	0.737535	P97484
D3Z6Q9	Combo-Control	0.650972	0.138326	4.70607	36	3.68e-05	0.00171607	NA	0.65	0	4.43467	Bin2	BIN2_MOUSE	Bridging integrator 2	4.43467	0.650972	2.76547	D3Z6Q9
Q61096	Combo-Control	0.650811	0.167523	3.88491	36	0.000421229	0.00762074	NA	0.698387	0	3.37548	Prtn3	PRTN3_MOUSE	Myeloblastin (EC 3.4.21.76) (Proteinase 3) (PR-3)	3.37548	0.650811	2.118	Q61096
Q62192	Combo-Control	0.650665	0.13392	4.85859	36	2.31e-05	0.0012431	NA	0.712069	0	4.63587	Cd180 Ly78 Rp105	CD180_MOUSE	CD180 antigen (Lymphocyte antigen 78) (Ly-78) (Radioprotective 105 kDa protein) (CD antigen CD180)	4.63587	0.650665	2.90549	Q62192
Q9QYH6	Combo-Control	0.649414	0.463246	1.40188	13	0.184375	0.349785	NA	0.8	0	0.734298	Maged1 Nrage	MAGD1_MOUSE	Melanoma-associated antigen D1 (Dlxin-1) (MAGE-D1 antigen) (Neurotrophin receptor-interacting MAGE homolog)	0.734298	0.649414	0.456198	Q9QYH6
Q99M15	Combo-Control	0.649368	0.148453	4.37423	36	9.98e-05	0.00323329	NA	0.275	0	4.00094	Pstpip2 Mayp	PPIP2_MOUSE	Proline-serine-threonine phosphatase-interacting protein 2 (PEST phosphatase-interacting protein 2) (Macrophage actin-associated tyrosine-phosphorylated protein) (pp37)	4.00094	0.649368	2.49036	Q99M15
P53564	Combo-Control	0.648245	0.303121	2.13857	16	0.0482411	0.145884	NA	0.55	0	1.31658	NA	NA	NA	1.31658	0.648245	0.835991	P53564;P70403
Q61093	Combo-Control	0.645393	0.131824	4.89588	36	2.06e-05	0.0011641	NA	0.827083	0	4.68521	Cybb Cgd	CY24B_MOUSE	Cytochrome b-245 heavy chain (EC 1.-.-.-) (CGD91-phox) (Cytochrome b(558) subunit beta) (Cytochrome b558 subunit beta) (Heme-binding membrane glycoprotein gp91phox) (Neutrophil cytochrome b 91 kDa polypeptide) (gp91-1) (gp91-phox) (p22 phagocyte B-cytochrome)	4.68521	0.645393	2.93401	Q61093
P01867	Combo-Control	0.644061	0.38329	1.68035	34	0.102056	0.238113	NA	0.1	0	0.991161	Igh-3	IGG2B_MOUSE	Ig gamma-2B chain C region	0.991161	0.644061	0.623218	P01867
Q8CGE8	Combo-Control	0.642127	0.117674	5.45682	36	3.7e-06	0.000472386	NA	0.01875	0	5.43191	Ifi205a Ifi205	IFI5A_MOUSE	Interferon-activable protein 205-A (Ifi-205-A) (Interferon-inducible protein p205-A) (Protein D3')	5.43191	0.642127	3.3257	Q8CGE8
Q80YV3	Combo-Control	0.640127	0.46325	1.38182	7	0.209516	0.379049	NA	0.716667	0	0.678783	Trrap	TRRAP_MOUSE	Transformation/transcription domain-associated protein (Tra1 homolog)	0.678783	0.640127	0.421304	Q80YV3
P27005	Combo-Control	0.63722	0.310545	2.05194	36	0.0475029	0.14515	NA	0.84386	0	1.32328	S100a8 Caga Mrp8	S10A8_MOUSE	Protein S100-A8 (Calgranulin-A) (Chemotactic cytokine CP-10) (Leukocyte L1 complex light chain) (Migration inhibitory factor-related protein 8) (MRP-8) (p8) (Pro-inflammatory S100 cytokine) (S100 calcium-binding protein A8)	1.32328	0.63722	0.838184	P27005
Q61549	Combo-Control	0.636772	0.187526	3.39565	34	0.00175718	0.0186544	NA	0.566667	0	2.75518	Adgre1 Emr1 Gpf480	AGRE1_MOUSE	Adhesion G protein-coupled receptor E1 (Cell surface glycoprotein F4/80) (EGF-like module receptor 1) (EGF-like module-containing mucin-like hormone receptor-like 1) (EMR1 hormone receptor)	2.75518	0.636772	1.72922	Q61549
Q9D1A2	Combo-Control	0.636384	0.110855	5.74068	36	1.54e-06	0.000328165	NA	0.920635	0	5.81143	Cndp2 Cn2	CNDP2_MOUSE	Cytosolic non-specific dipeptidase (EC 3.4.13.18) (CNDP dipeptidase 2) (Glutamate carboxypeptidase-like protein 1)	5.81143	0.636384	3.48391	Q9D1A2
Q70IV5	Combo-Control	0.633899	0.709988	0.892831	34	0.378224	0.558968	NA	0	0	0.422251	Synm Dmn Kiaa0353	SYNEM_MOUSE	Synemin (Desmuslin)	0.422251	0.633899	0.252613	Q70IV5
P45700	Combo-Control	0.631262	0.150541	4.19329	9	0.00232973	0.0220385	NA	0.7	0	2.63269	Man1a1 Man1a	MA1A1_MOUSE	Mannosyl-oligosaccharide 1,2-alpha-mannosidase IA (EC 3.2.1.113) (Man(9)-alpha-mannosidase) (Man9-mannosidase) (Mannosidase alpha class 1A member 1) (Processing alpha-1,2-mannosidase IA) (Alpha-1,2-mannosidase IA)	2.63269	0.631262	1.65682	P45700
P20801	Combo-Control	0.630911	0.958631	0.658138	31	0.515308	0.679388	NA	0.520588	0	0.287933	Tnnc2 Tncs	TNNC2_MOUSE	Troponin C, skeletal muscle (STNC)	0.287933	0.630911	0.167882	P20801
O89023	Combo-Control	0.629703	0.145387	4.33123	36	0.000113443	0.00356644	NA	0	0	3.94522	Tpp1 Cln2	TPP1_MOUSE	Tripeptidyl-peptidase 1 (TPP-1) (EC 3.4.14.9) (Lysosomal pepstatin-insensitive protease) (LPIC) (Tripeptidyl aminopeptidase) (Tripeptidyl-peptidase I) (TPP-I)	3.94522	0.629703	2.44776	O89023
O70209	Combo-Control	0.626823	0.627076	0.999596	27	0.326381	0.507467	NA	0.48	0	0.486275	Pdlim3	PDLI3_MOUSE	PDZ and LIM domain protein 3 (Actinin-associated LIM protein) (Alpha-actinin-2-associated LIM protein)	0.486275	0.626823	0.294593	O70209
Q99KQ4	Combo-Control	0.626821	0.142481	4.39933	36	9.26e-05	0.00304507	NA	0.913043	0	4.03352	Nampt Pbef1	NAMPT_MOUSE	Nicotinamide phosphoribosyltransferase (NAmPRTase) (Nampt) (EC 2.4.2.12) (Pre-B-cell colony-enhancing factor 1 homolog) (PBEF) (Visfatin)	4.03352	0.626821	2.5164	Q99KQ4
Q9D8Y0	Combo-Control	0.619258	0.138147	4.48259	36	7.21e-05	0.00256715	NA	0.793617	0	4.14188	Efhd2 Sws1	EFHD2_MOUSE	EF-hand domain-containing protein D2 (Swiprosin-1)	4.14188	0.619258	2.59055	Q9D8Y0
Q8VHC3	Combo-Control	0.618958	0.14297	4.32928	36	0.000114106	0.00356644	NA	0.25	0	3.94269	Selenom	SELM_MOUSE	Selenoprotein M (SelM)	3.94269	0.618958	2.44776	Q8VHC3
P11087	Combo-Control	0.617862	0.358729	1.72237	36	0.0935858	0.223884	NA	0.929577	0	1.02879	Col1a1 Cola1	CO1A1_MOUSE	Collagen alpha-1(I) chain (Alpha-1 type I collagen)	1.02879	0.617862	0.649977	P11087
P99029	Combo-Control	0.61713	0.170799	3.61319	36	0.000916205	0.0120186	NA	0.874051	0	3.03801	Prdx5 Prdx6	PRDX5_MOUSE	Peroxiredoxin-5, mitochondrial (EC 1.11.1.15) (Antioxidant enzyme B166) (AOEB166) (Liver tissue 2D-page spot 2D-0014IV) (PLP) (Peroxiredoxin V) (Prx-V) (Peroxisomal antioxidant enzyme) (Thioredoxin peroxidase PMP20)	3.03801	0.61713	1.92015	P99029
P21812	Combo-Control	0.616998	0.249452	2.47342	36	0.0182359	0.0787862	NA	0.640741	0	1.73907	Mcpt4	MCPT4_MOUSE	Mast cell protease 4 (mMCP-4) (EC 3.4.21.-) (MSMCP) (Myonase) (Serosal mast cell protease)	1.73907	0.616998	1.10355	P21812
Q99MB1	Combo-Control	0.612292	0.106253	5.76258	35	1.59e-06	0.000328165	NA	0.175	0	5.79938	Tlr3	TLR3_MOUSE	Toll-like receptor 3 (CD antigen CD283)	5.79938	0.612292	3.48391	Q99MB1
Q9WV54	Combo-Control	0.611589	0.19503	3.13588	36	0.00340516	0.0281623	NA	0.81125	0	2.46786	Asah1 Asah	ASAH1_MOUSE	Acid ceramidase (AC) (ACDase) (Acid CDase) (EC 3.5.1.23) (Acylsphingosine deacylase) (N-acylethanolamine hydrolase ASAH1) (EC 3.5.1.-) (N-acylsphingosine amidohydrolase) [Cleaved into: Acid ceramidase subunit alpha; Acid ceramidase subunit beta]	2.46786	0.611589	1.55033	Q9WV54
P70315	Combo-Control	0.610824	0.124645	4.90052	36	2.04e-05	0.00116285	NA	0.12	0	4.69135	Was Wasp	WASP_MOUSE	Wiskott-Aldrich syndrome protein homolog (WASp)	4.69135	0.610824	2.93448	P70315
Q07968	Combo-Control	0.607225	0.169198	3.58884	36	0.000981326	0.0125321	NA	0.35	0	3.00819	F13b Cf13b	F13B_MOUSE	Coagulation factor XIII B chain (Protein-glutamine gamma-glutamyltransferase B chain) (Transglutaminase B chain)	3.00819	0.607225	1.90198	Q07968
P15119	Combo-Control	0.606709	0.438868	1.38244	13	0.190126	0.356138	NA	0.65	0	0.720958	Mcpt2	MCPT2_MOUSE	Mast cell protease 2 (mMCP-2) (EC 3.4.21.-)	0.720958	0.606709	0.448382	P15119
Q61152	Combo-Control	0.605731	0.156426	3.87233	35	0.000450932	0.00795913	NA	0.05	0	3.34589	Ptpn18 Flp1 Ptpk1	PTN18_MOUSE	Tyrosine-protein phosphatase non-receptor type 18 (EC 3.1.3.48) (Fetal liver phosphatase 1) (FLP-1) (PTP-K1)	3.34589	0.605731	2.09913	Q61152
P97371	Combo-Control	0.603109	0.27183	2.2187	36	0.0329002	0.11614	NA	0.907407	0	1.4828	Psme1	PSME1_MOUSE	Proteasome activator complex subunit 1 (11S regulator complex subunit alpha) (REG-alpha) (Activator of multicatalytic protease subunit 1) (Proteasome activator 28 subunit alpha) (PA28a) (PA28alpha)	1.4828	0.603109	0.935016	P97371
Q05117	Combo-Control	0.603096	0.456406	1.3214	17	0.203877	0.373044	NA	0.65	0	0.690632	Acp5 T5ap Trap	PPA5_MOUSE	Tartrate-resistant acid phosphatase type 5 (TR-AP) (EC 3.1.3.2) (Tartrate-resistant acid ATPase) (TrATPase) (Type 5 acid phosphatase)	0.690632	0.603096	0.42824	Q05117
Q9ERD8	Combo-Control	0.602532	0.272363	2.21223	34	0.0337702	0.117681	NA	0.05	0	1.47147	Parvg	PARVG_MOUSE	Gamma-parvin	1.47147	0.602532	0.929295	Q9ERD8
Q9QWK4	Combo-Control	0.601375	0.313091	1.92077	22	0.0678147	0.181246	NA	0.55	0	1.16868	Cd5l Aim Api6	CD5L_MOUSE	CD5 antigen-like (Apoptosis inhibitor expressed by macrophages) (mAIM) (Apoptosis inhibitory 6) (SP-alpha)	1.16868	0.601375	0.741731	Q9QWK4
A2AUC9	Combo-Control	0.599426	0.432594	1.38565	25	0.178091	0.342914	NA	0.567647	0	0.749358	Klhl41 Kbtbd10	KLH41_MOUSE	Kelch-like protein 41 (Kelch repeat and BTB domain-containing protein 10)	0.749358	0.599426	0.464815	A2AUC9
Q6PIE5	Combo-Control	0.598221	0.373686	1.60087	34	0.118659	0.261398	NA	0.4	0	0.925701	Atp1a2	AT1A2_MOUSE	Sodium/potassium-transporting ATPase subunit alpha-2 (Na(+)/K(+) ATPase alpha-2 subunit) (EC 7.2.2.13) (Na(+)/K(+) ATPase alpha(+) subunit) (Sodium pump subunit alpha-2)	0.925701	0.598221	0.582697	Q6PIE5
P10605	Combo-Control	0.593516	0.19309	3.07379	36	0.00401617	0.0310842	NA	0.876543	0	2.39619	Ctsb	CATB_MOUSE	Cathepsin B (EC 3.4.22.1) (Cathepsin B1) [Cleaved into: Cathepsin B light chain; Cathepsin B heavy chain]	2.39619	0.593516	1.50746	P10605
Q8VDG5	Combo-Control	0.592928	0.933569	0.635119	7	0.545543	0.705194	NA	0.875	0	0.263171	Ppcs Coab	PPCS_MOUSE	Phosphopantothenate--cysteine ligase (EC 6.3.2.51) (Phosphopantothenoylcysteine synthetase) (PPC synthetase)	0.263171	0.592928	0.151691	Q8VDG5
P21550	Combo-Control	0.592745	0.496259	1.19443	36	0.240122	0.41671	NA	0.923077	0	0.619569	Eno3 Eno-3	ENOB_MOUSE	Beta-enolase (EC 4.2.1.11) (2-phospho-D-glycerate hydro-lyase) (Enolase 3) (Muscle-specific enolase) (MSE) (Skeletal muscle enolase)	0.619569	0.592745	0.380166	P21550
P18181	Combo-Control	0.59231	0.131741	4.496	36	6.93e-05	0.00249381	NA	0	0	4.15937	Cd48 Bcm-1	CD48_MOUSE	CD48 antigen (BCM1 surface antigen) (BLAST-1) (HM48-1) (MRC OX-45 surface antigen) (SLAM family member 2) (SLAMF2) (Signaling lymphocytic activation molecule 2) (sgp-60) (CD antigen CD48)	4.15937	0.59231	2.60314	P18181
Q8BV66	Combo-Control	0.591682	0.144695	4.08918	36	0.000232201	0.00542052	NA	0.772727	0	3.63414	Ifi44 Mtap44	IFI44_MOUSE	Interferon-induced protein 44 (Microtubule-associated protein 44)	3.63414	0.591682	2.26596	Q8BV66
Q9QWR8	Combo-Control	0.591418	0.137059	4.31506	36	0.000119042	0.003692	NA	0.751282	0	3.9243	Naga	NAGAB_MOUSE	Alpha-N-acetylgalactosaminidase (EC 3.2.1.49) (Alpha-galactosidase B)	3.9243	0.591418	2.43274	Q9QWR8
E9QAM5	Combo-Control	0.58975	0.275855	2.1379	9	0.0612298	0.170879	NA	0.6	0	1.21304	Helz2	HELZ2_MOUSE	Helicase with zinc finger domain 2 (EC 3.6.4.-) (PPAR-gamma DNA-binding domain-interacting protein 1) (PDIP1) (PPAR-gamma DBD-interacting protein 1)	1.21304	0.58975	0.767312	E9QAM5
Q09200	Combo-Control	0.589315	0.372944	1.58017	14	0.13639	0.288459	NA	0.6	0	0.865216	B4galnt1 Galgt Galgt1 Ggm2	B4GN1_MOUSE	Beta-1,4 N-acetylgalactosaminyltransferase 1 (EC 2.4.1.92) ((N-acetylneuraminyl)-galactosylglucosylceramide) (GM2/GD2 synthase) (GalNAc-T)	0.865216	0.589315	0.539915	Q09200
Q91VS7	Combo-Control	0.589034	0.217657	2.70625	36	0.0103358	0.0551326	NA	0.34	0	1.98566	Mgst1	MGST1_MOUSE	Microsomal glutathione S-transferase 1 (Microsomal GST-1) (EC 2.5.1.18) (Microsomal GST-I)	1.98566	0.589034	1.25859	Q91VS7
P51885	Combo-Control	0.587561	0.182593	3.21787	36	0.00273241	0.0245711	NA	0.817593	0	2.56345	Lum Lcn Ldc	LUM_MOUSE	Lumican (Keratan sulfate proteoglycan lumican) (KSPG lumican)	2.56345	0.587561	1.60957	P51885
P52624	Combo-Control	0.584821	0.146978	3.97896	36	0.000320563	0.00662802	NA	0.756098	0	3.49409	Upp1 Up Upp	UPP1_MOUSE	Uridine phosphorylase 1 (UPase 1) (UrdPase 1) (EC 2.4.2.3)	3.49409	0.584821	2.17862	P52624
Q9EPQ7	Combo-Control	0.581004	0.155201	3.74357	35	0.00065096	0.00970992	NA	0.05	0	3.18645	Stard5	STAR5_MOUSE	StAR-related lipid transfer protein 5 (START domain-containing protein 5) (StARD5)	3.18645	0.581004	2.01278	Q9EPQ7
Q3UHK8	Combo-Control	0.580342	0.41558	1.39646	4	0.235081	0.411764	NA	0.8	0	0.628782	Tnrc6a Kiaa1460	TNR6A_MOUSE	Trinucleotide repeat-containing gene 6A protein	0.628782	0.580342	0.385352	Q3UHK8
Q64345	Combo-Control	0.578924	0.113017	5.12246	36	1.03e-05	0.000771498	NA	0.666667	0	4.98596	Ifit3 Garg49 Ifi49 Isg49	IFIT3_MOUSE	Interferon-induced protein with tetratricopeptide repeats 3 (IFIT-3) (Glucocorticoid-attenuated response gene 49 protein) (GARG-49) (P49) (IRG2)	4.98596	0.578924	3.11267	Q64345
Q61292	Combo-Control	0.574935	0.174222	3.30002	36	0.00218641	0.0214248	NA	0.79	0	2.66027	Lamb2 Lams	LAMB2_MOUSE	Laminin subunit beta-2 (Laminin-11 subunit beta) (Laminin-14 subunit beta) (Laminin-15 subunit beta) (Laminin-3 subunit beta) (Laminin-4 subunit beta) (Laminin-7 subunit beta) (Laminin-9 subunit beta) (S-laminin subunit beta) (S-LAM beta)	2.66027	0.574935	1.66908	Q61292
P28653	Combo-Control	0.574074	0.18522	3.09941	36	0.00375237	0.0298403	NA	0.903846	0	2.42569	Bgn	PGS1_MOUSE	Biglycan (Bone/cartilage proteoglycan I) (PG-S1)	2.42569	0.574074	1.5252	P28653
P16675	Combo-Control	0.573202	0.137177	4.17857	36	0.00017845	0.00452268	NA	0.795918	0	3.74848	Ctsa Ppgb	PPGB_MOUSE	Lysosomal protective protein (EC 3.4.16.5) (Carboxypeptidase C) (Carboxypeptidase L) (Cathepsin A) (Protective protein cathepsin A) (PPCA) (Protective protein for beta-galactosidase) [Cleaved into: Lysosomal protective protein 32 kDa chain; Lysosomal protective protein 20 kDa chain]	3.74848	0.573202	2.3446	P16675
P21981	Combo-Control	0.573029	0.152136	3.76657	36	0.000592237	0.00923153	NA	0.949495	0	3.2275	Tgm2	TGM2_MOUSE	Protein-glutamine gamma-glutamyltransferase 2 (EC 2.3.2.13) (Tissue transglutaminase) (Transglutaminase C) (TG(C)) (TGC) (TGase C) (Transglutaminase-2) (TGase-2)	3.2275	0.573029	2.03473	P21981
P01029	Combo-Control	0.570316	0.150723	3.78388	36	0.000563571	0.00916806	NA	0.864085	0	3.24905	C4b C4	CO4B_MOUSE	Complement C4-B [Cleaved into: Complement C4 beta chain; Complement C4 alpha chain; C4a anaphylatoxin; Complement C4 gamma chain]	3.24905	0.570316	2.03772	P01029
Q64516	Combo-Control	0.567388	0.182573	3.10774	36	0.00367027	0.0294028	NA	0.663158	0	2.4353	Gk Gyk	GLPK_MOUSE	Glycerol kinase (GK) (Glycerokinase) (EC 2.7.1.30) (ATP:glycerol 3-phosphotransferase)	2.4353	0.567388	1.53161	Q64516
Q61233	Combo-Control	0.565651	0.151215	3.74069	36	0.000637759	0.00970992	NA	0.953052	0	3.19534	Lcp1 Pls2	PLSL_MOUSE	Plastin-2 (65 kDa macrophage protein) (L-plastin) (Lymphocyte cytosolic protein 1) (LCP-1) (pp65)	3.19534	0.565651	2.01278	Q61233
Q8K124	Combo-Control	0.565284	0.106247	5.32048	36	5.63e-06	0.000581571	NA	0.698148	0	5.24984	Plekho2 Plekhq1	PKHO2_MOUSE	Pleckstrin homology domain-containing family O member 2 (PH domain-containing family O member 2) (Pleckstrin homology domain-containing family Q member 1) (PH domain-containing family Q member 1)	5.24984	0.565284	3.2354	Q8K124
Q9QZJ6	Combo-Control	0.562203	0.200091	2.80973	36	0.00796648	0.0465551	NA	0.140909	0	2.09873	Mfap5 Magp2	MFAP5_MOUSE	Microfibrillar-associated protein 5 (MFAP-5) (Microfibril-associated glycoprotein 2) (MAGP-2)	2.09873	0.562203	1.33203	Q9QZJ6
P32921	Combo-Control	0.559876	0.113082	4.95106	36	1.74e-05	0.00102376	NA	0.887356	0	4.7583	Wars1 Wars Wrs	SYWC_MOUSE	Tryptophan--tRNA ligase, cytoplasmic (EC 6.1.1.2) (Tryptophanyl-tRNA synthetase) (TrpRS) [Cleaved into: T1-TrpRS; T2-TrpRS]	4.7583	0.559876	2.9898	P32921
P11835	Combo-Control	0.558792	0.0835883	6.68505	36	8.53e-08	0.000123471	NA	0.923664	0	7.069	Itgb2	ITB2_MOUSE	Integrin beta-2 (Cell surface adhesion glycoproteins LFA-1/CR3/p150,95 subunit beta) (Complement receptor C3 subunit beta) (CD antigen CD18)	7.069	0.558792	3.90843	P11835
P62046	Combo-Control	0.557495	0.205065	2.71862	26	0.0115179	0.0593952	NA	0.69375	0	1.93863	Lrch1 Chdc1 Kiaa1016	LRCH1_MOUSE	Leucine-rich repeat and calponin homology domain-containing protein 1 (Calponin homology domain-containing protein 1)	1.93863	0.557495	1.22625	P62046
P01723	Combo-Control	0.556879	0.172691	3.22471	36	0.00268237	0.0242643	NA	0	0	2.57148	NA	NA	NA	2.57148	0.556879	1.61503	P01723;P01726;P01727;P01728;P01729
P55002	Combo-Control	0.556735	0.181412	3.06889	36	0.00406852	0.0312346	NA	0.166667	0	2.39056	Mfap2 Magp Magp1	MFAP2_MOUSE	Microfibrillar-associated protein 2 (MFAP-2) (Microfibril-associated glycoprotein 1) (MAGP) (MAGP-1)	2.39056	0.556735	1.50536	P55002
P08121	Combo-Control	0.554767	0.154444	3.59204	36	0.000972529	0.0124564	NA	0.75	0	3.0121	Col3a1	CO3A1_MOUSE	Collagen alpha-1(III) chain	3.0121	0.554767	1.90461	P08121
P08226	Combo-Control	0.554521	0.182265	3.04239	36	0.00436328	0.0325825	NA	0.72973	0	2.36019	Apoe	APOE_MOUSE	Apolipoprotein E (Apo-E)	2.36019	0.554521	1.48702	P08226
Q9QY81	Combo-Control	0.553463	0.159737	3.46483	34	0.00145478	0.0163592	NA	0.3	0	2.8372	Nup210 Kiaa0906	PO210_MOUSE	Nuclear pore membrane glycoprotein 210 (Nuclear pore protein gp210) (Nuclear envelope pore membrane protein POM 210) (POM210) (Nucleoporin Nup210) (Pore membrane protein of 210 kDa)	2.8372	0.553463	1.78624	Q9QY81
Q9WTR5	Combo-Control	0.552412	0.286464	1.92838	35	0.0619509	0.171879	NA	0.05	0	1.20795	Cdh13	CAD13_MOUSE	Cadherin-13 (Heart cadherin) (H-cadherin) (Truncated cadherin) (T-cad) (T-cadherin)	1.20795	0.552412	0.764777	Q9WTR5
Q9WVL2	Combo-Control	0.551881	0.152661	3.61507	36	0.00091134	0.0120186	NA	0.701667	0	3.04032	Stat2	STAT2_MOUSE	Signal transducer and activator of transcription 2	3.04032	0.551881	1.92015	Q9WVL2
Q8VCS0	Combo-Control	0.551581	0.200092	2.75665	36	0.00911034	0.05091	NA	0.4	0	2.04047	Pglyrp2 Pglyrpl Pgrpl	PGRP2_MOUSE	N-acetylmuramoyl-L-alanine amidase (EC 3.5.1.28) (Peptidoglycan recognition protein 2) (Peptidoglycan recognition protein long) (PGRP-L) (TagL)	2.04047	0.551581	1.2932	Q8VCS0
P19123	Combo-Control	0.551207	0.419753	1.31317	23	0.202077	0.371278	NA	0.23	0	0.694483	Tnnc1 Tncc	TNNC1_MOUSE	Troponin C, slow skeletal and cardiac muscles (TN-C)	0.694483	0.551207	0.430301	P19123
Q8C2K1	Combo-Control	0.549676	0.214165	2.5666	2	0.124157	0.269275	NA	0.85	0	0.90603	Def6 Ibp Slat	DEFI6_MOUSE	Differentially expressed in FDCP 6 (DEF-6) (IRF4-binding protein) (SWAP-70-like adapter of T-cells)	0.90603	0.549676	0.569805	Q8C2K1
P21958	Combo-Control	0.549047	0.14015	3.91757	36	0.000383205	0.00723425	NA	0.873418	0	3.41657	Tap1 Abcb2 Ham-1 Ham1	TAP1_MOUSE	Antigen peptide transporter 1 (APT1) (ATP-binding cassette sub-family B member 2) (Histocompatibility antigen modifier 1) (Peptide transporter TAP1)	3.41657	0.549047	2.14061	P21958
P23492	Combo-Control	0.549042	0.178451	3.07671	36	0.00398524	0.0309939	NA	0.884302	0	2.39955	Pnp Np Pnp1	PNPH_MOUSE	Purine nucleoside phosphorylase (PNP) (EC 2.4.2.1) (Inosine phosphorylase) (Inosine-guanosine phosphorylase)	2.39955	0.549042	1.50872	P23492
O35114	Combo-Control	0.548876	0.140343	3.91095	36	0.000390633	0.00729742	NA	0	0	3.40823	Scarb2	SCRB2_MOUSE	Lysosome membrane protein 2 (85 kDa lysosomal membrane sialoglycoprotein) (LGP85) (Lysosome membrane protein II) (LIMP II) (Scavenger receptor class B member 2)	3.40823	0.548876	2.13683	O35114
Q8CD10	Combo-Control	0.546426	0.342645	1.59473	14	0.133093	0.283557	NA	0.8	0	0.875845	Micu2 Efha1	MICU2_MOUSE	Calcium uptake protein 2, mitochondrial (EF-hand domain-containing family member A1)	0.875845	0.546426	0.547359	Q8CD10
Q5DTY9	Combo-Control	0.545073	0.141078	3.86364	36	0.000447945	0.00793868	NA	0.0428571	0	3.34878	Kctd16 Gm1267 Kiaa1317	KCD16_MOUSE	BTB/POZ domain-containing protein KCTD16	3.34878	0.545073	2.10025	Q5DTY9
P10810	Combo-Control	0.541567	0.137738	3.93187	36	0.000367628	0.00705293	NA	0.552381	0	3.43459	Cd14	CD14_MOUSE	Monocyte differentiation antigen CD14 (Myeloid cell-specific leucine-rich glycoprotein) (CD antigen CD14)	3.43459	0.541567	2.15163	P10810
P33622	Combo-Control	0.540671	0.198901	2.7183	36	0.0100298	0.0540984	NA	0.25	0	1.99871	Apoc3	APOC3_MOUSE	Apolipoprotein C-III (Apo-CIII) (ApoC-III) (Apolipoprotein C3)	1.99871	0.540671	1.26682	P33622
Q9ES52	Combo-Control	0.537879	0.133391	4.03234	36	0.000274295	0.00607647	NA	0.457143	0	3.56178	Inpp5d 7a33 Ship Ship1	SHIP1_MOUSE	Phosphatidylinositol 3,4,5-trisphosphate 5-phosphatase 1 (EC 3.1.3.86) (Inositol polyphosphate-5-phosphatase D) (EC 3.1.3.56) (Inositol polyphosphate-5-phosphatase of 145 kDa) (SIP-145) (Phosphatidylinositol-4,5-bisphosphate 5-phosphatase) (EC 3.1.3.36) (SH2 domain-containing inositol 5'-phosphatase 1) (SH2 domain-containing inositol phosphatase 1) (SHIP-1) (p150Ship)	3.56178	0.537879	2.21635	Q9ES52
C0HKG5	Combo-Control	0.536616	0.119381	4.49498	36	6.95e-05	0.00249381	NA	0.165	0	4.15804	NA	NA	NA	4.15804	0.536616	2.60314	C0HKG5;C0HKG6
Q3UJU9	Combo-Control	0.53432	0.110312	4.84371	36	2.42e-05	0.00125085	NA	0.316667	0	4.61621	Rmdn3 Fam82a2 Fam82c	RMD3_MOUSE	Regulator of microtubule dynamics protein 3 (RMD-3) (mRMD-3) (Protein FAM82A2) (Protein FAM82C)	4.61621	0.53432	2.9028	Q3UJU9
P07361	Combo-Control	0.534257	0.395852	1.34964	36	0.185559	0.35034	NA	0	0	0.731519	Orm2 Agp-2 Orm-2	A1AG2_MOUSE	Alpha-1-acid glycoprotein 2 (AGP 2) (Orosomucoid-2) (OMD 2)	0.731519	0.534257	0.45551	P07361
P60824	Combo-Control	0.534034	0.203386	2.62572	34	0.0128671	0.0634874	NA	0.1	0	1.89052	Cirbp Cirp	CIRBP_MOUSE	Cold-inducible RNA-binding protein (A18 hnRNP) (Glycine-rich RNA-binding protein CIRP)	1.89052	0.534034	1.19731	P60824
Q4QRL3	Combo-Control	0.533666	0.169893	3.14119	35	0.00341419	0.028163	NA	0.416667	0	2.46671	Ccdc88b Ccdc88	CC88B_MOUSE	Coiled-coil domain-containing protein 88B (Gipie) (Hook-related protein 3) (HkRP3)	2.46671	0.533666	1.55032	Q4QRL3
Q8C3X2	Combo-Control	0.533284	0.34106	1.56361	16	0.13747	0.289983	NA	0.55	0	0.861791	Ccdc90b	CC90B_MOUSE	Coiled-coil domain-containing protein 90B, mitochondrial	0.861791	0.533284	0.537627	Q8C3X2
Q6WVG3	Combo-Control	0.532216	0.148862	3.57522	36	0.00101968	0.0126903	NA	0.673333	0	2.99154	Kctd12 Pfet1	KCD12_MOUSE	BTB/POZ domain-containing protein KCTD12 (Pfetin) (Predominantly fetal expressed T1 domain)	2.99154	0.532216	1.89653	Q6WVG3
Q9R062	Combo-Control	0.530566	0.169676	3.12694	36	0.00348734	0.0285699	NA	0.242308	0	2.45751	Gyg1 Gyg	GLYG_MOUSE	Glycogenin-1 (GN-1) (GN1) (EC 2.4.1.186)	2.45751	0.530566	1.54409	Q9R062
Q3UP87	Combo-Control	0.530357	0.139394	3.80472	36	0.000530824	0.00889899	NA	0.5	0	3.27505	Elane Ela2	ELNE_MOUSE	Neutrophil elastase (EC 3.4.21.37) (Elastase-2) (Leukocyte elastase)	3.27505	0.530357	2.05066	Q3UP87
Q9JLI6	Combo-Control	0.529765	0.173902	3.04634	36	0.00431812	0.0323822	NA	0.6625	0	2.36471	Scly Scl	SCLY_MOUSE	Selenocysteine lyase (mSCL) (EC 4.4.1.16)	2.36471	0.529765	1.48969	Q9JLI6
Q8BYW1	Combo-Control	0.529004	0.117053	4.51937	36	6.46e-05	0.00237645	NA	0.354167	0	4.18988	Arhgap25 Kiaa0053	RHG25_MOUSE	Rho GTPase-activating protein 25 (Rho-type GTPase-activating protein 25)	4.18988	0.529004	2.62407	Q8BYW1
Q7TQ62	Combo-Control	0.528133	0.494332	1.06838	21	0.297479	0.477203	NA	0.683333	0	0.526544	Podn	PODN_MOUSE	Podocan	0.526544	0.528133	0.321297	Q7TQ62
Q99MQ4	Combo-Control	0.526677	0.270499	1.94705	36	0.0593624	0.167046	NA	0.748611	0	1.22649	Aspn	ASPN_MOUSE	Asporin (Periodontal ligament-associated protein 1) (PLAP-1)	1.22649	0.526677	0.777165	Q99MQ4
P29351	Combo-Control	0.526185	0.130993	4.01689	36	0.000286974	0.0062082	NA	0.9125	0	3.54216	Ptpn6 Hcp Hcph Ptp1C	PTN6_MOUSE	Tyrosine-protein phosphatase non-receptor type 6 (EC 3.1.3.48) (70Z-SHP) (Hematopoietic cell protein-tyrosine phosphatase) (PTPTY-42) (Protein-tyrosine phosphatase 1C) (PTP-1C) (SH-PTP1) (SHP-1)	3.54216	0.526185	2.20703	P29351
Q9CZE3	Combo-Control	0.525226	0.16396	3.20338	36	0.00284123	0.025384	NA	0.366667	0	2.54649	Rab32	RAB32_MOUSE	Ras-related protein Rab-32	2.54649	0.525226	1.59544	Q9CZE3
Q5NBU8	Combo-Control	0.52315	0.0954327	5.48188	36	3.42e-06	0.000450589	NA	0	0	5.4654	Xaf1 Birc4bp Xiapaf1	XAF1_MOUSE	XIAP-associated factor 1 (BIRC4-binding protein)	5.4654	0.52315	3.34622	Q5NBU8
Q9BDB7	Combo-Control	0.522311	0.146269	3.5709	36	0.00103216	0.0128047	NA	0.728788	0	2.98625	Ifi44l H28	IF44L_MOUSE	Interferon-induced protein 44-like [Cleaved into: Minor histocompatibility antigen HA-28 (HLA-HA28) (IFL8)]	2.98625	0.522311	1.89263	Q9BDB7
P62631	Combo-Control	0.521807	0.625425	0.834324	23	0.41268	0.590398	NA	0.233333	0	0.384386	Eef1a2 Eef1al Stn	EF1A2_MOUSE	Elongation factor 1-alpha 2 (EF-1-alpha-2) (Eukaryotic elongation factor 1 A-2) (eEF1A-2) (Statin-S1)	0.384386	0.521807	0.228855	P62631
Q6VN19	Combo-Control	0.521519	0.316368	1.64846	17	0.117614	0.260526	NA	0.45	0	0.92954	Ranbp10 Kiaa1464	RBP10_MOUSE	Ran-binding protein 10 (RanBP10)	0.92954	0.521519	0.584149	Q6VN19
Q64314	Combo-Control	0.521256	0.24069	2.16568	33	0.0376622	0.125406	NA	0.15	0	1.42409	Cd34	CD34_MOUSE	Hematopoietic progenitor cell antigen CD34 (CD antigen CD34)	1.42409	0.521256	0.901682	Q64314
Q5EBG6	Combo-Control	0.520461	0.501218	1.03839	24	0.309437	0.488928	NA	0.225	0	0.509428	Hspb6 Gm479	HSPB6_MOUSE	Heat shock protein beta-6 (HspB6)	0.509428	0.520461	0.310755	Q5EBG6
O54824	Combo-Control	0.519676	0.149679	3.47193	36	0.00136143	0.0154746	NA	0.4375	0	2.86601	Il16	IL16_MOUSE	Pro-interleukin-16 [Cleaved into: Interleukin-16 (IL-16) (Lymphocyte chemoattractant factor) (LCF)]	2.86601	0.519676	1.81038	O54824
Q9R111	Combo-Control	0.519457	0.140187	3.70546	36	0.000705205	0.0102067	NA	0.846154	0	3.15168	Gda	GUAD_MOUSE	Guanine deaminase (Guanase) (Guanine aminase) (EC 3.5.4.3) (Guanine aminohydrolase) (GAH)	3.15168	0.519457	1.99112	Q9R111
Q99JY3	Combo-Control	0.51833	0.154959	3.34494	36	0.00193363	0.0201618	NA	0.346667	0	2.71363	Gimap4 Ian1 Imap4	GIMA4_MOUSE	GTPase IMAP family member 4 (Immunity-associated nucleotide 1 protein) (IAN-1) (Immunity-associated protein 4)	2.71363	0.51833	1.69547	Q99JY3
Q8K2L8	Combo-Control	0.516201	0.235057	2.19607	5	0.0794861	0.200656	NA	0.7	0	1.09971	Trappc12 Ttc15	TPC12_MOUSE	Trafficking protein particle complex subunit 12 (Tetratricopeptide repeat protein 15) (TPR repeat protein 15)	1.09971	0.516201	0.697547	Q8K2L8
Q99KP3	Combo-Control	0.5161	0.211108	2.44473	27	0.0213052	0.0875187	NA	0.45	0	1.67151	Cryl1 Cry	CRYL1_MOUSE	Lambda-crystallin homolog (EC 1.1.1.45) (L-gulonate 3-dehydrogenase) (Gul3DH)	1.67151	0.5161	1.0579	Q99KP3
O88522	Combo-Control	0.515529	0.139507	3.69537	32	0.000817288	0.0112656	NA	0.555556	0	3.08762	Ikbkg Nemo	NEMO_MOUSE	NF-kappa-B essential modulator (NEMO) (IkB kinase-associated protein 1) (IKKAP1) (mFIP-3) (Inhibitor of nuclear factor kappa-B kinase subunit gamma) (I-kappa-B kinase subunit gamma) (IKK-gamma) (IKKG) (IkB kinase subunit gamma) (NF-kappa-B essential modifier)	3.08762	0.515529	1.94825	O88522
Q9Z0E6	Combo-Control	0.514778	0.203005	2.53579	36	0.0157029	0.0718272	NA	0.953052	0	1.80402	Gbp2	GBP2_MOUSE	Guanylate-binding protein 2 (EC 3.6.5.-) (GTP-binding protein 2) (GBP-2) (mGBP-2) (mGBP2) (Guanine nucleotide-binding protein 2) (Interferon-induced guanylate-binding protein 2)	1.80402	0.514778	1.14371	Q9Z0E6
P01863	Combo-Control	0.514469	0.284326	1.80943	36	0.0787403	0.199353	NA	0.53	0	1.1038	NA	NA	NA	1.1038	0.514469	0.700377	P01863;P01865
P08122	Combo-Control	0.512541	0.176543	2.9032	36	0.00627181	0.0401998	NA	0.74359	0	2.20261	Col4a2	CO4A2_MOUSE	Collagen alpha-2(IV) chain [Cleaved into: Canstatin]	2.20261	0.512541	1.39578	P08122
Q02788	Combo-Control	0.511717	0.160193	3.19439	36	0.00291091	0.0256894	NA	0.929577	0	2.53597	Col6a2	CO6A2_MOUSE	Collagen alpha-2(VI) chain	2.53597	0.511717	1.59025	Q02788
Q8BW75	Combo-Control	0.510489	0.252047	2.02537	34	0.0507366	0.150683	NA	0.05	0	1.29468	Maob	AOFB_MOUSE	Amine oxidase [flavin-containing] B (EC 1.4.3.4) (Monoamine oxidase type B) (MAO-B)	1.29468	0.510489	0.821936	Q8BW75
P35492	Combo-Control	0.509164	0.226787	2.24512	36	0.0309964	0.111597	NA	0.74697	0	1.50869	Hal Hsd Huth	HUTH_MOUSE	Histidine ammonia-lyase (Histidase) (EC 4.3.1.3)	1.50869	0.509164	0.952346	P35492
P15105	Combo-Control	0.508599	0.223786	2.2727	36	0.0291144	0.106769	NA	0.775758	0	1.53589	Glul Glns	GLNA_MOUSE	Glutamine synthetase (GS) (EC 6.3.1.2) (Glutamate--ammonia ligase) (Palmitoyltransferase GLUL) (EC 2.3.1.225)	1.53589	0.508599	0.971554	P15105
Q8VI93	Combo-Control	0.507815	0.147794	3.43597	36	0.00150442	0.0167064	NA	0.854098	0	2.82263	Oas3 oasl10	OAS3_MOUSE	2'-5'-oligoadenylate synthase 3 ((2-5')oligo(A) synthase 3) (2-5A synthase 3) (EC 2.7.7.84) (2',5'-oligoadenylate synthetase-like 10)	2.82263	0.507815	1.77712	Q8VI93
Q8JZV7	Combo-Control	0.507731	0.112614	4.50861	36	6.67e-05	0.002434	NA	0.696	0	4.17582	Amdhd2	NAGA_MOUSE	N-acetylglucosamine-6-phosphate deacetylase (GlcNAc 6-P deacetylase) (EC 3.5.1.25) (Amidohydrolase domain-containing protein 2)	4.17582	0.507731	2.61368	Q8JZV7
P06800	Combo-Control	0.501785	0.0979683	5.12191	36	1.03e-05	0.000771498	NA	0.889444	0	4.98523	Ptprc Ly-5	PTPRC_MOUSE	Receptor-type tyrosine-protein phosphatase C (EC 3.1.3.48) (Leukocyte common antigen) (L-CA) (Lymphocyte antigen 5) (Ly-5) (T200) (CD antigen CD45)	4.98523	0.501785	3.11267	P06800
Q99JY8	Combo-Control	0.500964	0.382997	1.30801	13	0.213527	0.384557	NA	0.7	0	0.670548	Plpp3 Lpp3 Ppap2b	PLPP3_MOUSE	Phospholipid phosphatase 3 (EC 3.1.3.-) (EC 3.1.3.4) (Lipid phosphate phosphohydrolase 3) (PAP2-beta) (Phosphatidate phosphohydrolase type 2b) (Phosphatidic acid phosphatase 2b) (PAP-2b) (PAP2b)	0.670548	0.500964	0.41504	Q99JY8
P55772	Combo-Control	0.500853	0.140094	3.57511	36	0.00102002	0.0126903	NA	0	0	2.99139	Entpd1 Cd39	ENTP1_MOUSE	Ectonucleoside triphosphate diphosphohydrolase 1 (NTPDase 1) (EC 3.6.1.5) (Ecto-ATP diphosphohydrolase 1) (Ecto-ATPDase 1) (Ecto-ATPase 1) (Ecto-apyrase) (Lymphoid cell activation antigen) (CD antigen CD39)	2.99139	0.500853	1.89653	P55772
P19973	Combo-Control	0.500726	0.106122	4.71839	36	3.54e-05	0.00167113	NA	0.815625	0	4.45089	Lsp1 Pp52 S37 Wp34	LSP1_MOUSE	Lymphocyte-specific protein 1 (52 kDa phosphoprotein) (pp52) (Lymphocyte-specific antigen WP34) (S37 protein)	4.45089	0.500726	2.77699	P19973
Q9D2V7	Combo-Control	0.500631	0.103614	4.83169	36	2.51e-05	0.00127789	NA	0.837705	0	4.60032	Coro7	CORO7_MOUSE	Coronin-7 (Crn7) (70 kDa WD repeat tumor rejection antigen homolog)	4.60032	0.500631	2.89351	Q9D2V7
Q8BYI6	Combo-Control	0.499691	0.150059	3.32997	36	0.00201461	0.0206307	NA	0.179167	0	2.69581	Lpcat2 Aytl1 Aytl1a Lpcat2a	PCAT2_MOUSE	Lysophosphatidylcholine acyltransferase 2 (LPC acyltransferase 2) (LPCAT-2) (LysoPC acyltransferase 2) (EC 2.3.1.23) (1-acylglycerol-3-phosphate O-acyltransferase 11) (1-AGP acyltransferase 11) (1-AGPAT 11) (EC 2.3.1.51) (1-acylglycerophosphocholine O-acyltransferase) (1-alkylglycerophosphocholine O-acetyltransferase) (EC 2.3.1.67) (Acetyl-CoA:lyso-platelet-activating factor acetyltransferase) (A…	2.69581	0.499691	1.68549	Q8BYI6
Q8K370	Combo-Control	0.498931	0.113956	4.37828	35	0.00010316	0.00331793	NA	0.15	0	3.98649	Acad10	ACD10_MOUSE	Acyl-CoA dehydrogenase family member 10 (ACAD-10) (EC 1.3.99.-)	3.98649	0.498931	2.47913	Q8K370
O70496	Combo-Control	0.498406	0.211485	2.35669	35	0.024164	0.0948644	NA	0	0	1.61683	Clcn7 Clc7	CLCN7_MOUSE	H(+)/Cl(-) exchange transporter 7 (Chloride channel 7 alpha subunit) (Chloride channel protein 7) (ClC-7)	1.61683	0.498406	1.0229	O70496
Q9D1H9	Combo-Control	0.498372	0.553765	0.89997	34	0.374467	0.555305	NA	0.475	0	0.426587	Mfap4	MFAP4_MOUSE	Microfibril-associated glycoprotein 4	0.426587	0.498372	0.255468	Q9D1H9
P08103	Combo-Control	0.49774	0.106153	4.68891	36	3.87e-05	0.00176957	NA	0.715625	0	4.4121	Hck	HCK_MOUSE	Tyrosine-protein kinase HCK (EC 2.7.10.2) (B-cell/myeloid kinase) (BMK) (Hematopoietic cell kinase) (Hemopoietic cell kinase) (p56-HCK/p59-HCK)	4.4121	0.49774	2.75213	P08103
O35215	Combo-Control	0.497608	0.0998641	4.98285	36	1.58e-05	0.000995031	NA	0.680645	0	4.80046	Ddt	DOPD_MOUSE	D-dopachrome decarboxylase (EC 4.1.1.84) (D-dopachrome tautomerase)	4.80046	0.497608	3.00216	O35215
P47968	Combo-Control	0.497298	0.133126	3.73554	36	0.000647214	0.00970992	NA	0.696	0	3.18895	Rpia Rpi	RPIA_MOUSE	Ribose-5-phosphate isomerase (EC 5.3.1.6) (Phosphoriboisomerase)	3.18895	0.497298	2.01278	P47968
Q8BFR4	Combo-Control	0.49704	0.117781	4.22004	36	0.00015785	0.00428879	NA	0	0	3.80176	Gns	GNS_MOUSE	N-acetylglucosamine-6-sulfatase (EC 3.1.6.14) (Glucosamine-6-sulfatase) (G6S)	3.80176	0.49704	2.36766	Q8BFR4
Q8K1I7	Combo-Control	0.496424	0.131513	3.7747	36	0.000578596	0.00917353	NA	0.286364	0	3.23762	Wipf1 Waspip Wip	WIPF1_MOUSE	WAS/WASL-interacting protein family member 1 (Wiskott-Aldrich syndrome protein-interacting protein) (WASP-interacting protein)	3.23762	0.496424	2.03746	Q8K1I7
O35448	Combo-Control	0.492099	0.389211	1.26435	25	0.217765	0.38895	NA	0.4	0	0.662011	Ppt2	PPT2_MOUSE	Lysosomal thioesterase PPT2 (PPT-2) (EC 3.1.2.-)	0.662011	0.492099	0.410106	O35448
Q99P30	Combo-Control	0.491962	0.181102	2.71649	35	0.0101836	0.0546565	NA	0.05	0	1.9921	Nudt7	NUDT7_MOUSE	Peroxisomal coenzyme A diphosphatase NUDT7 (EC 3.6.1.-) (Nucleoside diphosphate-linked moiety X motif 7) (Nudix motif 7)	1.9921	0.491962	1.26236	Q99P30
P51569	Combo-Control	0.491024	0.123772	3.96717	36	0.00033177	0.00673151	NA	0.320833	0	3.47916	Gla Ags	AGAL_MOUSE	Alpha-galactosidase A (EC 3.2.1.22) (Alpha-D-galactosidase A) (Alpha-D-galactoside galactohydrolase) (Melibiase)	3.47916	0.491024	2.17189	P51569
Q9QZL0	Combo-Control	0.490367	0.131167	3.7385	36	0.000641767	0.00970992	NA	0.465625	0	3.19262	Ripk3 Rip3	RIPK3_MOUSE	Receptor-interacting serine/threonine-protein kinase 3 (EC 2.7.11.1) (RIP-like protein kinase 3) (Receptor-interacting protein 3) (RIP-3) (mRIP3)	3.19262	0.490367	2.01278	Q9QZL0
Q9JKS4	Combo-Control	0.490135	0.589614	0.831282	24	0.414009	0.591714	NA	0.822857	0	0.38299	Ldb3 Kiaa0613	LDB3_MOUSE	LIM domain-binding protein 3 (Protein cypher) (Protein oracle) (Z-band alternatively spliced PDZ-motif protein)	0.38299	0.490135	0.227888	Q9JKS4
P01592	Combo-Control	0.488845	0.261503	1.86937	31	0.0710441	0.18684	NA	0.15	0	1.14847	Jchain Igj	IGJ_MOUSE	Immunoglobulin J chain	1.14847	0.488845	0.728529	P01592
Q6P9Q6	Combo-Control	0.48537	0.0963901	5.03547	36	1.35e-05	0.000886815	NA	0.608824	0	4.87031	Fkbp15 Fkbp133 Kiaa0674	FKB15_MOUSE	FK506-binding protein 15 (FKBP-15) (133 kDa FK506-binding protein) (133 kDa FKBP) (FKBP-133) (WASP and FKBP-like) (WAFL)	4.87031	0.48537	3.05217	Q6P9Q6
P50544	Combo-Control	0.483792	0.13375	3.61714	36	0.000906034	0.0120186	NA	0.79125	0	3.04286	Acadvl Vlcad	ACADV_MOUSE	Very long-chain specific acyl-CoA dehydrogenase, mitochondrial (EC 1.3.8.9) (MVLCAD) (VLCAD)	3.04286	0.483792	1.92015	P50544
P17047	Combo-Control	0.483399	0.0850888	5.68111	36	1.85e-06	0.000335339	NA	0.742857	0	5.73177	Lamp2 Lamp-2	LAMP2_MOUSE	Lysosome-associated membrane glycoprotein 2 (LAMP-2) (Lysosome-associated membrane protein 2) (CD107 antigen-like family member B) (Lysosomal membrane glycoprotein type B) (LGP-B) (CD antigen CD107b)	5.73177	0.483399	3.47452	P17047
Q8BY35	Combo-Control	0.481807	0.639195	0.753771	5	0.484948	0.655148	NA	0.925	0	0.314305	Fgd2	FGD2_MOUSE	FYVE, RhoGEF and PH domain-containing protein 2	0.314305	0.481807	0.183661	Q8BY35
Q3U962	Combo-Control	0.481687	0.349082	1.37987	36	0.176137	0.34036	NA	0	0	0.754149	Col5a2	CO5A2_MOUSE	Collagen alpha-2(V) chain	0.754149	0.481687	0.468062	Q3U962
Q8CHC4	Combo-Control	0.480284	0.199964	2.40185	33	0.0221011	0.0900216	NA	0.566667	0	1.65559	Synj1 Kiaa0910	SYNJ1_MOUSE	Synaptojanin-1 (EC 3.1.3.36) (Synaptic inositol 1,4,5-trisphosphate 5-phosphatase 1)	1.65559	0.480284	1.04565	Q8CHC4
P02463	Combo-Control	0.480264	0.176442	2.72194	36	0.00993877	0.0539427	NA	0.772727	0	2.00267	Col4a1	CO4A1_MOUSE	Collagen alpha-1(IV) chain [Cleaved into: Arresten]	2.00267	0.480264	1.26807	P02463
Q61107	Combo-Control	0.479905	0.162098	2.96059	36	0.00540544	0.0369496	NA	0.9212	0	2.26717	Gbp4 Gbp3	GBP4_MOUSE	Guanylate-binding protein 4 (EC 3.6.5.-) (GTP-binding protein 3) (GBP-3) (GTP-binding protein 4) (GBP-4) (Guanine nucleotide-binding protein 4) (Guanylate-binding protein 3)	2.26717	0.479905	1.43239	Q61107
P70248	Combo-Control	0.479033	0.135321	3.53996	36	0.00112582	0.0135786	NA	0.691071	0	2.94853	Myo1f	MYO1F_MOUSE	Unconventional myosin-If	2.94853	0.479033	1.86714	P70248
Q8K2T8	Combo-Control	0.477189	0.5881	0.811407	9	0.438064	0.61365	NA	0.875	0	0.358463	Paf1	PAF1_MOUSE	RNA polymerase II-associated factor 1 homolog	0.358463	0.477189	0.212079	Q8K2T8
Q8K4I3	Combo-Control	0.477113	0.122085	3.90803	36	0.000393959	0.00731013	NA	0.075	0	3.40455	Arhgef6	ARHG6_MOUSE	Rho guanine nucleotide exchange factor 6 (Alpha-PIX) (Rac/Cdc42 guanine nucleotide exchange factor 6)	3.40455	0.477113	2.13607	Q8K4I3
O35601	Combo-Control	0.475958	0.201049	2.36737	34	0.0237471	0.0941644	NA	0.688235	0	1.62439	Fyb1 Fyb	FYB1_MOUSE	FYN-binding protein 1 (Adhesion and degranulation promoting adaptor protein) (ADAP) (FYB-120/130) (p120/p130) (FYN-T-binding protein) (SLAP-130) (SLP-76-associated phosphoprotein)	1.62439	0.475958	1.02611	O35601
Q3U5Q7	Combo-Control	0.47565	0.115364	4.12303	36	0.000210204	0.005039	NA	0.758974	0	3.67736	Cmpk2 Tyki	CMPK2_MOUSE	UMP-CMP kinase 2, mitochondrial (EC 2.7.4.14) (Nucleoside-diphosphate kinase) (EC 2.7.4.6) (Thymidylate kinase LPS-inducible member) (TYKi)	3.67736	0.47565	2.29766	Q3U5Q7
P04117	Combo-Control	0.47522	0.275098	1.72746	36	0.0926572	0.222437	NA	0.84375	0	1.03312	Fabp4 Ap2	FABP4_MOUSE	Fatty acid-binding protein, adipocyte (3T3-L1 lipid-binding protein) (Adipocyte lipid-binding protein) (ALBP) (Adipocyte-type fatty acid-binding protein) (A-FABP) (AFABP) (Fatty acid-binding protein 4) (Myelin P2 protein homolog) (P15) (P2 adipocyte protein) (Protein 422)	1.03312	0.47522	0.652792	P04117
P13707	Combo-Control	0.473782	0.42458	1.11589	36	0.271864	0.450548	NA	0.805208	0	0.565648	Gpd1 Gdc-1 Gdc1 Kiaa4010	GPDA_MOUSE	Glycerol-3-phosphate dehydrogenase [NAD(+)], cytoplasmic (GPD-C) (GPDH-C) (EC 1.1.1.8)	0.565648	0.473782	0.346259	P13707
Q9D958	Combo-Control	0.473424	0.794478	0.595894	12	0.562318	0.718726	NA	0.74	0	0.250018	Spcs1 Spc12	SPCS1_MOUSE	Signal peptidase complex subunit 1 (EC 3.4.-.-) (Microsomal signal peptidase 12 kDa subunit) (SPase 12 kDa subunit)	0.250018	0.473424	0.143437	Q9D958
Q9JJX6	Combo-Control	0.473205	0.149774	3.15947	36	0.00319698	0.0274333	NA	0.166667	0	2.49526	P2rx4 P2x4	P2RX4_MOUSE	P2X purinoceptor 4 (P2X4) (ATP receptor) (Purinergic receptor)	2.49526	0.473205	1.56172	Q9JJX6
Q9R233	Combo-Control	0.473193	0.169548	2.79091	36	0.00835579	0.0482458	NA	0.885057	0	2.07801	Tapbp Tapa	TPSN_MOUSE	Tapasin (TPN) (TPSN) (TAP-associated protein) (TAP-binding protein)	2.07801	0.473193	1.31654	Q9R233
Q91X52	Combo-Control	0.472301	0.101196	4.66721	36	4.13e-05	0.00187002	NA	0.075	0	4.38357	Dcxr	DCXR_MOUSE	L-xylulose reductase (XR) (EC 1.1.1.10) (Dicarbonyl/L-xylulose reductase)	4.38357	0.472301	2.72815	Q91X52
O89053	Combo-Control	0.471677	0.0949055	4.96997	36	1.65e-05	0.00100491	NA	0.923077	0	4.78338	Coro1a Coro1	COR1A_MOUSE	Coronin-1A (Coronin-like protein A) (Clipin-A) (Coronin-like protein p57) (Tryptophan aspartate-containing coat protein) (TACO)	4.78338	0.471677	2.99787	O89053
Q9WTP7	Combo-Control	0.471669	0.110929	4.25199	36	0.000143588	0.00407396	NA	0.673333	0	3.84288	Ak3 Ak3l Ak3l1 Akl3l	KAD3_MOUSE	GTP:AMP phosphotransferase AK3, mitochondrial (EC 2.7.4.10) (Adenylate kinase 3) (AK 3) (Adenylate kinase 3 alpha-like 1)	3.84288	0.471669	2.38998	Q9WTP7
D0QMC3	Combo-Control	0.471227	0.127589	3.69331	33	0.000796197	0.0111791	NA	0.5	0	3.09898	Mndal	MNDAL_MOUSE	Myeloid cell nuclear differentiation antigen-like protein	3.09898	0.471227	1.9516	D0QMC3
P52196	Combo-Control	0.469993	0.236978	1.98327	35	0.0552263	0.159649	NA	0.05	0	1.25785	Tst	THTR_MOUSE	Thiosulfate sulfurtransferase (EC 2.8.1.1) (Rhodanese)	1.25785	0.469993	0.796834	P52196
Q9D7A8	Combo-Control	0.469833	0.649222	0.723686	7	0.492728	0.66236	NA	0.65	0	0.307393	Armc1	ARMC1_MOUSE	Armadillo repeat-containing protein 1	0.307393	0.469833	0.178906	Q9D7A8
Q8CAK3	Combo-Control	0.469593	0.140294	3.3472	27	0.00241394	0.0225565	NA	0.25	0	2.61727	Shfl Ryden	SHFL_MOUSE	Shiftless antiviral inhibitor of ribosomal frameshifting protein homolog (SHFL) (Repressor of yield of DENV protein homolog) (RyDEN)	2.61727	0.469593	1.64673	Q8CAK3
P01898	Combo-Control	0.468714	0.115348	4.06348	36	0.000250389	0.00575165	NA	0.478947	0	3.60139	H2-Q10	HA10_MOUSE	H-2 class I histocompatibility antigen, Q10 alpha chain	3.60139	0.468714	2.24021	P01898
Q9ET22	Combo-Control	0.467454	0.152745	3.06035	36	0.00416144	0.031735	NA	0.05	0	2.38076	Dpp7 Dpp2 Qpp	DPP2_MOUSE	Dipeptidyl peptidase 2 (EC 3.4.14.2) (Dipeptidyl aminopeptidase II) (Dipeptidyl peptidase 7) (Dipeptidyl peptidase II) (DPP II) (Quiescent cell proline dipeptidase)	2.38076	0.467454	1.49846	Q9ET22
Q8CBA2	Combo-Control	0.465909	0.174599	2.66846	36	0.0113534	0.0587561	NA	0.291667	0	1.94487	Slfn5	SLFN5_MOUSE	Schlafen family member 5	1.94487	0.465909	1.23095	Q8CBA2
Q9ERL7	Combo-Control	0.464467	0.180792	2.56907	36	0.0144871	0.0680765	NA	0	0	1.83902	Gmfg	GMFG_MOUSE	Glia maturation factor gamma (GMF-gamma)	1.83902	0.464467	1.167	Q9ERL7
Q91VW3	Combo-Control	0.460344	0.125898	3.65649	36	0.000810538	0.0112656	NA	0.444444	0	3.09123	Sh3bgrl3	SH3L3_MOUSE	SH3 domain-binding glutamic acid-rich-like protein 3	3.09123	0.460344	1.94825	Q91VW3
P10639	Combo-Control	0.455162	0.129213	3.52256	36	0.00118204	0.0141	NA	0.830508	0	2.92737	Txn Txn1	THIO_MOUSE	Thioredoxin (Trx) (ATL-derived factor) (ADF)	2.92737	0.455162	1.85078	P10639
Q60994	Combo-Control	0.454772	0.17662	2.57486	36	0.014285	0.0677872	NA	0	0	1.84512	Adipoq Acdc Acrp30 Apm1	ADIPO_MOUSE	Adiponectin (30 kDa adipocyte complement-related protein) (Adipocyte complement-related 30 kDa protein) (ACRP30) (Adipocyte, C1q and collagen domain-containing protein) (Adipocyte-specific protein AdipoQ)	1.84512	0.454772	1.16885	Q60994
P27870	Combo-Control	0.452025	0.119588	3.77986	36	0.000570101	0.00916806	NA	0.781395	0	3.24405	Vav1 Vav	VAV_MOUSE	Proto-oncogene vav (p95vav)	3.24405	0.452025	2.03772	P27870
P36371	Combo-Control	0.451792	0.159745	2.8282	36	0.00760096	0.0453343	NA	0.857143	0	2.11913	Tap2 Abcb3 Ham-2 Ham2	TAP2_MOUSE	Antigen peptide transporter 2 (APT2) (ATP-binding cassette sub-family B member 3) (Histocompatibility antigen modifier 2)	2.11913	0.451792	1.34357	P36371
Q61333	Combo-Control	0.451694	0.140593	3.21278	36	0.00277016	0.0248001	NA	0.627778	0	2.55749	Tnfaip2	TNAP2_MOUSE	Tumor necrosis factor alpha-induced protein 2 (TNF alpha-induced protein 2) (Primary response gene B94 protein)	2.55749	0.451694	1.60555	Q61333
P31725	Combo-Control	0.450292	0.263401	1.70953	36	0.0959604	0.227807	NA	0.846154	0	1.01791	S100a9 Cagb Mrp14	S10A9_MOUSE	Protein S100-A9 (Calgranulin-B) (Leukocyte L1 complex heavy chain) (Migration inhibitory factor-related protein 14) (MRP-14) (p14) (S100 calcium-binding protein A9)	1.01791	0.450292	0.642432	P31725
Q9Z2A5	Combo-Control	0.450009	0.329681	1.36498	5	0.230471	0.40538	NA	0.85	0	0.637384	Ate1	ATE1_MOUSE	Arginyl-tRNA--protein transferase 1 (Arginyltransferase 1) (R-transferase 1) (EC 2.3.2.8) (Arginine-tRNA--protein transferase 1)	0.637384	0.450009	0.392138	Q9Z2A5
Q04857	Combo-Control	0.449427	0.152527	2.94654	36	0.00560646	0.0375668	NA	0.941176	0	2.25131	Col6a1	CO6A1_MOUSE	Collagen alpha-1(VI) chain	2.25131	0.449427	1.4252	Q04857
P49182	Combo-Control	0.448847	0.489325	0.917279	35	0.365274	0.545024	NA	0.433333	0	0.437381	Serpind1 Hcf2 Hcii	HEP2_MOUSE	Heparin cofactor 2 (Heparin cofactor II) (HC-II) (Protease inhibitor leuserpin-2) (Serpin D1)	0.437381	0.448847	0.263584	P49182
O70145	Combo-Control	0.448749	0.0871953	5.14648	36	9.6e-06	0.000771498	NA	0.739474	0	5.01792	Ncf2 Noxa2 P67phox	NCF2_MOUSE	Neutrophil cytosol factor 2 (NCF-2) (67 kDa neutrophil oxidase factor) (NADPH oxidase activator 2) (Neutrophil NADPH oxidase factor 2) (p67-phox)	5.01792	0.448749	3.11267	O70145
Q8BJM5	Combo-Control	0.44861	0.652349	0.687684	8	0.511094	0.676163	NA	0.625	0	0.2915	Slc30a6 Znt6	ZNT6_MOUSE	Zinc transporter 6 (ZnT-6) (Solute carrier family 30 member 6)	0.2915	0.44861	0.169948	Q8BJM5
Q923D2	Combo-Control	0.445719	0.0895279	4.97855	36	1.6e-05	0.000995031	NA	0.830702	0	4.79476	Blvrb	BLVRB_MOUSE	Flavin reductase (NADPH) (FR) (EC 1.5.1.30) (Biliverdin reductase B) (BVR-B) (EC 1.3.1.24) (Biliverdin-IX beta-reductase) (NADPH-dependent diaphorase) (NADPH-flavin reductase) (FLR)	4.79476	0.445719	3.00216	Q923D2
Q810Q5	Combo-Control	0.444233	0.319169	1.39184	34	0.173009	0.337469	NA	0.05	0	0.761931	Nmes1	NMES1_MOUSE	Normal mucosa of esophagus-specific gene 1 protein	0.761931	0.444233	0.471766	Q810Q5
P56477	Combo-Control	0.440818	0.150672	2.92568	36	0.00591799	0.038757	NA	0.025	0	2.22783	Irf5	IRF5_MOUSE	Interferon regulatory factor 5 (IRF-5)	2.22783	0.440818	1.41165	P56477
Q91VC4	Combo-Control	0.44018	0.174074	2.52869	36	0.0159739	0.0724862	NA	0	0	1.79659	Plvap Pv1	PLVAP_MOUSE	Plasmalemma vesicle-associated protein (MECA-32 antigen) (Plasmalemma vesicle protein 1) (PV-1)	1.79659	0.44018	1.13974	Q91VC4
Q8K2Q9	Combo-Control	0.438612	0.136221	3.21986	36	0.00271778	0.0245335	NA	0.488235	0	2.56579	Shtn1 Kiaa1598	SHOT1_MOUSE	Shootin-1 (Shootin1)	2.56579	0.438612	1.61024	Q8K2Q9
Q8BHG9	Combo-Control	0.437615	0.136651	3.20243	35	0.00289992	0.0256445	NA	0.05	0	2.53761	Cggbp1	CGBP1_MOUSE	CGG triplet repeat-binding protein 1 (CGG-binding protein 1) (20 kDa CGG-binding protein) (p20-CGGBP DNA-binding protein)	2.53761	0.437615	1.59101	Q8BHG9
P97821	Combo-Control	0.437538	0.120581	3.62858	36	0.00087721	0.0118627	NA	0.819091	0	3.0569	Ctsc	CATC_MOUSE	Dipeptidyl peptidase 1 (EC 3.4.14.1) (Cathepsin C) (Cathepsin J) (Dipeptidyl peptidase I) (DPP-I) (DPPI) (Dipeptidyl transferase) [Cleaved into: Dipeptidyl peptidase 1 exclusion domain chain (Dipeptidyl peptidase I exclusion domain chain); Dipeptidyl peptidase 1 heavy chain (Dipeptidyl peptidase I heavy chain); Dipeptidyl peptidase 1 light chain (Dipeptidyl peptidase I light chain)]	3.0569	0.437538	1.92582	P97821
Q8R105	Combo-Control	0.435801	0.400631	1.08779	9	0.304961	0.484927	NA	0.566667	0	0.515756	Vps37c	VP37C_MOUSE	Vacuolar protein sorting-associated protein 37C (ESCRT-I complex subunit VPS37C)	0.515756	0.435801	0.314324	Q8R105
Q3UND0	Combo-Control	0.435693	0.0951951	4.57685	36	5.43e-05	0.00214414	NA	0	0	4.26504	Skap2 Prap Ra70 Saps Scap2 Skap55r	SKAP2_MOUSE	Src kinase-associated phosphoprotein 2 (Pyk2/RAFTK-associated protein) (SKAP55 homolog) (SKAP-HOM) (Src family-associated phosphoprotein 2) (Src kinase-associated phosphoprotein 55-related protein) (Src-associated adapter protein with PH and SH3 domains)	4.26504	0.435693	2.66875	Q3UND0
P54310	Combo-Control	0.435464	0.257328	1.69225	36	0.0992369	0.233796	NA	0.725	0	1.00333	Lipe	LIPS_MOUSE	Hormone-sensitive lipase (HSL) (EC 3.1.1.79)	1.00333	0.435464	0.631162	P54310
O70589	Combo-Control	0.433601	0.220838	1.96344	24	0.0612832	0.1709	NA	0.25	0	1.21266	Cask	CSKP_MOUSE	Peripheral plasma membrane protein CASK (EC 2.7.11.1) (Calcium/calmodulin-dependent serine protein kinase)	1.21266	0.433601	0.767257	O70589
P48758	Combo-Control	0.432811	0.150749	2.87107	36	0.00681211	0.0424364	NA	0.05	0	2.16672	Cbr1 Cbr	CBR1_MOUSE	Carbonyl reductase [NADPH] 1 (EC 1.1.1.184) (15-hydroxyprostaglandin dehydrogenase [NADP(+)]) (EC 1.1.1.197) (NADPH-dependent carbonyl reductase 1) (Prostaglandin 9-ketoreductase) (Prostaglandin-E(2) 9-reductase) (EC 1.1.1.189)	2.16672	0.432811	1.37226	P48758
A2AIV8	Combo-Control	0.432574	0.198288	2.18154	25	0.0387563	0.127791	NA	0.4	0	1.41166	Card9	CARD9_MOUSE	Caspase recruitment domain-containing protein 9	1.41166	0.432574	0.893501	A2AIV8
Q8C5K5	Combo-Control	0.432367	0.272161	1.58865	26	0.124228	0.269296	NA	0.525	0	0.905779	NA	CX038_MOUSE	Uncharacterized protein CXorf38 homolog	0.905779	0.432367	0.569771	Q8C5K5
Q61599	Combo-Control	0.431273	0.114025	3.78226	36	0.000566186	0.00916806	NA	0.864865	0	3.24704	Arhgdib Gdid4	GDIR2_MOUSE	Rho GDP-dissociation inhibitor 2 (Rho GDI 2) (D4) (Rho-GDI beta)	3.24704	0.431273	2.03772	Q61599
P0DOV1	Combo-Control	0.429904	0.107951	3.98239	36	0.000317372	0.00659345	NA	0.69375	0	3.49843	Mnda Ifi205b	IFI5B_MOUSE	Interferon-activable protein 205-B (Ifi-205-B) (Interferon-inducible protein p205-B) (Myeloid cell nuclear differentiation antigen) (Protein D3)	3.49843	0.429904	2.18089	P0DOV1
Q9CZS1	Combo-Control	0.428492	0.183563	2.3343	23	0.0286762	0.10534	NA	0.683333	0	1.54248	Aldh1b1 Aldhx	AL1B1_MOUSE	Aldehyde dehydrogenase X, mitochondrial (EC 1.2.1.3) (Aldehyde dehydrogenase family 1 member B1)	1.54248	0.428492	0.977406	Q9CZS1
Q9D110	Combo-Control	0.427655	0.127715	3.34852	29	0.0022641	0.0217976	NA	0.216667	0	2.6451	Mthfs	MTHFS_MOUSE	5-formyltetrahydrofolate cyclo-ligase (EC 6.3.3.2) (5,10-methenyl-tetrahydrofolate synthetase) (MTHFS) (Methenyl-THF synthetase)	2.6451	0.427655	1.66159	Q9D110
P05555	Combo-Control	0.427355	0.0829679	5.15085	36	9.47e-06	0.000771498	NA	0.934058	0	5.02373	Itgam	ITAM_MOUSE	Integrin alpha-M (CD11 antigen-like family member B) (CR-3 alpha chain) (Cell surface glycoprotein MAC-1 subunit alpha) (Leukocyte adhesion receptor MO1) (CD antigen CD11b)	5.02373	0.427355	3.11267	P05555
Q8C3J5	Combo-Control	0.427283	0.129303	3.30451	36	0.00215978	0.0213654	NA	0.775	0	2.66559	Dock2	DOCK2_MOUSE	Dedicator of cytokinesis protein 2 (Protein Hch)	2.66559	0.427283	1.67029	Q8C3J5
Q91XB0	Combo-Control	0.426659	0.102157	4.17649	36	0.000179549	0.00452268	NA	0.634	0	3.74582	Trex1	TREX1_MOUSE	Three-prime repair exonuclease 1 (EC 3.1.11.2) (3'-5' exonuclease TREX1)	3.74582	0.426659	2.3446	Q91XB0
P14094	Combo-Control	0.426043	0.516971	0.824114	31	0.416171	0.593047	NA	0.216667	0	0.380728	Atp1b1 Atp4b	AT1B1_MOUSE	Sodium/potassium-transporting ATPase subunit beta-1 (Sodium/potassium-dependent ATPase subunit beta-1)	0.380728	0.426043	0.226911	P14094
O35892	Combo-Control	0.423549	0.105455	4.01639	36	0.00028739	0.0062082	NA	0.1	0	3.54153	Sp100	SP100_MOUSE	Nuclear autoantigen Sp-100 (Nuclear dot-associated Sp100 protein) (Speckled 100 kDa)	3.54153	0.423549	2.20703	O35892
P17515	Combo-Control	0.421541	0.536003	0.786452	20	0.440823	0.616442	NA	0.55	0	0.355736	Cxcl10 Crg2 Ifi10 Inp10 Scyb10	CXL10_MOUSE	C-X-C motif chemokine 10 (10 kDa interferon gamma-induced protein) (Gamma-IP10) (IP-10) (C7) (Interferon-gamma induced protein CRG-2) (Small-inducible cytokine B10)	0.355736	0.421541	0.210108	P17515
Q62191	Combo-Control	0.420994	0.104538	4.02717	36	0.00027848	0.00613786	NA	0.291667	0	3.55521	Trim21 Ro52 Ssa1	RO52_MOUSE	E3 ubiquitin-protein ligase TRIM21 (EC 2.3.2.27) (52 kDa Ro protein) (52 kDa ribonucleoprotein autoantigen Ro/SS-A) (RING-type E3 ubiquitin transferase TRIM21) (Ro(SS-A)) (Sjoegren syndrome type A antigen) (SS-A) (Tripartite motif-containing protein 21)	3.55521	0.420994	2.21198	Q62191
Q3UQN2	Combo-Control	0.420531	0.141163	2.97904	36	0.00515173	0.0360787	NA	0.536364	0	2.28805	Fcho2	FCHO2_MOUSE	F-BAR domain only protein 2	2.28805	0.420531	1.44275	Q3UQN2
Q8R0G7	Combo-Control	0.420462	0.562706	0.747215	12	0.469323	0.642036	NA	0.6	0	0.328528	Spns1	SPNS1_MOUSE	Protein spinster homolog 1	0.328528	0.420462	0.19244	Q8R0G7
Q8BZ36	Combo-Control	0.419918	0.275871	1.52215	9	0.1623	0.322667	NA	0.65	0	0.789683	Rint1	RINT1_MOUSE	RAD50-interacting protein 1 (RAD50 interactor 1) (RINT-1)	0.789683	0.419918	0.491246	Q8BZ36
Q8BV49	Combo-Control	0.418639	0.171944	2.43474	36	0.0199882	0.0840978	NA	0.366667	0	1.69923	Pyhin1 Ifi209 Ifix	IFIX_MOUSE	Pyrin and HIN domain-containing protein 1 (Interferon-inducible protein 209) (Ifi-209) (Interferon-inducible protein X) (Interferon-inducible protein p209)	1.69923	0.418639	1.07522	Q8BV49
P70402	Combo-Control	0.417699	0.447333	0.933753	24	0.359731	0.539908	NA	0.765385	0	0.444022	Mybph	MYBPH_MOUSE	Myosin-binding protein H (MyBP-H) (H-protein)	0.444022	0.417699	0.267681	P70402
Q8K337	Combo-Control	0.41747	0.187265	2.22931	24	0.0354123	0.120786	NA	0.25	0	1.45085	Inpp5b	I5P2_MOUSE	Type II inositol 1,4,5-trisphosphate 5-phosphatase (EC 3.1.3.36) (Inositol polyphosphate-5-phosphatase B) (Phosphoinositide 5-phosphatase) (5PTase)	1.45085	0.41747	0.917984	Q8K337
Q8R2Q8	Combo-Control	0.41728	0.138873	3.00475	36	0.00481686	0.0344655	NA	0.655172	0	2.31724	Bst2	BST2_MOUSE	Bone marrow stromal antigen 2 (BST-2) (HM1.24 antigen) (CD antigen CD317)	2.31724	0.41728	1.46262	Q8R2Q8
Q9DB60	Combo-Control	0.417189	0.192295	2.16952	35	0.036919	0.124012	NA	0.05	0	1.43275	Prxl2b Fam213b	PXL2B_MOUSE	Prostamide/prostaglandin F synthase (Prostamide/PG F synthase) (Prostamide/PGF synthase) (EC 1.11.1.20) (Peroxiredoxin-like 2B)	1.43275	0.417189	0.906535	Q9DB60
Q9D1X0	Combo-Control	0.415717	0.185659	2.23914	28	0.033273	0.116698	NA	0.5	0	1.47791	Nol3 Arc	NOL3_MOUSE	Nucleolar protein 3 (Apoptosis repressor with CARD)	1.47791	0.415717	0.932938	Q9D1X0
Q8BUV3	Combo-Control	0.414948	0.22977	1.80593	34	0.0797896	0.201072	NA	0.383333	0	1.09805	Gphn	GEPH_MOUSE	Gephyrin [Includes: Molybdopterin adenylyltransferase (MPT adenylyltransferase) (EC 2.7.7.75) (Domain G); Molybdopterin molybdenumtransferase (MPT Mo-transferase) (EC 2.10.1.1) (Domain E)]	1.09805	0.414948	0.696649	Q8BUV3
P56375	Combo-Control	0.414214	0.242938	1.70502	27	0.0996723	0.234372	NA	0.1	0	1.00143	Acyp2 Acyp	ACYP2_MOUSE	Acylphosphatase-2 (EC 3.6.1.7) (Acylphosphatase, muscle type isozyme) (Acylphosphate phosphohydrolase 2)	1.00143	0.414214	0.630095	P56375
Q9D0S9	Combo-Control	0.413544	0.0912944	4.52979	36	6.26e-05	0.00234286	NA	0.56	0	4.20349	Hint2	HINT2_MOUSE	Histidine triad nucleotide-binding protein 2, mitochondrial (HINT-2) (EC 3.-.-.-) (HINT-3)	4.20349	0.413544	2.63025	Q9D0S9
Q921S7	Combo-Control	0.413117	0.386714	1.06828	1	0.478992	0.650543	NA	0.85	0	0.319671	Mrpl37	RM37_MOUSE	39S ribosomal protein L37, mitochondrial (L37mt) (MRP-L37)	0.319671	0.413117	0.186724	Q921S7
Q62418	Combo-Control	0.412295	0.079566	5.18179	36	8.61e-06	0.000750153	NA	0.848485	0	5.06494	Dbnl Abp1 Sh3p7	DBNL_MOUSE	Drebrin-like protein (Actin-binding protein 1) (SH3 domain-containing protein 7)	5.06494	0.412295	3.12485	Q62418
Q6P3D0	Combo-Control	0.410962	0.141959	2.89493	36	0.00640686	0.04073	NA	0.075	0	2.19335	Nudt16	NUD16_MOUSE	U8 snoRNA-decapping enzyme (EC 3.6.1.62) (IDP phosphatase) (IDPase) (EC 3.6.1.64) (Inosine diphosphate phosphatase) (Nucleoside diphosphate-linked moiety X motif 16) (Nudix motif 16) (m7GpppN-mRNA hydrolase)	2.19335	0.410962	1.39009	Q6P3D0
O88939	Combo-Control	0.40983	0.171175	2.39422	17	0.0284571	0.104816	NA	0.55	0	1.54581	Zbtb7a Lrf Zbtb7	ZBT7A_MOUSE	Zinc finger and BTB domain-containing protein 7A (Leukemia/lymphoma-related factor) (POZ and Krueppel erythroid myeloid ontogenic factor) (POK erythroid myeloid ontogenic factor) (Pokemon)	1.54581	0.40983	0.979574	O88939
O08638	Combo-Control	0.409639	0.237184	1.72709	36	0.0927238	0.222437	NA	0.894068	0	1.03281	Myh11	MYH11_MOUSE	Myosin-11 (Myosin heavy chain 11) (Myosin heavy chain, smooth muscle isoform) (SMMHC)	1.03281	0.409639	0.652792	O08638
Q9WTX8	Combo-Control	0.409142	0.289736	1.41212	17	0.175958	0.34036	NA	0.55	0	0.754591	Mad1l1 Mad1	MD1L1_MOUSE	Mitotic spindle assembly checkpoint protein MAD1 (Mitotic arrest deficient 1-like protein 1) (MAD1-like protein 1)	0.754591	0.409142	0.468062	Q9WTX8
Q8K1E6	Combo-Control	0.406714	0.429442	0.947076	12	0.362282	0.542424	NA	0.75	0	0.440953	Alkbh3 Abh3	ALKB3_MOUSE	Alpha-ketoglutarate-dependent dioxygenase alkB homolog 3 (EC 1.14.11.54) (Alkylated DNA repair protein alkB homolog 3) (mAbh3)	0.440953	0.406714	0.265661	Q8K1E6
B2RXR6	Combo-Control	0.406401	0.135927	2.98985	36	0.00500831	0.0354748	NA	0.816667	0	2.30031	Ankrd44	ANR44_MOUSE	Serine/threonine-protein phosphatase 6 regulatory ankyrin repeat subunit B (PP6-ARS-B) (Serine/threonine-protein phosphatase 6 regulatory subunit ARS-B) (Ankyrin repeat domain-containing protein 44)	2.30031	0.406401	1.45008	B2RXR6
Q3TBT3	Combo-Control	0.405947	0.0925304	4.38718	36	9.6e-05	0.00313402	NA	0.664	0	4.01774	Sting1 Eris Mita Mpys Tmem173	STING_MOUSE	Stimulator of interferon genes protein (mSTING) (Endoplasmic reticulum interferon stimulator) (ERIS) (Mediator of IRF3 activation) (MMITA) (Transmembrane protein 173)	4.01774	0.405947	2.5039	Q3TBT3
Q8VDQ8	Combo-Control	0.405465	0.0759102	5.34138	36	5.28e-06	0.000558689	NA	0	0	5.27774	Sirt2 Sir2l2	SIR2_MOUSE	NAD-dependent protein deacetylase sirtuin-2 (EC 2.3.1.286) (Regulatory protein SIR2 homolog 2) (SIR2-like protein 2) (mSIR2L2)	5.27774	0.405465	3.25283	Q8VDQ8
P08905	Combo-Control	0.405344	0.189689	2.13689	36	0.0394736	0.129208	NA	0.75	0	1.40369	Lyz2 Lyz Lyzs	LYZ2_MOUSE	Lysozyme C-2 (EC 3.2.1.17) (1,4-beta-N-acetylmuramidase C) (Lysozyme C type M)	1.40369	0.405344	0.888712	P08905
D3Z4S3	Combo-Control	0.405284	0.336979	1.2027	20	0.243139	0.4186	NA	0.45	0	0.614146	Ptrhd1	PTRD1_MOUSE	Putative peptidyl-tRNA hydrolase PTRHD1 (EC 3.1.1.29) (Peptidyl-tRNA hydrolase domain-containing protein 1)	0.614146	0.405284	0.378201	D3Z4S3
Q9Z0J0	Combo-Control	0.405209	0.0960759	4.21759	36	0.000158999	0.00428879	NA	0.827586	0	3.79861	Npc2	NPC2_MOUSE	NPC intracellular cholesterol transporter 2 (Epididymal secretory protein E1) (mE1) (Niemann Pick type C2 protein homolog)	3.79861	0.405209	2.36766	Q9Z0J0
O88512	Combo-Control	0.40458	0.6481	0.624255	26	0.5379	0.699173	NA	0.45	0	0.269299	Ap1g2	AP1G2_MOUSE	AP-1 complex subunit gamma-like 2 (Gamma2-adaptin) (G2ad)	0.269299	0.40458	0.155415	O88512
P46412	Combo-Control	0.404498	0.167177	2.41958	36	0.020716	0.0860755	NA	0.40625	0	1.68369	Gpx3	GPX3_MOUSE	Glutathione peroxidase 3 (GPx-3) (GSHPx-3) (EC 1.11.1.9) (Plasma glutathione peroxidase) (GPx-P) (GSHPx-P)	1.68369	0.404498	1.06512	P46412
P26151	Combo-Control	0.403171	0.133368	3.023	36	0.00459168	0.0335077	NA	0.639583	0	2.33803	Fcgr1 Fcg1	FCGR1_MOUSE	High affinity immunoglobulin gamma Fc receptor I (IgG Fc receptor I) (Fc-gamma RI) (FcRI) (CD antigen CD64)	2.33803	0.403171	1.47486	P26151
P08228	Combo-Control	0.402116	0.106775	3.76601	36	0.000593182	0.00923153	NA	0.912281	0	3.22681	Sod1	SODC_MOUSE	Superoxide dismutase [Cu-Zn] (EC 1.15.1.1)	3.22681	0.402116	2.03473	P08228
Q3U1Z5	Combo-Control	0.401667	0.114634	3.50389	36	0.00124537	0.0145488	NA	0.5125	0	2.9047	Gpsm3	GPSM3_MOUSE	G-protein-signaling modulator 3	2.9047	0.401667	1.83717	Q3U1Z5
P10107	Combo-Control	0.400803	0.259988	1.54162	36	0.131911	0.281453	NA	0.959016	0	0.879719	Anxa1 Anx1 Lpc-1 Lpc1	ANXA1_MOUSE	Annexin A1 (Annexin I) (Annexin-1) (Calpactin II) (Calpactin-2) (Chromobindin-9) (Lipocortin I) (Phospholipase A2 inhibitory protein) (p35)	0.879719	0.400803	0.550594	P10107
Q6A0D4	Combo-Control	0.397088	0.222441	1.78514	30	0.0843534	0.209173	NA	0.55	0	1.0739	Rftn1 Kiaa0084	RFTN1_MOUSE	Raftlin (Raft-linking protein)	1.0739	0.397088	0.679494	Q6A0D4
Q3TQI7	Combo-Control	0.395683	0.381478	1.03724	7	0.334122	0.516652	NA	0.75	0	0.476095	NA	TLS1_MOUSE	Telomere length and silencing protein 1 homolog	0.476095	0.395683	0.286802	Q3TQI7
Q61646	Combo-Control	0.394225	0.243515	1.61889	36	0.114199	0.25652	NA	0.796875	0	0.942337	Hp	HPT_MOUSE	Haptoglobin [Cleaved into: Haptoglobin alpha chain; Haptoglobin beta chain]	0.942337	0.394225	0.590879	Q61646
Q91WB4	Combo-Control	0.393192	0.0854806	4.59978	34	5.64e-05	0.00217584	NA	0.25	0	4.2488	Plekhf2	PKHF2_MOUSE	Pleckstrin homology domain-containing family F member 2 (PH domain-containing family F member 2)	4.2488	0.393192	2.66237	Q91WB4
Q8C172	Combo-Control	0.390912	0.180371	2.16726	32	0.0377652	0.125556	NA	0.15	0	1.42291	Cers6 Lass6	CERS6_MOUSE	Ceramide synthase 6 (CerS6) (EC 2.3.1.-) (LAG1 longevity assurance homolog 6)	1.42291	0.390912	0.901162	Q8C172
Q9CR51	Combo-Control	0.389988	0.116963	3.33427	36	0.001991	0.0205831	NA	0.325	0	2.70093	Atp6v1g1 Atp6g1	VATG1_MOUSE	V-type proton ATPase subunit G 1 (V-ATPase subunit G 1) (V-ATPase 13 kDa subunit 1) (Vacuolar proton pump subunit G 1)	2.70093	0.389988	1.68649	Q9CR51
Q9D1L9	Combo-Control	0.388871	0.075685	5.13802	36	9.85e-06	0.000771498	NA	0.06	0	5.00666	Lamtor5 Hbxip Xip	LTOR5_MOUSE	Ragulator complex protein LAMTOR5 (Late endosomal/lysosomal adaptor and MAPK and MTOR activator 5)	5.00666	0.388871	3.11267	Q9D1L9
Q9CQI6	Combo-Control	0.388328	0.148594	2.61335	36	0.0130038	0.0638344	NA	0.865068	0	1.88593	Cotl1 Clp	COTL1_MOUSE	Coactosin-like protein	1.88593	0.388328	1.19495	Q9CQI6
P59114	Combo-Control	0.388144	0.253024	1.53402	34	0.134279	0.285384	NA	0.3	0	0.871991	Pcif1	CAPAM_MOUSE	mRNA (2'-O-methyladenosine-N(6)-)-methyltransferase (EC 2.1.1.62) (Cap-specific adenosine methyltransferase) (CAPAM) (Phosphorylated CTD-interacting factor 1)	0.871991	0.388144	0.54457	P59114
Q91XV3	Combo-Control	0.385744	0.13494	2.85862	36	0.00703291	0.0431312	NA	0.782609	0	2.15286	Basp1 Nap22	BASP1_MOUSE	Brain acid soluble protein 1 (22 kDa neuronal tissue-enriched acidic protein) (Neuronal axonal membrane protein NAP-22)	2.15286	0.385744	1.36521	Q91XV3
Q571E4	Combo-Control	0.385647	0.123154	3.13143	36	0.00344585	0.0282833	NA	0.53	0	2.4627	Galns	GALNS_MOUSE	N-acetylgalactosamine-6-sulfatase (EC 3.1.6.4) (Chondroitinsulfatase) (Chondroitinase) (Galactose-6-sulfate sulfatase) (N-acetylgalactosamine-6-sulfate sulfatase) (GalNAc6S sulfatase)	2.4627	0.385647	1.54847	Q571E4
Q60953	Combo-Control	0.384114	0.107398	3.57655	36	0.00101589	0.0126903	NA	0.786207	0	2.99315	Pml	PML_MOUSE	Protein PML	2.99315	0.384114	1.89653	Q60953
P28798	Combo-Control	0.383826	0.275998	1.39069	36	0.172858	0.337326	NA	0.906542	0	0.76231	Grn	GRN_MOUSE	Progranulin (PGRN) (Acrogranin) (Epithelin/granulin precursor) (Glycoprotein of 88 Kda) (GP88) (Glycoprotein 88) (PC cell-derived growth factor) (PCDGF) (Proepithelin) (PEPI) [Cleaved into: Paragranulin; Granulin-1; Granulin-2; Granulin-3; Granulin-4; Granulin-5; Granulin-6; Granulin-7]	0.76231	0.383826	0.47195	P28798
Q9CWP6	Combo-Control	0.383337	0.114619	3.34443	36	0.00193631	0.0201618	NA	0.192857	0	2.71302	Mospd2	MSPD2_MOUSE	Motile sperm domain-containing protein 2	2.71302	0.383337	1.69547	Q9CWP6
O09164	Combo-Control	0.382086	0.173206	2.20596	36	0.0338546	0.11788	NA	0.702381	0	1.47038	Sod3	SODE_MOUSE	Extracellular superoxide dismutase [Cu-Zn] (EC-SOD) (EC 1.15.1.1)	1.47038	0.382086	0.928559	O09164
Q9CPY7	Combo-Control	0.381611	0.146639	2.60238	36	0.0133577	0.0649597	NA	0.90991	0	1.87427	Lap3 Lapep	AMPL_MOUSE	Cytosol aminopeptidase (EC 3.4.11.1) (Leucine aminopeptidase 3) (LAP-3) (Leucyl aminopeptidase) (Proline aminopeptidase) (EC 3.4.11.5) (Prolyl aminopeptidase)	1.87427	0.381611	1.18736	Q9CPY7
Q8K1Z0	Combo-Control	0.381195	0.198123	1.92403	36	0.062284	0.172473	NA	0.379167	0	1.20562	Coq9	COQ9_MOUSE	Ubiquinone biosynthesis protein COQ9, mitochondrial	1.20562	0.381195	0.76328	Q8K1Z0
P01675	Combo-Control	0.380903	0.318909	1.1944	29	0.242001	0.418112	NA	0.1	0	0.616182	NA	NA	NA	0.616182	0.380903	0.378707	P01675;P01676;P01677;P01678;P01679
Q9Z223	Combo-Control	0.379643	0.21425	1.77196	24	0.0890979	0.217095	NA	0.3	0	1.05013	Mocs2	MOC2B_MOUSE	Molybdopterin synthase catalytic subunit (EC 2.8.1.12) (Molybdenum cofactor synthesis protein 2 large subunit) (Molybdenum cofactor synthesis protein 2B) (MOCS2B)	1.05013	0.379643	0.66335	Q9Z223
Q61838	Combo-Control	0.379498	0.224568	1.68991	36	0.0996891	0.234372	NA	0.950739	0	1.00135	Pzp A2m	PZP_MOUSE	Pregnancy zone protein (Alpha-2-macroglobulin) (Alpha-2-M) [Cleaved into: Alpha-2-macroglobulin 165 kDa subunit; Alpha-2-macroglobulin 35 kDa subunit]	1.00135	0.379498	0.630095	Q61838
Q05144	Combo-Control	0.378715	0.128144	2.9554	36	0.00547898	0.0372296	NA	0.615385	0	2.2613	Rac2	RAC2_MOUSE	Ras-related C3 botulinum toxin substrate 2 (Protein EN-7) (p21-Rac2)	2.2613	0.378715	1.42911	Q05144
Q93092	Combo-Control	0.377288	0.11939	3.16013	36	0.00319135	0.0274333	NA	0.903846	0	2.49603	Taldo1 Tal Taldo	TALDO_MOUSE	Transaldolase (EC 2.2.1.2)	2.49603	0.377288	1.56172	Q93092
Q99LQ7	Combo-Control	0.376017	0.150651	2.49594	18	0.0224969	0.0907601	NA	0.4	0	1.64788	Tmem189	TM189_MOUSE	Plasmanylethanolamine desaturase (EC 1.14.99.19) (Transmembrane protein 189)	1.64788	0.376017	1.04211	Q99LQ7
Q921M4	Combo-Control	0.375617	0.379007	0.991054	36	0.328274	0.509059	NA	0.563158	0	0.483764	Golga2	GOGA2_MOUSE	Golgin subfamily A member 2 (130 kDa cis-Golgi matrix protein) (GM130)	0.483764	0.375617	0.293232	Q921M4
Q9CQW0	Combo-Control	0.37519	0.704087	0.532875	11	0.604718	0.752346	NA	0.75	0	0.218447	Emc6 Tmem93	EMC6_MOUSE	ER membrane protein complex subunit 6 (Transmembrane protein 93)	0.218447	0.37519	0.123583	Q9CQW0
O09044	Combo-Control	0.374592	0.137649	2.72136	36	0.00995334	0.0539543	NA	0.1	0	2.00203	Snap23 Sndt	SNP23_MOUSE	Synaptosomal-associated protein 23 (SNAP-23) (Syndet) (Vesicle-membrane fusion protein SNAP-23)	2.00203	0.374592	1.26797	O09044
Q00519	Combo-Control	0.37375	0.125974	2.96689	36	0.00531752	0.0367654	NA	0.927273	0	2.27429	Xdh	XDH_MOUSE	Xanthine dehydrogenase/oxidase [Includes: Xanthine dehydrogenase (XD) (EC 1.17.1.4); Xanthine oxidase (XO) (EC 1.17.3.2) (Xanthine oxidoreductase) (XOR)]	2.27429	0.37375	1.43456	Q00519
Q07797	Combo-Control	0.373145	0.126546	2.94869	36	0.00557522	0.0374837	NA	0.739474	0	2.25374	Lgals3bp Cycap Mama	LG3BP_MOUSE	Galectin-3-binding protein (Cyp-C-associated protein) (CyCAP) (Lectin galactoside-binding soluble 3-binding protein) (Protein MAMA)	2.25374	0.373145	1.42616	Q07797
P36423	Combo-Control	0.372321	0.205986	1.8075	35	0.0792856	0.200267	NA	0.25	0	1.10081	Tbxas1 Cyp5 Cyp5a1	THAS_MOUSE	Thromboxane-A synthase (TS) (TXA synthase) (TXS) (EC 5.3.99.5) (Cytochrome P450 5A1)	1.10081	0.372321	0.698392	P36423
O88947	Combo-Control	0.369316	0.220947	1.67152	36	0.103292	0.240028	NA	0	0	0.985935	F10	FA10_MOUSE	Coagulation factor X (EC 3.4.21.6) (Stuart factor) [Cleaved into: Factor X light chain; Factor X heavy chain; Activated factor Xa heavy chain]	0.985935	0.369316	0.619738	O88947
P04104	Combo-Control	0.369267	0.678075	0.544581	36	0.5894	0.740349	NA	0.969697	0	0.22959	Krt1 Krt2-1	K2C1_MOUSE	Keratin, type II cytoskeletal 1 (67 kDa cytokeratin) (Cytokeratin-1) (CK-1) (Keratin-1) (K1) (Type-II keratin Kb1)	0.22959	0.369267	0.130563	P04104
Q91ZU6	Combo-Control	0.368549	0.276561	1.33261	33	0.191788	0.358021	NA	0.391667	0	0.717179	Dst Bpag1 Macf2	DYST_MOUSE	Dystonin (Bullous pemphigoid antigen 1) (BPA) (Dystonia musculorum protein) (Hemidesmosomal plaque protein) (Microtubule actin cross-linking factor 2)	0.717179	0.368549	0.446091	Q91ZU6
P97352	Combo-Control	0.367624	0.0798965	4.60125	36	5.05e-05	0.0021069	NA	0.583333	0	4.29701	S100a13	S10AD_MOUSE	Protein S100-A13 (S100 calcium-binding protein A13)	4.29701	0.367624	2.67636	P97352
Q3TVI8	Combo-Control	0.367302	0.243196	1.51031	36	0.139693	0.292594	NA	0.7175	0	0.854825	Pbxip1 Hpip	PBIP1_MOUSE	Pre-B-cell leukemia transcription factor-interacting protein 1 (Hematopoietic PBX-interacting protein)	0.854825	0.367302	0.533735	Q3TVI8
P70387	Combo-Control	0.367225	0.13961	2.63036	26	0.0141436	0.0673869	NA	0.25	0	1.84944	Hfe Mr2	HFE_MOUSE	Hereditary hemochromatosis protein homolog	1.84944	0.367225	1.17142	P70387
Q61704	Combo-Control	0.366175	0.228604	1.60179	36	0.117943	0.260761	NA	0.711667	0	0.928329	Itih3	ITIH3_MOUSE	Inter-alpha-trypsin inhibitor heavy chain H3 (ITI heavy chain H3) (ITI-HC3) (Inter-alpha-inhibitor heavy chain 3)	0.928329	0.366175	0.583758	Q61704
Q8R2K1	Combo-Control	0.365807	0.105051	3.4822	35	0.00135395	0.0154301	NA	0.05	0	2.8684	Fuom Le51	FUCM_MOUSE	Fucose mutarotase (EC 5.1.3.29)	2.8684	0.365807	1.81163	Q8R2K1
Q80VQ0	Combo-Control	0.364997	0.0965426	3.78068	36	0.000568767	0.00916806	NA	0.257692	0	3.24507	Aldh3b1 Aldh7	AL3B1_MOUSE	Aldehyde dehydrogenase family 3 member B1 (EC 1.2.1.28) (EC 1.2.1.5) (EC 1.2.1.7) (Aldehyde dehydrogenase 7)	3.24507	0.364997	2.03772	Q80VQ0
Q60787	Combo-Control	0.363961	0.261863	1.38989	35	0.173339	0.337695	NA	0.283333	0	0.761104	Lcp2	LCP2_MOUSE	Lymphocyte cytosolic protein 2 (SH2 domain-containing leukocyte protein of 76 kDa) (SLP-76 tyrosine phosphoprotein) (SLP76)	0.761104	0.363961	0.471475	Q60787
P01831	Combo-Control	0.363844	0.147502	2.46671	36	0.0185296	0.0798168	NA	0.595833	0	1.73214	Thy1 Thy-1	THY1_MOUSE	Thy-1 membrane glycoprotein (Thy-1 antigen) (CD antigen CD90)	1.73214	0.363844	1.09791	P01831
P70269	Combo-Control	0.363508	0.187167	1.94216	20	0.066335	0.178712	NA	0.4	0	1.17826	Ctse	CATE_MOUSE	Cathepsin E (EC 3.4.23.34)	1.17826	0.363508	0.747847	P70269
P54320	Combo-Control	0.362381	0.258493	1.4019	35	0.169752	0.332981	NA	0	0	0.770185	Eln	ELN_MOUSE	Elastin (Tropoelastin)	0.770185	0.362381	0.477581	P54320
Q8K010	Combo-Control	0.362271	0.100083	3.61969	36	0.000899519	0.0120186	NA	0.875472	0	3.04599	Oplah	OPLA_MOUSE	5-oxoprolinase (EC 3.5.2.9) (5-oxo-L-prolinase) (5-OPase) (Pyroglutamase)	3.04599	0.362271	1.92015	Q8K010
Q06770	Combo-Control	0.361779	0.319283	1.1331	36	0.264663	0.441648	NA	0.654	0	0.577307	Serpina6 Cbg	CBG_MOUSE	Corticosteroid-binding globulin (CBG) (Serpin A6) (Transcortin)	0.577307	0.361779	0.354924	Q06770
P97814	Combo-Control	0.360714	0.0787628	4.57975	36	5.38e-05	0.00214414	NA	0.51875	0	4.26885	Pstpip1	PPIP1_MOUSE	Proline-serine-threonine phosphatase-interacting protein 1 (PEST phosphatase-interacting protein 1)	4.26885	0.360714	2.66875	P97814
P01902	Combo-Control	0.358188	0.0939604	3.81211	36	0.000519665	0.00885885	NA	0.871795	0	3.28428	H2-K1 H2-K	HA1D_MOUSE	H-2 class I histocompatibility antigen, K-D alpha chain (H-2K(D))	3.28428	0.358188	2.05262	P01902
Q9D1L0	Combo-Control	0.357229	0.0981772	3.63861	36	0.000852648	0.0116421	NA	0.0909091	0	3.06923	Chchd2	CHCH2_MOUSE	Coiled-coil-helix-coiled-coil-helix domain-containing protein 2	3.06923	0.357229	1.93397	Q9D1L0
Q60590	Combo-Control	0.356962	0.292399	1.22081	36	0.230095	0.405303	NA	0.704839	0	0.638093	Orm1 Agp1 Orm-1	A1AG1_MOUSE	Alpha-1-acid glycoprotein 1 (AGP 1) (Orosomucoid-1) (OMD 1)	0.638093	0.356962	0.39222	Q60590
Q8BVW3	Combo-Control	0.356837	0.212472	1.67946	30	0.10345	0.240203	NA	0.34	0	0.98527	Trim14 Kiaa0129 Pub	TRI14_MOUSE	Tripartite motif-containing protein 14 (PU.1-binding protein)	0.98527	0.356837	0.619422	Q8BVW3
Q6DG52	Combo-Control	0.35663	0.160713	2.21904	33	0.0334724	0.116988	NA	0.05	0	1.47531	Churc1	CHUR_MOUSE	Protein Churchill	1.47531	0.35663	0.93186	Q6DG52
Q8BL66	Combo-Control	0.35515	0.0741811	4.78762	36	2.87e-05	0.00140015	NA	0.919231	0	4.54212	Eea1	EEA1_MOUSE	Early endosome antigen 1	4.54212	0.35515	2.85382	Q8BL66
Q8CCH2	Combo-Control	0.355133	0.108968	3.25906	36	0.00244412	0.022676	NA	0	0	2.61188	Nhlrc3	NHLC3_MOUSE	NHL repeat-containing protein 3	2.61188	0.355133	1.64443	Q8CCH2
Q6ZWR6	Combo-Control	0.35475	1.47454	0.240583	6	0.817888	0.896785	NA	0.925	0	0.0873064	Syne1	SYNE1_MOUSE	Nesprin-1 (Enaptin) (KASH domain-containing protein 1) (KASH1) (Myocyte nuclear envelope protein 1) (Myne-1) (Nuclear envelope spectrin repeat protein 1) (Synaptic nuclear envelope protein 1) (Syne-1)	0.0873064	0.35475	0.0473117	Q6ZWR6
Q99J87	Combo-Control	0.354621	0.130926	2.70856	36	0.0102765	0.0549515	NA	0.771053	0	1.98815	Dhx58 D11lgp2e Lgp2	DHX58_MOUSE	Probable ATP-dependent RNA helicase DHX58 (EC 3.6.4.13) (Probable ATP-dependent helicase LGP2) (Protein D11Lgp2) (RIG-I-like receptor 3) (RLR-3) (RIG-I-like receptor Lgp2) (RLR)	1.98815	0.354621	1.26002	Q99J87
Q8K0E8	Combo-Control	0.354603	0.203515	1.74239	36	0.0899781	0.218138	NA	0.955947	0	1.04586	Fgb	FIBB_MOUSE	Fibrinogen beta chain [Cleaved into: Fibrinopeptide B; Fibrinogen beta chain]	1.04586	0.354603	0.661269	Q8K0E8
Q9DBB5	Combo-Control	0.351873	0.137562	2.55793	36	0.0148843	0.0692685	NA	0.4125	0	1.82727	Eif4e3	IF4E3_MOUSE	Eukaryotic translation initiation factor 4E type 3 (eIF-4E type 3) (eIF-4E3) (eIF4E type 3) (eIF4E-3)	1.82727	0.351873	1.15946	Q9DBB5
Q8BH35	Combo-Control	0.351621	0.301938	1.16455	17	0.260284	0.437074	NA	0.5	0	0.584553	C8b	CO8B_MOUSE	Complement component C8 beta chain (Complement component 8 subunit beta)	0.584553	0.351621	0.359445	Q8BH35
Q9R002	Combo-Control	0.350838	0.105718	3.31863	36	0.00207807	0.0208382	NA	0.803922	0	2.68234	Ifi202 Ifi202a Ifi202b	IFI2_MOUSE	Interferon-activable protein 202 (Ifi-202) (Interferon-inducible protein p202) (Lupus susceptibility protein p202)	2.68234	0.350838	1.68114	Q9R002
Q9WUZ5	Combo-Control	0.350711	0.397874	0.881463	23	0.387186	0.567003	NA	0.2	0	0.41208	Tnni1	TNNI1_MOUSE	Troponin I, slow skeletal muscle (Troponin I, slow-twitch isoform)	0.41208	0.350711	0.246415	Q9WUZ5
O89017	Combo-Control	0.349604	0.0997848	3.50358	36	0.00124647	0.0145488	NA	0.747368	0	2.90432	Lgmn Prsc1	LGMN_MOUSE	Legumain (EC 3.4.22.34) (Asparaginyl endopeptidase) (Protease, cysteine 1)	2.90432	0.349604	1.83717	O89017
P99028	Combo-Control	0.348223	0.154206	2.25816	36	0.0300934	0.108797	NA	0.545455	0	1.52153	Uqcrh	QCR6_MOUSE	Cytochrome b-c1 complex subunit 6, mitochondrial (Complex III subunit 6) (Complex III subunit VIII) (Cytochrome c1 non-heme 11 kDa protein) (Mitochondrial hinge protein) (Ubiquinol-cytochrome c reductase complex 11 kDa protein)	1.52153	0.348223	0.963382	P99028
Q8K1B8	Combo-Control	0.347296	0.110608	3.13987	36	0.00336902	0.0280235	NA	0.84127	0	2.4725	Fermt3 Kind3 Urp2	URP2_MOUSE	Fermitin family homolog 3 (Kindlin-3) (Unc-112-related protein 2)	2.4725	0.347296	1.55248	Q8K1B8
Q9EQ20	Combo-Control	0.345892	0.235647	1.46784	36	0.150832	0.308195	NA	0.355556	0	0.821506	Aldh6a1	MMSA_MOUSE	Methylmalonate-semialdehyde dehydrogenase [acylating], mitochondrial (MMSDH) (Malonate-semialdehyde dehydrogenase [acylating]) (EC 1.2.1.18) (EC 1.2.1.27) (Aldehyde dehydrogenase family 6 member A1)	0.821506	0.345892	0.511175	Q9EQ20
Q6NVF0	Combo-Control	0.345844	0.12826	2.69643	34	0.0108217	0.0567488	NA	0.1	0	1.9657	Ocrl Ocrl1	OCRL_MOUSE	Inositol polyphosphate 5-phosphatase OCRL (EC 3.1.3.36) (EC 3.1.3.56) (Inositol polyphosphate 5-phosphatase OCRL-1) (Phosphatidylinositol 3,4,5-triphosphate 5-phosphatase) (EC 3.1.3.86)	1.9657	0.345844	1.24604	Q6NVF0
Q9QZK7	Combo-Control	0.344489	0.0942748	3.6541	36	0.00081605	0.0112656	NA	0.015	0	3.08828	Dok3 Dokl	DOK3_MOUSE	Docking protein 3 (Downstream of tyrosine kinase 3) (p62(dok)-like protein) (DOK-L)	3.08828	0.344489	1.94825	Q9QZK7
Q9JHQ5	Combo-Control	0.343614	0.157951	2.17545	36	0.0362422	0.122462	NA	0.516667	0	1.44078	Lztfl1	LZTL1_MOUSE	Leucine zipper transcription factor-like protein 1	1.44078	0.343614	0.911998	Q9JHQ5
Q9DCV7	Combo-Control	0.343297	0.29305	1.17146	36	0.249108	0.425502	NA	0.639474	0	0.603612	Krt7 Krt2-7	K2C7_MOUSE	Keratin, type II cytoskeletal 7 (Cytokeratin-7) (CK-7) (Keratin-7) (K7) (Type-II keratin Kb7)	0.603612	0.343297	0.371098	Q9DCV7
Q61878	Combo-Control	0.342398	0.312099	1.09708	36	0.27989	0.45793	NA	0.744286	0	0.553013	Prg2 Mbp-1	PRG2_MOUSE	Bone marrow proteoglycan (BMPG) (Proteoglycan 2) [Cleaved into: Eosinophil granule major basic protein (EMBP) (MBP)]	0.553013	0.342398	0.339201	Q61878
Q9D020	Combo-Control	0.341701	0.105469	3.23982	36	0.00257496	0.0236874	NA	0.333333	0	2.58923	Nt5c3a Nt5c3	5NT3A_MOUSE	Cytosolic 5'-nucleotidase 3A (EC 3.1.3.5) (7-methylguanosine phosphate-specific 5'-nucleotidase) (7-methylguanosine nucleotidase) (EC 3.1.3.91) (Cytosolic 5'-nucleotidase 3) (Cytosolic 5'-nucleotidase III) (cN-III) (Lupin) (Pyrimidine 5'-nucleotidase 1) (P5'N-1) (P5N-1) (PN-I)	2.58923	0.341701	1.62548	Q9D020
Q91VW5	Combo-Control	0.341635	0.337417	1.0125	17	0.325494	0.506739	NA	0.55	0	0.487457	Golga4	GOGA4_MOUSE	Golgin subfamily A member 4 (tGolgin-1)	0.487457	0.341635	0.295216	Q91VW5
Q8VHL1	Combo-Control	0.341623	0.337539	1.0121	19	0.324208	0.505461	NA	0.56	0	0.489177	Setd7 Kiaa1717 Set7 Set9	SETD7_MOUSE	Histone-lysine N-methyltransferase SETD7 (EC 2.1.1.-) (Histone H3-K4 methyltransferase SETD7) (H3-K4-HMTase SETD7) (SET domain-containing protein 7) (SET7/9)	0.489177	0.341623	0.296312	Q8VHL1
Q8VCM7	Combo-Control	0.341529	0.213245	1.60158	36	0.117988	0.260761	NA	0.945652	0	0.928161	Fgg	FIBG_MOUSE	Fibrinogen gamma chain	0.928161	0.341529	0.583758	Q8VCM7
Q9D0J8	Combo-Control	0.341436	0.155643	2.19371	36	0.0347963	0.119814	NA	0.655172	0	1.45847	Ptms	PTMS_MOUSE	Parathymosin	1.45847	0.341436	0.921493	Q9D0J8
Q9Z0R6	Combo-Control	0.340841	0.173117	1.96885	32	0.0576826	0.163698	NA	0.6	0	1.23895	Itsn2 Ese2 Sh3d1B	ITSN2_MOUSE	Intersectin-2 (EH domain and SH3 domain regulator of endocytosis 2) (EH and SH3 domains protein 2) (SH3 domain-containing protein 1B)	1.23895	0.340841	0.785957	Q9Z0R6
Q5EBG8	Combo-Control	0.340275	0.213883	1.59094	32	0.121454	0.265136	NA	0.475	0	0.915587	NA	CA050_MOUSE	Uncharacterized protein C1orf50 homolog	0.915587	0.340275	0.576532	Q5EBG8
Q62181	Combo-Control	0.339704	0.443248	0.766397	7	0.468493	0.641702	NA	0.716667	0	0.329297	Sema3c Semae SemE	SEM3C_MOUSE	Semaphorin-3C (Semaphorin-E) (Sema E)	0.329297	0.339704	0.192667	Q62181
O70172	Combo-Control	0.339556	0.0971451	3.49535	36	0.00127543	0.0147285	NA	0.263636	0	2.89434	Pip4k2a Pip5k2a	PI42A_MOUSE	Phosphatidylinositol 5-phosphate 4-kinase type-2 alpha (EC 2.7.1.149) (1-phosphatidylinositol 5-phosphate 4-kinase 2-alpha) (Diphosphoinositide kinase 2-alpha) (Phosphatidylinositol 5-phosphate 4-kinase type II alpha) (PI(5)P 4-kinase type II alpha) (PIP4KII-alpha) (PtdIns(5)P-4-kinase isoform 2-alpha)	2.89434	0.339556	1.83184	O70172
Q8K1T1	Combo-Control	0.338432	0.119116	2.84118	36	0.00735346	0.044531	NA	0.366667	0	2.13351	Lrrc25 Mapa	LRC25_MOUSE	Leucine-rich repeat-containing protein 25 (Monocyte and plasmacytoid-activated protein)	2.13351	0.338432	1.35134	Q8K1T1
O35955	Combo-Control	0.33758	0.147484	2.28893	36	0.0280557	0.103659	NA	0.824561	0	1.55198	Psmb10 Lmp10 Mecl1	PSB10_MOUSE	Proteasome subunit beta type-10 (EC 3.4.25.1) (Low molecular mass protein 10) (Macropain subunit MECl-1) (Multicatalytic endopeptidase complex subunit MECl-1) (Proteasome MECl-1) (Proteasome subunit beta-2i)	1.55198	0.33758	0.984395	O35955
Q8BZN6	Combo-Control	0.337354	0.263624	1.27968	20	0.215305	0.386303	NA	0.75	0	0.666947	Dock10 Kiaa0694 Ziz3	DOC10_MOUSE	Dedicator of cytokinesis protein 10 (Zizimin-3)	0.666947	0.337354	0.413072	Q8BZN6
Q8CJF7	Combo-Control	0.336867	0.249545	1.34993	26	0.188675	0.354184	NA	0.5	0	0.724285	Ahctf1 Elys	ELYS_MOUSE	Protein ELYS (Embryonic large molecule derived from yolk sac) (Protein MEL-28) (Putative AT-hook-containing transcription factor 1)	0.724285	0.336867	0.450771	Q8CJF7
Q99N69	Combo-Control	0.336466	0.146724	2.2932	35	0.0279587	0.103492	NA	0.483333	0	1.55348	Lpxn	LPXN_MOUSE	Leupaxin	1.55348	0.336466	0.985092	Q99N69
Q9ET01	Combo-Control	0.336278	0.115836	2.90306	36	0.00627412	0.0401998	NA	0.77125	0	2.20245	Pygl	PYGL_MOUSE	Glycogen phosphorylase, liver form (EC 2.4.1.1)	2.20245	0.336278	1.39578	Q9ET01
Q3UQA7	Combo-Control	0.335423	0.362307	0.925798	25	0.363402	0.543165	NA	0.3	0	0.439612	Selenoh	SELH_MOUSE	Selenoprotein H (SelH)	0.439612	0.335423	0.265069	Q3UQA7
Q9JIF9	Combo-Control	0.335135	0.722756	0.463691	26	0.646728	0.781981	NA	0.4625	0	0.189278	Myot Myo Ttid	MYOTI_MOUSE	Myotilin (Myofibrillar titin-like Ig domains protein) (Titin immunoglobulin domain protein)	0.189278	0.335135	0.106804	Q9JIF9
Q8VHY0	Combo-Control	0.335045	0.283505	1.1818	36	0.245034	0.420694	NA	0	0	0.610774	Cspg4 An2 Kiaa4232 Ng2	CSPG4_MOUSE	Chondroitin sulfate proteoglycan 4 (Chondroitin sulfate proteoglycan NG2) (Proteoglycan AN2)	0.610774	0.335045	0.376033	Q8VHY0
P09813	Combo-Control	0.334948	0.248056	1.35029	36	0.185352	0.350217	NA	0.230769	0	0.732003	Apoa2	APOA2_MOUSE	Apolipoprotein A-II (Apo-AII) (ApoA-II) (Apolipoprotein A2) [Cleaved into: Proapolipoprotein A-II (ProapoA-II)]	0.732003	0.334948	0.455663	P09813
P03953	Combo-Control	0.334869	0.207647	1.61269	36	0.115546	0.258609	NA	0.732	0	0.937245	Cfd Adn Df	CFAD_MOUSE	Complement factor D (EC 3.4.21.46) (28 kDa adipocyte protein) (Adipsin) (C3 convertase activator) (Properdin factor D)	0.937245	0.334869	0.587357	P03953
Q64449	Combo-Control	0.334586	0.198001	1.68982	35	0.0999518	0.234717	NA	0.283333	0	1.00021	Mrc2 Kiaa0709	MRC2_MOUSE	C-type mannose receptor 2 (Lectin lambda) (Macrophage mannose receptor 2) (CD antigen CD280)	1.00021	0.334586	0.629456	Q64449
O35368	Combo-Control	0.334349	0.146293	2.28548	36	0.028278	0.104319	NA	0.35	0	1.54855	Ifi203	IFI3_MOUSE	Interferon-activable protein 203 (Ifi-203) (Interferon-inducible protein p203)	1.54855	0.334349	0.981639	O35368
P55302	Combo-Control	0.332709	0.0940562	3.53735	36	0.00113411	0.0136407	NA	0.857143	0	2.94534	Lrpap1	AMRP_MOUSE	Alpha-2-macroglobulin receptor-associated protein (Alpha-2-MRAP) (Heparin-binding protein 44) (HBP-44) (Low density lipoprotein receptor-related protein-associated protein 1) (RAP)	2.94534	0.332709	1.86516	P55302
P07309	Combo-Control	0.332293	0.25833	1.28631	36	0.206545	0.376006	NA	0.793478	0	0.684984	Ttr	TTHY_MOUSE	Transthyretin (Prealbumin)	0.684984	0.332293	0.424805	P07309
P13634	Combo-Control	0.33226	0.286638	1.15916	34	0.254467	0.430255	NA	0.13	0	0.594368	Ca1 Car1	CAH1_MOUSE	Carbonic anhydrase 1 (EC 4.2.1.1) (Carbonate dehydratase I) (Carbonic anhydrase I) (CA-I)	0.594368	0.33226	0.366274	P13634
Q922B1	Combo-Control	0.331942	0.271619	1.22208	36	0.229617	0.404955	NA	0.421429	0	0.638995	Macrod1 Lrp16	MACD1_MOUSE	ADP-ribose glycohydrolase MACROD1 (MACRO domain-containing protein 1) (O-acetyl-ADP-ribose deacetylase MACROD1) (EC 3.1.1.106) (Protein LRP16) ([Protein ADP-ribosylaspartate] hydrolase MACROD1) (EC 3.2.2.-) ([Protein ADP-ribosylglutamate] hydrolase MACROD1) (EC 3.2.2.-)	0.638995	0.331942	0.392593	Q922B1
P30355	Combo-Control	0.331938	0.260775	1.27289	23	0.215774	0.386825	NA	0.3	0	0.666001	Alox5ap Flap	AL5AP_MOUSE	Arachidonate 5-lipoxygenase-activating protein (FLAP) (MK-886-binding protein)	0.666001	0.331938	0.412485	P30355
P14426	Combo-Control	0.331897	0.14448	2.29719	36	0.0275302	0.102181	NA	0.025	0	1.56019	H2-D1	HA13_MOUSE	H-2 class I histocompatibility antigen, D-K alpha chain (H-2D(K))	1.56019	0.331897	0.99063	P14426
Q8BVK9	Combo-Control	0.331698	0.110395	3.00464	36	0.00481818	0.0344655	NA	0.496667	0	2.31712	Sp110 Ifi75 Ipr1	SP110_MOUSE	Sp110 nuclear body protein (Intracellular pathogen resistance protein 1)	2.31712	0.331698	1.46262	Q8BVK9
Q0VEE6	Combo-Control	0.331412	0.205817	1.61023	6	0.158474	0.317293	NA	0.65	0	0.800042	Znf800 Zfp800	ZN800_MOUSE	Zinc finger protein 800	0.800042	0.331412	0.49854	Q0VEE6
Q9R257	Combo-Control	0.331409	0.0917142	3.61349	36	0.000915412	0.0120186	NA	0.285714	0	3.03838	Hebp1 Hbp	HEBP1_MOUSE	Heme-binding protein 1 (p22HBP)	3.03838	0.331409	1.92015	Q9R257
P01806	Combo-Control	0.330379	0.20188	1.63651	36	0.110447	0.250555	NA	0.204545	0	0.956845	NA	NA	NA	0.956845	0.330379	0.601097	P01806;P01807;P01808
P54116	Combo-Control	0.328537	0.161552	2.03362	36	0.0494108	0.148164	NA	0.36	0	1.30618	Stom Epb7.2 Epb72	STOM_MOUSE	Erythrocyte band 7 integral membrane protein (Protein 7.2b) (Stomatin)	1.30618	0.328537	0.829257	P54116
P28293	Combo-Control	0.327769	0.153056	2.1415	36	0.0390741	0.128336	NA	0.717742	0	1.40811	Ctsg	CATG_MOUSE	Cathepsin G (EC 3.4.21.20) (Vimentin-specific protease) (VSP)	1.40811	0.327769	0.891652	P28293
Q8VEE0	Combo-Control	0.324714	0.104978	3.09315	36	0.00381535	0.0299746	NA	0.24	0	2.41847	Rpe	RPE_MOUSE	Ribulose-phosphate 3-epimerase (EC 5.1.3.1) (Ribulose-5-phosphate-epimerase)	2.41847	0.324714	1.52325	Q8VEE0
Q9D2R6	Combo-Control	0.324613	0.181769	1.78586	36	0.0825485	0.205873	NA	0.18	0	1.08329	Coa3 Ccdc56	COA3_MOUSE	Cytochrome c oxidase assembly factor 3 homolog, mitochondrial (Coiled-coil domain-containing protein 56)	1.08329	0.324613	0.6864	Q9D2R6
P14152	Combo-Control	0.323978	0.124907	2.59375	36	0.0136424	0.0657437	NA	0.84127	0	1.86511	Mdh1 Mor2	MDHC_MOUSE	Malate dehydrogenase, cytoplasmic (EC 1.1.1.37) (Cytosolic malate dehydrogenase)	1.86511	0.323978	1.18215	P14152
Q9D3P8	Combo-Control	0.323931	0.131993	2.45415	36	0.0190904	0.0816657	NA	0	0	1.71918	Plgrkt	PLRKT_MOUSE	Plasminogen receptor (KT) (Plg-R(KT))	1.71918	0.323931	1.08796	Q9D3P8
Q9QXL1	Combo-Control	0.323795	0.201651	1.60572	36	0.117074	0.259997	NA	0	0	0.931541	Kif21b Kif6	KI21B_MOUSE	Kinesin-like protein KIF21B (Kinesin-like protein KIF6)	0.931541	0.323795	0.585032	Q9QXL1
Q6PCM2	Combo-Control	0.323446	0.280577	1.15279	6	0.292846	0.472056	NA	0.7	0	0.533361	Ints6 Dbi1 Ddx26	INT6_MOUSE	Integrator complex subunit 6 (Int6) (DBI-1) (Protein DDX26)	0.533361	0.323446	0.326007	Q6PCM2
Q6R891	Combo-Control	0.323237	0.0972654	3.32325	36	0.002052	0.0206723	NA	0.233333	0	2.68782	Ppp1r9b	NEB2_MOUSE	Neurabin-2 (Neurabin-II) (Protein phosphatase 1 regulatory subunit 9B) (Spinophilin)	2.68782	0.323237	1.68461	Q6R891
Q64735	Combo-Control	0.322871	0.469553	0.687613	11	0.505936	0.67262	NA	0.583333	0	0.295904	Cr1l Crry Cry	CR1L_MOUSE	Complement component receptor 1-like protein (Complement regulatory protein Crry) (Protein p65)	0.295904	0.322871	0.17223	Q64735
P52430	Combo-Control	0.320991	0.173996	1.84482	36	0.073304	0.190694	NA	0.0666667	0	1.13487	Pon1 Pon	PON1_MOUSE	Serum paraoxonase/arylesterase 1 (PON 1) (EC 3.1.1.2) (EC 3.1.1.81) (EC 3.1.8.1) (Aromatic esterase 1) (A-esterase 1) (Serum aryldialkylphosphatase 1)	1.13487	0.320991	0.719664	P52430
Q64339	Combo-Control	0.320323	0.0972689	3.29317	36	0.00222762	0.021542	NA	0.52381	0	2.65216	Isg15 G1p2 Ucrp	ISG15_MOUSE	Ubiquitin-like protein ISG15 (Interferon-induced 15 kDa protein) (Interferon-induced 17 kDa protein) (IP17) (Ubiquitin cross-reactive protein)	2.65216	0.320323	1.66671	Q64339
O35566	Combo-Control	0.31993	0.708324	0.451672	10	0.661143	0.791966	NA	0.683333	0	0.179704	Cd151 Peta3	CD151_MOUSE	CD151 antigen (GP27) (Membrane glycoprotein SFA-1) (Platelet-endothelial tetraspan antigen 3) (PETA-3) (CD antigen CD151)	0.179704	0.31993	0.101294	O35566
O35074	Combo-Control	0.319693	0.212724	1.50285	35	0.141847	0.295395	NA	0.2	0	0.848181	Ptgis Cyp8	PTGIS_MOUSE	Prostacyclin synthase (EC 5.3.99.4) (Prostaglandin I2 synthase)	0.848181	0.319693	0.529597	O35074
O08677	Combo-Control	0.317619	0.227833	1.39409	36	0.171837	0.335786	NA	0.867123	0	0.764883	Kng1 Kng	KNG1_MOUSE	Kininogen-1 [Cleaved into: Kininogen-1 heavy chain; Bradykinin; Kininogen-1 light chain]	0.764883	0.317619	0.473938	O08677
O70439	Combo-Control	0.317225	0.0700275	4.53	36	6.26e-05	0.00234286	NA	0.463889	0	4.20377	Stx7 Syn7	STX7_MOUSE	Syntaxin-7	4.20377	0.317225	2.63025	O70439
P35922	Combo-Control	0.316255	0.0949238	3.33167	36	0.00200524	0.0205833	NA	0.533333	0	2.69783	Fmr1 Fmr-1	FMR1_MOUSE	Synaptic functional regulator FMR1 (Fragile X mental retardation protein 1 homolog) (FMRP) (Protein FMR-1) (mFmr1p)	2.69783	0.316255	1.68648	P35922
P50429	Combo-Control	0.316002	0.106302	2.97267	36	0.00523809	0.0363409	NA	0.538889	0	2.28083	Arsb As1 As1-s	ARSB_MOUSE	Arylsulfatase B (ASB) (EC 3.1.6.12) (N-acetylgalactosamine-4-sulfatase) (G4S)	2.28083	0.316002	1.4396	P50429
Q9Z0P4	Combo-Control	0.31597	0.256559	1.23157	32	0.227085	0.401539	NA	0.375	0	0.643812	Palm	PALM_MOUSE	Paralemmin-1 (Paralemmin)	0.643812	0.31597	0.396273	Q9Z0P4
Q99JY4	Combo-Control	0.315704	0.405245	0.779045	7	0.461473	0.634891	NA	0.75	0	0.335854	Trabd	TRABD_MOUSE	TraB domain-containing protein	0.335854	0.315704	0.197301	Q99JY4
Q8BYC6	Combo-Control	0.315504	0.168467	1.8728	31	0.0705541	0.186002	NA	0.4	0	1.15148	Taok3	TAOK3_MOUSE	Serine/threonine-protein kinase TAO3 (EC 2.7.11.1) (Thousand and one amino acid protein 3)	1.15148	0.315504	0.730482	Q8BYC6
O55091	Combo-Control	0.314325	0.125755	2.4995	33	0.0175874	0.0770579	NA	0.56	0	1.7548	Impact	IMPCT_MOUSE	Protein IMPACT (Imprinted and ancient gene protein)	1.7548	0.314325	1.11318	O55091
Q99KC8	Combo-Control	0.313972	0.0790556	3.97154	36	0.000327571	0.00670415	NA	0.929577	0	3.4847	Vwa5a Loh11cr2a	VMA5A_MOUSE	von Willebrand factor A domain-containing protein 5A (Loss of heterozygosity 11 chromosomal region 2 gene A protein homolog)	3.4847	0.313972	2.17366	Q99KC8
Q3URE1	Combo-Control	0.313482	1.07596	0.291351	1	0.819516	0.897681	NA	0.92	0	0.0864423	Acsf3	ACSF3_MOUSE	Malonate--CoA ligase ACSF3, mitochondrial (EC 6.2.1.n3) (Acyl-CoA synthetase family member 3)	0.0864423	0.313482	0.0468778	Q3URE1
Q9DBB9	Combo-Control	0.313215	0.211378	1.48178	36	0.147101	0.303715	NA	0.4125	0	0.832385	Cpn2	CPN2_MOUSE	Carboxypeptidase N subunit 2 (Carboxypeptidase N 83 kDa chain) (Carboxypeptidase N large subunit) (Carboxypeptidase N polypeptide 2) (Carboxypeptidase N regulatory subunit)	0.832385	0.313215	0.517534	Q9DBB9
Q99K51	Combo-Control	0.312351	0.166135	1.88011	36	0.0682048	0.18181	NA	0.932422	0	1.16619	Pls3	PLST_MOUSE	Plastin-3 (T-plastin)	1.16619	0.312351	0.740382	Q99K51
P16110	Combo-Control	0.312187	0.125535	2.48686	36	0.0176605	0.0771447	NA	0.866667	0	1.753	Lgals3	LEG3_MOUSE	Galectin-3 (Gal-3) (35 kDa lectin) (Carbohydrate-binding protein 35) (CBP 35) (Galactose-specific lectin 3) (IgE-binding protein) (L-34 galactoside-binding lectin) (Laminin-binding protein) (Lectin L-29) (Mac-2 antigen)	1.753	0.312187	1.11269	P16110
O08692	Combo-Control	0.311556	0.190487	1.63558	36	0.110643	0.250867	NA	0.879518	0	0.956077	Ngp	NGP_MOUSE	Neutrophilic granule protein (NGP) (Cystatin-like protein) (Myeloid bactenecin protein) (Myeloid secondary granule protein)	0.956077	0.311556	0.600556	O08692
P10630	Combo-Control	0.311342	0.109983	2.83082	36	0.00755039	0.0451595	NA	0.11875	0	2.12203	Eif4a2 Ddx2b	IF4A2_MOUSE	Eukaryotic initiation factor 4A-II (eIF-4A-II) (eIF4A-II) (EC 3.6.4.13) (ATP-dependent RNA helicase eIF4A-2)	2.12203	0.311342	1.34525	P10630
O88322	Combo-Control	0.309963	0.124637	2.48692	36	0.0176577	0.0771447	NA	0.853333	0	1.75307	Nid2	NID2_MOUSE	Nidogen-2 (NID-2) (Entactin-2)	1.75307	0.309963	1.11269	O88322
Q8K354	Combo-Control	0.309956	0.103502	2.99468	36	0.0049455	0.0352022	NA	0.358333	0	2.30579	Cbr3	CBR3_MOUSE	Carbonyl reductase [NADPH] 3 (EC 1.1.1.184) (NADPH-dependent carbonyl reductase 3)	2.30579	0.309956	1.45343	Q8K354
Q923B6	Combo-Control	0.309945	0.246712	1.2563	36	0.217098	0.388237	NA	0.316667	0	0.663344	Steap4 Tiarp	STEA4_MOUSE	Metalloreductase STEAP4 (EC 1.16.1.9) (Dudulin-4) (Six-transmembrane epithelial antigen of prostate 4) (Tumor necrosis factor-alpha-induced adipose-related protein)	0.663344	0.309945	0.410903	Q923B6
P01837	Combo-Control	0.309908	0.216056	1.43439	36	0.160091	0.319741	NA	0.473684	0	0.795632	Igkc	IGKC_MOUSE	Immunoglobulin kappa constant (Ig kappa chain C region MOPC 21)	0.795632	0.309908	0.495202	P01837
A2AAJ9	Combo-Control	0.309827	0.581781	0.53255	24	0.599242	0.74789	NA	0.25	0	0.222398	Obscn Gm878	OBSCN_MOUSE	Obscurin (EC 2.7.11.1) (Obscurin-RhoGEF) (Obscurin-myosin light chain kinase) (Obscurin-MLCK)	0.222398	0.309827	0.126163	A2AAJ9
Q8R0F3	Combo-Control	0.309039	0.140505	2.19949	36	0.0343494	0.118746	NA	0.35	0	1.46408	Sumf1 Fge	SUMF1_MOUSE	Formylglycine-generating enzyme (FGE) (EC 1.8.3.7) (C-alpha-formylglycine-generating enzyme 1) (Sulfatase-modifying factor 1)	1.46408	0.309039	0.925381	Q8R0F3
P21180	Combo-Control	0.307331	0.545691	0.563197	8	0.588733	0.740117	NA	0.7	0	0.230082	C2	CO2_MOUSE	Complement C2 (EC 3.4.21.43) (C3/C5 convertase) [Cleaved into: Complement C2b fragment; Complement C2a fragment]	0.230082	0.307331	0.130699	P21180
Q9WVJ3	Combo-Control	0.305568	0.0975662	3.1319	36	0.0034415	0.0282833	NA	0.718571	0	2.46325	Cpq Hls2 Pgcp	CBPQ_MOUSE	Carboxypeptidase Q (EC 3.4.17.-) (Hematopoietic lineage switch 2) (Plasma glutamate carboxypeptidase)	2.46325	0.305568	1.54847	Q9WVJ3
Q8C5L6	Combo-Control	0.30551	0.158677	1.92536	28	0.0643964	0.175413	NA	0.15	0	1.19114	Inpp5k Pps Skip	INP5K_MOUSE	Inositol polyphosphate 5-phosphatase K (EC 3.1.3.56) (Phosphatidylinositol-3,4,5-trisphosphate 5-phosphatase) (EC 3.1.3.86) (Phosphatidylinositol-4,5-bisphosphate 5-phosphatase) (EC 3.1.3.36) (Skeletal muscle and kidney-enriched inositol phosphatase)	1.19114	0.30551	0.755937	Q8C5L6
Q9D8C4	Combo-Control	0.305164	0.0848379	3.59703	36	0.000958956	0.0124061	NA	0.758537	0	3.0182	Ifi35	IN35_MOUSE	Interferon-induced 35 kDa protein homolog (IFP 35) (Ifi-35)	3.0182	0.305164	1.90636	Q9D8C4
P11404	Combo-Control	0.303977	0.770973	0.394277	29	0.696261	0.817128	NA	0.116667	0	0.157228	Fabp3 Fabph1	FABPH_MOUSE	Fatty acid-binding protein, heart (Fatty acid-binding protein 3) (Heart-type fatty acid-binding protein) (H-FABP) (Mammary-derived growth inhibitor) (MDGI)	0.157228	0.303977	0.0877097	P11404
Q9DBE0	Combo-Control	0.303541	0.110074	2.7576	36	0.00908845	0.0508531	NA	0.0166667	0	2.04151	Csad	CSAD_MOUSE	Cysteine sulfinic acid decarboxylase (EC 4.1.1.29) (Aspartate 1-decarboxylase) (EC 4.1.1.11) (Cysteine-sulfinate decarboxylase) (Sulfinoalanine decarboxylase)	2.04151	0.303541	1.29368	Q9DBE0
Q9CQR4	Combo-Control	0.302765	0.102876	2.943	36	0.0056582	0.0376808	NA	0.292857	0	2.24732	Acot13 Them2	ACO13_MOUSE	Acyl-coenzyme A thioesterase 13 (Acyl-CoA thioesterase 13) (EC 3.1.2.-) (Thioesterase superfamily member 2)	2.24732	0.302765	1.42388	Q9CQR4
Q9D3G5	Combo-Control	0.302192	0.15522	1.94687	32	0.060373	0.169013	NA	0.4	0	1.21916	Stx11	STX11_MOUSE	Syntaxin-11	1.21916	0.302192	0.772079	Q9D3G5
Q62393	Combo-Control	0.301478	0.0799522	3.77073	36	0.00058523	0.00917353	NA	0.711765	0	3.23267	Tpd52	TPD52_MOUSE	Tumor protein D52 (mD52)	3.23267	0.301478	2.03746	Q62393
Q06890	Combo-Control	0.300958	0.142105	2.11786	36	0.0411594	0.132087	NA	0.873973	0	1.38553	Clu Apoj Msgp-2	CLUS_MOUSE	Clusterin (Apolipoprotein J) (Apo-J) (Clustrin) (Sulfated glycoprotein 2) (SGP-2) [Cleaved into: Clusterin beta chain; Clusterin alpha chain]	1.38553	0.300958	0.879139	Q06890
P39039	Combo-Control	0.300007	0.243125	1.23396	34	0.22568	0.400123	NA	0.05	0	0.646507	Mbl1	MBL1_MOUSE	Mannose-binding protein A (MBP-A) (Mannan-binding protein) (Ra-reactive factor polysaccharide-binding component p28B) (RaRF p28B)	0.646507	0.300007	0.397806	P39039
P01897	Combo-Control	0.299872	0.143585	2.08846	36	0.0438898	0.137994	NA	0.846154	0	1.35764	H2-L	HA1L_MOUSE	H-2 class I histocompatibility antigen, L-D alpha chain	1.35764	0.299872	0.86014	P01897
A2ASQ1	Combo-Control	0.299718	0.11171	2.68302	36	0.0109509	0.0573569	NA	0.611111	0	1.96055	Agrn Agrin	AGRIN_MOUSE	Agrin [Cleaved into: Agrin N-terminal 110 kDa subunit; Agrin C-terminal 110 kDa subunit; Agrin C-terminal 90 kDa fragment (C90); Agrin C-terminal 22 kDa fragment (C22)]	1.96055	0.299718	1.24141	A2ASQ1
Q61823	Combo-Control	0.297699	0.116713	2.5507	36	0.0151472	0.0701162	NA	0.4	0	1.81967	Pdcd4 Ma3 Tis	PDCD4_MOUSE	Programmed cell death protein 4 (Protein MA-3) (Topoisomerase-inhibitor suppressed protein)	1.81967	0.297699	1.15418	Q61823
P28650	Combo-Control	0.29757	0.19071	1.56033	36	0.127431	0.274322	NA	0.8375	0	0.894724	Adss1 Adssl1	PURA1_MOUSE	Adenylosuccinate synthetase isozyme 1 (AMPSase 1) (AdSS 1) (EC 6.3.4.4) (Adenylosuccinate synthetase like 1) (Adenylosuccinate synthetase, basic isozyme) (Adenylosuccinate synthetase, muscle isozyme) (M-type adenylosuccinate synthetase) (IMP--aspartate ligase 1)	0.894724	0.29757	0.56174	P28650
Q80VP1	Combo-Control	0.297251	0.102486	2.9004	35	0.00640092	0.04073	NA	0.15	0	2.19376	Epn1	EPN1_MOUSE	Epsin-1 (EPS-15-interacting protein 1) (Intersectin-EH-binding protein 1) (Ibp1)	2.19376	0.297251	1.39009	Q80VP1
O89051	Combo-Control	0.297221	0.129005	2.30394	36	0.0271072	0.101036	NA	0.07	0	1.56692	Itm2b	ITM2B_MOUSE	Integral membrane protein 2B (Immature BRI2) (imBRI2) (Protein E25B) (Transmembrane protein BRI) (Bri) [Cleaved into: BRI2, membrane form (Mature BRI2) (mBRI2); BRI2 intracellular domain (BRI2 ICD); BRI2C, soluble form; Bri23 peptide (Bri2-23) (ABri23) (C-terminal peptide) (P23 peptide)]	1.56692	0.297221	0.995526	O89051
O89020	Combo-Control	0.296731	0.245926	1.20659	36	0.235461	0.411764	NA	0.748718	0	0.628081	Afm	AFAM_MOUSE	Afamin (Alpha-albumin) (Alpha-Alb)	0.628081	0.296731	0.385352	O89020
O54782	Combo-Control	0.296391	0.0824112	3.59649	36	0.000960396	0.0124061	NA	0.456667	0	3.01755	Man2b2 Kiaa0935	MA2B2_MOUSE	Epididymis-specific alpha-mannosidase (EC 3.2.1.24) (Mannosidase alpha class 2B member 2)	3.01755	0.296391	1.90636	O54782
Q3TMW1	Combo-Control	0.296329	0.51965	0.570248	18	0.575559	0.728594	NA	0.55	0	0.23991	Ccdc102a	C102A_MOUSE	Coiled-coil domain-containing protein 102A	0.23991	0.296329	0.137515	Q3TMW1
P17563	Combo-Control	0.294819	0.102446	2.8778	36	0.00669537	0.0418756	NA	0.505	0	2.17423	Selenbp1 Lpsb	SBP1_MOUSE	Methanethiol oxidase (MTO) (EC 1.8.3.4) (56 kDa selenium-binding protein) (SBP56) (SP56) (Selenium-binding protein 1)	2.17423	0.294819	1.37804	P17563
P58774	Combo-Control	0.294343	0.262505	1.12128	36	0.269591	0.447463	NA	0.95283	0	0.569295	Tpm2 Tpm-2	TPM2_MOUSE	Tropomyosin beta chain (Beta-tropomyosin) (Tropomyosin-2)	0.569295	0.294343	0.349243	P58774
Q8K215	Combo-Control	0.294177	0.63881	0.460508	6	0.66137	0.791966	NA	0.8	0	0.179556	Lyrm4 Isd11	LYRM4_MOUSE	LYR motif-containing protein 4	0.179556	0.294177	0.101294	Q8K215
Q6ZPZ3	Combo-Control	0.293452	0.156469	1.87546	36	0.0688578	0.183006	NA	0.225	0	1.16205	Zc3h4 Kiaa1064	ZC3H4_MOUSE	Zinc finger CCCH domain-containing protein 4	1.16205	0.293452	0.737535	Q6ZPZ3
Q04447	Combo-Control	0.292719	0.136112	2.15057	36	0.038299	0.126749	NA	0.853125	0	1.41681	Ckb Ckbb	KCRB_MOUSE	Creatine kinase B-type (EC 2.7.3.2) (B-CK) (Creatine kinase B chain) (Creatine phosphokinase B-type) (CPK-B)	1.41681	0.292719	0.897057	Q04447
P28665	Combo-Control	0.292379	0.201711	1.44949	36	0.155857	0.314672	NA	0.930282	0	0.807274	Mug1 Mug-1	MUG1_MOUSE	Murinoglobulin-1 (MuG1)	0.807274	0.292379	0.502142	P28665
Q9CXG3	Combo-Control	0.292285	0.499756	0.584856	7	0.577002	0.729569	NA	0.8	0	0.238823	Ppil4	PPIL4_MOUSE	Peptidyl-prolyl cis-trans isomerase-like 4 (PPIase) (EC 5.2.1.8) (Cyclophilin-like protein PPIL4) (Rotamase PPIL4)	0.238823	0.292285	0.136934	Q9CXG3
Q06138	Combo-Control	0.29167	0.287993	1.01277	36	0.31793	0.498358	NA	0	0	0.497669	Cab39 Mo25	CAB39_MOUSE	Calcium-binding protein 39 (MO25alpha) (Protein Mo25)	0.497669	0.29167	0.302459	Q06138
Q8K1X4	Combo-Control	0.291009	0.139684	2.08333	36	0.0443827	0.138521	NA	0.458824	0	1.35279	Nckap1l Hem1	NCKPL_MOUSE	Nck-associated protein 1-like (Hematopoietic protein 1)	1.35279	0.291009	0.858485	Q8K1X4
P56213	Combo-Control	0.29083	0.197316	1.47393	32	0.15027	0.307318	NA	0.116667	0	0.823127	Gfer Alr MNCb-0663	ALR_MOUSE	FAD-linked sulfhydryl oxidase ALR (EC 1.8.3.2) (Augmenter of liver regeneration)	0.823127	0.29083	0.512412	P56213
P97369	Combo-Control	0.290549	0.0931199	3.12017	36	0.00355086	0.0288184	NA	0.768056	0	2.44967	Ncf4	NCF4_MOUSE	Neutrophil cytosol factor 4 (NCF-4) (Neutrophil NADPH oxidase factor 4) (p40-phox) (p40phox)	2.44967	0.290549	1.54033	P97369
P58242	Combo-Control	0.290507	0.123309	2.35593	36	0.0240413	0.0945538	NA	0.216667	0	1.61904	Smpdl3b Asml3b	ASM3B_MOUSE	Acid sphingomyelinase-like phosphodiesterase 3b (ASM-like phosphodiesterase 3b) (EC 3.1.4.-)	1.61904	0.290507	1.02432	P58242
O70469	Combo-Control	0.289731	0.128843	2.24871	33	0.0313278	0.112479	NA	0.1	0	1.50407	Dok2 Frip	DOK2_MOUSE	Docking protein 2 (Dok-related protein) (Dok-R) (Downstream of tyrosine kinase 2) (IL-four receptor-interacting protein) (FRIP) (p56(dok-2))	1.50407	0.289731	0.948929	O70469
Q80TY0	Combo-Control	0.289659	0.0848757	3.41275	36	0.0016043	0.0175463	NA	0.166667	0	2.79471	Fnbp1 Fbp17 Kiaa0554	FNBP1_MOUSE	Formin-binding protein 1 (Formin-binding protein 17)	2.79471	0.289659	1.75582	Q80TY0
P01887	Combo-Control	0.289657	0.125446	2.30901	36	0.0267933	0.10055	NA	0.589583	0	1.57197	B2m	B2MG_MOUSE	Beta-2-microglobulin	1.57197	0.289657	0.997617	P01887
P31786	Combo-Control	0.28915	0.141381	2.04518	36	0.0481997	0.145884	NA	0.836885	0	1.31696	Dbi	ACBP_MOUSE	Acyl-CoA-binding protein (ACBP) (Diazepam-binding inhibitor) (DBI) (Endozepine) (EP)	1.31696	0.28915	0.835991	P31786
P00329	Combo-Control	0.288946	0.297002	0.972876	36	0.337107	0.518314	NA	0.325	0	0.472232	Adh1 Adh-1	ADH1_MOUSE	Alcohol dehydrogenase 1 (EC 1.1.1.1) (ADH-A2) (Alcohol dehydrogenase A subunit)	0.472232	0.288946	0.285407	P00329
Q920A5	Combo-Control	0.28871	0.150679	1.91606	36	0.063325	0.173678	NA	0.5525	0	1.19842	Scpep1 Risc	RISC_MOUSE	Retinoid-inducible serine carboxypeptidase (EC 3.4.16.-) (Serine carboxypeptidase 1)	1.19842	0.28871	0.760256	Q920A5
Q8BPU7	Combo-Control	0.288374	0.0874392	3.298	36	0.00219848	0.0214248	NA	0.733929	0	2.65788	Elmo1	ELMO1_MOUSE	Engulfment and cell motility protein 1 (Protein ced-12 homolog)	2.65788	0.288374	1.66908	Q8BPU7
Q3TCN2	Combo-Control	0.288347	0.106074	2.71836	36	0.0100283	0.0540984	NA	0.315	0	1.99877	Plbd2	PLBL2_MOUSE	Putative phospholipase B-like 2 (EC 3.1.1.-) (66.3 kDa protein) (76 kDa protein) (p76) (LAMA-like protein 2) (Lamina ancestor homolog 2) (Phospholipase B domain-containing protein 2) [Cleaved into: Putative phospholipase B-like 2 28 kDa form; Putative phospholipase B-like 2 40 kDa form; Putative phospholipase B-like 2 15 kDa form]	1.99877	0.288347	1.26682	Q3TCN2
Q9WV35	Combo-Control	0.287997	0.509556	0.565191	23	0.577416	0.729669	NA	0.774	0	0.238511	Apobec2	ABEC2_MOUSE	C->U-editing enzyme APOBEC-2 (EC 3.5.4.36) (mRNA(cytosine(6666)) deaminase 2)	0.238511	0.287997	0.136874	Q9WV35
P46414	Combo-Control	0.287764	0.113195	2.5422	36	0.0154617	0.070967	NA	0	0	1.81074	Cdkn1b	CDN1B_MOUSE	Cyclin-dependent kinase inhibitor 1B (Cyclin-dependent kinase inhibitor p27) (p27Kip1)	1.81074	0.287764	1.14894	P46414
Q91WG2	Combo-Control	0.2867	0.0799268	3.58704	36	0.000986327	0.0125486	NA	0.669565	0	3.00598	Rabep2 Rabpt5b	RABE2_MOUSE	Rab GTPase-binding effector protein 2 (Rabaptin-5beta)	3.00598	0.2867	1.90141	Q91WG2
Q9QUK4	Combo-Control	0.286263	0.213575	1.34034	28	0.19091	0.357298	NA	0.5	0	0.719171	Naip2 Birc1b Naip-rs6	BIR1B_MOUSE	Baculoviral IAP repeat-containing protein 1b (Neuronal apoptosis inhibitory protein 2)	0.719171	0.286263	0.44697	Q9QUK4
Q8CI59	Combo-Control	0.28626	0.148653	1.9257	36	0.0620691	0.172097	NA	0.535714	0	1.20712	Steap3 Tsap6	STEA3_MOUSE	Metalloreductase STEAP3 (EC 1.16.1.-) (Dudulin-2) (Protein nm1054) (Six-transmembrane epithelial antigen of prostate 3) (Tumor suppressor-activated pathway protein 6)	1.20712	0.28626	0.764227	Q8CI59
P48025	Combo-Control	0.285412	0.126388	2.25823	36	0.030089	0.108797	NA	0.691667	0	1.52159	Syk ptk72 Sykb	KSYK_MOUSE	Tyrosine-protein kinase SYK (EC 2.7.10.2) (Spleen tyrosine kinase)	1.52159	0.285412	0.963382	P48025
Q8R5M8	Combo-Control	0.285336	0.213713	1.33514	24	0.194357	0.360487	NA	0.583333	0	0.711399	Cadm1 Igsf4 Necl2 Ra175 Syncam SynCam1 Tslc1	CADM1_MOUSE	Cell adhesion molecule 1 (Immunoglobulin superfamily member 4) (IgSF4) (Nectin-like protein 2) (NECL-2) (Spermatogenic immunoglobulin superfamily) (SgIgSF) (Synaptic cell adhesion molecule) (SynCAM) (Tumor suppressor in lung cancer 1) (TSLC-1)	0.711399	0.285336	0.44311	Q8R5M8
Q6P8M1	Combo-Control	0.285307	0.208389	1.36911	15	0.191118	0.357533	NA	0.5	0	0.718699	Tatdn1	TATD1_MOUSE	Putative deoxyribonuclease TATDN1 (EC 3.1.21.-)	0.718699	0.285307	0.446684	Q6P8M1
Q8CBE3	Combo-Control	0.285006	0.0837093	3.40471	36	0.00164031	0.0178502	NA	0.22	0	2.78507	Wdr37 Kiaa0982	WDR37_MOUSE	WD repeat-containing protein 37	2.78507	0.285006	1.74836	Q8CBE3
Q9JHJ3	Combo-Control	0.284272	0.0836378	3.39884	36	0.00166711	0.017974	NA	0.0142857	0	2.77804	Glmp	GLMP_MOUSE	Glycosylated lysosomal membrane protein (Lysosomal protein NCU-G1)	2.77804	0.284272	1.74535	Q9JHJ3
P14430	Combo-Control	0.283284	0.134945	2.09925	36	0.0428698	0.135561	NA	0.476316	0	1.36785	H2-Q8	HA18_MOUSE	H-2 class I histocompatibility antigen, Q8 alpha chain	1.36785	0.283284	0.867867	P14430
Q62048	Combo-Control	0.283168	0.107956	2.62299	36	0.0127001	0.0629496	NA	0.208333	0	1.89619	Pea15 Pea15a	PEA15_MOUSE	Astrocytic phosphoprotein PEA-15 (15 kDa phosphoprotein enriched in astrocytes)	1.89619	0.283168	1.20101	Q62048
Q9ESY9	Combo-Control	0.282574	0.166753	1.69456	36	0.098794	0.23302	NA	0.3	0	1.00527	Ifi30 Gilt Ip30	GILT_MOUSE	Gamma-interferon-inducible lysosomal thiol reductase (EC 1.8.-.-) (Gamma-interferon-inducible protein IP-30) (Lysosomal thiol reductase IP30)	1.00527	0.282574	0.632608	Q9ESY9
Q99KX1	Combo-Control	0.282267	0.207251	1.36196	16	0.19208	0.358021	NA	0.4	0	0.716517	Mlf2	MLF2_MOUSE	Myeloid leukemia factor 2 (Myelodysplasia-myeloid leukemia factor 2)	0.716517	0.282267	0.446091	Q99KX1
Q9CYL5	Combo-Control	0.282139	0.135754	2.07831	36	0.0448689	0.139557	NA	0.0214286	0	1.34805	Glipr2 Gapr1	GAPR1_MOUSE	Golgi-associated plant pathogenesis-related protein 1 (GAPR-1) (Golgi-associated PR-1 protein) (Glioma pathogenesis-related protein 2) (GliPR 2)	1.34805	0.282139	0.85525	Q9CYL5
Q91V64	Combo-Control	0.281169	0.132125	2.12806	36	0.0402484	0.130905	NA	0.671154	0	1.39525	Isoc1	ISOC1_MOUSE	Isochorismatase domain-containing protein 1	1.39525	0.281169	0.883043	Q91V64
Q61730	Combo-Control	0.280761	0.205711	1.36483	36	0.180776	0.34625	NA	0.375	0	0.74286	Il1rap	IL1AP_MOUSE	Interleukin-1 receptor accessory protein (IL-1 receptor accessory protein) (IL-1RAcP) (EC 3.2.2.6) (Interleukin-33 receptot beta chain)	0.74286	0.280761	0.46061	Q61730
Q99MN9	Combo-Control	0.280221	0.0794289	3.52794	36	0.00116438	0.0139276	NA	0.656522	0	2.93391	Pccb	PCCB_MOUSE	Propionyl-CoA carboxylase beta chain, mitochondrial (PCCase subunit beta) (EC 6.4.1.3) (Propanoyl-CoA:carbon dioxide ligase subunit beta)	2.93391	0.280221	1.85612	Q99MN9
P47879	Combo-Control	0.280115	0.16387	1.70937	34	0.0964956	0.228703	NA	0.25	0	1.01549	Igfbp4 Igfbp-4	IBP4_MOUSE	Insulin-like growth factor-binding protein 4 (IBP-4) (IGF-binding protein 4) (IGFBP-4)	1.01549	0.280115	0.640728	P47879
Q09014	Combo-Control	0.280058	0.112692	2.48516	36	0.0177321	0.0772243	NA	0.824324	0	1.75124	Ncf1	NCF1_MOUSE	Neutrophil cytosol factor 1 (NCF-1) (47 kDa neutrophil oxidase factor) (NCF-47K) (Neutrophil NADPH oxidase factor 1) (p47-phox)	1.75124	0.280058	1.11225	Q09014
Q7TNG5	Combo-Control	0.279486	0.0911182	3.06729	36	0.00408578	0.0312883	NA	0.825	0	2.38873	Eml2	EMAL2_MOUSE	Echinoderm microtubule-associated protein-like 2 (EMAP-2)	2.38873	0.279486	1.50462	Q7TNG5
P29788	Combo-Control	0.278189	0.182925	1.52078	36	0.137049	0.289712	NA	0.79898	0	0.863123	Vtn	VTNC_MOUSE	Vitronectin (VN) (S-protein) (Serum-spreading factor)	0.863123	0.278189	0.538033	P29788
Q9CWZ7	Combo-Control	0.277746	0.0696531	3.98756	36	0.000312624	0.00652602	NA	0.35	0	3.50498	Napg Snapg	SNAG_MOUSE	Gamma-soluble NSF attachment protein (SNAP-gamma) (N-ethylmaleimide-sensitive factor attachment protein gamma)	3.50498	0.277746	2.18535	Q9CWZ7
P25911	Combo-Control	0.277732	0.0948655	2.92764	36	0.00588798	0.0386188	NA	0.646154	0	2.23003	Lyn	LYN_MOUSE	Tyrosine-protein kinase Lyn (EC 2.7.10.2) (V-yes-1 Yamaguchi sarcoma viral related oncogene homolog) (p53Lyn) (p56Lyn)	2.23003	0.277732	1.4132	P25911
Q3UHQ6	Combo-Control	0.276859	0.346098	0.799943	27	0.430726	0.607015	NA	0.2	0	0.365799	Dop1b Dopey2 Kiaa0933	DOP2_MOUSE	Protein dopey-2	0.365799	0.276859	0.216801	Q3UHQ6
P01027	Combo-Control	0.276669	0.149618	1.84916	36	0.0726589	0.189758	NA	0.972603	0	1.13871	C3	CO3_MOUSE	Complement C3 (HSE-MSF) [Cleaved into: Complement C3 beta chain; C3-beta-c (C3bc); Complement C3 alpha chain; C3a anaphylatoxin; Acylation stimulating protein (ASP) (C3adesArg); Complement C3b alpha' chain; Complement C3c alpha' chain fragment 1; Complement C3dg fragment; Complement C3g fragment; Complement C3d fragment; Complement C3f fragment; Complement C3c alpha' chain fragment 2]	1.13871	0.276669	0.7218	P01027
Q5SUA5	Combo-Control	0.276546	0.0841926	3.28468	35	0.00232417	0.022034	NA	0.781818	0	2.63373	Myo1g	MYO1G_MOUSE	Unconventional myosin-Ig	2.63373	0.276546	1.65691	Q5SUA5
Q9CQE5	Combo-Control	0.276016	0.153761	1.79509	36	0.0810381	0.203157	NA	0.275	0	1.09131	Rgs10	RGS10_MOUSE	Regulator of G-protein signaling 10 (RGS10)	1.09131	0.276016	0.692169	Q9CQE5
P01872	Combo-Control	0.27569	0.171353	1.6089	36	0.116374	0.259793	NA	0.875625	0	0.934143	Ighm Igh-6	IGHM_MOUSE	Immunoglobulin heavy constant mu [Cleaved into: Mu' chain (55 kDa mu' chain)]	0.934143	0.27569	0.585373	P01872
Q9EQH2	Combo-Control	0.275149	0.101079	2.72211	36	0.00993466	0.0539427	NA	0.855072	0	2.00285	Erap1 Appils Arts1	ERAP1_MOUSE	Endoplasmic reticulum aminopeptidase 1 (EC 3.4.11.-) (ARTS-1) (Adipocyte-derived leucine aminopeptidase) (A-LAP) (Aminopeptidase PILS) (Puromycin-insensitive leucyl-specific aminopeptidase) (PILS-AP) (VEGF-induced aminopeptidase)	2.00285	0.275149	1.26807	Q9EQH2
Q8R3C6	Combo-Control	0.27464	0.200089	1.37259	36	0.178371	0.342997	NA	0.45	0	0.748675	Rbm19	RBM19_MOUSE	Probable RNA-binding protein 19 (RNA-binding motif protein 19)	0.748675	0.27464	0.46471	Q8R3C6
P97927	Combo-Control	0.274571	0.116455	2.35774	36	0.0239406	0.0943757	NA	0.841667	0	1.62086	Lama4	LAMA4_MOUSE	Laminin subunit alpha-4 (Laminin-14 subunit alpha) (Laminin-8 subunit alpha) (Laminin-9 subunit alpha)	1.62086	0.274571	1.02514	P97927
Q9QXT0	Combo-Control	0.274386	0.109551	2.50465	36	0.0169242	0.0749271	NA	0.782609	0	1.77149	Cnpy2 Msap Tmem4 Zsig9	CNPY2_MOUSE	Protein canopy homolog 2 (MIR-interacting saposin-like protein) (Putative secreted protein ZSIG9) (Transmembrane protein 4)	1.77149	0.274386	1.12536	Q9QXT0
Q6PDN3	Combo-Control	0.274326	0.108144	2.53666	35	0.0158058	0.0720888	NA	0.26875	0	1.80118	Mylk	MYLK_MOUSE	Myosin light chain kinase, smooth muscle (MLCK) (smMLCK) (EC 2.7.11.18) (Kinase-related protein) (KRP) (Telokin) [Cleaved into: Myosin light chain kinase, smooth muscle, deglutamylated form]	1.80118	0.274326	1.14213	Q6PDN3
Q9QYX7	Combo-Control	0.274215	0.285002	0.962153	22	0.34643	0.527019	NA	0.45	0	0.460385	Pclo Acz	PCLO_MOUSE	Protein piccolo (Aczonin) (Brain-derived HLMN protein) (Multidomain presynaptic cytomatrix protein)	0.460385	0.274215	0.278174	Q9QYX7
Q9Z2E1	Combo-Control	0.274127	0.0836951	3.27531	35	0.00238384	0.022404	NA	0.591667	0	2.62272	Mbd2	MBD2_MOUSE	Methyl-CpG-binding domain protein 2 (Methyl-CpG-binding protein MBD2)	2.62272	0.274127	1.64968	Q9Z2E1
B2RUP2	Combo-Control	0.274079	0.16292	1.68229	35	0.101415	0.237256	NA	0.540909	0	0.993897	Unc13d	UN13D_MOUSE	Protein unc-13 homolog D (Munc13-4)	0.993897	0.274079	0.624783	B2RUP2
Q8VDP3	Combo-Control	0.274052	0.294	0.932147	9	0.375589	0.5564	NA	0.7	0	0.425287	Mical1 Mical Nical	MICA1_MOUSE	[F-actin]-monooxygenase MICAL1 (EC 1.14.13.225) (Molecule interacting with CasL protein 1) (MICAL-1) (mMical1) (NEDD9-interacting protein with calponin homology and LIM domains)	0.425287	0.274052	0.254613	Q8VDP3
P35700	Combo-Control	0.272191	0.115859	2.34934	36	0.0244121	0.0954275	NA	0.951691	0	1.61239	Prdx1 Msp23 Paga Tdpx2	PRDX1_MOUSE	Peroxiredoxin-1 (EC 1.11.1.15) (Macrophage 23 kDa stress protein) (Osteoblast-specific factor 3) (OSF-3) (Thioredoxin peroxidase 2) (Thioredoxin-dependent peroxide reductase 2)	1.61239	0.272191	1.02033	P35700
Q3UZ39	Combo-Control	0.272074	0.0824472	3.29998	36	0.00218666	0.0214248	NA	0.868868	0	2.66022	Lrrfip1 Flap	LRRF1_MOUSE	Leucine-rich repeat flightless-interacting protein 1 (LRR FLII-interacting protein 1) (FLI-LRR-associated protein 1) (Flap-1) (H186 FLAP)	2.66022	0.272074	1.66908	Q3UZ39
Q8VE18	Combo-Control	0.271328	0.514101	0.527772	4	0.625578	0.766655	NA	0.85	0	0.203719	Smg8	SMG8_MOUSE	Protein SMG8 (Protein smg-8 homolog)	0.203719	0.271328	0.1154	Q8VE18
P16879	Combo-Control	0.270749	0.106007	2.55406	36	0.0150243	0.0697395	NA	0.2	0	1.82321	Fes Fps	FES_MOUSE	Tyrosine-protein kinase Fes/Fps (EC 2.7.10.2) (Proto-oncogene c-Fes)	1.82321	0.270749	1.15652	P16879
Q924T7	Combo-Control	0.270672	0.144934	1.86756	33	0.0707271	0.186345	NA	0.325	0	1.15041	Rnf31 Paul	RNF31_MOUSE	E3 ubiquitin-protein ligase RNF31 (EC 2.3.2.31) (HOIL-1-interacting protein) (HOIP) (Putative Ariadne-like ubiquitin ligase) (PAUL) (RING finger protein 31) (RING-type E3 ubiquitin transferase RNF31)	1.15041	0.270672	0.729682	Q924T7
Q8VDK1	Combo-Control	0.270214	0.374262	0.721991	11	0.485365	0.65545	NA	0.758333	0	0.313931	Nit1	NIT1_MOUSE	Deaminated glutathione amidase (dGSH amidase) (EC 3.5.1.128) (Nitrilase homolog 1)	0.313931	0.270214	0.18346	Q8VDK1
P51437	Combo-Control	0.269932	0.157616	1.71259	36	0.0953899	0.22695	NA	0.52381	0	1.0205	Camp Cnlp Cramp	CAMP_MOUSE	Cathelicidin antimicrobial peptide (Cathelin-like protein) (CLP) [Cleaved into: Cathelin-related antimicrobial peptide (Cramp)]	1.0205	0.269932	0.644071	P51437
Q921T2	Combo-Control	0.269648	0.108897	2.47617	36	0.0181166	0.0784269	NA	0.75	0	1.74192	Tor1aip1	TOIP1_MOUSE	Torsin-1A-interacting protein 1 (Lamina-associated polypeptide 1B) (LAP1B)	1.74192	0.269648	1.10553	Q921T2
Q5SUC9	Combo-Control	0.268445	0.166925	1.60818	29	0.11863	0.261398	NA	0.15	0	0.925805	Sco1	SCO1_MOUSE	Protein SCO1 homolog, mitochondrial	0.925805	0.268445	0.582697	Q5SUC9
Q8K4Q0	Combo-Control	0.266399	0.189404	1.40652	26	0.171411	0.335256	NA	0.425	0	0.765961	Rptor Raptor	RPTOR_MOUSE	Regulatory-associated protein of mTOR (Raptor) (p150 target of rapamycin (TOR)-scaffold protein)	0.765961	0.266399	0.474624	Q8K4Q0
Q9R112	Combo-Control	0.265343	0.124888	2.12464	36	0.0405517	0.131225	NA	0.586364	0	1.39199	Sqor Sqrdl	SQOR_MOUSE	Sulfide:quinone oxidoreductase, mitochondrial (SQOR) (EC 1.8.5.-) (Sulfide quinone oxidoreductase)	1.39199	0.265343	0.881983	Q9R112
Q9JHH6	Combo-Control	0.265101	0.171367	1.54698	36	0.130615	0.278963	NA	0.175	0	0.884006	Cpb2 Tafi	CBPB2_MOUSE	Carboxypeptidase B2 (EC 3.4.17.20) (Carboxypeptidase R) (CPR) (Carboxypeptidase U) (CPU) (Thrombin-activable fibrinolysis inhibitor) (TAFI)	0.884006	0.265101	0.554454	Q9JHH6
Q08879	Combo-Control	0.265094	0.12487	2.12295	36	0.0407022	0.131439	NA	0.208333	0	1.39038	Fbln1	FBLN1_MOUSE	Fibulin-1 (FIBL-1) (Basement-membrane protein 90) (BM-90)	1.39038	0.265094	0.881275	Q08879
Q9DBP5	Combo-Control	0.26504	0.0786879	3.36825	36	0.00181372	0.0192077	NA	0.8	0	2.74143	Cmpk1 Cmk Cmpk Uck Umk Umpk	KCY_MOUSE	UMP-CMP kinase (EC 2.7.4.14) (Deoxycytidylate kinase) (CK) (dCMP kinase) (Nucleoside-diphosphate kinase) (EC 2.7.4.6) (Uridine monophosphate/cytidine monophosphate kinase) (UMP/CMP kinase) (UMP/CMPK)	2.74143	0.26504	1.71652	Q9DBP5
Q9ESP1	Combo-Control	0.264841	0.0951764	2.78264	36	0.00853245	0.0487472	NA	0.406667	0	2.06893	Sdf2l1	SDF2L_MOUSE	Stromal cell-derived factor 2-like protein 1 (SDF2-like protein 1)	2.06893	0.264841	1.31205	Q9ESP1
Q8CG72	Combo-Control	0.264742	0.128544	2.05954	36	0.0467304	0.143801	NA	0	0	1.3304	Adprhl2 Arh3	ARHL2_MOUSE	ADP-ribose glycohydrolase ARH3 (ADP-ribosylhydrolase 3) (O-acetyl-ADP-ribose deacetylase ARH3) (EC 3.5.1.-) (Poly(ADP-ribose) glycohydrolase ARH3) (EC 3.2.1.143) ([Protein ADP-ribosylarginine] hydrolase-like protein 2) ([Protein ADP-ribosylserine] hydrolase) (EC 3.2.2.-)	1.3304	0.264742	0.842238	Q8CG72
P97450	Combo-Control	0.264001	0.137792	1.91594	36	0.0633403	0.173678	NA	0.565217	0	1.19832	Atp5pf Atp5j	ATP5J_MOUSE	ATP synthase-coupling factor 6, mitochondrial (ATPase subunit F6) (ATP synthase peripheral stalk subunit F6)	1.19832	0.264001	0.760256	P97450
P28033	Combo-Control	0.263859	0.105977	2.48978	36	0.0175373	0.0769162	NA	0.429167	0	1.75604	Cebpb	CEBPB_MOUSE	CCAAT/enhancer-binding protein beta (C/EBP beta) (AGP/EBP) (Interleukin-6-dependent-binding protein) (IL-6DBP) (Liver-enriched transcriptional activator) (LAP)	1.75604	0.263859	1.11398	P28033
Q9D1I2	Combo-Control	0.263424			0			NA	0.9	0		Card19	CAR19_MOUSE	Caspase recruitment domain-containing protein 19 (Bcl10-interacting CARD protein) (BinCARD)		0.263424	NA	Q9D1I2
Q8BH43	Combo-Control	0.263401	0.0982655	2.68051	36	0.0110193	0.0576456	NA	0.568421	0	1.95785	Wasf2 Wave2	WASF2_MOUSE	Wiskott-Aldrich syndrome protein family member 2 (WASP family protein member 2) (Protein WAVE-2)	1.95785	0.263401	1.23923	Q8BH43
P70271	Combo-Control	0.263223	0.342295	0.768995	19	0.45135	0.625523	NA	0.5	0	0.345486	Pdlim4 Ril	PDLI4_MOUSE	PDZ and LIM domain protein 4 (LIM protein RIL) (Reversion-induced LIM protein)	0.345486	0.263223	0.203757	P70271
Q9EQ06	Combo-Control	0.263122	0.137732	1.91039	36	0.064074	0.174963	NA	0.70303	0	1.19332	Hsd17b11 Dhrs8 Pan1b	DHB11_MOUSE	Estradiol 17-beta-dehydrogenase 11 (EC 1.1.1.62) (17-beta-hydroxysteroid dehydrogenase 11) (17-beta-HSD 11) (17bHSD11) (17betaHSD11) (17-beta-hydroxysteroid dehydrogenase XI) (17-beta-HSD XI) (17betaHSDXI) (Dehydrogenase/reductase SDR family member 8)	1.19332	0.263122	0.757054	Q9EQ06
P09925	Combo-Control	0.262741	0.160827	1.63369	24	0.115375	0.258475	NA	0.3	0	0.937887	Surf1 Surf-1	SURF1_MOUSE	Surfeit locus protein 1	0.937887	0.262741	0.587581	P09925
O70566	Combo-Control	0.26265	0.0855749	3.06924	36	0.00406479	0.0312346	NA	0.194444	0	2.39096	Diaph2 Diap2	DIAP2_MOUSE	Protein diaphanous homolog 2 (Diaphanous-related formin-2) (DRF2) (mDia3)	2.39096	0.26265	1.50536	O70566
Q8CG16	Combo-Control	0.262206	0.10643	2.46365	36	0.0186645	0.0802389	NA	0.63	0	1.72898	C1ra C1r	C1RA_MOUSE	Complement C1r-A subcomponent (EC 3.4.21.41) (Complement component 1 subcomponent r-A) [Cleaved into: Complement C1r-A subcomponent heavy chain; Complement C1r-A subcomponent light chain]	1.72898	0.262206	1.09562	Q8CG16
Q9DC37	Combo-Control	0.26217	0.129047	2.03159	36	0.0496267	0.148606	NA	0	0	1.30428	Mfsd1	MFSD1_MOUSE	Major facilitator superfamily domain-containing protein 1	1.30428	0.26217	0.827963	Q9DC37
Q9CRY7	Combo-Control	0.261366	0.275622	0.948277	17	0.356275	0.536024	NA	0.4	0	0.448215	Gdpd1 Gde4	GDPD1_MOUSE	Lysophospholipase D GDPD1 (EC 3.1.4.39) (Glycerophosphodiester phosphodiesterase 4) (Glycerophosphodiester phosphodiesterase domain-containing protein 1)	0.448215	0.261366	0.270816	Q9CRY7
Q8K3C3	Combo-Control	0.260269	0.104966	2.47955	36	0.0179712	0.0780433	NA	0	0	1.74542	Lzic	LZIC_MOUSE	Protein LZIC (Leucine zipper and CTNNBIP1 domain-containing protein) (Leucine zipper and ICAT homologous domain-containing protein)	1.74542	0.260269	1.10766	Q8K3C3
P55065	Combo-Control	0.259472	0.0986649	2.62983	36	0.0124883	0.0623985	NA	0.552778	0	1.9035	Pltp	PLTP_MOUSE	Phospholipid transfer protein (Lipid transfer protein II)	1.9035	0.259472	1.20483	P55065
O88413	Combo-Control	0.258652	0.202861	1.27502	36	0.210469	0.380457	NA	0	0	0.676811	Tulp3	TULP3_MOUSE	Tubby-related protein 3 (Tubby-like protein 3)	0.676811	0.258652	0.419695	O88413
Q9D125	Combo-Control	0.258146	0.150007	1.72089	36	0.0938554	0.224158	NA	0.0166667	0	1.02754	Mrps25 Rpms25	RT25_MOUSE	28S ribosomal protein S25, mitochondrial (MRP-S25) (S25mt)	1.02754	0.258146	0.649445	Q9D125
Q9D7X3	Combo-Control	0.257766	0.120603	2.13731	36	0.0394368	0.129208	NA	0.426667	0	1.4041	Dusp3	DUS3_MOUSE	Dual specificity protein phosphatase 3 (EC 3.1.3.16) (EC 3.1.3.48) (T-DSP11) (Vaccinia H1-related phosphatase) (VHR)	1.4041	0.257766	0.888712	Q9D7X3
Q8BLF1	Combo-Control	0.257647	0.106636	2.41613	36	0.0208848	0.0865616	NA	0.52381	0	1.68017	Nceh1 Aadacl1 Kiaa1363	NCEH1_MOUSE	Neutral cholesterol ester hydrolase 1 (NCEH) (EC 3.1.1.-) (Arylacetamide deacetylase-like 1) (Chlorpyrifos oxon-binding protein) (CPO-BP)	1.68017	0.257647	1.06267	Q8BLF1
O35551	Combo-Control	0.257381	0.136606	1.88411	36	0.0676452	0.181246	NA	0.175	0	1.16976	Rabep1 Rab5ep Rabpt5 Rabpt5a	RABE1_MOUSE	Rab GTPase-binding effector protein 1 (Rabaptin-5) (Rabaptin-5alpha)	1.16976	0.257381	0.741731	O35551
P70268	Combo-Control	0.257172	0.0661873	3.88551	36	0.000420501	0.00762074	NA	0.5725	0	3.37623	Pkn1 Pkn Prk1 Prkcl1	PKN1_MOUSE	Serine/threonine-protein kinase N1 (EC 2.7.11.13) (Protein kinase C-like 1) (Protein kinase C-like PKN) (Protein-kinase C-related kinase 1) (Serine-threonine protein kinase N)	3.37623	0.257172	2.118	P70268
P00493	Combo-Control	0.257124	0.120875	2.12719	36	0.0403252	0.131008	NA	0.846923	0	1.39442	Hprt1 Hprt	HPRT_MOUSE	Hypoxanthine-guanine phosphoribosyltransferase (HGPRT) (HGPRTase) (EC 2.4.2.8) (HPRT B)	1.39442	0.257124	0.882703	P00493
O70423	Combo-Control	0.256346	0.283164	0.905289	36	0.371331	0.551409	NA	0.815217	0	0.430238	Aoc3 Vap1	AOC3_MOUSE	Membrane primary amine oxidase (EC 1.4.3.21) (Copper amine oxidase) (Semicarbazide-sensitive amine oxidase) (SSAO) (Vascular adhesion protein 1) (VAP-1)	0.430238	0.256346	0.258526	O70423
Q07456	Combo-Control	0.255694	0.225091	1.13596	36	0.263479	0.44018	NA	0.05	0	0.579254	Ambp Itil	AMBP_MOUSE	Protein AMBP [Cleaved into: Alpha-1-microglobulin; Inter-alpha-trypsin inhibitor light chain (ITI-LC) (Bikunin) (HI-30); Trypstatin]	0.579254	0.255694	0.35637	Q07456
O35309	Combo-Control	0.255316	0.101879	2.50607	36	0.0168666	0.0748821	NA	0.803	0	1.77297	Nmi	NMI_MOUSE	N-myc-interactor (Nmi) (N-myc and STAT interactor)	1.77297	0.255316	1.12562	O35309
Q3TFQ1	Combo-Control	0.254279	0.129313	1.96638	29	0.0588916	0.16618	NA	0.2	0	1.22995	Spryd7 Clld6	SPRY7_MOUSE	SPRY domain-containing protein 7 (Chronic lymphocytic leukemia deletion region gene 6 protein homolog) (CLL deletion region gene 6 protein homolog)	1.22995	0.254279	0.77942	Q3TFQ1
P29416	Combo-Control	0.253716	0.147972	1.71463	36	0.095012	0.22625	NA	0.447059	0	1.02222	Hexa	HEXA_MOUSE	Beta-hexosaminidase subunit alpha (EC 3.2.1.52) (Beta-N-acetylhexosaminidase subunit alpha) (Hexosaminidase subunit A) (N-acetyl-beta-glucosaminidase subunit alpha)	1.02222	0.253716	0.64541	P29416
Q64112	Combo-Control	0.25361	0.149944	1.69137	36	0.0994068	0.23407	NA	0.394444	0	1.00258	Ifit2 Garg39 Ifi54 Isg54	IFIT2_MOUSE	Interferon-induced protein with tetratricopeptide repeats 2 (IFIT-2) (Glucocorticoid-attenuated response gene 39 protein) (GARG-39) (Interferon-induced 54 kDa protein) (IFI-54K) (P54)	1.00258	0.25361	0.630655	Q64112
Q9D8Y7	Combo-Control	0.253282	0.134548	1.88248	36	0.0678735	0.181246	NA	0.513158	0	1.1683	Tnfaip8l2	TP8L2_MOUSE	Tumor necrosis factor alpha-induced protein 8-like protein 2 (TIPE2) (TNF alpha-induced protein 8-like protein 2) (TNFAIP8-like protein 2)	1.1683	0.253282	0.741731	Q9D8Y7
Q7TSQ8	Combo-Control	0.252169	0.102064	2.4707	33	0.018822	0.0807561	NA	0.475	0	1.72533	Pdpr Kiaa1990	PDPR_MOUSE	Pyruvate dehydrogenase phosphatase regulatory subunit, mitochondrial (PDPr)	1.72533	0.252169	1.09282	Q7TSQ8
Q8VCT4	Combo-Control	0.251622	0.239137	1.05221	36	0.299715	0.479128	NA	0.292857	0	0.523292	Ces1d Ces1 Ces3	CES1D_MOUSE	Carboxylesterase 1D (Carboxylesterase 3) (EC 3.1.1.1) (EC 3.1.1.67) (Fatty acid ethyl ester synthase) (FAEE synthase) (Triacylglycerol hydrolase) (TGH)	0.523292	0.251622	0.319548	Q8VCT4
P24638	Combo-Control	0.251494	0.0786062	3.19941	36	0.00287181	0.025552	NA	0.435294	0	2.54184	Acp2	PPAL_MOUSE	Lysosomal acid phosphatase (LAP) (EC 3.1.3.2)	2.54184	0.251494	1.59257	P24638
Q02819	Combo-Control	0.251035	0.077545	3.23728	36	0.00259272	0.0237669	NA	0.9125	0	2.58624	Nucb1 Nuc Nucb	NUCB1_MOUSE	Nucleobindin-1 (CALNUC)	2.58624	0.251035	1.62403	Q02819
Q64282	Combo-Control	0.249807	0.142079	1.75823	36	0.0872086	0.213477	NA	0.751282	0	1.05944	Ifit1 Garg16 Ifi56 Isg56	IFIT1_MOUSE	Interferon-induced protein with tetratricopeptide repeats 1 (IFIT-1) (Glucocorticoid-attenuated response gene 16 protein) (GARG-16) (Interferon-induced 56 kDa protein) (IFI-56K) (P56)	1.05944	0.249807	0.670649	Q64282
Q9EPL9	Combo-Control	0.248931	0.095327	2.61134	36	0.0130681	0.0639137	NA	0.754839	0	1.88379	Acox3	ACOX3_MOUSE	Peroxisomal acyl-coenzyme A oxidase 3 (EC 1.3.3.6) (Branched-chain acyl-CoA oxidase) (BRCACox) (Pristanoyl-CoA oxidase)	1.88379	0.248931	1.19441	Q9EPL9
P50171	Combo-Control	0.247822	0.0664818	3.72766	36	0.000661938	0.00970992	NA	0.619048	0	3.17918	Hsd17b8 H2-Ke6 Hke6	DHB8_MOUSE	Estradiol 17-beta-dehydrogenase 8 (EC 1.1.1.62) (17-beta-hydroxysteroid dehydrogenase 8) (17-beta-HSD 8) (3-ketoacyl-[acyl-carrier-protein] reductase alpha subunit) (KAR alpha subunit) (3-oxoacyl-[acyl-carrier-protein] reductase) (EC 1.1.1.-) (Protein Ke6) (Ke-6) (Testosterone 17-beta-dehydrogenase 8) (EC 1.1.1.239)	3.17918	0.247822	2.01278	P50171
O08739	Combo-Control	0.246884	0.0757232	3.26034	36	0.00243565	0.022676	NA	0.470833	0	2.61338	Ampd3	AMPD3_MOUSE	AMP deaminase 3 (EC 3.5.4.6) (AMP deaminase H-type) (AMP deaminase isoform E) (Heart-type AMPD)	2.61338	0.246884	1.64443	O08739
O08585	Combo-Control	0.245907	0.0904257	2.71943	36	0.0100012	0.0540984	NA	0.617308	0	1.99995	Clta	CLCA_MOUSE	Clathrin light chain A (Lca)	1.99995	0.245907	1.26682	O08585
Q921Z5	Combo-Control	0.245175	0.148894	1.64664	34	0.108845	0.248138	NA	0.21	0	0.963192	Tnfaip8	TFIP8_MOUSE	Tumor necrosis factor alpha-induced protein 8 (TNF alpha-induced protein 8)	0.963192	0.245175	0.605306	Q921Z5
Q3UIR3	Combo-Control	0.244229	0.111191	2.19647	36	0.034582	0.119455	NA	0.868033	0	1.46115	Dtx3l Bbap	DTX3L_MOUSE	E3 ubiquitin-protein ligase DTX3L (EC 2.3.2.27) (Protein deltex-3-like) (RING-type E3 ubiquitin transferase DTX3L)	1.46115	0.244229	0.922796	Q3UIR3
P01900	Combo-Control	0.243966	0.10475	2.32903	36	0.0255861	0.0979673	NA	0.90991	0	1.592	H2-D1	HA12_MOUSE	H-2 class I histocompatibility antigen, D-D alpha chain (H-2D(D))	1.592	0.243966	1.00892	P01900
Q8R3U1	Combo-Control	0.243837	0.144363	1.68905	36	0.0998539	0.234613	NA	0.433333	0	1.00064	Plaat3 H-rev107 Hrasls3 Hrev107 Pla2g16	PLAT3_MOUSE	Phospholipase A and acyltransferase 3 (EC 2.3.1.-) (EC 3.1.1.32) (EC 3.1.1.4) (Adipose-specific phospholipase A2) (AdPLA) (Group XVI phospholipase A2) (H-rev 107 protein homolog) (HRAS-like suppressor 3) (HRSL3)	1.00064	0.243837	0.629647	Q8R3U1
P56394	Combo-Control	0.243769	0.118907	2.05008	36	0.047694	0.1452	NA	0.381818	0	1.32154	Cox17 Cox17a	COX17_MOUSE	Cytochrome c oxidase copper chaperone	1.32154	0.243769	0.838033	P56394
P04186	Combo-Control	0.243292	0.165214	1.47259	36	0.149553	0.306445	NA	0.879268	0	0.825206	Cfb Bf H2-Bf	CFAB_MOUSE	Complement factor B (EC 3.4.21.47) (C3/C5 convertase) [Cleaved into: Complement factor B Ba fragment; Complement factor B Bb fragment]	0.825206	0.243292	0.513647	P04186
E9Q7D5	Combo-Control	0.243139	1.08109	0.224903	1	0.859166	0.919068	NA	0.85	0	0.0659231	Arhgef5	ARHG5_MOUSE	Rho guanine nucleotide exchange factor 5	0.0659231	0.243139	0.0366523	E9Q7D5
Q8VDQ1	Combo-Control	0.242994	0.0935442	2.59764	36	0.0135133	0.0654121	NA	0	0	1.86924	Ptgr2 Zadh1	PTGR2_MOUSE	Prostaglandin reductase 2 (PRG-2) (EC 1.3.1.48) (15-oxoprostaglandin 13-reductase) (Zinc-binding alcohol dehydrogenase domain-containing protein 1)	1.86924	0.242994	1.18434	Q8VDQ1
Q8K426	Combo-Control	0.242423	0.162713	1.48988	36	0.144965	0.300591	NA	0	0	0.838737	Retnlg Xcp1	RETNG_MOUSE	Resistin-like gamma (Resistin-like molecule gamma) (RELMgamma) (Ten-cysteine protein 1) (XCP1)	0.838737	0.242423	0.522024	Q8K426
Q5XKE0	Combo-Control	0.242366	0.841695	0.28795	29	0.775433	0.872713	NA	0.945886	0	0.110456	Mybpc2	MYPC2_MOUSE	Myosin-binding protein C, fast-type (Fast MyBP-C) (C-protein, skeletal muscle fast isoform)	0.110456	0.242366	0.0591284	Q5XKE0
Q80Y55	Combo-Control	0.24218	0.169271	1.43072	35	0.161378	0.321561	NA	0	0	0.792156	Bsdc1	BSDC1_MOUSE	BSD domain-containing protein 1	0.792156	0.24218	0.492737	Q80Y55
Q91X96	Combo-Control	0.241732	0.0784849	3.07997	36	0.00395093	0.0309098	NA	0	0	2.4033	Rabif	MSS4_MOUSE	Guanine nucleotide exchange factor MSS4 (Rab-interacting factor)	2.4033	0.241732	1.5099	Q91X96
Q9DCV4	Combo-Control	0.239813	0.160569	1.49351	29	0.146104	0.302087	NA	0.3	0	0.835338	Rmdn1 Fam82b	RMD1_MOUSE	Regulator of microtubule dynamics protein 1 (RMD-1) (mRMD-1) (Microtubule-associated protein) (Protein FAM82B)	0.835338	0.239813	0.519867	Q9DCV4
P03958	Combo-Control	0.239306	0.100703	2.37635	36	0.0229255	0.0919137	NA	0.766667	0	1.63968	Ada	ADA_MOUSE	Adenosine deaminase (EC 3.5.4.4) (Adenosine aminohydrolase)	1.63968	0.239306	1.03662	P03958
P84096	Combo-Control	0.237178	0.107325	2.20991	36	0.0335564	0.117124	NA	0.74359	0	1.47422	Rhog Arhg Sid10750	RHOG_MOUSE	Rho-related GTP-binding protein RhoG (Sid 10750)	1.47422	0.237178	0.931355	P84096
Q9D1Q6	Combo-Control	0.237127	0.0875348	2.70895	36	0.0102665	0.0549515	NA	0.827586	0	1.98858	Erp44 Kiaa0573 Txndc4	ERP44_MOUSE	Endoplasmic reticulum resident protein 44 (ER protein 44) (ERp44) (Thioredoxin domain-containing protein 4)	1.98858	0.237127	1.26002	Q9D1Q6
P49442	Combo-Control	0.236808	0.117344	2.01806	35	0.0513011	0.152151	NA	0.545833	0	1.28987	Inpp1	INPP_MOUSE	Inositol polyphosphate 1-phosphatase (IPP) (IPPase) (EC 3.1.3.57)	1.28987	0.236808	0.817724	P49442
Q8VD04	Combo-Control	0.23651	0.15978	1.48022	36	0.147514	0.304278	NA	0.694118	0	0.831167	Gripap1 DXImx47e Kiaa1167	GRAP1_MOUSE	GRIP1-associated protein 1 (GRASP-1) (HCMV-interacting protein) [Cleaved into: GRASP-1 C-terminal chain (30kDa C-terminus form)]	0.831167	0.23651	0.516729	Q8VD04
C0HKD8	Combo-Control	0.235937	0.202407	1.16566	28	0.253587	0.429604	NA	0.4	0	0.595873	NA	NA	NA	0.595873	0.235937	0.366932	C0HKD8;C0HKD9
Q9JJN5	Combo-Control	0.23564	0.249907	0.942908	36	0.352013	0.532279	NA	0.45	0	0.453441	Cpn1	CBPN_MOUSE	Carboxypeptidase N catalytic chain (CPN) (EC 3.4.17.3) (Carboxypeptidase N polypeptide 1) (Carboxypeptidase N small subunit)	0.453441	0.23564	0.273861	Q9JJN5
Q6IRU5	Combo-Control	0.234987	0.0979184	2.39983	36	0.0217005	0.0886391	NA	0.484211	0	1.66353	Cltb	CLCB_MOUSE	Clathrin light chain B (Lcb)	1.66353	0.234987	1.05237	Q6IRU5
P06684	Combo-Control	0.234833	0.195786	1.19944	36	0.238193	0.414856	NA	0.466667	0	0.62307	C5 Hc	CO5_MOUSE	Complement C5 (Hemolytic complement) [Cleaved into: Complement C5 beta chain; Complement C5 alpha chain; C5a anaphylatoxin; Complement C5 alpha' chain]	0.62307	0.234833	0.382103	P06684
Q9D6Y7	Combo-Control	0.234748	0.112352	2.08939	36	0.0438013	0.137815	NA	0.0666667	0	1.35851	Msra	MSRA_MOUSE	Mitochondrial peptide methionine sulfoxide reductase (EC 1.8.4.11) (Peptide-methionine (S)-S-oxide reductase) (Peptide Met(O) reductase) (Protein-methionine-S-oxide reductase) (PMSR)	1.35851	0.234748	0.860702	Q9D6Y7
Q9EP89	Combo-Control	0.234726	0.102245	2.29573	36	0.0276224	0.102422	NA	0.552632	0	1.55874	Lactb Lact1	LACTB_MOUSE	Serine beta-lactamase-like protein LACTB, mitochondrial (EC 3.4.-.-)	1.55874	0.234726	0.989606	Q9EP89
Q60780	Combo-Control	0.233582	0.120478	1.93879	34	0.0608632	0.170057	NA	0.25	0	1.21564	Gas7	GAS7_MOUSE	Growth arrest-specific protein 7 (GAS-7)	1.21564	0.233582	0.769406	Q60780
O88958	Combo-Control	0.233025	0.161388	1.44388	36	0.157418	0.316587	NA	0.610417	0	0.802944	Gnpda1 Gnpi	GNPI1_MOUSE	Glucosamine-6-phosphate isomerase 1 (EC 3.5.99.6) (Glucosamine-6-phosphate deaminase 1) (GNPDA 1) (GlcN6P deaminase 1) (Oscillin)	0.802944	0.233025	0.499507	O88958
Q61879	Combo-Control	0.233007	0.192314	1.2116	34	0.23402	0.41022	NA	0.05	0	0.630747	Myh10	MYH10_MOUSE	Myosin-10 (Cellular myosin heavy chain, type B) (Myosin heavy chain 10) (Myosin heavy chain, non-muscle IIb) (Non-muscle myosin heavy chain B) (NMMHC-B) (Non-muscle myosin heavy chain IIb) (NMMHC II-b) (NMMHC-IIB)	0.630747	0.233007	0.386983	Q61879
P23780	Combo-Control	0.232875	0.163789	1.42179	36	0.163692	0.3241	NA	0.511765	0	0.785972	Glb1 Bgl Glb-1	BGAL_MOUSE	Beta-galactosidase (EC 3.2.1.23) (Acid beta-galactosidase) (Lactase)	0.785972	0.232875	0.489321	P23780
Q91ZJ5	Combo-Control	0.232065	0.113135	2.05123	36	0.0475758	0.1452	NA	0.827778	0	1.32261	Ugp2	UGPA_MOUSE	UTP--glucose-1-phosphate uridylyltransferase (EC 2.7.7.9) (UDP-glucose pyrophosphorylase) (UDPGP) (UGPase)	1.32261	0.232065	0.838033	Q91ZJ5
Q9D8T2	Combo-Control	0.231617	0.121558	1.9054	36	0.0647387	0.175927	NA	0.802174	0	1.18884	Gsdmdc1 Gsdmd	GSDMD_MOUSE	Gasdermin-D (Gasdermin domain-containing protein 1) [Cleaved into: Gasdermin-D, N-terminal (GSDMD-NT); Gasdermin-D, C-terminal (GSDMD-CT)]	1.18884	0.231617	0.754668	Q9D8T2
Q9D1K2	Combo-Control	0.231509	0.0996463	2.32331	36	0.0259262	0.0986258	NA	0.118182	0	1.58626	Atp6v1f Atp6s14 Vatf	VATF_MOUSE	V-type proton ATPase subunit F (V-ATPase subunit F) (V-ATPase 14 kDa subunit) (Vacuolar proton pump subunit F)	1.58626	0.231509	1.00601	Q9D1K2
Q60855	Combo-Control	0.230526	0.0660095	3.49232	36	0.00128625	0.014814	NA	0.732258	0	2.89068	Ripk1 Rinp Rip	RIPK1_MOUSE	Receptor-interacting serine/threonine-protein kinase 1 (EC 2.7.11.1) (Cell death protein RIP) (Receptor-interacting protein 1) (RIP-1)	2.89068	0.230526	1.82933	Q60855
Q8K482	Combo-Control	0.230113	0.0802622	2.86701	36	0.00688336	0.0426965	NA	0.633333	0	2.1622	Emilin2	EMIL2_MOUSE	EMILIN-2 (Basilin) (Elastin microfibril interface-located protein 2) (Elastin microfibril interfacer 2)	2.1622	0.230113	1.36961	Q8K482
Q9D1C3	Combo-Control	0.230075	0.129212	1.78061	35	0.0836591	0.207808	NA	0	0	1.07749	Pyurf Pigy Prey	PREY_MOUSE	Protein preY, mitochondrial	1.07749	0.230075	0.682338	Q9D1C3
Q62188	Combo-Control	0.2299	0.160436	1.43297	36	0.160495	0.320253	NA	0.421429	0	0.794538	Dpysl3 Drp3 Ulip	DPYL3_MOUSE	Dihydropyrimidinase-related protein 3 (DRP-3) (Unc-33-like phosphoprotein 1) (ULIP-1)	0.794538	0.2299	0.494507	Q62188
Q6P3A8	Combo-Control	0.229558	0.0934612	2.45619	36	0.0189984	0.0813523	NA	0.576667	0	1.72128	Bckdhb	ODBB_MOUSE	2-oxoisovalerate dehydrogenase subunit beta, mitochondrial (EC 1.2.4.4) (Branched-chain alpha-keto acid dehydrogenase E1 component beta chain) (BCKDE1B) (BCKDH E1-beta)	1.72128	0.229558	1.08963	Q6P3A8
Q8CIM3	Combo-Control	0.229492	0.114293	2.00792	34	0.0526504	0.154779	NA	0.05	0	1.2786	D2hgdh	D2HDH_MOUSE	D-2-hydroxyglutarate dehydrogenase, mitochondrial (EC 1.1.99.-)	1.2786	0.229492	0.810289	Q8CIM3
P35278	Combo-Control	0.228765	0.076587	2.98699	36	0.00504584	0.0356142	NA	0.6	0	2.29707	Rab5c	RAB5C_MOUSE	Ras-related protein Rab-5C	2.29707	0.228765	1.44838	P35278
P70302	Combo-Control	0.228327	0.169615	1.34615	34	0.187163	0.352411	NA	0.516667	0	0.727781	Stim1 Sim	STIM1_MOUSE	Stromal interaction molecule 1	0.727781	0.228327	0.45295	P70302
A2ABU4	Combo-Control	0.227068	0.41181	0.55139	11	0.59239	0.742754	NA	0.575	0	0.227392	Myom3	MYOM3_MOUSE	Myomesin-3 (Myomesin family member 3)	0.227392	0.227068	0.129155	A2ABU4
Q8R001	Combo-Control	0.22579	0.110176	2.04936	36	0.0477676	0.1452	NA	0.483333	0	1.32087	Mapre2	MARE2_MOUSE	Microtubule-associated protein RP/EB family member 2 (APC-binding protein EB2) (End-binding protein 2) (EB2)	1.32087	0.22579	0.838033	Q8R001
P48999	Combo-Control	0.225463	0.102486	2.19994	36	0.0343148	0.118721	NA	0.266667	0	1.46452	Alox5	LOX5_MOUSE	Arachidonate 5-lipoxygenase (5-LO) (5-lipoxygenase) (EC 1.13.11.34)	1.46452	0.225463	0.925472	P48999
Q91V76	Combo-Control	0.223834	0.133464	1.67711	36	0.102185	0.238285	NA	0.564286	0	0.990613	NA	CK054_MOUSE	Ester hydrolase C11orf54 homolog (EC 3.1.-.-)	0.990613	0.223834	0.622903	Q91V76
P0DJF2	Combo-Control	0.223116	0.289907	0.769613	26	0.448466	0.623014	NA	0.383333	0	0.348271	Pet117 Gm20571	PT117_MOUSE	Protein PET117 homolog, mitochondrial	0.348271	0.223116	0.205502	P0DJF2
A2ADY9	Combo-Control	0.22239	0.0788368	2.8209	36	0.00774362	0.0457453	NA	0.647917	0	2.11106	Ddi2	DDI2_MOUSE	Protein DDI1 homolog 2 (EC 3.4.23.-)	2.11106	0.22239	1.33965	A2ADY9
Q8VE11	Combo-Control	0.22092	0.124386	1.77608	35	0.0844148	0.209206	NA	0.444444	0	1.07358	Mtmr6	MTMR6_MOUSE	Myotubularin-related protein 6 (Phosphatidylinositol-3,5-bisphosphate 3-phosphatase) (EC 3.1.3.95) (Phosphatidylinositol-3-phosphate phosphatase) (EC 3.1.3.64)	1.07358	0.22092	0.679426	Q8VE11
Q9Z0P5	Combo-Control	0.220505	0.0938743	2.34894	36	0.0244343	0.0954275	NA	0.816667	0	1.612	Twf2 Ptk9l	TWF2_MOUSE	Twinfilin-2 (A6-related protein) (mA6RP) (Twinfilin-1-like protein)	1.612	0.220505	1.02033	Q9Z0P5
P47754	Combo-Control	0.2204	0.052952	4.16225	36	0.000187255	0.00459356	NA	0.782609	0	3.72757	Capza2 Cappa2	CAZA2_MOUSE	F-actin-capping protein subunit alpha-2 (CapZ alpha-2)	3.72757	0.2204	2.33785	P47754
Q9DAU1	Combo-Control	0.220111	0.0791505	2.78091	36	0.00856966	0.0488313	NA	0.714063	0	2.06704	Cnpy3 Prat4a Tnrc5	CNPY3_MOUSE	Protein canopy homolog 3 (Protein associated with Tlr4) (Trinucleotide repeat-containing gene 5 protein)	2.06704	0.220111	1.3113	Q9DAU1
P01796	Combo-Control	0.219894	0.420254	0.523241	36	0.604013	0.751684	NA	0	0	0.218954	NA	NA	NA	0.218954	0.219894	0.123965	P01796;P01797;P01799;P01800;P01801;P01802;P01803;P01804
P40237	Combo-Control	0.219598	0.207714	1.05721	35	0.297657	0.477262	NA	0	0	0.526285	Cd82 Kai1	CD82_MOUSE	CD82 antigen (C33 antigen) (IA4) (Inducible membrane protein R2) (Metastasis suppressor Kangai-1 homolog) (CD antigen CD82)	0.526285	0.219598	0.321243	P40237
Q8CIV8	Combo-Control	0.219089	0.271234	0.807746	13	0.433769	0.609917	NA	0.6	0	0.362742	Tbce	TBCE_MOUSE	Tubulin-specific chaperone E (Tubulin-folding cofactor E)	0.362742	0.219089	0.214729	Q8CIV8
P14824	Combo-Control	0.218826	0.0747095	2.92903	36	0.00586695	0.0385448	NA	0.960938	0	2.23159	Anxa6 Anx6	ANXA6_MOUSE	Annexin A6 (67 kDa calelectrin) (Annexin VI) (Annexin-6) (Calphobindin-II) (CPB-II) (Chromobindin-20) (Lipocortin VI) (Protein III) (p68) (p70)	2.23159	0.218826	1.41403	P14824
Q62000	Combo-Control	0.218744	0.102747	2.12896	36	0.0401681	0.130905	NA	0.843651	0	1.39612	Ogn Og	MIME_MOUSE	Mimecan (Osteoglycin)	1.39612	0.218744	0.883043	Q62000
P50518	Combo-Control	0.217658	0.0793119	2.74433	36	0.00939666	0.0518428	NA	0.65	0	2.02703	Atp6v1e1 Atp6e Atp6e2	VATE1_MOUSE	V-type proton ATPase subunit E 1 (V-ATPase subunit E 1) (V-ATPase 31 kDa subunit) (p31) (Vacuolar proton pump subunit E 1)	2.02703	0.217658	1.28531	P50518
O35381	Combo-Control	0.217656	0.0753791	2.88748	36	0.00653091	0.0412168	NA	0.84375	0	2.18503	Anp32a Anp32 Lanp	AN32A_MOUSE	Acidic leucine-rich nuclear phosphoprotein 32 family member A (Acidic nuclear phosphoprotein pp32) (Leucine-rich acidic nuclear protein) (LANP) (Potent heat-stable protein phosphatase 2A inhibitor I1PP2A)	2.18503	0.217656	1.38493	O35381
Q8BXL7	Combo-Control	0.217043	0.332126	0.653495	18	0.521699	0.685183	NA	0.616667	0	0.28258	Arfrp1	ARFRP_MOUSE	ADP-ribosylation factor-related protein 1 (ARF-related protein 1)	0.28258	0.217043	0.164193	Q8BXL7
Q91YI4	Combo-Control	0.21624	0.0659411	3.27929	36	0.00231343	0.0219801	NA	0.561905	0	2.63574	Arrb2	ARRB2_MOUSE	Beta-arrestin-2 (Arrestin beta-2)	2.63574	0.21624	1.65797	Q91YI4
Q8VEA4	Combo-Control	0.215966	0.12945	1.66833	36	0.103926	0.240633	NA	0.4	0	0.983274	Chchd4 Mia40	MIA40_MOUSE	Mitochondrial intermembrane space import and assembly protein 40 (Coiled-coil-helix-coiled-coil-helix domain-containing protein 4)	0.983274	0.215966	0.618644	Q8VEA4
Q9CQN6	Combo-Control	0.215123	0.303629	0.708504	34	0.483462	0.653826	NA	0.05	0	0.315638	Tmem14c	TM14C_MOUSE	Transmembrane protein 14C	0.315638	0.215123	0.184538	Q9CQN6
P58771	Combo-Control	0.214942	0.301672	0.712504	36	0.480745	0.651904	NA	0.937888	0	0.318085	Tpm1 Tpm-1 Tpma	TPM1_MOUSE	Tropomyosin alpha-1 chain (Alpha-tropomyosin) (Tropomyosin-1)	0.318085	0.214942	0.185816	P58771
P21107	Combo-Control	0.214592	0.0803108	2.67202	36	0.0112535	0.0585182	NA	0.917355	0	1.94871	Tpm3 Tpm-5 Tpm5	TPM3_MOUSE	Tropomyosin alpha-3 chain (Gamma-tropomyosin) (Tropomyosin-3)	1.94871	0.214592	1.23271	P21107
Q61247	Combo-Control	0.214503	0.244035	0.878986	36	0.385239	0.565768	NA	0.768966	0	0.41427	Serpinf2 Pli	A2AP_MOUSE	Alpha-2-antiplasmin (Alpha-2-AP) (Alpha-2-plasmin inhibitor) (Alpha-2-PI) (Serpin F2)	0.41427	0.214503	0.247362	Q61247
Q9JHK5	Combo-Control	0.213712	0.100402	2.12857	36	0.0402032	0.130905	NA	0.734286	0	1.39574	Plek	PLEK_MOUSE	Pleckstrin	1.39574	0.213712	0.883043	Q9JHK5
P28867	Combo-Control	0.213513	0.111899	1.90809	36	0.0643801	0.175413	NA	0.804444	0	1.19125	Prkcd Pkcd	KPCD_MOUSE	Protein kinase C delta type (EC 2.7.11.13) (Tyrosine-protein kinase PRKCD) (EC 2.7.10.2) (nPKC-delta) [Cleaved into: Protein kinase C delta type regulatory subunit; Protein kinase C delta type catalytic subunit (Sphingosine-dependent protein kinase-1) (SDK1)]	1.19125	0.213513	0.755937	P28867
Q2EMV9	Combo-Control	0.212895	0.147661	1.44178	36	0.158007	0.317121	NA	0.830612	0	0.801323	Parp14 Kiaa1268	PAR14_MOUSE	Protein mono-ADP-ribosyltransferase PARP14 (EC 2.4.2.-) (ADP-ribosyltransferase diphtheria toxin-like 8) (ARTD8) (Collaborator of STAT6) (CoaSt6) (Poly [ADP-ribose] polymerase 14) (PARP-14)	0.801323	0.212895	0.498775	Q2EMV9
Q8K0Z7	Combo-Control	0.212893	0.1602	1.32892	36	0.192236	0.358021	NA	0.603333	0	0.716166	Taco1 Ccdc44	TACO1_MOUSE	Translational activator of cytochrome c oxidase 1 (Coiled-coil domain-containing protein 44) (Translational activator of mitochondrially-encoded cytochrome c oxidase 1)	0.716166	0.212893	0.446091	Q8K0Z7
Q8BVI4	Combo-Control	0.210666	0.106383	1.98026	36	0.0553568	0.159813	NA	0.357143	0	1.25683	Qdpr Dhpr	DHPR_MOUSE	Dihydropteridine reductase (EC 1.5.1.34) (HDHPR) (Quinoid dihydropteridine reductase)	1.25683	0.210666	0.796387	Q8BVI4
Q9DCB8	Combo-Control	0.210217	0.0868428	2.42066	36	0.0206634	0.0860217	NA	0.2	0	1.6848	Isca2 Hbld1	ISCA2_MOUSE	Iron-sulfur cluster assembly 2 homolog, mitochondrial (HESB-like domain-containing protein 1)	1.6848	0.210217	1.06539	Q9DCB8
Q9CXR1	Combo-Control	0.209603	0.148384	1.41257	36	0.16637	0.328204	NA	0.320833	0	0.778926	Dhrs7 Retsdr4	DHRS7_MOUSE	Dehydrogenase/reductase SDR family member 7 (EC 1.1.-.-) (Retinal short-chain dehydrogenase/reductase 4) (retSDR4)	0.778926	0.209603	0.483857	Q9CXR1
Q8BSF4	Combo-Control	0.20951	0.281625	0.743934	1	0.592813	0.742856	NA	0.9	0	0.227082	Pisd	PISD_MOUSE	Phosphatidylserine decarboxylase proenzyme, mitochondrial (EC 4.1.1.65) [Cleaved into: Phosphatidylserine decarboxylase beta chain; Phosphatidylserine decarboxylase alpha chain]	0.227082	0.20951	0.129095	Q8BSF4
Q08857	Combo-Control	0.208821	0.21675	0.963417	36	0.341765	0.523049	NA	0.3875	0	0.466272	Cd36	CD36_MOUSE	Platelet glycoprotein 4 (Glycoprotein IIIb) (GPIIIB) (PAS IV) (PAS-4) (Platelet glycoprotein IV) (GPIV) (CD antigen CD36)	0.466272	0.208821	0.281458	Q08857
P23953	Combo-Control	0.208092	0.251307	0.828036	36	0.413106	0.590812	NA	0.795918	0	0.383938	Ces1c Es1	EST1C_MOUSE	Carboxylesterase 1C (EC 3.1.1.1) (Liver carboxylesterase N) (Lung surfactant convertase) (PES-N)	0.383938	0.208092	0.22855	P23953
Q810U5	Combo-Control	0.207494	0.130722	1.58729	35	0.121441	0.265136	NA	0.225	0	0.915634	Ccdc50	CCD50_MOUSE	Coiled-coil domain-containing protein 50 (Protein Ymer)	0.915634	0.207494	0.576532	Q810U5
Q8VDP2	Combo-Control	0.207228	0.154255	1.34341	32	0.188588	0.354184	NA	0.1	0	0.724486	NA	CX056_MOUSE	UPF0428 protein CXorf56 homolog	0.724486	0.207228	0.450771	Q8VDP2
Q7TSS2	Combo-Control	0.20641	0.388864	0.530803	11	0.606106	0.753059	NA	0.65	0	0.217451	Ube2q1 Ube2q	UB2Q1_MOUSE	Ubiquitin-conjugating enzyme E2 Q1 (EC 2.3.2.23) (E2 ubiquitin-conjugating enzyme Q1) (Galactosyl transferase-associated protein) (GTAP) (Ubiquitin carrier protein Q1) (Ubiquitin-protein ligase Q1)	0.217451	0.20641	0.123171	Q7TSS2
Q8VDV3	Combo-Control	0.20637	0.117844	1.75121	36	0.0884262	0.2157	NA	0	0	1.05342	Rab3il1	R3GEF_MOUSE	Guanine nucleotide exchange factor for Rab-3A (Rab-3A-interacting-like protein 1) (Rab3A-interacting-like protein 1) (Rabin3-like 1)	1.05342	0.20637	0.666149	Q8VDV3
P97443	Combo-Control	0.206293	0.48238	0.427656	23	0.672879	0.800669	NA	0.2	0	0.172063	Smyd1 Bop	SMYD1_MOUSE	Histone-lysine N-methyltransferase Smyd1 (EC 2.1.1.354) (CD8b-opposite) (SET and MYND domain-containing protein 1) (Zinc finger protein BOP) (m-BOP)	0.172063	0.206293	0.096547	P97443
Q8BX70	Combo-Control	0.205355	0.0707371	2.90307	36	0.00627391	0.0401998	NA	0.82963	0	2.20246	Vps13c Kiaa3021	VP13C_MOUSE	Vacuolar protein sorting-associated protein 13C	2.20246	0.205355	1.39578	Q8BX70
Q9DAR7	Combo-Control	0.205173	0.138976	1.47632	36	0.148552	0.30549	NA	0.820588	0	0.828123	Dcps Dcs1 Hint5	DCPS_MOUSE	m7GpppX diphosphatase (EC 3.6.1.59) (DCS-1) (Decapping scavenger enzyme) (Hint-related 7meGMP-directed hydrolase) (Histidine triad nucleotide-binding protein 5) (Histidine triad protein member 5) (HINT-5) (Scavenger mRNA-decapping enzyme DcpS)	0.828123	0.205173	0.515004	Q9DAR7
Q8BK62	Combo-Control	0.205037	0.15376	1.33349	31	0.192088	0.358021	NA	0.6	0	0.7165	Olfml3	OLFL3_MOUSE	Olfactomedin-like protein 3	0.7165	0.205037	0.446091	Q8BK62
P06797	Combo-Control	0.204988	0.130618	1.56937	36	0.125311	0.270967	NA	0.679167	0	0.902009	Ctsl Ctsl1	CATL1_MOUSE	Cathepsin L1 (EC 3.4.22.15) (Cathepsin L) (Major excreted protein) (MEP) (p39 cysteine proteinase) [Cleaved into: Cathepsin L1 heavy chain; Cathepsin L1 light chain]	0.902009	0.204988	0.567083	P06797
O88653	Combo-Control	0.20466	0.121758	1.68088	36	0.101445	0.237256	NA	0.3875	0	0.99377	Lamtor3 Map2k1ip1 Mapbp Mapksp1	LTOR3_MOUSE	Ragulator complex protein LAMTOR3 (Late endosomal/lysosomal adaptor and MAPK and MTOR activator 3) (MEK-binding partner 1) (Mp1) (Mitogen-activated protein kinase kinase 1-interacting protein 1) (Mitogen-activated protein kinase scaffold protein 1)	0.99377	0.20466	0.624783	O88653
Q9JL15	Combo-Control	0.204078	0.108566	1.87977	36	0.068252	0.18181	NA	0.45	0	1.16588	Lgals8	LEG8_MOUSE	Galectin-8 (Gal-8) (LGALS-8)	1.16588	0.204078	0.740382	Q9JL15
Q9CPV4	Combo-Control	0.204022	0.11066	1.84368	36	0.0734742	0.190694	NA	0.791667	0	1.13386	Glod4	GLOD4_MOUSE	Glyoxalase domain-containing protein 4	1.13386	0.204022	0.719664	Q9CPV4
Q9ESB3	Combo-Control	0.20399	0.178404	1.14342	36	0.260412	0.437074	NA	0.803922	0	0.584339	Hrg	HRG_MOUSE	Histidine-rich glycoprotein (Histidine-proline-rich glycoprotein) (HPRG)	0.584339	0.20399	0.359445	Q9ESB3
P05201	Combo-Control	0.203518	0.144865	1.40488	36	0.168627	0.331602	NA	0.873077	0	0.773073	Got1	AATC_MOUSE	Aspartate aminotransferase, cytoplasmic (cAspAT) (EC 2.6.1.1) (EC 2.6.1.3) (Cysteine aminotransferase, cytoplasmic) (Cysteine transaminase, cytoplasmic) (cCAT) (Glutamate oxaloacetate transaminase 1) (Transaminase A)	0.773073	0.203518	0.479383	P05201
Q9JLV6	Combo-Control	0.203415	0.0594428	3.42204	36	0.00156359	0.0171876	NA	0.70303	0	2.80588	Pnkp	PNKP_MOUSE	Bifunctional polynucleotide phosphatase/kinase (DNA 5'-kinase/3'-phosphatase) (Polynucleotide kinase-3'-phosphatase) [Includes: Polynucleotide 3'-phosphatase (EC 3.1.3.32) (2'(3')-polynucleotidase); Polynucleotide 5'-hydroxyl-kinase (EC 2.7.1.78)]	2.80588	0.203415	1.76478	Q9JLV6
Q9QXC1	Combo-Control	0.203244	0.21755	0.934244	36	0.356403	0.536024	NA	0.5	0	0.448059	Fetub	FETUB_MOUSE	Fetuin-B (Fetuin-like protein IRL685)	0.448059	0.203244	0.270816	Q9QXC1
Q63810	Combo-Control	0.202639	0.0787946	2.57174	36	0.0143935	0.0679166	NA	0.511765	0	1.84183	Ppp3r1 Cnb	CANB1_MOUSE	Calcineurin subunit B type 1 (Protein phosphatase 2B regulatory subunit 1) (Protein phosphatase 3 regulatory subunit B alpha isoform 1)	1.84183	0.202639	1.16802	Q63810
P33174	Combo-Control	0.202382	0.143826	1.40713	36	0.167965	0.33045	NA	0.205	0	0.774781	Kif4 Kif4a Kns4	KIF4_MOUSE	Chromosome-associated kinesin KIF4 (Chromokinesin)	0.774781	0.202382	0.480894	P33174
P68368	Combo-Control	0.201129	0.284774	0.706273	36	0.484564	0.655037	NA	0.75	0	0.314648	Tuba4a Tuba4	TBA4A_MOUSE	Tubulin alpha-4A chain (Alpha-tubulin 4) (Alpha-tubulin isotype M-alpha-4) (Tubulin alpha-4 chain)	0.314648	0.201129	0.183734	P68368
P14106	Combo-Control	0.201075	0.0732555	2.74484	36	0.00938454	0.0518418	NA	0.444444	0	2.02759	C1qb	C1QB_MOUSE	Complement C1q subcomponent subunit B	2.02759	0.201075	1.28532	P14106
Q9CYZ2	Combo-Control	0.200224	0.0827515	2.41958	36	0.0207159	0.0860755	NA	0.721429	0	1.6837	Tpd52l2	TPD54_MOUSE	Tumor protein D54 (Tumor protein D52-like 2)	1.6837	0.200224	1.06512	Q9CYZ2
A6H8H2	Combo-Control	0.199976	0.0737098	2.71301	36	0.010163	0.0546135	NA	0.275	0	1.99298	Dennd4c	DEN4C_MOUSE	DENN domain-containing protein 4C	1.99298	0.199976	1.2627	A6H8H2
Q3TBD2	Combo-Control	0.199792	0.121235	1.64798	36	0.108059	0.246787	NA	0.70625	0	0.966337	Arhgap45 Hmha1	HMHA1_MOUSE	Rho GTPase-activating protein 45 (Minor histocompatibility protein HA-1)	0.966337	0.199792	0.607677	Q3TBD2
Q0VAW7	Combo-Control	0.199626	0.285978	0.698047	17	0.494586	0.66386	NA	0.4	0	0.305758	Znf112 Zfp112	ZN112_MOUSE	Zinc finger protein 112 (Zfp-112)	0.305758	0.199626	0.177924	Q0VAW7
Q8CAS9	Combo-Control	0.199029	0.11959	1.66427	36	0.104741	0.24132	NA	0.778889	0	0.979883	Parp9 Bal	PARP9_MOUSE	Protein mono-ADP-ribosyltransferase PARP9 (EC 2.4.2.-) (ADP-ribosyltransferase diphtheria toxin-like 9) (ARTD9) (B aggressive lymphoma protein homolog) (Poly [ADP-ribose] polymerase 9) (PARP-9)	0.979883	0.199029	0.617406	Q8CAS9
Q91YP3	Combo-Control	0.198953	0.0802937	2.47782	36	0.0180455	0.0782752	NA	0.21875	0	1.74363	Dera	DEOC_MOUSE	Deoxyribose-phosphate aldolase (DERA) (EC 4.1.2.4) (2-deoxy-D-ribose 5-phosphate aldolase) (Phosphodeoxyriboaldolase) (Deoxyriboaldolase)	1.74363	0.198953	1.10638	Q91YP3
Q5IRJ6	Combo-Control	0.198728	0.363202	0.547155	10	0.59627	0.745988	NA	0.6	0	0.224557	Slc30a9	ZNT9_MOUSE	Zinc transporter 9 (ZnT-9) (GRIP1-associated coactivator 63) (GAC63) (Solute carrier family 30 member 9)	0.224557	0.198728	0.127268	Q5IRJ6
P61226	Combo-Control	0.198286	0.0698819	2.83745	36	0.00742382	0.0447622	NA	0.025	0	2.12937	Rap2b	RAP2B_MOUSE	Ras-related protein Rap-2b	2.12937	0.198286	1.34909	P61226
Q9JKK1	Combo-Control	0.197924	0.0846503	2.33814	31	0.026008	0.0987121	NA	0.1	0	1.58489	Stx6	STX6_MOUSE	Syntaxin-6	1.58489	0.197924	1.00563	Q9JKK1
Q8BXQ2	Combo-Control	0.197554	0.216344	0.913149	33	0.367788	0.548398	NA	0.705556	0	0.434403	Pigt Ndap7	PIGT_MOUSE	GPI transamidase component PIG-T (Neuronal development-associated protein 7) (Phosphatidylinositol-glycan biosynthesis class T protein)	0.434403	0.197554	0.260904	Q8BXQ2
Q60631	Combo-Control	0.197367	0.0931776	2.11818	36	0.0411308	0.132087	NA	0.631481	0	1.38583	Grb2	GRB2_MOUSE	Growth factor receptor-bound protein 2 (Adapter protein GRB2) (SH2/SH3 adapter GRB2)	1.38583	0.197367	0.879139	Q60631
P11928	Combo-Control	0.196681	0.102988	1.90975	36	0.0641591	0.174987	NA	0.586364	0	1.19274	Oas1a Oias1	OAS1A_MOUSE	2'-5'-oligoadenylate synthase 1A ((2-5')oligo(A) synthase 1A) (2-5A synthase 1A) (EC 2.7.7.84) (p42 OAS)	1.19274	0.196681	0.756995	P11928
Q922R5	Combo-Control	0.196526	0.54896	0.357997	5	0.734963	0.846699	NA	0.7	0	0.133735	Ppp4r3b Kiaa1387 Pp4r3b Smek2	P4R3B_MOUSE	Serine/threonine-protein phosphatase 4 regulatory subunit 3B (SMEK homolog 2)	0.133735	0.196526	0.0722711	Q922R5
Q61884	Combo-Control	0.196316	0.135063	1.45351	36	0.154744	0.313826	NA	0	0	0.810385	Mns1	MNS1_MOUSE	Meiosis-specific nuclear structural protein 1	0.810385	0.196316	0.503312	Q61884
E9PV24	Combo-Control	0.194202	0.221991	0.874822	36	0.38747	0.567227	NA	0.933333	0	0.411762	Fga	FIBA_MOUSE	Fibrinogen alpha chain [Cleaved into: Fibrinopeptide A; Fibrinogen alpha chain]	0.411762	0.194202	0.246243	E9PV24
Q640N3	Combo-Control	0.19404	0.161977	1.19795	33	0.239469	0.41591	NA	0.166667	0	0.62075	Arhgap30	RHG30_MOUSE	Rho GTPase-activating protein 30 (Rho-type GTPase-activating protein 30)	0.62075	0.19404	0.381001	Q640N3
Q9QX60	Combo-Control	0.193976	0.178468	1.0869	35	0.284511	0.463545	NA	0.05	0	0.5459	Dguok Dgk	DGUOK_MOUSE	Deoxyguanosine kinase, mitochondrial (dGK) (EC 2.7.1.113)	0.5459	0.193976	0.333908	Q9QX60
Q8K183	Combo-Control	0.193892	0.100404	1.93111	36	0.0613731	0.171041	NA	0.884483	0	1.21202	Pdxk Pkh	PDXK_MOUSE	Pyridoxal kinase (EC 2.7.1.35) (Pyridoxine kinase)	1.21202	0.193892	0.766899	Q8K183
Q99LJ6	Combo-Control	0.193365	0.205805	0.939555	35	0.353885	0.534368	NA	0	0	0.451137	Gpx7	GPX7_MOUSE	Glutathione peroxidase 7 (GPx-7) (GSHPx-7) (EC 1.11.1.9)	0.451137	0.193365	0.27216	Q99LJ6
P20491	Combo-Control	0.193192	0.139967	1.38027	36	0.176015	0.34036	NA	0.481579	0	0.754451	Fcer1g Fce1g	FCERG_MOUSE	High affinity immunoglobulin epsilon receptor subunit gamma (Fc receptor gamma-chain) (FcRgamma) (Fc-epsilon RI-gamma) (IgE Fc receptor subunit gamma) (FceRI gamma)	0.754451	0.193192	0.468062	P20491
P08071	Combo-Control	0.193154	0.165642	1.16609	36	0.251245	0.427807	NA	0.955556	0	0.599902	Ltf	TRFL_MOUSE	Lactotransferrin (Lactoferrin) (EC 3.4.21.-)	0.599902	0.193154	0.368753	P08071
Q8R2S8	Combo-Control	0.192833	0.16935	1.13867	36	0.262363	0.439064	NA	0.822115	0	0.581097	Cd177	CD177_MOUSE	CD177 antigen (CD antigen CD177)	0.581097	0.192833	0.357472	Q8R2S8
P28076	Combo-Control	0.191679	0.166802	1.14914	36	0.258076	0.434496	NA	0.84127	0	0.588253	Psmb9 Lmp2 Ring12	PSB9_MOUSE	Proteasome subunit beta type-9 (EC 3.4.25.1) (LMP-2d) (Low molecular mass protein 2) (Macropain chain 7) (Multicatalytic endopeptidase complex chain 7) (Proteasome chain 7) (Proteasome subunit beta-1i) (Really interesting new gene 12 protein)	0.588253	0.191679	0.362014	P28076
Q5SSL4	Combo-Control	0.191071	0.104542	1.8277	36	0.0758927	0.194755	NA	0.604545	0	1.1198	Abr	ABR_MOUSE	Active breakpoint cluster region-related protein	1.1198	0.191071	0.71051	Q5SSL4
P62814	Combo-Control	0.191047	0.0920096	2.07638	36	0.0450574	0.140042	NA	0.897959	0	1.34623	Atp6v1b2 Atp6b2 Vat2	VATB2_MOUSE	V-type proton ATPase subunit B, brain isoform (V-ATPase subunit B 2) (Endomembrane proton pump 58 kDa subunit) (Vacuolar proton pump subunit B 2)	1.34623	0.191047	0.85374	P62814
Q7TSI3	Combo-Control	0.190677	0.218798	0.871477	28	0.390905	0.570908	NA	0.475	0	0.407928	Ppp6r1 Kiaa1115 Pp6r1 Saps1	PP6R1_MOUSE	Serine/threonine-protein phosphatase 6 regulatory subunit 1 (SAPS domain family member 1)	0.407928	0.190677	0.243434	Q7TSI3
P61022	Combo-Control	0.190044	0.0993661	1.91256	36	0.063786	0.17449	NA	0.59	0	1.19527	Chp1 Chp Sid470	CHP1_MOUSE	Calcineurin B homologous protein 1 (Calcineurin B-like protein) (Calcium-binding protein CHP) (Calcium-binding protein p22) (EF-hand calcium-binding domain-containing protein p22) (Sid 470) (p24)	1.19527	0.190044	0.758229	P61022
P35276	Combo-Control	0.189988	0.0885248	2.14615	35	0.0388738	0.128015	NA	0.05	0	1.41034	Rab3d	RAB3D_MOUSE	Ras-related protein Rab-3D	1.41034	0.189988	0.892739	P35276
Q8C147	Combo-Control	0.189852	0.175708	1.0805	35	0.28731	0.466704	NA	0.308333	0	0.541649	Dock8	DOCK8_MOUSE	Dedicator of cytokinesis protein 8	0.541649	0.189852	0.330958	Q8C147
Q60739	Combo-Control	0.189661	0.118702	1.59779	36	0.118832	0.261564	NA	0.579412	0	0.925067	Bag1	BAG1_MOUSE	BAG family molecular chaperone regulator 1 (BAG-1) (Bcl-2-associated athanogene 1)	0.925067	0.189661	0.582422	Q60739
P23298	Combo-Control	0.188997	0.142668	1.32473	36	0.193609	0.359559	NA	0	0	0.713075	Prkch Pkch	KPCL_MOUSE	Protein kinase C eta type (EC 2.7.11.13) (PKC-L) (nPKC-eta)	0.713075	0.188997	0.444229	P23298
P29452	Combo-Control	0.188639	0.124307	1.51753	36	0.137867	0.29031	NA	0.846154	0	0.86054	Casp1 Il1bc	CASP1_MOUSE	Caspase-1 (CASP-1) (EC 3.4.22.36) (Interleukin-1 beta convertase) (IL-1BC) (Interleukin-1 beta-converting enzyme) (ICE) (IL-1 beta-converting enzyme) (p45) [Cleaved into: Caspase-1 subunit p20; Caspase-1 subunit p10]	0.86054	0.188639	0.537139	P29452
Q9JL26	Combo-Control	0.188165	0.10377	1.81329	36	0.0781311	0.19833	NA	0.775	0	1.10718	Fmnl1 Frl Frl1	FMNL1_MOUSE	Formin-like protein 1 (Formin-related protein)	1.10718	0.188165	0.702611	Q9JL26
Q99MU3	Combo-Control	0.188023	0.124029	1.51596	35	0.13851	0.291209	NA	0.45	0	0.858518	Adar	DSRAD_MOUSE	Double-stranded RNA-specific adenosine deaminase (DRADA) (EC 3.5.4.37) (RNA adenosine deaminase 1)	0.858518	0.188023	0.535795	Q99MU3
Q9CR00	Combo-Control	0.18794	0.0796937	2.35828	36	0.0239104	0.0943757	NA	0.713636	0	1.62141	Psmd9	PSMD9_MOUSE	26S proteasome non-ATPase regulatory subunit 9 (26S proteasome regulatory subunit p27)	1.62141	0.18794	1.02514	Q9CR00
A2A935	Combo-Control	0.187673	0.244414	0.767851	36	0.447583	0.622687	NA	0	0	0.349126	Prdm16 Kiaa1675 Mel1	PRD16_MOUSE	Histone-lysine N-methyltransferase PRDM16 (EC 2.1.1.-) (PR domain zinc finger protein 16) (PR domain-containing protein 16) (Transcription factor MEL1) (MDS1/EVI1-like gene 1)	0.349126	0.187673	0.20573	A2A935
Q8BG95	Combo-Control	0.187531	0.135856	1.38036	33	0.176755	0.341228	NA	0.625	0	0.752629	Ppp1r12b Mypt2	MYPT2_MOUSE	Protein phosphatase 1 regulatory subunit 12B (Myosin phosphatase-targeting subunit 2) (Myosin phosphatase target subunit 2)	0.752629	0.187531	0.466956	Q8BG95
Q7TQ48	Combo-Control	0.186868	0.639088	0.292398	25	0.772395	0.871101	NA	0.832609	0	0.112161	Srl Sar	SRCA_MOUSE	Sarcalumenin	0.112161	0.186868	0.0599314	Q7TQ48
P32020	Combo-Control	0.186821	0.0934651	1.99883	36	0.0532212	0.15556	NA	0.72973	0	1.27392	Scp2 Scp-2	NLTP_MOUSE	Non-specific lipid-transfer protein (NSL-TP) (EC 2.3.1.176) (Propanoyl-CoA C-acyltransferase) (SCP-chi) (SCPX) (Sterol carrier protein 2) (SCP-2) (Sterol carrier protein X) (SCP-X)	1.27392	0.186821	0.808103	P32020
Q9ERI2	Combo-Control	0.186523	0.121187	1.53913	36	0.132517	0.282607	NA	0	0	0.877729	Rab27a	RB27A_MOUSE	Ras-related protein Rab-27A (EC 3.6.5.2)	0.877729	0.186523	0.548817	Q9ERI2
O35664	Combo-Control	0.185762	0.192386	0.965569	31	0.341733	0.523049	NA	0.1	0	0.466313	Ifnar2	INAR2_MOUSE	Interferon alpha/beta receptor 2 (IFN-R-2) (IFN-alpha/beta receptor 2) (Type I interferon receptor 2)	0.466313	0.185762	0.281458	O35664
Q8VC88	Combo-Control	0.185518	0.231183	0.802473	30	0.428591	0.60492	NA	0.15	0	0.367957	Gca	GRAN_MOUSE	Grancalcin	0.367957	0.185518	0.218302	Q8VC88
Q8R4Y4	Combo-Control	0.185439	0.151958	1.22033	36	0.230273	0.40538	NA	0.0944444	0	0.637757	Stab1 Feel1	STAB1_MOUSE	Stabilin-1 (Fasciclin, EGF-like, laminin-type EGF-like and link domain-containing scavenger receptor 1) (FEEL-1)	0.637757	0.185439	0.392138	Q8R4Y4
P17439	Combo-Control	0.185356	0.115538	1.60428	36	0.11739	0.26032	NA	0.05	0	0.93037	Gba	GLCM_MOUSE	Lysosomal acid glucosylceramidase (Lysosomal acid GCase) (EC 3.2.1.45) (Acid beta-glucosidase) (Beta-glucocerebrosidase) (Cholesterol glucosyltransferase) (SGTase) (EC 2.4.1.-) (Cholesteryl-beta-glucosidase) (EC 3.2.1.104) (D-glucosyl-N-acylsphingosine glucohydrolase)	0.93037	0.185356	0.584493	P17439
P62077	Combo-Control	0.185289	0.114835	1.61353	36	0.115362	0.258475	NA	0	0	0.937937	Timm8b Ddp2 Tim8b	TIM8B_MOUSE	Mitochondrial import inner membrane translocase subunit Tim8 B (Deafness dystonia protein 2 homolog)	0.937937	0.185289	0.587581	P62077
Q61702	Combo-Control	0.185125	0.127511	1.45183	36	0.155209	0.314474	NA	0.815556	0	0.809083	Itih1	ITIH1_MOUSE	Inter-alpha-trypsin inhibitor heavy chain H1 (ITI heavy chain H1) (ITI-HC1) (Inter-alpha-inhibitor heavy chain 1)	0.809083	0.185125	0.502416	Q61702
Q99PL5	Combo-Control	0.184335	0.0716619	2.57228	36	0.0143746	0.0679155	NA	0.972452	0	1.84241	Rrbp1	RRBP1_MOUSE	Ribosome-binding protein 1 (Ribosome receptor protein) (RRp) (mRRp)	1.84241	0.184335	1.16803	Q99PL5
P11247	Combo-Control	0.184153	0.154402	1.19268	36	0.240795	0.417236	NA	0.928929	0	0.618352	Mpo	PERM_MOUSE	Myeloperoxidase (MPO) (EC 1.11.2.2) [Cleaved into: Myeloperoxidase light chain; Myeloperoxidase heavy chain]	0.618352	0.184153	0.379618	P11247
P51863	Combo-Control	0.184112	0.0858868	2.14366	36	0.038888	0.128015	NA	0.819091	0	1.41018	Atp6v0d1 Atp6d	VA0D1_MOUSE	V-type proton ATPase subunit d 1 (V-ATPase subunit d 1) (P39) (Physophilin) (V-ATPase 40 kDa accessory protein) (V-ATPase AC39 subunit) (Vacuolar proton pump subunit d 1)	1.41018	0.184112	0.892739	P51863
P28574	Combo-Control	0.183727	0.150309	1.22233	32	0.230512	0.40538	NA	0.1	0	0.637307	Max Myn	MAX_MOUSE	Protein max (Myc-associated factor X) (Myc-binding novel HLH/LZ protein) (Protein myn)	0.637307	0.183727	0.392138	P28574
Q9CSU0	Combo-Control	0.182965	0.102279	1.78888	36	0.0820512	0.204751	NA	0.473684	0	1.08592	Rprd1b Crept	RPR1B_MOUSE	Regulation of nuclear pre-mRNA domain-containing protein 1B (Cell cycle-related and expression-elevated protein in tumor)	1.08592	0.182965	0.688775	Q9CSU0
Q9D967	Combo-Control	0.182516	0.114238	1.59769	36	0.118854	0.261564	NA	0.514706	0	0.924985	Mdp1	MGDP1_MOUSE	Magnesium-dependent phosphatase 1 (MDP-1) (EC 3.1.3.-) (EC 3.1.3.48)	0.924985	0.182516	0.582422	Q9D967
Q5KU39	Combo-Control	0.182445	0.163308	1.11718	31	0.272501	0.451403	NA	0.15	0	0.564632	Vps41	VPS41_MOUSE	Vacuolar protein sorting-associated protein 41 homolog (VAM2 homolog) (mVAM2)	0.564632	0.182445	0.345436	Q5KU39
Q9WVL0	Combo-Control	0.182394	0.158473	1.15095	36	0.257342	0.433596	NA	0.222727	0	0.58949	Gstz1 Maai	MAAI_MOUSE	Maleylacetoacetate isomerase (MAAI) (EC 5.2.1.2) (GSTZ1-1) (Glutathione S-transferase zeta 1) (EC 2.5.1.18)	0.58949	0.182394	0.362914	Q9WVL0
Q9D938	Combo-Control	0.181469	0.330589	0.548927	19	0.589449	0.740349	NA	0.45	0	0.229554	Tmem160	TM160_MOUSE	Transmembrane protein 160	0.229554	0.181469	0.130563	Q9D938
Q62426	Combo-Control	0.181212	0.141622	1.27955	36	0.20889	0.378547	NA	0.855072	0	0.680083	Cstb Cst6 Stfb	CYTB_MOUSE	Cystatin-B (Stefin-B)	0.680083	0.181212	0.42188	Q62426
Q99KJ8	Combo-Control	0.179962	0.0753186	2.38935	36	0.0222396	0.0903314	NA	0.863699	0	1.65287	Dctn2	DCTN2_MOUSE	Dynactin subunit 2 (50 kDa dynein-associated polypeptide) (Dynactin complex 50 kDa subunit) (DCTN-50) (Growth cone membrane protein 23-48K) (GMP23-48K) (p50 dynamitin)	1.65287	0.179962	1.04416	Q99KJ8
Q3U0K8	Combo-Control	0.179742	0.765297	0.234866	1	0.853141	0.915465	NA	0.85	0	0.068979	Ogfod1 Kiaa1612	OGFD1_MOUSE	Prolyl 3-hydroxylase OGFOD1 (EC 1.14.11.-) (2-oxoglutarate and iron-dependent oxygenase domain-containing protein 1) (uS12 prolyl 3-hydroxylase)	0.068979	0.179742	0.0383581	Q3U0K8
Q9Z1Q2	Combo-Control	0.179661	0.164477	1.09232	36	0.281951	0.460588	NA	0.12	0	0.549827	Abhd16a Bat5 Ng26	ABHGA_MOUSE	Phosphatidylserine lipase ABHD16A (EC 3.1.-.-) (Alpha/beta hydrolase domain-containing protein 16A) (Abhydrolase domain-containing protein 16A) (HLA-B-associated transcript 5) (mBAT5) (Monoacylglycerol lipase ABHD16A) (EC 3.1.1.23)	0.549827	0.179661	0.336688	Q9Z1Q2
Q99L43	Combo-Control	0.178805	0.17478	1.02303	33	0.313737	0.493567	NA	0.05	0	0.503435	Cds2	CDS2_MOUSE	Phosphatidate cytidylyltransferase 2 (EC 2.7.7.41) (CDP-DAG synthase 2) (CDP-DG synthase 2) (CDP-diacylglycerol synthase 2) (CDS 2) (CDP-diglyceride pyrophosphorylase 2) (CDP-diglyceride synthase 2) (CTP:phosphatidate cytidylyltransferase 2)	0.503435	0.178805	0.306654	Q99L43
P46938	Combo-Control	0.178646	0.164812	1.08394	34	0.286017	0.465064	NA	0.31875	0	0.543608	Yap1 Yap Yap65	YAP1_MOUSE	Transcriptional coactivator YAP1 (Yes-associated protein 1) (Protein yorkie homolog) (Yes-associated protein YAP65 homolog)	0.543608	0.178646	0.332487	P46938
Q61703	Combo-Control	0.178223	0.139234	1.28003	36	0.208722	0.378402	NA	0.782222	0	0.680431	Itih2	ITIH2_MOUSE	Inter-alpha-trypsin inhibitor heavy chain H2 (ITI heavy chain H2) (ITI-HC2) (Inter-alpha-inhibitor heavy chain 2)	0.680431	0.178223	0.422047	Q61703
Q9R0M6	Combo-Control	0.177992	0.0726435	2.45021	36	0.0192699	0.0821904	NA	0	0	1.71512	Rab9a Rab9 Sid99	RAB9A_MOUSE	Ras-related protein Rab-9A (Sid 99)	1.71512	0.177992	1.08518	Q9R0M6
P14234	Combo-Control	0.177821	0.171742	1.0354	36	0.307388	0.487821	NA	0	0	0.512314	Fgr	FGR_MOUSE	Tyrosine-protein kinase Fgr (EC 2.7.10.2) (Proto-oncogene c-Fgr) (p55-Fgr)	0.512314	0.177821	0.31174	P14234
Q9R1Z8	Combo-Control	0.177502	0.849482	0.208953	8	0.839707	0.906291	NA	0.65	0	0.075872	Sorbs3 Scam1 Sh3d4	VINEX_MOUSE	Vinexin (SH3 domain-containing protein SH3P3) (SH3-containing adapter molecule 1) (SCAM-1) (Sorbin and SH3 domain-containing protein 3)	0.075872	0.177502	0.0427323	Q9R1Z8
Q6P549	Combo-Control	0.177364	0.18692	0.948878	36	0.34901	0.52949	NA	0.616667	0	0.457163	Inppl1 Ship2	SHIP2_MOUSE	Phosphatidylinositol 3,4,5-trisphosphate 5-phosphatase 2 (EC 3.1.3.86) (AblSH3-binding protein) (Inositol polyphosphate phosphatase-like protein 1) (INPPL-1) (SH2 domain-containing inositol 5'-phosphatase 2) (SH2 domain-containing inositol phosphatase 2) (SHIP-2)	0.457163	0.177364	0.276142	Q6P549
Q9CQJ6	Combo-Control	0.177214	0.177959	0.995813	35	0.326176	0.507437	NA	0.19	0	0.486548	Denr	DENR_MOUSE	Density-regulated protein (DRP)	0.486548	0.177214	0.294618	Q9CQJ6
Q91W89	Combo-Control	0.177194	0.142717	1.24158	35	0.222649	0.395882	NA	0.603333	0	0.652379	Man2c1	MA2C1_MOUSE	Alpha-mannosidase 2C1 (EC 3.2.1.24) (Alpha-D-mannoside mannohydrolase) (Mannosidase alpha class 2C member 1) (Neutral/cytosolic alpha-mannosidase)	0.652379	0.177194	0.402434	Q91W89
P25085	Combo-Control	0.176802	0.239922	0.736914	21	0.469328	0.642036	NA	0.775	0	0.328523	Il1rn Il-1ra	IL1RA_MOUSE	Interleukin-1 receptor antagonist protein (IL-1RN) (IL-1ra) (IRAP) (IL1 inhibitor)	0.328523	0.176802	0.19244	P25085
P48193	Combo-Control	0.176557	0.170841	1.03346	36	0.308283	0.488305	NA	0.21875	0	0.51105	Epb41 Epb4.1 Kiaa4056	41_MOUSE	Protein 4.1 (P4.1) (4.1R) (Band 4.1)	0.51105	0.176557	0.311309	P48193
P59108	Combo-Control	0.176394	0.0876071	2.01347	36	0.0515879	0.152793	NA	0.65	0	1.28745	Cpne2	CPNE2_MOUSE	Copine-2 (Copine II)	1.28745	0.176394	0.815896	P59108
Q80ZW2	Combo-Control	0.176119	0.141563	1.2441	36	0.221501	0.394486	NA	0.6	0	0.654625	Them6	THEM6_MOUSE	Protein THEM6	0.654625	0.176119	0.403969	Q80ZW2
Q3UMU9	Combo-Control	0.175883	0.147173	1.19507	36	0.239872	0.416443	NA	0.759259	0	0.620021	Hdgfl2 Hdgfrp2	HDGR2_MOUSE	Hepatoma-derived growth factor-related protein 2 (HRP-2)	0.620021	0.175883	0.380445	Q3UMU9
P01868	Combo-Control	0.175767	0.179248	0.980583	36	0.333343	0.51563	NA	0.834167	0	0.477109	NA	NA	NA	0.477109	0.175767	0.287662	P01868;P01869
O08539	Combo-Control	0.175454	0.0987434	1.77687	36	0.0840405	0.208517	NA	0.859848	0	1.07551	Bin1 Amphl Sh3p9	BIN1_MOUSE	Myc box-dependent-interacting protein 1 (Amphiphysin II) (Amphiphysin-like protein) (Bridging integrator 1) (SH3 domain-containing protein 9)	1.07551	0.175454	0.680859	O08539
Q8R143	Combo-Control	0.175345	0.113175	1.54933	36	0.130051	0.278168	NA	0	0	0.885887	Pttg1ip	PTTG_MOUSE	Pituitary tumor-transforming gene 1 protein-interacting protein (Pituitary tumor-transforming gene protein-binding factor) (PBF) (PTTG-binding factor)	0.885887	0.175345	0.555693	Q8R143
Q9Z172	Combo-Control	0.175139	0.0983118	1.78146	36	0.0832754	0.207091	NA	0.145455	0	1.07948	Sumo3 Smt3a Smt3h1	SUMO3_MOUSE	Small ubiquitin-related modifier 3 (SUMO-3) (SMT3 homolog 1) (Ubiquitin-like protein SMT3A) (Smt3A)	1.07948	0.175139	0.683838	Q9Z172
P32848	Combo-Control	0.174914	0.818497	0.213702	26	0.832446	0.902691	NA	0.724138	0	0.0796437	Pvalb Pva	PRVA_MOUSE	Parvalbumin alpha	0.0796437	0.174914	0.0444609	P32848
P26262	Combo-Control	0.17447	0.165663	1.05316	36	0.299284	0.479128	NA	0.544444	0	0.523916	Klkb1 Klk3 Pk	KLKB1_MOUSE	Plasma kallikrein (EC 3.4.21.34) (Fletcher factor) (Kininogenin) (Plasma prekallikrein) [Cleaved into: Plasma kallikrein heavy chain; Plasma kallikrein light chain]	0.523916	0.17447	0.319548	P26262
Q8BVE3	Combo-Control	0.174314	0.0683732	2.54945	36	0.0151931	0.070179	NA	0.631481	0	1.81835	Atp6v1h	VATH_MOUSE	V-type proton ATPase subunit H (V-ATPase subunit H) (Vacuolar proton pump subunit H)	1.81835	0.174314	1.15379	Q8BVE3
P22682	Combo-Control	0.174229	0.069	2.52505	36	0.0161145	0.0729607	NA	0.702381	0	1.79278	Cbl	CBL_MOUSE	E3 ubiquitin-protein ligase CBL (EC 2.3.2.27) (Casitas B-lineage lymphoma proto-oncogene) (Proto-oncogene c-Cbl) (RING-type E3 ubiquitin transferase CBL) (Signal transduction protein CBL)	1.79278	0.174229	1.13691	P22682
Q9Z2L7	Combo-Control	0.173989	0.0713298	2.43921	36	0.0197782	0.0835603	NA	0.216667	0	1.70381	Crlf3 Creme9 Cytor4	CRLF3_MOUSE	Cytokine receptor-like factor 3 (Cytokine receptor-like molecule 9) (CREME-9) (Cytokine receptor-related factor 4)	1.70381	0.173989	1.078	Q9Z2L7
O35954	Combo-Control	0.173818	0.126263	1.37663	36	0.177129	0.341516	NA	0	0	0.751711	Pitpnm1 Dres9 Mpt1 Nir2 Pitpnm	PITM1_MOUSE	Membrane-associated phosphatidylinositol transfer protein 1 (Drosophila retinal degeneration B homolog 1) (RdgB1) (Mpt-1) (Phosphatidylinositol transfer protein, membrane-associated 1) (PITPnm 1) (Pyk2 N-terminal domain-interacting receptor 2) (NIR-2)	0.751711	0.173818	0.466589	O35954
O88792	Combo-Control	0.173709	0.133645	1.29978	35	0.202172	0.371278	NA	0	0	0.694278	F11r Jam1 Jcam Jcam1	JAM1_MOUSE	Junctional adhesion molecule A (JAM-A) (Junctional adhesion molecule 1) (JAM-1) (CD antigen CD321)	0.694278	0.173709	0.430301	O88792
Q6Q899	Combo-Control	0.173248	0.100979	1.71568	36	0.0948163	0.225956	NA	0.9	0	1.02312	Ddx58	DDX58_MOUSE	Antiviral innate immune response receptor RIG-I (DEAD box protein 58) (Probable ATP-dependent RNA helicase DDX58) (EC 3.6.4.13) (RIG-I-like receptor 1) (RLR-1) (Retinoic acid-inducible gene 1 protein) (RIG-1) (Retinoic acid-inducible gene I protein) (RIG-I)	1.02312	0.173248	0.645976	Q6Q899
Q9CQI3	Combo-Control	0.173057	0.0825473	2.09646	36	0.0431315	0.136201	NA	0.5875	0	1.36521	Gmfb	GMFB_MOUSE	Glia maturation factor beta (GMF-beta)	1.36521	0.173057	0.865818	Q9CQI3
P45878	Combo-Control	0.17292	0.123758	1.39725	36	0.170892	0.334542	NA	0.565217	0	0.767278	Fkbp2 Fkbp13	FKBP2_MOUSE	Peptidyl-prolyl cis-trans isomerase FKBP2 (PPIase FKBP2) (EC 5.2.1.8) (13 kDa FK506-binding protein) (13 kDa FKBP) (FKBP-13) (FK506-binding protein 2) (FKBP-2) (Immunophilin FKBP13) (Rotamase)	0.767278	0.17292	0.47555	P45878
Q8R5F7	Combo-Control	0.17282	0.117134	1.47541	36	0.148797	0.305762	NA	0.423529	0	0.827406	Ifih1	IFIH1_MOUSE	Interferon-induced helicase C domain-containing protein 1 (EC 3.6.4.13) (Helicase with 2 CARD domains) (Helicard) (Interferon induced with helicase C domain protein 1) (Melanoma differentiation-associated protein 5) (MDA-5) (RIG-I-like receptor 2) (RLR-2)	0.827406	0.17282	0.514616	Q8R5F7
O35405	Combo-Control	0.171658	0.10446	1.64329	36	0.10903	0.248378	NA	0.0666667	0	0.962454	Pld3 Sam9	PLD3_MOUSE	5'-3' exonuclease PLD3 (EC 3.1.16.1) (Choline phosphatase 3) (Phosphatidylcholine-hydrolyzing phospholipase D3) (Phospholipase D3) (PLD 3) (Schwannoma-associated protein 9) (SAM-9)	0.962454	0.171658	0.604887	O35405
P27601	Combo-Control	0.170605	0.0978475	1.74359	36	0.0897669	0.217869	NA	0.792105	0	1.04688	Gna13 Gna-13	GNA13_MOUSE	Guanine nucleotide-binding protein subunit alpha-13 (G alpha-13) (G-protein subunit alpha-13)	1.04688	0.170605	0.661804	P27601
Q5SVR0	Combo-Control	0.170379	0.123172	1.38325	36	0.175106	0.33988	NA	0	0	0.756699	Tbc1d9b Kiaa0676	TBC9B_MOUSE	TBC1 domain family member 9B	0.756699	0.170379	0.468675	Q5SVR0
Q3TW96	Combo-Control	0.170218	0.093561	1.81933	36	0.0771864	0.197346	NA	0.869737	0	1.11246	Uap1l1	UAP1L_MOUSE	UDP-N-acetylhexosamine pyrophosphorylase-like protein 1 (EC 2.7.7.-)	1.11246	0.170218	0.704773	Q3TW96
Q08481	Combo-Control	0.170158	0.158383	1.07435	34	0.290234	0.469552	NA	0.416667	0	0.537252	Pecam1 Pecam Pecam-1	PECA1_MOUSE	Platelet endothelial cell adhesion molecule (PECAM-1) (CD antigen CD31)	0.537252	0.170158	0.328317	Q08481
Q9WTP6	Combo-Control	0.170131	0.139289	1.22143	36	0.229864	0.40506	NA	0.84375	0	0.638529	Ak2	KAD2_MOUSE	Adenylate kinase 2, mitochondrial (AK 2) (EC 2.7.4.3) (ATP-AMP transphosphorylase 2) (ATP:AMP phosphotransferase) (Adenylate monophosphate kinase)	0.638529	0.170131	0.39248	Q9WTP6
Q9ERR7	Combo-Control	0.169644	0.0846416	2.00427	36	0.0526087	0.154761	NA	0.375	0	1.27894	Selenof Sep15	SEP15_MOUSE	Selenoprotein F (15 kDa selenoprotein)	1.27894	0.169644	0.810339	Q9ERR7
Q62165	Combo-Control	0.169382	0.0901059	1.87981	36	0.0682459	0.18181	NA	0.420833	0	1.16592	Dag1 Dag-1	DAG1_MOUSE	Dystroglycan (Dystrophin-associated glycoprotein 1) [Cleaved into: Alpha-dystroglycan (Alpha-DG); Beta-dystroglycan (Beta-DG)]	1.16592	0.169382	0.740382	Q62165
P50543	Combo-Control	0.168398	0.206236	0.81653	36	0.419568	0.596322	NA	0.74359	0	0.377198	S100a11 S100c	S10AB_MOUSE	Protein S100-A11 (Calgizzarin) (Endothelial monocyte-activating polypeptide) (EMAP) (Protein S100-C) (S100 calcium-binding protein A11)	0.377198	0.168398	0.224519	P50543
Q8VEA8	Combo-Control	0.168155	0.236788	0.710151	29	0.483283	0.653826	NA	0.233333	0	0.315799	Rab7b	RAB7B_MOUSE	Ras-related protein Rab-7b	0.315799	0.168155	0.184538	Q8VEA8
Q9D2N9	Combo-Control	0.16771	0.113561	1.47683	36	0.148416	0.30549	NA	0.25	0	0.828519	Vps33a Bf Buff	VP33A_MOUSE	Vacuolar protein sorting-associated protein 33A	0.828519	0.16771	0.515004	Q9D2N9
Q8CIF6	Combo-Control	0.167535	0.124246	1.34841	36	0.185948	0.350581	NA	0.428571	0	0.730607	Sidt2	SIDT2_MOUSE	SID1 transmembrane family member 2	0.730607	0.167535	0.455212	Q8CIF6
Q8VEB4	Combo-Control	0.1674	0.121123	1.38207	36	0.175466	0.340138	NA	0.51	0	0.755806	Pla2g15 Lypla3	PAG15_MOUSE	Group XV phospholipase A2 (EC 2.3.1.-) (1-O-acylceramide synthase) (ACS) (LCAT-like lysophospholipase) (LLPL) (Lysophospholipase 3) (Lysosomal phospholipase A2) (LPLA2)	0.755806	0.1674	0.468345	Q8VEB4
P97372	Combo-Control	0.167158	0.111037	1.50543	36	0.140938	0.294634	NA	0.878659	0	0.850971	Psme2 Pa28b1	PSME2_MOUSE	Proteasome activator complex subunit 2 (11S regulator complex subunit beta) (REG-beta) (Activator of multicatalytic protease subunit 2) (Proteasome activator 28 subunit beta) (PA28b) (PA28beta)	0.850971	0.167158	0.530717	P97372
P27046	Combo-Control	0.167015	0.0824721	2.02511	36	0.05032	0.149959	NA	0.820909	0	1.29826	Man2a1 Mana2	MA2A1_MOUSE	Alpha-mannosidase 2 (EC 3.2.1.114) (Golgi alpha-mannosidase II) (AMan II) (Man II) (Mannosidase alpha class 2A member 1) (Mannosyl-oligosaccharide 1,3-1,6-alpha-mannosidase)	1.29826	0.167015	0.824029	P27046
Q9DBS5	Combo-Control	0.166635	0.23935	0.696197	36	0.490776	0.660555	NA	0.55625	0	0.309117	Klc4 Knsl8	KLC4_MOUSE	Kinesin light chain 4 (KLC 4) (Kinesin-like protein 8)	0.309117	0.166635	0.180091	Q9DBS5
P62073	Combo-Control	0.166288	0.0828153	2.00794	36	0.0521997	0.15387	NA	0.233333	0	1.28233	Timm10 Tim10	TIM10_MOUSE	Mitochondrial import inner membrane translocase subunit Tim10	1.28233	0.166288	0.812845	P62073
Q9Z1B3	Combo-Control	0.166004	0.143799	1.15441	33	0.256623	0.432721	NA	0.5625	0	0.590705	Plcb1 Plcb	PLCB1_MOUSE	1-phosphatidylinositol 4,5-bisphosphate phosphodiesterase beta-1 (EC 3.1.4.11) (PLC-154) (Phosphoinositide phospholipase C-beta-1) (Phospholipase C-beta-1) (PLC-beta-1)	0.590705	0.166004	0.363792	Q9Z1B3
Q9D394	Combo-Control	0.1658	0.262271	0.632171	30	0.532064	0.695173	NA	0.533333	0	0.274036	Rufy3 D5Bwg0860e Ripx	RUFY3_MOUSE	Protein RUFY3 (Rap2-interacting protein x) (RIPx) (Single axon-regulated protein 1) (Singar1)	0.274036	0.1658	0.157907	Q9D394
Q9QVP9	Combo-Control	0.165276	0.0738489	2.23803	36	0.0314976	0.112792	NA	0.611905	0	1.50172	Ptk2b Fak2 Pyk2 Raftk	FAK2_MOUSE	Protein-tyrosine kinase 2-beta (EC 2.7.10.2) (Calcium-dependent tyrosine kinase) (CADTK) (Calcium-regulated non-receptor proline-rich tyrosine kinase) (Cell adhesion kinase beta) (CAK-beta) (CAKB) (Focal adhesion kinase 2) (FADK 2) (Proline-rich tyrosine kinase 2) (Related adhesion focal tyrosine kinase) (RAFTK)	1.50172	0.165276	0.94772	Q9QVP9
Q6P9R2	Combo-Control	0.165139	0.0566618	2.91446	36	0.00609211	0.0395987	NA	0.502632	0	2.21523	Oxsr1 Osr1	OXSR1_MOUSE	Serine/threonine-protein kinase OSR1 (EC 2.7.11.1) (Oxidative stress-responsive 1 protein)	2.21523	0.165139	1.40232	Q6P9R2
Q99KK2	Combo-Control	0.165024	0.093543	1.76416	36	0.0861908	0.212275	NA	0.3875	0	1.06454	Cmas	NEUA_MOUSE	N-acylneuraminate cytidylyltransferase (EC 2.7.7.43) (CMP-N-acetylneuraminic acid synthase) (CMP-NeuNAc synthase)	1.06454	0.165024	0.673102	Q99KK2
Q99J47	Combo-Control	0.164506	0.161225	1.02035	36	0.31437	0.494026	NA	0.366667	0	0.502559	Dhrs7b Sdr32c1	DRS7B_MOUSE	Dehydrogenase/reductase SDR family member 7B (EC 1.1.-.-) (Short-chain dehydrogenase/reductase family 32C member 1)	0.502559	0.164506	0.30625	Q99J47
Q9CQ89	Combo-Control	0.164344	0.281096	0.584652	35	0.562532	0.718726	NA	0.475	0	0.249853	Cuta	CUTA_MOUSE	Protein CutA (Brain acetylcholinesterase putative membrane anchor)	0.249853	0.164344	0.143437	Q9CQ89
P11438	Combo-Control	0.164164	0.0778057	2.10992	36	0.0418824	0.133618	NA	0.104545	0	1.37797	Lamp1 Lamp-1	LAMP1_MOUSE	Lysosome-associated membrane glycoprotein 1 (LAMP-1) (Lysosome-associated membrane protein 1) (120 kDa lysosomal membrane glycoprotein) (CD107 antigen-like family member A) (LGP-120) (Lysosomal membrane glycoprotein A) (LGP-A) (P2B) (CD antigen CD107a)	1.37797	0.164164	0.874137	P11438
Q8CHP5	Combo-Control	0.163972	0.18009	0.910499	29	0.370066	0.55066	NA	0.45	0	0.431721	Pym1 Pym Wibg	PYM1_MOUSE	Partner of Y14 and mago (PYM homolog 1 exon junction complex-associated factor) (Protein wibg homolog)	0.431721	0.163972	0.259116	Q8CHP5
Q8CHT0	Combo-Control	0.163807	0.108312	1.51237	36	0.13917	0.291928	NA	0.015	0	0.856454	Aldh4a1	AL4A1_MOUSE	Delta-1-pyrroline-5-carboxylate dehydrogenase, mitochondrial (P5C dehydrogenase) (EC 1.2.1.88) (Aldehyde dehydrogenase family 4 member A1) (L-glutamate gamma-semialdehyde dehydrogenase)	0.856454	0.163807	0.534725	Q8CHT0
Q9Z100	Combo-Control	0.163782	0.223611	0.732443	33	0.469069	0.642036	NA	0.358333	0	0.328763	Cpxm1 Cpx1 Cpxm	CPXM1_MOUSE	Probable carboxypeptidase X1 (EC 3.4.17.-) (Metallocarboxypeptidase CPX-1)	0.328763	0.163782	0.19244	Q9Z100
P62075	Combo-Control	0.163145	0.0939525	1.73647	36	0.0910331	0.220327	NA	0.455882	0	1.0408	Timm13 Tim13a Timm13a	TIM13_MOUSE	Mitochondrial import inner membrane translocase subunit Tim13	1.0408	0.163145	0.656933	P62075
Q99K70	Combo-Control	0.162544	0.113344	1.43407	36	0.160181	0.319773	NA	0.2	0	0.795389	Rragc	RRAGC_MOUSE	Ras-related GTP-binding protein C (Rag C) (RagC) (GTPase-interacting protein 2) (TIB929)	0.795389	0.162544	0.495159	Q99K70
Q8BZA9	Combo-Control	0.162509	0.251887	0.645168	24	0.524938	0.688605	NA	0.25	0	0.279892	Tigar	TIGAR_MOUSE	Fructose-2,6-bisphosphatase TIGAR (EC 3.1.3.46) (TP53-induced glycolysis and apoptosis regulator) (TP53-induced glycolysis regulatory phosphatase)	0.279892	0.162509	0.16203	Q8BZA9
Q3TC33	Combo-Control	0.162394	0.162232	1.001	32	0.324336	0.505479	NA	0.45	0	0.489005	Ccdc127	CC127_MOUSE	Coiled-coil domain-containing protein 127	0.489005	0.162394	0.296297	Q3TC33
P01664	Combo-Control	0.161902	0.3667	0.441512	30	0.662009	0.792075	NA	0.15	0	0.179136	NA	NA	NA	0.179136	0.161902	0.101233	P01664;P01665;P01666;P01668
Q9DC04	Combo-Control	0.161714	0.111149	1.45492	35	0.154601	0.313682	NA	0.05	0	0.810787	Rgs3	RGS3_MOUSE	Regulator of G-protein signaling 3 (RGS3) (C2PA)	0.810787	0.161714	0.503511	Q9DC04
P57080	Combo-Control	0.161681	0.123948	1.30443	33	0.20111	0.370166	NA	0.483333	0	0.696566	Usp25	UBP25_MOUSE	Ubiquitin carboxyl-terminal hydrolase 25 (EC 3.4.19.12) (Deubiquitinating enzyme 25) (Ubiquitin thioesterase 25) (Ubiquitin-specific-processing protease 25) (mUSP25)	0.696566	0.161681	0.431604	P57080
Q9DCM0	Combo-Control	0.16165	0.0851304	1.89885	36	0.0656216	0.177415	NA	0.767073	0	1.18295	Ethe1 Hsco	ETHE1_MOUSE	Persulfide dioxygenase ETHE1, mitochondrial (EC 1.13.11.18) (Ethylmalonic encephalopathy protein 1 homolog) (Hepatoma subtracted clone one protein) (Sulfur dioxygenase ETHE1)	1.18295	0.16165	0.751009	Q9DCM0
O55126	Combo-Control	0.161446	0.132348	1.21986	36	0.230449	0.40538	NA	0.38125	0	0.637425	Nipsnap2 Gbas	NIPS2_MOUSE	Protein NipSnap homolog 2 (NipSnap2) (Glioblastoma-amplified sequence)	0.637425	0.161446	0.392138	O55126
P17183	Combo-Control	0.161339	0.226139	0.71345	36	0.480167	0.65158	NA	0.125	0	0.318608	Eno2 Eno-2	ENOG_MOUSE	Gamma-enolase (EC 4.2.1.11) (2-phospho-D-glycerate hydro-lyase) (Enolase 2) (Neural enolase) (Neuron-specific enolase) (NSE)	0.318608	0.161339	0.186032	P17183
Q9JI90	Combo-Control	0.161219	0.126582	1.27364	28	0.213263	0.384537	NA	0.2	0	0.671085	Rnf14 Ara54 Triad2	RNF14_MOUSE	E3 ubiquitin-protein ligase RNF14 (EC 2.3.2.31) (Androgen receptor-associated protein 54) (Protein Triad2) (RING finger protein 14)	0.671085	0.161219	0.415061	Q9JI90
P62897	Combo-Control	0.161174	0.157511	1.02326	36	0.313012	0.493142	NA	0.852941	0	0.504439	Cycs	CYC_MOUSE	Cytochrome c, somatic	0.504439	0.161174	0.307028	P62897
Q9QWT9	Combo-Control	0.160665	0.132896	1.20896	11	0.252023	0.427947	NA	0.65	0	0.598559	Kifc1 Kifc4 Kifc5a Kifc5b	KIFC1_MOUSE	Kinesin-like protein KIFC1	0.598559	0.160665	0.36861	Q9QWT9
P07141	Combo-Control	0.160653	0.18545	0.866289	35	0.392232	0.571146	NA	0.26	0	0.406457	Csf1 Csfm	CSF1_MOUSE	Macrophage colony-stimulating factor 1 (CSF-1) (MCSF) [Cleaved into: Processed macrophage colony-stimulating factor 1]	0.406457	0.160653	0.243253	P07141
Q9CYZ6	Combo-Control	0.160175	0.379645	0.421908	13	0.679986	0.806914	NA	0.5	0	0.1675	Rex1bd	REX1B_MOUSE	Required for excision 1-B domain-containing protein	0.1675	0.160175	0.0931729	Q9CYZ6
P10833	Combo-Control	0.160162	0.0975034	1.64263	36	0.109167	0.24856	NA	0	0	0.961908	Rras	RRAS_MOUSE	Ras-related protein R-Ras (p23)	0.961908	0.160162	0.604569	P10833
P35821	Combo-Control	0.159939	0.0979228	1.63332	36	0.111119	0.251684	NA	0.497222	0	0.954212	Ptpn1	PTN1_MOUSE	Tyrosine-protein phosphatase non-receptor type 1 (EC 3.1.3.48) (Protein-tyrosine phosphatase 1B) (PTP-1B) (Protein-tyrosine phosphatase HA2) (PTP-HA2)	0.954212	0.159939	0.599144	P35821
Q8VD65	Combo-Control	0.159411	0.116161	1.37233	36	0.178452	0.343	NA	0.242308	0	0.74848	Pik3r4 Vps15	PI3R4_MOUSE	Phosphoinositide 3-kinase regulatory subunit 4 (PI3-kinase regulatory subunit 4) (EC 2.7.11.1)	0.74848	0.159411	0.464706	Q8VD65
Q9JM14	Combo-Control	0.159171	0.0912895	1.74359	36	0.0897663	0.217869	NA	0.621154	0	1.04689	Nt5c Dnt1	NT5C_MOUSE	5'(3')-deoxyribonucleotidase, cytosolic type (EC 3.1.3.-) (Cytosolic 5',3'-pyrimidine nucleotidase) (Deoxy-5'-nucleotidase 1) (dNT-1)	1.04689	0.159171	0.661804	Q9JM14
Q9D0K2	Combo-Control	0.158733	0.0988688	1.60549	36	0.117124	0.259997	NA	0.821	0	0.931353	Oxct1 Oxct Scot	SCOT1_MOUSE	Succinyl-CoA:3-ketoacid coenzyme A transferase 1, mitochondrial (EC 2.8.3.5) (3-oxoacid CoA-transferase 1) (Somatic-type succinyl-CoA:3-oxoacid CoA-transferase) (SCOT-s)	0.931353	0.158733	0.585032	Q9D0K2
Q921M7	Combo-Control	0.158679	0.101	1.57107	36	0.124914	0.270243	NA	0.833898	0	0.903388	Fam49b	FA49B_MOUSE	Protein FAM49B	0.903388	0.158679	0.568245	Q921M7
P01843	Combo-Control	0.158361	0.196973	0.803975	36	0.426689	0.603087	NA	0.33125	0	0.369889	NA	LAC1_MOUSE	Ig lambda-1 chain C region	0.369889	0.158361	0.21962	P01843
Q9CQM5	Combo-Control	0.158278	0.116823	1.35485	36	0.183907	0.349785	NA	0.6875	0	0.735402	Txndc17 Txnl5	TXD17_MOUSE	Thioredoxin domain-containing protein 17 (14 kDa thioredoxin-related protein) (TRP14) (Protein 42-9-9) (Thioredoxin-like protein 5)	0.735402	0.158278	0.456198	Q9CQM5
Q8BMS9	Combo-Control	0.158197	0.109692	1.4422	36	0.157891	0.317096	NA	0.075	0	0.801644	Rassf2 Kiaa0168	RASF2_MOUSE	Ras association domain-containing protein 2	0.801644	0.158197	0.49881	Q8BMS9
Q3TYS2	Combo-Control	0.157988	0.11686	1.35194	36	0.184827	0.350026	NA	0	0	0.733234	Cybc1 Eros	CYBC1_MOUSE	Cytochrome b-245 chaperone 1 (Essential for reactive oxygen species protein) (Eros)	0.733234	0.157988	0.4559	Q3TYS2
P11352	Combo-Control	0.157978	0.104778	1.50775	36	0.140346	0.293536	NA	0.807692	0	0.852801	Gpx1	GPX1_MOUSE	Glutathione peroxidase 1 (GPx-1) (GSHPx-1) (EC 1.11.1.9) (Cellular glutathione peroxidase) (Selenium-dependent glutathione peroxidase 1)	0.852801	0.157978	0.532338	P11352
Q9JLZ3	Combo-Control	0.15776	0.118253	1.33409	36	0.190552	0.356781	NA	0.4	0	0.719987	Auh	AUHM_MOUSE	Methylglutaconyl-CoA hydratase, mitochondrial (EC 4.2.1.18) (AU-specific RNA-binding enoyl-CoA hydratase) (AU-binding enoyl-CoA hydratase) (muAUH) (Itaconyl-CoA hydratase) (EC 4.2.1.56)	0.719987	0.15776	0.447598	Q9JLZ3
O88983	Combo-Control	0.157646	0.137416	1.14722	36	0.258858	0.435306	NA	0.25	0	0.586939	Stx8	STX8_MOUSE	Syntaxin-8 (Syntaxin-like protein 3I35)	0.586939	0.157646	0.361205	O88983
Q8K330	Combo-Control	0.15745	0.170044	0.925937	25	0.363331	0.543165	NA	0.3	0	0.439697	Ssh3 Ssh3l	SSH3_MOUSE	Protein phosphatase Slingshot homolog 3 (EC 3.1.3.16) (EC 3.1.3.48) (SSH-like protein 3) (SSH-3L) (mSSH-3L)	0.439697	0.15745	0.265069	Q8K330
Q8BHG2	Combo-Control	0.157374	0.121863	1.2914	36	0.204797	0.374097	NA	0.39	0	0.688676	Czib	CZIB_MOUSE	CXXC motif containing zinc binding protein (UPF0587 protein C1orf123 homolog)	0.688676	0.157374	0.427016	Q8BHG2
P16546	Combo-Control	0.156002	0.064582	2.41557	36	0.0209128	0.0865619	NA	0.976856	0	1.67959	Sptan1 Spna2 Spta2	SPTN1_MOUSE	Spectrin alpha chain, non-erythrocytic 1 (Alpha-II spectrin) (Fodrin alpha chain)	1.67959	0.156002	1.06267	P16546
Q921I1	Combo-Control	0.155974	0.224457	0.694892	36	0.491584	0.661232	NA	0.976744	0	0.308402	Tf Trf	TRFE_MOUSE	Serotransferrin (Transferrin) (Beta-1 metal-binding globulin) (Siderophilin)	0.308402	0.155974	0.179646	Q921I1
P0DP26	Combo-Control	0.155755	0.102154	1.52471	36	0.13607	0.288204	NA	0.811321	0	0.866236	NA	NA	NA	0.866236	0.155755	0.540301	P0DP26;P0DP27;P0DP28
Q8VCI5	Combo-Control	0.15564	0.115406	1.34863	35	0.186118	0.350748	NA	0.125	0	0.730212	Pex19 Pxf	PEX19_MOUSE	Peroxisomal biogenesis factor 19 (Peroxin-19) (Peroxisomal farnesylated protein) (PxF)	0.730212	0.15564	0.455004	Q8VCI5
P62311	Combo-Control	0.155306	0.0968767	1.60313	36	0.117645	0.260526	NA	0.0909091	0	0.929427	Lsm3	LSM3_MOUSE	U6 snRNA-associated Sm-like protein LSm3	0.929427	0.155306	0.584149	P62311
O88492	Combo-Control	0.154591	0.289843	0.53336	36	0.597062	0.746456	NA	0.342857	0	0.223981	Plin4 Kiaa1881	PLIN4_MOUSE	Perilipin-4 (Adipocyte protein S3-12)	0.223981	0.154591	0.126996	O88492
P08607	Combo-Control	0.153659	0.195521	0.785897	36	0.437071	0.612972	NA	0.467857	0	0.359448	C4bpa C4bp	C4BPA_MOUSE	C4b-binding protein (C4bp)	0.359448	0.153659	0.21256	P08607
Q9DBD0	Combo-Control	0.152938	0.181266	0.84372	36	0.404398	0.582966	NA	0.732692	0	0.393191	Ica	ICA_MOUSE	Inhibitor of carbonic anhydrase	0.393191	0.152938	0.234357	Q9DBD0
Q99MK8	Combo-Control	0.15253	0.156586	0.974103	36	0.336506	0.518004	NA	0.425	0	0.473007	Grk2 Adrbk1	ARBK1_MOUSE	Beta-adrenergic receptor kinase 1 (Beta-ARK-1) (EC 2.7.11.15) (G-protein-coupled receptor kinase 2)	0.473007	0.15253	0.285667	Q99MK8
P06537	Combo-Control	0.152457	0.21112	0.722133	24	0.477191	0.648907	NA	0.6	0	0.321308	Nr3c1 Grl Grl1	GCR_MOUSE	Glucocorticoid receptor (GR) (Nuclear receptor subfamily 3 group C member 1)	0.321308	0.152457	0.187817	P06537
Q9JIY5	Combo-Control	0.152409	0.0907474	1.67948	36	0.101718	0.237707	NA	0.642857	0	0.992602	Htra2 Omi Prss25	HTRA2_MOUSE	Serine protease HTRA2, mitochondrial (EC 3.4.21.108) (High temperature requirement protein A2) (HtrA2) (Omi stress-regulated endoprotease) (Serine protease 25) (Serine proteinase OMI)	0.992602	0.152409	0.623958	Q9JIY5
Q9ERN0	Combo-Control	0.151908	0.123472	1.2303	36	0.226564	0.401036	NA	0	0	0.644809	Scamp2	SCAM2_MOUSE	Secretory carrier-associated membrane protein 2 (Secretory carrier membrane protein 2)	0.644809	0.151908	0.396817	Q9ERN0
P98086	Combo-Control	0.151832	0.0933146	1.6271	36	0.112439	0.254013	NA	0.384375	0	0.949081	C1qa	C1QA_MOUSE	Complement C1q subcomponent subunit A	0.949081	0.151832	0.595145	P98086
Q9D8B3	Combo-Control	0.15178	0.0970094	1.56459	36	0.126428	0.272801	NA	0.615385	0	0.898156	Chmp4b	CHM4B_MOUSE	Charged multivesicular body protein 4b (Chromatin-modifying protein 4b) (CHMP4b)	0.898156	0.15178	0.564154	Q9D8B3
Q9DCD6	Combo-Control	0.151153	0.117162	1.29013	36	0.205233	0.374578	NA	0.311111	0	0.687753	Gabarap	GBRAP_MOUSE	Gamma-aminobutyric acid receptor-associated protein (GABA(A) receptor-associated protein)	0.687753	0.151153	0.426457	Q9DCD6
O35604	Combo-Control	0.151063	0.0697468	2.16588	36	0.0370219	0.124131	NA	0.115	0	1.43154	Npc1	NPC1_MOUSE	NPC intracellular cholesterol transporter 1 (Niemann-Pick C1 protein)	1.43154	0.151063	0.906121	O35604
P30412	Combo-Control	0.150845	0.182249	0.827689	36	0.4133	0.590895	NA	0.06	0	0.383735	Ppic Cypc	PPIC_MOUSE	Peptidyl-prolyl cis-trans isomerase C (PPIase C) (EC 5.2.1.8) (Cyclophilin C) (Rotamase C)	0.383735	0.150845	0.22849	P30412
Q61235	Combo-Control	0.150795	0.0824741	1.82839	36	0.0757859	0.194695	NA	0.661111	0	1.12041	Sntb2 Snt2b2	SNTB2_MOUSE	Beta-2-syntrophin (59 kDa dystrophin-associated protein A1 basic component 2) (Syntrophin-3) (SNT3) (Syntrophin-like) (SNTL)	1.12041	0.150795	0.710645	Q61235
Q9R1K9	Combo-Control	0.150188	0.0991117	1.51534	35	0.138666	0.291285	NA	0.175	0	0.858031	Cetn2 Calt	CETN2_MOUSE	Centrin-2 (Caltractin isoform 1)	0.858031	0.150188	0.535682	Q9R1K9
P51150	Combo-Control	0.149583	0.0761408	1.96455	36	0.0572211	0.162921	NA	0.863014	0	1.24244	Rab7a Rab7	RAB7A_MOUSE	Ras-related protein Rab-7a	1.24244	0.149583	0.788024	P51150
Q8CAA7	Combo-Control	0.148922	0.13959	1.06685	30	0.294548	0.473853	NA	0.2	0	0.530843	Pgm2l1	PGM2L_MOUSE	Glucose 1,6-bisphosphate synthase (EC 2.7.1.106) (Phosphoglucomutase-2-like 1)	0.530843	0.148922	0.324356	Q8CAA7
Q924D0	Combo-Control	0.148313	0.22012	0.673784	25	0.506631	0.673297	NA	0.25	0	0.295308	Rtn4ip1 Nimp	RT4I1_MOUSE	Reticulon-4-interacting protein 1, mitochondrial (NOGO-interacting mitochondrial protein)	0.295308	0.148313	0.171793	Q924D0
Q9QZQ8	Combo-Control	0.148118	0.0777614	1.90478	36	0.0648222	0.176021	NA	0.906542	0	1.18828	Macroh2a1 H2afy	H2AY_MOUSE	Core histone macro-H2A.1 (Histone macroH2A1) (mH2A1) (H2A.y) (H2A/y)	1.18828	0.148118	0.754435	Q9QZQ8
Q07113	Combo-Control	0.147905	0.0749305	1.9739	36	0.0561054	0.16138	NA	0.851136	0	1.251	Igf2r	MPRI_MOUSE	Cation-independent mannose-6-phosphate receptor (CI Man-6-P receptor) (CI-MPR) (M6PR) (300 kDa mannose 6-phosphate receptor) (MPR 300) (Insulin-like growth factor 2 receptor) (Insulin-like growth factor II receptor) (IGF-II receptor) (M6P/IGF2 receptor) (M6P/IGF2R) (CD antigen CD222)	1.251	0.147905	0.79215	Q07113
P11531	Combo-Control	0.147238	0.433986	0.339268	22	0.737625	0.848478	NA	0.3	0	0.132164	Dmd	DMD_MOUSE	Dystrophin	0.132164	0.147238	0.0713594	P11531
P20918	Combo-Control	0.146448	0.156412	0.936296	36	0.35536	0.535554	NA	0.952885	0	0.449332	Plg	PLMN_MOUSE	Plasminogen (EC 3.4.21.7) [Cleaved into: Plasmin heavy chain A; Activation peptide; Angiostatin; Plasmin heavy chain A, short form; Plasmin light chain B]	0.449332	0.146448	0.271197	P20918
P97873	Combo-Control	0.146393	0.169023	0.866113	19	0.397234	0.575697	NA	0.5	0	0.400954	Loxl1 Lox2 Loxl	LOXL1_MOUSE	Lysyl oxidase homolog 1 (EC 1.4.3.-) (Lysyl oxidase 2) (Lysyl oxidase-like protein 1)	0.400954	0.146393	0.239806	P97873
Q9CWS4	Combo-Control	0.146144	0.275757	0.529972	19	0.60227	0.75016	NA	0.6	0	0.220209	Ints11 Cpsf3l	INT11_MOUSE	Integrator complex subunit 11 (Int11) (EC 3.1.27.-) (Cleavage and polyadenylation-specific factor 3-like protein) (CPSF3-like protein)	0.220209	0.146144	0.124846	Q9CWS4
Q4KML4	Combo-Control	0.146055	0.128421	1.13731	36	0.262921	0.439475	NA	0.571739	0	0.580175	Abracl	ABRAL_MOUSE	Costars family protein ABRACL (ABRA C-terminal-like protein)	0.580175	0.146055	0.357066	Q4KML4
Q8R151	Combo-Control	0.146037	0.142076	1.02788	36	0.310862	0.490465	NA	0.386364	0	0.507433	Znfx1	ZNFX1_MOUSE	NFX1-type zinc finger-containing protein 1	0.507433	0.146037	0.309392	Q8R151
Q9CR21	Combo-Control	0.145851	0.139196	1.04781	35	0.301908	0.481765	NA	0.175	0	0.520126	Ndufab1	ACPM_MOUSE	Acyl carrier protein, mitochondrial (ACP) (CI-SDAP) (NADH-ubiquinone oxidoreductase 9.6 kDa subunit)	0.520126	0.145851	0.317165	Q9CR21
Q9JII6	Combo-Control	0.145553	0.100678	1.44573	36	0.156903	0.315863	NA	0.89899	0	0.804369	Akr1a1 Akr1a4	AK1A1_MOUSE	Aldo-keto reductase family 1 member A1 (EC 1.1.1.2) (EC 1.1.1.33) (EC 1.1.1.372) (EC 1.1.1.54) (Alcohol dehydrogenase [NADP(+)]) (Aldehyde reductase) (Glucuronate reductase) (EC 1.1.1.19) (Glucuronolactone reductase) (EC 1.1.1.20)	0.804369	0.145553	0.500501	Q9JII6
Q8BGC4	Combo-Control	0.144856	0.084986	1.70447	36	0.0969113	0.229438	NA	0.621429	0	1.01363	Zadh2 Ptgr3	PTGR3_MOUSE	Prostaglandin reductase-3 (PTGR-3) (EC 1.3.1.48) (15-oxoprostaglandin 13-reductase) (Zinc-binding alcohol dehydrogenase domain-containing protein 2)	1.01363	0.144856	0.639335	Q8BGC4
P50516	Combo-Control	0.144847	0.0840925	1.72247	36	0.0935662	0.223884	NA	0.922481	0	1.02888	Atp6v1a Atp6a1 Atp6a2 Atp6v1a1	VATA_MOUSE	V-type proton ATPase catalytic subunit A (V-ATPase subunit A) (EC 7.1.2.2) (V-ATPase 69 kDa subunit) (Vacuolar proton pump subunit alpha)	1.02888	0.144847	0.649977	P50516
Q91WV0	Combo-Control	0.14477	0.0796514	1.81754	36	0.0774648	0.197511	NA	0.025	0	1.1109	Dr1	NC2B_MOUSE	Protein Dr1 (Down-regulator of transcription 1) (Negative cofactor 2-beta) (NC2-beta) (TATA-binding protein-associated phosphoprotein)	1.1109	0.14477	0.70441	Q91WV0
Q61490	Combo-Control	0.144354	0.135202	1.06769	35	0.292969	0.472056	NA	0.05	0	0.533178	Alcam	CD166_MOUSE	CD166 antigen (Activated leukocyte cell adhesion molecule) (BEN) (Protein DM-GRASP) (CD antigen CD166)	0.533178	0.144354	0.326007	Q61490
P21619	Combo-Control	0.144312	0.0646725	2.23142	36	0.0319709	0.113966	NA	0.873418	0	1.49524	Lmnb2	LMNB2_MOUSE	Lamin-B2	1.49524	0.144312	0.943225	P21619
P29533	Combo-Control	0.144161	0.0741374	1.94451	36	0.0596793	0.167829	NA	0.494444	0	1.22418	Vcam1 Vcam-1	VCAM1_MOUSE	Vascular cell adhesion protein 1 (V-CAM 1) (VCAM-1) (CD antigen CD106)	1.22418	0.144161	0.775134	P29533
P30204	Combo-Control	0.144084	0.0993513	1.45025	36	0.155647	0.314482	NA	0.5875	0	0.807858	Msr1 Scvr	MSRE_MOUSE	Macrophage scavenger receptor types I and II (Macrophage acetylated LDL receptor I and II) (Scavenger receptor type A) (SR-A) (CD antigen CD204)	0.807858	0.144084	0.502405	P30204
P29595	Combo-Control	0.143988	0.0954654	1.50828	36	0.140211	0.293395	NA	0.444444	0	0.853219	Nedd8 Nedd-8	NEDD8_MOUSE	NEDD8 (Neddylin) (Neural precursor cell expressed developmentally down-regulated protein 8) (NEDD-8) (Ubiquitin-like protein Nedd8)	0.853219	0.143988	0.532547	P29595
Q3U0B3	Combo-Control	0.143744	0.238031	0.603889	26	0.55115	0.709486	NA	0.25	0	0.25873	Dhrs11 Sdr24c1	DHR11_MOUSE	Dehydrogenase/reductase SDR family member 11 (17-beta-hydroxysteroid dehydrogenase) (3-beta-hydroxysteroid 3-dehydrogenase) (EC 1.1.1.270) (Estradiol 17-beta-dehydrogenase) (EC 1.1.1.62) (Short-chain dehydrogenase/reductase family 24C member 1)	0.25873	0.143744	0.149056	Q3U0B3
Q68FL4	Combo-Control	0.143565	0.134553	1.06698	36	0.293085	0.472056	NA	0.4	0	0.533006	Ahcyl2	SAHH3_MOUSE	Putative adenosylhomocysteinase 3 (AdoHcyase 3) (EC 3.3.1.1) (Long-IRBIT) (S-adenosyl-L-homocysteine hydrolase 3) (S-adenosylhomocysteine hydrolase-like protein 2)	0.533006	0.143565	0.326007	Q68FL4
P81117	Combo-Control	0.143277	0.0829476	1.72732	36	0.0926819	0.222437	NA	0.72973	0	1.033	Nucb2 Nefa	NUCB2_MOUSE	Nucleobindin-2 (DNA-binding protein NEFA) (Prepronesfatin) [Cleaved into: Nesfatin-1]	1.033	0.143277	0.652792	P81117
O08665	Combo-Control	0.142931	2.10429	0.0679234	2	0.952026	0.976733	NA	0.9	0	0.0213511	Sema3a Semad SemD	SEM3A_MOUSE	Semaphorin-3A (Semaphorin III) (Sema III) (Semaphorin-D) (Sema D)	0.0213511	0.142931	0.0102242	O08665
P06909	Combo-Control	0.142719	0.108481	1.31561	36	0.196623	0.363911	NA	0.926866	0	0.706367	Cfh Hf1	CFAH_MOUSE	Complement factor H (Protein beta-1-H)	0.706367	0.142719	0.439005	P06909
Q9ES46	Combo-Control	0.142584	0.224358	0.63552	35	0.529223	0.692552	NA	0.45	0	0.276361	Parvb	PARVB_MOUSE	Beta-parvin	0.276361	0.142584	0.159548	Q9ES46
P06683	Combo-Control	0.141793	0.257947	0.549699	15	0.590617	0.741364	NA	0.758333	0	0.228694	C9	CO9_MOUSE	Complement component C9	0.228694	0.141793	0.129969	P06683
Q9JIA7	Combo-Control	0.141635	0.130219	1.08767	36	0.28397	0.463011	NA	0.08125	0	0.546727	Sphk2	SPHK2_MOUSE	Sphingosine kinase 2 (SK 2) (SPK 2) (EC 2.7.1.91)	0.546727	0.141635	0.334408	Q9JIA7
P59438	Combo-Control	0.14161	0.0763909	1.85376	35	0.0722175	0.189239	NA	0.05	0	1.14136	Hps5 Ru2	HPS5_MOUSE	Hermansky-Pudlak syndrome 5 protein homolog (Ruby-eye protein 2) (Ru2)	1.14136	0.14161	0.72299	P59438
O88746	Combo-Control	0.141583	0.142946	0.990466	36	0.328557	0.509134	NA	0.025	0	0.483389	Tom1	TOM1_MOUSE	Target of Myb protein 1	0.483389	0.141583	0.293167	O88746
P56395	Combo-Control	0.141154	0.0618478	2.28228	36	0.0284851	0.104816	NA	0.777778	0	1.54538	Cyb5a Cyb5	CYB5_MOUSE	Cytochrome b5	1.54538	0.141154	0.979574	P56395
Q9JMH9	Combo-Control	0.140591	0.0947932	1.48313	36	0.146742	0.303262	NA	0.85942	0	0.833445	Myo18a Myspdz	MY18A_MOUSE	Unconventional myosin-XVIIIa (Molecule associated with JAK3 N-terminus) (MAJN) (Myosin containing a PDZ domain) (Surfactant protein receptor SP-R210) (SP-R210)	0.833445	0.140591	0.518181	Q9JMH9
Q9D3D9	Combo-Control	0.140561	0.0661598	2.12457	36	0.0405583	0.131225	NA	0.45	0	1.39192	Atp5f1d Atp5d	ATPD_MOUSE	ATP synthase subunit delta, mitochondrial (ATP synthase F1 subunit delta) (F-ATPase delta subunit)	1.39192	0.140561	0.881983	Q9D3D9
Q64437	Combo-Control	0.139589	0.181472	0.769201	36	0.446792	0.622184	NA	0.05	0	0.349895	Adh7 Adh-3 Adh3	ADH7_MOUSE	All-trans-retinol dehydrogenase [NAD(+)] ADH7 (EC 1.1.1.105) (ADH-C2) (Alcohol dehydrogenase 7) (Alcohol dehydrogenase class 4 mu/sigma chain) (EC 1.1.1.1) (Alcohol dehydrogenase class IV mu/sigma chain) (Gastric alcohol dehydrogenase) (Omega-hydroxydecanoate dehydrogenase ADH7) (EC 1.1.1.66) (Retinol dehydrogenase)	0.349895	0.139589	0.206081	Q64437
Q9Z2U0	Combo-Control	0.139546	0.145981	0.955918	36	0.345489	0.526329	NA	0.886364	0	0.461565	Psma7	PSA7_MOUSE	Proteasome subunit alpha type-7 (EC 3.4.25.1) (Proteasome subunit RC6-1)	0.461565	0.139546	0.278743	Q9Z2U0
P21614	Combo-Control	0.139173	0.205662	0.67671	36	0.502915	0.670546	NA	0.929078	0	0.298505	Gc	VTDB_MOUSE	Vitamin D-binding protein (DBP) (VDB) (Gc-globulin) (Group-specific component)	0.298505	0.139173	0.173571	P21614
P27773	Combo-Control	0.139018	0.0952143	1.46005	36	0.152948	0.311637	NA	0.969136	0	0.815457	Pdia3 Erp Erp60 Grp58	PDIA3_MOUSE	Protein disulfide-isomerase A3 (EC 5.3.4.1) (58 kDa glucose-regulated protein) (58 kDa microsomal protein) (p58) (Disulfide isomerase ER-60) (Endoplasmic reticulum resident protein 57) (ER protein 57) (ERp57) (Endoplasmic reticulum resident protein 60) (ER protein 60) (ERp60)	0.815457	0.139018	0.506351	P27773
P04925	Combo-Control	0.138461	0.165586	0.836188	25	0.410971	0.589701	NA	0.3	0	0.386189	Prnp Prn-p Prp	PRIO_MOUSE	Major prion protein (PrP) (PrP27-30) (PrP33-35C) (CD antigen CD230)	0.386189	0.138461	0.229368	P04925
Q91ZR2	Combo-Control	0.138105	0.102222	1.35104	36	0.185115	0.350073	NA	0.183333	0	0.732559	Snx18 Snag1	SNX18_MOUSE	Sorting nexin-18 (Sorting nexin-associated Golgi protein 1)	0.732559	0.138105	0.455841	Q91ZR2
Q922Q9	Combo-Control	0.138004	0.0842381	1.63826	35	0.110327	0.250545	NA	0.35	0	0.957317	Chid1	CHID1_MOUSE	Chitinase domain-containing protein 1	0.957317	0.138004	0.601115	Q922Q9
Q99KN9	Combo-Control	0.137013	0.10109	1.35536	36	0.183747	0.349785	NA	0.66087	0	0.735779	Clint1 Enth Epn4 Epnr Kiaa0171	EPN4_MOUSE	Clathrin interactor 1 (Enthoprotin) (Epsin-4) (Epsin-related protein) (EpsinR)	0.735779	0.137013	0.456198	Q99KN9
P42227	Combo-Control	0.137012	0.103075	1.32925	36	0.192128	0.358021	NA	0.824545	0	0.716409	Stat3 Aprf	STAT3_MOUSE	Signal transducer and activator of transcription 3 (Acute-phase response factor)	0.716409	0.137012	0.446091	P42227
Q9WV32	Combo-Control	0.136732	0.0729296	1.87485	36	0.0689441	0.183057	NA	0.892473	0	1.1615	Arpc1b	ARC1B_MOUSE	Actin-related protein 2/3 complex subunit 1B (Arp2/3 complex 41 kDa subunit) (p41-ARC)	1.1615	0.136732	0.737414	Q9WV32
O09061	Combo-Control	0.136526	0.132277	1.03213	36	0.308898	0.488305	NA	0.859155	0	0.510186	Psmb1	PSB1_MOUSE	Proteasome subunit beta type-1 (EC 3.4.25.1) (Macropain subunit C5) (Multicatalytic endopeptidase complex subunit C5) (Proteasome component C5) (Proteasome gamma chain)	0.510186	0.136526	0.311309	O09061
A6X935	Combo-Control	0.136301	0.154919	0.879823	36	0.384791	0.565593	NA	0.861905	0	0.414775	Itih4	ITIH4_MOUSE	Inter alpha-trypsin inhibitor, heavy chain 4 (ITI heavy chain H4) (ITI-HC4) (Inter-alpha-inhibitor heavy chain 4)	0.414775	0.136301	0.247496	A6X935
Q91VT4	Combo-Control	0.136166	0.0715154	1.90401	36	0.0649252	0.176191	NA	0.075	0	1.18759	Cbr4	CBR4_MOUSE	Carbonyl reductase family member 4 (EC 1.-.-.-) (3-ketoacyl-[acyl-carrier-protein] reductase beta subunit) (KAR beta subunit) (3-oxoacyl-[acyl-carrier-protein] reductase) (EC 1.1.1.-) (Quinone reductase CBR4)	1.18759	0.136166	0.754017	Q91VT4
Q91Z67	Combo-Control	0.135267	0.0765959	1.76599	35	0.0861206	0.212222	NA	0.593333	0	1.06489	Srgap2 Fbp27 Fnbp2	SRGP2_MOUSE	SLIT-ROBO Rho GTPase-activating protein 2 (srGAP2) (Formin-binding protein 2) (Formin-binding protein 27) (FBP-27)	1.06489	0.135267	0.673209	Q91Z67
O88627	Combo-Control	0.135263	0.14047	0.962936	34	0.342379	0.523454	NA	0.525	0	0.465493	Slc28a2 Cnt2	S28A2_MOUSE	Sodium/nucleoside cotransporter 2 (Concentrative nucleoside transporter 2) (CNT 2) (Na(+)/nucleoside cotransporter 2) (Sodium-coupled nucleoside transporter 2) (Sodium/purine nucleoside cotransporter) (SPNT) (Solute carrier family 28 member 2)	0.465493	0.135263	0.281122	O88627
Q9ET26	Combo-Control	0.135174	0.100872	1.34005	36	0.188626	0.354184	NA	0.05	0	0.724398	Rnf114 Zfp228 Zfp313 Znf228 Znf313	RN114_MOUSE	E3 ubiquitin-protein ligase RNF114 (EC 2.3.2.27) (RING finger protein 114) (RING-type E3 ubiquitin transferase RNF114) (Zinc finger protein 228) (Zinc finger protein 313)	0.724398	0.135174	0.450771	Q9ET26
P14733	Combo-Control	0.134861	0.0549932	2.45232	36	0.0191737	0.0818606	NA	0.947619	0	1.71729	Lmnb1	LMNB1_MOUSE	Lamin-B1	1.71729	0.134861	1.08693	P14733
Q80UP3	Combo-Control	0.13479	0.124949	1.07876	36	0.28787	0.467439	NA	0.425	0	0.540803	Dgkz	DGKZ_MOUSE	Diacylglycerol kinase zeta (DAG kinase zeta) (EC 2.7.1.107) (Diglyceride kinase zeta) (DGK-zeta)	0.540803	0.13479	0.330275	Q80UP3
Q6ZWM4	Combo-Control	0.134712	0.0977961	1.37748	36	0.176867	0.341228	NA	0.411765	0	0.752352	Lsm8	LSM8_MOUSE	U6 snRNA-associated Sm-like protein LSm8	0.752352	0.134712	0.466956	Q6ZWM4
P04627	Combo-Control	0.1346	0.231645	0.581061	35	0.564923	0.72038	NA	0	0	0.248011	Araf A-raf Araf1	ARAF_MOUSE	Serine/threonine-protein kinase A-Raf (EC 2.7.11.1) (Proto-oncogene A-Raf)	0.248011	0.1346	0.142438	P04627
P63254	Combo-Control	0.134547	0.176004	0.764455	36	0.449578	0.623883	NA	0.827586	0	0.347195	Crip1 Crip	CRIP1_MOUSE	Cysteine-rich protein 1 (CRP-1) (Cysteine-rich intestinal protein) (CRIP)	0.347195	0.134547	0.204897	P63254
Q9CQ80	Combo-Control	0.134436	0.0992761	1.35417	36	0.184123	0.349785	NA	0.558824	0	0.734892	Vps25 D11Wsu68e	VPS25_MOUSE	Vacuolar protein-sorting-associated protein 25 (ESCRT-II complex subunit VPS25)	0.734892	0.134436	0.456198	Q9CQ80
Q9Z160	Combo-Control	0.134434	0.223363	0.601865	19	0.554379	0.712163	NA	0.608333	0	0.256194	Cog1 Ldlb	COG1_MOUSE	Conserved oligomeric Golgi complex subunit 1 (COG complex subunit 1) (Component of oligomeric Golgi complex 1) (Low density lipoprotein receptor defect B-complementing protein)	0.256194	0.134434	0.14742	Q9Z160
Q9QUN7	Combo-Control	0.134007	0.23571	0.568525	36	0.573208	0.726465	NA	0	0	0.241688	Tlr2	TLR2_MOUSE	Toll-like receptor 2 (EC 3.2.2.6) (CD antigen CD282)	0.241688	0.134007	0.138785	Q9QUN7
Q9CYA6	Combo-Control	0.133428	0.157014	0.849787	35	0.401219	0.579571	NA	0.075	0	0.396618	Zcchc8	ZCHC8_MOUSE	Zinc finger CCHC domain-containing protein 8 (TRAMP-like complex RNA-binding factor ZCCHC8)	0.396618	0.133428	0.236893	Q9CYA6
O55098	Combo-Control	0.133237	0.0674402	1.97562	36	0.0559015	0.161064	NA	0.467647	0	1.25258	Stk10 Lok	STK10_MOUSE	Serine/threonine-protein kinase 10 (EC 2.7.11.1) (Lymphocyte-oriented kinase)	1.25258	0.133237	0.793	O55098
P53810	Combo-Control	0.1331	0.1264	1.05301	36	0.299355	0.479128	NA	0.746667	0	0.523814	Pitpna Pitpn	PIPNA_MOUSE	Phosphatidylinositol transfer protein alpha isoform (PI-TP-alpha) (PtdIns transfer protein alpha) (PtdInsTP alpha)	0.523814	0.1331	0.319548	P53810
Q99KH8	Combo-Control	0.132882	0.0691624	1.9213	36	0.0626387	0.17299	NA	0.586364	0	1.20316	Stk24 Mst3 Stk3	STK24_MOUSE	Serine/threonine-protein kinase 24 (EC 2.7.11.1) (Mammalian STE20-like protein kinase 3) (MST-3) (STE20-like kinase MST3) [Cleaved into: Serine/threonine-protein kinase 24 35 kDa subunit (Mammalian STE20-like protein kinase 3 N-terminal) (MST3/N); Serine/threonine-protein kinase 24 12 kDa subunit (Mammalian STE20-like protein kinase 3 C-terminal) (MST3/C)]	1.20316	0.132882	0.761978	Q99KH8
P07759	Combo-Control	0.132102	0.23507	0.56197	36	0.577619	0.729712	NA	0.922481	0	0.238359	Serpina3k Mcm2 Spi2	SPA3K_MOUSE	Serine protease inhibitor A3K (Serpin A3K) (Contrapsin) (SPI-2)	0.238359	0.132102	0.136848	P07759
Q80WQ2	Combo-Control	0.131821	0.147861	0.891517	34	0.378918	0.559803	NA	0.488889	0	0.421455	Vac14 D8Wsu151e	VAC14_MOUSE	Protein VAC14 homolog	0.421455	0.131821	0.251964	Q80WQ2
P11589	Combo-Control	0.131773	0.426701	0.308817	36	0.759241	0.863008	NA	0.0375	0	0.11962	Mup2	MUP2_MOUSE	Major urinary protein 2 (MUP 2)	0.11962	0.131773	0.063985	P11589
Q8BLX7	Combo-Control	0.131761	0.214901	0.613126	29	0.544572	0.704511	NA	0.3	0	0.263945	Col16a1	COGA1_MOUSE	Collagen alpha-1(XVI) chain	0.263945	0.131761	0.152112	Q8BLX7
Q8K2Q0	Combo-Control	0.131237	0.164768	0.796492	36	0.430968	0.607119	NA	0	0	0.365555	Commd9	COMD9_MOUSE	COMM domain-containing protein 9	0.365555	0.131237	0.216726	Q8K2Q0
P61957	Combo-Control	0.131097	0.113429	1.15576	36	0.255392	0.431156	NA	0.375	0	0.592793	Sumo2 Smt3b Smt3h2	SUMO2_MOUSE	Small ubiquitin-related modifier 2 (SUMO-2) (SMT3 homolog 2) (Ubiquitin-like protein SMT3B) (Smt3B)	0.592793	0.131097	0.365365	P61957
Q9QYG0	Combo-Control	0.130667	0.411232	0.317744	27	0.753123	0.858509	NA	0.3	0	0.123134	Ndrg2 Kiaa1248 Ndr2	NDRG2_MOUSE	Protein NDRG2 (N-myc downstream-regulated gene 2 protein) (Protein Ndr2)	0.123134	0.130667	0.066255	Q9QYG0
P70335	Combo-Control	0.130651	0.0634959	2.05764	36	0.0469226	0.144196	NA	0.680769	0	1.32862	Rock1	ROCK1_MOUSE	Rho-associated protein kinase 1 (EC 2.7.11.1) (Rho-associated, coiled-coil-containing protein kinase 1) (Rho-associated, coiled-coil-containing protein kinase I) (ROCK-I) (p160 ROCK-1) (p160ROCK)	1.32862	0.130651	0.841046	P70335
Q9JIG7	Combo-Control	0.130554	0.0765785	1.70484	36	0.0968417	0.229398	NA	0.71	0	1.01394	Ccdc22 DXImx40e	CCD22_MOUSE	Coiled-coil domain-containing protein 22	1.01394	0.130554	0.63941	Q9JIG7
Q8C0N2	Combo-Control	0.130305	0.154933	0.841041	34	0.406201	0.584596	NA	0.6825	0	0.391259	Gpat3 Agpat9	GPAT3_MOUSE	Glycerol-3-phosphate acyltransferase 3 (GPAT-3) (EC 2.3.1.15) (1-acyl-sn-glycerol-3-phosphate O-acyltransferase 10) (AGPAT 10) (1-acyl-sn-glycerol-3-phosphate O-acyltransferase 9) (1-AGP acyltransferase 9) (1-AGPAT 9) (EC 2.3.1.51) (Acyl-CoA:glycerol-3-phosphate acyltransferase 3) (mGPAT3) (Lysophosphatidic acid acyltransferase theta) (LPAAT-theta)	0.391259	0.130305	0.233144	Q8C0N2
Q99PT1	Combo-Control	0.129953	0.121212	1.07212	36	0.290802	0.469915	NA	0.896907	0	0.536402	Arhgdia C87222 Gdi1	GDIR1_MOUSE	Rho GDP-dissociation inhibitor 1 (Rho GDI 1) (GDI-1) (Rho-GDI alpha)	0.536402	0.129953	0.32798	Q99PT1
P14211	Combo-Control	0.128781	0.124085	1.03784	36	0.306264	0.486376	NA	0.94918	0	0.513905	Calr	CALR_MOUSE	Calreticulin (CRP55) (Calregulin) (Endoplasmic reticulum resident protein 60) (ERp60) (HACBP)	0.513905	0.128781	0.313028	P14211
Q9QY76	Combo-Control	0.127742	0.0762027	1.67634	36	0.102336	0.238382	NA	0.7	0	0.98997	Vapb	VAPB_MOUSE	Vesicle-associated membrane protein-associated protein B (VAMP-B) (VAMP-associated protein B) (VAP-B) (VAMP-associated protein 33b)	0.98997	0.127742	0.622726	Q9QY76
P97742	Combo-Control	0.127236	0.12124	1.04946	36	0.300962	0.480433	NA	0.818605	0	0.521488	Cpt1a Cpt-1 Cpt1	CPT1A_MOUSE	Carnitine O-palmitoyltransferase 1, liver isoform (CPT1-L) (EC 2.3.1.21) (Carnitine O-palmitoyltransferase I, liver isoform) (CPT I) (CPTI-L) (Carnitine palmitoyltransferase 1A)	0.521488	0.127236	0.318367	P97742
Q9JHI5	Combo-Control	0.127205	0.108773	1.16945	36	0.249908	0.426528	NA	0.6875	0	0.60222	Ivd	IVD_MOUSE	Isovaleryl-CoA dehydrogenase, mitochondrial (IVD) (EC 1.3.8.4)	0.60222	0.127205	0.370052	Q9JHI5
P57759	Combo-Control	0.126503	0.117671	1.07505	36	0.289503	0.468863	NA	0.803922	0	0.538347	Erp29	ERP29_MOUSE	Endoplasmic reticulum resident protein 29 (ERp29)	0.538347	0.126503	0.328954	P57759
Q62261	Combo-Control	0.126049	0.0529359	2.38116	36	0.0226694	0.0912237	NA	0.963603	0	1.64456	Sptbn1 Elf Spnb-2 Spnb2 Sptb2	SPTB2_MOUSE	Spectrin beta chain, non-erythrocytic 1 (Beta-II spectrin) (Embryonic liver fodrin) (Fodrin beta chain)	1.64456	0.126049	1.03989	Q62261
Q9CR86	Combo-Control	0.125788	0.07555	1.66496	36	0.104601	0.24132	NA	0.452778	0	0.980464	Carhsp1	CHSP1_MOUSE	Calcium-regulated heat stable protein 1 (Calcium-regulated heat-stable protein of 24 kDa) (CRHSP-24)	0.980464	0.125788	0.617406	Q9CR86
Q9QUM9	Combo-Control	0.125588	0.126833	0.990186	36	0.328692	0.509162	NA	0.888889	0	0.483211	Psma6	PSA6_MOUSE	Proteasome subunit alpha type-6 (EC 3.4.25.1) (Macropain iota chain) (Multicatalytic endopeptidase complex iota chain) (Proteasome iota chain)	0.483211	0.125588	0.293144	Q9QUM9
P28474	Combo-Control	0.125564	0.112697	1.11417	36	0.272588	0.451403	NA	0.796939	0	0.564493	Adh5 Adh-2 Adh2	ADHX_MOUSE	Alcohol dehydrogenase class-3 (EC 1.1.1.1) (Alcohol dehydrogenase 2) (Alcohol dehydrogenase 5) (Alcohol dehydrogenase B2) (ADH-B2) (Alcohol dehydrogenase class-III) (Glutathione-dependent formaldehyde dehydrogenase) (FALDH) (FDH) (GSH-FDH) (EC 1.1.1.-) (S-(hydroxymethyl)glutathione dehydrogenase) (EC 1.1.1.284)	0.564493	0.125564	0.345436	P28474
Q7TN29	Combo-Control	0.125467	0.120391	1.04216	36	0.304285	0.484136	NA	0.4	0	0.516719	Smap2 Smap1l	SMAP2_MOUSE	Stromal membrane-associated protein 2 (Stromal membrane-associated protein 1-like)	0.516719	0.125467	0.315033	Q7TN29
Q3TGF2	Combo-Control	0.125287	0.115907	1.08092	36	0.28692	0.466246	NA	0.5075	0	0.542239	Fam107b	F107B_MOUSE	Protein FAM107B	0.542239	0.125287	0.331385	Q3TGF2
Q99L20	Combo-Control	0.125034	0.128775	0.970951	36	0.338052	0.519582	NA	0.57	0	0.471017	Gstt3	GSTT3_MOUSE	Glutathione S-transferase theta-3 (EC 2.5.1.18)	0.471017	0.125034	0.284346	Q99L20
P61028	Combo-Control	0.124396	0.0564335	2.2043	36	0.033981	0.118065	NA	0.375	0	1.46876	Rab8b	RAB8B_MOUSE	Ras-related protein Rab-8B	1.46876	0.124396	0.927879	P61028
Q8BUE4	Combo-Control	0.124217	0.164405	0.755557	36	0.45483	0.62854	NA	0.691304	0	0.342151	Aifm2 Amid	FSP1_MOUSE	Ferroptosis suppressor protein 1 (FSP1) (EC 1.6.5.-) (Apoptosis-inducing factor homologous mitochondrion-associated inducer of death) (AMID) (p53-responsive gene 3 protein)	0.342151	0.124217	0.201667	Q8BUE4
Q9JLQ0	Combo-Control	0.124146	0.146555	0.847098	36	0.402537	0.581056	NA	0.810204	0	0.395194	Cd2ap Mets1	CD2AP_MOUSE	CD2-associated protein (Mesenchyme-to-epithelium transition protein with SH3 domains 1) (METS-1)	0.395194	0.124146	0.235782	Q9JLQ0
Q64520	Combo-Control	0.124107	0.109442	1.134	36	0.264289	0.441193	NA	0.365	0	0.57792	Guk1 Gmk	KGUA_MOUSE	Guanylate kinase (EC 2.7.4.8) (GMP kinase) (Guanylate kinase 1)	0.57792	0.124107	0.355371	Q64520
Q8R409	Combo-Control	0.123484	0.132015	0.935378	35	0.356003	0.536024	NA	0.25	0	0.448546	Hexim1 Clp1	HEXI1_MOUSE	Protein HEXIM1 (Cardiac lineage protein 1)	0.448546	0.123484	0.270816	Q8R409
Q8VC03	Combo-Control	0.123267	0.108918	1.13174	34	0.265662	0.442974	NA	0.25	0	0.57567	Eml3	EMAL3_MOUSE	Echinoderm microtubule-associated protein-like 3 (EMAP-3)	0.57567	0.123267	0.353622	Q8VC03
Q9Z2L6	Combo-Control	0.123163	0.134106	0.918403	36	0.364521	0.544461	NA	0.138889	0	0.438278	Minpp1 Mipp MNCb-1572	MINP1_MOUSE	Multiple inositol polyphosphate phosphatase 1 (EC 3.1.3.62) (2,3-bisphosphoglycerate 3-phosphatase) (2,3-BPG phosphatase) (EC 3.1.3.80) (Inositol (1,3,4,5)-tetrakisphosphate 3-phosphatase) (Ins(1,3,4,5)P(4) 3-phosphatase)	0.438278	0.123163	0.264033	Q9Z2L6
Q9WUM4	Combo-Control	0.122822	0.0531718	2.3099	36	0.0267389	0.10052	NA	0.859155	0	1.57286	Coro1c	COR1C_MOUSE	Coronin-1C (Coronin-3)	1.57286	0.122822	0.997749	Q9WUM4
P56382	Combo-Control	0.122616	0.0706774	1.73487	36	0.0913187	0.220526	NA	0	0	1.03944	Atp5f1e Atp5e	ATP5E_MOUSE	ATP synthase subunit epsilon, mitochondrial (ATPase subunit epsilon) (ATP synthase F1 subunit epsilon)	1.03944	0.122616	0.65654	P56382
P00920	Combo-Control	0.122206	0.212155	0.576022	36	0.568184	0.723052	NA	0.555	0	0.245511	Ca2 Car2	CAH2_MOUSE	Carbonic anhydrase 2 (EC 4.2.1.1) (Carbonate dehydratase II) (Carbonic anhydrase II) (CA-II)	0.245511	0.122206	0.14083	P00920
P28667	Combo-Control	0.122206	0.149594	0.816919	36	0.419348	0.596205	NA	0.2125	0	0.377425	Marcksl1 Mlp Mrp	MRP_MOUSE	MARCKS-related protein (Brain protein F52) (MARCKS-like protein 1) (Macrophage myristoylated alanine-rich C kinase substrate) (Mac-MARCKS) (MacMARCKS)	0.377425	0.122206	0.224604	P28667
Q9CQ45	Combo-Control	0.121859	0.0968338	1.25844	36	0.216334	0.38767	NA	0.131818	0	0.664874	Nenf Spuf	NENF_MOUSE	Neudesin (Neuron-derived neurotrophic factor) (Secreted protein of unknown function) (SPUF protein)	0.664874	0.121859	0.411538	Q9CQ45
P85094	Combo-Control	0.12182	0.103761	1.17405	36	0.248085	0.423922	NA	0.426923	0	0.605399	Isoc2a Isoc2	ISC2A_MOUSE	Isochorismatase domain-containing protein 2A	0.605399	0.12182	0.372714	P85094
P62500	Combo-Control	0.121427	0.124274	0.977093	36	0.335044	0.517376	NA	0.0833333	0	0.474898	Tsc22d1 Kiaa1994 Tgfb1i4 Tilz1b Tsc22	T22D1_MOUSE	TSC22 domain family protein 1 (Regulatory protein TSC-22) (TGFB-stimulated clone 22 homolog) (TSC22-related inducible leucine zipper 1b) (Transforming growth factor beta-1-induced transcript 4 protein)	0.474898	0.121427	0.286194	P62500
Q9CXI5	Combo-Control	0.120965	0.109598	1.10372	36	0.277037	0.455861	NA	0.7525	0	0.557463	Manf Armet	MANF_MOUSE	Mesencephalic astrocyte-derived neurotrophic factor (Arginine-rich protein) (Protein ARMET)	0.557463	0.120965	0.341168	Q9CXI5
P15327	Combo-Control	0.120835	0.206347	0.585592	36	0.561803	0.718726	NA	0.238889	0	0.250416	Bpgm	PMGE_MOUSE	Bisphosphoglycerate mutase (BPGM) (EC 5.4.2.4) (2,3-bisphosphoglycerate mutase, erythrocyte) (2,3-bisphosphoglycerate synthase) (EC 5.4.2.11) (BPG-dependent PGAM)	0.250416	0.120835	0.143437	P15327
P47941	Combo-Control	0.120553	0.0902557	1.33569	36	0.190036	0.356138	NA	0.770588	0	0.721165	Crkl Crkol	CRKL_MOUSE	Crk-like protein	0.721165	0.120553	0.448382	P47941
P70175	Combo-Control	0.120372	0.200698	0.599768	26	0.553852	0.711908	NA	0.25	0	0.256606	Dlg3 Dlgh3	DLG3_MOUSE	Disks large homolog 3 (Synapse-associated protein 102) (SAP-102) (SAP102)	0.256606	0.120372	0.147576	P70175
Q9ER38	Combo-Control	0.120211	0.146028	0.823202	36	0.415813	0.592927	NA	0.0333333	0	0.381102	Tor3a Adir	TOR3A_MOUSE	Torsin-3A (ATP-dependent interferon-responsive protein) (Torsin family 3 member A)	0.381102	0.120211	0.226999	Q9ER38
Q9QUM0	Combo-Control	0.120195	0.34568	0.347707	18	0.732093	0.844513	NA	0.4	0	0.135434	Itga2b	ITA2B_MOUSE	Integrin alpha-IIb (GPalpha IIb) (GPIIb) (Platelet membrane glycoprotein IIb) (CD antigen CD41) [Cleaved into: Integrin alpha-IIb heavy chain; Integrin alpha-IIb light chain]	0.135434	0.120195	0.0733935	Q9QUM0
Q8BGT5	Combo-Control	0.120184	0.199921	0.601159	36	0.551501	0.709717	NA	0.6	0	0.258454	Gpt2 Aat2	ALAT2_MOUSE	Alanine aminotransferase 2 (ALT2) (EC 2.6.1.2) (Glutamate pyruvate transaminase 2) (GPT 2) (Glutamic--alanine transaminase 2) (Glutamic--pyruvic transaminase 2)	0.258454	0.120184	0.148915	Q8BGT5
P42125	Combo-Control	0.120102	0.100693	1.19276	36	0.240767	0.417236	NA	0.638889	0	0.618403	Eci1 Dci	ECI1_MOUSE	Enoyl-CoA delta isomerase 1, mitochondrial (EC 5.3.3.8) (3,2-trans-enoyl-CoA isomerase) (Delta(3),Delta(2)-enoyl-CoA isomerase) (D3,D2-enoyl-CoA isomerase) (Dodecenoyl-CoA isomerase)	0.618403	0.120102	0.379618	P42125
Q61129	Combo-Control	0.120021	0.211594	0.567221	36	0.574085	0.727151	NA	0.698485	0	0.241024	Cfi If	CFAI_MOUSE	Complement factor I (EC 3.4.21.45) (C3B/C4B inactivator) [Cleaved into: Complement factor I heavy chain; Complement factor I light chain]	0.241024	0.120021	0.138375	Q61129
Q9D855	Combo-Control	0.119979	0.216129	0.555125	36	0.582243	0.733845	NA	0.718333	0	0.234896	Uqcrb	QCR7_MOUSE	Cytochrome b-c1 complex subunit 7 (Complex III subunit 7) (Complex III subunit VII) (Ubiquinol-cytochrome c reductase complex 14 kDa protein)	0.234896	0.119979	0.134395	Q9D855
P35385	Combo-Control	0.119859	0.417334	0.287201	19	0.777067	0.872969	NA	0.375	0	0.109542	Hspb7 Cvhsp Hsp25-2	HSPB7_MOUSE	Heat shock protein beta-7 (HspB7) (Cardiovascular heat shock protein) (cvHsp) (Heat shock protein 25 kDa 2) (Protein p19/6.8)	0.109542	0.119859	0.0590012	P35385
Q99L04	Combo-Control	0.119526	0.107908	1.10766	36	0.275354	0.454596	NA	0.646429	0	0.560108	Dhrs1 D14ertd484e	DHRS1_MOUSE	Dehydrogenase/reductase SDR family member 1 (EC 1.1.-.-)	0.560108	0.119526	0.342374	Q99L04
P97465	Combo-Control	0.119449	0.11448	1.04341	35	0.303913	0.483987	NA	0	0	0.517251	Dok1 Dok	DOK1_MOUSE	Docking protein 1 (Downstream of tyrosine kinase 1) (p62(dok))	0.517251	0.119449	0.315166	P97465
P15066	Combo-Control	0.119351	0.135091	0.88349	33	0.383363	0.563685	NA	0.275	0	0.41639	Jund Jun-d Jund1	JUND_MOUSE	Transcription factor jun-D	0.41639	0.119351	0.248963	P15066
Q61033	Combo-Control	0.119186	0.0978118	1.21853	36	0.230949	0.405876	NA	0.896907	0	0.636484	Tmpo Lap2	LAP2A_MOUSE	Lamina-associated polypeptide 2, isoforms alpha/zeta (Thymopoietin isoforms alpha/zeta) (TP alpha/zeta)	0.636484	0.119186	0.391607	Q61033
P26040	Combo-Control	0.119113	0.126214	0.943742	36	0.351593	0.532107	NA	0.897468	0	0.45396	Ezr Vil2	EZRI_MOUSE	Ezrin (Cytovillin) (Villin-2) (p81)	0.45396	0.119113	0.274001	P26040
Q8BPB5	Combo-Control	0.119059	0.136944	0.869395	36	0.390391	0.570349	NA	0.438889	0	0.4085	Efemp1 Fbln3	FBLN3_MOUSE	EGF-containing fibulin-like extracellular matrix protein 1 (Fibulin-3) (FIBL-3)	0.4085	0.119059	0.243859	Q8BPB5
Q9R1P0	Combo-Control	0.118651	0.136329	0.870323	36	0.38989	0.56981	NA	0.857031	0	0.409057	Psma4	PSA4_MOUSE	Proteasome subunit alpha type-4 (EC 3.4.25.1) (Macropain subunit C9) (Multicatalytic endopeptidase complex subunit C9) (Proteasome component C9) (Proteasome subunit L)	0.409057	0.118651	0.24427	Q9R1P0
Q5BLK4	Combo-Control	0.118508	0.106666	1.11102	34	0.274353	0.453461	NA	0.613333	0	0.56169	Tut7 Kiaa1711 Zcchc6	TUT7_MOUSE	Terminal uridylyltransferase 7 (TUTase 7) (EC 2.7.7.52) (Zinc finger CCHC domain-containing protein 6)	0.56169	0.118508	0.34346	Q5BLK4
P62965	Combo-Control	0.118133	0.20479	0.576849	33	0.567956	0.722974	NA	0.525	0	0.245685	Crabp1	RABP1_MOUSE	Cellular retinoic acid-binding protein 1 (Cellular retinoic acid-binding protein I) (CRABP-I)	0.245685	0.118133	0.140877	P62965
O08736	Combo-Control	0.118129	0.155295	0.760676	36	0.451805	0.625953	NA	0.383333	0	0.345049	Casp12	CASPC_MOUSE	Caspase-12 (CASP-12) (EC 3.4.22.-)	0.345049	0.118129	0.203459	O08736
P70399	Combo-Control	0.117853	0.118287	0.996327	36	0.325741	0.506942	NA	0.336364	0	0.487127	Tp53bp1 Trp53bp1	TP53B_MOUSE	TP53-binding protein 1 (53BP1) (p53-binding protein 1) (p53BP1)	0.487127	0.117853	0.295042	P70399
Q8VCW8	Combo-Control	0.117631	0.120745	0.974208	36	0.336454	0.518004	NA	0.752564	0	0.473074	Acsf2	ACSF2_MOUSE	Medium-chain acyl-CoA ligase ACSF2, mitochondrial (EC 6.2.1.2)	0.473074	0.117631	0.285667	Q8VCW8
Q9DAS9	Combo-Control	0.117622	0.0821668	1.43151	36	0.160909	0.320932	NA	0.159091	0	0.793418	Gng12	GBG12_MOUSE	Guanine nucleotide-binding protein G(I)/G(S)/G(O) subunit gamma-12	0.793418	0.117622	0.493587	Q9DAS9
O70435	Combo-Control	0.117356	0.120214	0.976228	36	0.335466	0.51744	NA	0.848485	0	0.474351	Psma3	PSA3_MOUSE	Proteasome subunit alpha type-3 (EC 3.4.25.1) (Macropain subunit C8) (Multicatalytic endopeptidase complex subunit C8) (Proteasome component C8) (Proteasome subunit K)	0.474351	0.117356	0.28614	O70435
Q9CVB6	Combo-Control	0.116866	0.0742273	1.57444	36	0.124135	0.269275	NA	0.902913	0	0.906104	Arpc2	ARPC2_MOUSE	Actin-related protein 2/3 complex subunit 2 (Arp2/3 complex 34 kDa subunit) (p34-ARC)	0.906104	0.116866	0.569805	Q9CVB6
Q99KY4	Combo-Control	0.116832	0.171935	0.679509	35	0.501285	0.669717	NA	0.505	0	0.299915	Gak	GAK_MOUSE	Cyclin-G-associated kinase (EC 2.7.11.1)	0.299915	0.116832	0.174109	Q99KY4
P42230	Combo-Control	0.116772	0.0801543	1.45684	36	0.153829	0.312658	NA	0.175	0	0.812961	Stat5a Mgf Mpf	STA5A_MOUSE	Signal transducer and activator of transcription 5A (Mammary gland factor)	0.812961	0.116772	0.504931	P42230
P51174	Combo-Control	0.116717	0.0974128	1.19817	36	0.238679	0.415036	NA	0.885185	0	0.622185	Acadl	ACADL_MOUSE	Long-chain specific acyl-CoA dehydrogenase, mitochondrial (LCAD) (EC 1.3.8.8)	0.622185	0.116717	0.381914	P51174
Q9DCL8	Combo-Control	0.115967	0.125111	0.926914	36	0.360144	0.540154	NA	0.383333	0	0.443524	Ppp1r2	IPP2_MOUSE	Protein phosphatase inhibitor 2 (IPP-2)	0.443524	0.115967	0.267482	Q9DCL8
Q6ZQM8	Combo-Control	0.115732	0.125109	0.925049	36	0.3611	0.54084	NA	0.708824	0	0.442373	Ugt1a7c Ugt1a10	UD17C_MOUSE	UDP-glucuronosyltransferase 1-7C (UDPGT 1-7C) (UGT1*7C) (UGT1-07C) (UGT1.7C) (EC 2.4.1.17) (UDP-glucuronosyltransferase 1A7C) (UGT1A10)	0.442373	0.115732	0.266931	Q6ZQM8
Q3UHX0	Combo-Control	0.11527	0.184944	0.623272	35	0.537147	0.698709	NA	0.05	0	0.269907	Nol8	NOL8_MOUSE	Nucleolar protein 8	0.269907	0.11527	0.155704	Q3UHX0
Q9JHW2	Combo-Control	0.115207	0.139683	0.824774	36	0.414931	0.592608	NA	0.513889	0	0.382024	Nit2 D16Ertd502e	NIT2_MOUSE	Omega-amidase NIT2 (EC 3.5.1.3) (Nitrilase homolog 2)	0.382024	0.115207	0.227233	Q9JHW2
Q8R311	Combo-Control	0.11512	0.11531	0.998351	36	0.324773	0.505957	NA	0.266667	0	0.48842	NA	NA	NA	0.48842	0.11512	0.295886	Q8R311;Q91ZV0
Q9WUN2	Combo-Control	0.114668	0.28033	0.409048	36	0.684928	0.809901	NA	0.504167	0	0.164355	Tbk1	TBK1_MOUSE	Serine/threonine-protein kinase TBK1 (EC 2.7.11.1) (T2K) (TANK-binding kinase 1)	0.164355	0.114668	0.091568	Q9WUN2
P0DOV2	Combo-Control	0.114499	0.0831287	1.37737	36	0.176901	0.341228	NA	0.911504	0	0.75227	Ifi204	IFI4_MOUSE	Interferon-activable protein 204 (Ifi-204) (Interferon-inducible protein p204)	0.75227	0.114499	0.466956	P0DOV2
Q8BUM3	Combo-Control	0.114467	0.394649	0.290046	6	0.781544	0.876185	NA	0.85	0	0.107047	Ptpn7	PTN7_MOUSE	Tyrosine-protein phosphatase non-receptor type 7 (EC 3.1.3.48) (Hematopoietic protein-tyrosine phosphatase) (HEPTP)	0.107047	0.114467	0.0574043	Q8BUM3
P24452	Combo-Control	0.113326	0.136028	0.83311	36	0.410276	0.588899	NA	0.880952	0	0.386924	Capg Mbh1	CAPG_MOUSE	Macrophage-capping protein (Actin regulatory protein CAP-G) (Actin-capping protein GCAP39) (Myc basic motif homolog 1)	0.386924	0.113326	0.22996	P24452
O08808	Combo-Control	0.113221	0.0781714	1.44837	36	0.156168	0.314801	NA	0.896512	0	0.806408	Diaph1 Diap1	DIAP1_MOUSE	Protein diaphanous homolog 1 (Diaphanous-related formin-1) (DRF1) (p140mDIA) (mDIA1)	0.806408	0.113221	0.501964	O08808
Q505F5	Combo-Control	0.113036	0.0918377	1.23082	36	0.226371	0.400858	NA	0.684483	0	0.645179	Lrrc47 Kiaa1185	LRC47_MOUSE	Leucine-rich repeat-containing protein 47	0.645179	0.113036	0.39701	Q505F5
Q05793	Combo-Control	0.112969	0.0850661	1.32801	36	0.192533	0.358021	NA	0.982332	0	0.715494	Hspg2	PGBM_MOUSE	Basement membrane-specific heparan sulfate proteoglycan core protein (HSPG) [Cleaved into: Endorepellin; LG3 peptide]	0.715494	0.112969	0.446091	Q05793
Q9D0M5	Combo-Control	0.112497	0.124202	0.905751	36	0.37109	0.551409	NA	0	0	0.430521	Dynll2 Dlc2	DYL2_MOUSE	Dynein light chain 2, cytoplasmic (8 kDa dynein light chain b) (DLC8) (DLC8b) (Dynein light chain LC8-type 2)	0.430521	0.112497	0.258526	Q9D0M5
Q78JE5	Combo-Control	0.112422	0.142011	0.791639	25	0.436018	0.612485	NA	0.283333	0	0.360495	Fbxo22 Fbx22	FBX22_MOUSE	F-box only protein 22	0.360495	0.112422	0.212905	Q78JE5
Q8R016	Combo-Control	0.112349	0.128264	0.875918	36	0.386882	0.566918	NA	0.8	0	0.412422	Blmh	BLMH_MOUSE	Bleomycin hydrolase (BH) (BLM hydrolase) (BMH) (EC 3.4.22.40)	0.412422	0.112349	0.24648	Q8R016
O70572	Combo-Control	0.111486	0.53441	0.208616	10	0.838936	0.906135	NA	0.7	0	0.076271	Smpd2	NSMA_MOUSE	Sphingomyelin phosphodiesterase 2 (EC 3.1.4.12) (Lyso-platelet-activating factor-phospholipase C) (Lyso-PAF-PLC) (Neutral sphingomyelinase) (N-SMase) (nSMase)	0.076271	0.111486	0.0428073	O70572
B9EKI3	Combo-Control	0.111354	0.383112	0.290657	12	0.776276	0.872758	NA	0.65	0	0.109984	Tmf1 Ara160 Gm153	TMF1_MOUSE	TATA element modulatory factor (TMF) (Androgen receptor coactivator 160 kDa protein) (Androgen receptor-associated protein of 160 kDa)	0.109984	0.111354	0.0591064	B9EKI3
Q3UKC1	Combo-Control	0.110432	0.268285	0.411621	31	0.683449	0.809034	NA	0.391667	0	0.165294	Tax1bp1	TAXB1_MOUSE	Tax1-binding protein 1 homolog	0.165294	0.110432	0.0920332	Q3UKC1
P68181	Combo-Control	0.110254	0.121856	0.904788	36	0.371593	0.551609	NA	0.411538	0	0.429932	Prkacb Pkacb	KAPCB_MOUSE	cAMP-dependent protein kinase catalytic subunit beta (PKA C-beta) (EC 2.7.11.11)	0.429932	0.110254	0.258368	P68181
Q9CQX8	Combo-Control	0.109915	0.158137	0.695062	36	0.491479	0.661232	NA	0.216667	0	0.308495	Mrps36	RT36_MOUSE	28S ribosomal protein S36, mitochondrial (MRP-S36) (S36mt)	0.308495	0.109915	0.179646	Q9CQX8
P12265	Combo-Control	0.109831	0.103899	1.0571	36	0.29751	0.477203	NA	0.75	0	0.526498	Gusb Gus Gus-s	BGLR_MOUSE	Beta-glucuronidase (EC 3.2.1.31)	0.526498	0.109831	0.321297	P12265
P58404	Combo-Control	0.109543	0.133917	0.817991	26	0.420796	0.59754	NA	0.65	0	0.375928	Strn4 Zin	STRN4_MOUSE	Striatin-4 (Zinedin)	0.375928	0.109543	0.223633	P58404
Q80VJ2	Combo-Control	0.109126	0.136317	0.800533	34	0.428961	0.60492	NA	0.05	0	0.367583	Sra1	SRA1_MOUSE	Steroid receptor RNA activator 1 (Steroid receptor RNA activator protein) (SRAP)	0.367583	0.109126	0.218302	Q80VJ2
Q9DCW4	Combo-Control	0.10905	0.0516975	2.10938	36	0.0419312	0.133675	NA	0.864865	0	1.37746	Etfb	ETFB_MOUSE	Electron transfer flavoprotein subunit beta (Beta-ETF)	1.37746	0.10905	0.87395	Q9DCW4
Q62193	Combo-Control	0.108929	0.132376	0.822878	36	0.415995	0.592991	NA	0.225	0	0.380912	Rpa2 Rpa34	RFA2_MOUSE	Replication protein A 32 kDa subunit (RP-A p32) (Replication factor A protein 2) (RF-A protein 2) (Replication protein A 34 kDa subunit) (RP-A p34)	0.380912	0.108929	0.226952	Q62193
Q9WTR1	Combo-Control	0.10866	0.156604	0.693851	34	0.492489	0.662245	NA	0.35	0	0.307603	Trpv2 Grc	TRPV2_MOUSE	Transient receptor potential cation channel subfamily V member 2 (TrpV2) (Growth factor-regulated calcium channel) (GRC) (Osm-9-like TRP channel 2) (OTRPC2)	0.307603	0.10866	0.178981	Q9WTR1
Q6NXN1	Combo-Control	0.108318	0.126395	0.856984	34	0.397454	0.575737	NA	0.05	0	0.400713	Szrd1 D4Ertd22e	SZRD1_MOUSE	SUZ domain-containing protein 1	0.400713	0.108318	0.239776	Q6NXN1
Q9D172	Combo-Control	0.108024	0.0794653	1.35938	36	0.18248	0.348582	NA	0.708065	0	0.738786	Gatd3a D10Jhu81e	GAL3A_MOUSE	Glutamine amidotransferase-like class 1 domain-containing protein 3A, mitochondrial	0.738786	0.108024	0.457695	Q9D172
P47934	Combo-Control	0.107648	0.162973	0.660531	36	0.513118	0.677151	NA	0.25	0	0.289783	Crat	CACP_MOUSE	Carnitine O-acetyltransferase (Carnitine acetylase) (EC 2.3.1.7) (Carnitine acetyltransferase) (CAT) (CrAT)	0.289783	0.107648	0.169315	P47934
O35075	Combo-Control	0.107628	0.120543	0.892857	35	0.378032	0.558875	NA	0.361111	0	0.422471	Vps26c Dcra Dscr3 Dscra	VP26C_MOUSE	Vacuolar protein sorting-associated protein 26C (Down syndrome critical region protein 3 homolog) (Down syndrome critical region protein A homolog)	0.422471	0.107628	0.252685	O35075
Q91VZ6	Combo-Control	0.107198	0.119973	0.893515	36	0.377516	0.558492	NA	0	0	0.423065	Smap1	SMAP1_MOUSE	Stromal membrane-associated protein 1	0.423065	0.107198	0.252983	Q91VZ6
Q9CPW4	Combo-Control	0.107062	0.061432	1.74278	36	0.0899095	0.218093	NA	0.7525	0	1.04619	Arpc5	ARPC5_MOUSE	Actin-related protein 2/3 complex subunit 5 (Arp2/3 complex 16 kDa subunit) (p16-ARC)	1.04619	0.107062	0.661358	Q9CPW4
Q00623	Combo-Control	0.107044	0.240856	0.444429	36	0.659393	0.790837	NA	0.894737	0	0.180856	Apoa1	APOA1_MOUSE	Apolipoprotein A-I (Apo-AI) (ApoA-I) (Apolipoprotein A1) [Cleaved into: Proapolipoprotein A-I (ProapoA-I); Truncated apolipoprotein A-I]	0.180856	0.107044	0.101913	Q00623
P62962	Combo-Control	0.106937	0.0902349	1.1851	36	0.243744	0.418977	NA	0.891304	0	0.613067	Pfn1	PROF1_MOUSE	Profilin-1 (Profilin I)	0.613067	0.106937	0.37781	P62962
Q02013	Combo-Control	0.106586	0.448963	0.237405	36	0.813689	0.894666	NA	0	0	0.0895417	Aqp1	AQP1_MOUSE	Aquaporin-1 (AQP-1) (Aquaporin-CHIP) (Delayed early response protein 2) (DER2) (Water channel protein for red blood cells and kidney proximal tubule)	0.0895417	0.106586	0.048339	Q02013
P26039	Combo-Control	0.106368	0.0541787	1.96328	36	0.0573742	0.163142	NA	0.984763	0	1.24128	Tln1 Tln	TLN1_MOUSE	Talin-1	1.24128	0.106368	0.787433	P26039
P42669	Combo-Control	0.106087	0.0705854	1.50296	36	0.141573	0.295248	NA	0.54	0	0.84902	Pura	PURA_MOUSE	Transcriptional activator protein Pur-alpha (Purine-rich single-stranded DNA-binding protein alpha)	0.84902	0.106087	0.529813	P42669
Q9R1P4	Combo-Control	0.106003	0.13338	0.794747	36	0.431969	0.608175	NA	0.924812	0	0.364547	Psma1	PSA1_MOUSE	Proteasome subunit alpha type-1 (EC 3.4.25.1) (Macropain subunit C2) (Multicatalytic endopeptidase complex subunit C2) (Proteasome component C2) (Proteasome nu chain)	0.364547	0.106003	0.215972	Q9R1P4
Q3UGR5	Combo-Control	0.105886	0.154919	0.683491	36	0.498672	0.666636	NA	0.547222	0	0.302185	Hdhd2	HDHD2_MOUSE	Haloacid dehalogenase-like hydrolase domain-containing protein 2	0.302185	0.105886	0.176111	Q3UGR5
P12246	Combo-Control	0.105145	0.204802	0.513399	36	0.610809	0.756344	NA	0.333333	0	0.214094	Apcs Ptx2 Sap	SAMP_MOUSE	Serum amyloid P-component (SAP)	0.214094	0.105145	0.12128	P12246
Q3UMW7	Combo-Control	0.104901	0.107685	0.97415	35	0.336667	0.518004	NA	0.05	0	0.472799	Mapkapk3	MAPK3_MOUSE	MAP kinase-activated protein kinase 3 (MAPK-activated protein kinase 3) (MAPKAP kinase 3) (MAPKAP-K3) (MAPKAPK-3) (MK-3) (EC 2.7.11.1)	0.472799	0.104901	0.285667	Q3UMW7
Q920I9	Combo-Control	0.104865	0.15316	0.684674	35	0.498059	0.666251	NA	0	0	0.302719	Wdr7 Kiaa0541 Trag	WDR7_MOUSE	WD repeat-containing protein 7 (TGF-beta resistance-associated protein TRAG)	0.302719	0.104865	0.176362	Q920I9
Q71LX4	Combo-Control	0.104084	0.0708067	1.46998	36	0.150254	0.307318	NA	0.544444	0	0.823175	Tln2	TLN2_MOUSE	Talin-2	0.823175	0.104084	0.512412	Q71LX4
P05064	Combo-Control	0.103925	0.139748	0.743664	36	0.461906	0.634923	NA	0.96587	0	0.335446	Aldoa Aldo1	ALDOA_MOUSE	Fructose-bisphosphate aldolase A (EC 4.1.2.13) (Aldolase 1) (Muscle-type aldolase)	0.335446	0.103925	0.197279	P05064
P62983	Combo-Control	0.103639	0.108655	0.953829	36	0.346531	0.527019	NA	0.84375	0	0.460258	Rps27a Uba80 Ubcep1	RS27A_MOUSE	Ubiquitin-40S ribosomal protein S27a (Ubiquitin carboxyl extension protein 80) [Cleaved into: Ubiquitin; 40S ribosomal protein S27a]	0.460258	0.103639	0.278174	P62983
Q99KR7	Combo-Control	0.103351	0.194225	0.53212	34	0.598103	0.747113	NA	0.183333	0	0.223224	Ppif	PPIF_MOUSE	Peptidyl-prolyl cis-trans isomerase F, mitochondrial (PPIase F) (EC 5.2.1.8) (Cyclophilin D) (CyP-D) (CypD) (Cyclophilin F) (Rotamase F)	0.223224	0.103351	0.126614	Q99KR7
B1AVZ0	Combo-Control	0.10332	0.17522	0.589657	25	0.560713	0.717963	NA	0.35	0	0.25126	Uprt	UPP_MOUSE	Uracil phosphoribosyltransferase homolog	0.25126	0.10332	0.143898	B1AVZ0
Q8BRT1	Combo-Control	0.103299	0.125664	0.822024	35	0.416628	0.593309	NA	0	0	0.380251	Clasp2 Kiaa0627	CLAP2_MOUSE	CLIP-associating protein 2 (Cytoplasmic linker-associated protein 2)	0.380251	0.103299	0.226719	Q8BRT1
Q91ZA3	Combo-Control	0.103285	0.119257	0.866068	36	0.392189	0.571146	NA	0.740323	0	0.406505	Pcca	PCCA_MOUSE	Propionyl-CoA carboxylase alpha chain, mitochondrial (PCCase subunit alpha) (EC 6.4.1.3) (Propanoyl-CoA:carbon dioxide ligase subunit alpha)	0.406505	0.103285	0.243253	Q91ZA3
Q9D8L5	Combo-Control	0.102763	0.111747	0.919599	36	0.363903	0.543726	NA	0.445833	0	0.439014	Ccdc91 Ggabp	CCD91_MOUSE	Coiled-coil domain-containing protein 91 (GGA-binding partner)	0.439014	0.102763	0.26462	Q9D8L5
Q69Z37	Combo-Control	0.102552	0.127988	0.801262	36	0.428237	0.604685	NA	0.623333	0	0.368316	Samd9l Kiaa2005	SAM9L_MOUSE	Sterile alpha motif domain-containing protein 9-like (SAM domain-containing protein 9-like)	0.368316	0.102552	0.218471	Q69Z37
Q9ER00	Combo-Control	0.10196	0.0579288	1.76009	36	0.0868887	0.213147	NA	0.363333	0	1.06104	Stx12	STX12_MOUSE	Syntaxin-12	1.06104	0.10196	0.67132	Q9ER00
Q61687	Combo-Control	0.101845	0.14549	0.700017	35	0.488544	0.658367	NA	0.436364	0	0.311096	Atrx Hp1bp2 Xnp	ATRX_MOUSE	Transcriptional regulator ATRX (EC 3.6.4.12) (ATP-dependent helicase ATRX) (HP1 alpha-interacting protein) (HP1-BP38 protein) (Heterochromatin protein 2) (X-linked nuclear protein)	0.311096	0.101845	0.181532	Q61687
Q8BWG8	Combo-Control	0.101141	0.0745183	1.35726	36	0.183147	0.349298	NA	0.535714	0	0.7372	Arrb1	ARRB1_MOUSE	Beta-arrestin-1 (Arrestin beta-1)	0.7372	0.101141	0.456804	Q8BWG8
P97384	Combo-Control	0.100842	0.0565451	1.78339	36	0.0829552	0.206532	NA	0.864865	0	1.08116	Anxa11 Anx11	ANX11_MOUSE	Annexin A11 (Annexin XI) (Annexin-11) (Calcyclin-associated annexin 50) (CAP-50)	1.08116	0.100842	0.685013	P97384
Q9CYA0	Combo-Control	0.100708	0.0847094	1.18886	36	0.242278	0.418112	NA	0.229167	0	0.615686	Creld2	CREL2_MOUSE	Protein disulfide isomerase Creld2 (EC 5.3.4.1) (Cysteine-rich with EGF-like domain protein 2)	0.615686	0.100708	0.378707	Q9CYA0
Q9Z1G3	Combo-Control	0.100133	0.0796103	1.25779	36	0.216567	0.387789	NA	0.558333	0	0.664407	Atp6v1c1 Atp6c Atp6c1 Vatc	VATC1_MOUSE	V-type proton ATPase subunit C 1 (V-ATPase subunit C 1) (Vacuolar proton pump subunit C 1)	0.664407	0.100133	0.411405	Q9Z1G3
P42859	Combo-Control	0.100048	0.254099	0.393738	36	0.696097	0.817128	NA	0.125	0	0.15733	Htt Hd Hdh	HD_MOUSE	Huntingtin (Huntington disease protein homolog) (HD protein homolog) [Cleaved into: Huntingtin, myristoylated N-terminal fragment]	0.15733	0.100048	0.0877097	P42859
P16330	Combo-Control	0.0995021	0.147846	0.673013	36	0.505237	0.672307	NA	0.51	0	0.296505	Cnp Cnp1	CN37_MOUSE	2',3'-cyclic-nucleotide 3'-phosphodiesterase (CNP) (CNPase) (EC 3.1.4.37)	0.296505	0.0995021	0.172432	P16330
O88593	Combo-Control	0.0994766	0.210164	0.473328	36	0.638837	0.776983	NA	0.172222	0	0.19461	Pglyrp1 Pglyrp Pgrp Pgrps Tag7	PGRP1_MOUSE	Peptidoglycan recognition protein 1 (Cytokine tag7) (Peptidoglycan recognition protein short) (PGRP-S)	0.19461	0.0994766	0.109589	O88593
Q8CI43	Combo-Control	0.0993405	0.110536	0.898713	36	0.374777	0.555387	NA	0.575	0	0.426227	Myl6b	MYL6B_MOUSE	Myosin light chain 6B (Smooth muscle and nonmuscle myosin light chain alkali 6B)	0.426227	0.0993405	0.255404	Q8CI43
P24668	Combo-Control	0.0981757	0.0987958	0.993723	36	0.32699	0.507612	NA	0.615385	0	0.485465	M6pr 46mpr	MPRD_MOUSE	Cation-dependent mannose-6-phosphate receptor (CD Man-6-P receptor) (CD-MPR) (46 kDa mannose 6-phosphate receptor) (MPR 46)	0.485465	0.0981757	0.294468	P24668
Q99PG2	Combo-Control	0.0981602	0.108661	0.903361	36	0.372339	0.552528	NA	0.788636	0	0.429061	Ogfr	OGFR_MOUSE	Opioid growth factor receptor (OGFr) (Zeta-type opioid receptor)	0.429061	0.0981602	0.257645	Q99PG2
Q3UZZ4	Combo-Control	0.0980459	0.209219	0.468629	36	0.64216	0.778636	NA	0.508333	0	0.192357	Olfm4	OLFM4_MOUSE	Olfactomedin-4 (OLM4)	0.192357	0.0980459	0.108665	Q3UZZ4
P40124	Combo-Control	0.0976844	0.103288	0.94575	36	0.350581	0.530946	NA	0.958678	0	0.455212	Cap1 Cap	CAP1_MOUSE	Adenylyl cyclase-associated protein 1 (CAP 1)	0.455212	0.0976844	0.27495	P40124
Q60870	Combo-Control	0.0976549	0.117643	0.830092	36	0.411958	0.589947	NA	0.458333	0	0.385147	Reep5 Dp1	REEP5_MOUSE	Receptor expression-enhancing protein 5 (GP106) (Polyposis locus protein 1 homolog) (Protein TB2 homolog)	0.385147	0.0976549	0.229187	Q60870
P59999	Combo-Control	0.0976442	0.0728665	1.34004	36	0.188629	0.354184	NA	0.767442	0	0.724392	Arpc4 Arc20	ARPC4_MOUSE	Actin-related protein 2/3 complex subunit 4 (Arp2/3 complex 20 kDa subunit) (p20-ARC)	0.724392	0.0976442	0.450771	P59999
Q6ZQK5	Combo-Control	0.0975586	0.0752242	1.2969	36	0.202915	0.371598	NA	0.641304	0	0.692686	Acap2 Centb2 Kiaa0041	ACAP2_MOUSE	Arf-GAP with coiled-coil, ANK repeat and PH domain-containing protein 2 (Centaurin-beta-2) (Cnt-b2)	0.692686	0.0975586	0.429927	Q6ZQK5
Q9JJL8	Combo-Control	0.0972107	0.0718686	1.35262	35	0.184852	0.350026	NA	0.458333	0	0.733175	Sars2 Sarsm	SYSM_MOUSE	Serine--tRNA ligase, mitochondrial (EC 6.1.1.11) (SerRSmt) (Seryl-tRNA synthetase) (SerRS) (Seryl-tRNA(Ser/Sec) synthetase)	0.733175	0.0972107	0.4559	Q9JJL8
Q99KE1	Combo-Control	0.0970979	0.0939368	1.03365	36	0.308193	0.488305	NA	0.786957	0	0.511177	Me2	MAOM_MOUSE	NAD-dependent malic enzyme, mitochondrial (NAD-ME) (EC 1.1.1.38) (Malic enzyme 2)	0.511177	0.0970979	0.311309	Q99KE1
Q99LX0	Combo-Control	0.0970796	0.111936	0.867279	36	0.391534	0.571146	NA	0.811321	0	0.407231	Park7	PARK7_MOUSE	Protein/nucleic acid deglycase DJ-1 (EC 3.1.2.-) (EC 3.5.1.-) (EC 3.5.1.124) (Maillard deglycase) (Parkinson disease protein 7 homolog) (Parkinsonism-associated deglycase) (Protein DJ-1) (DJ-1)	0.407231	0.0970796	0.243253	Q99LX0
Q61739	Combo-Control	0.0970334	0.455423	0.213062	11	0.835176	0.904097	NA	0.55	0	0.0782221	Itga6	ITA6_MOUSE	Integrin alpha-6 (CD49 antigen-like family member F) (VLA-6) (CD antigen CD49f) [Cleaved into: Integrin alpha-6 heavy chain; Integrin alpha-6 light chain; Processed integrin alpha-6 (Alpha6p)]	0.0782221	0.0970334	0.043785	Q61739
Q64277	Combo-Control	0.0968421	0.116844	0.828815	36	0.412671	0.590398	NA	0.85625	0	0.384396	Bst1 Bp-3 Bp3 Ly65	BST1_MOUSE	ADP-ribosyl cyclase/cyclic ADP-ribose hydrolase 2 (EC 3.2.2.6) (ADP-ribosyl cyclase 2) (Antigen BP3) (BP-3 alloantigen) (Bone marrow stromal antigen 1) (BST-1) (Cyclic ADP-ribose hydrolase 2) (cADPr hydrolase 2) (Leukocyte antigen 65) (Ly-65) (CD antigen CD157)	0.384396	0.0968421	0.228855	Q64277
P45376	Combo-Control	0.0967796	0.0766853	1.26204	36	0.215051	0.386077	NA	0.893617	0	0.667459	Akr1b1 Akr1b3 Aldor1 Aldr1 Alr2	ALDR_MOUSE	Aldo-keto reductase family 1 member B1 (EC 1.1.1.300) (EC 1.1.1.372) (EC 1.1.1.54) (Aldehyde reductase) (Aldo-keto reductase family 1 member B3) (Aldose reductase) (AR) (EC 1.1.1.21)	0.667459	0.0967796	0.413326	P45376
Q3UFS4	Combo-Control	0.0966709	0.244878	0.394772	24	0.696498	0.817128	NA	0.4	0	0.15708	Gpatch11 Ccdc75	GPT11_MOUSE	G patch domain-containing protein 11 (Coiled-coil domain-containing protein 75)	0.15708	0.0966709	0.0877097	Q3UFS4
Q62422	Combo-Control	0.0966135	0.080165	1.20518	36	0.235995	0.412019	NA	0.765854	0	0.627097	Ostf1 Sh3d3 Sh3p2	OSTF1_MOUSE	Osteoclast-stimulating factor 1 (SH3 domain protein 3)	0.627097	0.0966135	0.385083	Q62422
Q8BKZ9	Combo-Control	0.0965622	0.0672575	1.43571	36	0.159718	0.319289	NA	0	0	0.796646	Pdhx	ODPX_MOUSE	Pyruvate dehydrogenase protein X component, mitochondrial (Dihydrolipoamide dehydrogenase-binding protein of pyruvate dehydrogenase complex) (Lipoyl-containing pyruvate dehydrogenase complex component X)	0.796646	0.0965622	0.495816	Q8BKZ9
Q9JI11	Combo-Control	0.0964308	0.0987249	0.976763	36	0.335205	0.517405	NA	0.692	0	0.47469	Stk4 Mst1	STK4_MOUSE	Serine/threonine-protein kinase 4 (EC 2.7.11.1) (Mammalian STE20-like protein kinase 1) (MST-1) (STE20-like kinase MST1) [Cleaved into: Serine/threonine-protein kinase 4 37kDa subunit (MST1/N); Serine/threonine-protein kinase 4 18kDa subunit (MST1/C)]	0.47469	0.0964308	0.28617	Q9JI11
Q8R146	Combo-Control	0.096349	0.101699	0.947392	36	0.349755	0.530251	NA	0.744118	0	0.456236	Apeh	APEH_MOUSE	Acylamino-acid-releasing enzyme (AARE) (EC 3.4.19.1) (Acyl-peptide hydrolase) (APH) (Acylaminoacyl-peptidase)	0.456236	0.096349	0.275519	Q8R146
Q9D8U8	Combo-Control	0.0962254	0.0794371	1.21134	36	0.233657	0.409936	NA	0.84127	0	0.631422	Snx5	SNX5_MOUSE	Sorting nexin-5	0.631422	0.0962254	0.387284	Q9D8U8
Q8VCG4	Combo-Control	0.0961663	0.240572	0.399741	26	0.692613	0.815656	NA	0.5	0	0.15951	C8g	CO8G_MOUSE	Complement component C8 gamma chain	0.15951	0.0961663	0.0884928	Q8VCG4
Q9CR68	Combo-Control	0.0959753	0.115076	0.83402	36	0.40977	0.588367	NA	0.730882	0	0.38746	Uqcrfs1	UCRI_MOUSE	Cytochrome b-c1 complex subunit Rieske, mitochondrial (EC 7.1.1.8) (Complex III subunit 5) (Cytochrome b-c1 complex subunit 5) (Rieske iron-sulfur protein) (RISP) (Rieske protein UQCRFS1) (Ubiquinol-cytochrome c reductase iron-sulfur subunit) [Cleaved into: Cytochrome b-c1 complex subunit 9 (Su9) (Subunit 9) (8 kDa subunit 9) (Complex III subunit IX) (Cytochrome b-c1 complex subunit 11) (UQCRFS1 …	0.38746	0.0959753	0.230352	Q9CR68
P97864	Combo-Control	0.0957229	0.11304	0.846804	36	0.402699	0.581096	NA	0.604	0	0.39502	Casp7 Lice2 Mch3	CASP7_MOUSE	Caspase-7 (CASP-7) (EC 3.4.22.60) (Apoptotic protease Mch-3) (Cysteine protease LICE2) [Cleaved into: Caspase-7 subunit p20; Caspase-7 subunit p11]	0.39502	0.0957229	0.235752	P97864
P19536	Combo-Control	0.0949743	0.0990963	0.958404	36	0.344252	0.525469	NA	0.671667	0	0.463124	Cox5b	COX5B_MOUSE	Cytochrome c oxidase subunit 5B, mitochondrial (Cytochrome c oxidase polypeptide Vb)	0.463124	0.0949743	0.279453	P19536
Q4LDD4	Combo-Control	0.0948632	0.159392	0.595157	36	0.555461	0.713132	NA	0.754762	0	0.255346	Arap1 Centd2 Kiaa0782	ARAP1_MOUSE	Arf-GAP with Rho-GAP domain, ANK repeat and PH domain-containing protein 1 (Centaurin-delta-2) (Cnt-d2)	0.255346	0.0948632	0.14683	Q4LDD4
P48024	Combo-Control	0.0939415	0.12995	0.722903	36	0.47441	0.646341	NA	0.426667	0	0.323846	Eif1 Sui1 Sui1-rs1	EIF1_MOUSE	Eukaryotic translation initiation factor 1 (eIF1) (Protein translation factor SUI1 homolog)	0.323846	0.0939415	0.189538	P48024
P83917	Combo-Control	0.0931029	0.107439	0.866561	36	0.391921	0.571146	NA	0.595238	0	0.406801	Cbx1 Cbx	CBX1_MOUSE	Chromobox protein homolog 1 (Heterochromatin protein 1 homolog beta) (HP1 beta) (Heterochromatin protein p25) (M31) (Modifier 1 protein)	0.406801	0.0931029	0.243253	P83917
Q64430	Combo-Control	0.0927607	0.109003	0.850995	36	0.400398	0.578893	NA	0.491667	0	0.397509	Atp7a Mnk	ATP7A_MOUSE	Copper-transporting ATPase 1 (EC 7.2.2.8) (Copper pump 1) (Menkes disease-associated protein homolog)	0.397509	0.0927607	0.237402	Q64430
O88342	Combo-Control	0.0926377	0.0912255	1.01548	36	0.316653	0.497074	NA	0.939024	0	0.499416	Wdr1	WDR1_MOUSE	WD repeat-containing protein 1 (Actin-interacting protein 1) (AIP1)	0.499416	0.0926377	0.303579	O88342
Q61735	Combo-Control	0.0924133	0.12301	0.751266	36	0.457376	0.631254	NA	0.0285714	0	0.339727	Cd47	CD47_MOUSE	Leukocyte surface antigen CD47 (Integrin-associated protein) (IAP) (CD antigen CD47)	0.339727	0.0924133	0.199796	Q61735
Q8BH95	Combo-Control	0.0922092	0.0733128	1.25775	36	0.21658	0.387789	NA	0.8	0	0.664383	Echs1	ECHM_MOUSE	Enoyl-CoA hydratase, mitochondrial (EC 4.2.1.17) (Enoyl-CoA hydratase 1) (Short-chain enoyl-CoA hydratase) (SCEH)	0.664383	0.0922092	0.411405	Q8BH95
P53569	Combo-Control	0.0920884	0.241519	0.381288	23	0.706489	0.824704	NA	0.583333	0	0.150895	Cebpz Cbf2 Cebpa-rs1	CEBPZ_MOUSE	CCAAT/enhancer-binding protein zeta (CCAAT-box-binding transcription factor) (CBF) (CCAAT-binding factor)	0.150895	0.0920884	0.0837018	P53569
Q9CZG3	Combo-Control	0.0920351	0.144271	0.637932	32	0.528057	0.691443	NA	0.05	0	0.277319	Commd8	COMD8_MOUSE	COMM domain-containing protein 8	0.277319	0.0920351	0.160244	Q9CZG3
Q2TPA8	Combo-Control	0.0918063	0.180158	0.509589	35	0.613538	0.757892	NA	0.425	0	0.212159	Hsdl2	HSDL2_MOUSE	Hydroxysteroid dehydrogenase-like protein 2 (EC 1.-.-.-)	0.212159	0.0918063	0.120392	Q2TPA8
P62774	Combo-Control	0.0917959	0.113021	0.8122	36	0.422015	0.598429	NA	0.830508	0	0.374672	Mtpn Gcdp	MTPN_MOUSE	Myotrophin (Granule cell differentiation protein) (Protein V-1)	0.374672	0.0917959	0.222987	P62774
O08664	Combo-Control	0.091539	0.973392	0.0940412	3	0.931005	0.964089	NA	0.85	0	0.0310478	NA	NA	NA	0.0310478	0.091539	0.0158829	O08664;Q921K9;Q9CXE2
Q64010	Combo-Control	0.0915288	0.0992515	0.922191	36	0.362569	0.542666	NA	0.713793	0	0.44061	Crk Crko	CRK_MOUSE	Adapter molecule crk (Proto-oncogene c-Crk) (p38)	0.44061	0.0915288	0.265468	Q64010
Q9JJU8	Combo-Control	0.0913542	0.113308	0.806244	36	0.425396	0.602044	NA	0.808	0	0.371206	Sh3bgrl	SH3L1_MOUSE	SH3 domain-binding glutamic acid-rich-like protein	0.371206	0.0913542	0.220372	Q9JJU8
O70493	Combo-Control	0.0911266	0.089177	1.02186	36	0.313664	0.493567	NA	0.285714	0	0.503535	Snx12	SNX12_MOUSE	Sorting nexin-12 (SDP8 protein)	0.503535	0.0911266	0.306654	O70493
O55106	Combo-Control	0.090673	0.0808604	1.12135	36	0.269562	0.447463	NA	0.706452	0	0.569341	Strn	STRN_MOUSE	Striatin	0.569341	0.090673	0.349243	O55106
Q9WVQ5	Combo-Control	0.0905732	0.111406	0.813001	36	0.421562	0.598023	NA	0.191667	0	0.375139	Apip Mmrp19	MTNB_MOUSE	Methylthioribulose-1-phosphate dehydratase (MTRu-1-P dehydratase) (EC 4.2.1.109) (APAF1-interacting protein) (Monocyte/macrophage protein 19)	0.375139	0.0905732	0.223282	Q9WVQ5
Q99NH0	Combo-Control	0.0905071	0.0893257	1.01323	36	0.317714	0.498358	NA	0.71	0	0.497964	Ankrd17 Foe Gtar Kiaa0697	ANR17_MOUSE	Ankyrin repeat domain-containing protein 17 (Ankyrin repeat domain-containing protein FOE) (Gene trap ankyrin repeat protein)	0.497964	0.0905071	0.302459	Q99NH0
O88384	Combo-Control	0.0900445	0.0756465	1.19033	36	0.241706	0.417956	NA	0.233333	0	0.616713	Vti1b Vti1l1	VTI1B_MOUSE	Vesicle transport through interaction with t-SNAREs homolog 1B (Vesicle transport v-SNARE protein Vti1-like 1) (Vti1-rp1)	0.616713	0.0900445	0.37887	O88384
Q920Q4	Combo-Control	0.0898457	0.124482	0.721754	36	0.475108	0.647088	NA	0.563889	0	0.323208	Vps16	VPS16_MOUSE	Vacuolar protein sorting-associated protein 16 homolog (mVPS16)	0.323208	0.0898457	0.189037	Q920Q4
Q60936	Combo-Control	0.0897992	0.587333	0.152893	7	0.882796	0.933082	NA	0.75	0	0.0541394	Coq8a Adck3 Cabc1	COQ8A_MOUSE	Atypical kinase COQ8A, mitochondrial (EC 2.7.-.-) (Chaperone activity of bc1 complex-like) (Chaperone-ABC1-like) (Coenzyme Q protein 8A) (aarF domain-containing protein kinase 3)	0.0541394	0.0897992	0.03008	Q60936
Q5SXY1	Combo-Control	0.0897901	0.0754097	1.1907	36	0.241565	0.417878	NA	0.628571	0	0.616966	Specc1 Cytsb Kiaa4061	CYTSB_MOUSE	Cytospin-B (Sperm antigen with calponin homology and coiled-coil domains 1)	0.616966	0.0897901	0.37895	Q5SXY1
Q02105	Combo-Control	0.0891264	0.0721923	1.23457	36	0.224989	0.399061	NA	0.166667	0	0.647839	C1qc C1qg	C1QC_MOUSE	Complement C1q subcomponent subunit C	0.647839	0.0891264	0.39896	Q02105
Q8K1A6	Combo-Control	0.0890977	0.0807743	1.10304	36	0.277327	0.456119	NA	0.45	0	0.557008	Cc2d1a	C2D1A_MOUSE	Coiled-coil and C2 domain-containing protein 1A (Five prime repressor element under dual repression-binding protein 1) (FRE under dual repression-binding protein 1) (Freud-1)	0.557008	0.0890977	0.340922	Q8K1A6
Q14CH1	Combo-Control	0.0887199	0.105239	0.843031	34	0.405103	0.583402	NA	0.1	0	0.392435	Mocos	MOCOS_MOUSE	Molybdenum cofactor sulfurase (MCS) (MOS) (MoCo sulfurase) (EC 2.8.1.9) (Molybdenum cofactor sulfurtransferase)	0.392435	0.0887199	0.234032	Q14CH1
P70295	Combo-Control	0.0883033	0.204785	0.4312	35	0.668967	0.797279	NA	0.355556	0	0.174595	Aup1	AUP1_MOUSE	Ancient ubiquitous protein 1	0.174595	0.0883033	0.0983896	P70295
P49722	Combo-Control	0.087425	0.137378	0.63638	36	0.528554	0.691885	NA	0.866892	0	0.27691	Psma2 Lmpc3	PSA2_MOUSE	Proteasome subunit alpha type-2 (EC 3.4.25.1) (Macropain subunit C3) (Multicatalytic endopeptidase complex subunit C3) (Proteasome component C3)	0.27691	0.087425	0.159966	P49722
Q9JLQ2	Combo-Control	0.0868105	0.0656088	1.32315	36	0.194127	0.360214	NA	0.7125	0	0.711914	Git2	GIT2_MOUSE	ARF GTPase-activating protein GIT2 (ARF GAP GIT2) (Cool-interacting tyrosine-phosphorylated protein 2) (CAT-2) (CAT2) (G protein-coupled receptor kinase-interactor 2) (GRK-interacting protein 2)	0.711914	0.0868105	0.44344	Q9JLQ2
O09161	Combo-Control	0.0867322	0.412427	0.210297	19	0.835675	0.904411	NA	0.533333	0	0.0779628	Casq2	CASQ2_MOUSE	Calsequestrin-2 (Calsequestrin, cardiac muscle isoform)	0.0779628	0.0867322	0.0436339	O09161
Q9D7E3	Combo-Control	0.0865324	0.0741009	1.16776	36	0.250578	0.427341	NA	0	0	0.601057	Ovca2	OVCA2_MOUSE	Esterase OVCA2 (EC 3.1.2.-) (Ovarian cancer-associated gene 2 protein homolog)	0.601057	0.0865324	0.369226	Q9D7E3
Q8K003	Combo-Control	0.0865151	0.205252	0.421507	35	0.675962	0.803237	NA	0.222222	0	0.170077	Tma7 Ccdc72	TMA7_MOUSE	Translation machinery-associated protein 7 (Coiled-coil domain-containing protein 72)	0.170077	0.0865151	0.0951561	Q8K003
P47199	Combo-Control	0.0861439	0.0906278	0.950524	36	0.348184	0.528607	NA	0.325	0	0.458191	Cryz	QOR_MOUSE	Quinone oxidoreductase (EC 1.6.5.5) (NADPH:quinone reductase) (Zeta-crystallin)	0.458191	0.0861439	0.276867	P47199
E9Q3L2	Combo-Control	0.0859484	0.127104	0.676203	35	0.503356	0.670832	NA	0.425	0	0.298125	Pi4ka Pik4 Pik4ca	PI4KA_MOUSE	Phosphatidylinositol 4-kinase alpha (PI4-kinase alpha) (PI4K-alpha) (PtdIns-4-kinase alpha) (EC 2.7.1.67)	0.298125	0.0859484	0.173386	E9Q3L2
Q9WV96	Combo-Control	0.0857955	0.0857246	1.00083	36	0.32359	0.505043	NA	0	0	0.490005	Timm10b Fxc1 Tim9b Timm9b	T10B_MOUSE	Mitochondrial import inner membrane translocase subunit Tim10 B (Mitochondrial import inner membrane translocase subunit Tim9 B) (TIMM10B) (Tim10b)	0.490005	0.0857955	0.296672	Q9WV96
O09159	Combo-Control	0.08578	0.0824343	1.04059	36	0.305006	0.484927	NA	0.852632	0	0.515692	Man2b1 Laman Man2b Manb	MA2B1_MOUSE	Lysosomal alpha-mannosidase (Laman) (EC 3.2.1.24) (Lysosomal acid alpha-mannosidase) (Mannosidase alpha class 2B member 1) (Mannosidase alpha-B)	0.515692	0.08578	0.314324	O09159
P48428	Combo-Control	0.0857306	0.101732	0.842711	36	0.404954	0.583382	NA	0	0	0.392594	Tbca	TBCA_MOUSE	Tubulin-specific chaperone A (TCP1-chaperonin cofactor A) (Tubulin-folding cofactor A) (CFA)	0.392594	0.0857306	0.234047	P48428
Q8VD75	Combo-Control	0.085662	0.101527	0.843734	36	0.40439	0.582966	NA	0.602273	0	0.3932	Hip1 Kiaa4113	HIP1_MOUSE	Huntingtin-interacting protein 1 (HIP-1) (Huntingtin-interacting protein I) (HIP-I)	0.3932	0.085662	0.234357	Q8VD75
Q8K203	Combo-Control	0.0855924	0.484406	0.176695	29	0.860976	0.919645	NA	0.48	0	0.065009	Neil3	NEIL3_MOUSE	Endonuclease 8-like 3 (EC 3.2.2.-) (EC 4.2.99.18) (DNA glycosylase FPG2) (DNA glycosylase/AP lyase Neil3) (Endonuclease VIII-like 3) (Nei-like protein 3)	0.065009	0.0855924	0.0363797	Q8K203
Q9CQT5	Combo-Control	0.0850992	0.157551	0.540138	24	0.594079	0.743798	NA	0.4	0	0.226156	Pomp	POMP_MOUSE	Proteasome maturation protein (Proteassemblin) (Protein UMP1 homolog) (mUMP1)	0.226156	0.0850992	0.128545	Q9CQT5
Q5NCF2	Combo-Control	0.0844918	0.113709	0.743054	36	0.46227	0.635183	NA	0.3	0	0.335104	Trappc1	TPPC1_MOUSE	Trafficking protein particle complex subunit 1	0.335104	0.0844918	0.197101	Q5NCF2
Q4PJX1	Combo-Control	0.0841711	0.196528	0.428291	34	0.67114	0.799257	NA	0.743333	0	0.173187	Odr4	ODR4_MOUSE	Protein odr-4 homolog (mODR-4)	0.173187	0.0841711	0.0973137	Q4PJX1
Q9R0Y5	Combo-Control	0.0838632	0.31089	0.269752	36	0.788892	0.879059	NA	0.886364	0	0.102983	Ak1	KAD1_MOUSE	Adenylate kinase isoenzyme 1 (AK 1) (EC 2.7.4.3) (EC 2.7.4.6) (ATP-AMP transphosphorylase 1) (ATP:AMP phosphotransferase) (Adenylate monophosphate kinase) (Myokinase)	0.102983	0.0838632	0.0559818	Q9R0Y5
Q8K0V4	Combo-Control	0.0838393	1.61675	0.0518569	11	0.959572	0.979192	NA	0.866667	0	0.0179222	Cnot3 Not3	CNOT3_MOUSE	CCR4-NOT transcription complex subunit 3 (CCR4-associated factor 3)	0.0179222	0.0838393	0.00913196	Q8K0V4
O35643	Combo-Control	0.0837857	0.0956784	0.875702	36	0.386998	0.566918	NA	0.723611	0	0.412291	Ap1b1 Adtb1	AP1B1_MOUSE	AP-1 complex subunit beta-1 (Adaptor protein complex AP-1 subunit beta-1) (Adaptor-related protein complex 1 subunit beta-1) (Beta-1-adaptin) (Beta-adaptin 1) (Clathrin assembly protein complex 1 beta large chain) (Golgi adaptor HA1/AP1 adaptin beta subunit)	0.412291	0.0837857	0.24648	O35643
Q6PGH2	Combo-Control	0.0837425	0.177429	0.471977	36	0.639792	0.777649	NA	0.0333333	0	0.193961	Jpt2 D17Ertd441e Hn1l	JUPI2_MOUSE	Jupiter microtubule associated homolog 2 (Hematological and neurological expressed 1-like protein) (HN1-like protein)	0.193961	0.0837425	0.109216	Q6PGH2
Q99LR1	Combo-Control	0.0836955	0.120057	0.697132	36	0.490198	0.660186	NA	0.718571	0	0.309629	Abhd12	ABD12_MOUSE	Lysophosphatidylserine lipase ABHD12 (EC 3.1.1.-) (2-arachidonoylglycerol hydrolase ABHD12) (Abhydrolase domain-containing protein 12) (Monoacylglycerol lipase ABHD12) (EC 3.1.1.23) (Oxidized phosphatidylserine lipase ABHD12) (EC 3.1.-.-)	0.309629	0.0836955	0.180334	Q99LR1
Q9QYE6	Combo-Control	0.083605	0.0878064	0.952152	35	0.347549	0.527868	NA	0.664286	0	0.458984	Golga5 Retii	GOGA5_MOUSE	Golgin subfamily A member 5 (Golgin-84) (Protein Ret-II) (Protein Sumiko)	0.458984	0.083605	0.277475	Q9QYE6
O70480	Combo-Control	0.0835861	0.558177	0.149748	8	0.88467	0.933472	NA	0.7	0	0.0532188	Vamp4	VAMP4_MOUSE	Vesicle-associated membrane protein 4 (VAMP-4)	0.0532188	0.0835861	0.0298989	O70480
Q8K0U4	Combo-Control	0.0835577	0.153482	0.544412	32	0.589932	0.740741	NA	0.225	0	0.229198	Hspa12a Kiaa0417	HS12A_MOUSE	Heat shock 70 kDa protein 12A	0.229198	0.0835577	0.130333	Q8K0U4
P42128	Combo-Control	0.0830083	0.15675	0.52956	34	0.599858	0.748444	NA	0.05	0	0.221951	Foxk1 Mnf	FOXK1_MOUSE	Forkhead box protein K1 (Myocyte nuclear factor) (MNF)	0.221951	0.0830083	0.125841	P42128
P56376	Combo-Control	0.0829452	0.161101	0.514864	34	0.609979	0.755859	NA	0.0833333	0	0.214685	Acyp1 Acype	ACYP1_MOUSE	Acylphosphatase-1 (EC 3.6.1.7) (Acylphosphatase, organ-common type isozyme) (Acylphosphate phosphohydrolase 1)	0.214685	0.0829452	0.121559	P56376
P62996	Combo-Control	0.0824652	0.098375	0.838274	36	0.407408	0.585751	NA	0.677419	0	0.38997	Tra2b Sfrs10 Silg41	TRA2B_MOUSE	Transformer-2 protein homolog beta (TRA-2 beta) (TRA2-beta) (Silica-induced gene 41 protein) (SIG-41) (Splicing factor, arginine/serine-rich 10) (Transformer-2 protein homolog B)	0.38997	0.0824652	0.232287	P62996
Q9WUM3	Combo-Control	0.082428	0.173028	0.476386	36	0.636678	0.775808	NA	0.882099	0	0.19608	Coro1b	COR1B_MOUSE	Coronin-1B (Coronin-2)	0.19608	0.082428	0.110246	Q9WUM3
Q3TDD9	Combo-Control	0.082295	0.123348	0.667176	36	0.508914	0.674719	NA	0.075	0	0.293355	Ppp1r21 Ccdc128 Klraq1	PPR21_MOUSE	Protein phosphatase 1 regulatory subunit 21 (Coiled-coil domain-containing protein 128) (KLRAQ motif-containing protein 1)	0.293355	0.082295	0.170877	Q3TDD9
P40336	Combo-Control	0.0822349	0.0639417	1.28609	36	0.206621	0.376006	NA	0.602083	0	0.684825	Vps26a Vps26	VP26A_MOUSE	Vacuolar protein sorting-associated protein 26A (H<beta>58 protein) (H beta 58) (Vesicle protein sorting 26A) (mVPS26)	0.684825	0.0822349	0.424805	P40336
Q9DCS2	Combo-Control	0.0821779	0.163939	0.501272	33	0.619507	0.761795	NA	0.425	0	0.207954	Mettl26	MTL26_MOUSE	Methyltransferase-like 26	0.207954	0.0821779	0.118162	Q9DCS2
P24527	Combo-Control	0.0821024	0.0945865	0.868015	36	0.391136	0.571053	NA	0.913158	0	0.407672	Lta4h	LKHA4_MOUSE	Leukotriene A-4 hydrolase (LTA-4 hydrolase) (EC 3.3.2.6) (Leukotriene A(4) hydrolase)	0.407672	0.0821024	0.243323	P24527
P26350	Combo-Control	0.0818339	0.206642	0.396017	36	0.69443	0.816468	NA	0.814815	0	0.158372	Ptma	PTMA_MOUSE	Prothymosin alpha [Cleaved into: Prothymosin alpha, N-terminally processed; Thymosin alpha]	0.158372	0.0818339	0.0880611	P26350
P48410	Combo-Control	0.0817655	0.138907	0.588635	36	0.559781	0.717618	NA	0.0611111	0	0.251981	Abcd1 Ald Aldgh	ABCD1_MOUSE	ATP-binding cassette sub-family D member 1 (EC 7.6.2.4) (Adrenoleukodystrophy protein) (ALDP)	0.251981	0.0817655	0.144107	P48410
Q6ZPE2	Combo-Control	0.081178	0.13325	0.609215	36	0.546208	0.70555	NA	0.4375	0	0.262642	Sbf1 Kiaa3020 Mtmr5	MTMR5_MOUSE	Myotubularin-related protein 5 (Inactive phosphatidylinositol 3-phosphatase 5) (SET-binding factor 1) (Sbf1)	0.262642	0.081178	0.151472	Q6ZPE2
Q91YL3	Combo-Control	0.0807515	0.116869	0.690956	28	0.495282	0.664083	NA	0.4	0	0.305148	Uckl1 Urkl1	UCKL1_MOUSE	Uridine-cytidine kinase-like 1 (EC 2.7.1.48)	0.305148	0.0807515	0.177777	Q91YL3
P97429	Combo-Control	0.0804194	0.0704564	1.14141	36	0.261237	0.438088	NA	0.926718	0	0.582966	Anxa4 Anx4	ANXA4_MOUSE	Annexin A4 (Annexin IV) (Annexin-4)	0.582966	0.0804194	0.358439	P97429
Q8VCG3	Combo-Control	0.0802994	0.236769	0.339146	22	0.737716	0.848478	NA	0.45	0	0.132111	Wdr74	WDR74_MOUSE	WD repeat-containing protein 74	0.132111	0.0802994	0.0713594	Q8VCG3
E9PZQ0	Combo-Control	0.0796615	0.451983	0.176249	27	0.861414	0.919887	NA	0.858974	0	0.0647882	Ryr1	RYR1_MOUSE	Ryanodine receptor 1 (RYR-1) (RyR1) (Skeletal muscle calcium release channel) (Skeletal muscle ryanodine receptor) (Skeletal muscle-type ryanodine receptor) (Type 1 ryanodine receptor)	0.0647882	0.0796615	0.0362657	E9PZQ0
Q9DD18	Combo-Control	0.0792958	0.34361	0.230772	23	0.819532	0.897681	NA	0.3	0	0.086434	Dtd1 Hars2	DTD1_MOUSE	D-aminoacyl-tRNA deacylase 1 (DTD) (EC 3.1.1.96) (DNA-unwinding element-binding protein B) (DUE-B) (Gly-tRNA(Ala) deacylase)	0.086434	0.0792958	0.0468778	Q9DD18
Q9D8S9	Combo-Control	0.0791755	0.0983656	0.80491	36	0.426156	0.602529	NA	0.204167	0	0.370432	Bola1	BOLA1_MOUSE	BolA-like protein 1	0.370432	0.0791755	0.220022	Q9D8S9
O70362	Combo-Control	0.0786915	0.198619	0.396193	35	0.694367	0.816468	NA	0.1	0	0.158411	Gpld1	PHLD_MOUSE	Phosphatidylinositol-glycan-specific phospholipase D (PI-G PLD) (EC 3.1.4.50) (Glycoprotein phospholipase D) (Glycosyl-phosphatidylinositol-specific phospholipase D) (GPI-PLD) (GPI-specific phospholipase D)	0.158411	0.0786915	0.0880611	O70362
Q9Z0F7	Combo-Control	0.0785767	0.266139	0.295246	33	0.769655	0.86914	NA	0.241667	0	0.113704	Sncg Persyn	SYUG_MOUSE	Gamma-synuclein (Persyn)	0.113704	0.0785767	0.0609102	Q9Z0F7
Q8BFQ8	Combo-Control	0.0778037	0.0899162	0.865291	36	0.392609	0.571283	NA	0.246154	0	0.40604	Gatd1 Pddc1	GALD1_MOUSE	Glutamine amidotransferase-like class 1 domain-containing protein 1 (Parkinson disease 7 domain-containing protein 1)	0.40604	0.0778037	0.243149	Q8BFQ8
Q3TIX9	Combo-Control	0.0776859	0.168007	0.462397	32	0.646926	0.782002	NA	0.438889	0	0.189146	Usp39	SNUT2_MOUSE	U4/U6.U5 tri-snRNP-associated protein 2 (Inactive ubiquitin-specific peptidase 39)	0.189146	0.0776859	0.106792	Q3TIX9
P06728	Combo-Control	0.0771802	0.188564	0.409306	36	0.68474	0.8099	NA	0.891304	0	0.164474	Apoa4	APOA4_MOUSE	Apolipoprotein A-IV (Apo-AIV) (ApoA-IV) (Apolipoprotein A4)	0.164474	0.0771802	0.0915686	P06728
Q8VCF0	Combo-Control	0.0771172	0.0936068	0.823841	36	0.415455	0.59261	NA	0.133333	0	0.381476	Mavs Ips1 Visa	MAVS_MOUSE	Mitochondrial antiviral-signaling protein (MAVS) (CARD adapter inducing interferon beta) (Cardif) (Interferon beta promoter stimulator protein 1) (IPS-1) (Virus-induced-signaling adapter) (VISA)	0.381476	0.0771172	0.227231	Q8VCF0
Q99KV1	Combo-Control	0.0770071	0.0686092	1.1224	36	0.269122	0.447197	NA	0.736842	0	0.570051	Dnajb11	DJB11_MOUSE	DnaJ homolog subfamily B member 11 (APOBEC1-binding protein 2) (ABBP-2) (ER-associated DNAJ) (ER-associated Hsp40 co-chaperone) (Endoplasmic reticulum DNA J domain-containing protein 3) (ER-resident protein ERdj3) (ERdj3) (ERj3p)	0.570051	0.0770071	0.349501	Q99KV1
P10711	Combo-Control	0.0767942	0.102188	0.751498	36	0.457238	0.631254	NA	0.809804	0	0.339858	Tcea1 Tceat	TCEA1_MOUSE	Transcription elongation factor A protein 1 (Transcription elongation factor S-II protein 1) (Transcription elongation factor TFIIS.o)	0.339858	0.0767942	0.199796	P10711
Q01279	Combo-Control	0.0762573	0.10632	0.717244	36	0.477852	0.649603	NA	0.411765	0	0.320707	Egfr	EGFR_MOUSE	Epidermal growth factor receptor (EC 2.7.10.1)	0.320707	0.0762573	0.187352	Q01279
Q9CQ22	Combo-Control	0.0762396	0.0718447	1.06117	36	0.295679	0.47532	NA	0.36	0	0.52918	Lamtor1	LTOR1_MOUSE	Ragulator complex protein LAMTOR1 (Late endosomal/lysosomal adaptor and MAPK and MTOR activator 1) (Lipid raft adaptor protein p18)	0.52918	0.0762396	0.323014	Q9CQ22
Q9CQ62	Combo-Control	0.0759627	0.101796	0.746226	36	0.460376	0.634186	NA	0.8	0	0.336887	Decr1	DECR_MOUSE	2,4-dienoyl-CoA reductase, mitochondrial (EC 1.3.1.34) (2,4-dienoyl-CoA reductase [NADPH]) (4-enoyl-CoA reductase [NADPH])	0.336887	0.0759627	0.197784	Q9CQ62
Q9CQV8	Combo-Control	0.0759318	0.0998915	0.760143	36	0.452119	0.626189	NA	0.714286	0	0.344747	Ywhab	1433B_MOUSE	14-3-3 protein beta/alpha (Protein kinase C inhibitor protein 1) (KCIP-1) [Cleaved into: 14-3-3 protein beta/alpha, N-terminally processed]	0.344747	0.0759318	0.203295	Q9CQV8
P20060	Combo-Control	0.0759218	0.132589	0.572609	36	0.570468	0.724261	NA	0.828704	0	0.243768	Hexb	HEXB_MOUSE	Beta-hexosaminidase subunit beta (EC 3.2.1.52) (Beta-N-acetylhexosaminidase subunit beta) (Hexosaminidase subunit B) (N-acetyl-beta-glucosaminidase subunit beta)	0.243768	0.0759218	0.140105	P20060
P09103	Combo-Control	0.0752949	0.102395	0.735341	36	0.466896	0.640323	NA	0.97006	0	0.33078	P4hb Pdia1	PDIA1_MOUSE	Protein disulfide-isomerase (PDI) (EC 5.3.4.1) (Cellular thyroid hormone-binding protein) (Endoplasmic reticulum resident protein 59) (ER protein 59) (ERp59) (Prolyl 4-hydroxylase subunit beta) (p55)	0.33078	0.0752949	0.193601	P09103
O35855	Combo-Control	0.0752142	0.109241	0.68852	36	0.495539	0.664083	NA	0.792222	0	0.304922	Bcat2 Bcatm Eca40	BCAT2_MOUSE	Branched-chain-amino-acid aminotransferase, mitochondrial (BCAT(m)) (EC 2.6.1.42)	0.304922	0.0752142	0.177777	O35855
Q6NSR8	Combo-Control	0.0750068	0.1399	0.536147	36	0.595154	0.744929	NA	0.655357	0	0.22537	Npepl1	PEPL1_MOUSE	Probable aminopeptidase NPEPL1 (EC 3.4.11.-) (Aminopeptidase-like 1)	0.22537	0.0750068	0.127885	Q6NSR8
O70494	Combo-Control	0.0745288	0.178635	0.417214	31	0.679397	0.806486	NA	0.15	0	0.167876	Sp3	SP3_MOUSE	Transcription factor Sp3	0.167876	0.0745288	0.0934032	O70494
Q9D9V3	Combo-Control	0.0744169	0.25505	0.291774	36	0.772134	0.871101	NA	0.1	0	0.112307	Echdc1	ECHD1_MOUSE	Ethylmalonyl-CoA decarboxylase (EC 4.1.1.94) (Enoyl-CoA hydratase domain-containing protein 1) (Methylmalonyl-CoA decarboxylase) (MMCD)	0.112307	0.0744169	0.0599314	Q9D9V3
Q9R0L6	Combo-Control	0.0737201	0.448871	0.164234	36	0.870465	0.92547	NA	0.6325	0	0.0602486	Pcm1	PCM1_MOUSE	Pericentriolar material 1 protein (PCM-1) (mPCM-1)	0.0602486	0.0737201	0.0336377	Q9R0L6
P49138	Combo-Control	0.0729601	0.0901076	0.8097	35	0.423584	0.599674	NA	0.355556	0	0.373061	Mapkapk2 Rps6kc1	MAPK2_MOUSE	MAP kinase-activated protein kinase 2 (MAPK-activated protein kinase 2) (MAPKAP kinase 2) (MAPKAP-K2) (MAPKAPK-2) (MK-2) (MK2) (EC 2.7.11.1)	0.373061	0.0729601	0.222085	P49138
Q8VDL4	Combo-Control	0.0724064	0.0667903	1.08408	36	0.285535	0.46469	NA	0.792708	0	0.544341	Adpgk	ADPGK_MOUSE	ADP-dependent glucokinase (ADP-GK) (ADPGK) (EC 2.7.1.147)	0.544341	0.0724064	0.332837	Q8VDL4
Q6P8J7	Combo-Control	0.0722605	0.630052	0.11469	26	0.909572	0.949138	NA	0.803333	0	0.0411629	Ckmt2	KCRS_MOUSE	Creatine kinase S-type, mitochondrial (EC 2.7.3.2) (Basic-type mitochondrial creatine kinase) (Mib-CK) (Sarcomeric mitochondrial creatine kinase) (S-MtCK)	0.0411629	0.0722605	0.0226708	Q6P8J7
Q8K2C7	Combo-Control	0.0722228	0.0607819	1.18823	36	0.242523	0.418203	NA	0.591667	0	0.615247	Os9	OS9_MOUSE	Protein OS-9	0.615247	0.0722228	0.378613	Q8K2C7
O08749	Combo-Control	0.072047	0.053269	1.35251	36	0.184646	0.349949	NA	0.88764	0	0.733659	Dld	DLDH_MOUSE	Dihydrolipoyl dehydrogenase, mitochondrial (EC 1.8.1.4) (Dihydrolipoamide dehydrogenase)	0.733659	0.072047	0.455995	O08749
Q8VCT3	Combo-Control	0.0720308	0.0969961	0.742615	36	0.462533	0.635343	NA	0.825439	0	0.334857	Rnpep	AMPB_MOUSE	Aminopeptidase B (AP-B) (EC 3.4.11.6) (Arginine aminopeptidase) (Arginyl aminopeptidase) (Cytosol aminopeptidase IV)	0.334857	0.0720308	0.196992	Q8VCT3
Q9JJF9	Combo-Control	0.0719912	0.198261	0.363112	36	0.718644	0.833651	NA	0.155556	0	0.143486	Sppl2a Imp3 Psl2 MNCb-3763	SPP2A_MOUSE	Signal peptide peptidase-like 2A (SPP-like 2A) (SPPL2a) (EC 3.4.23.-) (Intramembrane protease 3) (IMP-3) (Presenilin-like protein 2)	0.143486	0.0719912	0.0790159	Q9JJF9
Q8BJF9	Combo-Control	0.0719226	0.106479	0.675459	36	0.5037	0.671085	NA	0	0	0.297828	Chmp2b	CHM2B_MOUSE	Charged multivesicular body protein 2b (Chromatin-modifying protein 2b) (CHMP2b)	0.297828	0.0719226	0.173223	Q8BJF9
Q60930	Combo-Control	0.071788	0.174402	0.411624	36	0.683055	0.808788	NA	0.84375	0	0.165544	Vdac2 Vdac6	VDAC2_MOUSE	Voltage-dependent anion-selective channel protein 2 (VDAC-2) (mVDAC2) (Outer mitochondrial membrane protein porin 2) (Voltage-dependent anion-selective channel protein 6) (VDAC-6) (mVDAC6)	0.165544	0.071788	0.0921652	Q60930
Q921X9	Combo-Control	0.0713124	0.0685787	1.03986	36	0.305338	0.485133	NA	0.511111	0	0.515219	Pdia5 Pdir	PDIA5_MOUSE	Protein disulfide-isomerase A5 (EC 5.3.4.1) (Protein disulfide isomerase-related protein)	0.515219	0.0713124	0.314139	Q921X9
Q91YX5	Combo-Control	0.0712359	0.176542	0.403506	36	0.688963	0.813122	NA	0.270833	0	0.161804	Lpgat1 Fam34a	LGAT1_MOUSE	Acyl-CoA:lysophosphatidylglycerol acyltransferase 1 (EC 2.3.1.-)	0.161804	0.0712359	0.0898441	Q91YX5
Q99J83	Combo-Control	0.0711447	0.0635494	1.11952	36	0.270334	0.448353	NA	0.25	0	0.5681	Atg5 Apg5l	ATG5_MOUSE	Autophagy protein 5 (APG5-like)	0.5681	0.0711447	0.34838	Q99J83
Q11136	Combo-Control	0.0707466	0.0892426	0.792745	36	0.43312	0.609202	NA	0.77	0	0.363392	Pepd Pep4	PEPD_MOUSE	Xaa-Pro dipeptidase (X-Pro dipeptidase) (EC 3.4.13.9) (Imidodipeptidase) (Peptidase 4) (Peptidase D) (Proline dipeptidase) (Prolidase)	0.363392	0.0707466	0.215238	Q11136
Q00993	Combo-Control	0.0705851	0.133615	0.528271	35	0.600645	0.74878	NA	0.541667	0	0.221382	Axl Ark Ufo	UFO_MOUSE	Tyrosine-protein kinase receptor UFO (EC 2.7.10.1) (Adhesion-related kinase)	0.221382	0.0705851	0.125646	Q00993
Q02357	Combo-Control	0.069897	0.375224	0.186281	30	0.853478	0.915465	NA	0.8	0	0.0688074	Ank1 Ank-1	ANK1_MOUSE	Ankyrin-1 (ANK-1) (Erythrocyte ankyrin)	0.0688074	0.069897	0.0383581	Q02357
O55201	Combo-Control	0.0698497	0.116049	0.601897	36	0.551015	0.709486	NA	0.7025	0	0.258837	Supt5h Supt5	SPT5H_MOUSE	Transcription elongation factor SPT5 (DRB sensitivity-inducing factor large subunit) (DSIF large subunit)	0.258837	0.0698497	0.149056	O55201
Q62280	Combo-Control	0.0698388	0.103496	0.674799	36	0.504115	0.671225	NA	0	0	0.297471	Ss18 Ssxt Syt	SSXT_MOUSE	Protein SSXT (Protein SYT) (Synovial sarcoma-associated Ss18-alpha)	0.297471	0.0698388	0.173132	Q62280
Q3UIA2	Combo-Control	0.0697549	0.0861071	0.810095	36	0.423209	0.599475	NA	0.502941	0	0.373446	Arhgap17	RHG17_MOUSE	Rho GTPase-activating protein 17 (Neuron-associated developmentally-regulated protein) (Nadrin) (Rho-type GTPase-activating protein 17)	0.373446	0.0697549	0.222229	Q3UIA2
P84228	Combo-Control	0.069594	0.161072	0.432069	36	0.668268	0.796711	NA	0.545455	0	0.175049	Hist1h3b H3-53 H3.2 H3b; Hist1h3c H3-143; Hist1h3d H3-B; Hist1h3e H3-F; Hist1h3f H3.2-221 H3f; Hist2h3b H3.2-616; Hist2h3c1 H3.2-615 Hist2h3ca1; Hist2h3c2 H3.2-614 Hist2h3ca2	H32_MOUSE	Histone H3.2	0.175049	0.069594	0.0986993	P84228
A2AIW0	Combo-Control	0.0694953	0.0705492	0.985061	33	0.331762	0.513551	NA	0.15	0	0.479174	Entr1 Sdccag3	ENTR1_MOUSE	Endosome-associated-trafficking regulator 1 (Serologically defined colon cancer antigen 3)	0.479174	0.0694953	0.289417	A2AIW0
Q8BGD8	Combo-Control	0.0693595	0.157095	0.441512	30	0.662009	0.792075	NA	0.1	0	0.179136	Coa6	COA6_MOUSE	Cytochrome c oxidase assembly factor 6 homolog	0.179136	0.0693595	0.101233	Q8BGD8
Q91VR8	Combo-Control	0.0693457	0.106696	0.649935	36	0.51986	0.683596	NA	0.05	0	0.284113	Brk1	BRK1_MOUSE	Protein BRICK1 (BRK1)	0.284113	0.0693457	0.165201	Q91VR8
Q61210	Combo-Control	0.0692844	0.0909883	0.761465	36	0.451339	0.625523	NA	0.843443	0	0.345497	Arhgef1 Lbcl2 Lsc	ARHG1_MOUSE	Rho guanine nucleotide exchange factor 1 (Lbc's second cousin) (Lymphoid blast crisis-like 2)	0.345497	0.0692844	0.203757	Q61210
P39054	Combo-Control	0.0691451	0.0683661	1.0114	36	0.318577	0.498652	NA	0.891848	0	0.496785	Dnm2 Dyn2	DYN2_MOUSE	Dynamin-2 (EC 3.6.5.5) (Dynamin UDNM)	0.496785	0.0691451	0.302202	P39054
O35206	Combo-Control	0.0688605	0.136931	0.502885	36	0.618108	0.760911	NA	0.494737	0	0.208935	Col15a1	COFA1_MOUSE	Collagen alpha-1(XV) chain [Cleaved into: Restin (Endostatin-XV)]	0.208935	0.0688605	0.118666	O35206
P12787	Combo-Control	0.0688486	0.123983	0.555306	36	0.58212	0.733845	NA	0.642857	0	0.234988	Cox5a	COX5A_MOUSE	Cytochrome c oxidase subunit 5A, mitochondrial (Cytochrome c oxidase polypeptide Va)	0.234988	0.0688486	0.134395	P12787
Q99KG3	Combo-Control	0.0688427	0.0735443	0.936072	36	0.355473	0.535554	NA	0.529167	0	0.449193	Rbm10 Kiaa0122	RBM10_MOUSE	RNA-binding protein 10 (RNA-binding motif protein 10)	0.449193	0.0688427	0.271197	Q99KG3
Q8K0F1	Combo-Control	0.0680548	0.309234	0.220075	9	0.830723	0.901889	NA	0.6	0	0.0805436	Tbc1d23	TBC23_MOUSE	TBC1 domain family member 23	0.0805436	0.0680548	0.044847	Q8K0F1
Q9Z0X1	Combo-Control	0.0680417	0.0674162	1.00928	36	0.319577	0.499677	NA	0.841525	0	0.495425	Aifm1 Aif Pdcd8	AIFM1_MOUSE	Apoptosis-inducing factor 1, mitochondrial (EC 1.6.99.-) (Programmed cell death protein 8)	0.495425	0.0680417	0.301311	Q9Z0X1
Q9Z2D0	Combo-Control	0.0678963	0.107409	0.632131	36	0.531296	0.694636	NA	0	0	0.274664	Mtmr9 Mtmr3	MTMR9_MOUSE	Myotubularin-related protein 9 (Inactive phosphatidylinositol 3-phosphatase 9)	0.274664	0.0678963	0.158243	Q9Z2D0
Q91XE8	Combo-Control	0.0678054	0.219109	0.30946	36	0.758756	0.862891	NA	0	0	0.119898	Tmem205	TM205_MOUSE	Transmembrane protein 205	0.119898	0.0678054	0.0640439	Q91XE8
G5E829	Combo-Control	0.0676941	0.0966929	0.700094	36	0.488368	0.658367	NA	0.753947	0	0.311253	Atp2b1	AT2B1_MOUSE	Plasma membrane calcium-transporting ATPase 1 (EC 7.2.2.10) (Plasma membrane calcium ATPase isoform 1) (PMCA1) (Plasma membrane calcium pump isoform 1)	0.311253	0.0676941	0.181532	G5E829
P50637	Combo-Control	0.0672392	0.484537	0.13877	17	0.891262	0.937466	NA	0.658333	0	0.0499944	Tspo Bzrp Mbr	TSPO_MOUSE	Translocator protein (Mitochondrial benzodiazepine receptor) (PKBS) (Peripheral-type benzodiazepine receptor) (PBR)	0.0499944	0.0672392	0.0280443	P50637
Q8VDS8	Combo-Control	0.0671571	0.132213	0.507948	36	0.614588	0.758971	NA	0.194444	0	0.211416	Stx18	STX18_MOUSE	Syntaxin-18	0.211416	0.0671571	0.119775	Q8VDS8
Q8C0L6	Combo-Control	0.0671421	0.101679	0.660333	36	0.513244	0.677151	NA	0.075	0	0.289677	Paox Pao	PAOX_MOUSE	Peroxisomal N(1)-acetyl-spermine/spermidine oxidase (EC 1.5.3.13) (Polyamine oxidase)	0.289677	0.0671421	0.169315	Q8C0L6
Q99N92	Combo-Control	0.0669917	0.141654	0.472924	34	0.639289	0.777316	NA	0.05	0	0.194302	Mrpl27	RM27_MOUSE	39S ribosomal protein L27, mitochondrial (L27mt) (MRP-L27)	0.194302	0.0669917	0.109402	Q99N92
O89103	Combo-Control	0.066899	0.388775	0.172076	16	0.865535	0.922473	NA	0.4	0	0.0627153	Cd93 Aa4 C1qr1 C1qrp Ly68	C1QR1_MOUSE	Complement component C1q receptor (C1q/MBL/SPA receptor) (C1qR(p)) (C1qRp) (Cell surface antigen AA4) (Complement component 1 q subcomponent receptor 1) (Lymphocyte antigen 68) (Ly-68) (CD antigen CD93)	0.0627153	0.066899	0.0350465	O89103
Q9CWL8	Combo-Control	0.0668566	0.315004	0.212241	14	0.834978	0.904097	NA	0.791667	0	0.0783248	Ctnnbl1	CTBL1_MOUSE	Beta-catenin-like protein 1 (Nuclear-associated protein) (NAP)	0.0783248	0.0668566	0.043785	Q9CWL8
Q8BU31	Combo-Control	0.0666508	0.0935982	0.712094	36	0.480996	0.652002	NA	0.105556	0	0.317858	Rap2c	RAP2C_MOUSE	Ras-related protein Rap-2c	0.317858	0.0666508	0.185751	Q8BU31
P27573	Combo-Control	0.0660789	0.4859	0.135993	6	0.896275	0.940233	NA	0.65	0	0.0475588	Mpz P0	MYP0_MOUSE	Myelin protein P0 (Myelin peripheral protein) (MPP) (Myelin protein zero)	0.0475588	0.0660789	0.0267644	P27573
Q8BJS4	Combo-Control	0.0657871	0.112012	0.587321	36	0.560654	0.717963	NA	0.835849	0	0.251305	Sun2 Unc84b	SUN2_MOUSE	SUN domain-containing protein 2 (Protein unc-84 homolog B) (Sad1/unc-84 protein-like 2)	0.251305	0.0657871	0.143898	Q8BJS4
P27808	Combo-Control	0.0656311	0.162776	0.4032	35	0.689254	0.813245	NA	0.358333	0	0.161621	Mgat1 Gnt1	MGAT1_MOUSE	Alpha-1,3-mannosyl-glycoprotein 2-beta-N-acetylglucosaminyltransferase (EC 2.4.1.101) (N-glycosyl-oligosaccharide-glycoprotein N-acetylglucosaminyltransferase I) (GNT-I) (GlcNAc-T I)	0.161621	0.0656311	0.0897787	P27808
Q8JZX4	Combo-Control	0.0654874	0.120916	0.541593	36	0.591435	0.741771	NA	0.04375	0	0.228093	Rbm17 Spf45	SPF45_MOUSE	Splicing factor 45 (45 kDa-splicing factor) (RNA-binding motif protein 17)	0.228093	0.0654874	0.12973	Q8JZX4
Q9CRD0	Combo-Control	0.0654546	0.170776	0.383278	35	0.703832	0.823064	NA	0.35	0	0.152531	Ociad1 Asrij	OCAD1_MOUSE	OCIA domain-containing protein 1	0.152531	0.0654546	0.0845663	Q9CRD0
Q91VN4	Combo-Control	0.065358	0.14889	0.438969	36	0.663308	0.793192	NA	0.222222	0	0.178285	Chchd6 Mic25	MIC25_MOUSE	MICOS complex subunit Mic25 (Coiled-coil-helix-coiled-coil-helix domain-containing protein 6)	0.178285	0.065358	0.100622	Q91VN4
P15508	Combo-Control	0.065272	0.163793	0.398504	36	0.692613	0.815656	NA	0.707407	0	0.159509	Sptb Spnb-1 Spnb1 Sptb1	SPTB1_MOUSE	Spectrin beta chain, erythrocytic (Beta-I spectrin)	0.159509	0.065272	0.0884928	P15508
Q8R1V4	Combo-Control	0.0652159	0.126617	0.515065	36	0.609656	0.755763	NA	0.368182	0	0.214915	Tmed4 Ers25	TMED4_MOUSE	Transmembrane emp24 domain-containing protein 4 (Endoplasmic reticulum stress-response protein 25) (ERS25) (p24 family protein alpha-3) (p24alpha3) (p26)	0.214915	0.0652159	0.121614	Q8R1V4
Q9CZ28	Combo-Control	0.0650868	0.117082	0.555907	36	0.581713	0.733669	NA	0.35	0	0.235291	Snf8 D11Moh34	SNF8_MOUSE	Vacuolar-sorting protein SNF8 (ESCRT-II complex subunit VPS22)	0.235291	0.0650868	0.1345	Q9CZ28
O70404	Combo-Control	0.064728	0.0972443	0.665623	36	0.509895	0.6754	NA	0.085	0	0.29252	Vamp8	VAMP8_MOUSE	Vesicle-associated membrane protein 8 (VAMP-8) (Endobrevin) (Edb)	0.29252	0.064728	0.170439	O70404
Q91VI7	Combo-Control	0.0646774	0.0839486	0.77044	36	0.446066	0.621691	NA	0.931522	0	0.350601	Rnh1 Rnh	RINI_MOUSE	Ribonuclease inhibitor (Ribonuclease/angiogenin inhibitor 1)	0.350601	0.0646774	0.206426	Q91VI7
P07724	Combo-Control	0.0646174	0.231038	0.279684	36	0.781321	0.876161	NA	0.984326	0	0.107171	Alb Alb-1 Alb1	ALBU_MOUSE	Serum albumin	0.107171	0.0646174	0.0574161	P07724
P08003	Combo-Control	0.0645743	0.109904	0.587553	36	0.5605	0.717963	NA	0.936538	0	0.251424	Pdia4 Cai Erp72	PDIA4_MOUSE	Protein disulfide-isomerase A4 (EC 5.3.4.1) (Endoplasmic reticulum resident protein 72) (ER protein 72) (ERp-72) (ERp72)	0.251424	0.0645743	0.143898	P08003
Q6PDM2	Combo-Control	0.0643763	0.13591	0.47367	36	0.638595	0.776983	NA	0.850746	0	0.194774	Srsf1 Sfrs1	SRSF1_MOUSE	Serine/arginine-rich splicing factor 1 (ASF/SF2) (Pre-mRNA-splicing factor SRp30a) (Splicing factor, arginine/serine-rich 1)	0.194774	0.0643763	0.109589	Q6PDM2
Q9JKW0	Combo-Control	0.0643387	0.147372	0.436572	36	0.665029	0.794376	NA	0	0	0.177159	Arl6ip1 Arl6ip	AR6P1_MOUSE	ADP-ribosylation factor-like protein 6-interacting protein 1 (ARL-6-interacting protein 1) (Aip-1) (Protein TBX2)	0.177159	0.0643387	0.0999739	Q9JKW0
Q60634	Combo-Control	0.0643296	0.0766735	0.839007	36	0.407002	0.58536	NA	0.816667	0	0.390403	Flot2 Esa1 M17s1	FLOT2_MOUSE	Flotillin-2 (Epidermal surface antigen) (ESA) (Membrane component chromosome 17 surface marker 1 homolog)	0.390403	0.0643296	0.232577	Q60634
Q9WVA2	Combo-Control	0.0636149	0.0839116	0.758119	36	0.453315	0.627644	NA	0.34	0	0.3436	Timm8a1 Ddp1 Tim8a Timm8a	TIM8A_MOUSE	Mitochondrial import inner membrane translocase subunit Tim8 A (Deafness dystonia protein 1 homolog)	0.3436	0.0636149	0.202287	Q9WVA2
Q3TC93	Combo-Control	0.0634024	0.104482	0.606824	36	0.547776	0.707028	NA	0.645652	0	0.261397	Hs1bp3	H1BP3_MOUSE	HCLS1-binding protein 3 (HS1-binding protein 3) (HSP1BP-3)	0.261397	0.0634024	0.150563	Q3TC93
Q8VCA8	Combo-Control	0.0632171	0.0866476	0.729588	36	0.470363	0.642779	NA	0.025	0	0.327567	Scrn2	SCRN2_MOUSE	Secernin-2	0.327567	0.0632171	0.191939	Q8VCA8
Q8BIJ7	Combo-Control	0.0632169	0.0803363	0.786904	36	0.436488	0.612548	NA	0.391667	0	0.360027	Rufy1 Rabip4	RUFY1_MOUSE	RUN and FYVE domain-containing protein 1 (Rab4-interacting protein)	0.360027	0.0632169	0.21286	Q8BIJ7
Q2TBE6	Combo-Control	0.0632013	0.134507	0.469872	36	0.641281	0.778375	NA	0.175	0	0.192952	Pi4k2a	P4K2A_MOUSE	Phosphatidylinositol 4-kinase type 2-alpha (EC 2.7.1.67) (Phosphatidylinositol 4-kinase type II-alpha)	0.192952	0.0632013	0.108811	Q2TBE6
Q9CYI4	Combo-Control	0.0631126	0.10033	0.629053	36	0.533286	0.695671	NA	0	0	0.27304	Luc7l	LUC7L_MOUSE	Putative RNA-binding protein Luc7-like 1	0.27304	0.0631126	0.157596	Q9CYI4
Q8C159	Combo-Control	0.0629468	0.104455	0.602622	36	0.550538	0.709328	NA	0	0	0.259213	Ttc22	TTC22_MOUSE	Tetratricopeptide repeat protein 22 (TPR repeat protein 22)	0.259213	0.0629468	0.149153	Q8C159
P97493	Combo-Control	0.0628209	0.164152	0.382698	36	0.704194	0.823266	NA	0.377273	0	0.152308	Txn2	THIOM_MOUSE	Thioredoxin, mitochondrial (MTRX) (Mt-Trx) (Thioredoxin-2)	0.152308	0.0628209	0.08446	P97493
Q08122	Combo-Control	0.0628201	0.426356	0.147342	6	0.887689	0.935067	NA	0.7	0	0.0517393	NA	NA	NA	0.0517393	0.0628201	0.0291575	Q08122;Q62440;Q62441;Q9WVB2
P40142	Combo-Control	0.062544	0.114713	0.545219	36	0.588965	0.74017	NA	0.966382	0	0.229911	Tkt	TKT_MOUSE	Transketolase (TK) (EC 2.2.1.1) (P68)	0.229911	0.062544	0.130669	P40142
Q8QZZ7	Combo-Control	0.0624023	0.0824896	0.756487	35	0.45442	0.628459	NA	0.435714	0	0.342543	Tprkb	TPRKB_MOUSE	EKC/KEOPS complex subunit Tprkb (PRPK-binding protein) (TP53RK-binding protein)	0.342543	0.0624023	0.201723	Q8QZZ7
P56212	Combo-Control	0.062184	0.137711	0.451553	35	0.654377	0.787719	NA	0.466667	0	0.184172	Arpp19	ARP19_MOUSE	cAMP-regulated phosphoprotein 19 (ARPP-19)	0.184172	0.062184	0.103628	P56212
P11672	Combo-Control	0.062112	0.190478	0.326085	36	0.746248	0.85381	NA	0.673077	0	0.127117	Lcn2	NGAL_MOUSE	Neutrophil gelatinase-associated lipocalin (NGAL) (Lipocalin-2) (Oncogene 24p3) (24p3) (SV-40-induced 24p3 protein) (Siderocalin LCN2) (p25)	0.127117	0.062112	0.0686386	P11672
P20029	Combo-Control	0.0620216	0.085672	0.723942	36	0.47378	0.646047	NA	0.971264	0	0.324423	Hspa5 Grp78	BIP_MOUSE	Endoplasmic reticulum chaperone BiP (EC 3.6.4.10) (78 kDa glucose-regulated protein) (GRP-78) (Binding-immunoglobulin protein) (BiP) (Heat shock protein 70 family protein 5) (HSP70 family protein 5) (Heat shock protein family A member 5) (Immunoglobulin heavy chain-binding protein)	0.324423	0.0620216	0.189736	P20029
Q8R2Y2	Combo-Control	0.0616297	0.137411	0.448505	36	0.656477	0.789245	NA	0.447059	0	0.182781	Mcam Muc18	MUC18_MOUSE	Cell surface glycoprotein MUC18 (Gicerin) (Melanoma cell adhesion molecule) (Melanoma-associated antigen MUC18) (CD antigen CD146)	0.182781	0.0616297	0.102788	Q8R2Y2
Q9QYA2	Combo-Control	0.0613601	0.283768	0.216233	26	0.830493	0.901889	NA	0.516667	0	0.0806638	Tomm40 Mom35 Tom40	TOM40_MOUSE	Mitochondrial import receptor subunit TOM40 homolog (Mitochondrial outer membrane protein of 35 kDa) (MOM35) (Protein Haymaker) (Translocase of outer membrane 40 kDa subunit homolog)	0.0806638	0.0613601	0.044847	Q9QYA2
Q6P5E4	Combo-Control	0.0613493	0.118122	0.519371	36	0.606681	0.753315	NA	0.935664	0	0.21704	Uggt1 Gt Ugcgl1 Uggt Ugt1 Ugtr	UGGG1_MOUSE	UDP-glucose:glycoprotein glucosyltransferase 1 (UGT1) (EC 2.4.1.-) (UDP--Glc:glycoprotein glucosyltransferase) (UDP-glucose ceramide glucosyltransferase-like 1)	0.21704	0.0613493	0.123023	Q6P5E4
Q9DBL1	Combo-Control	0.060953	0.0717554	0.849456	36	0.401241	0.579571	NA	0.658621	0	0.396594	Acadsb	ACDSB_MOUSE	Short/branched chain specific acyl-CoA dehydrogenase, mitochondrial (SBCAD) (EC 1.3.8.5) (2-methyl branched chain acyl-CoA dehydrogenase) (2-MEBCAD) (2-methylbutyryl-coenzyme A dehydrogenase) (2-methylbutyryl-CoA dehydrogenase)	0.396594	0.060953	0.236893	Q9DBL1
Q9CY64	Combo-Control	0.0608463	0.106632	0.570622	36	0.571801	0.725317	NA	0.833333	0	0.242755	Blvra	BIEA_MOUSE	Biliverdin reductase A (BVR A) (EC 1.3.1.24) (Biliverdin-IX alpha-reductase)	0.242755	0.0608463	0.139472	Q9CY64
Q9CPX6	Combo-Control	0.0606665	0.0907339	0.66862	36	0.508003	0.674128	NA	0.619048	0	0.294134	Atg3 Apg3l	ATG3_MOUSE	Ubiquitin-like-conjugating enzyme ATG3 (EC 2.3.2.-) (Autophagy-related protein 3) (APG3-like)	0.294134	0.0606665	0.171257	Q9CPX6
Q00262	Combo-Control	0.060364	0.151948	0.397267	33	0.693729	0.816306	NA	0.438889	0	0.15881	Stx2 Epim	STX2_MOUSE	Syntaxin-2 (Epimorphin)	0.15881	0.060364	0.0881469	Q00262
Q05920	Combo-Control	0.0601737	0.151196	0.397984	36	0.692992	0.815661	NA	0.874051	0	0.159272	Pc Pcx	PYC_MOUSE	Pyruvate carboxylase, mitochondrial (EC 6.4.1.1) (Pyruvic carboxylase) (PCB)	0.159272	0.0601737	0.0884905	Q05920
P70290	Combo-Control	0.0599757	0.0600877	0.998137	36	0.324875	0.505957	NA	0.783333	0	0.488284	Mpp1	EM55_MOUSE	55 kDa erythrocyte membrane protein (p55) (Membrane protein, palmitoylated 1)	0.488284	0.0599757	0.295886	P70290
Q99JY0	Combo-Control	0.059839	0.0890274	0.672141	36	0.505785	0.67262	NA	0.896907	0	0.296034	Hadhb	ECHB_MOUSE	Trifunctional enzyme subunit beta, mitochondrial (TP-beta) [Includes: 3-ketoacyl-CoA thiolase (EC 2.3.1.155) (EC 2.3.1.16) (Acetyl-CoA acyltransferase) (Beta-ketothiolase)]	0.296034	0.059839	0.17223	Q99JY0
Q3TAS6	Combo-Control	0.0594536	0.346588	0.17154	13	0.866441	0.922773	NA	0.55	0	0.0622611	Emc10 Hsm1 Inm02	EMC10_MOUSE	ER membrane protein complex subunit 10 (Hematopoietic signal peptide-containing membrane domain-containing protein 1)	0.0622611	0.0594536	0.0349053	Q3TAS6
P47757	Combo-Control	0.0588872	0.0665435	0.884942	36	0.38206	0.56235	NA	0.883721	0	0.417868	Capzb Cappb1	CAPZB_MOUSE	F-actin-capping protein subunit beta (CapZ beta)	0.417868	0.0588872	0.249994	P47757
P0C0S6	Combo-Control	0.0588223	0.100457	0.585549	36	0.561831	0.718726	NA	0.615385	0	0.250394	NA	NA	NA	0.250394	0.0588223	0.143437	P0C0S6;Q3THW5
Q504P2	Combo-Control	0.0587732	0.261674	0.224604	36	0.823557	0.899464	NA	0.0928571	0	0.0843063	Clec12a Micl	CL12A_MOUSE	C-type lectin domain family 12 member A (C-type lectin-like molecule 1) (CLL-1) (Myeloid inhibitory C-type lectin-like receptor) (MICL) (CD antigen CD371)	0.0843063	0.0587732	0.0460164	Q504P2
Q8CGN5	Combo-Control	0.058709	0.343609	0.17086	35	0.865318	0.922467	NA	0.77	0	0.0628244	Plin1 Peri Plin	PLIN1_MOUSE	Perilipin-1 (Lipid droplet-associated protein) (Perilipin A)	0.0628244	0.058709	0.035049	Q8CGN5
Q9CXS4	Combo-Control	0.0586104	0.113685	0.515552	36	0.609319	0.755688	NA	0.609091	0	0.215155	Cenpv Prr6	CENPV_MOUSE	Centromere protein V (CENP-V) (Proline-rich protein 6)	0.215155	0.0586104	0.121657	Q9CXS4
P55194	Combo-Control	0.0584354	0.0834926	0.699887	36	0.488496	0.658367	NA	0.373333	0	0.311139	Sh3bp1 3bp1	3BP1_MOUSE	SH3 domain-binding protein 1 (3BP-1)	0.311139	0.0584354	0.181532	P55194
Q9QZH3	Combo-Control	0.0583578	0.191249	0.30514	29	0.762439	0.865267	NA	0.15	0	0.117795	Ppie Cyp33	PPIE_MOUSE	Peptidyl-prolyl cis-trans isomerase E (PPIase E) (EC 5.2.1.8) (Cyclophilin E) (Cyclophilin-33) (Rotamase E)	0.117795	0.0583578	0.0628501	Q9QZH3
P60898	Combo-Control	0.058322	0.0717412	0.812949	36	0.421591	0.598023	NA	0.230769	0	0.375108	Polr2i	RPB9_MOUSE	DNA-directed RNA polymerase II subunit RPB9 (RNA polymerase II subunit B9) (DNA-directed RNA polymerase II subunit I) (RNA polymerase II 14.5 kDa subunit) (RPB14.5)	0.375108	0.058322	0.223282	P60898
O55102	Combo-Control	0.0581872	0.127565	0.456139	36	0.65103	0.784996	NA	0	0	0.186399	Bloc1s1 Gcn5l1	BL1S1_MOUSE	Biogenesis of lysosome-related organelles complex 1 subunit 1 (BLOC-1 subunit 1) (GCN5-like protein 1)	0.186399	0.0581872	0.105132	O55102
O70400	Combo-Control	0.0580719	0.0939379	0.618195	36	0.540339	0.700762	NA	0.878049	0	0.267334	Pdlim1 Clim1	PDLI1_MOUSE	PDZ and LIM domain protein 1 (C-terminal LIM domain protein 1) (Elfin) (LIM domain protein CLP-36)	0.267334	0.0580719	0.15443	O70400
P97390	Combo-Control	0.057774	0.0822447	0.702464	36	0.486907	0.657181	NA	0	0	0.312554	Vps45 Vps45a	VPS45_MOUSE	Vacuolar protein sorting-associated protein 45 (mVps45)	0.312554	0.057774	0.182315	P97390
Q8K0G5	Combo-Control	0.0576227	0.135483	0.425314	36	0.673139	0.800759	NA	0.3375	0	0.171895	Eipr1 Tssc1	EIPR1_MOUSE	EARP and GARP complex-interacting protein 1 (Endosome-associated recycling protein-interacting protein) (Golgi-associated retrograde protein-interacting protein) (Tumor-suppressing STF cDNA 1 protein) (Tumor-suppressing subchromosomal transferable fragment candidate gene 1 protein)	0.171895	0.0576227	0.0964981	Q8K0G5
Q61550	Combo-Control	0.0571243	0.105815	0.539853	36	0.592622	0.742831	NA	0	0	0.227222	Rad21 Hr21 Scc1	RAD21_MOUSE	Double-strand-break repair protein rad21 homolog (mHR21) (Pokeweed agglutinin-binding protein 29) (PW29) (SCC1 homolog) [Cleaved into: 64-kDa C-terminal product (64-kDa carboxy-terminal product)]	0.227222	0.0571243	0.12911	Q61550
Q9D1H8	Combo-Control	0.0571031	0.173169	0.329754	34	0.743609	0.852488	NA	0.458333	0	0.128656	Mrpl53	RM53_MOUSE	39S ribosomal protein L53, mitochondrial (L53mt) (MRP-L53)	0.128656	0.0571031	0.0693116	Q9D1H8
Q3TWL2	Combo-Control	0.0557625	0.124924	0.446372	36	0.658002	0.789893	NA	0	0	0.181773	Pip4p1 Tmem55b	PP4P1_MOUSE	Type 1 phosphatidylinositol 4,5-bisphosphate 4-phosphatase (Type 1 PtdIns-4,5-P2 4-Ptase) (EC 3.1.3.78) (PtdIns-4,5-P2 4-Ptase I) (Transmembrane protein 55B)	0.181773	0.0557625	0.102432	Q3TWL2
Q8VED2	Combo-Control	0.0557356	0.170344	0.327194	31	0.74572	0.853721	NA	0.166667	0	0.127424	Bloc1s4 Cno	BL1S4_MOUSE	Biogenesis of lysosome-related organelles complex 1 subunit 4 (BLOC-1 subunit 4) (Protein cappuccino homolog)	0.127424	0.0557356	0.068684	Q8VED2
Q8K4L3	Combo-Control	0.0556808	0.0913373	0.609617	36	0.545945	0.705503	NA	0.84375	0	0.262851	Svil	SVIL_MOUSE	Supervillin (Archvillin) (p205/p250)	0.262851	0.0556808	0.151501	Q8K4L3
Q8VI94	Combo-Control	0.0552857	0.144233	0.383309	36	0.703745	0.823064	NA	0.413333	0	0.152585	Oasl1 oasl9	OASL1_MOUSE	2'-5'-oligoadenylate synthase-like protein 1 (2',5'-oligoadenylate synthetase-like 9)	0.152585	0.0552857	0.0845663	Q8VI94
Q80V26	Combo-Control	0.0551263	0.262938	0.209655	9	0.838606	0.906086	NA	0.733333	0	0.0764422	Impad1 Impa3	IMPA3_MOUSE	Golgi-resident adenosine 3',5'-bisphosphate 3'-phosphatase (Golgi-resident PAP phosphatase) (gPAPP) (EC 3.1.3.7) (Inositol monophosphatase domain-containing protein 1) (Myo-inositol monophosphatase A3) (Phosphoadenosine phosphate 3'-nucleotidase)	0.0764422	0.0551263	0.0428306	Q80V26
Q6ZWQ0	Combo-Control	0.0551231	0.15246	0.361557	29	0.720304	0.834461	NA	0.616667	0	0.142484	Syne2	SYNE2_MOUSE	Nesprin-2 (KASH domain-containing protein 2) (KASH2) (Nuclear envelope spectrin repeat protein 2) (Nucleus and actin connecting element protein) (Protein NUANCE) (Synaptic nuclear envelope protein 2) (Syne-2)	0.142484	0.0551231	0.078594	Q6ZWQ0
A2AB59	Combo-Control	0.0549449	0.183445	0.299518	33	0.766424	0.867747	NA	0.4	0	0.115531	Arhgap27 Camgap1	RHG27_MOUSE	Rho GTPase-activating protein 27 (CIN85-associated multi-domain-containing Rho GTPase-activating protein 1) (Rho-type GTPase-activating protein 27)	0.115531	0.0549449	0.0616067	A2AB59
P35285	Combo-Control	0.0548702	0.540576	0.101503	14	0.92059	0.956498	NA	0.6	0	0.0359336	Rab22a Rab22	RB22A_MOUSE	Ras-related protein Rab-22A (Rab-22) (Rab-14)	0.0359336	0.0548702	0.0193161	P35285
Q3UFY8	Combo-Control	0.054805	1.34022	0.0408925	2	0.971097	0.985193	NA	0.9	0	0.0127375	Trmt10c Mrpp1 Rg9mtd1	TM10C_MOUSE	tRNA methyltransferase 10 homolog C (Mitochondrial ribonuclease P protein 1) (Mitochondrial RNase P protein 1) (RNA (guanine-9-)-methyltransferase domain-containing protein 1) (mRNA methyladenosine-N(1)-methyltransferase) (EC 2.1.1.-) (tRNA (adenine(9)-N(1))-methyltransferase) (EC 2.1.1.218) (tRNA (guanine(9)-N(1))-methyltransferase) (EC 2.1.1.221)	0.0127375	0.054805	0.00647871	Q3UFY8
P68033	Combo-Control	0.0547677	0.0868632	0.630505	36	0.532347	0.695173	NA	0.970588	0	0.273806	Actc1 Actc	ACTC_MOUSE	Actin, alpha cardiac muscle 1 (Alpha-cardiac actin) [Cleaved into: Actin, alpha cardiac muscle 1, intermediate form]	0.273806	0.0547677	0.157907	P68033
Q3SXD3	Combo-Control	0.0544353	0.137676	0.395388	35	0.694956	0.816668	NA	0.05	0	0.158042	Hddc2	HDDC2_MOUSE	HD domain-containing protein 2	0.158042	0.0544353	0.0879547	Q3SXD3
Q8C1D8	Combo-Control	0.0543455	0.133573	0.406859	30	0.687	0.811688	NA	0.133333	0	0.163043	Iws1 Iws1l	IWS1_MOUSE	Protein IWS1 homolog (IWS1-like protein)	0.163043	0.0543455	0.090611	Q8C1D8
Q9D6N5	Combo-Control	0.0542161	0.102828	0.527253	36	0.601252	0.749322	NA	0.0285714	0	0.220943	Drap1	NC2A_MOUSE	Dr1-associated corepressor (Dr1-associated protein 1) (Negative cofactor 2-alpha) (NC2-alpha)	0.220943	0.0542161	0.125332	Q9D6N5
Q921H9	Combo-Control	0.0542002	0.121251	0.44701	36	0.657546	0.789783	NA	0.395833	0	0.182074	Coa7 Selrc1	COA7_MOUSE	Cytochrome c oxidase assembly factor 7 (Beta-lactamase hcp-like protein) (Respiratory chain assembly factor 1) (Sel1 repeat-containing protein 1)	0.182074	0.0542002	0.102492	Q921H9
Q9DCD0	Combo-Control	0.0537409	0.110701	0.485461	36	0.630291	0.770474	NA	0.93865	0	0.200459	Pgd	6PGD_MOUSE	6-phosphogluconate dehydrogenase, decarboxylating (EC 1.1.1.44)	0.200459	0.0537409	0.113242	Q9DCD0
Q9CY45	Combo-Control	0.0536374	0.170961	0.313741	10	0.760165	0.863589	NA	0.55	0	0.119092	Eef1akmt1 N6amt2	EFMT1_MOUSE	EEF1A lysine methyltransferase 1 (EC 2.1.1.-) (N(6)-adenine-specific DNA methyltransferase 2) (Protein-lysine N-methyltransferase N6amt2)	0.119092	0.0536374	0.0636931	Q9CY45
Q8VEK0	Combo-Control	0.0535322	1.51872	0.0352484	7	0.972866	0.985347	NA	0.9	0	0.0119471	Tmem30a Cdc50a D9Wsu20e	CC50A_MOUSE	Cell cycle control protein 50A (P4-ATPase flippase complex beta subunit TMEM30A) (Transmembrane protein 30A)	0.0119471	0.0535322	0.00641073	Q8VEK0
O09174	Combo-Control	0.0534628	0.142974	0.373933	36	0.710648	0.827247	NA	0	0	0.148346	Amacr Macr1	AMACR_MOUSE	Alpha-methylacyl-CoA racemase (EC 5.1.99.4) (2-methylacyl-CoA racemase)	0.148346	0.0534628	0.0823646	O09174
Q9CRC0	Combo-Control	0.053327	0.144127	0.369999	36	0.713551	0.830182	NA	0	0	0.146575	Vkorc1	VKOR1_MOUSE	Vitamin K epoxide reductase complex subunit 1 (EC 1.17.4.4) (Vitamin K1 2,3-epoxide reductase subunit 1)	0.146575	0.053327	0.0808267	Q9CRC0
Q8R3Q6	Combo-Control	0.0531632	0.160224	0.331805	36	0.741961	0.851372	NA	0.505882	0	0.129619	Ccdc58	CCD58_MOUSE	Coiled-coil domain-containing protein 58	0.129619	0.0531632	0.0698804	Q8R3Q6
Q91W86	Combo-Control	0.0530455	0.10806	0.490888	34	0.626659	0.767331	NA	0.15	0	0.202968	Vps11	VPS11_MOUSE	Vacuolar protein sorting-associated protein 11 homolog	0.202968	0.0530455	0.115017	Q91W86
Q9Z266	Combo-Control	0.0529307	0.103237	0.512713	36	0.611284	0.756344	NA	0.05	0	0.213757	Snapin Bloc1s7 Snap25bp Snapap	SNAPN_MOUSE	SNARE-associated protein Snapin (Biogenesis of lysosome-related organelles complex 1 subunit 7) (BLOC-1 subunit 7) (Synaptosomal-associated protein 25-binding protein) (SNAP-associated protein)	0.213757	0.0529307	0.12128	Q9Z266
Q91WN1	Combo-Control	0.0526477	0.115398	0.456227	36	0.650967	0.784996	NA	0.175	0	0.186441	Dnajc9	DNJC9_MOUSE	DnaJ homolog subfamily C member 9	0.186441	0.0526477	0.105132	Q91WN1
Q9CRB9	Combo-Control	0.052321	0.106987	0.48904	36	0.62778	0.768053	NA	0.677419	0	0.202193	Chchd3 Mic19	MIC19_MOUSE	MICOS complex subunit Mic19 (Coiled-coil-helix-coiled-coil-helix domain-containing protein 3)	0.202193	0.052321	0.114609	Q9CRB9
P62482	Combo-Control	0.0521663	0.0800757	0.651463	36	0.518885	0.68252	NA	0.443333	0	0.284929	Kcnab2 Ckbeta2 I2rf5 Kcnb3	KCAB2_MOUSE	Voltage-gated potassium channel subunit beta-2 (EC 1.1.1.-) (K(+) channel subunit beta-2) (Kv-beta-2) (Neuroimmune protein F5)	0.284929	0.0521663	0.165884	P62482
P48759	Combo-Control	0.0521538	0.172942	0.301568	25	0.765475	0.867284	NA	0.566667	0	0.116069	Ptx3 Tsg14	PTX3_MOUSE	Pentraxin-related protein PTX3 (Pentaxin-related protein PTX3) (Tumor necrosis factor-inducible gene 14 protein) (TSG-14)	0.116069	0.0521538	0.0618389	P48759
P56480	Combo-Control	0.0521202	0.0499901	1.04261	36	0.304081	0.483987	NA	0.957983	0	0.517011	Atp5f1b Atp5b	ATPB_MOUSE	ATP synthase subunit beta, mitochondrial (EC 7.1.2.2) (ATP synthase F1 subunit beta)	0.517011	0.0521202	0.315166	P56480
Q61334	Combo-Control	0.0517594	0.151915	0.340713	32	0.735547	0.847147	NA	0.05	0	0.13339	Bcap29 Bap29	BAP29_MOUSE	B-cell receptor-associated protein 29 (BCR-associated protein 29) (Bap29)	0.13339	0.0517594	0.0720414	Q61334
Q9CQR6	Combo-Control	0.0517429	0.0622353	0.831407	36	0.411225	0.58987	NA	0.714286	0	0.385921	Ppp6c	PPP6_MOUSE	Serine/threonine-protein phosphatase 6 catalytic subunit (PP6C) (EC 3.1.3.16)	0.385921	0.0517429	0.229244	Q9CQR6
Q9WVA4	Combo-Control	0.0516654	0.128479	0.402132	36	0.689964	0.813641	NA	0.876543	0	0.161173	Tagln2 Kiaa0120	TAGL2_MOUSE	Transgelin-2 (SM22-beta)	0.161173	0.0516654	0.0895673	Q9WVA4
P11859	Combo-Control	0.0515883	0.264558	0.194998	36	0.846491	0.911122	NA	0.155556	0	0.0723776	Agt Serpina8	ANGT_MOUSE	Angiotensinogen (Serpin A8) [Cleaved into: Angiotensin-1 (Angiotensin 1-10) (Angiotensin I) (Ang I); Angiotensin-2 (Angiotensin 1-8) (Angiotensin II) (Ang II); Angiotensin-3 (Angiotensin 2-8) (Angiotensin III) (Ang III) (Des-Asp[1]-angiotensin II); Angiotensin-4 (Angiotensin 3-8) (Angiotensin IV) (Ang IV); Angiotensin 1-9; Angiotensin 1-7; Angiotensin 1-5; Angiotensin 1-4]	0.0723776	0.0515883	0.0404237	P11859
P10518	Combo-Control	0.0515729	0.117733	0.438051	36	0.663967	0.793762	NA	0.545	0	0.177854	Alad Lv	HEM2_MOUSE	Delta-aminolevulinic acid dehydratase (ALADH) (EC 4.2.1.24) (Porphobilinogen synthase)	0.177854	0.0515729	0.10031	P10518
P11680	Combo-Control	0.0514617	0.12869	0.399889	36	0.691601	0.815128	NA	0.651852	0	0.160144	Cfp Pfc	PROP_MOUSE	Properdin (Complement factor P)	0.160144	0.0514617	0.0887742	P11680
Q9Z0F8	Combo-Control	0.0513855	0.0890741	0.576885	36	0.567607	0.722742	NA	0.05	0	0.245952	Adam17 Tace	ADA17_MOUSE	Disintegrin and metalloproteinase domain-containing protein 17 (ADAM 17) (EC 3.4.24.86) (TNF-alpha convertase) (TNF-alpha-converting enzyme) (CD antigen CD156b)	0.245952	0.0513855	0.141017	Q9Z0F8
Q3UJD6	Combo-Control	0.0512445	0.129667	0.395201	36	0.695026	0.816668	NA	0.266667	0	0.157999	Usp19 Kiaa0891	UBP19_MOUSE	Ubiquitin carboxyl-terminal hydrolase 19 (EC 3.4.19.12) (Deubiquitinating enzyme 19) (Ubiquitin thioesterase 19) (Ubiquitin-specific-processing protease 19)	0.157999	0.0512445	0.0879547	Q3UJD6
Q6PIU9	Combo-Control	0.0511433	0.160177	0.319292	36	0.751351	0.857054	NA	0.366667	0	0.124157	NA	YJ005_MOUSE	Uncharacterized protein FLJ45252 homolog	0.124157	0.0511433	0.0669917	Q6PIU9
Q9JJY4	Combo-Control	0.051111	0.196224	0.260472	8	0.801079	0.887926	NA	0.65	0	0.0963249	Ddx20 Dp103 Gemin3	DDX20_MOUSE	Probable ATP-dependent RNA helicase DDX20 (EC 3.6.4.13) (Component of gems 3) (DEAD box protein 20) (DEAD box protein DP 103) (Gemin-3) (Regulator of steroidogenic factor 1) (ROSF-1)	0.0963249	0.051111	0.0516232	Q9JJY4
Q9R1P3	Combo-Control	0.0505685	0.136863	0.369483	36	0.713932	0.830403	NA	0.810577	0	0.146343	Psmb2	PSB2_MOUSE	Proteasome subunit beta type-2 (EC 3.4.25.1) (Macropain subunit C7-I) (Multicatalytic endopeptidase complex subunit C7-I) (Proteasome component C7-I)	0.146343	0.0505685	0.0807112	Q9R1P3
P57746	Combo-Control	0.0505469	0.107367	0.470785	36	0.640634	0.777862	NA	0.406667	0	0.19339	Atp6v1d Atp6m Vatd	VATD_MOUSE	V-type proton ATPase subunit D (V-ATPase subunit D) (V-ATPase 28 kDa accessory protein) (Vacuolar proton pump subunit D)	0.19339	0.0505469	0.109098	P57746
Q64521	Combo-Control	0.0504648	0.0930672	0.54224	36	0.590994	0.741432	NA	0.888764	0	0.228417	Gpd2 Gdm1	GPDM_MOUSE	Glycerol-3-phosphate dehydrogenase, mitochondrial (GPD-M) (GPDH-M) (EC 1.1.5.3) (Protein TISP38)	0.228417	0.0504648	0.129929	Q64521
Q62465	Combo-Control	0.0504237	0.0786207	0.641354	36	0.525355	0.688943	NA	0.873418	0	0.279547	Vat1 Vat-1	VAT1_MOUSE	Synaptic vesicle membrane protein VAT-1 homolog (EC 1.-.-.-)	0.279547	0.0504237	0.161817	Q62465
Q9Z2U1	Combo-Control	0.0500642	0.116186	0.430897	36	0.669112	0.797279	NA	0.8	0	0.174501	Psma5	PSA5_MOUSE	Proteasome subunit alpha type-5 (EC 3.4.25.1) (Macropain zeta chain) (Multicatalytic endopeptidase complex zeta chain) (Proteasome zeta chain)	0.174501	0.0500642	0.0983896	Q9Z2U1
Q9D2V8	Combo-Control	0.0500497	0.222646	0.224795	36	0.82341	0.899464	NA	0.29	0	0.0843838	Mfsd10 Tetran	MFS10_MOUSE	Major facilitator superfamily domain-containing protein 10 (Tetracycline transporter-like protein)	0.0843838	0.0500497	0.0460164	Q9D2V8
Q9CR27	Combo-Control	0.0494468	0.13087	0.377832	33	0.707975	0.825464	NA	0.1	0	0.149982	Washc3 Ccdc53	WASC3_MOUSE	WASH complex subunit 3 (Coiled-coil domain-containing protein 53)	0.149982	0.0494468	0.083302	Q9CR27
Q99LC5	Combo-Control	0.049326	0.0719033	0.686004	36	0.497105	0.665361	NA	0.868421	0	0.303552	Etfa	ETFA_MOUSE	Electron transfer flavoprotein subunit alpha, mitochondrial (Alpha-ETF)	0.303552	0.049326	0.176943	Q99LC5
Q80W00	Combo-Control	0.0486078	0.235052	0.206796	12	0.839637	0.906291	NA	0.6	0	0.0759085	Ppp1r10 Cat53 Pnuts	PP1RA_MOUSE	Serine/threonine-protein phosphatase 1 regulatory subunit 10 (MHC class I region proline-rich protein CAT53)	0.0759085	0.0486078	0.0427323	Q80W00
Q8BH58	Combo-Control	0.0484707	0.0747112	0.648774	36	0.520602	0.684156	NA	0.316667	0	0.283494	Tiprl	TIPRL_MOUSE	TIP41-like protein	0.283494	0.0484707	0.164845	Q8BH58
Q9DBR3	Combo-Control	0.0481559	0.0938145	0.51331	36	0.610871	0.756344	NA	0	0	0.214051	Armc8	ARMC8_MOUSE	Armadillo repeat-containing protein 8	0.214051	0.0481559	0.12128	Q9DBR3
O89110	Combo-Control	0.0480875	0.0773945	0.62133	36	0.538298	0.699173	NA	0.75	0	0.268978	Casp8	CASP8_MOUSE	Caspase-8 (CASP-8) (EC 3.4.22.61) [Cleaved into: Caspase-8 subunit p18; Caspase-8 subunit p10]	0.268978	0.0480875	0.155415	O89110
P97449	Combo-Control	0.0471863	0.0977768	0.482592	36	0.632307	0.772069	NA	0.873418	0	0.199072	Anpep Lap-1 Lap1	AMPN_MOUSE	Aminopeptidase N (AP-N) (mAPN) (EC 3.4.11.2) (Alanyl aminopeptidase) (Aminopeptidase M) (AP-M) (Membrane protein p161) (Microsomal aminopeptidase) (CD antigen CD13)	0.199072	0.0471863	0.112344	P97449
P70452	Combo-Control	0.0470518	0.0805205	0.584346	36	0.562632	0.718726	NA	0.480556	0	0.249776	Stx4 Stx4a	STX4_MOUSE	Syntaxin-4	0.249776	0.0470518	0.143437	P70452
Q8JZR0	Combo-Control	0.0470312	0.139267	0.337706	36	0.737546	0.848478	NA	0.790698	0	0.132211	Acsl5 Facl5	ACSL5_MOUSE	Long-chain-fatty-acid--CoA ligase 5 (EC 6.2.1.3) (Arachidonate--CoA ligase) (EC 6.2.1.15) (Long-chain acyl-CoA synthetase 5) (LACS 5)	0.132211	0.0470312	0.0713594	Q8JZR0
Q8VDT9	Combo-Control	0.0470064	0.116029	0.405128	35	0.687849	0.81225	NA	0	0	0.162507	Mrpl50	RM50_MOUSE	39S ribosomal protein L50, mitochondrial (L50mt) (MRP-L50)	0.162507	0.0470064	0.0903105	Q8VDT9
P51881	Combo-Control	0.0469609	0.100336	0.468038	36	0.642579	0.778636	NA	0.925373	0	0.192074	Slc25a5 Ant2	ADT2_MOUSE	ADP/ATP translocase 2 (ADP,ATP carrier protein 2) (Adenine nucleotide translocator 2) (ANT 2) (Solute carrier family 25 member 5) [Cleaved into: ADP/ATP translocase 2, N-terminally processed]	0.192074	0.0469609	0.108665	P51881
Q61543	Combo-Control	0.0468141	0.0732901	0.638751	36	0.527028	0.690512	NA	0.944595	0	0.278166	Glg1 Esl1 Mg160 Selel	GSLG1_MOUSE	Golgi apparatus protein 1 (E-selectin ligand 1) (ESL-1) (Selel) (Golgi sialoglycoprotein MG-160)	0.278166	0.0468141	0.160829	Q61543
Q9CQH3	Combo-Control	0.0466622	0.150482	0.310086	36	0.758284	0.86258	NA	0.515	0	0.120168	Ndufb5	NDUB5_MOUSE	NADH dehydrogenase [ubiquinone] 1 beta subcomplex subunit 5, mitochondrial (Complex I-SGDH) (CI-SGDH) (NADH-ubiquinone oxidoreductase SGDH subunit)	0.120168	0.0466622	0.0642006	Q9CQH3
Q80U87	Combo-Control	0.0463855	0.0736019	0.630222	36	0.53253	0.695203	NA	0.166667	0	0.273656	Usp8 Kiaa0055 Ubpy	UBP8_MOUSE	Ubiquitin carboxyl-terminal hydrolase 8 (EC 3.4.19.12) (Deubiquitinating enzyme 8) (Ubiquitin isopeptidase Y) (mUBPy) (Ubiquitin thioesterase 8) (Ubiquitin-specific-processing protease 8)	0.273656	0.0463855	0.157889	Q80U87
P36552	Combo-Control	0.046352	0.147585	0.31407	36	0.755281	0.860291	NA	0.522222	0	0.121892	Cpox Cpo	HEM6_MOUSE	Oxygen-dependent coproporphyrinogen-III oxidase, mitochondrial (COX) (Coprogen oxidase) (Coproporphyrinogenase) (EC 1.3.3.3)	0.121892	0.046352	0.0653547	P36552
P56812	Combo-Control	0.04612	0.0985349	0.468057	36	0.642565	0.778636	NA	0.666667	0	0.192083	Pdcd5 Tfar19	PDCD5_MOUSE	Programmed cell death protein 5 (TF-1 cell apoptosis-related protein 19) (Protein TFAR19)	0.192083	0.04612	0.108665	P56812
Q9DCX2	Combo-Control	0.045892	0.103068	0.445262	36	0.658797	0.79041	NA	0.869079	0	0.181249	Atp5pd Atp5h	ATP5H_MOUSE	ATP synthase subunit d, mitochondrial (ATPase subunit d) (ATP synthase peripheral stalk subunit d)	0.181249	0.045892	0.102147	Q9DCX2
Q9CXI0	Combo-Control	0.0457384	0.189796	0.240987	12	0.813633	0.894666	NA	0.55	0	0.0895713	Coq5 D5Ertd33e	COQ5_MOUSE	2-methoxy-6-polyprenyl-1,4-benzoquinol methylase, mitochondrial (EC 2.1.1.201) (Ubiquinone biosynthesis methyltransferase COQ5)	0.0895713	0.0457384	0.048339	Q9CXI0
P25799	Combo-Control	0.0456193	0.100489	0.453972	36	0.652574	0.786097	NA	0.756061	0	0.18537	Nfkb1	NFKB1_MOUSE	Nuclear factor NF-kappa-B p105 subunit (DNA-binding factor KBF1) (EBP-1) (NF-kappa-B1 p84/NF-kappa-B1 p98) (Nuclear factor of kappa light polypeptide gene enhancer in B-cells 1) [Cleaved into: Nuclear factor NF-kappa-B p50 subunit]	0.18537	0.0456193	0.104524	P25799
Q9ERB0	Combo-Control	0.0454596	0.121022	0.375631	36	0.709395	0.826011	NA	0.409375	0	0.149112	Snap29	SNP29_MOUSE	Synaptosomal-associated protein 29 (SNAP-29) (Golgi SNARE of 32 kDa) (Gs32) (Soluble 29 kDa NSF attachment protein) (Vesicle-membrane fusion protein SNAP-29)	0.149112	0.0454596	0.0830142	Q9ERB0
Q9Z2Y8	Combo-Control	0.0454484	0.109464	0.41519	36	0.680467	0.807044	NA	0.0833333	0	0.167193	Plpbp Prosc	PLPHP_MOUSE	Pyridoxal phosphate homeostasis protein (PLP homeostasis protein) (Proline synthase co-transcribed bacterial homolog protein) (Pyridoxal phosphate-binding protein)	0.167193	0.0454484	0.0931028	Q9Z2Y8
Q8VE70	Combo-Control	0.0453755	0.159047	0.285296	36	0.777052	0.872969	NA	0.225	0	0.10955	Pdcd10 Tfar15	PDC10_MOUSE	Programmed cell death protein 10 (TF-1 cell apoptosis-related protein 15)	0.10955	0.0453755	0.0590012	Q8VE70
Q8R0H9	Combo-Control	0.0447286	0.0913938	0.489406	36	0.627523	0.767956	NA	0.37	0	0.20237	Gga1	GGA1_MOUSE	ADP-ribosylation factor-binding protein GGA1 (Gamma-adaptin-related protein 1) (Golgi-localized, gamma ear-containing, ARF-binding protein 1)	0.20237	0.0447286	0.114664	Q8R0H9
Q91VJ5	Combo-Control	0.0445216	0.186726	0.238433	36	0.812898	0.894249	NA	0.533333	0	0.0899641	Pqbp1 Npw38	PQBP1_MOUSE	Polyglutamine-binding protein 1 (PQBP-1) (38 kDa nuclear protein containing a WW domain) (Npw38) (Polyglutamine tract-binding protein 1)	0.0899641	0.0445216	0.0485414	Q91VJ5
O35459	Combo-Control	0.0444892	0.0968525	0.45935	36	0.648745	0.783706	NA	0.695	0	0.187926	Ech1	ECH1_MOUSE	Delta(3,5)-Delta(2,4)-dienoyl-CoA isomerase, mitochondrial (EC 5.3.3.-)	0.187926	0.0444892	0.105847	O35459
Q9EST5	Combo-Control	0.0444255	0.0773225	0.574548	36	0.56917	0.723519	NA	0.724242	0	0.244758	Anp32b Pal31	AN32B_MOUSE	Acidic leucine-rich nuclear phosphoprotein 32 family member B (Proliferation-related acidic leucine-rich protein PAL31)	0.244758	0.0444255	0.14055	Q9EST5
Q9QXG4	Combo-Control	0.0439482	0.616753	0.0712573	13	0.944278	0.972037	NA	0.822222	0	0.0249003	Acss2 Acas2 Acecs1	ACSA_MOUSE	Acetyl-coenzyme A synthetase, cytoplasmic (EC 6.2.1.1) (Acetate--CoA ligase) (Acetyl-CoA synthetase) (ACS) (AceCS) (Acetyl-CoA synthetase 1) (AceCS1) (Acyl-CoA synthetase short-chain family member 2) (Acyl-activating enzyme) (Propionate--CoA ligase) (EC 6.2.1.17)	0.0249003	0.0439482	0.0123171	Q9QXG4
P07214	Combo-Control	0.0438616	0.0888351	0.493741	36	0.624488	0.766185	NA	0.615385	0	0.204476	Sparc	SPRC_MOUSE	SPARC (Basement-membrane protein 40) (BM-40) (Osteonectin) (ON) (Secreted protein acidic and rich in cysteine)	0.204476	0.0438616	0.115667	P07214
Q8C4Q6	Combo-Control	0.0437244	0.100584	0.434706	36	0.666371	0.794971	NA	0.4625	0	0.176284	Aida	AIDA_MOUSE	Axin interactor, dorsalization-associated protein (Axin interaction partner and dorsalization antagonist)	0.176284	0.0437244	0.0996488	Q8C4Q6
Q8QZT1	Combo-Control	0.0436103	0.075845	0.574992	36	0.568873	0.723519	NA	0.873418	0	0.244984	Acat1	THIL_MOUSE	Acetyl-CoA acetyltransferase, mitochondrial (EC 2.3.1.9) (Acetoacetyl-CoA thiolase)	0.244984	0.0436103	0.14055	Q8QZT1
Q99MS7	Combo-Control	0.0432805	0.0900981	0.48037	35	0.633953	0.773861	NA	0.592857	0	0.197943	Ehbp1l1	EH1L1_MOUSE	EH domain-binding protein 1-like protein 1 (Tangerin)	0.197943	0.0432805	0.111337	Q99MS7
Q9D0B6	Combo-Control	0.0431711	0.083271	0.518441	36	0.607322	0.753642	NA	0.584783	0	0.216581	Pbdc1	PBDC1_MOUSE	Protein PBDC1 (Polysaccharide biosynthesis domain-containing protein 1)	0.216581	0.0431711	0.122835	Q9D0B6
Q791V5	Combo-Control	0.0431511	0.152392	0.283159	36	0.778677	0.874325	NA	0.723611	0	0.108643	Mtch2	MTCH2_MOUSE	Mitochondrial carrier homolog 2	0.108643	0.0431511	0.058327	Q791V5
Q9EPK2	Combo-Control	0.0431154	0.145828	0.29566	36	0.769188	0.868839	NA	0.333333	0	0.113967	Rp2 Rp2h	XRP2_MOUSE	Protein XRP2	0.113967	0.0431154	0.0610608	Q9EPK2
Q80WW9	Combo-Control	0.0430212	0.0979412	0.439255	36	0.663102	0.793165	NA	0.3625	0	0.17842	Ddrgk1 Ufbp1	DDRGK_MOUSE	DDRGK domain-containing protein 1 (UFM1-binding and PCI domain-containing protein 1)	0.17842	0.0430212	0.100636	Q80WW9
O35435	Combo-Control	0.0425356	0.127731	0.333008	36	0.74106	0.850564	NA	0.2625	0	0.130147	Dhodh	PYRD_MOUSE	Dihydroorotate dehydrogenase (quinone), mitochondrial (DHOdehase) (EC 1.3.5.2) (Dihydroorotate oxidase)	0.130147	0.0425356	0.0702932	O35435
P09602	Combo-Control	0.0425308	0.167747	0.253541	36	0.801292	0.887926	NA	0.677419	0	0.096209	Hmgn2 Hmg-17 Hmg17	HMGN2_MOUSE	Non-histone chromosomal protein HMG-17 (High mobility group nucleosome-binding domain-containing protein 2)	0.096209	0.0425308	0.0516232	P09602
Q7TNE3	Combo-Control	0.0421411	0.142317	0.296107	34	0.768949	0.868839	NA	0.1	0	0.114102	Spag7	SPAG7_MOUSE	Sperm-associated antigen 7	0.114102	0.0421411	0.0610608	Q7TNE3
Q60902	Combo-Control	0.042134	0.118514	0.355518	36	0.724276	0.838039	NA	0.713462	0	0.140096	Eps15l1 Eps15-rs Eps15R	EP15R_MOUSE	Epidermal growth factor receptor substrate 15-like 1 (Epidermal growth factor receptor pathway substrate 15-related sequence) (Eps15-rs) (Eps15-related protein) (Eps15R)	0.140096	0.042134	0.0767355	Q60902
Q9CR62	Combo-Control	0.042082	0.146914	0.286439	36	0.776184	0.872758	NA	0.740789	0	0.110035	Slc25a11	M2OM_MOUSE	Mitochondrial 2-oxoglutarate/malate carrier protein (OGCP) (Solute carrier family 25 member 11)	0.110035	0.042082	0.0591064	Q9CR62
Q9D113	Combo-Control	0.0417947	0.117723	0.355027	35	0.7247	0.838112	NA	0.05	0	0.139842	Dnlz D2Bwg1335e	DNLZ_MOUSE	DNL-type zinc finger protein (Hsp70-escort protein 1) (HEP1) (mtHsp70-escort protein)	0.139842	0.0417947	0.0766981	Q9D113
Q6AW69	Combo-Control	0.0411714	0.12578	0.32733	36	0.745315	0.853684	NA	0	0	0.12766	Cgnl1 Jacop Kiaa1749	CGNL1_MOUSE	Cingulin-like protein 1 (Junction-associated coiled-coil protein)	0.12766	0.0411714	0.0687026	Q6AW69
Q58A65	Combo-Control	0.0403044	0.0810697	0.497158	36	0.6221	0.764768	NA	0.7	0	0.20614	Spag9 Jip4 Jsap2 Kiaa0516 Mapk8ip4	JIP4_MOUSE	C-Jun-amino-terminal kinase-interacting protein 4 (JIP-4) (JNK-interacting protein 4) (JNK-associated leucine-zipper protein) (JLP) (JNK/SAPK-associated protein 2) (JSAP2) (Mitogen-activated protein kinase 8-interacting protein 4) (Sperm-associated antigen 9)	0.20614	0.0403044	0.11647	Q58A65
Q8VE97	Combo-Control	0.0402693	0.126174	0.319157	36	0.751452	0.857054	NA	0.444444	0	0.124099	Srsf4 Sfrs4 MNCb-2616	SRSF4_MOUSE	Serine/arginine-rich splicing factor 4 (Splicing factor, arginine/serine-rich 4)	0.124099	0.0402693	0.0669917	Q8VE97
Q99JY9	Combo-Control	0.0402631	0.0692155	0.581707	36	0.564389	0.719912	NA	0.923077	0	0.248421	Actr3 Arp3	ARP3_MOUSE	Actin-related protein 3 (Actin-like protein 3)	0.248421	0.0402631	0.142721	Q99JY9
Q9DB77	Combo-Control	0.0401254	0.121738	0.329606	36	0.743608	0.852488	NA	0.883721	0	0.128656	Uqcrc2	QCR2_MOUSE	Cytochrome b-c1 complex subunit 2, mitochondrial (Complex III subunit 2) (Core protein II) (Ubiquinol-cytochrome-c reductase complex core protein 2)	0.128656	0.0401254	0.0693116	Q9DB77
Q8QZV7	Combo-Control	0.0400468	0.106365	0.376505	36	0.708752	0.82572	NA	0.05	0	0.149506	IntS13 Asun Spata30	INT13_MOUSE	Integrator complex subunit 13 (Cell cycle regulator Mat89Bb homolog) (Protein asunder homolog) (Spermatogenesis-associated protein 30)	0.149506	0.0400468	0.0831671	Q8QZV7
Q9DCT6	Combo-Control	0.0399307	0.105402	0.378841	32	0.707308	0.824908	NA	0.1	0	0.150391	Bap18	BAP18_MOUSE	Chromatin complexes subunit BAP18 (BPTF-associated protein of 18 kDa)	0.150391	0.0399307	0.0835945	Q9DCT6
Q8K0H5	Combo-Control	0.0397854	0.35851	0.110974	3	0.918645	0.955484	NA	0.8	0	0.0368524	Taf10 Taf2h Tafii30	TAF10_MOUSE	Transcription initiation factor TFIID subunit 10 (Transcription initiation factor TFIID 30 kDa subunit) (TAF(II)30) (TAFII-30) (TAFII30) (mTAFII30)	0.0368524	0.0397854	0.0197764	Q8K0H5
Q99M71	Combo-Control	0.0393587	0.199184	0.1976	35	0.844501	0.910334	NA	0.05	0	0.0733997	Epdr1 Epdr2 Merp1 Merp2	EPDR1_MOUSE	Mammalian ependymin-related protein 1 (MERP-1)	0.0733997	0.0393587	0.0407993	Q99M71
Q8VDN2	Combo-Control	0.0389497	0.0919929	0.423399	36	0.674523	0.801966	NA	0.930556	0	0.171003	Atp1a1	AT1A1_MOUSE	Sodium/potassium-transporting ATPase subunit alpha-1 (Na(+)/K(+) ATPase alpha-1 subunit) (EC 7.2.2.13) (Sodium pump subunit alpha-1)	0.171003	0.0389497	0.095844	Q8VDN2
P39061	Combo-Control	0.0387	0.109234	0.354285	36	0.725192	0.838112	NA	0.757143	0	0.139547	Col18a1	COIA1_MOUSE	Collagen alpha-1(XVIII) chain [Cleaved into: Endostatin; Non-collagenous domain 1 (NC1)]	0.139547	0.0387	0.0766981	P39061
Q3UMT1	Combo-Control	0.0383535	0.168429	0.227714	34	0.821233	0.898855	NA	0.45	0	0.0855338	Ppp1r12c Mbs85	PP12C_MOUSE	Protein phosphatase 1 regulatory subunit 12C (Protein phosphatase 1 myosin-binding subunit of 85 kDa) (Protein phosphatase 1 myosin-binding subunit p85)	0.0855338	0.0383535	0.0463105	Q3UMT1
Q91YN0	Combo-Control	0.0379941	0.179663	0.211474	23	0.83438	0.903686	NA	0.59	0	0.0786361	D6Wsu163e	CL004_MOUSE	Protein C12orf4 homolog	0.0786361	0.0379941	0.0439824	Q91YN0
Q9WV98	Combo-Control	0.037894	0.08431	0.44946	36	0.655794	0.788769	NA	0.590476	0	0.183233	Timm9 Tim9 Tim9a Timm9a	TIM9_MOUSE	Mitochondrial import inner membrane translocase subunit Tim9	0.183233	0.037894	0.10305	Q9WV98
Q8CI08	Combo-Control	0.0376399	0.267211	0.140862	15	0.889853	0.936562	NA	0.4	0	0.0506818	Slain2 Kiaa1458	SLAI2_MOUSE	SLAIN motif-containing protein 2	0.0506818	0.0376399	0.0284634	Q8CI08
Q810B6	Combo-Control	0.0373425	0.0742909	0.502652	36	0.61827	0.760911	NA	0.872603	0	0.208822	Ankfy1 Ankhzn Kiaa1255	ANFY1_MOUSE	Rabankyrin-5 (Rank-5) (Ankyrin repeat and FYVE domain-containing protein 1) (Ankyrin repeats hooked to a zinc finger motif)	0.208822	0.0373425	0.118666	Q810B6
P55937	Combo-Control	0.0366719	0.0841483	0.435801	36	0.665583	0.794601	NA	0.763636	0	0.176798	Golga3 Mea2	GOGA3_MOUSE	Golgin subfamily A member 3 (Golgin-160) (Male-enhanced antigen 2) (MEA-2)	0.176798	0.0366719	0.0998511	P55937
Q8BFR1	Combo-Control	0.0364642	0.511674	0.0712646	36	0.943582	0.972012	NA	0.45	0	0.0252205	Zc3hav1l	ZCCHL_MOUSE	Zinc finger CCCH-type antiviral protein 1-like	0.0252205	0.0364642	0.0123283	Q8BFR1
P52480	Combo-Control	0.0361462	0.0860776	0.419926	36	0.677035	0.804292	NA	0.979123	0	0.169389	Pkm Pk3 Pkm2 Pykm	KPYM_MOUSE	Pyruvate kinase PKM (EC 2.7.1.40) (Pyruvate kinase muscle isozyme)	0.169389	0.0361462	0.0945864	P52480
Q0VGB7	Combo-Control	0.0360908	0.108152	0.333705	35	0.740593	0.850253	NA	0.693333	0	0.13042	Ppp4r2	PP4R2_MOUSE	Serine/threonine-protein phosphatase 4 regulatory subunit 2	0.13042	0.0360908	0.0704519	Q0VGB7
Q9CZ42	Combo-Control	0.0360724	0.0582893	0.61885	36	0.539912	0.700626	NA	0.396667	0	0.267677	Naxd Carkd	NNRD_MOUSE	ATP-dependent (S)-NAD(P)H-hydrate dehydratase (EC 4.2.1.93) (ATP-dependent NAD(P)HX dehydratase) (Carbohydrate kinase domain-containing protein) (NAD(P)HX dehydratase)	0.267677	0.0360724	0.154514	Q9CZ42
Q8BGS2	Combo-Control	0.0357991	0.0983934	0.363837	36	0.718108	0.833474	NA	0.580952	0	0.14381	Bola2	BOLA2_MOUSE	BolA-like protein 2	0.14381	0.0357991	0.0791081	Q8BGS2
Q78IK4	Combo-Control	0.0350916	0.121643	0.288481	36	0.774633	0.872469	NA	0.472222	0	0.110904	Apool Fam121a Mic27	MIC27_MOUSE	MICOS complex subunit Mic27 (Apolipoprotein O-like) (Protein FAM121A)	0.110904	0.0350916	0.05925	Q78IK4
Q9D6K7	Combo-Control	0.0346809	0.146925	0.236044	36	0.814736	0.895134	NA	0.025	0	0.088983	Ttc33	TTC33_MOUSE	Tetratricopeptide repeat protein 33 (TPR repeat protein 33)	0.088983	0.0346809	0.0481119	Q9D6K7
Q80YR5	Combo-Control	0.0345059	0.190232	0.181389	21	0.857802	0.918062	NA	0.416667	0	0.066613	Safb2	SAFB2_MOUSE	Scaffold attachment factor B2 (SAF-B2)	0.066613	0.0345059	0.0371282	Q80YR5
Q3TEA8	Combo-Control	0.0340919	0.11418	0.298579	36	0.766978	0.867922	NA	0.818182	0	0.115217	Hp1bp3	HP1B3_MOUSE	Heterochromatin protein 1-binding protein 3	0.115217	0.0340919	0.0615193	Q3TEA8
Q9Z0M6	Combo-Control	0.0338622	0.123473	0.274248	33	0.785603	0.877338	NA	0.366667	0	0.104797	Cd97	CD97_MOUSE	CD97 antigen (CD antigen CD97) [Cleaved into: CD97 antigen subunit alpha; CD97 antigen subunit beta]	0.104797	0.0338622	0.0568331	Q9Z0M6
P35486	Combo-Control	0.0338599	0.0774956	0.436926	36	0.664774	0.79429	NA	0.83871	0	0.177326	Pdha1 Pdha-1	ODPA_MOUSE	Pyruvate dehydrogenase E1 component subunit alpha, somatic form, mitochondrial (EC 1.2.4.1) (PDHE1-A type I)	0.177326	0.0338599	0.100021	P35486
P19221	Combo-Control	0.0336519	0.19995	0.168302	36	0.867288	0.923317	NA	0.876515	0	0.0618367	F2 Cf2	THRB_MOUSE	Prothrombin (EC 3.4.21.5) (Coagulation factor II) [Cleaved into: Activation peptide fragment 1; Activation peptide fragment 2; Thrombin light chain; Thrombin heavy chain]	0.0618367	0.0336519	0.0346491	P19221
Q3UVL4	Combo-Control	0.0334587	0.112234	0.298115	36	0.767329	0.868094	NA	0.382143	0	0.115018	Vps51 Ffr	VPS51_MOUSE	Vacuolar protein sorting-associated protein 51 homolog (Protein fat-free homolog)	0.115018	0.0334587	0.0614334	Q3UVL4
Q07417	Combo-Control	0.0334149	0.0901164	0.370797	36	0.712961	0.829718	NA	0.817391	0	0.146934	Acads	ACADS_MOUSE	Short-chain specific acyl-CoA dehydrogenase, mitochondrial (SCAD) (EC 1.3.8.1) (Butyryl-CoA dehydrogenase)	0.146934	0.0334149	0.0810694	Q07417
Q9Z0G0	Combo-Control	0.0328959	0.0957427	0.343586	34	0.733273	0.845201	NA	0.5	0	0.134734	Gipc1 Gipc Rgs19ip1 Semcap1	GIPC1_MOUSE	PDZ domain-containing protein GIPC1 (GAIP C-terminus-interacting protein) (RGS-GAIP-interacting protein) (RGS19-interacting protein 1) (SemaF cytoplasmic domain-associated protein 1) (SEMCAP-1) (Synectin)	0.134734	0.0328959	0.0730401	Q9Z0G0
Q61510	Combo-Control	0.0326296	0.0908278	0.359247	36	0.721509	0.835634	NA	0.716071	0	0.141758	Trim25 Efp Zfp147 Znf147	TRI25_MOUSE	E3 ubiquitin/ISG15 ligase TRIM25 (EC 6.3.2.n3) (Estrogen-responsive finger protein) (RING-type E3 ubiquitin transferase) (EC 2.3.2.27) (RING-type E3 ubiquitin transferase TRIM25) (Tripartite motif-containing protein 25) (Ubiquitin/ISG15-conjugating enzyme TRIM25) (Zinc finger protein 147)	0.141758	0.0326296	0.077984	Q61510
Q9D1G3	Combo-Control	0.03255	0.459984	0.0707635	25	0.944149	0.972037	NA	0.4375	0	0.0249594	Hhatl Gup1 Kiaa1173	HHATL_MOUSE	Protein-cysteine N-palmitoyltransferase HHAT-like protein (Glycerol uptake/transporter homolog) (Hedgehog acyltransferase-like protein)	0.0249594	0.03255	0.0123171	Q9D1G3
Q8BRN9	Combo-Control	0.0323792	0.0678392	0.477293	36	0.636039	0.775317	NA	0.697368	0	0.196516	Cc2d1b Kiaa1836	C2D1B_MOUSE	Coiled-coil and C2 domain-containing protein 1B (Five prime repressor element under dual repression-binding protein 2) (FRE under dual repression-binding protein 2) (Freud-2)	0.196516	0.0323792	0.110521	Q8BRN9
Q9CWE0	Combo-Control	0.0322927	0.192913	0.167395	26	0.868354	0.92389	NA	0.575	0	0.061303	Mtfr1l Fam54b	MFR1L_MOUSE	Mitochondrial fission regulator 1-like	0.061303	0.0322927	0.0343798	Q9CWE0
Q6PD03	Combo-Control	0.032276	0.0876247	0.368343	35	0.714836	0.831009	NA	0.333333	0	0.145794	Ppp2r5a	2A5A_MOUSE	Serine/threonine-protein phosphatase 2A 56 kDa regulatory subunit alpha isoform (PP2A B subunit isoform B'-alpha) (PP2A B subunit isoform B56-alpha) (PP2A B subunit isoform PR61-alpha) (PR61alpha) (PP2A B subunit isoform R5-alpha)	0.145794	0.032276	0.0803944	Q6PD03
Q8BHD7	Combo-Control	0.0322011	0.0989257	0.325508	36	0.746681	0.853977	NA	0.82234	0	0.126865	Ptbp3 Rod1	PTBP3_MOUSE	Polypyrimidine tract-binding protein 3 (Regulator of differentiation 1) (Rod1)	0.126865	0.0322011	0.0685538	Q8BHD7
O08917	Combo-Control	0.0319808	0.0603196	0.53019	36	0.599236	0.74789	NA	0.708065	0	0.222402	Flot1	FLOT1_MOUSE	Flotillin-1	0.222402	0.0319808	0.126163	O08917
Q9EPB5	Combo-Control	0.0319715	0.139625	0.228982	36	0.820179	0.897937	NA	0.333333	0	0.0860913	Serhl	SERHL_MOUSE	Serine hydrolase-like protein (SHL) (EC 3.1.-.-)	0.0860913	0.0319715	0.0467542	Q9EPB5
Q9ESD7	Combo-Control	0.0318243	0.236527	0.134548	36	0.893719	0.938913	NA	0.5	0	0.0487992	Dysf Fer1l1	DYSF_MOUSE	Dysferlin (Dystrophy-associated fer-1-like protein) (Fer-1-like protein 1)	0.0487992	0.0318243	0.0273748	Q9ESD7
Q3TMP8	Combo-Control	0.0315923	0.536541	0.0588813	25	0.953515	0.976919	NA	0.266667	0	0.0206726	Tmem38a	TM38A_MOUSE	Trimeric intracellular cation channel type A (TRIC-A) (TRICA) (27 kDa sarcoplasmic reticulum protein) (Mitsugumin-33A) (SPR-27) (Transmembrane protein 38A)	0.0206726	0.0315923	0.0101416	Q3TMP8
Q922P9	Combo-Control	0.0312747	0.0770948	0.405665	36	0.68739	0.811928	NA	0.58	0	0.162797	Glyr1 Np60	GLYR1_MOUSE	Putative oxidoreductase GLYR1 (EC 1.-.-.-) (Glyoxylate reductase 1 homolog) (Nuclear protein NP60)	0.162797	0.0312747	0.0904826	Q922P9
P58137	Combo-Control	0.0305746	0.0866385	0.352898	36	0.726223	0.838868	NA	0.767857	0	0.13893	Acot8 Pte1	ACOT8_MOUSE	Acyl-coenzyme A thioesterase 8 (Acyl-CoA thioesterase 8) (EC 3.1.2.1) (EC 3.1.2.11) (EC 3.1.2.2) (EC 3.1.2.3) (EC 3.1.2.5) (Choloyl-coenzyme A thioesterase) (EC 3.1.2.27) (Peroxisomal acyl-CoA thioesterase 2) (PTE-2) (Peroxisomal acyl-coenzyme A thioester hydrolase 1) (PTE-1) (Peroxisomal long-chain acyl-CoA thioesterase 1)	0.13893	0.0305746	0.0763063	P58137
P14901	Combo-Control	0.029992	0.0882086	0.340013	36	0.735823	0.84724	NA	0.787234	0	0.133227	Hmox1	HMOX1_MOUSE	Heme oxygenase 1 (HO-1) (EC 1.14.14.18) (P32 protein)	0.133227	0.029992	0.0719933	P14901
Q3UH60	Combo-Control	0.0299779	0.1183	0.253405	31	0.801628	0.887926	NA	0.533333	0	0.096027	Dip2b Kiaa1463	DIP2B_MOUSE	Disco-interacting protein 2 homolog B (DIP2 homolog B)	0.096027	0.0299779	0.0516232	Q3UH60
Q3ULJ0	Combo-Control	0.0298383	0.107012	0.278832	36	0.781969	0.876209	NA	0.707407	0	0.10681	Gpd1l Kiaa0089	GPD1L_MOUSE	Glycerol-3-phosphate dehydrogenase 1-like protein (EC 1.1.1.8)	0.10681	0.0298383	0.0573921	Q3ULJ0
E9Q555	Combo-Control	0.0297635	0.122333	0.243299	36	0.809155	0.892194	NA	0.935185	0	0.0919685	Rnf213 Mystr	RN213_MOUSE	E3 ubiquitin-protein ligase RNF213 (EC 2.3.2.27) (EC 3.6.4.-) (Mysterin) (RING finger protein 213) (RING-type E3 ubiquitin transferase RNF213)	0.0919685	0.0297635	0.0495408	E9Q555
Q6PFQ7	Combo-Control	0.0295868	0.153163	0.193171	36	0.847911	0.911745	NA	0.315	0	0.07165	Rasa4 Capri Kiaa0538	RASL2_MOUSE	Ras GTPase-activating protein 4 (Calcium-promoted Ras inactivator) (Ras p21 protein activator 4) (RasGAP-activating-like protein 2)	0.07165	0.0295868	0.0401265	Q6PFQ7
Q61771	Combo-Control	0.0290841	0.186085	0.156295	23	0.877165	0.929846	NA	0.45	0	0.0569189	Kif3b	KIF3B_MOUSE	Kinesin-like protein KIF3B (Microtubule plus end-directed kinesin motor 3B) [Cleaved into: Kinesin-like protein KIF3B, N-terminally processed]	0.0569189	0.0290841	0.031589	Q61771
P13020	Combo-Control	0.02906	0.0869242	0.334314	36	0.740083	0.849891	NA	0.942151	0	0.13072	Gsn Gsb	GELS_MOUSE	Gelsolin (Actin-depolymerizing factor) (ADF) (Brevin)	0.13072	0.02906	0.0706366	P13020
P63271	Combo-Control	0.0288405	0.0727532	0.396415	36	0.694139	0.816468	NA	0.025	0	0.158554	NA	NA	NA	0.158554	0.0288405	0.0880611	P63271;Q9Z199
P70297	Combo-Control	0.0288273	0.164433	0.175313	36	0.861816	0.920089	NA	0	0	0.0645856	Stam Stam1	STAM1_MOUSE	Signal transducing adapter molecule 1 (STAM-1)	0.0645856	0.0288273	0.0361699	P70297
P28063	Combo-Control	0.0286538	0.161038	0.177932	36	0.859774	0.919448	NA	0.714286	0	0.0656157	Psmb8 Lmp7 Mc13	PSB8_MOUSE	Proteasome subunit beta type-8 (EC 3.4.25.1) (Low molecular mass protein 7) (Macropain subunit C13) (Multicatalytic endopeptidase complex subunit C13) (Proteasome component C13) (Proteasome subunit beta-5i)	0.0656157	0.0286538	0.0364728	P28063
Q9D051	Combo-Control	0.0281355	0.068166	0.412749	36	0.682238	0.808435	NA	0.772727	0	0.166064	Pdhb	ODPB_MOUSE	Pyruvate dehydrogenase E1 component subunit beta, mitochondrial (PDHE1-B) (EC 1.2.4.1)	0.166064	0.0281355	0.0923547	Q9D051
P38060	Combo-Control	0.0275733	0.0548346	0.502846	36	0.618135	0.760911	NA	0.634091	0	0.208917	Hmgcl	HMGCL_MOUSE	Hydroxymethylglutaryl-CoA lyase, mitochondrial (HL) (HMG-CoA lyase) (EC 4.1.3.4) (3-hydroxy-3-methylglutarate-CoA lyase)	0.208917	0.0275733	0.118666	P38060
Q9CQU0	Combo-Control	0.0273236	0.117237	0.233063	36	0.817032	0.8963	NA	0.6875	0	0.0877608	Txndc12 Tlp19	TXD12_MOUSE	Thioredoxin domain-containing protein 12 (EC 1.8.4.2) (Endoplasmic reticulum resident protein 19) (ER protein 19) (ERp19) (Thioredoxin-like protein p19)	0.0877608	0.0273236	0.0475468	Q9CQU0
P47811	Combo-Control	0.0270087	0.0803056	0.336324	36	0.738579	0.848656	NA	0.647368	0	0.131603	Mapk14 Crk1 Csbp1 Csbp2	MK14_MOUSE	Mitogen-activated protein kinase 14 (MAP kinase 14) (MAPK 14) (EC 2.7.11.24) (CRK1) (Mitogen-activated protein kinase p38 alpha) (MAP kinase p38 alpha)	0.131603	0.0270087	0.0712683	P47811
Q6P9P6	Combo-Control	0.0269783	0.604279	0.0446454	6	0.965839	0.981942	NA	0.65	0	0.0150954	Kif11	KIF11_MOUSE	Kinesin-like protein KIF11 (Kinesin-related motor protein Eg5)	0.0150954	0.0269783	0.00791436	Q6P9P6
Q99L13	Combo-Control	0.0269233	0.125127	0.215168	36	0.830851	0.901889	NA	0.505263	0	0.0804768	Hibadh	3HIDH_MOUSE	3-hydroxyisobutyrate dehydrogenase, mitochondrial (HIBADH) (EC 1.1.1.31)	0.0804768	0.0269233	0.044847	Q99L13
P97494	Combo-Control	0.0266271	0.155766	0.170943	36	0.865226	0.922467	NA	0.393333	0	0.0628704	Gclc Glclc	GSH1_MOUSE	Glutamate--cysteine ligase catalytic subunit (EC 6.3.2.2) (GCS heavy chain) (Gamma-ECS) (Gamma-glutamylcysteine synthetase)	0.0628704	0.0266271	0.035049	P97494
Q9D975	Combo-Control	0.0263176	0.120704	0.218034	36	0.828634	0.901142	NA	0	0	0.0816372	Srxn1 Npn3 Srx	SRXN1_MOUSE	Sulfiredoxin-1 (EC 1.8.98.2) (Neoplastic progression protein 3)	0.0816372	0.0263176	0.0452066	Q9D975
P62821	Combo-Control	0.026315	0.0581343	0.452659	36	0.65351	0.786895	NA	0.818519	0	0.184748	Rab1A Rab1	RAB1A_MOUSE	Ras-related protein Rab-1A (YPT1-related protein)	0.184748	0.026315	0.104083	P62821
A6H611	Combo-Control	0.0262864	0.129413	0.20312	20	0.841094	0.907336	NA	0.45	0	0.0751556	Mipep	MIPEP_MOUSE	Mitochondrial intermediate peptidase (MIP) (EC 3.4.24.59)	0.0751556	0.0262864	0.0422317	A6H611
Q9Z2F7	Combo-Control	0.0262057	0.242847	0.10791	28	0.914837	0.952923	NA	0.425	0	0.0386565	Bnip3l Nix	BNI3L_MOUSE	BCL2/adenovirus E1B 19 kDa protein-interacting protein 3-like (NIP3-like protein X) (NIP3L)	0.0386565	0.0262057	0.0209423	Q9Z2F7
Q9DC50	Combo-Control	0.0261719	0.10715	0.244255	36	0.80842	0.891809	NA	0.05	0	0.092363	Crot Cot	OCTC_MOUSE	Peroxisomal carnitine O-octanoyltransferase (COT) (EC 2.3.1.137)	0.092363	0.0261719	0.0497283	Q9DC50
Q9CZ13	Combo-Control	0.0259318	0.103133	0.251441	36	0.802903	0.889111	NA	0.882941	0	0.095337	Uqcrc1	QCR1_MOUSE	Cytochrome b-c1 complex subunit 1, mitochondrial (Complex III subunit 1) (Core protein I) (Ubiquinol-cytochrome-c reductase complex core protein 1)	0.095337	0.0259318	0.0510441	Q9CZ13
Q8VDD8	Combo-Control	0.0259142	0.106504	0.243317	35	0.80918	0.892194	NA	0.225	0	0.0919549	Washc1 Orf19 Wash Wash1	WASH1_MOUSE	WASH complex subunit 1 (WAS protein family homolog 1)	0.0919549	0.0259142	0.0495408	Q8VDD8
O54774	Combo-Control	0.0258599	0.0869506	0.297409	36	0.767864	0.868472	NA	0.85614	0	0.114716	Ap3d1 Ap3d	AP3D1_MOUSE	AP-3 complex subunit delta-1 (AP-3 complex subunit delta) (Adaptor-related protein complex 3 subunit delta-1) (Delta-adaptin) (mBLVR1)	0.114716	0.0258599	0.0612441	O54774
Q64523	Combo-Control	0.0248151	0.110466	0.224641	36	0.823529	0.899464	NA	0.615385	0	0.084321	NA	NA	NA	0.084321	0.0248151	0.0460164	Q64523;Q6GSS7
P70280	Combo-Control	0.0247242	0.108745	0.227358	36	0.821432	0.898855	NA	0.316667	0	0.0854286	Vamp7 Sybl1	VAMP7_MOUSE	Vesicle-associated membrane protein 7 (VAMP-7) (Synaptobrevin-like protein 1)	0.0854286	0.0247242	0.0463105	P70280
Q62009	Combo-Control	0.0245803	0.119871	0.205057	36	0.838682	0.906086	NA	0.915385	0	0.0764024	Postn Osf2	POSTN_MOUSE	Periostin (PN) (Osteoblast-specific factor 2) (OSF-2)	0.0764024	0.0245803	0.0428306	Q62009
Q9D6K5	Combo-Control	0.0243328	0.111977	0.217302	36	0.8292	0.901449	NA	0.233333	0	0.0813406	Synj2bp Arip2 Omp25	SYJ2B_MOUSE	Synaptojanin-2-binding protein (Activin receptor-interacting protein 2) (Activin receptor-interacting protein 4) (Mitochondrial outer membrane protein 25)	0.0813406	0.0243328	0.0450589	Q9D6K5
O55143	Combo-Control	0.0240592	0.123133	0.195392	36	0.846184	0.911017	NA	0.858571	0	0.072535	Atp2a2	AT2A2_MOUSE	Sarcoplasmic/endoplasmic reticulum calcium ATPase 2 (SERCA2) (SR Ca(2+)-ATPase 2) (EC 7.2.2.10) (Calcium pump 2) (Calcium-transporting ATPase sarcoplasmic reticulum type, slow twitch skeletal muscle isoform) (Endoplasmic reticulum class 1/2 Ca(2+) ATPase)	0.072535	0.0240592	0.0404734	O55143
Q8BWT1	Combo-Control	0.0239408	0.062396	0.383692	36	0.703464	0.823064	NA	0.890805	0	0.152758	Acaa2	THIM_MOUSE	3-ketoacyl-CoA thiolase, mitochondrial (EC 2.3.1.16) (Acetyl-CoA acetyltransferase) (EC 2.3.1.9) (Acetyl-CoA acyltransferase) (Acyl-CoA hydrolase, mitochondrial) (EC 3.1.2.-) (EC 3.1.2.1) (EC 3.1.2.2) (Beta-ketothiolase) (Mitochondrial 3-oxoacyl-CoA thiolase)	0.152758	0.0239408	0.0845663	Q8BWT1
Q99J95	Combo-Control	0.0237803	0.12301	0.19332	24	0.848335	0.911976	NA	0.3	0	0.0714324	Cdk9	CDK9_MOUSE	Cyclin-dependent kinase 9 (EC 2.7.11.22) (EC 2.7.11.23) (Cell division protein kinase 9)	0.0714324	0.0237803	0.0400164	Q99J95
P49446	Combo-Control	0.0237751	0.0736047	0.32301	36	0.748556	0.855099	NA	0.404545	0	0.125776	Ptpre Ptpe	PTPRE_MOUSE	Receptor-type tyrosine-protein phosphatase epsilon (Protein-tyrosine phosphatase epsilon) (R-PTP-epsilon) (EC 3.1.3.48)	0.125776	0.0237751	0.0679837	P49446
O35900	Combo-Control	0.0236841	0.120926	0.195856	36	0.845824	0.910855	NA	0.567391	0	0.07272	Lsm2 G7b	LSM2_MOUSE	U6 snRNA-associated Sm-like protein LSm2 (Protein G7b) (snRNP core Sm-like protein Sm-x5)	0.07272	0.0236841	0.0405507	O35900
Q9JLV1	Combo-Control	0.0235335	0.0872733	0.269653	36	0.788967	0.879059	NA	0.823214	0	0.102941	Bag3 Bis MNCb-2243	BAG3_MOUSE	BAG family molecular chaperone regulator 3 (BAG-3) (Bcl-2-associated athanogene 3) (Bcl-2-binding protein Bis)	0.102941	0.0235335	0.0559818	Q9JLV1
P63213	Combo-Control	0.0234894	0.21248	0.110549	3	0.918955	0.955484	NA	0.85	0	0.0367057	Gng2	GBG2_MOUSE	Guanine nucleotide-binding protein G(I)/G(S)/G(O) subunit gamma-2 (G gamma-I)	0.0367057	0.0234894	0.0197764	P63213
Q9CQ92	Combo-Control	0.0229486	0.0882009	0.260186	36	0.796203	0.885304	NA	0.687097	0	0.0989764	Fis1 Ttc11	FIS1_MOUSE	Mitochondrial fission 1 protein (FIS1 homolog) (Tetratricopeptide repeat protein 11) (TPR repeat protein 11)	0.0989764	0.0229486	0.0529076	Q9CQ92
Q8R326	Combo-Control	0.022873	0.091459	0.250091	36	0.803939	0.889702	NA	0.481579	0	0.094777	Pspc1 Psp1	PSPC1_MOUSE	Paraspeckle component 1 (Paraspeckle protein 1) (mPSP1)	0.094777	0.022873	0.0507554	Q8R326
O70492	Combo-Control	0.02264	0.0907662	0.249433	36	0.804444	0.88991	NA	0.604762	0	0.0945042	Snx3	SNX3_MOUSE	Sorting nexin-3 (SDP3 protein)	0.0945042	0.02264	0.0506541	O70492
Q60597	Combo-Control	0.0223592	0.0929197	0.24063	36	0.811207	0.892922	NA	0.91036	0	0.0908682	Ogdh Kiaa4192	ODO1_MOUSE	2-oxoglutarate dehydrogenase, mitochondrial (EC 1.2.4.2) (2-oxoglutarate dehydrogenase complex component E1) (OGDC-E1) (Alpha-ketoglutarate dehydrogenase)	0.0908682	0.0223592	0.0491867	Q60597
Q571I9	Combo-Control	0.0222085	0.0915478	0.24259	36	0.8097	0.892266	NA	0.769767	0	0.0916758	Aldh16a1	A16A1_MOUSE	Aldehyde dehydrogenase family 16 member A1	0.0916758	0.0222085	0.0495059	Q571I9
Q03265	Combo-Control	0.0221446	0.0612762	0.361391	36	0.71992	0.834323	NA	0.961832	0	0.142716	Atp5f1a Atp5a1	ATPA_MOUSE	ATP synthase subunit alpha, mitochondrial (ATP synthase F1 subunit alpha)	0.142716	0.0221446	0.0786657	Q03265
O35654	Combo-Control	0.0220797	0.116395	0.189697	34	0.850675	0.91336	NA	0.325	0	0.0702365	Pold2	DPOD2_MOUSE	DNA polymerase delta subunit 2 (DNA polymerase delta subunit p50)	0.0702365	0.0220797	0.0393578	O35654
Q61941	Combo-Control	0.0220208	0.112386	0.195939	36	0.84576	0.910855	NA	0.850746	0	0.0727531	Nnt	NNTM_MOUSE	NAD(P) transhydrogenase, mitochondrial (EC 7.1.1.1) (Nicotinamide nucleotide transhydrogenase) (Pyridine nucleotide transhydrogenase)	0.0727531	0.0220208	0.0405507	Q61941
Q9QZ08	Combo-Control	0.0218586	0.0902829	0.242112	36	0.810067	0.892266	NA	0.478947	0	0.0914791	Nagk Gnk	NAGK_MOUSE	N-acetyl-D-glucosamine kinase (N-acetylglucosamine kinase) (EC 2.7.1.59) (GlcNAc kinase)	0.0914791	0.0218586	0.0495059	Q9QZ08
P63328	Combo-Control	0.0218443	0.0719933	0.303421	36	0.763316	0.866035	NA	0.715714	0	0.117296	Ppp3ca Calna	PP2BA_MOUSE	Serine/threonine-protein phosphatase 2B catalytic subunit alpha isoform (EC 3.1.3.16) (CAM-PRP catalytic subunit) (Calmodulin-dependent calcineurin A subunit alpha isoform) (CNA alpha)	0.117296	0.0218443	0.0624646	P63328
Q9DAK9	Combo-Control	0.02181	0.139203	0.156678	36	0.876374	0.929235	NA	0.10625	0	0.0573103	Phpt1 Php14	PHP14_MOUSE	14 kDa phosphohistidine phosphatase (EC 3.9.1.3) (Phosphohistidine phosphatase 1) (PHPT1) (Protein histidine phosphatase) (PHP)	0.0573103	0.02181	0.0318744	Q9DAK9
Q9D154	Combo-Control	0.0214322	0.143905	0.148933	36	0.882438	0.93293	NA	0.797778	0	0.054316	Serpinb1a Serpinb1	ILEUA_MOUSE	Leukocyte elastase inhibitor A (Serine protease inhibitor EIA) (Serpin B1a)	0.054316	0.0214322	0.0301508	Q9D154
Q9Z315	Combo-Control	0.021331	0.125944	0.169369	36	0.866454	0.922773	NA	0.68913	0	0.0622544	Sart1 Haf	SNUT1_MOUSE	U4/U6.U5 tri-snRNP-associated protein 1 (Hypoxia-associated factor) (Squamous cell carcinoma antigen recognized by T-cells 1) (SART-1) (mSART-1)	0.0622544	0.021331	0.0349053	Q9Z315
Q8WUR0	Combo-Control	0.0211372	0.21009	0.10061	35	0.920434	0.956498	NA	0.05	0	0.0360073	NA	CS012_MOUSE	Protein C19orf12 homolog	0.0360073	0.0211372	0.0193161	Q8WUR0
Q3U7R1	Combo-Control	0.02107	0.0738495	0.28531	36	0.777042	0.872969	NA	0.925769	0	0.109556	Esyt1 Fam62a Mbc2	ESYT1_MOUSE	Extended synaptotagmin-1 (E-Syt1) (Membrane-bound C2 domain-containing protein)	0.109556	0.02107	0.0590012	Q3U7R1
Q91YE7	Combo-Control	0.0210047	0.209968	0.100037	17	0.921485	0.95674	NA	0.6	0	0.0355118	Rbm5 Luca15	RBM5_MOUSE	RNA-binding protein 5 (Putative tumor suppressor LUCA15) (RNA-binding motif protein 5)	0.0355118	0.0210047	0.019206	Q91YE7
Q9D5T0	Combo-Control	0.0209348	0.134744	0.155367	36	0.8774	0.929868	NA	0.34	0	0.0568025	Atad1	ATAD1_MOUSE	ATPase family AAA domain-containing protein 1 (EC 3.6.1.3) (Thorase)	0.0568025	0.0209348	0.0315786	Q9D5T0
Q64442	Combo-Control	0.0208043	0.127855	0.162718	36	0.87165	0.925711	NA	0.545238	0	0.0596577	Sord Sdh1	DHSO_MOUSE	Sorbitol dehydrogenase (SDH) (SORD) (EC 1.1.1.-) (L-iditol 2-dehydrogenase) (EC 1.1.1.14) (Polyol dehydrogenase) (Xylitol dehydrogenase) (XDH) (EC 1.1.1.9)	0.0596577	0.0208043	0.0335245	Q64442
P52623	Combo-Control	0.0207382	0.133816	0.154976	35	0.87773	0.929992	NA	0.3	0	0.0566389	Uck1 Umpk	UCK1_MOUSE	Uridine-cytidine kinase 1 (UCK 1) (EC 2.7.1.48) (Cytidine monophosphokinase 1) (Uridine monophosphokinase 1)	0.0566389	0.0207382	0.031521	P52623
Q9Z2G6	Combo-Control	0.0205789	0.0931652	0.220887	36	0.826429	0.900612	NA	0.552941	0	0.0827945	Sel1l Sel1h	SE1L1_MOUSE	Protein sel-1 homolog 1 (Suppressor of lin-12-like protein 1) (Sel-1L)	0.0827945	0.0205789	0.0454624	Q9Z2G6
Q9D898	Combo-Control	0.0200386	0.0789409	0.253842	36	0.801062	0.887926	NA	0	0	0.0963341	Arpc5l	ARP5L_MOUSE	Actin-related protein 2/3 complex subunit 5-like protein (Arp2/3 complex 16 kDa subunit 2) (ARC16-2)	0.0963341	0.0200386	0.0516232	Q9D898
Q91W67	Combo-Control	0.019991	0.145857	0.137059	28	0.891965	0.937978	NA	0.2	0	0.0496521	Ubl7	UBL7_MOUSE	Ubiquitin-like protein 7	0.0496521	0.019991	0.0278072	Q91W67
A2AMM0	Combo-Control	0.0199203	0.371945	0.0535572	21	0.957794	0.978305	NA	0.475	0	0.0187278	Cavin4 Murc	CAVN4_MOUSE	Caveolae-associated protein 4 (Muscle-related coiled-coil protein) (Muscle-restricted coiled-coil protein)	0.0187278	0.0199203	0.00952553	A2AMM0
Q9ET80	Combo-Control	0.0196089	0.502125	0.0390519	18	0.969279	0.98401	NA	0.4	0	0.0135513	Jph1 Jp1	JPH1_MOUSE	Junctophilin-1 (JP-1) (Junctophilin type 1)	0.0135513	0.0196089	0.00700068	Q9ET80
P99026	Combo-Control	0.0195401	0.160245	0.121939	36	0.903626	0.944749	NA	0.680645	0	0.0440114	Psmb4 Lmp3	PSB4_MOUSE	Proteasome subunit beta type-4 (EC 3.4.25.1) (Low molecular mass protein 3) (Macropain beta chain) (Multicatalytic endopeptidase complex beta chain) (Proteasome beta chain) (Proteasome chain 3)	0.0440114	0.0195401	0.0246835	P99026
Q9D0F9	Combo-Control	0.0189938	0.158051	0.120175	36	0.905013	0.945972	NA	0.909091	0	0.0433452	Pgm1 Pgm2	PGM1_MOUSE	Phosphoglucomutase-1 (PGM 1) (EC 5.4.2.2) (Glucose phosphomutase 1) (Phosphoglucomutase-2)	0.0433452	0.0189938	0.0241219	Q9D0F9
Q80XI3	Combo-Control	0.0189621	0.176149	0.107649	36	0.914872	0.952923	NA	0.571053	0	0.0386396	Eif4g3	IF4G3_MOUSE	Eukaryotic translation initiation factor 4 gamma 3 (eIF-4-gamma 3) (eIF-4G 3) (eIF4G 3) (eIF-4-gamma II) (eIF4GII)	0.0386396	0.0189621	0.0209423	Q80XI3
P97300	Combo-Control	0.0185681	0.0765078	0.242696	36	0.809618	0.892266	NA	0.486111	0	0.0917196	Nptn Sdfr1 Sdr1	NPTN_MOUSE	Neuroplastin (Stromal cell-derived receptor 1) (SDR-1)	0.0917196	0.0185681	0.0495059	P97300
Q8CFX1	Combo-Control	0.0183689	0.123194	0.149105	36	0.882303	0.93293	NA	0.795714	0	0.0543824	H6pd	G6PE_MOUSE	GDH/6PGL endoplasmic bifunctional protein [Includes: Hexose-6-phosphate dehydrogenase (Glucose 1-dehydrogenase) (EC 1.1.1.47) (Glucose-6-phosphate dehydrogenase) (EC 1.1.1.363); 6-phosphogluconolactonase (6PGL) (EC 3.1.1.31)]	0.0543824	0.0183689	0.0301508	Q8CFX1
P68134	Combo-Control	0.0183535	0.599581	0.0306106	36	0.975749	0.986427	NA	0.756061	0	0.0106618	Acta1 Acta	ACTS_MOUSE	Actin, alpha skeletal muscle (Alpha-actin-1) [Cleaved into: Actin, alpha skeletal muscle, intermediate form]	0.0106618	0.0183535	0.00593514	P68134
O08709	Combo-Control	0.0182303	0.0958946	0.190107	36	0.850293	0.913176	NA	0.912281	0	0.0704314	Prdx6 Aop2 Ltw4 Prdx5	PRDX6_MOUSE	Peroxiredoxin-6 (EC 1.11.1.15) (1-Cys peroxiredoxin) (1-Cys PRX) (Acidic calcium-independent phospholipase A2) (aiPLA2) (EC 3.1.1.4) (Antioxidant protein 2) (Non-selenium glutathione peroxidase) (NSGPx)	0.0704314	0.0182303	0.0394453	O08709
P52825	Combo-Control	0.0177554	0.0871132	0.203819	36	0.839642	0.906291	NA	0.717647	0	0.0759056	Cpt2 Cpt-2	CPT2_MOUSE	Carnitine O-palmitoyltransferase 2, mitochondrial (EC 2.3.1.21) (Carnitine palmitoyltransferase II) (CPT II)	0.0759056	0.0177554	0.0427323	P52825
Q61147	Combo-Control	0.0176866	0.142553	0.124071	36	0.901949	0.944718	NA	0.951478	0	0.0448178	Cp	CERU_MOUSE	Ceruloplasmin (EC 1.16.3.1) (Ferroxidase)	0.0448178	0.0176866	0.0246979	Q61147
Q9D706	Combo-Control	0.0170699	0.320974	0.0531817	24	0.958027	0.978305	NA	0.85	0	0.0186221	Rpap3 D15Ertd682e	RPAP3_MOUSE	RNA polymerase II-associated protein 3	0.0186221	0.0170699	0.00952553	Q9D706
Q99L00	Combo-Control	0.0169323	0.29998	0.0564449	17	0.955646	0.977444	NA	0.5	0	0.0197032	Haus8 Hice1	HAUS8_MOUSE	HAUS augmin-like complex subunit 8 (HEC1/NDC80-interacting centrosome-associated protein 1) (Sarcoma antigen NY-SAR-48 homolog)	0.0197032	0.0169323	0.00990802	Q99L00
Q60772	Combo-Control	0.016676	0.158901	0.104946	36	0.917001	0.954596	NA	0.245833	0	0.03763	Cdkn2c	CDN2C_MOUSE	Cyclin-dependent kinase 4 inhibitor C (Cyclin-dependent kinase 6 inhibitor) (p18-INK4c) (p18-INK6)	0.03763	0.016676	0.0201804	Q60772
Q9JHW4	Combo-Control	0.0165013	0.0982619	0.167932	35	0.867603	0.923317	NA	0.266667	0	0.0616788	Eefsec Selb	SELB_MOUSE	Selenocysteine-specific elongation factor (Elongation factor sec) (Eukaryotic elongation factor, selenocysteine-tRNA-specific) (mSelB)	0.0616788	0.0165013	0.0346491	Q9JHW4
Q9CXT8	Combo-Control	0.0157562	0.0755605	0.208524	36	0.835995	0.904533	NA	0.540476	0	0.0777963	Pmpcb	MPPB_MOUSE	Mitochondrial-processing peptidase subunit beta (EC 3.4.24.64) (Beta-MPP) (P-52)	0.0777963	0.0157562	0.0435756	Q9CXT8
Q6PHN9	Combo-Control	0.0153941	0.0895203	0.171962	36	0.86443	0.922467	NA	0.366667	0	0.06327	Rab35	RAB35_MOUSE	Ras-related protein Rab-35	0.06327	0.0153941	0.035049	Q6PHN9
Q8BWU5	Combo-Control	0.0153787	0.0795156	0.193405	36	0.847729	0.911745	NA	0.41	0	0.0717431	Osgep	OSGEP_MOUSE	Probable tRNA N6-adenosine threonylcarbamoyltransferase (EC 2.3.1.234) (N6-L-threonylcarbamoyladenine synthase) (t(6)A synthase) (O-sialoglycoprotein endopeptidase) (t(6)A37 threonylcarbamoyladenosine biosynthesis protein Osgep) (tRNA threonylcarbamoyladenosine biosynthesis protein Osgep)	0.0717431	0.0153787	0.0401265	Q8BWU5
Q9EQK5	Combo-Control	0.0153516	0.0722693	0.212422	36	0.832976	0.902691	NA	0.947027	0	0.0793676	Mvp	MVP_MOUSE	Major vault protein (MVP)	0.0793676	0.0153516	0.0444609	Q9EQK5
P46460	Combo-Control	0.0150268	0.0997154	0.150697	36	0.881056	0.932377	NA	0.791667	0	0.0549966	Nsf Skd2	NSF_MOUSE	Vesicle-fusing ATPase (EC 3.6.4.6) (N-ethylmaleimide-sensitive fusion protein) (NEM-sensitive fusion protein) (Suppressor of K(+) transport growth defect 2) (Protein SKD2) (Vesicular-fusion protein NSF)	0.0549966	0.0150268	0.0304083	P46460
Q80U78	Combo-Control	0.0147977	1.17268	0.0126187	10	0.99018	0.994195	NA	0.8	0	0.00428575	Pum1 Kiaa0099	PUM1_MOUSE	Pumilio homolog 1	0.00428575	0.0147977	0.00252833	Q80U78
Q922D4	Combo-Control	0.0147723	0.173551	0.0851177	35	0.932653	0.964645	NA	0.533333	0	0.03028	Ppp6r3 D19Ertd703e Kiaa1558 Pp6r3 Saps3	PP6R3_MOUSE	Serine/threonine-protein phosphatase 6 regulatory subunit 3 (SAPS domain family member 3)	0.03028	0.0147723	0.0156326	Q922D4
O35658	Combo-Control	0.0145359	0.151211	0.0961301	36	0.92395	0.958612	NA	0.363333	0	0.0343514	C1qbp Gc1qbp	C1QBP_MOUSE	Complement component 1 Q subcomponent-binding protein, mitochondrial (GC1q-R protein) (Glycoprotein gC1qBP) (C1qBP)	0.0343514	0.0145359	0.018357	O35658
Q9JKF1	Combo-Control	0.0139002	0.060575	0.22947	36	0.819802	0.897751	NA	0.9604	0	0.0862909	Iqgap1	IQGA1_MOUSE	Ras GTPase-activating-like protein IQGAP1	0.0862909	0.0139002	0.0468443	Q9JKF1
P40936	Combo-Control	0.0138159	0.229484	0.0602044	34	0.952345	0.976733	NA	0.19	0	0.0212056	Inmt Temt	INMT_MOUSE	Indolethylamine N-methyltransferase (Indolamine N-methyltransferase) (EC 2.1.1.49) (EC 2.1.1.96) (Aromatic alkylamine N-methyltransferase) (Amine N-methyltransferase) (Arylamine N-methyltransferase) (Thioether S-methyltransferase) (TEMT)	0.0212056	0.0138159	0.0102242	P40936
Q8BGS7	Combo-Control	0.013582	0.136414	0.0995645	36	0.921242	0.956717	NA	0	0	0.0356261	Cept1	CEPT1_MOUSE	Choline/ethanolaminephosphotransferase 1 (mCEPT1) (EC 2.7.8.1) (EC 2.7.8.2)	0.0356261	0.013582	0.0192164	Q8BGS7
Q9DC40	Combo-Control	0.0135618	0.461037	0.0294158	7	0.977354	0.987074	NA	0.75	0	0.00994808	Telo2 Kiaa0683	TELO2_MOUSE	Telomere length regulation protein TEL2 homolog	0.00994808	0.0135618	0.0056501	Q9DC40
O08795	Combo-Control	0.0134084	0.0935364	0.143349	36	0.886814	0.934724	NA	0.8	0	0.0521675	Prkcsh	GLU2B_MOUSE	Glucosidase 2 subunit beta (80K-H protein) (Glucosidase II subunit beta) (Protein kinase C substrate 60.1 kDa protein heavy chain) (PKCSH)	0.0521675	0.0134084	0.0293166	O08795
A2BH40	Combo-Control	0.013355	0.16633	0.080292	35	0.936462	0.967203	NA	0.554545	0	0.0285097	Arid1a Baf250 Baf250a Osa1 Smarcf1	ARI1A_MOUSE	AT-rich interactive domain-containing protein 1A (ARID domain-containing protein 1A) (BRG1-associated factor 250) (BAF250) (BRG1-associated factor 250a) (BAF250A) (Osa homolog 1) (SWI-like protein) (SWI/SNF complex protein p270) (SWI/SNF-related, matrix-associated, actin-dependent regulator of chromatin subfamily F member 1)	0.0285097	0.013355	0.0144826	A2BH40
Q9WTX5	Combo-Control	0.0133257	0.0988622	0.134791	36	0.893528	0.938913	NA	0.758974	0	0.0488919	Skp1 Skp1a	SKP1_MOUSE	S-phase kinase-associated protein 1 (Cyclin-A/CDK2-associated protein p19) (S-phase kinase-associated protein 1A) (p19A) (p19skp1)	0.0488919	0.0133257	0.0273748	Q9WTX5
Q922H4	Combo-Control	0.0131187	0.0675262	0.194275	36	0.847053	0.911281	NA	0.483333	0	0.0720896	Gmppa	GMPPA_MOUSE	Mannose-1-phosphate guanyltransferase alpha (GDP-mannose pyrophosphorylase A) (GTP-mannose-1-phosphate guanylyltransferase alpha)	0.0720896	0.0131187	0.0403478	Q922H4
P47740	Combo-Control	0.0129814	0.135705	0.0956596	36	0.924321	0.958768	NA	0.76	0	0.034177	Aldh3a2 Ahd-3 Ahd3 Aldh3 Aldh4	AL3A2_MOUSE	Aldehyde dehydrogenase family 3 member A2 (EC 1.2.1.3) (EC 1.2.1.94) (Aldehyde dehydrogenase 3) (Fatty aldehyde dehydrogenase)	0.034177	0.0129814	0.0182864	P47740
P29699	Combo-Control	0.0129081	0.242325	0.0532676	36	0.957813	0.978305	NA	0.857143	0	0.0187192	Ahsg Fetua	FETUA_MOUSE	Alpha-2-HS-glycoprotein (Countertrypin) (Fetuin-A)	0.0187192	0.0129081	0.00952553	P29699
Q9ESW4	Combo-Control	0.0128572	0.156649	0.0820765	35	0.935053	0.966491	NA	0.35	0	0.0291636	Agk Mulk	AGK_MOUSE	Acylglycerol kinase, mitochondrial (EC 2.7.1.107) (EC 2.7.1.138) (EC 2.7.1.94) (Multiple substrate lipid kinase) (MuLK) (Multi-substrate lipid kinase)	0.0291636	0.0128572	0.0148023	Q9ESW4
O09117	Combo-Control	0.0127926	0.126468	0.101153	36	0.91999	0.956332	NA	0.1	0	0.0362167	Sypl1 Pphn Sypl	SYPL1_MOUSE	Synaptophysin-like protein 1 (Pantophysin)	0.0362167	0.0127926	0.0193914	O09117
Q5U458	Combo-Control	0.0121367	0.128372	0.0945435	35	0.925217	0.959107	NA	0.333333	0	0.0337566	Dnajc11	DJC11_MOUSE	DnaJ homolog subfamily C member 11	0.0337566	0.0121367	0.018133	Q5U458
Q9D8Y1	Combo-Control	0.0119837	0.121018	0.0990238	26	0.921879	0.95692	NA	0.2	0	0.0353261	Tmem126a	T126A_MOUSE	Transmembrane protein 126A	0.0353261	0.0119837	0.0191241	Q9D8Y1
Q00PI9	Combo-Control	0.0117853	0.0831991	0.141652	36	0.888145	0.93532	NA	0.875325	0	0.0515162	Hnrnpul2 Hnrpul2 Manp	HNRL2_MOUSE	Heterogeneous nuclear ribonucleoprotein U-like protein 2 (MLF1-associated nuclear protein)	0.0515162	0.0117853	0.0290398	Q00PI9
P97370	Combo-Control	0.0117551	0.104222	0.112789	36	0.910825	0.949785	NA	0.571739	0	0.0405652	Atp1b3	AT1B3_MOUSE	Sodium/potassium-transporting ATPase subunit beta-3 (Sodium/potassium-dependent ATPase subunit beta-3) (ATPB-3) (CD antigen CD298)	0.0405652	0.0117551	0.0223745	P97370
Q6ZQA0	Combo-Control	0.0116055	0.0893283	0.129919	36	0.897354	0.941137	NA	0	0	0.0470364	Nbeal2 Kiaa0540	NBEL2_MOUSE	Neurobeachin-like protein 2	0.0470364	0.0116055	0.0263469	Q6ZQA0
Q9ES74	Combo-Control	0.0114917	0.0874355	0.131431	36	0.896167	0.940233	NA	0.674074	0	0.0476113	Nek7	NEK7_MOUSE	Serine/threonine-protein kinase Nek7 (EC 2.7.11.1) (Never in mitosis A-related kinase 7) (NimA-related protein kinase 7)	0.0476113	0.0114917	0.0267644	Q9ES74
P70336	Combo-Control	0.0114171	0.093554	0.122037	36	0.903548	0.944749	NA	0.525	0	0.0440487	Rock2	ROCK2_MOUSE	Rho-associated protein kinase 2 (EC 2.7.11.1) (Rho-associated, coiled-coil-containing protein kinase 2) (Rho-associated, coiled-coil-containing protein kinase II) (ROCK-II) (p164 ROCK-2)	0.0440487	0.0114171	0.0246835	P70336
Q8BXV2	Combo-Control	0.0110561	0.18572	0.059531	33	0.952888	0.976733	NA	0.15	0	0.0209581	Bri3bp	BRI3B_MOUSE	BRI3-binding protein (I3-binding protein)	0.0209581	0.0110561	0.0102242	Q8BXV2
P08032	Combo-Control	0.0110316	0.24176	0.0456305	32	0.963888	0.981657	NA	0.622727	0	0.0159733	Spta1 Spna1 Spta	SPTA1_MOUSE	Spectrin alpha chain, erythrocytic 1 (Erythroid alpha-spectrin)	0.0159733	0.0110316	0.00804037	P08032
Q99LB6	Combo-Control	0.0110152	0.0831359	0.132497	36	0.895329	0.940233	NA	0.707143	0	0.0480173	Mat2b	MAT2B_MOUSE	Methionine adenosyltransferase 2 subunit beta (Methionine adenosyltransferase II beta) (MAT II beta)	0.0480173	0.0110152	0.0267644	Q99LB6
Q923T9	Combo-Control	0.0109673	0.14262	0.0768991	36	0.93913	0.969496	NA	0.596154	0	0.0272745	Camk2g	KCC2G_MOUSE	Calcium/calmodulin-dependent protein kinase type II subunit gamma (CaM kinase II subunit gamma) (CaMK-II subunit gamma) (EC 2.7.11.17)	0.0272745	0.0109673	0.0134539	Q923T9
Q5SUQ9	Combo-Control	0.0107474			0			NA	0.9	0		Ctc1	CTC1_MOUSE	CST complex subunit CTC1 (Alpha-accessory factor of 132 kDa) (AAF-132) (AAF132) (Conserved telomere maintenance component 1)		0.0107474	NA	Q5SUQ9
Q9Z1M0	Combo-Control	0.0101482	0.201182	0.0504427	28	0.960128	0.979396	NA	0.45	0	0.017671	P2rx7 P2x7	P2RX7_MOUSE	P2X purinoceptor 7 (P2X7) (ATP receptor) (P2Z receptor) (Purinergic receptor)	0.017671	0.0101482	0.00904178	Q9Z1M0
Q3UQ84	Combo-Control	0.00997685	0.119948	0.0831767	36	0.934172	0.965986	NA	0.133333	0	0.0295732	Tars2 Tarsl1	SYTM_MOUSE	Threonine--tRNA ligase, mitochondrial (EC 6.1.1.3) (Threonyl-tRNA synthetase) (ThrRS) (Threonyl-tRNA synthetase-like 1)	0.0295732	0.00997685	0.0150293	Q3UQ84
P47753	Combo-Control	0.00992721	0.062219	0.159553	36	0.874125	0.927303	NA	0.761905	0	0.0584263	Capza1 Cappa1	CAZA1_MOUSE	F-actin-capping protein subunit alpha-1 (CapZ alpha-1)	0.0584263	0.00992721	0.0327783	P47753
P57780	Combo-Control	0.00951735	0.111295	0.0855148	36	0.932326	0.964536	NA	0.961434	0	0.0304322	Actn4	ACTN4_MOUSE	Alpha-actinin-4 (Non-muscle alpha-actinin 4)	0.0304322	0.00951735	0.0156814	P57780
P05202	Combo-Control	0.00905536	0.128581	0.0704255	36	0.944245	0.972037	NA	0.927536	0	0.0249154	Got2 Got-2	AATM_MOUSE	Aspartate aminotransferase, mitochondrial (mAspAT) (EC 2.6.1.1) (EC 2.6.1.7) (Fatty acid-binding protein) (FABP-1) (Glutamate oxaloacetate transaminase 2) (Kynurenine aminotransferase 4) (Kynurenine aminotransferase IV) (Kynurenine--oxoglutarate transaminase 4) (Kynurenine--oxoglutarate transaminase IV) (Plasma membrane-associated fatty acid-binding protein) (FABPpm) (Transaminase A)	0.0249154	0.00905536	0.0123171	P05202
Q99L27	Combo-Control	0.00896942	0.0820359	0.109335	36	0.913544	0.952138	NA	0.513158	0	0.0392707	Gmpr2	GMPR2_MOUSE	GMP reductase 2 (GMPR 2) (EC 1.7.1.7) (Guanosine 5'-monophosphate oxidoreductase 2) (Guanosine monophosphate reductase 2)	0.0392707	0.00896942	0.0213001	Q99L27
Q9QWV9	Combo-Control	0.0088799	0.245979	0.0361002	19	0.971579	0.985193	NA	0.45	0	0.0125219	Ccnt1	CCNT1_MOUSE	Cyclin-T1 (CycT1) (Cyclin-T)	0.0125219	0.0088799	0.00647871	Q9QWV9
Q9JHS9	Combo-Control	0.00860139	0.135355	0.0635469	35	0.949693	0.975299	NA	0.608333	0	0.022417	Cwc15 Ed1	CWC15_MOUSE	Spliceosome-associated protein CWC15 homolog (Embryonic development factor 1) (mED1)	0.022417	0.00860139	0.0108621	Q9JHS9
Q9DCJ9	Combo-Control	0.00857973	0.170835	0.0502223	36	0.960223	0.979396	NA	0.481579	0	0.017628	Npl	NPL_MOUSE	N-acetylneuraminate lyase (NALase) (EC 4.1.3.3) (N-acetylneuraminate pyruvate-lyase) (N-acetylneuraminic acid aldolase) (Sialate lyase) (Sialate-pyruvate lyase) (Sialic acid aldolase) (Sialic acid lyase)	0.017628	0.00857973	0.00904178	Q9DCJ9
Q8BT07	Combo-Control	0.00852443	0.231972	0.0367477	29	0.970938	0.985193	NA	0.6	0	0.0128085	Cep55	CEP55_MOUSE	Centrosomal protein of 55 kDa (Cep55)	0.0128085	0.00852443	0.00647871	Q8BT07
Q9Z1Z0	Combo-Control	0.00851159	0.0520019	0.163678	36	0.8709	0.92547	NA	0.859155	0	0.0600318	Uso1 Vdp	USO1_MOUSE	General vesicular transport factor p115 (Protein USO1 homolog) (Transcytosis-associated protein) (TAP) (Vesicle-docking protein)	0.0600318	0.00851159	0.0336377	Q9Z1Z0
Q06185	Combo-Control	0.0082976	0.124141	0.0668401	36	0.947079	0.973791	NA	0.375	0	0.0236139	Atp5me Atp5i Atp5k Lfm-1 Lfm1	ATP5I_MOUSE	ATP synthase subunit e, mitochondrial (ATPase subunit e) (ATP synthase membrane subunit e)	0.0236139	0.0082976	0.011534	Q06185
Q07076	Combo-Control	0.00778785	0.0710059	0.109679	36	0.913273	0.952085	NA	0.878049	0	0.0393993	Anxa7 Anx7	ANXA7_MOUSE	Annexin A7 (Annexin VII) (Annexin-7) (Synexin)	0.0393993	0.00778785	0.0213245	Q07076
P21460	Combo-Control	0.00775851	0.0903095	0.0859103	36	0.932014	0.964531	NA	0.588095	0	0.0305777	Cst3	CYTC_MOUSE	Cystatin-C (Cystatin-3)	0.0305777	0.00775851	0.0156836	P21460
Q91WE2	Combo-Control	0.00759419	0.141501	0.0536688	36	0.957496	0.978305	NA	0.0416667	0	0.0188632	Psme3ip1 Fam192a Nip30	PIP30_MOUSE	PSME3-interacting protein (NEFA-interacting nuclear protein NIP30) (PA28G-interacting protein)	0.0188632	0.00759419	0.00952553	Q91WE2
P70296	Combo-Control	0.00744433	0.102615	0.0725463	36	0.942569	0.97166	NA	0.857857	0	0.025687	Pebp1 Pbp Pebp	PEBP1_MOUSE	Phosphatidylethanolamine-binding protein 1 (PEBP-1) (HCNPpp) [Cleaved into: Hippocampal cholinergic neurostimulating peptide (HCNP)]	0.025687	0.00744433	0.0124855	P70296
O35239	Combo-Control	0.00732047	0.122256	0.0598781	35	0.952593	0.976733	NA	0.565	0	0.0210925	Ptpn9	PTN9_MOUSE	Tyrosine-protein phosphatase non-receptor type 9 (EC 3.1.3.48) (Protein-tyrosine phosphatase MEG2) (PTPase MEG2)	0.0210925	0.00732047	0.0102242	O35239
Q9Z0H8	Combo-Control	0.00720363	0.0982632	0.0733096	36	0.941966	0.971269	NA	0.841	0	0.025965	Clip2 Cyln2 Kiaa0291	CLIP2_MOUSE	CAP-Gly domain-containing linker protein 2 (Cytoplasmic linker protein 115) (CLIP-115) (Cytoplasmic linker protein 2)	0.025965	0.00720363	0.0126604	Q9Z0H8
Q9R1P1	Combo-Control	0.00699317	0.159536	0.0438345	36	0.965279	0.981785	NA	0.772727	0	0.0153473	Psmb3	PSB3_MOUSE	Proteasome subunit beta type-3 (EC 3.4.25.1) (Proteasome chain 13) (Proteasome component C10-II) (Proteasome theta chain)	0.0153473	0.00699317	0.00798368	Q9R1P1
Q9Z2W0	Combo-Control	0.00661299	0.113215	0.0584108	36	0.953744	0.976919	NA	0.858571	0	0.020568	Dnpep	DNPEP_MOUSE	Aspartyl aminopeptidase (EC 3.4.11.21)	0.020568	0.00661299	0.0101416	Q9Z2W0
Q921H8	Combo-Control	0.00632624	0.0664474	0.0952067	36	0.924679	0.95891	NA	0.810577	0	0.0340092	Acaa1a Acaa1	THIKA_MOUSE	3-ketoacyl-CoA thiolase A, peroxisomal (EC 2.3.1.16) (Acetyl-CoA acyltransferase A) (Beta-ketothiolase A) (Peroxisomal 3-oxoacyl-CoA thiolase A)	0.0340092	0.00632624	0.0182223	Q921H8
Q8BI72	Combo-Control	0.00622585	0.172512	0.0360893	36	0.971411	0.985193	NA	0.225	0	0.0125972	Cdkn2aip Carf	CARF_MOUSE	CDKN2A-interacting protein (Collaborator of ARF)	0.0125972	0.00622585	0.00647871	Q8BI72
P58022	Combo-Control	0.00590372	0.504544	0.0117011	6	0.991043	0.994428	NA	0.85	0	0.00390731	Loxl2	LOXL2_MOUSE	Lysyl oxidase homolog 2 (EC 1.4.3.13) (Lysyl oxidase-like protein 2)	0.00390731	0.00590372	0.00242651	P58022
Q8CGU1	Combo-Control	0.00574455	0.191683	0.0299689	32	0.976278	0.986558	NA	0.375	0	0.0104265	Calcoco1 CocoA Kiaa1536	CACO1_MOUSE	Calcium-binding and coiled-coil domain-containing protein 1 (Coiled-coil coactivator protein)	0.0104265	0.00574455	0.0058775	Q8CGU1
Q9D0M3	Combo-Control	0.00554309	0.126293	0.0438908	36	0.965234	0.981785	NA	0.716667	0	0.0153674	Cyc1	CY1_MOUSE	Cytochrome c1, heme protein, mitochondrial (EC 7.1.1.8) (Complex III subunit 4) (Complex III subunit IV) (Cytochrome b-c1 complex subunit 4) (Ubiquinol-cytochrome-c reductase complex cytochrome c1 subunit) (Cytochrome c-1)	0.0153674	0.00554309	0.00798368	Q9D0M3
Q60963	Combo-Control	0.00547497	0.157414	0.0347807	36	0.972447	0.985347	NA	0.813265	0	0.0121342	Pla2g7 Pafah	PAFA_MOUSE	Platelet-activating factor acetylhydrolase (PAF acetylhydrolase) (EC 3.1.1.47) (1-alkyl-2-acetylglycerophosphocholine esterase) (2-acetyl-1-alkylglycerophosphocholine esterase) (LDL-associated phospholipase A2) (LDL-PLA(2)) (PAF 2-acylhydrolase)	0.0121342	0.00547497	0.00641073	Q60963
Q99LM2	Combo-Control	0.00546209	0.0952682	0.0573338	36	0.954596	0.977259	NA	0	0	0.0201802	Cdk5rap3	CK5P3_MOUSE	CDK5 regulatory subunit-associated protein 3	0.0201802	0.00546209	0.00999041	Q99LM2
Q9Z2I9	Combo-Control	0.00524765	0.121844	0.0430685	36	0.965885	0.981942	NA	0.807692	0	0.0150746	Sucla2	SUCB1_MOUSE	Succinate--CoA ligase [ADP-forming] subunit beta, mitochondrial (EC 6.2.1.5) (ATP-specific succinyl-CoA synthetase subunit beta) (A-SCS) (Succinyl-CoA synthetase beta-A chain) (SCS-betaA)	0.0150746	0.00524765	0.00791436	Q9Z2I9
P20152	Combo-Control	0.00508117	0.112814	0.0450404	36	0.964324	0.981657	NA	0.983527	0	0.015777	Vim	VIME_MOUSE	Vimentin	0.015777	0.00508117	0.00804037	P20152
P08752	Combo-Control	0.00457395	0.0824349	0.0554856	36	0.956058	0.977444	NA	0.920635	0	0.0195156	Gnai2 Gnai-2	GNAI2_MOUSE	Guanine nucleotide-binding protein G(i) subunit alpha-2 (Adenylate cyclase-inhibiting G alpha protein)	0.0195156	0.00457395	0.00990802	P08752
Q3UMF0	Combo-Control	0.00428388	0.513896	0.00833609	3	0.993872	0.995707	NA	0.85	0	0.00266946	Cobll1 Coblr1 Kiaa0977	COBL1_MOUSE	Cordon-bleu protein-like 1 (Cobl-related protein 1)	0.00266946	0.00428388	0.00186855	Q3UMF0
Q8BVU5	Combo-Control	0.00388633	0.144514	0.0268923	36	0.978694	0.987794	NA	0.533333	0	0.00935302	Nudt9	NUDT9_MOUSE	ADP-ribose pyrophosphatase, mitochondrial (EC 3.6.1.13) (ADP-ribose diphosphatase) (ADP-ribose phosphohydrolase) (Adenosine diphosphoribose pyrophosphatase) (ADPR-PPase) (Nucleoside diphosphate-linked moiety X motif 9) (Nudix motif 9)	0.00935302	0.00388633	0.0053336	Q8BVU5
Q64324	Combo-Control	0.00376023	0.0783187	0.048012	36	0.961972	0.980489	NA	0.762162	0	0.0168375	Stxbp2 Unc18b	STXB2_MOUSE	Syntaxin-binding protein 2 (MUSEC1) (Protein unc-18 homolog 2) (Munc18-2) (Unc18-2) (Protein unc-18 homolog B) (Unc-18B)	0.0168375	0.00376023	0.00855732	Q64324
Q78PG9	Combo-Control	0.0036942	0.109682	0.0336809	36	0.973318	0.985403	NA	0.35	0	0.0117454	Ccdc25	CCD25_MOUSE	Coiled-coil domain-containing protein 25	0.0117454	0.0036942	0.00638599	Q78PG9
[truncated: 2,820 more rows]
