# Supplementary material for: Combined PD-L1/TGFβ blockade allows expansion and differentiation of stem cell-like CD8 T cells in immune excluded tumors
Source: Nat Commun. 2023 Aug 5;14:4703. doi: 10.1038/s41467-023-40398-4 (PMC10404279; doi:10.1038/s41467-023-40398-4)
Supplement: Supplementary file 5 — Supplementary Data 3 [file 41467_2023_40398_MOESM5_ESM.xlsx]

## Sheet: Combo vs ctr
	baseMean	log2FoldChange	lfcSE	stat	pvalue	padj	type
mt-Atp6	1092.21	-2.81115	0.0788072	-35.6712	1.10635e-278	1.49844e-274	Mitochondrial
Rpl36al	1310.42	-1.49087	0.0438747	-33.9802	4.37175e-253	2.96055e-249	Ribosomal
Rpl30	6307.28	-1.34323	0.0425769	-31.5484	1.88858e-218	8.5263e-215	Ribosomal
Gm10076	585.121	2.75883	0.090617	30.445	1.39664e-203	4.72902e-200	Predicted
Rpl27	4920.47	-1.18781	0.0437616	-27.1427	3.09142e-162	8.37405e-159	Ribosomal
Gm11808	322.471	-2.00784	0.0781844	-25.6808	1.91681e-145	4.32688e-142	Predicted
Rpl29	355.31	-1.94976	0.076099	-25.6213	8.82827e-145	1.70814e-141	Ribosomal
Gm10260	2352.62	1.60659	0.0629457	25.5234	1.08491e-143	1.83675e-140	Predicted
Rps3a2	370.888	2.69494	0.11	24.4994	1.49727e-132	2.25322e-129	Ribosomal
Rpl24	3435.05	-1.14527	0.0468604	-24.44	6.43321e-132	8.71314e-129	Ribosomal
Rnaset2a	493.386	-1.9899	0.0833319	-23.8792	5.04208e-126	6.20817e-123	Coding
Tpt1-ps3	281.221	3.63696	0.152556	23.8401	1.28324e-125	1.44835e-122	Noncoding
Gm8624	246.898	-2.15808	0.0954829	-22.6017	4.16817e-113	4.34259e-110	Predicted
Rps27rt	1150.07	-1.17736	0.0523898	-22.4732	7.59785e-112	7.35037e-109	Ribosomal
Gm9794	387.417	2.08778	0.0950752	21.9593	7.06312e-107	6.37753e-104	Predicted
Gm11478	896.558	-1.73734	0.0798439	-21.7592	5.64644e-105	4.77971e-102	Predicted
Rps10-ps2	286.448	2.34593	0.109564	21.4115	1.04348e-101	8.31346e-99	Ribosomal
Rpl10-ps3	159.837	-2.39339	0.114462	-20.91	4.33966e-97	3.26536e-94	Ribosomal
Rpl23a	3898.8	-0.861574	0.0428504	-20.1066	6.46651e-90	4.6096e-87	Ribosomal
mt-Co3	167.346	-2.20826	0.11349	-19.4577	2.50718e-84	1.69786e-81	Mitochondrial
Rpl35a	3178.26	-0.737433	0.0389595	-18.9282	6.68518e-80	4.31162e-77	Ribosomal
Gm15427	258.49	2.03804	0.108388	18.8031	7.11866e-79	4.38251e-76	Predicted
Rps19-ps6	153.762	2.89925	0.162052	17.8908	1.39078e-71	8.1899e-69	Ribosomal
Rpl15	2586.22	-0.787086	0.0444826	-17.6942	4.64443e-70	2.62101e-67	Ribosomal
Gm10288	179.287	2.26696	0.128843	17.5947	2.70516e-69	1.46555e-66	Predicted
Rps28	6281.52	-0.84518	0.0486097	-17.3871	1.0337e-67	5.38481e-65	Ribosomal
mt-Co2	114.754	-2.21491	0.134835	-16.4268	1.2303e-60	6.17155e-58	Mitochondrial
AL607105.1	186.084	-1.56656	0.097271	-16.1051	2.35064e-58	1.13704e-55	Coding
Rps2-ps10	150.543	-1.70749	0.107687	-15.8561	1.27542e-56	5.95665e-54	Ribosomal
Gm14303	317.237	-1.17503	0.0743662	-15.8006	3.08413e-56	1.39238e-53	Predicted
Gm7536	980.351	-0.928561	0.0590127	-15.7349	8.71544e-56	3.80781e-53	Predicted
Rpl18-ps2	150.451	2.07311	0.135559	15.293	8.51111e-53	3.60233e-50	Ribosomal
Atp5l	461.196	-1.0389	0.0694445	-14.9602	1.33643e-50	5.48505e-48	Coding
Clca3a1	86.1461	-2.19068	0.151174	-14.4911	1.37832e-47	5.4906e-45	Coding
Gm10177	178.94	-1.41672	0.0978714	-14.4753	1.73628e-47	6.71892e-45	Predicted
Gm10443	107.678	-1.74683	0.122605	-14.2476	4.6398e-46	1.74559e-43	Predicted
Rplp0-ps1	89.335	2.94015	0.209476	14.0357	9.42203e-45	3.44897e-42	Ribosomal
Snrpg	1245.76	-0.670771	0.0478251	-14.0255	1.08842e-44	3.87936e-42	Coding
Gm6472	448.716	1.1828	0.0843846	14.0167	1.2313e-44	4.27607e-42	Predicted
Rpl5	4356.77	-0.645099	0.0467119	-13.8102	2.21321e-43	7.49394e-41	Ribosomal
Rpl27a	4814.33	-0.53579	0.0388608	-13.7874	3.03458e-43	1.00245e-40	Ribosomal
Gm15500	522.248	1.01271	0.074563	13.5819	5.12625e-42	1.65309e-39	Predicted
Rpl3-ps1	174.254	1.83189	0.136939	13.3774	8.19202e-41	2.5803e-38	Ribosomal
Gm4332	320.799	1.33609	0.1018	13.1246	2.3794e-39	7.32424e-37	Predicted
Rps16-ps2	208.314	1.29801	0.0996822	13.0215	9.2311e-39	2.77836e-36	Ribosomal
Gm5905	74.3835	2.82445	0.222836	12.675	8.13312e-37	2.39467e-34	Predicted
Ndufb4	111.734	-1.47895	0.121274	-12.1951	3.30171e-34	9.51454e-32	Coding
Rps29	16267.3	-0.395678	0.0325827	-12.1438	6.18923e-34	1.74639e-31	Ribosomal
Gm10073	94.4935	2.20206	0.181494	12.1329	7.06685e-34	1.95333e-31	Predicted
AC120406.1	142.16	-1.36327	0.113034	-12.0607	1.70384e-33	4.61537e-31	Noncoding
Rps10	10191.2	-0.485941	0.0407875	-11.914	1.00082e-32	2.65787e-30	Ribosomal
AC124744.2	181.506	1.33147	0.113301	11.7516	6.92706e-32	1.80423e-29	Noncoding
Gm10925	73.2112	-1.55245	0.139563	-11.1236	9.63035e-29	2.46101e-26	Predicted
Rps7	9446.91	-0.520905	0.0468666	-11.1146	1.06479e-28	2.67066e-26	Ribosomal
Rps18	8441.08	-0.675898	0.0613282	-11.021	3.02722e-28	7.45466e-26	Ribosomal
Rps21	11724.1	-0.30331	0.027585	-10.9955	4.01744e-28	9.71647e-26	Ribosomal
Gm28437	83.859	-1.4608	0.133915	-10.9084	1.05053e-27	2.4962e-25	Predicted
Rplp0	10127.9	-0.514669	0.0473319	-10.8736	1.53962e-27	3.59528e-25	Ribosomal
Gm6274	83.8571	1.92687	0.178703	10.7825	4.16366e-27	9.55806e-25	Predicted
Gm10029	91.3753	-1.37046	0.129265	-10.6019	2.91961e-26	6.59053e-24	Predicted
Serf2	1681.09	-0.596351	0.0565685	-10.5421	5.52519e-26	1.22677e-23	Coding
Rpl26	331.186	-0.814168	0.0783149	-10.3961	2.58336e-25	5.6434e-23	Ribosomal
Rpl21-ps12	51.2802	-1.82641	0.178955	-10.206	1.86397e-24	4.00725e-22	Ribosomal
Gm15920	227.908	-0.890098	0.0873839	-10.1861	2.28833e-24	4.84268e-22	Predicted
Gm9294	45.697	4.39376	0.434936	10.1021	5.40748e-24	1.12675e-21	Predicted
Rpl6l	66.8031	1.85083	0.185275	9.98959	1.69281e-23	3.47386e-21	Ribosomal
Rpl36a-ps2	83.6213	1.61298	0.161886	9.96368	2.1978e-23	4.44284e-21	Ribosomal
Rps19	7871.07	-0.489685	0.0495853	-9.87562	5.31061e-23	1.05775e-20	Ribosomal
Eif1-ps1	43.755	3.31401	0.341835	9.69476	3.17378e-22	6.2298e-20	Noncoding
Rpl39	15313.2	-0.470985	0.0488442	-9.64259	5.28375e-22	1.02233e-19	Ribosomal
4930523C07Rik	67.8471	-1.584	0.165609	-9.5647	1.12525e-21	2.14652e-19	Coding
Rpl39-ps	445.866	-0.747518	0.0787881	-9.4877	2.36188e-21	4.44295e-19	Ribosomal
Gm11810	45.5392	-1.88138	0.199987	-9.40751	5.08043e-21	9.41637e-19	Predicted
Hist1h2ap	207.911	2.1058	0.223874	9.40618	5.1448e-21	9.41637e-19	Coding
Rn7sk	36.3214	-2.25872	0.240861	-9.3777	6.74297e-21	1.21769e-18	Noncoding
Nme2	43.8391	-1.90847	0.204966	-9.31117	1.26434e-20	2.25319e-18	Coding
Gm28661	50.8943	-1.55817	0.168537	-9.24532	2.34539e-20	4.12545e-18	Predicted
Cox17	1232.67	-0.726294	0.0787203	-9.22626	2.80249e-20	4.86628e-18	Coding
Rps10-ps1	144.916	1.02769	0.111605	9.2083	3.31342e-20	5.68063e-18	Ribosomal
Rps27	14986.2	-0.421044	0.0465023	-9.05427	1.37488e-19	2.32767e-17	Ribosomal
Gm10080	43.8024	2.43565	0.270304	9.01078	2.04587e-19	3.4209e-17	Predicted
Rpl41	18864.7	-0.357015	0.0396825	-8.99678	2.32432e-19	3.81355e-17	Ribosomal
Ly6c1	376.591	2.15123	0.239127	8.99618	2.33701e-19	3.81355e-17	Coding
Csnk2a1	157.743	-1.06465	0.118414	-8.99097	2.45059e-19	3.95128e-17	Coding
Gm10155	43.7212	-1.67176	0.186263	-8.97526	2.82694e-19	4.50447e-17	Predicted
Gm2000	106.051	-1.07137	0.11958	-8.95942	3.26404e-19	5.14049e-17	Predicted
Rpsa-ps10	85.2039	1.46597	0.164265	8.92441	4.48089e-19	6.97577e-17	Noncoding
Rpl37rt	416.203	-0.691792	0.0777165	-8.90148	5.51066e-19	8.4814e-17	Ribosomal
Rps24-ps3	80.173	1.66791	0.188262	8.85954	8.03431e-19	1.22266e-16	Ribosomal
Igflr1	25.5972	-2.85248	0.325855	-8.75383	2.06223e-18	3.10343e-16	Coding
Rps25-ps1	69.6078	-1.35896	0.156389	-8.68961	3.6367e-18	5.41269e-16	Ribosomal
Rpl19-ps11	97.7397	1.20897	0.14079	8.58703	8.92425e-18	1.31381e-15	Ribosomal
Gm9625	55.1106	1.81791	0.218585	8.3167	9.04443e-17	1.31718e-14	Predicted
Gm17066	34.741	-1.67467	0.204261	-8.19868	2.43041e-16	3.50186e-14	Predicted
Arpc4	705.659	-0.566861	0.0703029	-8.06313	7.43653e-16	1.05227e-13	Coding
Phb	248.421	-0.716857	0.0889095	-8.06277	7.45851e-16	1.05227e-13	Coding
Gm28438	533.898	0.671672	0.083731	8.02178	1.04226e-15	1.45529e-13	Predicted
Rps15a-ps7	62.9448	1.37324	0.172716	7.95086	1.85223e-15	2.55986e-13	Ribosomal
Rpl10a-ps1	207.504	0.824833	0.104814	7.8695	3.56053e-15	4.87109e-13	Ribosomal
Gm6265	45.2194	1.72599	0.219527	7.8623	3.77133e-15	5.10789e-13	Predicted
Sec61g	236.416	0.789821	0.103236	7.65067	1.99942e-14	2.66475e-12	Coding
Rps2	7419.77	-0.429121	0.0560929	-7.65019	2.00682e-14	2.66475e-12	Ribosomal
Gstp1	59.3168	1.47795	0.193967	7.61958	2.54499e-14	3.34654e-12	Coding
Rpl38-ps2	89.8842	-1.21961	0.161613	-7.54649	4.47146e-14	5.82321e-12	Ribosomal
Gm10093	93.835	-0.966227	0.128288	-7.53169	5.0089e-14	6.40387e-12	Predicted
Uba52	1193.13	-0.445433	0.0591418	-7.53161	5.01189e-14	6.40387e-12	Coding
Lars2	94.7457	-1.1125	0.147866	-7.52373	5.32366e-14	6.73866e-12	Coding
H2-T10	121.592	1.03964	0.13829	7.51781	5.56996e-14	6.98514e-12	Coding
AC132304.1	37.168	-1.47163	0.195916	-7.51153	5.84414e-14	7.26175e-12	Noncoding
Rpl28-ps1	57.2275	1.6528	0.221993	7.44527	9.67459e-14	1.19121e-11	Ribosomal
Rps6-ps3	41.6254	-1.39247	0.187373	-7.43157	1.07312e-13	1.30941e-11	Ribosomal
Mrpl23-ps1	62.9657	-1.12475	0.151434	-7.42732	1.10816e-13	1.34008e-11	Noncoding
Wdr74	36.3259	-1.52495	0.205626	-7.41611	1.20615e-13	1.44567e-11	Coding
AC149090.1	535.427	-0.650507	0.0878237	-7.40696	1.29228e-13	1.53532e-11	Coding
Gm10169	23.9285	2.90459	0.39295	7.39175	1.44914e-13	1.70671e-11	Predicted
Rpl37a	13929.6	-0.284877	0.0386928	-7.36254	1.80447e-13	2.10688e-11	Ribosomal
Gm6023	22.6603	-1.93033	0.263479	-7.32632	2.36554e-13	2.73836e-11	Predicted
Slc38a2	244.838	-0.771547	0.105937	-7.28308	3.26282e-13	3.72824e-11	Coding
Rpl35a-ps5	24.0412	-1.80234	0.247488	-7.28255	3.2757e-13	3.72824e-11	Ribosomal
Gm6863	33.5901	1.91258	0.264163	7.24015	4.48184e-13	5.0585e-11	Predicted
2310010J17Rik	52.4165	-1.28859	0.17808	-7.23601	4.62076e-13	5.16858e-11	Noncoding
Rpl38	7707.56	-0.261917	0.0362014	-7.23499	4.65569e-13	5.16858e-11	Ribosomal
Gm13921	54.3686	-1.1541	0.160393	-7.19546	6.22523e-13	6.85484e-11	Predicted
Nmt1	223.145	-0.76218	0.106422	-7.16188	7.95761e-13	8.69176e-11	Coding
Tsix	66.7391	-1.08798	0.152494	-7.13459	9.70735e-13	1.05181e-10	Noncoding
Gm15542	65.0889	-1.34145	0.189417	-7.082	1.42093e-12	1.52739e-10	Predicted
Rpl36	7631.76	-0.255095	0.0362714	-7.03295	2.02212e-12	2.1565e-10	Ribosomal
Rpl31	1815.21	-0.341127	0.0486679	-7.00928	2.3954e-12	2.53463e-10	Ribosomal
Gm9843	480.416	0.590096	0.0843352	6.99703	2.61445e-12	2.74497e-10	Predicted
Rpl7	5920.63	-0.262035	0.0376475	-6.96021	3.39759e-12	3.53976e-10	Ribosomal
Rpl37	10737.8	-0.276317	0.0397881	-6.94472	3.79199e-12	3.92051e-10	Ribosomal
Zfp644	101.363	-0.924938	0.135588	-6.82168	8.99829e-12	9.2328e-10	Coding
AC121965.1	966.34	-0.366036	0.054074	-6.76916	1.29533e-11	1.31909e-09	Noncoding
Gm7331	20.6958	-1.7336	0.258916	-6.69558	2.14814e-11	2.17123e-09	Predicted
Gm14586	46.9196	1.37139	0.206806	6.63128	3.32783e-11	3.33868e-09	Predicted
Snrpert	19.1125	2.80003	0.424227	6.6003	4.10321e-11	4.08632e-09	Noncoding
B930036N10Rik	53.5406	-1.32235	0.201154	-6.57382	4.9041e-11	4.84826e-09	Noncoding
Cd44	293.264	-0.583625	0.0889596	-6.56056	5.36059e-11	5.26114e-09	Coding
Exosc2	162.882	-1.33069	0.204247	-6.51513	7.26291e-11	7.07689e-09	Coding
n-R5-8s1	11.5033	-2.73187	0.420454	-6.49744	8.16998e-11	7.90387e-09	Noncoding
Gm13340	49.1459	-1.14968	0.176997	-6.49549	8.27662e-11	7.95025e-09	Predicted
Gm15710	32.7982	-1.38795	0.214713	-6.46423	1.01815e-10	9.71117e-09	Predicted
Gm29216	48.1413	-1.19934	0.185901	-6.45152	1.10731e-10	1.04877e-08	Predicted
Mki67	261.831	0.744907	0.115535	6.44748	1.13727e-10	1.06967e-08	Coding
Erh	306.372	0.580775	0.0904201	6.42308	1.33548e-10	1.24743e-08	Coding
Gm8797	73.9611	-0.990716	0.154272	-6.42189	1.34594e-10	1.24859e-08	Predicted
Gm6169	20.741	-1.68887	0.263938	-6.39875	1.56657e-10	1.44338e-08	Predicted
Rpl34	12000.9	-0.273555	0.0431966	-6.3328	2.40757e-10	2.20325e-08	Ribosomal
H2afx	191.951	0.819818	0.12948	6.33164	2.42573e-10	2.20498e-08	Coding
Gm9800	21.582	2.13586	0.338009	6.31894	2.63357e-10	2.37794e-08	Predicted
Gmfg-ps	15.932	3.42706	0.543546	6.30499	2.88212e-10	2.58512e-08	Noncoding
Gm12166	87.2121	-0.801267	0.127365	-6.29111	3.15198e-10	2.80858e-08	Predicted
Nutf2	17.6314	-1.87572	0.299356	-6.26584	3.70818e-10	3.26745e-08	Coding
Pclaf	471.825	0.860798	0.137386	6.26555	3.71521e-10	3.26745e-08	Coding
Gng10	13.1431	-2.0899	0.334323	-6.25113	4.07502e-10	3.56078e-08	Coding
Cdk2ap1	261.783	-0.555299	0.0906616	-6.12496	9.07078e-10	7.82891e-08	Coding
Chchd10	127.184	1.0479	0.171089	6.12488	9.07515e-10	7.82891e-08	Coding
Rnu11	30.8037	-1.63186	0.268239	-6.08361	1.17506e-09	1.00728e-07	Noncoding
Prdx1	1053.67	0.498947	0.0826232	6.03882	1.55243e-09	1.32239e-07	Coding
Gm26825	802.863	-0.972048	0.161171	-6.03117	1.62781e-09	1.37794e-07	Predicted
AY036118	560.148	-1.04134	0.173075	-6.0167	1.78005e-09	1.49745e-07	Noncoding
Tgtp2	34.0848	-1.36257	0.226915	-6.00473	1.91648e-09	1.60227e-07	Coding
Cd200	283.981	-0.816437	0.136198	-5.9945	2.04107e-09	1.69597e-07	Coding
Gm43712	56.6577	1.14148	0.191415	5.9634	2.47048e-09	2.04025e-07	Predicted
Pabpn1	130.938	-0.654415	0.110487	-5.92299	3.16145e-09	2.59507e-07	Coding
Gm13456	15.4984	2.82901	0.479674	5.89778	3.68421e-09	3.00596e-07	Predicted
Gm4342	21.3947	-1.5575	0.268576	-5.79909	6.66752e-09	5.40748e-07	Predicted
AC131120.2	22.5052	1.82497	0.314771	5.79775	6.72094e-09	5.41836e-07	Noncoding
Cox5a	1459.65	0.350267	0.0605238	5.78725	7.15469e-09	5.73391e-07	Coding
Gm10263	21.7286	-1.66032	0.29282	-5.67011	1.4271e-08	1.13698e-06	Predicted
Il18r1	540.58	-0.645031	0.114051	-5.65566	1.55245e-08	1.22962e-06	Coding
Rps23	10054.8	-0.226063	0.0400569	-5.64354	1.66587e-08	1.31178e-06	Ribosomal
Gm12013	335.377	0.477733	0.0847013	5.64021	1.69839e-08	1.32965e-06	Predicted
Gm8292	18.2232	2.28305	0.404987	5.63736	1.72679e-08	1.34411e-06	Predicted
Gm10250	19.0167	2.08515	0.370856	5.62253	1.88182e-08	1.45642e-06	Predicted
Rpl18	7609.51	-0.242303	0.0433535	-5.58901	2.28371e-08	1.75742e-06	Ribosomal
Gm11703	34.0425	-1.40074	0.251613	-5.56705	2.59093e-08	1.98257e-06	Predicted
Rpl17	11478.5	-0.257039	0.0463036	-5.55116	2.83774e-08	2.15924e-06	Ribosomal
Gm7866	40.5661	-1.07548	0.19384	-5.54829	2.88475e-08	2.18274e-06	Predicted
Eif1	4411.81	0.199025	0.035961	5.53445	3.122e-08	2.34913e-06	Coding
Rps6-ps1	15.1475	-1.63083	0.295782	-5.51361	3.51553e-08	2.63062e-06	Ribosomal
Rps25	3648.51	-0.213221	0.0387603	-5.50101	3.77619e-08	2.81015e-06	Ribosomal
1810022K09Rik	165.183	-0.61699	0.112342	-5.49208	3.97235e-08	2.93997e-06	Coding
Gm7808	24.9692	-1.36742	0.249945	-5.47089	4.47781e-08	3.29606e-06	Predicted
Gm10045	13.4115	-1.71211	0.313037	-5.46935	4.51697e-08	3.30691e-06	Predicted
Pbld1	8.15396	-2.40422	0.441074	-5.45083	5.01355e-08	3.65073e-06	Coding
Fam178b	17.2043	-2.25976	0.415025	-5.44488	5.18418e-08	3.75478e-06	Coding
Gm10275	58.5189	0.929974	0.171488	5.42296	5.8621e-08	4.22321e-06	Predicted
Gm37254	30.1756	-1.21309	0.223963	-5.41646	6.0789e-08	4.35622e-06	Predicted
Msi2	271.147	-0.670358	0.124109	-5.40138	6.61298e-08	4.71401e-06	Coding
Atp5h	1846.02	0.277344	0.0514274	5.39293	6.93176e-08	4.91538e-06	Coding
Spc24	113.581	0.729781	0.135974	5.36706	8.00323e-08	5.64561e-06	Coding
Gm3244	37.6868	-1.05193	0.19655	-5.35197	8.70031e-08	6.10555e-06	Predicted
Gm13226	28.6523	1.45003	0.271739	5.33612	9.4955e-08	6.62923e-06	Predicted
Rps6	3502.85	-0.271059	0.0508288	-5.33278	9.67195e-08	6.71779e-06	Ribosomal
Gm11336	11.7076	-2.11671	0.397308	-5.32763	9.95047e-08	6.87598e-06	Predicted
Gm4742	11.8779	3.96695	0.748002	5.3034	1.13667e-07	7.81476e-06	Predicted
Rpl14-ps1	31.1081	1.30168	0.24564	5.29915	1.16343e-07	7.95831e-06	Ribosomal
Oaz1-ps	12.5581	2.81386	0.532199	5.28724	1.24177e-07	8.45155e-06	Noncoding
AC129085.1	4.83453	-3.97009	0.751393	-5.28364	1.26639e-07	8.576e-06	Noncoding
Gm16416	8.60505	-2.3485	0.445874	-5.26718	1.38538e-07	9.33509e-06	Predicted
Gm4204	26.2684	1.49266	0.283942	5.25694	1.46474e-07	9.82099e-06	Predicted
Fbxo5	61.5631	1.08511	0.206623	5.25165	1.50745e-07	1.00576e-05	Coding
Dnajc15	337.374	0.725191	0.138151	5.24925	1.52718e-07	1.01393e-05	Coding
Snrpf	714.781	-0.367095	0.0702396	-5.22632	1.7292e-07	1.14245e-05	Coding
Trac	557.921	0.429955	0.0831947	5.16806	2.36532e-07	1.55514e-05	Coding
Rps26-ps1	273.713	-0.423233	0.0820834	-5.15613	2.52104e-07	1.64951e-05	Ribosomal
A530010L16Rik	19.1665	-1.49116	0.290033	-5.14133	2.72798e-07	1.77633e-05	Noncoding
mt-Atp8	208.903	-0.543058	0.105717	-5.1369	2.79302e-07	1.80999e-05	Mitochondrial
Ccna2	92.1288	0.858435	0.167169	5.13514	2.81938e-07	1.81836e-05	Coding
Gm14279	24.8536	-1.22443	0.238958	-5.12405	2.99049e-07	1.91958e-05	Predicted
Gm13680	12.3543	2.5783	0.505298	5.10254	3.3512e-07	2.14098e-05	Predicted
Gm8186	215.04	0.456933	0.0895998	5.0997	3.40186e-07	2.15305e-05	Predicted
Nsa2	1184.92	-0.278489	0.0546088	-5.0997	3.4019e-07	2.15305e-05	Coding
Gm11281	32.3581	-1.09448	0.214891	-5.09319	3.52088e-07	2.21799e-05	Predicted
Lgals1	5939.3	0.407461	0.0800986	5.08699	3.63791e-07	2.2811e-05	Coding
AC117245.3	40.6341	-1.70116	0.334851	-5.08035	3.76734e-07	2.35138e-05	Noncoding
Adi1	49.0343	-0.934041	0.184121	-5.07298	3.91644e-07	2.43322e-05	Coding
Gm7846	10.2939	3.49858	0.692735	5.05038	4.40923e-07	2.72688e-05	Predicted
Rpl38-ps1	8.40498	-2.25803	0.447478	-5.04613	4.50855e-07	2.77563e-05	Ribosomal
Pomp	894.001	0.288874	0.0573242	5.03931	4.67224e-07	2.86338e-05	Coding
Cyp2e1	9.88069	-2.54204	0.505588	-5.02789	4.95904e-07	3.01297e-05	Coding
Gm4950	12.5004	2.35681	0.468753	5.02782	4.96082e-07	3.01297e-05	Predicted
S100a4	4968.42	-0.464969	0.0925943	-5.02157	5.12504e-07	3.09882e-05	Coding
Ndufa12	109.417	-0.650807	0.129698	-5.01786	5.22514e-07	3.14372e-05	Coding
Zc3h11a	14.0677	-1.67005	0.332871	-5.0171	5.24572e-07	3.14372e-05	Coding
Gm4459	10.7234	3.47568	0.693059	5.01499	5.30375e-07	3.16449e-05	Predicted
Mrpl57	323.136	0.407851	0.0813484	5.01363	5.34121e-07	3.17287e-05	Coding
Gm12696	15.1178	2.25086	0.449233	5.01045	5.4304e-07	3.19936e-05	Predicted
Hilpda	580.125	0.502414	0.100275	5.01035	5.43306e-07	3.19936e-05	Coding
Rpl21-ps15	30.0197	-1.08234	0.216767	-4.99309	5.94196e-07	3.48389e-05	Ribosomal
Krtcap2	982.248	0.324438	0.0650367	4.98854	6.0837e-07	3.55162e-05	Coding
1110032F04Rik	28.6378	-1.2087	0.242659	-4.98105	6.32394e-07	3.67603e-05	Coding
Capza1	199.576	-0.521067	0.104638	-4.97972	6.36767e-07	3.68563e-05	Coding
Angptl2	7.76073	-2.35988	0.474342	-4.97506	6.52284e-07	3.75198e-05	Coding
Mmp14	30.3589	-2.25942	0.454189	-4.97462	6.53771e-07	3.75198e-05	Coding
Grcc10	88.2954	-0.809354	0.162966	-4.96639	6.8212e-07	3.89816e-05	Coding
Mir703	172.917	-0.554	0.111867	-4.95231	7.33377e-07	4.17347e-05	Noncoding
Nt5e	72.4401	-1.42408	0.28772	-4.94953	7.4393e-07	4.21581e-05	Coding
Gm5812	10.9007	2.62231	0.533196	4.91809	8.73915e-07	4.93179e-05	Predicted
Zfp862-ps	95.255	-0.651561	0.132508	-4.91715	8.78128e-07	4.93501e-05	Noncoding
Gm3788	16.6192	1.79621	0.36717	4.89205	9.97907e-07	5.58498e-05	Predicted
Smc2	255.113	0.608376	0.124743	4.87704	1.0769e-06	6.00229e-05	Coding
Dync1i2	204.178	-0.533939	0.109812	-4.86231	1.16023e-06	6.4402e-05	Coding
Kmt2d	71.561	-0.730125	0.150776	-4.84245	1.2825e-06	7.07264e-05	Coding
Nfat5	152.779	-0.588411	0.121519	-4.84212	1.28461e-06	7.07264e-05	Coding
BC051077	6.4087	-2.57423	0.532283	-4.8362	1.32342e-06	7.25682e-05	Noncoding
Gm4366	27.0692	1.29177	0.267366	4.83147	1.35527e-06	7.4015e-05	Predicted
H2-Q6	142.229	0.566436	0.117724	4.81157	1.49751e-06	8.1455e-05	Coding
Trbc1	1004.85	0.876507	0.182538	4.80176	1.57273e-06	8.52044e-05	Coding
Gm37084	32.0284	-1.07685	0.224599	-4.79457	1.63022e-06	8.77138e-05	Predicted
Gm7266	4.34702	4.63559	0.966885	4.79435	1.63201e-06	8.77138e-05	Predicted
Timm10b	300.15	-0.362349	0.0756367	-4.79066	1.66237e-06	8.89924e-05	Coding
Gm11878	9.72109	3.39378	0.709378	4.78416	1.71703e-06	9.15334e-05	Predicted
Tomm6	84.6504	-0.722722	0.151089	-4.78342	1.72335e-06	9.15334e-05	Coding
Rbpj	582.599	-0.597489	0.124996	-4.78005	1.75252e-06	9.27191e-05	Ribosomal
Dpm1	48.9233	-0.843772	0.176853	-4.77105	1.83271e-06	9.65848e-05	Coding
Rpl21-ps1	11.6762	-1.91946	0.402401	-4.77002	1.84205e-06	9.67005e-05	Ribosomal
Cdkn2d	204.116	0.599396	0.125745	4.76674	1.87228e-06	9.77637e-05	Coding
Knl1	58.459	1.04601	0.219461	4.76626	1.87674e-06	9.77637e-05	Coding
Mis18bp1	24.548	1.39572	0.292953	4.7643	1.89512e-06	9.82814e-05	Coding
Gm12184	10.9336	-1.92907	0.404956	-4.76365	1.90119e-06	9.82814e-05	Predicted
Tagln2	1232.3	0.541686	0.11437	4.73625	2.17706e-06	0.000112115	Coding
Rps11-ps2	75.069	0.765516	0.162095	4.72264	2.32805e-06	0.000119109	Ribosomal
Gmnn	152.044	0.593138	0.1256	4.72243	2.33046e-06	0.000119109	Coding
mt-Nd3	7.1583	-2.34441	0.496596	-4.72097	2.34724e-06	0.000119515	Mitochondrial
Snhg9	12.5602	-1.65981	0.351769	-4.71845	2.37645e-06	0.000120549	Noncoding
Atp5o	760.78	0.280741	0.0595941	4.71088	2.46649e-06	0.00012465	Coding
Gm8451	35.224	-0.936937	0.199151	-4.70466	2.54284e-06	0.000127814	Predicted
Cks1b	188.326	0.757845	0.161103	4.70411	2.54977e-06	0.000127814	Coding
Vaultrc5	16.0981	-1.50953	0.320975	-4.70297	2.5641e-06	0.000127814	Noncoding
Adamts6	54.9017	-0.834965	0.17757	-4.70217	2.57415e-06	0.000127814	Coding
Gm27803	11.7355	-1.78015	0.378595	-4.702	2.57629e-06	0.000127814	Predicted
Hspa1b	2635.98	-0.942683	0.20055	-4.70049	2.59542e-06	0.000128293	Coding
Ube2s	658.82	0.484303	0.10306	4.69926	2.6111e-06	0.00012839	Coding
Sec11c	645.937	0.317889	0.0676525	4.69885	2.61633e-06	0.00012839	Coding
Clic1	1997.29	0.247218	0.0526805	4.69277	2.69527e-06	0.000131786	Coding
Tmem245	59.9105	-0.738867	0.157514	-4.69081	2.7213e-06	0.00013258	Coding
Rpl21-ps8	22.171	-1.23153	0.262627	-4.68927	2.74183e-06	0.000133102	Ribosomal
Gm5644	8.79588	3.93052	0.838792	4.68592	2.78702e-06	0.000134812	Predicted
Ier3	306.458	0.697471	0.149051	4.67941	2.87705e-06	0.000138672	Coding
Mpv17l	10.0766	-1.92834	0.412495	-4.67481	2.9422e-06	0.000141309	Coding
Gm5844	9.35455	-1.97636	0.423421	-4.66759	3.04746e-06	0.000145847	Predicted
Gm12854	11.8937	2.38106	0.510685	4.66249	3.12402e-06	0.000148985	Predicted
Elk3	212.123	-0.625436	0.134256	-4.65853	3.18478e-06	0.00015135	Coding
Rps13	10294.2	-0.185068	0.0398891	-4.63957	3.49136e-06	0.000165339	Ribosomal
Tmem14c	363.481	0.358389	0.0773865	4.63116	3.63625e-06	0.000171601	Coding
Smdt1	579.019	0.299548	0.0647107	4.62903	3.67378e-06	0.00017277	Coding
Smad7	355.158	-0.506939	0.10955	-4.62748	3.70135e-06	0.000173464	Coding
Reep5	1121.2	0.286499	0.0622434	4.60289	4.16674e-06	0.000194601	Coding
CT030657.5	5.63989	4.38972	0.9547	4.59801	4.26551e-06	0.00019853	Noncoding
Usmg5	847.41	-0.254001	0.0552914	-4.59387	4.35105e-06	0.000201817	Coding
AC163637.2	9.90436	-1.92667	0.419958	-4.58776	4.48026e-06	0.000207101	Coding
Ndufb10	452.741	0.308907	0.0674221	4.58168	4.61256e-06	0.000212492	Coding
Ankrd37	50.6159	0.830563	0.181382	4.57909	4.66996e-06	0.000214406	Coding
Ulk3	22.8766	-1.10141	0.241141	-4.56748	4.93634e-06	0.000225871	Coding
Ccdc85b	25.4577	1.31032	0.287615	4.55582	5.21818e-06	0.000237963	Coding
Bub1	27.2182	1.23242	0.270772	4.55151	5.32632e-06	0.000241176	Coding
Ap2b1	101.531	-0.594726	0.130683	-4.55089	5.34192e-06	0.000241176	Coding
Gm42814	39.9765	-0.957716	0.210446	-4.55089	5.34206e-06	0.000241176	Predicted
Rpl17-ps10	14.5123	1.76129	0.387108	4.54987	5.36781e-06	0.000241533	Ribosomal
Cenpm	42.5326	0.99065	0.217948	4.54535	5.48428e-06	0.000245428	Coding
Nip7	188.093	-0.66692	0.146742	-4.54486	5.49719e-06	0.000245428	Coding
AC158239.2	33.4552	-0.972605	0.214022	-4.54442	5.50873e-06	0.000245428	Noncoding
Rplp2	9193.52	-0.165478	0.0364291	-4.54247	5.5598e-06	0.000246892	Ribosomal
Gm9790	10.5883	2.47717	0.545761	4.53894	5.65382e-06	0.000250246	Predicted
Tomm7	1222.01	-0.245556	0.0541752	-4.53263	5.82524e-06	0.000256994	Coding
Ndufb11	668.28	0.253843	0.0560297	4.53051	5.88419e-06	0.000258752	Coding
Gm15421	52.2513	0.9332	0.20612	4.52746	5.96968e-06	0.000261661	Predicted
Phf20l1	325.752	-0.341241	0.075555	-4.51646	6.28817e-06	0.000274732	Coding
Fth1	4636.95	0.299746	0.0664037	4.51399	6.36198e-06	0.000277063	Coding
Klra9	9.96804	-3.66343	0.812356	-4.50963	6.49409e-06	0.00028191	Coding
Psma2	891.642	0.269133	0.0597067	4.50758	6.55712e-06	0.000283737	Coding
Gm12840	457.006	-1.50594	0.334774	-4.49838	6.84736e-06	0.000295352	Predicted
Chmp1a	77.1703	-0.607905	0.136012	-4.46949	7.84056e-06	0.000337119	Coding
Aurkb	53.7973	0.897495	0.200915	4.46704	7.93092e-06	0.000339925	Coding
Arhgdib	1988.69	0.342993	0.0768039	4.46582	7.9762e-06	0.000340787	Coding
Gm13835	13.3025	1.81874	0.40897	4.44713	8.70232e-06	0.000370642	Predicted
Gm6394	17.5563	1.47942	0.333209	4.43992	8.99919e-06	0.000382085	Predicted
Ly6e	716.949	0.665105	0.150742	4.41221	1.0232e-05	0.000433071	Coding
Gm12396	8.35293	2.82851	0.641536	4.40897	1.03862e-05	0.000438227	Predicted
Isca1	38.1313	-0.855148	0.19407	-4.40639	1.05106e-05	0.000442099	Coding
AL589871.2	24.5183	-1.55982	0.354055	-4.40559	1.05498e-05	0.000442373	Noncoding
Gm12944	6.04336	-2.27423	0.516975	-4.39912	1.08692e-05	0.000454358	Predicted
Gm6204	8.77747	3.10683	0.707928	4.38863	1.14068e-05	0.000475367	Predicted
4930520O04Rik	21.8671	-1.24315	0.283387	-4.38675	1.15056e-05	0.000478012	Noncoding
Rbpsuh-rs3	22.762	-1.24519	0.283971	-4.38491	1.16032e-05	0.000480592	Ribosomal
Gm10175	9.14661	-1.74455	0.398147	-4.38168	1.17767e-05	0.000486269	Predicted
Gm5561	23.6765	-1.07414	0.24518	-4.38103	1.18121e-05	0.000486269	Predicted
Rab4b	10.6649	-1.63129	0.372695	-4.377	1.20324e-05	0.000493839	Coding
Cd3e	1885.92	-0.424023	0.0969716	-4.37265	1.22748e-05	0.000502267	Coding
Dynlt1c	13.0536	-1.41365	0.32374	-4.36661	1.26192e-05	0.000514802	Coding
Cmtm7	509.317	0.47244	0.108226	4.36531	1.26945e-05	0.000516319	Coding
Gimap7	413.353	0.616918	0.141575	4.35753	1.31539e-05	0.000533403	Coding
Gm12254	364.146	-0.298548	0.0685275	-4.35661	1.32093e-05	0.00053405	Predicted
Rinl	167.247	-0.4435	0.102105	-4.34357	1.40188e-05	0.000565091	Coding
B230206I08Rik	23.3579	-1.21158	0.279406	-4.33626	1.4493e-05	0.000582472	Noncoding
Rpl28-ps3	8.01699	2.82758	0.652976	4.3303	1.48905e-05	0.000596677	Ribosomal
Sumo2	1538.79	0.225486	0.0521188	4.32638	1.51579e-05	0.000604943	Coding
5830444F18Rik	138.008	0.705046	0.16298	4.32597	1.51861e-05	0.000604943	Noncoding
Emp3	541.315	0.655926	0.151746	4.32252	1.54255e-05	0.000612679	Coding
Rpl36a	5248.16	-0.265981	0.0616156	-4.31678	1.58325e-05	0.000627004	Ribosomal
Cdk1	125.405	0.845225	0.196416	4.30324	1.68321e-05	0.000664109	Coding
Rpsa-ps1	9.85147	2.2233	0.516714	4.30277	1.68675e-05	0.000664109	Noncoding
Gm4799	8.08738	2.74796	0.639689	4.29577	1.74088e-05	0.000683434	Predicted
Rnu12	9.37184	-1.62401	0.378838	-4.28682	1.8125e-05	0.000708866	Noncoding
AC154693.1	6.5368	-2.13002	0.496929	-4.28637	1.81613e-05	0.000708866	Noncoding
Rps15a	18243.2	-0.219046	0.0513584	-4.26504	1.99863e-05	0.000777858	Ribosomal
Atp5d	1236.46	0.251149	0.0589633	4.25941	2.0497e-05	0.000795449	Coding
Phf5a	241.2	0.402089	0.0944698	4.25627	2.07867e-05	0.000804384	Coding
Gdpd3	7.67167	-1.8054	0.424705	-4.25096	2.12854e-05	0.000819373	Coding
Txn1	1932.49	0.222225	0.0522805	4.25062	2.13182e-05	0.000819373	Coding
Rps15a-ps8	10.514	2.20353	0.518522	4.24964	2.14112e-05	0.000819373	Ribosomal
Gm10247	30.6615	-0.895679	0.210768	-4.24959	2.1416e-05	0.000819373	Predicted
Birc5	219.946	0.941987	0.221876	4.24556	2.18048e-05	0.000830597	Coding
Ppp1r16b	281.693	-0.356861	0.0840607	-4.24528	2.1832e-05	0.000830597	Coding
H3f3b	4075.16	0.409659	0.0966333	4.23932	2.24201e-05	0.000846727	Coding
Ndufs5	349.266	-0.364942	0.0860852	-4.23931	2.24209e-05	0.000846727	Coding
Shoc2	76.3045	-0.573578	0.135307	-4.23908	2.24435e-05	0.000846727	Coding
Cox6c	1925.06	-0.188625	0.0445111	-4.2377	2.25819e-05	0.00084958	Coding
Tuba4a	123.457	0.60102	0.142001	4.2325	2.31111e-05	0.000867081	Coding
Ahnak	621.737	-0.344279	0.0814154	-4.22867	2.35073e-05	0.000879509	Coding
Cmc2	115.38	0.607477	0.143757	4.22572	2.38178e-05	0.00088746	Coding
Supt16	228.258	0.379761	0.0898755	4.22541	2.38508e-05	0.00088746	Coding
Cadm1	7.13638	-2.51189	0.594631	-4.22429	2.39697e-05	0.000889441	Coding
Pan3	68.4047	-0.627051	0.14849	-4.22284	2.41243e-05	0.00089273	Coding
Mrps14	567.325	0.263218	0.0623421	4.22216	2.41976e-05	0.000893003	Coding
Gm42418	4537.76	-0.682852	0.162434	-4.20389	2.62371e-05	0.000965641	Predicted
Gstp-ps	36.2279	-0.814703	0.19466	-4.18526	2.84836e-05	0.00104548	Noncoding
Txnl1	377.169	0.29327	0.0703429	4.16915	3.05735e-05	0.00111807	Coding
Hk2	74.4393	-0.676968	0.162391	-4.16876	3.06263e-05	0.00111807	Coding
Kif11	65.8903	0.722357	0.173309	4.16804	3.07234e-05	0.0011186	Coding
Rnaseh2c	207.401	0.42634	0.1024	4.16346	3.13462e-05	0.00113821	Coding
Vps54	116.615	-0.541244	0.130053	-4.1617	3.1588e-05	0.00114393	Coding
Dennd5b	6.49437	-1.94063	0.466656	-4.15859	3.20213e-05	0.00115652	Coding
Gm10689	49.5105	-0.733439	0.176653	-4.15186	3.29778e-05	0.0011879	Predicted
Brd9	103.342	-0.485425	0.117	-4.14892	3.34053e-05	0.00120011	Coding
Gm38299	9.60014	-1.82714	0.440494	-4.14795	3.35468e-05	0.00120201	Predicted
Svil	53.0002	-0.660442	0.159297	-4.14597	3.38379e-05	0.00120924	Coding
Gm10269	35.702	-0.941094	0.227532	-4.1361	3.53254e-05	0.00125907	Predicted
Nsun5	20.4774	-1.03101	0.250045	-4.12329	3.73497e-05	0.00132773	Coding
Mrpl30	318.947	0.324587	0.0789779	4.10985	3.95922e-05	0.00140376	Coding
Tacc3	68.7622	0.710292	0.172938	4.10721	4.00461e-05	0.00141615	Coding
Exosc8	205.921	0.381625	0.0930747	4.1002	4.12785e-05	0.00145593	Coding
Arglu1	330.33	-0.34833	0.0850619	-4.09502	4.2213e-05	0.00148502	Coding
Mllt6	97.2971	-0.523089	0.127813	-4.0926	4.26559e-05	0.00149671	Coding
Plac8	1512.7	0.614451	0.15052	4.08218	4.46157e-05	0.00156143	Coding
S100a10	2870.24	0.441952	0.108308	4.08051	4.49375e-05	0.00156864	Coding
Gm7600	16.0169	1.48184	0.364097	4.06989	4.7036e-05	0.00163591	Predicted
Ncapg	55.2089	0.760697	0.186924	4.06954	4.71061e-05	0.00163591	Coding
Cyba	1240.69	0.544262	0.133978	4.06232	4.85877e-05	0.00168228	Coding
Gm14044	27.6404	-0.972626	0.239455	-4.06183	4.86898e-05	0.00168228	Predicted
Spry1	127.512	-0.457683	0.11274	-4.05965	4.91467e-05	0.00169375	Coding
Mdh1	672.619	0.317729	0.078412	4.05205	5.07716e-05	0.00174531	Coding
Rin3	72.7001	-0.589231	0.145673	-4.04488	5.23491e-05	0.00179498	Coding
H2afj	711.559	0.272084	0.0673282	4.04116	5.31874e-05	0.00181912	Coding
Gm16378	2.87912	4.04988	1.00295	4.03796	5.39175e-05	0.00183944	Predicted
Ftl1	2111.64	0.31532	0.0781198	4.03637	5.42851e-05	0.00184733	Coding
Gm8539	6.67826	3.12695	0.775544	4.03194	5.53176e-05	0.00187705	Predicted
Tnfsf8	57.1084	-1.15116	0.285545	-4.03144	5.54357e-05	0.00187705	Coding
Tnfaip8	317.965	-0.319312	0.0792444	-4.02946	5.59053e-05	0.00188776	Coding
Psmb10	409.944	0.284429	0.0705965	4.02893	5.60306e-05	0.00188776	Coding
Gm3375	7.24122	3.25349	0.811117	4.01113	6.04294e-05	0.00203091	Predicted
Sys1	217.581	0.452342	0.112868	4.0077	6.13139e-05	0.00205553	Coding
Cenpf	105.141	1.00126	0.250439	3.998	6.388e-05	0.00213627	Coding
Upf2	97.7011	-0.484009	0.121109	-3.99648	6.42914e-05	0.00214474	Coding
Gm14305	37.7538	-0.754268	0.188818	-3.99468	6.47821e-05	0.0021558	Predicted
Gzmb	5176.67	0.809099	0.202609	3.99341	6.51307e-05	0.00216208	Coding
Tle3	112.144	-0.493148	0.12359	-3.99019	6.60191e-05	0.00218622	Coding
Dad1	790.924	0.257629	0.0646162	3.98706	6.68975e-05	0.0022099	Coding
Gm13075	5.26826	-2.20674	0.553569	-3.98638	6.70895e-05	0.00221085	Predicted
Pfn1	6797.71	0.265377	0.0666491	3.9817	6.84251e-05	0.00224939	Coding
Polr2l	368.189	-0.291031	0.0731495	-3.97858	6.93295e-05	0.0022736	Coding
Marf1	73.3215	-0.565362	0.14228	-3.97359	7.07988e-05	0.00231618	Coding
mt-Nd4l	21.6415	-0.983182	0.247512	-3.97226	7.11941e-05	0.00232336	Mitochondrial
Gm5148	5.33085	-2.15879	0.543543	-3.9717	7.13613e-05	0.00232336	Predicted
Gm23722	5.14615	-2.11899	0.533917	-3.96876	7.22461e-05	0.00234386	Predicted
Tmem181a	23.2036	-1.0659	0.268592	-3.96846	7.23372e-05	0.00234386	Coding
Pkm	1911	0.286722	0.0722728	3.96722	7.27159e-05	0.00235051	Coding
Ndufb9	613.247	0.255749	0.0645086	3.96457	7.35271e-05	0.00237107	Coding
Pttg1	183.225	0.636419	0.160581	3.96323	7.3944e-05	0.00237451	Coding
Hist1h2ag	10.3561	-1.46063	0.36857	-3.96296	7.40259e-05	0.00237451	Coding
Abracl	1237.46	0.287722	0.0726106	3.96253	7.41597e-05	0.00237451	Coding
Rad51ap1	33.2406	1.07224	0.270734	3.9605	7.47926e-05	0.00238407	Coding
Gm12350	8.64656	2.1574	0.544738	3.96045	7.48101e-05	0.00238407	Predicted
Loxl2	4.90907	-2.42632	0.613587	-3.95432	7.67537e-05	0.00244026	Coding
Cox15	18.6867	-1.12796	0.285353	-3.95287	7.72181e-05	0.00244928	Coding
Gm7879	8.08816	-1.61593	0.409197	-3.94901	7.84741e-05	0.0024833	Predicted
Dync1li1	100.073	-0.480578	0.121774	-3.94646	7.93144e-05	0.00250404	Coding
Peli1	469.514	-0.383173	0.0971124	-3.94566	7.95799e-05	0.00250658	Coding
Dok2	421.978	0.587827	0.149139	3.94146	8.09869e-05	0.00254498	Coding
Stmn1	659.345	0.593261	0.150665	3.93761	8.22962e-05	0.0025775	Coding
Gm8326	9.51977	-1.74114	0.442217	-3.9373	8.24024e-05	0.0025775	Predicted
Olfr1238	3.10649	-4.89123	1.24291	-3.93531	8.30906e-05	0.00259304	Coding
Vamp1	22.8756	-1.00711	0.256178	-3.93128	8.44952e-05	0.00263081	Coding
Asf1b	87.7528	0.679251	0.17331	3.91928	8.88133e-05	0.00275892	Coding
Prelid1	662.888	0.217872	0.0557815	3.90581	9.39107e-05	0.00291059	Coding
Cdca3	59.8065	0.739958	0.189528	3.90422	9.45301e-05	0.0029231	Coding
Slfn5	85.5621	-1.12038	0.287278	-3.89998	9.62012e-05	0.00296799	Coding
Manf	604.749	0.33281	0.0853841	3.89779	9.70735e-05	0.0029881	Coding
Atp6v0e	754.094	0.283116	0.0728354	3.88706	0.000101465	0.00311619	Coding
Tet2	48.8267	-0.725704	0.186771	-3.88554	0.000102104	0.00312874	Coding
Gtf2b	134.055	0.504652	0.129936	3.88385	0.000102815	0.0031434	Coding
Ndufa11	458.582	0.261501	0.0673676	3.88171	0.000103724	0.00316404	Coding
Gm7363	6.36746	2.98397	0.770673	3.8719	0.000107988	0.00328673	Predicted
Rpl21-ps10	24.4931	-1.02625	0.26511	-3.87106	0.000108365	0.00329078	Ribosomal
Ddx19b	38.3184	-0.743874	0.192258	-3.86914	0.000109222	0.00330939	Coding
Gm4202	4.97488	-2.02184	0.522746	-3.86774	0.000109851	0.00332102	Predicted
Gm13436	72.7709	0.564238	0.146081	3.86249	0.000112236	0.00338558	Predicted
Rps3a3	31.3293	0.971956	0.251804	3.85997	0.000113403	0.00341317	Ribosomal
Gm9320	18.8163	1.19516	0.310086	3.85429	0.000116067	0.00348561	Predicted
Inpp4b	508.506	-0.398304	0.103421	-3.85129	0.000117495	0.0035207	Coding
Dusp4	390.84	-0.421909	0.109734	-3.84483	0.000120634	0.00360677	Coding
Hist1h2ab	9.7056	-1.73987	0.452794	-3.84252	0.000121778	0.00363296	Coding
Rpl13-ps6	20.848	-1.11856	0.291323	-3.83957	0.000123249	0.00366877	Ribosomal
Gm26205	24.5664	-0.963632	0.251216	-3.83587	0.000125122	0.00371635	Predicted
Rad21	190.325	0.365849	0.0954698	3.83209	0.00012706	0.00376566	Coding
Sf3b5	418.409	0.284039	0.0741824	3.82893	0.000128701	0.00380596	Coding
Acaa1b	6.98388	2.51352	0.657239	3.82436	0.000131113	0.00386884	Coding
H2-K1	8372.77	0.288082	0.0753702	3.82222	0.000132253	0.003894	Coding
Cox6a1	680.765	0.235332	0.0616027	3.82015	0.000133369	0.00391584	Coding
Gm15772	5043.65	-0.139034	0.0363984	-3.81978	0.000133573	0.00391584	Predicted
Tacc1	195.305	-0.426428	0.111942	-3.80935	0.00013933	0.00407579	Coding
Lime1	972.758	0.450148	0.118277	3.80589	0.000141296	0.00412438	Coding
Srp9	558.992	0.230935	0.0607297	3.80267	0.000143145	0.00416937	Coding
Gm7666	5.72159	3.26213	0.858457	3.79999	0.0001447	0.00420561	Predicted
Gm23346	2.86881	-3.29127	0.867685	-3.79316	0.000148739	0.00431104	Predicted
2810454H06Rik	14.4684	-1.18896	0.313478	-3.79279	0.000148964	0.00431104	Noncoding
Gm2225	35.6867	0.84445	0.222818	3.78986	0.00015073	0.00434803	Predicted
Gm6222	7.43371	2.46822	0.651314	3.78961	0.000150884	0.00434803	Predicted
Skil	189.887	-0.42385	0.111994	-3.78457	0.000153977	0.00442773	Coding
Tnrc6a	149.706	-0.418269	0.110675	-3.77924	0.000157305	0.00451385	Coding
H2afv	445.677	0.369927	0.0979014	3.77857	0.000157733	0.00451656	Coding
Slc2a1	128.18	0.43289	0.114796	3.77095	0.000162628	0.00464689	Coding
Il3	19.1559	6.77692	1.79883	3.7674	0.000164957	0.00470106	Coding
Myh9	561.062	-0.355681	0.0944202	-3.76701	0.000165217	0.00470106	Coding
Lamtor3	52.6512	-0.606258	0.161247	-3.7598	0.000170049	0.00482839	Coding
Nuf2	24.1663	1.10623	0.29427	3.75923	0.000170436	0.00482926	Coding
Ccnd2	686.531	-0.38087	0.101396	-3.75627	0.000172462	0.00487646	Coding
St13	513.85	-0.249006	0.0663717	-3.75168	0.000175652	0.00495631	Coding
Cxcr2	8.56879	-3.32629	0.887367	-3.74849	0.000177903	0.00500939	Coding
Gm4149	118.034	0.439479	0.117433	3.74239	0.000182279	0.00512197	Predicted
Mfsd4a	29.5299	-0.806304	0.215803	-3.7363	0.00018675	0.00523672	Coding
Bcap31	363.231	0.27425	0.0734985	3.73137	0.000190442	0.00532923	Coding
Gm9347	76.2701	0.660728	0.177348	3.7256	0.000194852	0.00543901	Predicted
Pitpnc1	183.155	-0.395283	0.106111	-3.72519	0.000195168	0.00543901	Coding
Hist1h4d	72.9904	-0.627311	0.168666	-3.71924	0.00019982	0.00555721	Coding
H2afz	2234.99	0.39277	0.105651	3.7176	0.000201125	0.00558204	Coding
Usp38	79.5282	-0.558003	0.150156	-3.71616	0.000202272	0.00560241	Coding
Gm6563	27.9987	0.969592	0.261484	3.70804	0.000208874	0.00577344	Predicted
Mrpl18	344.595	0.358722	0.0968795	3.70276	0.000213264	0.0058828	Coding
Pbk	30.3969	0.97328	0.263019	3.70042	0.000215243	0.00592344	Coding
Ccnb1	49.2774	0.943358	0.254963	3.69998	0.000215613	0.00592344	Coding
4930486L24Rik	3.42324	-2.63469	0.71284	-3.69604	0.000218985	0.00600391	Coding
Txn-ps1	2.51979	3.83052	1.03674	3.69479	0.00022007	0.00602146	Noncoding
Sft2d1	15.714	1.39747	0.378774	3.68945	0.000224739	0.00612561	Coding
Snrpd1	473.494	0.2994	0.0811514	3.6894	0.000224781	0.00612561	Coding
2810428I15Rik	272.752	0.357223	0.0968827	3.68717	0.000226765	0.00616727	Coding
Gm15682	13.5917	-1.42935	0.388504	-3.67912	0.000234036	0.00634665	Predicted
Hmgn2	336.743	0.400219	0.108789	3.67884	0.000234297	0.00634665	Coding
Psmb4	566.602	0.229432	0.0625337	3.66894	0.000243559	0.00658437	Coding
Gm10704	4.51913	3.40371	0.928434	3.66607	0.000246304	0.00664531	Predicted
Sgo1	23.6948	0.982583	0.26828	3.66253	0.000249735	0.00672447	Coding
Tmem123	301.629	-0.351083	0.0959994	-3.65714	0.000255047	0.00685388	Coding
Cdc34	114.828	0.499299	0.136549	3.65656	0.000255621	0.0068557	Coding
9930111J21Rik1	14.5116	-1.13939	0.312814	-3.64238	0.00027013	0.00723052	Coding
Cript	238.54	0.322125	0.0885342	3.63842	0.000274317	0.00732152	Coding
Gm11560	2.42747	3.80548	1.04599	3.63814	0.000274611	0.00732152	Predicted
Arf6	305.104	-0.294387	0.0810257	-3.63326	0.000279865	0.00744694	Coding
Ptprs	90.4878	-0.559617	0.154174	-3.62979	0.000283657	0.00753303	Coding
Gng5	1107.12	0.226803	0.0625821	3.62409	0.000289981	0.00768592	Coding
Atp8b2	44.2688	-0.707827	0.195586	-3.619	0.000295746	0.00781456	Coding
Spc25	44.0024	0.893959	0.247033	3.61879	0.000295989	0.00781456	Coding
Btf3	2601.92	0.14898	0.0411892	3.61698	0.000298064	0.00784644	Coding
Hvcn1	53.3331	-0.647983	0.179163	-3.61672	0.000298355	0.00784644	Coding
Gm13453	2.38276	3.76558	1.04131	3.61621	0.000298952	0.00784692	Predicted
Gm26909	6.47492	-1.77649	0.491612	-3.61361	0.000301966	0.0079107	Predicted
Ly6a	850.761	1.21356	0.336162	3.61004	0.000306152	0.00800487	Coding
Gm10232	4.29608	3.36624	0.932816	3.60868	0.000307755	0.00803127	Predicted
Gm7676	2.34769	3.7465	1.03993	3.60266	0.000314978	0.00820395	Predicted
Mdh2	666.903	0.206602	0.0574016	3.59924	0.000319154	0.00829679	Coding
Rrm2	168.537	0.568896	0.158456	3.59025	0.000330357	0.00857156	Coding
Jpt1	703.647	0.307518	0.0857492	3.58624	0.000335475	0.00866489	Coding
Gm26526	22.2731	-0.946228	0.26387	-3.58596	0.00033584	0.00866489	Predicted
Ski	86.3354	-0.45903	0.12802	-3.58563	0.000336271	0.00866489	Coding
Gm8667	2.56572	-3.87726	1.08139	-3.58544	0.000336513	0.00866489	Predicted
Gm8420	6.06992	-1.6841	0.469891	-3.58401	0.000338353	0.00868186	Predicted
Pcnp	267.553	-0.28881	0.0805845	-3.58394	0.000338454	0.00868186	Coding
Mrps5	84.0958	-0.495654	0.138379	-3.58186	0.000341152	0.00871957	Coding
Ap1s3	79.5441	-0.517011	0.144343	-3.58182	0.000341212	0.00871957	Coding
Cmas	114.369	0.467927	0.130784	3.57786	0.000346416	0.00883588	Coding
Vdac2	660.661	0.233253	0.065206	3.57717	0.000347338	0.00884275	Coding
Chpt1	89.2533	-0.476008	0.133176	-3.57428	0.000351189	0.00892403	Coding
Psma1	466.779	0.264733	0.0740835	3.57344	0.00035232	0.008936	Coding
Coro1a	3042.8	0.19974	0.0559153	3.57219	0.000354009	0.00896206	Coding
AC140264.1	11.028	-1.47684	0.413644	-3.57032	0.000356549	0.00896803	Noncoding
Rpp25l	90.7306	0.478458	0.134014	3.57021	0.000356697	0.00896803	Coding
Tnip3	43.3997	1.07265	0.300457	3.57007	0.000356883	0.00896803	Coding
Lrr1	16.497	1.20375	0.337178	3.57006	0.000356894	0.00896803	Coding
Gm9493	17.6745	1.16983	0.327939	3.56722	0.000360792	0.00903334	Predicted
AW112010	8169.7	0.426971	0.119694	3.56719	0.000360827	0.00903334	Noncoding
Gm7332	2.27685	3.69176	1.03577	3.56426	0.000364878	0.00911791	Predicted
Gm11942	4.89699	3.0623	0.85931	3.56367	0.000365703	0.00912171	Predicted
Lmnb1	218.029	0.454388	0.127628	3.56026	0.000370487	0.00922403	Coding
Sytl1	36.4101	0.74617	0.209649	3.55913	0.000372081	0.00924671	Coding
Rpl21-ps13	5.89426	-1.67933	0.471947	-3.55831	0.000373245	0.00925867	Ribosomal
Ostc	491.478	0.275771	0.0775542	3.55585	0.000376764	0.00932887	Coding
Hmgb2	2043.51	0.559321	0.157351	3.5546	0.000378557	0.00935616	Coding
Cyth3	25.5622	-1.02658	0.288861	-3.55389	0.000379584	0.00936445	Coding
Tpt1-ps5	4.78986	3.06952	0.864259	3.55162	0.000382864	0.00942821	Noncoding
Btg1	3086.86	-0.395126	0.111286	-3.55056	0.000384414	0.00943971	Coding
AC118476.6	4.20221	-2.50585	0.705804	-3.55035	0.000384725	0.00943971	Noncoding
Mrps16	473.817	0.2916	0.082313	3.54257	0.000396245	0.00970479	Coding
Kif20b	54.7771	0.617248	0.174452	3.53821	0.000402843	0.00983461	Coding
Sf3b6	464.909	0.255601	0.0722422	3.53811	0.000402998	0.00983461	Coding
Rbx1-ps	5.32693	2.80104	0.792164	3.53593	0.000406341	0.00989835	Noncoding
Ccr5	296.09	0.647419	0.183309	3.53184	0.000412686	0.0100349	Coding
Ppdpf	176.549	0.39778	0.112655	3.53096	0.000414056	0.0100501	Coding
Csprs	9.84209	-1.39393	0.395057	-3.52842	0.000418052	0.010129	Coding
Lbr	184.523	0.346015	0.0981582	3.52508	0.000423359	0.0102392	Coding
Gm15795	5.16474	-1.94573	0.552218	-3.52348	0.00042592	0.0102715	Predicted
Snrpd2	697.565	-0.226616	0.0643265	-3.52291	0.000426844	0.0102715	Coding
Timp2	42.8794	-1.09917	0.312015	-3.52283	0.00042697	0.0102715	Coding
AC125206.3	22.4202	-0.937543	0.266241	-3.52141	0.000429265	0.0103085	Noncoding
Aurkaip1	413.573	0.281391	0.0799419	3.51994	0.00043164	0.0103471	Coding
Mthfs	66.0904	-0.52563	0.149543	-3.5149	0.000439913	0.0105139	Coding
Tmc8	40.4011	-0.669172	0.190389	-3.51476	0.000440149	0.0105139	Coding
Pdcd5-ps	9.05085	1.64325	0.467671	3.5137	0.00044191	0.0105374	Noncoding
Rpl21-ps14	6.45159	-1.73239	0.493212	-3.51247	0.000443956	0.0105676	Ribosomal
Gm11517	7.64057	-1.52825	0.436146	-3.50399	0.000458342	0.0108708	Predicted
Pdcd4	398.189	-0.372488	0.106306	-3.50392	0.000458455	0.0108708	Coding
AC121801.1	55.0985	0.696785	0.19888	3.50355	0.000459105	0.0108708	Noncoding
Rab33b	30.2105	-0.763519	0.218046	-3.50165	0.000462389	0.0109295	Coding
Top2a	316.943	0.611572	0.174714	3.50041	0.000464547	0.0109614	Coding
Msrb1	99.1937	0.487397	0.139276	3.49951	0.000466109	0.0109791	Coding
Sfi1	297.855	-0.310741	0.0888094	-3.49897	0.000467057	0.0109823	Coding
Atg101	83.8003	0.473394	0.135326	3.49817	0.000468464	0.0109844	Coding
Rep15	5.50676	-1.74728	0.499509	-3.498	0.000468769	0.0109844	Coding
Npc2	615.302	0.360587	0.103126	3.49656	0.000471305	0.0110248	Coding
Scg5	54.2172	-0.575777	0.164698	-3.49596	0.000472356	0.0110303	Coding
Gm5523	4.57899	3.00591	0.860649	3.4926	0.000478335	0.0111507	Predicted
Gpx4	432.413	0.292468	0.0837682	3.4914	0.000480498	0.0111819	Coding
Tpm3-rs7	823.913	0.254108	0.0728514	3.48804	0.000486584	0.0113041	Coding
Eif3s6-ps1	9.70337	1.70007	0.488044	3.48344	0.00049502	0.0114804	Noncoding
Ms4a6b	1731.42	0.37356	0.107355	3.47967	0.000502029	0.0116231	Coding
Cdk6	384.55	-0.613132	0.17629	-3.47798	0.000505212	0.0116768	Coding
Ankle1	4.94134	3.04584	0.877486	3.4711	0.000518328	0.0119595	Coding
Rnaset2b	7.54332	-1.47745	0.425871	-3.46925	0.00052191	0.0120217	Coding
Hist1h2af	9.38026	-1.60361	0.462366	-3.46828	0.000523805	0.0120443	Coding
Scand1	781.328	0.267503	0.0771383	3.46783	0.00052467	0.0120443	Coding
Sra1	313.428	0.283783	0.0818623	3.46659	0.000527107	0.0120798	Coding
Mrpl58	192.505	0.35417	0.102201	3.46542	0.000529405	0.0121119	Coding
Jade2	60.3891	-0.558925	0.161322	-3.46465	0.00053092	0.012116	Coding
Gm7488	2.13191	3.62548	1.04649	3.46442	0.00053137	0.012116	Predicted
Tcea1	272.949	-0.284733	0.0822359	-3.46239	0.000535401	0.0121731	Coding
Polr2j	253.423	0.305352	0.0881945	3.46225	0.000535674	0.0121731	Coding
Atp5k	819.75	-0.188897	0.0545735	-3.46133	0.000537522	0.0121946	Coding
Atox1	528.334	0.227606	0.065804	3.45885	0.000542481	0.0122866	Coding
Gm8399	8.33323	1.73578	0.502175	3.45652	0.000547193	0.0123705	Predicted
Tusc3	136.1	0.386992	0.111973	3.45612	0.000548014	0.0123705	Coding
Gm45113	2.20346	3.67138	1.06303	3.45369	0.000552975	0.0124617	Predicted
Tab2	217.914	-0.364671	0.105606	-3.45312	0.000554143	0.0124673	Coding
Uqcrh-ps1	2.03012	3.56255	1.03183	3.45265	0.000555103	0.0124682	Noncoding
Hipk1	172.747	-0.392622	0.113743	-3.45182	0.00055682	0.012486	Coding
Gm10123	5.27256	2.69334	0.780699	3.44991	0.000560771	0.0125539	Predicted
Ttc39b	275.685	-0.32228	0.0934392	-3.44909	0.000562482	0.0125656	Coding
Psme2	938.395	0.259009	0.075102	3.44877	0.000563152	0.0125656	Coding
Selenow	1063.92	0.316419	0.0917815	3.44753	0.00056574	0.0125874	Coding
Tmem9b	118.4	0.474435	0.137621	3.44741	0.000565988	0.0125874	Coding
Rpl22-ps1	5.25893	2.71195	0.786792	3.44684	0.000567184	0.0125933	Ribosomal
Fam60a	98.1778	-0.41771	0.12131	-3.44331	0.000574634	0.0127379	Coding
Ap2a2	56.2297	-0.551301	0.160188	-3.44158	0.00057832	0.0127986	Coding
Utrn	144.158	-0.3741	0.108818	-3.43786	0.000586339	0.0129549	Coding
Polr1d	841.357	0.226177	0.0658083	3.43691	0.000588387	0.012979	Coding
Smarce1	128.351	-0.38668	0.112626	-3.43332	0.000596241	0.0131309	Coding
Anapc11	191.727	0.365754	0.106558	3.43244	0.000598184	0.0131523	Coding
Prc1	83.9546	0.621802	0.181536	3.42523	0.000614275	0.0134823	Coding
Hnrnpm	380.428	-0.266968	0.0779508	-3.42483	0.000615185	0.0134823	Coding
D830025C05Rik	22.9331	-0.815666	0.238292	-3.42297	0.000619419	0.0135532	Noncoding
Dpy30	269.839	0.296104	0.0865407	3.42156	0.000622638	0.0136016	Coding
Cdc20	71.2947	1.01567	0.296946	3.4204	0.000625282	0.0136374	Coding
Cdt1	53.1382	0.72137	0.210953	3.41957	0.000627203	0.0136573	Coding
Il7r	402.769	-0.300019	0.0878666	-3.41448	0.000639042	0.0138928	Coding
Sin3b	387.062	0.294713	0.0863496	3.41302	0.000642471	0.0139356	Coding
C330027C09Rik	22.2437	0.945704	0.277108	3.41277	0.000643069	0.0139356	Coding
Rny3	4.26085	-2.14556	0.628768	-3.41233	0.000644107	0.0139358	Noncoding
Atg3	141.917	0.383168	0.112323	3.41129	0.000646552	0.0139663	Coding
Rps12-ps10	6.50626	2.08684	0.611894	3.41046	0.000648525	0.0139732	Ribosomal
Ipcef1	84.4385	-0.527402	0.15465	-3.41029	0.000648934	0.0139732	Coding
Slc16a11	63.6652	-0.87487	0.256627	-3.40911	0.000651744	0.0140115	Coding
Gnb2	749.642	0.216041	0.0634144	3.40681	0.000657277	0.014108	Coding
Dnajc3	233.363	0.346521	0.101973	3.39816	0.000678415	0.0145387	Coding
Gm10698	5.28378	-1.73328	0.51031	-3.39652	0.000682479	0.0146027	Predicted
Wdr47	17.0874	-1.02103	0.300651	-3.39605	0.000683667	0.014605	Coding
Cisd1	185.457	0.337049	0.0993678	3.39193	0.000694023	0.0148029	Coding
Nr2c2	80.6761	-0.465357	0.137273	-3.39002	0.000698885	0.0148832	Coding
Gm5451	2.8146	3.37162	0.995198	3.38788	0.000704345	0.0149758	Predicted
Lepr	6.8386	-2.54115	0.750164	-3.38745	0.000705446	0.0149758	Coding
Pcna	245.784	-0.43209	0.127576	-3.38692	0.000706816	0.0149814	Coding
Dctn3	341.436	0.257971	0.0761884	3.38596	0.000709287	0.0149982	Coding
Arpc3	1453.8	0.193542	0.0571636	3.38576	0.000709825	0.0149982	Coding
Kdm6a	88.7655	-0.432376	0.128024	-3.37731	0.000731994	0.0154035	Coding
Rps23-ps1	234.496	-0.304033	0.0900264	-3.37715	0.000732413	0.0154035	Ribosomal
Zdhhc21	66.5386	-0.495269	0.146653	-3.37715	0.000732419	0.0154035	Coding
Gpx1	246.56	0.326408	0.0966808	3.37615	0.000735089	0.0154357	Coding
Tle4	121.019	-0.445449	0.132001	-3.37459	0.000739245	0.015499	Coding
Nlrc5	113.529	-0.393329	0.116592	-3.37356	0.000742025	0.0155332	Coding
Calm1	2643	0.164594	0.0488508	3.36933	0.000753525	0.0157496	Coding
Ndufab1	345.588	-0.253672	0.0753237	-3.36776	0.000757827	0.0157909	Coding
Gstt3	12.6435	-1.23502	0.366718	-3.36775	0.000757835	0.0157909	Coding
Park7	457.103	0.322326	0.0959206	3.36034	0.000778453	0.0161956	Coding
Bdh2	93.0376	-1.38792	0.413333	-3.35787	0.000785468	0.0163031	Coding
Cd2	788.964	0.624782	0.186076	3.35767	0.000786024	0.0163031	Coding
AC158620.2	6.32679	2.06072	0.613961	3.35643	0.000789565	0.0163515	Noncoding
Uqcrb	759.21	0.238973	0.0712695	3.3531	0.000799123	0.0165242	Coding
Pdcd10	407.001	0.244439	0.072982	3.3493	0.000810151	0.0167076	Coding
Tmem167	573.491	0.222012	0.0662937	3.34891	0.000811292	0.0167076	Coding
Slc28a2	42.38	-0.61399	0.183348	-3.34878	0.000811694	0.0167076	Coding
2410015M20Rik	461.808	0.210916	0.0630269	3.34644	0.000818565	0.0168234	Coding
Mrpl34	150.866	0.366764	0.109654	3.34475	0.000823554	0.0169003	Coding
Mien1	309.142	0.281197	0.0841278	3.3425	0.000830285	0.0170127	Coding
Pole2	28.8715	-0.791426	0.236881	-3.34103	0.000834675	0.0170652	Coding
Atp5c1	1150.8	0.169965	0.0508755	3.3408	0.000835367	0.0170652	Coding
Taf10	737.139	0.183937	0.0550669	3.34024	0.000837053	0.0170739	Coding
Rasgrp2	38.7203	1.35603	0.406082	3.3393	0.000839899	0.0171062	Coding
Bax	474.694	0.314676	0.0942562	3.33852	0.000842262	0.0171285	Coding
Arhgap11a	35.5241	0.705112	0.211379	3.33577	0.000850646	0.0172731	Coding
Gm11975	8.66577	-1.44921	0.434901	-3.33228	0.000861384	0.017465	Predicted
Mir142hg	79.5545	-0.980739	0.294512	-3.33005	0.0008683	0.0175789	Noncoding
Ndufc2	421.399	0.237273	0.0712797	3.32877	0.000872319	0.0176339	Coding
Snrpd3	355.034	0.339771	0.102285	3.32179	0.000894411	0.0180535	Coding
Cbx3	650.615	-0.257761	0.0776096	-3.32126	0.000896122	0.0180611	Coding
Phf11d	4.80588	3.0155	0.908087	3.32071	0.000897872	0.0180695	Coding
Cep55	47.3629	0.648841	0.195672	3.31597	0.000913272	0.0183522	Coding
Rps27a-ps2	7.98124	1.74651	0.527142	3.31317	0.000922445	0.018509	Ribosomal
Atp1a1	276.615	-0.274629	0.0830376	-3.30728	0.000942057	0.0188746	Coding
Zmiz1	149.056	-0.415726	0.125789	-3.30493	0.00094999	0.0190054	Coding
Tnrc6b	203.301	-0.345279	0.10451	-3.3038	0.000953833	0.0190542	Coding
Golm1	46.4326	-0.587745	0.17817	-3.29879	0.000971016	0.0193241	Coding
Gapdh	6829.01	0.204726	0.0620612	3.29878	0.000971061	0.0193241	Coding
Cox7c	2006.96	-0.165584	0.050198	-3.29862	0.000971625	0.0193241	Coding
6820431F20Rik	333.152	-0.26461	0.0802485	-3.29738	0.000975897	0.0193739	Noncoding
Cdc42	1711.4	0.183147	0.0555486	3.29707	0.000976993	0.0193739	Coding
Ywhaz	721.129	-0.171901	0.0521574	-3.29581	0.000981398	0.0194328	Coding
Incenp	91.5985	0.476985	0.144769	3.2948	0.000984904	0.0194651	Coding
Pdgfb	26.6938	-0.937883	0.28468	-3.29452	0.000985903	0.0194651	Coding
2310031A07Rik	26.7471	1.28896	0.391328	3.29382	0.000988369	0.0194854	Noncoding
Stk24	308.076	-0.284905	0.086529	-3.29259	0.000992685	0.0195421	Coding
Tmbim1	58.6033	-0.674353	0.204844	-3.29203	0.000994663	0.0195526	Coding
Timm23	11.1404	-1.33929	0.406901	-3.29144	0.00099676	0.0195654	Coding
Taf5	25.2878	0.844494	0.257007	3.28588	0.00101663	0.0199265	Coding
Hist3h2ba	25.6101	0.853074	0.259955	3.28163	0.0010321	0.0201727	Coding
Selenoh	353.821	0.364678	0.111128	3.28161	0.00103217	0.0201727	Coding
Abhd2	93.8876	-0.420132	0.128051	-3.28098	0.00103447	0.0201886	Coding
Mad2l1	74.4213	0.547035	0.166762	3.28034	0.00103682	0.0202044	Coding
Cox4i1	2645.62	0.159278	0.0485628	3.27983	0.0010387	0.0202044	Coding
Mbnl1	1221.29	-0.190858	0.0582098	-3.27879	0.00104253	0.0202044	Coding
Rpl4	4102.6	-0.128074	0.039062	-3.27874	0.00104272	0.0202044	Ribosomal
Grpel1	195.658	0.310259	0.0946278	3.27873	0.00104274	0.0202044	Coding
1700019D03Rik	18.4473	-1.19808	0.365622	-3.27684	0.00104977	0.0203115	Coding
Anp32e	333.926	0.351981	0.107432	3.27631	0.00105173	0.0203205	Coding
Wisp1	84.7135	-0.889124	0.271585	-3.27384	0.00106098	0.0204537	Coding
Gm12693	6.38344	2.17339	0.663904	3.27366	0.00106165	0.0204537	Predicted
Pum2	218.392	-0.314279	0.0960188	-3.2731	0.00106374	0.0204635	Coding
Gm10012	25.5499	-0.876715	0.267886	-3.27272	0.00106518	0.0204635	Predicted
Tmsb15b1	33.8118	-0.709277	0.216753	-3.27228	0.00106683	0.0204663	Coding
A530083M17Rik	35.0476	-0.787764	0.240978	-3.26903	0.00107915	0.0206733	Noncoding
Gm4316	97.7719	-0.458669	0.140346	-3.26814	0.00108256	0.0207094	Predicted
Tpx2	80.3532	0.575699	0.176364	3.26428	0.00109744	0.0209643	Coding
Ndufb6	333.725	0.253492	0.0776699	3.26371	0.00109963	0.0209766	Coding
Celf2	639.081	-0.193542	0.059342	-3.26147	0.00110835	0.0211132	Coding
Alkbh8	37.7051	-0.64222	0.197023	-3.25961	0.00111564	0.0212223	Coding
Gm43413	18.8207	-1.02089	0.313524	-3.25616	0.00112929	0.0214265	Predicted
Psmb2	528.646	0.265913	0.0816661	3.2561	0.00112954	0.0214265	Coding
Lat	645.859	0.378712	0.116536	3.24974	0.00115512	0.021881	Coding
Pglyrp2	46.3749	0.683539	0.210465	3.24775	0.00116321	0.021983	Coding
Gm14017	1.82032	3.39955	1.04678	3.24762	0.00116375	0.021983	Predicted
Mxd3	23.245	1.15084	0.354524	3.24617	0.00116969	0.0220645	Coding
Impdh2-ps	6.26467	2.1966	0.676863	3.24526	0.00117343	0.0221021	Noncoding
Ak6	76.4573	0.483339	0.148954	3.24489	0.00117495	0.0221021	Coding
Tmem181b-ps	21.5856	-0.857732	0.264573	-3.24195	0.00118715	0.0223007	Noncoding
Fam160b2	23.3774	-0.868401	0.26797	-3.24067	0.0011925	0.022353	Coding
Gm45733	2.11504	-2.97153	0.917001	-3.24049	0.00119324	0.022353	Predicted
Pou2f2	203.871	-0.587345	0.181391	-3.238	0.00120371	0.0225179	Coding
Camta2	28.7962	-0.706534	0.218245	-3.23735	0.00120647	0.0225216	Coding
Gm44292	64.1739	-0.752471	0.232447	-3.23717	0.00120723	0.0225216	Predicted
Cuta	295.831	0.257139	0.0795016	3.23438	0.00121905	0.022711	Coding
Mink1	68.7498	-0.554673	0.171705	-3.23039	0.00123622	0.0229991	Coding
Rpl9-ps7	2.80704	3.34441	1.03553	3.22966	0.00123935	0.0230258	Ribosomal
Prf1	1394.71	0.567213	0.175775	3.22693	0.00125127	0.0232028	Coding
Rpsa-ps5	1.79125	3.36909	1.04413	3.22669	0.00125231	0.0232028	Noncoding
Atp9a	20.5147	-0.878239	0.272335	-3.22484	0.00126041	0.0233135	Coding
Bmpr2	39.0569	-0.812131	0.251859	-3.22455	0.00126172	0.0233135	Coding
AA467197	197.976	0.614143	0.190518	3.22354	0.00126618	0.0233598	Coding
Gm37638	2.22855	-2.92327	0.906948	-3.2232	0.00126768	0.0233598	Predicted
Rpl6	8671.78	-0.11579	0.0359595	-3.22001	0.00128187	0.0235745	Ribosomal
Kif22	31.1872	0.797662	0.247737	3.2198	0.00128281	0.0235745	Coding
Itpr1	81.4679	-0.52126	0.162049	-3.21669	0.00129681	0.0237961	Coding
Ube2d3	992.726	0.165833	0.0515678	3.21582	0.00130071	0.0237961	Coding
Gm12989	1.91589	3.44542	1.07145	3.21566	0.00130146	0.0237961	Predicted
Polr2d	81.8812	0.454745	0.14142	3.21556	0.0013019	0.0237961	Coding
Gdpd5	15.8172	-0.997612	0.310528	-3.21263	0.00131525	0.0240078	Coding
Hdac1	146.564	0.42152	0.131351	3.2091	0.0013315	0.0242716	Coding
Atp5f1	1163.25	0.178411	0.0556329	3.20693	0.00134159	0.0244227	Coding
Dek	621.605	0.229306	0.071515	3.20641	0.00134404	0.0244344	Coding
Gm37070	12.9064	-1.33103	0.415259	-3.2053	0.00134924	0.0244702	Predicted
Supt4a	572.68	0.300828	0.0938557	3.20521	0.00134962	0.0244702	Coding
Tubb5	1662.17	0.423968	0.132357	3.20323	0.00135898	0.0246069	Coding
Lsm1	149.3	0.344568	0.107609	3.20202	0.00136466	0.0246769	Coding
Cdca8	112.623	0.785603	0.245485	3.20021	0.00137326	0.024768	Coding
Tgtp1	9.80778	-1.45932	0.456012	-3.20019	0.00137336	0.024768	Coding
D630039A03Rik	20.7409	-0.881446	0.275756	-3.19647	0.0013912	0.025056	Coding
Plk1	24.2388	0.916276	0.286686	3.19609	0.00139303	0.025056	Coding
Med14	90.1244	-0.447523	0.140041	-3.19566	0.00139512	0.0250603	Coding
Gm6977	4.57838	2.80232	0.878792	3.18883	0.00142848	0.0256255	Predicted
Gm10320	7.62308	1.63321	0.51355	3.18024	0.00147154	0.0263631	Predicted
Herc2	73.3813	-0.457355	0.143997	-3.17615	0.00149244	0.0267022	Coding
Cox8a	3137.32	0.195007	0.0614827	3.17174	0.00151528	0.0270471	Coding
Acss1	32.6952	-0.715178	0.22549	-3.17166	0.00151571	0.0270471	Coding
Rpsa-ps4	2.48052	3.17559	1.00227	3.16841	0.00153277	0.0273155	Noncoding
B230307C23Rik	21.9188	0.878021	0.277296	3.16636	0.00154359	0.0274445	Coding
Ddx5	2085.31	-0.149949	0.0473584	-3.16627	0.00154406	0.0274445	Coding
Selenok	635.267	0.25094	0.0793006	3.16442	0.00155395	0.0275841	Coding
Faah	52.1325	-0.666255	0.210584	-3.16385	0.00155696	0.0276013	Coding
Ttk	12.6931	1.29757	0.410254	3.16284	0.00156237	0.0276612	Coding
Bub3	285.145	0.310659	0.0982467	3.16203	0.00156675	0.0277024	Coding
Gm43684	5.14107	-1.63507	0.517683	-3.15844	0.00158614	0.0280087	Predicted
Oaz1	3011.18	0.160612	0.0508969	3.15565	0.00160143	0.0282419	Coding
Cenpk	27.6537	0.832217	0.263802	3.15471	0.0016066	0.0282963	Coding
Gm7990	4.71513	-1.75533	0.556698	-3.15311	0.00161543	0.0284148	Predicted
Tmsb4x	70495.6	0.236816	0.0751517	3.15117	0.00162616	0.0285665	Coding
Foxp4	42.1904	-0.573035	0.182009	-3.14838	0.00164179	0.0288036	Coding
Mib1	46.2984	-0.595287	0.189203	-3.14629	0.00165356	0.0289703	Coding
Gm12778	20.2818	-0.876217	0.278553	-3.14561	0.00165742	0.0289703	Predicted
Cenpp	21.6424	0.885039	0.281361	3.14556	0.00165771	0.0289703	Coding
Psmb8	2445.07	0.140874	0.0447908	3.14514	0.00166006	0.028974	Coding
Rps6-ps2	7.78934	-1.29689	0.412411	-3.14464	0.00166289	0.0289861	Ribosomal
Emg1	480.244	0.245461	0.0780816	3.14365	0.00166854	0.0290472	Coding
Arl4d	63.4491	-0.773146	0.246021	-3.1426	0.00167455	0.0291144	Coding
Ide	123.405	-0.359867	0.114538	-3.14189	0.00167861	0.0291476	Coding
Gm8909	12.7349	-1.01664	0.323708	-3.14061	0.00168598	0.0292381	Predicted
Gm43820	10.4664	-1.18708	0.378221	-3.13859	0.0016976	0.029402	Predicted
Gm37065	2.39018	-2.55281	0.8137	-3.13729	0.00170518	0.0294954	Predicted
Pmepa1	288.243	-0.425844	0.135781	-3.13626	0.00171118	0.0295615	Coding
Imp3	206.88	0.29394	0.0938085	3.13341	0.0017279	0.0298124	Coding
Chmp4b	534.479	-0.199739	0.0637618	-3.13258	0.00173275	0.0298579	Coding
Gimap9	214.587	0.362685	0.115889	3.1296	0.00175044	0.0301245	Coding
Gm12231	1.8239	3.38894	1.08364	3.12737	0.00176379	0.0303157	Predicted
Dctpp1	188.697	0.355598	0.113889	3.12232	0.00179429	0.0308009	Coding
Srsf5	494.449	-0.220566	0.07065	-3.12195	0.00179657	0.030801	Coding
Gm8885	10.1226	-1.27001	0.407296	-3.11814	0.00181995	0.0311606	Predicted
Ccdc17	5.27044	-1.62213	0.52031	-3.11762	0.00182319	0.0311606	Coding
Kmt2a	272.364	-0.256604	0.0823152	-3.11733	0.00182499	0.0311606	Coding
Gm6594	2.47033	3.17589	1.01888	3.11704	0.00182675	0.0311606	Predicted
Ubr5	119.949	-0.429321	0.137771	-3.11619	0.00183206	0.0312118	Coding
Clic4	110.849	-0.394103	0.12652	-3.11496	0.00183973	0.0313031	Coding
Romo1	360.459	-0.234047	0.0752118	-3.11183	0.00185929	0.0315952	Coding
D8Ertd738e	588.496	0.248112	0.07975	3.11112	0.00186377	0.0315952	Coding
Gm6793	8.15621	-1.37539	0.442092	-3.1111	0.00186389	0.0315952	Predicted
Cnot3	87.502	-0.409408	0.131654	-3.10972	0.00187262	0.0317035	Coding
Srgn	4199.12	0.230599	0.0741631	3.10935	0.001875	0.0317042	Coding
2310001H17Rik	111.113	-0.486572	0.156533	-3.10843	0.00188083	0.0317631	Noncoding
Gm45509	17.7014	-1.26043	0.405557	-3.10791	0.00188415	0.0317795	Predicted
Phkg1	4.52022	-2.43401	0.783362	-3.10714	0.00188908	0.0317939	Coding
Sorl1	137.893	-0.34187	0.110031	-3.10704	0.0018897	0.0317939	Coding
Rps4x-ps	4.1204	2.7301	0.879467	3.10427	0.00190749	0.0320534	Ribosomal
Tmed10	296.838	0.264913	0.0854466	3.10033	0.00193307	0.0323822	Coding
Rrm1	119.587	0.409319	0.132031	3.10017	0.00193412	0.0323822	Coding
Tpr	559.708	0.183963	0.0593402	3.10015	0.00193423	0.0323822	Coding
Dgkd	85.8289	-0.430252	0.138879	-3.09803	0.0019481	0.0325742	Coding
Hacd2	160.096	-0.424103	0.136987	-3.09594	0.00196188	0.0327292	Coding
Nudcd2	172.268	0.357888	0.115601	3.09589	0.00196221	0.0327292	Coding
BTF3L4	6.28321	-1.49803	0.484194	-3.09386	0.00197569	0.0328936	Coding
Slc13a3	6.9299	2.19409	0.709217	3.09368	0.00197692	0.0328936	Coding
Dbf4	91.3447	0.398615	0.128878	3.09298	0.00198158	0.0329307	Coding
Ikzf4	59.591	-0.546779	0.177003	-3.08909	0.0020077	0.0333239	Coding
Zcchc7	214.283	-0.283634	0.0918493	-3.08803	0.00201485	0.0333624	Coding
Actn4	311.187	-0.275779	0.0893061	-3.08802	0.00201495	0.0333624	Coding
Pfkp	348.963	0.301394	0.0978216	3.08106	0.00206268	0.0341111	Coding
Sec61b	1322.28	0.145945	0.0473862	3.0799	0.00207073	0.0342024	Coding
Mbd2	603.036	0.179033	0.0581501	3.0788	0.00207835	0.0342864	Coding
Nudc-ps1	5.13513	2.27333	0.73864	3.07772	0.00208588	0.0343687	Noncoding
Gm7206	2.35045	3.11298	1.01194	3.07626	0.00209618	0.0344777	Predicted
AC153368.1	59.6997	-0.522795	0.169956	-3.07606	0.00209758	0.0344777	Noncoding
Sub1	2699.73	0.285701	0.0931032	3.06865	0.00215026	0.0353008	Coding
Rps15a-ps4	9.02272	1.42081	0.463449	3.06573	0.00217136	0.035604	Ribosomal
CT010506.1	11.7409	1.18357	0.386296	3.06389	0.00218482	0.0357814	Noncoding
Aspm	21.3376	1.04308	0.340568	3.06276	0.00219308	0.0358733	Coding
Spcs1	429.412	0.21851	0.0713855	3.06099	0.00220609	0.0360426	Coding
Mrps15	189.488	0.318273	0.104015	3.05988	0.00221427	0.036103	Coding
Olfr482	12.5386	-0.95351	0.31163	-3.05975	0.00221521	0.036103	Coding
Ndufv2	332.106	0.252716	0.082603	3.0594	0.00221779	0.036103	Coding
Slc7a14	4.40182	-1.70271	0.556663	-3.05878	0.00222242	0.036135	Coding
E130208F15Rik	8.26889	-1.32247	0.43252	-3.05759	0.00223123	0.0362347	Coding
Rps26	9577.59	-0.138013	0.0451461	-3.05703	0.0022354	0.0362589	Ribosomal
Rps6ka3	117.555	-0.41967	0.137326	-3.05601	0.00224301	0.0363389	Ribosomal
Ppp2r3c	61.3698	-0.458396	0.150045	-3.05507	0.0022501	0.0364103	Coding
Fam174b	21.9555	-0.809739	0.265188	-3.05345	0.00226227	0.0365635	Coding
Igfbp7	153.828	-0.809771	0.265407	-3.05106	0.00228036	0.0368119	Coding
Sap18	344.108	0.224219	0.073515	3.04997	0.00228863	0.0369014	Coding
St6galnac6	14.8552	-0.957776	0.314173	-3.04856	0.00229937	0.0370306	Coding
Psma3	726.419	0.201196	0.0660564	3.04582	0.00232043	0.0372936	Coding
Gm6451	5.44699	2.07441	0.68109	3.04572	0.00232121	0.0372936	Predicted
Gm25636	5.58685	-1.67968	0.551798	-3.04401	0.00233444	0.0374617	Predicted
Hist1h1c	239.717	0.415675	0.136649	3.04191	0.00235084	0.0376265	Coding
Gtf2a1	49.7583	-0.5049	0.165983	-3.04188	0.00235106	0.0376265	Coding
Smc4	496.302	0.243663	0.0801094	3.04163	0.00235305	0.0376265	Coding
Dnaja1	977.195	-0.367412	0.120832	-3.04069	0.00236035	0.0376988	Coding
Cenpe	72.0592	0.767843	0.252696	3.03861	0.00237674	0.0379158	Coding
1500004A13Rik	18.8355	-1.69281	0.557197	-3.03809	0.00238083	0.0379365	Noncoding
Rps12-ps3	3.23616	2.91924	0.96132	3.0367	0.00239183	0.038067	Ribosomal
Gm3511	10.4575	-1.09465	0.360584	-3.03577	0.0023992	0.0381013	Predicted
Cox7a2	1393.66	0.177391	0.0584349	3.0357	0.00239976	0.0381013	Coding
Tubb4b	344.554	0.5054	0.166504	3.03537	0.00240243	0.0381013	Coding
Katnb1	33.7369	0.654603	0.215714	3.03459	0.00240866	0.0381555	Coding
Coa3	188.333	0.289212	0.095356	3.03297	0.00242162	0.0383159	Coding
Prdx6	585.712	0.18443	0.0608265	3.03207	0.00242886	0.0383553	Coding
Ndufb7	803.802	0.186794	0.0616085	3.03195	0.00242977	0.0383553	Coding
Gm21596	14.9729	-0.950992	0.31373	-3.03125	0.00243547	0.0384005	Predicted
Chchd2	1704.88	0.152488	0.0503872	3.02632	0.00247549	0.0389182	Coding
Lamtor1	232.86	0.276904	0.0915104	3.02593	0.00247871	0.0389182	Coding
Rmnd5a	89.0297	-0.409913	0.135478	-3.02567	0.00248082	0.0389182	Coding
Dnajb11	279.002	0.264846	0.0875393	3.02545	0.00248263	0.0389182	Coding
Sdhb	341.534	0.234544	0.0775238	3.02545	0.00248267	0.0389182	Coding
Gm8213	25.4064	-0.741008	0.244972	-3.02486	0.00248747	0.0389452	Predicted
Rps15a-ps3	18.9837	0.931707	0.30805	3.02454	0.00249015	0.0389452	Ribosomal
Msantd4	35.6796	-0.65756	0.217533	-3.02281	0.0025044	0.039123	Coding
Hdac7	102.4	-0.421189	0.139376	-3.02196	0.00251144	0.0391877	Coding
Ddx39	251.945	0.379516	0.125729	3.01853	0.00254003	0.0395883	Coding
Mir6236	60.3274	-0.553385	0.183449	-3.01655	0.00255665	0.0397602	Noncoding
Gm16060	6.0922	-1.55195	0.514484	-3.01652	0.00255694	0.0397602	Predicted
AC171206.4	19.8453	-0.8434	0.279646	-3.01596	0.00256169	0.0397766	Noncoding
Runx3	608.856	-0.333257	0.110507	-3.0157	0.00256386	0.0397766	Coding
Strbp	67.195	-0.572491	0.189918	-3.01441	0.00257481	0.0399007	Coding
Ncoa3	69.7818	-0.448663	0.14889	-3.01337	0.0025836	0.0399912	Coding
Gm27956	2.44323	-2.39285	0.79427	-3.01265	0.00258979	0.0400412	Predicted
Gm13166	2.63708	-3.03389	1.00768	-3.01076	0.00260597	0.0402454	Predicted
Rap1b	856.832	0.266943	0.088777	3.00689	0.00263931	0.040714	Coding
Gm37678	4.83312	-1.67779	0.558294	-3.00521	0.00265397	0.0408935	Predicted
Lst1	48.4113	-0.579537	0.192893	-3.00445	0.00266059	0.0409489	Coding
AC159818.1	2.43713	3.11458	1.03705	3.0033	0.00267069	0.0410577	Noncoding
Ms4a4b	3857.56	0.361094	0.120359	3.00014	0.00269859	0.0414395	Coding
Gm12669	2.26131	3.04381	1.01526	2.99807	0.00271694	0.041633	Predicted
Dusp6	106.291	-0.375895	0.125393	-2.99773	0.00271996	0.041633	Coding
Pacsin1	40.5796	-0.687562	0.229364	-2.99768	0.00272041	0.041633	Coding
Mthfd2	158.747	0.343393	0.114681	2.99433	0.00275049	0.0420459	Coding
Npm3-ps1	1.59408	3.19599	1.068	2.99249	0.00276716	0.042253	Noncoding
Tax1bp1	443.286	0.265665	0.0887892	2.99209	0.00277077	0.0422605	Coding
Nxt1	111.445	0.36597	0.122362	2.99088	0.00278175	0.0423803	Coding
Rassf2	40.1379	-0.55796	0.186604	-2.99008	0.00278907	0.042444	Coding
Pde4a	16.8426	-1.0519	0.351997	-2.98837	0.00280469	0.0426338	Coding
Gm7658	207.667	0.287456	0.0962523	2.98649	0.00282204	0.0428494	Predicted
Gm3550	24.0774	-0.743899	0.249187	-2.98531	0.00283292	0.0429029	Predicted
Kif4	24.2546	0.961399	0.322048	2.98527	0.00283329	0.0429029	Coding
Dazap1	256.284	0.261961	0.0877568	2.98508	0.00283506	0.0429029	Coding
Dync1h1	83.1403	-0.399005	0.133715	-2.98399	0.00284514	0.0430074	Coding
Tonsl	388.283	0.236026	0.0791405	2.98236	0.00286031	0.0431885	Coding
Leprotl1	425.045	0.200278	0.0671724	2.98156	0.00286787	0.0432544	Coding
Gm5436	2.43816	3.06761	1.02975	2.979	0.00289194	0.043569	Predicted
Rpl21-ps7	5.98616	-1.55881	0.523414	-2.97816	0.00289986	0.0436396	Ribosomal
Tyms	132.767	0.498131	0.167312	2.97726	0.00290833	0.0436738	Coding
C130026I21Rik	31.0131	-0.728156	0.244574	-2.97724	0.00290858	0.0436738	Coding
Gng2	537.38	0.341607	0.114757	2.97679	0.0029128	0.0436888	Coding
Hmgb1	1239.06	-0.231963	0.0779594	-2.97544	0.00292571	0.0438119	Coding
Gm7418	5.35145	-1.49432	0.5023	-2.97496	0.00293031	0.0438119	Predicted
Dcun1d1	88.2003	-0.38666	0.129973	-2.97491	0.00293071	0.0438119	Coding
Twistnb	138.047	0.389191	0.130902	2.97315	0.0029476	0.0440158	Coding
Gm20634	16.3717	-1.07749	0.362655	-2.97112	0.00296716	0.0442591	Predicted
Hnrnpl	270.094	-0.274929	0.0926236	-2.96824	0.00299507	0.0446073	Coding
Il12rb1	36.283	0.671574	0.226288	2.96779	0.00299952	0.0446073	Coding
CT025600.2	13.024	-1.69884	0.572457	-2.96763	0.00300104	0.0446073	Noncoding
Uchl3	145.138	0.355102	0.119669	2.96736	0.00300368	0.0446073	Coding
Il2rg	481.674	-0.225691	0.0760709	-2.96685	0.00300868	0.0446327	Coding
Ssr2	281.708	0.260901	0.0879673	2.96589	0.00301813	0.0447237	Coding
Tspo	1021.82	0.189181	0.0638339	2.96364	0.00304021	0.0450017	Coding
Itm2b	1660.39	0.335771	0.113319	2.96305	0.00304605	0.0450022	Coding
Haus4	61.5556	0.502383	0.169554	2.96297	0.00304689	0.0450022	Coding
Kif13b	52.2936	-0.511305	0.172697	-2.9607	0.00306939	0.0452743	Coding
Ctcf	271.642	0.26125	0.088247	2.96044	0.00307199	0.0452743	Coding
Klrc1	2006.24	-0.349062	0.11797	-2.95891	0.00308733	0.0454508	Coding
Faap20	97.2663	0.380534	0.12882	2.95399	0.00313691	0.0461307	Coding
Txndc9	155.533	0.304747	0.103218	2.95246	0.00315249	0.0462811	Coding
Mt3	31.1537	1.18245	0.400515	2.95232	0.00315398	0.0462811	Coding
Morf4l1	708.472	-0.17581	0.0595622	-2.9517	0.00316031	0.0463239	Coding
Zc3h7b	31.6308	-0.700213	0.237298	-2.95077	0.00316982	0.046413	Coding
Gm24576	3.59167	-2.03038	0.688302	-2.94984	0.00317943	0.0465035	Predicted
Smarcad1	65.5934	0.467958	0.158661	2.94942	0.00318371	0.0465158	Coding
Gm9311	2.55656	-2.28604	0.77518	-2.94904	0.00318762	0.0465228	Predicted
Gm9844	180.762	-0.355832	0.120917	-2.94279	0.00325268	0.0474212	Predicted
Ubxn7	50.1609	-0.51456	0.174966	-2.94091	0.0032725	0.0476589	Coding
Gm12218	3.26315	-2.11231	0.719797	-2.9346	0.00333983	0.0485872	Predicted
Atp6v1f	804.009	0.191649	0.0653472	2.93278	0.00335945	0.0488202	Coding
Chpf2	31.083	-0.644191	0.219704	-2.93208	0.00336698	0.0488771	Coding
Gm8172	7.92009	-1.2539	0.428101	-2.929	0.00340059	0.0493122	Predicted
Gm6344	9.81422	-1.09002	0.372467	-2.92649	0.00342812	0.0496582	Predicted
Rpl31-ps1	2.39483	3.00147	1.02671	2.92339	0.00346248	0.0501024	Ribosomal
Leng8	142.796	-0.325129	0.111313	-2.92085	0.00349083	0.0504587	Coding
Trav3-3	4.47994	-1.72294	0.59023	-2.91909	0.00351051	0.050689	Coding
Prim1	58.3628	0.506578	0.17373	2.9159	0.00354666	0.0511565	Coding
Ftl1-ps1	19.7165	-0.917829	0.314883	-2.91482	0.00355892	0.0512681	Coding
Hist1h2bk	6.98906	-1.95059	0.66936	-2.91411	0.00356706	0.0512681	Coding
CT030249.1	16.4986	-0.859394	0.294938	-2.91381	0.00357047	0.0512681	Noncoding
Mum1	59.9242	-0.441922	0.151675	-2.91361	0.00357273	0.0512681	Coding
Magoh	406.488	0.21947	0.0753272	2.91356	0.00357333	0.0512681	Coding
mt-Tv	1.79799	-3.58579	1.23103	-2.91284	0.00358153	0.0513315	Mitochondrial
Mrps34	130.647	0.329702	0.113224	2.91194	0.0035919	0.0514257	Coding
Rheb	250.796	0.251713	0.0864675	2.91108	0.00360185	0.0515137	Coding
Ccl4	7315.64	1.06394	0.365572	2.91035	0.00361021	0.0515788	Coding
Rpl10a	5602.31	-0.175533	0.0603953	-2.90639	0.00365622	0.052159	Ribosomal
Cenph	35.5485	0.754819	0.259728	2.9062	0.00365853	0.052159	Coding
Trav3-4	1.97886	-4.23339	1.45842	-2.90273	0.00369925	0.0526841	Coding
Ebp	234.359	0.266836	0.0919658	2.90147	0.00371415	0.0528409	Coding
Igtp	320.467	0.438062	0.151097	2.89922	0.00374093	0.053166	Coding
Dhfr	66.4255	0.579783	0.200033	2.89844	0.00375027	0.0532429	Coding
Gm12338	8.89493	1.34027	0.462673	2.89681	0.00376981	0.0534641	Predicted
Eme1	8.72729	1.42359	0.491641	2.89558	0.00378454	0.053617	Coding
Cnih4	168.543	0.303383	0.104886	2.89251	0.00382176	0.0540877	Coding
Gm26799	4.03113	-1.8435	0.637545	-2.89156	0.00383337	0.0541953	Predicted
Wdr33	61.7043	0.463694	0.160422	2.89047	0.00384669	0.054327	Coding
Snhg8	345.241	-0.261557	0.090504	-2.89	0.00385242	0.0543493	Noncoding
Slc5a3	137.218	-0.48126	0.166544	-2.88968	0.00385629	0.0543493	Coding
Gm12466	18.1016	-0.786252	0.272137	-2.88918	0.00386253	0.0543806	Predicted
Synpo	13.6931	-1.06359	0.368204	-2.8886	0.00386963	0.0544239	Coding
Gm43361	31.7995	-0.6264	0.217029	-2.88625	0.00389859	0.0547743	Predicted
Ptbp3	562.632	-0.184316	0.0638974	-2.88457	0.00391951	0.0550113	Coding
Nfkb1	224.561	-0.359072	0.124519	-2.88367	0.00393065	0.0551104	Coding
Ceacam1	1.52271	3.13137	1.08658	2.88186	0.00395339	0.055372	Coding
Gm2a	169.067	-0.38591	0.134006	-2.8798	0.00397933	0.0556777	Coding
Frat2	27.1455	1.09318	0.379736	2.87879	0.003992	0.0557974	Coding
Rpl13	12707.8	-0.154091	0.0535415	-2.87798	0.00400231	0.0558838	Ribosomal
Selenom	13.9557	1.10326	0.383589	2.87616	0.00402546	0.0561443	Coding
Gm17477	8.7925	-1.17787	0.409572	-2.87586	0.00402926	0.0561443	Predicted
Ran	1500.52	0.289669	0.10075	2.87514	0.00403853	0.0562156	Coding
Tk1	107.44	0.415165	0.144468	2.87376	0.0040562	0.0564037	Coding
Actg1	11599.2	0.217172	0.0756731	2.86987	0.00410635	0.0570125	Coding
Spry2	106.665	-0.607203	0.211601	-2.86957	0.00411035	0.0570125	Coding
Epsti1	407.405	0.43768	0.152534	2.86939	0.00411261	0.0570125	Coding
Eno1	1641.22	0.309988	0.108064	2.86856	0.0041235	0.0570666	Coding
Wdr89	410.099	-0.228395	0.0796232	-2.86845	0.00412494	0.0570666	Coding
Havcr2	303.711	0.664501	0.231709	2.86782	0.00413306	0.0571205	Coding
Gm11263	19.9042	-0.758736	0.264629	-2.86717	0.00414163	0.0571807	Predicted
Hivep1	62.9664	-0.450643	0.157226	-2.86622	0.00415404	0.0572935	Coding
Anp32b	1111.59	0.204401	0.071357	2.86448	0.00417688	0.0575343	Coding
Shcbp1	34.2879	0.679579	0.237307	2.86372	0.00418704	0.0575343	Coding
Yme1l1	149.012	-0.293558	0.10251	-2.86371	0.00418713	0.0575343	Coding
Csk	272.603	-0.248526	0.0867876	-2.86361	0.00418848	0.0575343	Coding
Gm42702	7.20064	-1.28375	0.448552	-2.86199	0.00420995	0.0577706	Predicted
Gm5835	7.57909	1.50945	0.527492	2.86157	0.0042155	0.057772	Predicted
Memo1	85.7058	0.414694	0.14493	2.86134	0.00421859	0.057772	Coding
Timm8b	210.907	0.274793	0.0961161	2.85897	0.00425021	0.0581037	Coding
Gm6206	4.98076	-1.52219	0.532441	-2.85888	0.00425139	0.0581037	Predicted
Pkmyt1	19.9202	0.883699	0.309221	2.85782	0.0042656	0.0581951	Coding
Trir	495.91	0.187856	0.0657358	2.85774	0.00426667	0.0581951	Coding
Smpd4	26.6862	0.990831	0.347065	2.85489	0.00430521	0.0586569	Coding
Gm44694	186.988	-0.303889	0.106456	-2.85459	0.00430919	0.0586569	Predicted
Gpm6b	153.016	-0.595323	0.208668	-2.85297	0.00433127	0.0588983	Coding
Ppia	7522.85	0.135555	0.0475308	2.85195	0.00434524	0.059029	Coding
Birc6	223.841	-0.254868	0.0893874	-2.85127	0.00435445	0.0590949	Coding
Nr4a2	677.926	-0.247279	0.08691	-2.84523	0.00443796	0.0601679	Coding
Bag1	520.596	0.196176	0.0690026	2.84302	0.00446889	0.0605266	Coding
Mrps24	398.893	0.21227	0.0746812	2.84234	0.00447833	0.060592	Coding
AI413582	76.1509	0.434556	0.152906	2.84198	0.0044835	0.060592	Coding
Chchd1	253.306	0.283323	0.0997199	2.84119	0.00449453	0.060592	Coding
Med6	25.5791	0.837031	0.294608	2.84117	0.00449485	0.060592	Coding
Acaa1a	73.7271	-0.413638	0.145592	-2.84108	0.00449609	0.060592	Coding
Gm42726	7.84937	-1.51737	0.53425	-2.84018	0.00450875	0.0607024	Predicted
Kif2c	16.771	0.92543	0.326025	2.83853	0.00453224	0.0609307	Coding
Gm8752	10.7556	-1.09868	0.387085	-2.83835	0.00453471	0.0609307	Predicted
D17Wsu92e	87.9823	-0.395549	0.139397	-2.83756	0.00454597	0.0610214	Coding
Ccng1	153.769	0.494603	0.174351	2.83682	0.00455649	0.061102	Coding
Abi1	203.397	-0.290687	0.102546	-2.8347	0.00458683	0.0614481	Coding
Gm6170	1.46735	3.0414	1.0736	2.83288	0.00461302	0.0617379	Predicted
Sema4c	42.5616	-0.764815	0.270113	-2.83146	0.00463354	0.0619513	Coding
Map1lc3b	561.708	0.253151	0.0894831	2.82904	0.00466878	0.0623609	Coding
L2hgdh	12.6608	-0.930525	0.328979	-2.82853	0.00467629	0.0623996	Coding
Diaph3	35.9674	0.58044	0.205247	2.82801	0.00468379	0.0624374	Coding
Clcn7	8.56954	-1.1226	0.397002	-2.8277	0.00468834	0.0624374	Coding
Arrdc4	33.4183	-0.621824	0.220088	-2.82535	0.00472297	0.0628368	Coding
Myl6	4210.03	0.168168	0.0595377	2.82456	0.00473453	0.0629036	Coding
Taok1	95.8535	-0.340064	0.120403	-2.82438	0.00473728	0.0629036	Coding
Gpbp1l1	136.352	-0.33117	0.117268	-2.82404	0.0047423	0.0629086	Coding
2020-09-01	735.532	0.220615	0.0781437	2.82319	0.00475478	0.0630124	Coding
Sertad1	103.204	0.392478	0.139109	2.82138	0.0047818	0.0633086	Coding
Depdc1b	6.96314	1.51329	0.536463	2.82086	0.00478955	0.0633493	Coding
Gm10827	47.6731	-2.07933	0.737516	-2.81937	0.00481181	0.0635817	Predicted
Gigyf2	50.1147	-0.466571	0.16552	-2.81881	0.00482015	0.0636297	Coding
Esco2	37.4044	0.944069	0.334959	2.81846	0.00482551	0.0636385	Coding
Psma6	377.214	0.214549	0.0761359	2.81797	0.00483283	0.063673	Coding
Gm2830	2.8343	2.77301	0.984489	2.8167	0.00485203	0.0638639	Predicted
Trps1	151.709	-0.351378	0.12477	-2.81619	0.00485964	0.0639019	Coding
Tff1	5.53952	2.39911	0.852425	2.81445	0.00488602	0.0641506	Coding
Pdcd6	348.018	0.2378	0.0844963	2.81432	0.00488803	0.0641506	Coding
Ino80d	91.8762	-0.360115	0.128032	-2.81269	0.00491288	0.0644143	Coding
Gm12976	2.61862	-2.58925	0.920762	-2.81207	0.00492239	0.0644767	Predicted
Lrrc8d	55.7565	-0.465393	0.165517	-2.81175	0.00492733	0.0644789	Coding
Gm9385	68.1373	0.463181	0.164785	2.81082	0.00494149	0.0646018	Predicted
Rassf5	313.04	-0.219083	0.0780531	-2.80684	0.00500296	0.0652998	Coding
Hist1h2ae	143.655	0.787645	0.280626	2.80674	0.00500452	0.0652998	Coding
Gm13408	15.797	0.981866	0.349922	2.80596	0.00501671	0.0653959	Predicted
Gm15013	1.44882	3.07472	1.09601	2.80538	0.00502574	0.0654506	Predicted
Timm13	392.529	0.209773	0.0748025	2.80436	0.00504166	0.0655949	Coding
3010003L21Rik	22.8028	-0.742327	0.264829	-2.80305	0.00506223	0.0657993	Noncoding
Gemin6	22.6996	0.828304	0.295576	2.80234	0.00507334	0.0658805	Coding
Tnpo1	85.9143	-0.363672	0.129795	-2.80189	0.00508043	0.0659094	Coding
Casp2	51.1761	-0.487486	0.174019	-2.80134	0.00508909	0.0659586	Coding
Nsd2	158.486	0.308889	0.110287	2.80076	0.0050982	0.0660134	Coding
Tpt1-ps6	1.43996	3.04608	1.088	2.79972	0.00511473	0.0661642	Noncoding
Herpud1	113.703	0.447263	0.159824	2.79848	0.00513441	0.0663554	Coding
Ybx1	2266.57	0.15399	0.0550899	2.79526	0.00518583	0.0669561	Coding
Sfxn3	52.6612	-0.455974	0.163162	-2.79461	0.00519628	0.0670033	Coding
Zfp773	31.223	-0.625912	0.223994	-2.79433	0.00520075	0.0670033	Coding
Fam46c	68.1659	0.4941	0.176836	2.79411	0.00520433	0.0670033	Coding
Ctla2b	17.7172	0.951303	0.340513	2.79374	0.00521029	0.0670084	Coding
Trim56	67.6365	-0.394105	0.141081	-2.79347	0.00521462	0.0670084	Coding
Cfl1	3110.27	0.153716	0.055046	2.7925	0.00523018	0.0671446	Coding
Sh2d1a	296.69	0.412877	0.1479	2.79159	0.00524498	0.0672708	Coding
Idi2	4.60204	-2.96558	1.06346	-2.78861	0.00529342	0.0678279	Coding
Taldo1	544.728	0.168924	0.0605861	2.78816	0.00530082	0.0678584	Coding
Gm2546	1.51984	3.10631	1.11484	2.78634	0.00533077	0.0681774	Predicted
Bbs12	9.18846	-1.08111	0.388195	-2.78497	0.0053532	0.0683997	Coding
3830403N18Rik	2.14176	-3.65406	1.31346	-2.78201	0.00540226	0.0689616	Coding
Gm5586	10.389	1.16964	0.420747	2.7799	0.00543757	0.0692446	Predicted
Gm28875	38.7682	-0.539715	0.194162	-2.77972	0.00544059	0.0692446	Predicted
Gls	263.486	-0.266165	0.095758	-2.77956	0.00544329	0.0692446	Coding
Washc4	52.2409	-0.518153	0.186422	-2.77946	0.00544488	0.0692446	Coding
Rpl19-ps1	5.65936	1.83448	0.660392	2.77786	0.00547185	0.0695222	Ribosomal
Pdia3	813.101	0.172472	0.0621233	2.77628	0.00549851	0.0696798	Coding
Gm5915	11.0597	1.11913	0.403113	2.77621	0.0054996	0.0696798	Predicted
Cldn10	3.27338	-1.81923	0.655295	-2.77621	0.00549968	0.0696798	Coding
Fhod1	24.4499	-0.643313	0.231926	-2.77378	0.00554087	0.0701361	Coding
Gtf3c1	49.3281	-0.462865	0.166909	-2.77316	0.00555152	0.0701901	Coding
Reep4	55.0084	0.491921	0.177402	2.77292	0.00555551	0.0701901	Coding
6720464F23Rik	72.7555	-0.482048	0.173912	-2.7718	0.00557478	0.0703679	Noncoding
Frg1	213.574	0.258725	0.0933887	2.77041	0.00559863	0.0706031	Coding
B4galt5	96.9147	-0.392842	0.141827	-2.76987	0.00560785	0.0706537	Coding
Cox18	85.1463	0.398789	0.144027	2.76885	0.00562553	0.0707791	Coding
Actr2	584.508	-0.193724	0.0699697	-2.76869	0.00562825	0.0707791	Coding
Mir1949.1	13.8325	-0.855661	0.309096	-2.76827	0.00563554	0.070805	Noncoding
Slamf7	100.649	0.746706	0.269855	2.76706	0.00565637	0.0709743	Coding
Psmd4	425.833	0.214911	0.0776725	2.76688	0.0056595	0.0709743	Coding
Gm23751	4.53662	-1.49956	0.542228	-2.76555	0.00568271	0.0711994	Predicted
Gm9774	11.4668	-0.93521	0.338347	-2.76406	0.00570878	0.0714289	Predicted
Lgals8	52.8722	-0.514423	0.186122	-2.7639	0.00571157	0.0714289	Coding
Atg16l2	73.9934	-0.384368	0.139096	-2.76333	0.00572146	0.0714865	Coding
Gm28791	49.6201	-0.471609	0.170689	-2.76297	0.00572772	0.0714989	Predicted
Eif4a-ps4	5.6483	1.8046	0.653385	2.76192	0.00574619	0.0716633	Noncoding
Nmt2	57.023	-0.487204	0.176502	-2.76034	0.00577418	0.0718719	Coding
Gm8355	11.0173	-0.926334	0.335588	-2.76033	0.00577424	0.0718719	Predicted
Mrpl28	101.824	0.411985	0.149266	2.76007	0.00577883	0.0718719	Coding
Snrpc	240.828	0.252277	0.0914408	2.75891	0.00579944	0.072062	Coding
Gm43430	62.3296	-0.468316	0.169793	-2.75815	0.00581292	0.0721633	Predicted
Nudt21	359.689	0.210236	0.0762688	2.75651	0.0058422	0.0724348	Coding
Mpc2	281.891	0.218137	0.0791485	2.75604	0.0058505	0.0724348	Coding
Galm	9.55202	-1.0722	0.389038	-2.75603	0.00585083	0.0724348	Coding
Kin	75.5647	0.402225	0.146127	2.75258	0.00591271	0.073134	Coding
Gm11273	11.6732	1.03892	0.377567	2.75162	0.00593019	0.0732833	Predicted
Pbdc1	161.476	0.351458	0.127749	2.75117	0.00593835	0.0732861	Coding
Rnf170	36.7967	-0.562837	0.204593	-2.75101	0.00594124	0.0732861	Coding
Acsl4	126.993	-0.404635	0.147104	-2.75067	0.00594737	0.0732949	Coding
Gm3362	3.32977	2.39746	0.873191	2.74563	0.00603951	0.0743628	Predicted
Gtpbp2	72.3448	-0.439101	0.159957	-2.74511	0.00604911	0.0744133	Coding
Gm16379	1.5227	3.14861	1.14712	2.74479	0.00605498	0.0744181	Predicted
Gm4604	81.7867	0.405249	0.147689	2.74394	0.00607063	0.0745427	Predicted
Psmd8	440.564	0.202519	0.0738314	2.743	0.00608811	0.0746897	Coding
Usp22	29.8298	-0.646864	0.235914	-2.74195	0.0061076	0.074861	Coding
Gm10382	3.20421	-2.07944	0.758662	-2.74093	0.00612652	0.0750249	Predicted
Gm45855	7.92946	1.30577	0.476578	2.73989	0.00614602	0.0751958	Predicted
Ect2	16.9813	1.05322	0.384514	2.73909	0.00616099	0.0753109	Coding
Fcho2	93.8112	-0.365854	0.133626	-2.7379	0.00618334	0.0754711	Coding
Ppp1cb	166.277	-0.266874	0.0974776	-2.7378	0.00618524	0.0754711	Coding
Rpsa-ps9	7.43262	1.50562	0.550115	2.73692	0.00620177	0.0756047	Noncoding
Mrps23	147.963	0.286911	0.104857	2.73622	0.006215	0.0756978	Coding
Prr12	28.8336	-0.653121	0.238789	-2.73514	0.00623542	0.0758782	Coding
Gm45778	28.4829	-0.755865	0.276582	-2.73288	0.0062784	0.0763025	Predicted
Gm16470	1.43227	3.00556	1.09989	2.73261	0.0062835	0.0763025	Predicted
Anp32a	665.139	-0.27127	0.0992784	-2.73242	0.00628718	0.0763025	Coding
Itgb7	158.061	0.739254	0.270678	2.73112	0.00631204	0.0765309	Coding
Gimap4	819.36	0.265182	0.0971062	2.73084	0.0063173	0.0765309	Coding
Gtf2h3	39.3738	-0.509441	0.18658	-2.73041	0.00632558	0.0765627	Coding
Slc15a1	11.3593	-1.37204	0.503384	-2.72562	0.00641802	0.0776122	Coding
Traf5	14.8605	0.909397	0.333709	2.72512	0.00642785	0.0776617	Coding
Cpne1	4.77443	-1.41959	0.521226	-2.72357	0.00645807	0.0779573	Coding
Nme1	906.392	0.208736	0.0767655	2.71913	0.00654531	0.07894	Coding
Mknk2	179.623	-0.265424	0.0977121	-2.71638	0.00659992	0.0795278	Coding
Gm44836	2.37162	-2.03966	0.750991	-2.71595	0.00660852	0.0795607	Predicted
Gm4617	6.72934	1.45607	0.536258	2.71525	0.00662256	0.0796589	Predicted
Gm38358	12.5634	-0.895992	0.330178	-2.71366	0.00665437	0.0799706	Predicted
Uqcrc2	340.033	0.194584	0.0717201	2.7131	0.00666563	0.0800348	Coding
Icos	703.166	0.430048	0.158583	2.71181	0.00669161	0.0802756	Coding
Evi2	29.3195	-0.569978	0.21036	-2.70953	0.00673785	0.0807555	Coding
Knstrn	64.6608	0.514115	0.189763	2.70925	0.00674354	0.0807555	Coding
Smap1	330.878	0.218701	0.0807389	2.70874	0.00675386	0.0808077	Coding
Ccng2	107.328	0.400558	0.147925	2.70784	0.0067722	0.0809419	Coding
Igfbp4	5.19265	2.31923	0.85656	2.70761	0.00677703	0.0809419	Coding
Gigyf1	55.2938	-0.460822	0.17031	-2.70578	0.00681444	0.0812216	Coding
Id2	2378.23	0.363406	0.134309	2.70575	0.00681503	0.0812216	Coding
Ndc80	31.1403	0.691228	0.255482	2.70558	0.00681844	0.0812216	Coding
Ppm1b	142.136	-0.277485	0.10261	-2.70427	0.00684554	0.0814556	Coding
Selenos	341.683	0.296495	0.109649	2.70404	0.00685012	0.0814556	Coding
Amd2	5.30382	-1.375	0.508667	-2.70313	0.00686894	0.0815403	Coding
Fmnl1	337.147	-0.273745	0.10127	-2.70312	0.00686927	0.0815403	Coding
Sh3glb1	489.529	0.200426	0.0741788	2.70193	0.00689382	0.08176	Coding
Tipin	184.803	0.37995	0.140692	2.70057	0.00692207	0.0820232	Coding
Lsm3	161.756	0.372371	0.13792	2.69991	0.00693587	0.0821149	Coding
Pabpc4	63.142	-0.431161	0.159728	-2.69934	0.0069477	0.0821831	Coding
Pign	20.0899	-0.72068	0.267112	-2.69805	0.00697475	0.0824089	Coding
Uhrf1	68.1107	0.572155	0.212078	2.69785	0.00697896	0.0824089	Coding
Ptpn11	94.8223	-0.350401	0.130105	-2.69323	0.00707644	0.0834595	Coding
Dnmt3a	58.4261	-0.473466	0.175811	-2.69305	0.00708026	0.0834595	Coding
Plp2	330.564	-0.259461	0.0964049	-2.69137	0.00711596	0.0838074	Coding
Rps13-ps2	136.016	0.370435	0.137721	2.68975	0.00715054	0.0841416	Ribosomal
Angpt2	4.68688	-1.45279	0.540522	-2.68775	0.00719342	0.0845551	Coding
Gzma	875.851	1.85452	0.690043	2.68753	0.00719817	0.0845551	Coding
Kif20a	15.2082	0.929949	0.346202	2.68615	0.00722814	0.0847681	Coding
Rac2	2575.04	0.19239	0.071624	2.68612	0.00722882	0.0847681	Coding
Josd1	42.0369	-0.514088	0.191498	-2.68456	0.00726262	0.0850726	Coding
Inafm2	30.7855	-0.674909	0.251425	-2.68434	0.00726735	0.0850726	Coding
Pxdc1	11.3189	-1.50846	0.562084	-2.68368	0.0072816	0.0851658	Coding
Edf1	702.535	0.208208	0.0776213	2.68235	0.00731059	0.0854192	Coding
Dhx40	53.1768	0.501487	0.186979	2.68206	0.00731713	0.0854192	Coding
Ldha	2271.8	0.214352	0.0799325	2.68167	0.00732566	0.0854192	Coding
Cyth4	151.225	-0.337073	0.125702	-2.68154	0.00732849	0.0854192	Coding
Med29	60.1741	0.476764	0.177833	2.68097	0.00734095	0.0854908	Coding
Fbrs	55.7277	-0.422388	0.157584	-2.68039	0.00735365	0.0855651	Coding
Gm43796	2.13159	-2.26133	0.844218	-2.67861	0.00739291	0.0859481	Predicted
Gm23330	1.50374	-2.83908	1.0601	-2.67812	0.00740374	0.0860002	Predicted
Ikzf1	375.16	-0.242869	0.0906972	-2.6778	0.00741077	0.0860081	Coding
Cct7	557.612	0.189535	0.0708189	2.67633	0.00744329	0.0863086	Coding
B930095G15Rik	34.552	-0.713776	0.266727	-2.67606	0.0074494	0.0863086	Noncoding
Exosc7	105.296	0.341363	0.127602	2.67522	0.00746796	0.0864496	Coding
AC153504.1	5.89259	-1.40222	0.524458	-2.67365	0.00750299	0.0867809	Noncoding
Gm14407	2.95306	-2.26875	0.849002	-2.67226	0.00753418	0.0870673	Predicted
Gm7799	2.42034	-1.95572	0.732947	-2.66829	0.00762377	0.0880207	Predicted
Glul	58.6155	-0.442835	0.165978	-2.66803	0.00762967	0.0880207	Coding
Gm21092	1.88588	2.77784	1.04147	2.66722	0.00764826	0.08816	Predicted
Vps13a	127.12	-0.308504	0.115681	-2.66684	0.0076567	0.0881823	Coding
Glipr1	160.83	0.541159	0.20297	2.66621	0.00767119	0.0882741	Coding
Ankrd13c	73.5047	-0.409058	0.153541	-2.66416	0.00771817	0.0886651	Coding
Gm24265	1.73192	-2.63596	0.98942	-2.66415	0.00771826	0.0886651	Predicted
Gm8865	1.49163	3.12162	1.17229	2.66284	0.00774843	0.0889363	Predicted
Fgf2	1.74258	-3.35504	1.26057	-2.66152	0.00777895	0.0891886	Coding
Sectm1a	6.59444	-1.55813	0.585475	-2.66132	0.00778359	0.0891886	Coding
Mkrn1	282.969	0.247051	0.0928626	2.66039	0.00780501	0.0893584	Coding
4931406C07Rik	14.1739	-0.85204	0.320305	-2.66009	0.00781202	0.0893632	Coding
Gm45201	10.6808	-1.04603	0.393366	-2.65917	0.00783335	0.0895316	Predicted
Tmem71	172.41	-0.315928	0.11884	-2.65843	0.00785051	0.0896521	Coding
AC125149.3	25.3635	-0.830969	0.312923	-2.65551	0.0079189	0.0903569	Coding
Mpg	59.7109	0.435539	0.16407	2.65459	0.0079405	0.0905076	Coding
Spink10	3.00605	-2.29406	0.864254	-2.65438	0.00794547	0.0905076	Coding
Ypel2	15.7924	-0.75923	0.286082	-2.65389	0.00795695	0.0905621	Coding
Ccdc18	8.0745	1.35343	0.510627	2.65053	0.0080366	0.0913919	Coding
Slc35b1	106.292	0.363871	0.137321	2.64978	0.00805433	0.0915166	Coding
Sema6d	26.2187	-1.04988	0.396492	-2.64792	0.00809882	0.0919451	Coding
Rad51	54.2534	0.532703	0.201282	2.64656	0.00813159	0.0922398	Coding
Phf3	104.403	-0.34114	0.128971	-2.64509	0.00816703	0.0925318	Coding
Hnrnpab	574.947	0.259458	0.0980967	2.64492	0.008171	0.0925318	Coding
Snrpb	710.246	0.198781	0.0753029	2.63976	0.00829652	0.0938748	Coding
Gm26870	18.8217	-1.15049	0.436318	-2.63683	0.00836859	0.0946111	Predicted
Bach2	71.9824	-0.547602	0.20783	-2.63486	0.00841725	0.0950357	Coding
Gm12195	5.91385	-1.30468	0.495182	-2.63474	0.00842017	0.0950357	Predicted
Smim19	91.8498	0.337651	0.128218	2.63342	0.00845289	0.0952326	Coding
Ift172	2.93139	-2.08967	0.793639	-2.63302	0.00846301	0.0952326	Coding
Hadhb	195.997	0.247356	0.0939478	2.63291	0.00846567	0.0952326	Coding
Ptprk	9.71083	1.48826	0.565255	2.63291	0.00846575	0.0952326	Coding
Nhp2	309.036	0.251794	0.0957699	2.62916	0.00855958	0.0962083	Coding
Nrp1	22.542	-0.903288	0.34377	-2.62759	0.00859911	0.0965724	Coding
Rpl8	7896.57	0.117493	0.0447769	2.62396	0.00869129	0.0974988	Ribosomal
Hnrnpa3	1163.62	0.1569	0.0597994	2.62378	0.008696	0.0974988	Coding
Gm9619	1.29637	2.89962	1.10571	2.62241	0.00873098	0.0978101	Predicted
Mrpl12	233.752	0.264635	0.10094	2.6217	0.0087492	0.0978606	Coding
Cops5	156.72	0.291334	0.111125	2.62167	0.00874994	0.0978606	Coding
Gm10131	6.30426	-1.2638	0.482111	-2.62138	0.00875738	0.097863	Predicted
Gm9132	3.42556	2.30366	0.879666	2.61879	0.00882422	0.0985287	Predicted
Slc25a4	691.786	0.160313	0.0612359	2.61796	0.00884561	0.0986182	Coding
Gramd1b	78.5702	-0.369887	0.141299	-2.61776	0.00885085	0.0986182	Coding
Zcchc18	9.83149	1.13994	0.435549	2.61725	0.00886423	0.0986182	Coding
Tox	180.338	-0.559179	0.213664	-2.61709	0.00886828	0.0986182	Coding
Dnajc9	434.939	0.206671	0.0789701	2.61708	0.00886865	0.0986182	Coding
Tbc1d22a	29.2679	0.607256	0.232152	2.61577	0.0089026	0.0988709	Coding
Sh3bp5	43.1275	-0.729617	0.278944	-2.61564	0.00890598	0.0988709	Coding
Cmss1	16.2394	0.913381	0.349239	2.61535	0.00891368	0.0988754	Coding
Pimreg	20.1322	0.905363	0.346235	2.61488	0.00892592	0.0989301	Coding
AC156031.2	5.37198	-1.4865	0.568837	-2.61322	0.00896933	0.09933	Noncoding
1700065D16Rik	4.1632	-1.5377	0.588513	-2.61286	0.00897889	0.0993547	Noncoding
Eif2s1	349.97	0.235248	0.0900482	2.61247	0.00898914	0.0993869	Coding
Ncapg2	28.0948	0.687466	0.263255	2.61141	0.00901696	0.0996132	Coding
Eef1d	1077.22	0.13739	0.0526198	2.611	0.0090278	0.0996322	Coding
Gm14418	6.03527	-1.26853	0.485879	-2.61079	0.0090334	0.0996322	Predicted
Ranbp1	711.876	0.25486	0.0976863	2.60896	0.00908172	0.100084	Coding
Swi5	425.41	0.238694	0.0915008	2.60866	0.00908985	0.100092	Coding
Snrnp40	171.976	0.257099	0.0985729	2.60821	0.0091017	0.100141	Coding
Gm12416	1.43572	3.00739	1.15366	2.60683	0.00913837	0.100416	Predicted
Pcnx	22.0081	-0.723163	0.277423	-2.60672	0.00914149	0.100416	Coding
Clk1	245.432	-0.386067	0.148148	-2.60596	0.00916172	0.100555	Coding
Fam199x	19.01	-0.726003	0.278643	-2.60549	0.00917422	0.100555	Coding
D430040D24Rik	2.98104	-2.31921	0.890153	-2.60541	0.00917643	0.100555	Noncoding
Gm44705	1.31125	2.92778	1.12417	2.6044	0.00920346	0.100645	Predicted
Gm20627	8.25549	-1.11066	0.426455	-2.6044	0.00920353	0.100645	Predicted
Gm20111	1.973	-2.37748	0.912917	-2.60427	0.00920694	0.100645	Predicted
Igf2r	96.4968	-0.357161	0.137272	-2.60185	0.00927236	0.101278	Coding
AC129022.1	11.4389	-0.879438	0.338097	-2.60114	0.00929147	0.101405	Noncoding
Zcchc17	167.004	0.25989	0.0999276	2.60078	0.0093011	0.101428	Coding
Paip1	53.5027	-0.483981	0.186149	-2.59997	0.00932324	0.101588	Coding
Cd3d	2903.12	0.19962	0.0768439	2.59773	0.00938427	0.102171	Coding
Dscc1	16.6266	0.898722	0.346046	2.59712	0.00940088	0.102248	Coding
Gimap6	454.649	0.425257	0.163755	2.59692	0.00940648	0.102248	Coding
Sh3bgrl3	2719.32	0.201099	0.0774481	2.59656	0.00941624	0.102272	Coding
Gm10237	1.79902	-2.4931	0.960606	-2.59534	0.00944968	0.102553	Predicted
Pkp3	206.23	0.448958	0.173165	2.59266	0.00952361	0.103215	Coding
Mastl	14.3068	0.978255	0.377329	2.59258	0.00952588	0.103215	Coding
AC124421.1	3.72094	-1.59201	0.614589	-2.59036	0.00958753	0.1038	Noncoding
Bcl2a1b	970.218	0.242563	0.09367	2.58955	0.0096102	0.103877	Coding
Nsd3	408.763	-0.208216	0.0804134	-2.58932	0.00961668	0.103877	Coding
Fkbp3	520.884	0.170274	0.0657665	2.58906	0.00962375	0.103877	Coding
AC125020.2	2.66251	-2.00272	0.773548	-2.58901	0.00962533	0.103877	Noncoding
Ppp6r1	192.883	-0.255949	0.0988834	-2.58839	0.00964247	0.103979	Coding
Nedd8	772.872	0.142559	0.0550882	2.58783	0.00965822	0.104066	Coding
Gm2214	3.20006	-1.8632	0.720169	-2.58717	0.00967679	0.104183	Predicted
Sarnp	318.255	-0.204515	0.0790656	-2.58665	0.00969127	0.104256	Coding
Lsm6	331.683	0.232899	0.0900686	2.5858	0.00971536	0.104432	Coding
Clspn	78.195	0.482004	0.186443	2.58526	0.00973048	0.104512	Coding
Dlg2.1	29.8181	-0.682304	0.263968	-2.58479	0.0097437	0.104571	Noncoding
B9d2	66.9054	0.394118	0.152522	2.58401	0.00976603	0.104728	Coding
Ndufa3	523.244	-0.164014	0.0634929	-2.58318	0.00978934	0.104895	Coding
Iqgap3	3.2248	2.33565	0.904935	2.58102	0.00985103	0.105472	Coding
Dkkl1	44.9581	0.582957	0.225928	2.58028	0.00987201	0.105613	Coding
Strn	45.6611	-0.440176	0.17064	-2.57956	0.00989249	0.105749	Coding
Ifitm3	676.738	0.349605	0.135576	2.57866	0.00991833	0.105942	Coding
Soat1	111.502	-0.363677	0.141116	-2.57715	0.0099618	0.106322	Coding
Trim23	17.5565	0.810284	0.314473	2.57664	0.00997652	0.106395	Coding
Zfp451	77.1392	-0.397924	0.154455	-2.5763	0.00998629	0.106416	Coding
AC151730.1	21.128	-1.22545	0.476072	-2.57408	0.0100508	0.107019	Noncoding
AL591207.3	1.541	-3.07711	1.19683	-2.57104	0.0101393	0.107876	Noncoding
Olfr655	13.3844	-3.44072	1.33858	-2.57043	0.0101573	0.107892	Coding
AC129329.1	1.39156	2.96188	1.15236	2.57027	0.0101618	0.107892	Noncoding
Ecm1	13.1053	1.08126	0.420693	2.57018	0.0101646	0.107892	Coding
Gm11826	8.0435	-1.0103	0.393344	-2.5685	0.0102141	0.108332	Predicted
Mrpl27	75.7667	0.37992	0.148058	2.56602	0.0102874	0.109024	Coding
Fkbp2	200.559	0.294757	0.114926	2.56477	0.0103245	0.109331	Coding
Ccm2	76.774	0.425528	0.166077	2.56222	0.0104004	0.110049	Coding
Prss2	75.364	2.63622	1.0291	2.56169	0.0104164	0.110132	Coding
mt-Cytb	7689.35	0.115041	0.0449152	2.5613	0.0104281	0.11017	Mitochondrial
Gm8894	1.24844	2.85302	1.11396	2.56116	0.0104323	NA	Predicted
Herc3	42.3907	-0.526513	0.205655	-2.56018	0.0104619	0.110441	Coding
Gm8925	14.8442	-0.797214	0.311504	-2.55925	0.01049	0.110651	Predicted
Gm10060	1.64374	-2.4797	0.969251	-2.55837	0.0105165	0.110844	Predicted
P3h4	1.24914	2.86324	1.11926	2.55815	0.0105231	NA	Coding
Gm35082	1.63786	-2.56166	1.00152	-2.55778	0.0105342	0.110871	Predicted
Gm7589	1.30457	2.91584	1.14002	2.5577	0.0105367	0.110871	Predicted
Ptpn6	361.167	-0.45481	0.177835	-2.55747	0.0105435	0.110871	Coding
Mecp2	61.7987	-0.392794	0.153623	-2.55686	0.0105621	0.110977	Coding
Snora33	3.55135	-1.59132	0.622438	-2.5566	0.0105701	0.110977	Noncoding
Mlxip	54.1358	-0.428925	0.167833	-2.55566	0.0105986	0.111191	Coding
Gm37019	10.9168	-0.889494	0.348258	-2.55413	0.0106454	0.111558	Predicted
Gm5453	33.5461	-0.540128	0.211485	-2.55397	0.0106501	0.111558	Predicted
Gm5805	22.5472	0.667514	0.261429	2.55333	0.0106698	0.111564	Predicted
Arhgap1	46.4323	0.498822	0.195365	2.55329	0.0106712	0.111564	Coding
Dnajb14	19.1914	-0.676562	0.264991	-2.55315	0.0106753	0.111564	Coding
Hint1	1373.53	0.161969	0.0634633	2.55216	0.0107057	0.111795	Coding
Hmmr	58.0935	0.659454	0.258442	2.55165	0.0107214	0.111873	Coding
Rpl35a-ps7	6.04062	-1.32017	0.517527	-2.55091	0.0107442	0.112024	Ribosomal
Pycard	266.358	0.266892	0.104652	2.55027	0.0107639	0.112143	Coding
Dffa	33.9794	-0.542466	0.212794	-2.54926	0.0107952	0.112383	Coding
Gm36936	4.21922	-1.8519	0.726809	-2.54798	0.0108348	0.112622	Predicted
Mthfsl	78.7624	-0.390979	0.153447	-2.54798	0.0108348	0.112622	Coding
Timm17a	240.797	0.31608	0.124088	2.54722	0.0108584	0.112758	Coding
Erp44	297.817	0.23164	0.09095	2.54689	0.0108687	0.112758	Coding
Pgp	115.713	0.307499	0.120741	2.54676	0.0108729	0.112758	Coding
Gm16409	10.0636	-0.96252	0.378063	-2.54593	0.0108988	0.112941	Predicted
Znrd1	211.521	0.247022	0.0970476	2.54537	0.0109162	0.113034	Coding
Vrk3	47.3035	0.499198	0.196155	2.54492	0.0109303	0.113094	Coding
Pik3cd	160.507	-0.265244	0.104237	-2.54462	0.0109397	0.113105	Coding
Gm7936	1.21964	2.79456	1.09859	2.54378	0.010966	NA	Predicted
Trp53bp1	29.383	-0.625892	0.246067	-2.54358	0.0109722	0.113355	Coding
Gm22063	9.64751	-0.989689	0.389158	-2.54315	0.0109857	0.113407	Predicted
Cystm1	6.52132	1.34986	0.531032	2.54196	0.0110234	0.113709	Coding
Gm3531	2.67267	2.54308	1.00186	2.53836	0.0111375	0.114719	Predicted
Nsmce2	101.659	0.344712	0.135808	2.53822	0.0111417	0.114719	Coding
Ikzf3	95.7271	-0.415859	0.163848	-2.53807	0.0111466	0.114719	Coding
Gm38110	2.0479	-2.17693	0.857804	-2.5378	0.0111552	0.11472	Predicted
Snrpa	154.498	0.299396	0.117997	2.53731	0.0111707	0.114792	Coding
Stxbp2	91.9437	-0.346425	0.136565	-2.5367	0.0111902	0.114906	Coding
Ptma	7783.04	0.204253	0.0805483	2.53578	0.0112197	0.115121	Coding
Mrpl43	212.646	0.232557	0.0918705	2.53136	0.0113622	0.116441	Coding
Sergef	26.9462	0.652158	0.257642	2.53126	0.0113655	0.116441	Coding
Twsg1	89.4711	-0.450589	0.178038	-2.53086	0.0113784	0.116485	Coding
Pitpnm2	45.4925	-0.547348	0.216342	-2.53001	0.0114059	0.116602	Coding
Gpn1	43.3721	0.494391	0.195414	2.52997	0.0114071	0.116602	Coding
Jarid2	216.67	-0.274198	0.108414	-2.52918	0.0114329	0.116778	Coding
Rsl1d1	357.885	0.212252	0.0839479	2.52838	0.0114591	0.116951	Coding
Gm7434	9.07638	1.17693	0.465533	2.52813	0.0114671	0.116951	Predicted
Gas5	1019.04	-0.219363	0.0867809	-2.52778	0.0114786	0.116979	Noncoding
Dlgap5	37.0613	0.75788	0.300076	2.52563	0.0115492	0.117551	Coding
Chic2	395.603	0.232935	0.0922315	2.52554	0.011552	0.117551	Coding
Smc1a	284.801	0.279733	0.110848	2.52357	0.0116169	0.118102	Coding
Cx3cr1	263.297	-1.03121	0.408665	-2.52337	0.0116235	0.118102	Coding
Plgrkt	234.517	0.220438	0.0874259	2.52143	0.0116879	0.118667	Coding
Sesn3	154.862	-0.336547	0.133516	-2.52064	0.0117141	0.118843	Coding
Endod1	111.287	-0.425215	0.168713	-2.52035	0.0117237	0.118852	Coding
Esd	492.558	0.160526	0.0637405	2.51843	0.0117878	0.119329	Coding
Bhlhe40	789.175	-0.228658	0.0907942	-2.51842	0.0117884	0.119329	Coding
1500009L16Rik	40.5192	0.736769	0.292744	2.51677	0.0118436	0.119798	Coding
Gm44597	3.51134	-1.71213	0.680419	-2.51629	0.0118597	0.119872	Predicted
Cdca5	24.5469	0.738745	0.293636	2.51586	0.0118744	0.11993	Coding
Prrc2b	154.772	-0.265166	0.105409	-2.51559	0.0118833	0.119931	Coding
Vps29	325.736	0.256429	0.101953	2.51515	0.011898	0.11999	Coding
Ngdn	121.811	0.32783	0.130357	2.51486	0.0119081	0.120003	Coding
Ncapd3	89.5512	0.387035	0.153959	2.51389	0.0119409	0.120243	Coding
Gm2076	1.18425	2.78455	1.10796	2.51323	0.0119632	NA	Predicted
Rps14	8885.43	0.0765868	0.0304775	2.5129	0.0119744	0.120491	Ribosomal
Map2k1	136.314	-0.260313	0.103609	-2.51244	0.0119899	0.120527	Coding
Dnajc19-ps	1.34178	2.96194	1.17908	2.51209	0.0120019	0.120527	Noncoding
Gm10145	1.82874	2.67246	1.06388	2.51201	0.0120046	0.120527	Predicted
Il18rap	331.525	-0.366821	0.146093	-2.51087	0.0120433	0.12075	Coding
Hsp90b1	1090.58	0.228314	0.0909316	2.51083	0.0120447	0.12075	Coding
Ptch1	59.3185	-0.441984	0.176079	-2.51014	0.0120683	0.120897	Coding
Stard5	14.8748	0.864036	0.344435	2.50856	0.0121225	0.121313	Coding
Ap2s1	300.606	0.22116	0.0881677	2.50841	0.0121278	0.121313	Coding
Lbh	168.784	-0.281151	0.112106	-2.50789	0.0121454	0.121356	Coding
Tnfsf10	143.554	-0.528838	0.210881	-2.50776	0.01215	0.121356	Coding
Ttn	2.69151	-2.25568	0.899574	-2.5075	0.0121589	0.121356	Coding
Gm9083	2.86579	2.23312	0.890926	2.50651	0.0121929	0.121512	Predicted
Gm37248	122.067	0.448447	0.17892	2.50642	0.0121962	0.121512	Predicted
Hist1h4c	7.80276	-1.01612	0.405456	-2.50612	0.0122066	0.121512	Coding
Aurka	23.7644	0.708891	0.282877	2.50601	0.0122104	0.121512	Coding
Bcl2l11	248.286	-0.321336	0.128303	-2.50451	0.0122621	0.121937	Coding
Brca1	20.0598	0.757704	0.30281	2.50224	0.0123409	0.122567	Coding
Entpd6	17.3064	-0.81414	0.325374	-2.50217	0.0123435	0.122567	Coding
Spdl1	16.99	0.8646	0.345593	2.50179	0.0123567	0.122607	Coding
Mrps18c	248.382	0.21758	0.0870045	2.50079	0.0123916	0.122863	Coding
Gm6277	6.69122	-1.25946	0.503817	-2.49983	0.0124254	0.122939	Predicted
Ncapd2	34.5882	0.589832	0.235954	2.49977	0.0124273	0.122939	Coding
Cep76	11.5204	0.959407	0.383806	2.49971	0.0124293	0.122939	Coding
Ube2v1	16.0307	-0.830063	0.332109	-2.49937	0.0124415	0.122939	Coding
Med7	52.9116	0.441749	0.17675	2.49928	0.0124446	0.122939	Coding
Wtap	164.565	-0.265159	0.106191	-2.49701	0.0125244	0.123638	Coding
Gm11604	3.7187	-1.49556	0.599004	-2.49674	0.0125341	0.123643	Predicted
Tmem170b	27.1207	-0.627907	0.251573	-2.49593	0.0125628	0.123836	Coding
Prelid3b	168.996	0.267972	0.107399	2.4951	0.0125921	0.123983	Coding
Mtmr3	48.1018	-0.456298	0.182886	-2.49499	0.012596	0.123983	Coding
Oser1	144.534	0.318742	0.12783	2.49349	0.0126494	0.124398	Coding
Gm35439	5.15885	-1.39081	0.557823	-2.49329	0.0126566	0.124398	Predicted
Kctd5	26.7345	0.585808	0.234984	2.49297	0.012668	0.12442	Coding
Fam133b	170.149	-0.272855	0.109586	-2.48988	0.0127787	0.125416	Coding
Atxn3	38.0647	-0.461016	0.185233	-2.48884	0.012816	0.125692	Coding
Tomm5	362.847	0.229031	0.092042	2.48833	0.0128344	0.125711	Coding
Ddit3	105.061	0.357553	0.143695	2.48827	0.0128366	0.125711	Coding
Tmed9	577.138	0.159177	0.0639775	2.48801	0.012846	0.125712	Coding
Psmc4	236.25	0.229975	0.0924722	2.48697	0.0128838	0.125991	Coding
Gm43294	2.98291	-1.78882	0.71947	-2.4863	0.0129079	0.126037	Predicted
Gzmg	62.5714	2.15721	0.867652	2.48626	0.0129094	0.126037	Coding
Lef1	62.3574	0.765577	0.307965	2.48593	0.0129215	0.126037	Coding
Ezh1	60.7561	-0.42419	0.170644	-2.48581	0.0129257	0.126037	Coding
Ifi211	26.1265	-0.60804	0.244721	-2.48462	0.0129688	0.12629	Coding
Vps39	30.6844	-0.525473	0.211494	-2.48458	0.0129703	0.12629	Coding
Ccr1	20.3724	0.783731	0.315495	2.48413	0.012987	0.126362	Coding
Rps27l	637.386	0.207939	0.0837326	2.48337	0.0130147	0.126485	Ribosomal
Sec11a	419.757	0.205365	0.0826996	2.48327	0.0130183	0.126485	Coding
Uxt	49.6957	0.437043	0.176051	2.48247	0.0130475	0.126678	Coding
Gm5075	6.13196	1.34091	0.540314	2.48173	0.0130747	0.126776	Predicted
Egr1	149.427	-0.503184	0.202759	-2.48168	0.0130763	0.126776	Coding
Syt11	42.6554	-0.555147	0.223735	-2.48127	0.0130916	0.126833	Coding
Gm13611	176.345	-0.231086	0.0932228	-2.47886	0.0131805	0.127603	Predicted
Gm15361	1.24468	2.82991	1.14169	2.4787	0.013186	NA	Predicted
Dennd3	8.54761	-1.09966	0.443736	-2.47819	0.0132052	0.127751	Coding
Slc25a5	1371.33	0.1971	0.0795661	2.47719	0.0132422	0.128017	Coding
Gm10051	4.11142	1.82224	0.735871	2.4763	0.0132752	0.128162	Predicted
Ddhd2	47.5298	-0.415342	0.167729	-2.47628	0.0132761	0.128162	Coding
AC122465.1	16.6426	-0.733853	0.296555	-2.47459	0.0133389	0.128677	Noncoding
B9d1	2.41381	2.4213	0.978787	2.47378	0.0133692	0.128878	Coding
Hprt	481.39	0.154611	0.0625157	2.47316	0.0133925	0.12901	Coding
Egln1	213.13	0.239403	0.0968311	2.47237	0.0134219	0.129202	Coding
Slfn9	32.8228	-0.626158	0.253403	-2.47099	0.0134738	0.129609	Coding
Gm11964	1.218	2.81531	1.13967	2.47027	0.013501	NA	Predicted
Cdkn3	31.9577	0.63324	0.256348	2.47024	0.0135023	0.129675	Coding
Dcp1b	20.6993	-0.625733	0.253309	-2.47023	0.0135025	0.129675	Coding
Slc6a8	3.69751	-1.73696	0.703207	-2.47005	0.0135094	0.129675	Coding
Kcnmb4os2	5.00032	-1.24805	0.505459	-2.46913	0.013544	0.129915	Noncoding
Gm11209	2.59287	-2.05774	0.833553	-2.46864	0.0135626	0.129927	Predicted
Gm38125	7.67709	-1.24441	0.504095	-2.46859	0.0135645	0.129927	Predicted
Kif23	28.9613	0.668957	0.271024	2.46826	0.0135771	0.129956	Coding
Hist1h1b	113.933	0.603158	0.244594	2.46596	0.0136648	0.130703	Coding
Zfp746	26.2873	-0.579238	0.234948	-2.46539	0.0136866	0.130819	Coding
CT009713.9	2.6975	-1.9566	0.793765	-2.46496	0.0137028	0.130882	Noncoding
Gm25541	2.20573	-1.92671	0.781747	-2.46462	0.0137158	0.130914	Predicted
Slc22a15	35.1457	-0.560694	0.227678	-2.46266	0.013791	0.131539	Coding
Tmem87a	53.2082	-0.401909	0.163393	-2.45977	0.0139026	0.132473	Coding
Gadd45gip1	92.1164	0.320401	0.13027	2.4595	0.0139129	0.132473	Coding
Trappc1	101.55	0.30923	0.125746	2.45916	0.0139264	0.132473	Coding
Med28	293.949	0.227536	0.0925275	2.45911	0.0139281	0.132473	Coding
Pih1d1	89.009	0.347362	0.1413	2.45833	0.0139583	0.132668	Coding
Atp6v1e1	139.103	0.278089	0.113136	2.458	0.0139712	0.132697	Coding
Psmb3	864.14	0.153	0.0622531	2.45771	0.0139827	0.132714	Coding
Gm8580	4.45584	-1.65037	0.671815	-2.45658	0.0140266	0.133037	Predicted
Syce2	54.7891	0.516484	0.210293	2.45603	0.0140483	0.133076	Coding
Ankrd50	20.8357	-0.668529	0.272205	-2.45597	0.0140504	0.133076	Coding
Rbx1	825.677	0.128925	0.0525328	2.45417	0.014121	0.133651	Coding
Wbscr22	81.9897	0.352495	0.143725	2.45256	0.0141842	0.134138	Coding
Pdia6	525.075	0.232179	0.0946757	2.45236	0.0141922	0.134138	Coding
Arhgef18	26.8205	-0.623647	0.254469	-2.45078	0.0142547	0.134635	Coding
Dhx15	205.268	-0.235695	0.0962248	-2.44943	0.0143084	0.135048	Coding
Ddost	341.818	0.208307	0.0850959	2.44791	0.0143689	0.135391	Coding
Nans	196.213	0.23386	0.0955384	2.44781	0.0143728	0.135391	Coding
Gk5	2.21105	-2.03557	0.831605	-2.44776	0.0143748	0.135391	Coding
Rcbtb2	25.992	0.717834	0.293519	2.44562	0.0144604	0.136021	Coding
Ints7	40.6597	-0.548386	0.224273	-2.44517	0.0144783	0.136021	Coding
Tuba1a	161.922	0.313048	0.128029	2.44515	0.0144793	0.136021	Coding
Gm14029	36.219	-0.486702	0.199053	-2.44508	0.0144819	0.136021	Predicted
C230024C17Rik	22.2963	-0.681943	0.279067	-2.44365	0.0145396	0.136438	Noncoding
Topbp1	96.1236	0.361561	0.14797	2.44348	0.0145465	0.136438	Coding
Mrps18a	94.6765	0.3381	0.138382	2.44323	0.0145566	0.136438	Coding
AU040320	25.8852	-0.556497	0.227796	-2.44296	0.0145674	0.136438	Coding
Rps11-ps1	146.159	0.265523	0.108706	2.44259	0.0145823	0.136438	Ribosomal
Tmem263	70.7673	-0.358683	0.146852	-2.44248	0.0145867	0.136438	Coding
Marveld2	4.74035	-1.36613	0.559479	-2.44179	0.0146145	0.136471	Coding
Adam8	69.2794	0.627283	0.256907	2.44167	0.0146194	0.136471	Coding
Arpc1a	113.134	0.302728	0.123991	2.44152	0.0146255	0.136471	Coding
Tbc1d4	40.207	-0.547728	0.22435	-2.4414	0.0146305	0.136471	Coding
Cish	189.36	-0.275312	0.112797	-2.44077	0.0146558	0.136546	Coding
Ddx24	344.207	0.236306	0.0968187	2.4407	0.0146588	0.136546	Coding
Zfp407	38.2723	-0.446932	0.183188	-2.43975	0.0146975	0.136786	Coding
Trav12-2	2.42414	-2.85558	1.17053	-2.43957	0.0147047	0.136786	Coding
Gm14138	3.59915	-1.49312	0.612116	-2.43928	0.0147165	0.136802	Predicted
Rfc5	85.2094	0.339829	0.139483	2.43634	0.0148366	0.137824	Coding
Chrac1	173.132	0.240899	0.0989224	2.43523	0.0148822	0.138153	Coding
Ifi27	482.363	0.212458	0.0872573	2.43485	0.0148979	0.138204	Coding
Iqsec1	64.3982	-0.382654	0.157241	-2.43355	0.0149514	0.138605	Coding
Gabarapl2	594.628	0.223335	0.0918078	2.43264	0.0149893	0.138861	Coding
Gm32031	15.0088	-0.759727	0.312465	-2.4314	0.0150406	0.139241	Predicted
Lmo4	22.3497	-0.773089	0.318187	-2.42967	0.0151126	0.139631	Coding
Sh3bgrl	221.302	-0.252374	0.103887	-2.42931	0.0151277	0.139631	Coding
Grn	37.5143	-0.518157	0.213313	-2.4291	0.0151366	0.139631	Coding
Gm1821	27.056	0.634679	0.261299	2.42894	0.0151432	0.139631	Predicted
Gm5883	1.25161	2.82738	1.16409	2.42882	0.0151479	NA	Predicted
Vsig10	12.9171	-0.812073	0.334385	-2.42855	0.0151592	0.139631	Coding
Serpinb6b	859.815	0.498888	0.205437	2.42843	0.0151645	0.139631	Coding
Tubb6	56.3969	0.490329	0.201913	2.42842	0.015165	0.139631	Coding
Smg1	127.942	-0.393976	0.162237	-2.4284	0.0151657	0.139631	Coding
Snx9	32.9515	-0.532211	0.219182	-2.42816	0.0151755	0.139631	Coding
Gm14539	2.20667	2.37442	0.978325	2.42702	0.0152233	0.139976	Predicted
Dsn1	10.762	1.07369	0.442442	2.42673	0.0152356	0.139994	Coding
Uqcc2	345.065	0.183322	0.0755927	2.42513	0.015303	0.140518	Coding
Zfp217	35.3329	-0.467829	0.192954	-2.42456	0.0153268	0.140641	Coding
Cd48	447.043	0.232484	0.0959354	2.42334	0.0153787	0.141022	Coding
Plk4	49.3878	0.470787	0.194302	2.42297	0.0153942	0.141068	Coding
Atp6v0b	242.173	0.232598	0.0960818	2.42083	0.0154852	0.141766	Coding
Rab2a	306.511	0.21472	0.0887022	2.42069	0.0154912	0.141766	Coding
Tmem120a	40.4685	0.539185	0.222948	2.41843	0.0155875	0.14255	Coding
Gm8730	4824.59	-0.116019	0.0480003	-2.41705	0.0156468	0.142996	Predicted
Dpysl2	174.469	-0.254838	0.10548	-2.41599	0.0156925	0.143317	Coding
Rpsa-ps2	11.318	1.00376	0.415761	2.41427	0.0157668	0.143899	Noncoding
Gm8526	4.8106	-1.40652	0.582744	-2.41362	0.0157951	0.14406	Predicted
Usf3	44.2173	-0.452009	0.187321	-2.41302	0.015821	0.144147	Coding
Tbrg1	323.58	0.208301	0.0863277	2.41291	0.0158259	0.144147	Coding
Phip	136.699	-0.277868	0.115205	-2.41195	0.0158675	0.14434	Coding
Banf1	350.039	0.217539	0.0901929	2.41193	0.0158684	0.14434	Coding
Gm7582	1.25253	2.84349	1.179	2.41178	0.0158749	NA	Predicted
Wdr59	7.24738	-1.1002	0.456297	-2.41116	0.015902	0.14447	Coding
Foxj2	44.1425	-0.576776	0.239238	-2.41088	0.015914	0.14447	Coding
Cox14	300.826	0.194085	0.0805043	2.41087	0.0159147	0.14447	Coding
Atp5j	1127.87	0.151062	0.0626863	2.40981	0.015961	0.144793	Coding
Gm5620	1.21877	2.85749	1.18605	2.40924	0.0159856	NA	Predicted
1700047I17Rik2	1.58409	-2.56907	1.06674	-2.40833	0.0160256	0.145181	Coding
Eif1ad	103.82	0.312315	0.129691	2.40814	0.016034	0.145181	Coding
5830405F06Rik	3.01864	-1.88293	0.781914	-2.4081	0.0160359	0.145181	Noncoding
Armc7	83.526	0.384978	0.159995	2.40619	0.01612	0.145844	Coding
Sde2	92.5576	0.340162	0.141393	2.40578	0.0161379	0.145909	Coding
Hspa5	1321.57	0.169636	0.0705476	2.40455	0.0161922	0.146302	Coding
Tab1	20.8913	-0.664757	0.276544	-2.4038	0.0162257	0.146508	Coding
Nkg7	7113.11	0.281153	0.116992	2.40319	0.016253	0.146656	Coding
Gm37080	14.1733	-0.79086	0.329309	-2.40157	0.0163247	0.147196	Predicted
Gm10125	9.42432	-1.02975	0.428841	-2.40123	0.01634	0.147196	Predicted
Psme1	1328.25	0.133491	0.0555957	2.40111	0.0163455	0.147196	Coding
Adam19	85.8258	-0.339645	0.141614	-2.39838	0.0164677	0.148198	Coding
Cwf19l2	68.103	-0.373502	0.155776	-2.39768	0.0164992	0.148383	Coding
Gm11539	9.22789	1.07232	0.447621	2.39559	0.0165934	0.149132	Predicted
Borcs7	34.1092	0.518928	0.216641	2.39534	0.0166051	0.149137	Coding
Xiap	146.808	-0.25938	0.108368	-2.39351	0.016688	0.149783	Coding
Degs2	3.0462	-1.85844	0.776741	-2.39262	0.0167286	0.150048	Coding
Mbnl2	110.852	0.341898	0.142996	2.39097	0.016804	0.150623	Coding
Naca	3998.47	0.110384	0.0461719	2.39073	0.016815	0.150623	Coding
Gm19196	34.5005	-0.483379	0.202451	-2.38764	0.016957	0.151795	Predicted
Mad2l1bp	64.2351	0.411819	0.172668	2.38503	0.0170777	0.152774	Coding
Mrpl49	87.5941	0.348272	0.146121	2.38344	0.0171515	0.153273	Coding
Gm5637	1.16104	2.73237	1.14641	2.38342	0.0171527	NA	Predicted
Ppp1ca	1354.91	0.146304	0.0613888	2.38323	0.0171616	0.153273	Coding
AC160637.1	27.697	-0.564082	0.236708	-2.38303	0.0171707	0.153273	Noncoding
Gm38164	2.27197	-2.0368	0.854772	-2.38286	0.0171787	0.153273	Predicted
Tfg	93.054	0.329087	0.138198	2.38128	0.0172526	0.153679	Coding
Gm26669	44.4109	-0.755281	0.317219	-2.38095	0.0172681	0.153679	Predicted
AC100406.1	2.72184	-1.71666	0.721045	-2.38079	0.0172755	0.153679	Noncoding
Ogt	115.128	-0.287263	0.120668	-2.38061	0.017284	0.153679	Coding
Slc25a33	24.0286	0.683834	0.28727	2.38046	0.0172912	0.153679	Coding
Pam16	227.387	0.235192	0.0988021	2.38043	0.0172923	0.153679	Coding
Rnf125	130.75	0.465452	0.195571	2.37996	0.0173144	0.153775	Coding
Ybx1-ps2	1.1919	2.79002	1.17236	2.37984	0.0173202	NA	Noncoding
Prpf4b	333.65	-0.186303	0.0782923	-2.37959	0.0173321	0.153831	Coding
Acp5	82.1552	0.384959	0.161822	2.37891	0.017364	0.153906	Coding
Ctnnb1	218.496	-0.218897	0.0920267	-2.37863	0.0173772	0.153906	Coding
Psmb6	467.544	0.206048	0.086626	2.37859	0.0173788	0.153906	Coding
Gm8623	8.61103	1.01661	0.427455	2.37829	0.0173933	0.153906	Predicted
Pigo	13.6455	-0.772055	0.324638	-2.3782	0.0173974	0.153906	Coding
Haus1	31.7483	0.550675	0.231604	2.37766	0.0174229	0.154031	Coding
Vps50	20.087	-0.624209	0.262586	-2.37716	0.0174467	0.154141	Coding
Gcnt1	72.4389	-0.513438	0.216071	-2.37624	0.01749	0.154423	Coding
Cherp	30.7111	-0.527764	0.222188	-2.37531	0.0175344	0.154714	Coding
E130307A14Rik	9.19551	-0.881455	0.371193	-2.37466	0.0175653	0.154814	Noncoding
Dusp16	46.4153	-0.547911	0.230739	-2.37459	0.0175686	0.154814	Coding
Gm45745	10.4808	-0.904941	0.381151	-2.37423	0.0175856	0.154863	Predicted
Ndufs6	421.827	0.159921	0.0673771	2.37352	0.0176193	0.155059	Coding
6330418K02Rik	8.305	1.08509	0.457259	2.37303	0.0176426	0.155078	Noncoding
Zbtb32	218.477	0.330328	0.139203	2.373	0.0176443	0.155078	Coding
Rnpc3	37.1614	-0.460684	0.194187	-2.37237	0.0176745	0.155228	Coding
Ndufb8	507.95	0.158622	0.0668751	2.37191	0.0176963	0.155228	Coding
Ddrgk1	220.653	0.208365	0.087851	2.37179	0.0177019	0.155228	Coding
Trappc4	295.406	0.180321	0.076031	2.37168	0.0177073	0.155228	Coding
Sf3b2	505.22	0.155278	0.0654857	2.37118	0.0177316	0.15534	Coding
Epb41l2	45.3952	-0.558775	0.235755	-2.37015	0.0177808	0.155671	Coding
Minos1	897.741	0.145377	0.0613874	2.36819	0.0178756	0.1564	Coding
Mfap1a	21.1157	0.66025	0.278917	2.36719	0.0179235	0.156518	Coding
Dhx34	27.0116	0.846817	0.357733	2.36717	0.0179245	0.156518	Coding
Gna15	117.649	0.461988	0.195192	2.36684	0.0179406	0.156518	Coding
Crybg3.1	4.15232	-1.3218	0.558483	-2.36677	0.0179441	0.156518	Noncoding
Txk	133.8	0.282965	0.11956	2.36671	0.0179469	0.156518	Coding
Pgls	489.01	0.162565	0.0687077	2.36604	0.0179795	0.156652	Coding
Rtn4ip1	9.5894	-0.899428	0.38016	-2.36592	0.0179853	0.156652	Coding
Gm10031	16.5507	-0.680238	0.287546	-2.36566	0.0179977	0.156659	Predicted
Bub1b	30.5833	0.73824	0.312237	2.36435	0.0180616	0.157114	Coding
Tmem248	95.6914	0.304089	0.128642	2.36384	0.0180865	0.157229	Coding
Swap70	24.8135	-0.639583	0.270639	-2.36323	0.0181164	0.157388	Coding
1810037I17Rik	879.071	0.1402	0.0594093	2.3599	0.0182801	0.158709	Coding
Shq1	13.0675	-0.812323	0.344266	-2.35958	0.0182958	0.158743	Coding
Calca	13.6194	2.71945	1.15282	2.35895	0.0183267	0.158843	Coding
Ctdnep1	152.303	0.281579	0.11937	2.35887	0.0183307	0.158843	Coding
Lsm2	183.511	0.276112	0.117088	2.35816	0.0183658	0.159045	Coding
Emc3	114.567	0.30793	0.130711	2.3558	0.0184828	0.159854	Coding
Tmem33	146.106	0.272238	0.115564	2.35574	0.0184858	0.159854	Coding
AC154548.2	6.92732	-1.01021	0.428866	-2.35553	0.0184965	0.159854	Noncoding
Rsu1	108.957	0.286724	0.121734	2.35533	0.0185064	0.159854	Coding
Trav17	11.7769	6.07777	2.58097	2.35484	0.0185308	0.159962	Coding
Dda1	151.284	0.240267	0.102058	2.35422	0.0185614	0.160029	Coding
Klhl9	47.8326	-0.424943	0.180504	-2.35421	0.0185621	0.160029	Coding
Brwd1	49.9584	-0.39269	0.166881	-2.35312	0.0186165	0.160349	Coding
Slc9b2	25.505	-0.828864	0.352259	-2.35299	0.0186229	0.160349	Coding
Hes7	3.32283	-1.52389	0.64786	-2.3522	0.0186628	0.160424	Coding
Ap1s2	82.6286	-0.348667	0.148232	-2.35217	0.0186644	0.160424	Coding
Gars	146.639	0.270318	0.114935	2.35192	0.0186769	0.160424	Coding
Cnot2	122.75	-0.269631	0.114645	-2.35188	0.018679	0.160424	Coding
Klra3	53.7477	-1.42739	0.607137	-2.35101	0.0187225	0.160696	Coding
Gm20900	3.41345	1.93726	0.824437	2.3498	0.0187834	0.161077	Predicted
Fryl	89.4793	-0.305129	0.129861	-2.34966	0.0187908	0.161077	Coding
AC125149.2	1.09377	2.643	1.12503	2.34928	0.01881	NA	Coding
Cdc42ep3	82.7616	0.352556	0.150108	2.34868	0.0188401	0.16135	Coding
Snrpe	1356.75	0.124826	0.05315	2.34856	0.0188464	0.16135	Coding
Tex261	130.459	0.266127	0.113357	2.34769	0.0188903	0.161614	Coding
Gm8369	178.043	0.24063	0.102506	2.34747	0.0189011	0.161614	Predicted
Kremen1	11.7445	-0.777176	0.331165	-2.3468	0.0189357	0.161807	Coding
Rab11a	201.958	0.239897	0.102235	2.34653	0.0189494	0.161822	Coding
Gm45251	2.77859	-1.70123	0.725269	-2.34565	0.0189938	0.1621	Predicted
Prpf39	58.011	-0.37534	0.160048	-2.34517	0.0190182	0.16219	Coding
AC124453.1	10.3732	-0.926663	0.39517	-2.34497	0.0190284	0.16219	Noncoding
Zmym5	79.0464	-0.352405	0.150315	-2.34445	0.019055	0.162263	Coding
Wipf1	396.483	-0.223277	0.0952409	-2.34434	0.0190609	0.162263	Coding
Tmem120b	25.6588	-0.592916	0.252969	-2.34383	0.0190869	0.162382	Coding
Eri1	130.57	0.258901	0.110508	2.34283	0.0191381	0.162716	Coding
Ccnb2	111.474	0.659622	0.281707	2.34151	0.0192057	0.163103	Coding
4933440N22Rik	10.8982	-0.847118	0.361788	-2.34147	0.0192077	0.163103	Noncoding
Gm8444	4.25895	-1.46625	0.626698	-2.33964	0.0193025	0.163805	Predicted
AC129975.1	1.77304	2.59189	1.10793	2.33939	0.0193155	0.163813	Noncoding
Klf2	417.031	0.801902	0.342931	2.33838	0.0193676	0.164152	Coding
Dip2b	100.295	-0.291234	0.124567	-2.33797	0.019389	0.16423	Coding
Mterf4	22.5237	0.598546	0.256092	2.33723	0.0194273	0.164386	Coding
Wdr26	232.976	-0.200576	0.0858208	-2.33715	0.0194316	0.164386	Coding
Mrpl17	140.376	0.285401	0.122141	2.33665	0.0194575	0.164464	Coding
Trappc6b	234.481	0.230498	0.0986509	2.3365	0.0194652	0.164464	Coding
Smim10l2a	2.722	-2.36325	1.01169	-2.33594	0.0194944	0.164521	Coding
Gm8724	9.7992	-0.853682	0.365461	-2.33591	0.0194961	0.164521	Predicted
Atp5a1	844.742	0.155166	0.0664337	2.33565	0.0195095	0.164531	Coding
Tdpx-ps1	1.1131	2.68249	1.14873	2.33519	0.0195337	NA	Noncoding
Zfp827	22.0918	-0.74952	0.321191	-2.33356	0.0196186	0.165348	Coding
Adcy7	102.753	-0.304863	0.130677	-2.33295	0.0196508	0.165517	Coding
Leo1	45.8553	0.456389	0.195697	2.33212	0.0196944	0.16578	Coding
Gm9833	3.12628	-1.58912	0.681542	-2.33166	0.0197186	0.165881	Predicted
Ndfip1	537.764	0.260131	0.111764	2.3275	0.0199386	0.167628	Coding
Mfap1b	52.3195	-0.433712	0.186432	-2.32638	0.0199984	0.168026	Coding
Akap13	657.919	-0.177062	0.0761217	-2.32603	0.0200168	0.16804	Coding
Eomes	58.9895	0.683731	0.293966	2.32588	0.0200249	0.16804	Coding
Gm16907	4.50623	-1.2198	0.524575	-2.32532	0.0200549	0.168188	Predicted
C1qtnf12	5.60397	-1.16137	0.499546	-2.32484	0.0200803	0.168297	Coding
1810009J06Rik	6.29363	-7.0596	3.03728	-2.32432	0.0201086	0.16843	Coding
4930570N18Rik	4.51319	-1.34406	0.578609	-2.32291	0.0201839	0.168956	Noncoding
Gtf2h5	340.275	0.181342	0.0781	2.32192	0.0202375	0.169171	Coding
Mrps33	343.644	0.178428	0.0768541	2.32165	0.0202517	0.169171	Coding
Fbxo33	51.1089	0.403237	0.173688	2.32162	0.0202535	0.169171	Coding
Lsm8	258.198	0.220472	0.0949788	2.32128	0.0202717	0.169171	Coding
Cd86	39.5337	0.704959	0.303695	2.32127	0.0202721	0.169171	Coding
Gm9354	2.65939	2.10869	0.9089	2.32005	0.0203382	0.169618	Predicted
Carnmt1	109.078	0.307619	0.132615	2.31964	0.0203604	0.169663	Coding
Repin1	12.0709	-0.777488	0.335205	-2.31944	0.0203713	0.169663	Coding
Gm37039	18.6893	0.757564	0.326684	2.31895	0.0203977	0.169663	Predicted
Ccdc84	34.1189	-0.459056	0.197972	-2.31879	0.0204064	0.169663	Coding
Trav16	3.47948	-1.65108	0.712089	-2.31865	0.020414	0.169663	Coding
Hectd2	9.51467	-0.89558	0.386265	-2.31856	0.0204187	0.169663	Coding
Gm6543	9.60092	-0.906483	0.39107	-2.31795	0.0204518	0.169834	Predicted
Gm26541	10.6221	-0.838627	0.361931	-2.31709	0.0204988	0.17012	Predicted
Pin4	177.778	-0.240018	0.103634	-2.31602	0.020557	0.170451	Coding
Rpl13a-ps1	29.9192	-0.554253	0.239325	-2.3159	0.0205638	0.170451	Ribosomal
1810058I24Rik	319.453	0.172073	0.0743085	2.31566	0.020577	0.170455	Noncoding
Vti1b	140.61	0.250697	0.10828	2.31528	0.0205979	0.170524	Coding
Ttc3	120.128	-0.308129	0.133185	-2.31355	0.0206923	0.171201	Coding
Stat3	701.007	-0.243965	0.105463	-2.31327	0.0207076	0.171224	Coding
Commd8	157.475	0.276618	0.119608	2.3127	0.0207393	0.171356	Coding
Pkd1	15.2418	-0.74313	0.321351	-2.31252	0.020749	0.171356	Coding
Mtch2	172.383	0.230264	0.0996345	2.31108	0.0208283	0.171906	Coding
Gm26660	7.5406	-1.0907	0.472198	-2.30984	0.020897	0.172368	Predicted
Gm5776	1.12588	2.70052	1.16919	2.30974	0.0209027	NA	Predicted
Gm42659	37.4066	-0.446726	0.193444	-2.30933	0.0209253	0.172497	Predicted
B4galt4	3.39834	-1.47278	0.638038	-2.3083	0.0209827	0.172865	Coding
Zfp280d	62.432	-0.342953	0.148795	-2.30487	0.0211739	0.174232	Coding
Zc3h12d	42.408	-0.474028	0.205665	-2.30486	0.0211744	0.174232	Coding
D030056L22Rik	69.7922	0.362362	0.157248	2.3044	0.0212003	0.17434	Coding
Cep290	19.3887	-0.761631	0.330564	-2.30404	0.0212207	0.174401	Coding
AC132344.1	5.14516	-1.21427	0.52714	-2.30351	0.0212501	0.174537	Noncoding
Ocel1	90.9861	0.318114	0.138118	2.3032	0.0212676	0.174575	Coding
Gm8494	5.35175	1.40991	0.612504	2.30188	0.0213421	0.17508	Predicted
Gm12207	2.98429	-1.67809	0.729293	-2.30099	0.0213924	0.175123	Predicted
Timm22	82.8333	0.311892	0.13555	2.30095	0.0213947	0.175123	Coding
Nudcd3	174.933	-0.243653	0.105893	-2.30093	0.0213957	0.175123	Coding
Phlda3	12.9315	1.10691	0.481082	2.30087	0.0213991	0.175123	Coding
Gm4832	1.54231	2.47867	1.07773	2.29991	0.0214533	0.175461	Predicted
Pias2	43.9754	-0.410905	0.178715	-2.29922	0.0214922	0.175673	Coding
Fbxo18	27.581	-0.503676	0.219128	-2.29855	0.0215307	0.175881	Coding
Reep3	109.304	-0.283209	0.12331	-2.29672	0.0216348	0.176626	Coding
Dynlrb1	276.163	0.196127	0.0854087	2.29634	0.0216566	0.176697	Coding
Wdr18	72.8373	0.368969	0.160718	2.29575	0.0216899	0.176862	Coding
Psma7	1010.04	0.128106	0.0558241	2.29483	0.0217431	0.177101	Coding
BC005537	252.644	-0.193177	0.0841808	-2.29479	0.0217453	0.177101	Coding
Zfp759	2.99126	-1.62231	0.7071	-2.29432	0.0217724	0.177215	Coding
Ddi2	58.419	-0.362749	0.158166	-2.29347	0.0218208	0.177502	Coding
Gm13653	8.09411	-0.961637	0.41937	-2.29305	0.0218452	0.177593	Predicted
Map2k2	271.864	0.183031	0.0798688	2.29165	0.021926	0.178143	Coding
H2-Q10	21.5013	0.707685	0.308918	2.29085	0.021972	0.178411	Coding
Tef	8.66071	-0.913413	0.398916	-2.28974	0.0220365	0.178799	Coding
Gm8696	51.7545	-0.907623	0.396416	-2.28957	0.0220463	0.178799	Predicted
Gm11633	1.04024	2.57771	1.12593	2.28941	0.0220555	NA	Predicted
Fuom	21.9662	0.725406	0.316959	2.28864	0.0221003	0.17913	Coding
Ndufs7	272.805	0.191068	0.0835234	2.2876	0.0221611	0.179515	Coding
Yif1a	59.928	0.3847	0.168208	2.28705	0.022193	0.179667	Coding
Cox7b	1168.26	0.140024	0.061241	2.28644	0.0222286	0.179848	Coding
Creld2	110.608	0.305342	0.133563	2.28613	0.0222466	0.179885	Coding
Myo1g	132.347	0.26076	0.114078	2.28581	0.0222653	0.179928	Coding
Sytl3	153.131	0.347649	0.152105	2.28559	0.0222784	0.179928	Coding
Pde1b	3.75072	-1.4027	0.614046	-2.28436	0.0223502	0.180342	Coding
Nemp2	26.8656	-0.519191	0.227291	-2.28426	0.0223563	0.180342	Coding
Gm13545	2.98087	-1.65996	0.726858	-2.28375	0.0223865	0.180478	Predicted
Dpy19l3	20.2039	-0.603381	0.264286	-2.28307	0.0224265	0.180693	Coding
G430095P16Rik	2.16039	2.26519	0.992739	2.28176	0.0225037	0.181118	Coding
Ubtd2	2.3941	-1.79459	0.786507	-2.28172	0.0225061	0.181118	Coding
Kif18b	6.62003	1.38151	0.605791	2.2805	0.022578	0.181589	Coding
Slc25a42	8.30278	-0.943491	0.413994	-2.279	0.0226671	0.182198	Coding
Sumo1	569.844	0.149989	0.0658217	2.27872	0.0226835	0.182222	Coding
Fbxo9	83.9818	0.361427	0.158692	2.27754	0.0227542	0.182681	Coding
Nanog	1.30755	-2.56663	1.12749	-2.27641	0.0228214	0.183112	Coding
A530040E14Rik	26.0209	0.608639	0.267425	2.27592	0.0228505	0.183237	Noncoding
Zfp560	97.8911	0.291663	0.128175	2.27551	0.0228752	0.183327	Coding
Gm11824	1.10108	2.68112	1.17908	2.27391	0.0229711	NA	Predicted
Flnb	40.3166	-0.504383	0.221914	-2.27288	0.0230335	0.184486	Coding
Dicer1	56.0238	-0.375559	0.165299	-2.27199	0.0230872	0.184761	Coding
Vps52	45.2909	-0.420793	0.18522	-2.27186	0.0230951	0.184761	Coding
Gnpnat1	96.5332	0.282845	0.124524	2.27141	0.023122	0.184816	Coding
Eif3m	719.615	-0.133297	0.0586877	-2.27129	0.0231293	0.184816	Coding
Ktn1	114.421	-0.268847	0.11841	-2.27048	0.0231782	0.184972	Coding
Nrgn	1052.67	-0.379665	0.167222	-2.27043	0.0231816	0.184972	Coding
Stx7	47.1969	0.460108	0.20268	2.27012	0.0232005	0.184972	Coding
Gm17491	22.323	-0.718277	0.316412	-2.27007	0.0232034	0.184972	Predicted
Neurl3	335.17	-0.28053	0.12367	-2.26838	0.0233058	0.185602	Coding
Ssh3	4.4091	-1.2403	0.546793	-2.26832	0.0233098	0.185602	Coding
Zfp958	24.3256	0.580878	0.256197	2.26731	0.0233713	0.185982	Coding
Atl3	78.5959	-0.320916	0.141597	-2.26641	0.0234263	0.18631	Coding
Man2a1	117.488	-0.260196	0.114856	-2.2654	0.0234879	0.18669	Coding
Gm26141	1.50759	-2.26609	1.00108	-2.26365	0.0235956	0.187437	Predicted
Oaf	4.12287	-1.89305	0.836461	-2.26316	0.0236258	0.187488	Coding
Kcnj13	1.7607	-2.04571	0.903943	-2.2631	0.0236298	0.187488	Coding
Mdm4	126.817	-0.300401	0.132787	-2.26228	0.0236803	0.187779	Coding
Eif1b	195.516	0.206444	0.0912692	2.26192	0.0237022	0.187793	Coding
Ms4a4c	219.492	0.510567	0.225735	2.2618	0.0237098	0.187793	Coding
Gm29264	2.45541	-2.22518	0.984597	-2.25999	0.023822	0.188571	Predicted
Ankrd54	54.9625	0.378869	0.16766	2.25975	0.0238368	0.188578	Coding
Dixdc1	3.93966	-1.74455	0.772138	-2.25938	0.0238598	0.18865	Coding
Anapc5	225.641	0.244834	0.108386	2.25891	0.0238891	0.188771	Coding
Chn2	52.2914	-0.660543	0.292479	-2.25843	0.0239189	0.188897	Coding
Clip2	13.2558	-0.774338	0.342905	-2.25817	0.023935	0.188914	Coding
1110008P14Rik	221.351	0.226748	0.100467	2.25695	0.0240113	0.189125	Coding
Pmf1	69.2761	0.411593	0.182369	2.25692	0.0240132	0.189125	Coding
Tmem2	154.806	-0.420241	0.186221	-2.25668	0.0240282	0.189125	Coding
Auh	139.631	0.29362	0.130119	2.25656	0.0240357	0.189125	Coding
Tex30	79.1773	0.394579	0.174867	2.25645	0.0240422	0.189125	Coding
Psmd12	241.347	0.189367	0.0839242	2.2564	0.0240456	0.189125	Coding
1110008F13Rik	275.928	0.19168	0.0849737	2.25575	0.0240861	0.189182	Coding
Metrnl	64.3441	0.38767	0.171862	2.2557	0.0240894	0.189182	Coding
Dgkz	170.533	-0.213214	0.094526	-2.25562	0.0240947	0.189182	Coding
Zfp318	49.6316	-0.5893	0.261292	-2.25533	0.0241125	0.189212	Coding
Gm14845	1.01653	2.55379	1.13247	2.25506	0.0241297	NA	Predicted
Ska1	30.4952	0.704702	0.312524	2.25487	0.0241415	0.18933	Coding
Dhx38	35.7186	0.485269	0.215417	2.2527	0.0242781	0.190236	Coding
Hipk3	35.6304	-0.470924	0.209079	-2.25238	0.0242983	0.190236	Coding
Zbtb39	7.23752	-0.94813	0.420949	-2.25237	0.0242992	0.190236	Coding
Gm9892	4.5699	1.53779	0.682901	2.25185	0.024332	0.190301	Predicted
Gm15950	2.19099	-2.15473	0.95706	-2.25141	0.0243598	0.190301	Predicted
Ankrd12	277.987	-0.206743	0.0918292	-2.25138	0.0243614	0.190301	Coding
Tysnd1	30.645	0.503651	0.223711	2.25135	0.0243637	0.190301	Coding
Prdx3	152.959	0.257312	0.114332	2.25058	0.0244123	0.190571	Coding
Trbv5	1.94619	-2.05892	0.915114	-2.24991	0.0244548	0.19071	Coding
Actr10	308.322	0.206413	0.0917449	2.24985	0.0244583	0.19071	Coding
Rabggtb	134.335	0.272018	0.121008	2.24794	0.0245801	0.191549	Coding
Gm43721	5.36376	-1.38562	0.616675	-2.24692	0.0246449	0.191867	Predicted
Cd52	9561.69	0.158623	0.0705977	2.24686	0.0246492	0.191867	Coding
Bclaf1	231.188	-0.204454	0.0910053	-2.24662	0.0246646	0.191877	Coding
Cep162	25.59	-0.551155	0.245508	-2.24496	0.0247706	0.192591	Coding
Cecr6	1.69465	-2.06479	0.920263	-2.2437	0.0248517	0.19311	Coding
E2f7	6.43499	1.19133	0.531312	2.24224	0.0249458	0.193648	Coding
Arl6ip1	1143.28	0.276715	0.123413	2.24218	0.0249495	0.193648	Coding
Gm43042	4.88733	-1.27534	0.568878	-2.24185	0.0249713	0.193706	Predicted
Tmem192	81.3288	0.320266	0.142894	2.24129	0.0250075	0.193876	Coding
Prnp	25.9005	-0.781038	0.348533	-2.24093	0.0250306	0.193944	Coding
Dnajb5	9.56751	-0.94105	0.42004	-2.24038	0.025066	0.194108	Coding
Gm26853	56.4723	-0.396504	0.177037	-2.23966	0.0251127	0.194358	Predicted
Gm15483	7.13521	1.17554	0.524967	2.23927	0.0251384	0.194446	Predicted
Zc3h13	179.47	-0.239782	0.107191	-2.23696	0.0252889	0.195498	Coding
AI314180	100.189	-0.280397	0.125389	-2.23623	0.0253369	0.195682	Coding
Hbegf	15.6868	-0.785516	0.351279	-2.23616	0.0253415	0.195682	Coding
Setd7	40.8643	-0.470877	0.210649	-2.23537	0.0253933	0.19597	Coding
Rbm22	151.457	-0.237353	0.106211	-2.23473	0.0254353	0.196182	Coding
Axl	19.6951	-0.618819	0.277046	-2.23363	0.0255073	0.196626	Coding
Mmachc	2.05432	2.19301	0.982497	2.23207	0.0256101	0.197258	Coding
Cdca2	20.4516	0.666133	0.298587	2.23095	0.0256846	0.197258	Coding
Nudcd1	20.1652	0.628119	0.281553	2.23091	0.0256872	0.197258	Coding
Gm42715	7.78814	-1.07326	0.481088	-2.2309	0.0256875	0.197258	Predicted
2610524H06Rik	77.6032	0.427309	0.19155	2.23079	0.0256949	0.197258	Coding
Jdp2	73.1087	-0.367792	0.164892	-2.2305	0.0257141	0.197258	Coding
Sf3b1	781.492	0.12056	0.0540553	2.23032	0.0257265	0.197258	Coding
Poldip3	59.8829	-0.350195	0.157029	-2.23013	0.0257387	0.197258	Coding
Adgrl1	12.2539	-0.864875	0.387847	-2.22994	0.0257515	0.197258	Coding
Tcf4	10.2584	-0.992753	0.445217	-2.22982	0.0257596	0.197258	Coding
Gm38037	1.92987	-2.46133	1.10394	-2.22959	0.0257748	0.197258	Predicted
Gm6210	7.94291	-0.907919	0.407222	-2.22954	0.0257779	0.197258	Predicted
Hist1h2an	6.1791	-1.20526	0.540615	-2.22942	0.0257858	0.197258	Coding
Gm20045	11.0197	0.905967	0.406425	2.22911	0.0258066	0.197258	Predicted
Plin2	56.8481	0.509185	0.228427	2.22909	0.0258078	0.197258	Coding
Ssb	622.075	0.129677	0.0581977	2.22821	0.0258666	0.197507	Coding
Melk	20.0855	0.655146	0.294029	2.22816	0.0258695	0.197507	Coding
Gm5526	1.59943	2.49007	1.11795	2.22735	0.0259241	0.197812	Predicted
Rnf44	56.3261	-0.365294	0.164054	-2.22667	0.0259694	0.198046	Coding
0610012G03Rik	150.784	0.242952	0.10914	2.22607	0.0260096	0.198241	Coding
Fam107b	459.359	0.183026	0.0823286	2.22311	0.0262084	0.199494	Coding
AC156576.4	3.84704	1.91019	0.8593	2.22296	0.0262187	0.199494	Noncoding
Twf2	117.803	0.271111	0.121966	2.22283	0.0262272	0.199494	Coding
Slc22a5	3.32647	-1.47825	0.665055	-2.22275	0.0262329	0.199494	Coding
Ogdh	126.558	-0.245673	0.110547	-2.22235	0.0262599	0.199578	Coding
Psmb1	1161.66	0.117226	0.0527534	2.22215	0.0262734	0.199578	Coding
Hat1	146.448	0.261461	0.117762	2.22025	0.026402	0.200442	Coding
Dnaja4	55.1179	-0.621295	0.279941	-2.21938	0.026461	0.200777	Coding
Hadh	61.6347	0.369052	0.166353	2.21849	0.0265218	0.201099	Coding
Fam96b	236.532	0.203292	0.0916513	2.2181	0.0265477	0.201099	Coding
Pla2g16	572.235	0.207347	0.0934794	2.2181	0.026548	0.201099	Coding
Atp6v1a	103.64	0.282111	0.127221	2.21749	0.0265897	0.201303	Coding
Cd82	381.453	-0.220437	0.0994674	-2.21617	0.0266796	0.201871	Coding
Gm26525	5.04239	-1.31109	0.592188	-2.21397	0.0268307	0.202901	Predicted
Lsm12	342.513	0.184198	0.0832817	2.21174	0.0269845	0.203943	Coding
Arap1	22.4975	-0.540476	0.244389	-2.21154	0.0269987	0.203943	Coding
Zdhhc5	47.8935	-0.426769	0.19302	-2.21101	0.027035	0.204103	Coding
Ppp4c	190.093	0.220688	0.0998311	2.21061	0.0270627	0.204126	Coding
Znf41-ps	2.83387	-1.70055	0.769295	-2.21053	0.0270681	0.204126	Noncoding
Galns	25.9929	0.580477	0.262758	2.20917	0.0271629	0.204716	Coding
Leng9	26.3338	-0.505329	0.228785	-2.20875	0.0271921	0.204716	Coding
Tsc22d3	132.182	0.364906	0.165216	2.20866	0.0271984	0.204716	Coding
Lin9	17.607	0.662698	0.300062	2.20854	0.0272069	0.204716	Coding
AK157302	10.5584	-0.820838	0.371824	-2.2076	0.0272724	0.205096	Coding
Acadvl	77.4716	0.326854	0.148124	2.20663	0.0273402	0.205492	Coding
Slc16a13	10.4699	-0.883041	0.400283	-2.20604	0.027381	0.205618	Coding
Mrpl14	197.563	0.211481	0.095871	2.20589	0.0273914	0.205618	Coding
P3h2	8.29779	-1.21924	0.552861	-2.20533	0.0274308	0.205618	Coding
Ssna1	186.345	0.232122	0.105255	2.20533	0.0274309	0.205618	Coding
Aldoa	2583.46	0.210993	0.0956842	2.2051	0.0274472	0.205618	Coding
Renbp	3.47557	1.72122	0.780566	2.20509	0.0274481	0.205618	Coding
Ppih	96.2669	0.343662	0.155903	2.20434	0.0275006	0.205829	Coding
Zfp511	80.4713	0.310951	0.141069	2.20425	0.0275067	0.205829	Coding
Prim2	26.1038	0.635964	0.288654	2.20321	0.02758	0.206264	Coding
Gm10616	3.29093	-1.66675	0.756648	-2.20281	0.0276082	0.206361	Predicted
Zfas1	243.353	-0.264159	0.119981	-2.20167	0.0276883	0.206786	Noncoding
Esf1	122.686	0.285917	0.129871	2.20154	0.0276976	0.206786	Coding
Plekhb2	155.792	-0.256809	0.11666	-2.20136	0.0277109	0.206786	Coding
Fam189b	128.42	0.38637	0.175539	2.20104	0.0277329	0.206836	Coding
Nup50	103.39	0.317346	0.144275	2.19959	0.0278357	0.207422	Coding
Notch2	41.7175	-0.421701	0.191741	-2.19933	0.0278547	0.207422	Coding
Tmem57	29.9205	-0.494492	0.224842	-2.19929	0.0278575	0.207422	Coding
Zzz3	52.2907	-0.384233	0.174809	-2.19801	0.0279483	0.207932	Coding
Src	1.79248	-2.08501	0.948639	-2.19789	0.0279566	0.207932	Coding
Acly	118.618	-0.270315	0.123035	-2.19706	0.0280161	0.20826	Coding
Gm15032	1.04861	2.5739	1.17162	2.19687	0.0280299	NA	Predicted
Clpp	64.2816	0.340883	0.155182	2.19667	0.0280443	0.208355	Coding
Zfp512	16.1086	0.69163	0.314987	2.19574	0.0281106	0.208734	Coding
Mbd4	15.4487	0.702588	0.32006	2.19517	0.0281511	0.208901	Coding
Gm9803	19.4039	-0.58284	0.265558	-2.19478	0.0281795	0.208901	Predicted
AC151982.1	2.56957	-1.55645	0.709219	-2.1946	0.0281924	0.208901	Noncoding
Calm3	574.287	0.218527	0.0995764	2.19456	0.0281948	0.208901	Coding
Taf12	142.208	0.231676	0.105585	2.19421	0.0282203	0.208975	Coding
Mrpl21	209.484	0.200803	0.0915765	2.19273	0.0283265	0.209647	Coding
Arf5	1197.68	0.14008	0.0638944	2.19236	0.0283532	0.20973	Coding
Mut	39.6265	-0.461053	0.210342	-2.19192	0.0283856	0.209761	Coding
Slc25a39	115.503	0.262735	0.119867	2.19188	0.0283883	0.209761	Coding
Nup98	84.7115	-0.295552	0.134888	-2.19109	0.0284454	0.210068	Coding
Gpr68	162.153	-0.292494	0.133536	-2.19037	0.0284971	0.210335	Coding
Dnajc11	29.5952	0.505895	0.230997	2.19005	0.0285203	0.210392	Coding
BC052040	10.4774	0.879182	0.401527	2.18959	0.0285536	0.210523	Coding
Cyb5b	111.714	0.273952	0.125169	2.18866	0.0286217	0.21091	Coding
Rgs8	36.3643	-0.693761	0.317018	-2.1884	0.0286407	0.210935	Coding
Zfp384	31.817	-0.459105	0.209974	-2.18649	0.02878	0.211846	Coding
Ccdc124	249.319	0.223754	0.102419	2.18469	0.0289116	0.212639	Coding
H2-K2	20.5189	-0.621209	0.28436	-2.18459	0.0289191	0.212639	Noncoding
Timm10	68.3424	0.343178	0.157156	2.18368	0.0289855	0.213011	Coding
Ceacam16	58.7728	-0.564824	0.258683	-2.18346	0.0290021	0.213017	Coding
Rb1	41.1536	0.426318	0.195287	2.18304	0.029033	0.213107	Coding
Emc9	19.1668	0.659498	0.302125	2.18286	0.0290458	0.213107	Coding
Ckap2l	34.3954	0.58563	0.268319	2.18259	0.0290657	0.213138	Coding
Wrb	5.34902	-1.14644	0.525639	-2.18105	0.0291796	0.213858	Coding
Rpap3	48.1943	-0.372234	0.170736	-2.18017	0.0292445	0.213881	Coding
Bola2	559.24	-0.180925	0.0829874	-2.18015	0.0292464	0.213881	Coding
Lck	903.233	0.124797	0.0572455	2.18004	0.0292546	0.213881	Coding
Dcaf13	90.8513	0.290128	0.133087	2.17998	0.0292587	0.213881	Coding
Eif3j2	76.748	-0.420778	0.193023	-2.17994	0.0292617	0.213881	Coding
Anp32b-ps1	1.07646	2.63414	1.20845	2.17976	0.0292751	NA	Noncoding
Fhl3	7.15588	-0.963309	0.442304	-2.17794	0.0294107	0.214848	Coding
Commd3	257.878	0.185771	0.0853045	2.17773	0.0294258	0.214848	Coding
Nop10	495.406	0.206809	0.0949935	2.17709	0.0294739	0.215083	Coding
Ccdc12	422.147	0.181141	0.0832453	2.17599	0.0295563	0.21555	Coding
Gm37529	56.4299	-0.384707	0.176811	-2.17581	0.0295697	0.21555	Predicted
Gm38366	6.7996	-0.943934	0.433875	-2.17559	0.0295859	0.215552	Predicted
Chd1l	30.0153	0.507894	0.233597	2.17423	0.0296877	0.216128	Coding
Snrk	59.2123	-0.331222	0.152348	-2.17411	0.0296969	0.216128	Coding
Brix1	119.057	0.312332	0.143708	2.17338	0.0297516	0.21641	Coding
Spcs2	879.276	0.157458	0.0724596	2.17305	0.0297768	0.216477	Coding
Gm14150	1.12655	2.68439	1.23659	2.17079	0.0299468	NA	Predicted
Trav13-1	5.1462	1.72478	0.79467	2.17044	0.0299734	0.217789	Coding
Gm36930	4.73419	-1.38103	0.636533	-2.16961	0.0300361	0.218014	Predicted
Samd4	1.41275	-2.394	1.10342	-2.16961	0.0300365	0.218014	Coding
Tmc6	84.339	-0.316968	0.146137	-2.16897	0.0300847	0.218247	Coding
Gm44967	4.89065	-1.15017	0.530488	-2.16813	0.0301485	0.218593	Predicted
Bak1	117.254	0.263837	0.121704	2.16786	0.0301691	0.218625	Coding
Prpf38a	98.8554	0.275896	0.127287	2.16751	0.0301958	0.218701	Coding
Etaa1	34.0166	0.486213	0.22456	2.16518	0.0303738	0.219873	Coding
Foxn2	57.0026	-0.447178	0.206586	-2.16461	0.0304179	0.219978	Coding
Plcg1	98.1809	-0.27275	0.126007	-2.16457	0.0304207	0.219978	Coding
Zfp593	92.829	0.308252	0.142433	2.16419	0.03045	0.220072	Coding
Twist1	2.316	-2.14685	0.992153	-2.16383	0.0304773	0.220152	Coding
Zfp317	20.8613	-0.547809	0.253228	-2.1633	0.030518	0.220328	Coding
Bin2	296.851	-0.168256	0.0778212	-2.16208	0.0306117	0.220887	Coding
Gm38302	11.8571	-0.860335	0.398033	-2.16147	0.030659	0.221111	Predicted
Med21	161.006	0.254121	0.117618	2.16056	0.0307293	0.221361	Coding
Psph	143.878	0.23353	0.108092	2.16047	0.0307363	0.221361	Coding
Babam1	94.9228	0.31384	0.14527	2.16039	0.0307427	0.221361	Coding
Cdk2ap2	412.533	0.233917	0.108293	2.16004	0.0307695	0.221436	Coding
Efcab11	4.13212	1.46919	0.680401	2.15929	0.0308274	0.221735	Coding
D230025D16Rik	14.9009	-0.702289	0.325347	-2.15859	0.0308821	0.22201	Coding
Gm7251	1.04377	2.55134	1.18212	2.15827	0.030907	NA	Predicted
Tm2d2	63.6894	0.347059	0.160811	2.15818	0.0309137	0.222012	Coding
Cirbp	240.425	0.217752	0.100897	2.15816	0.0309151	0.222012	Coding
Racgap1	113.48	0.316921	0.146894	2.15748	0.0309684	0.22227	Coding
Gm15706	10.5899	-0.837984	0.388445	-2.15728	0.0309839	0.22227	Predicted
4930526A20Rik	1.61433	-2.06638	0.95826	-2.15638	0.0310537	0.222653	Noncoding
Kif5b	341.426	0.189361	0.0878609	2.15524	0.0311434	0.223127	Coding
Snf8	238.462	0.187681	0.0870912	2.15499	0.0311627	0.223127	Coding
Dgkh	11.4996	-0.774217	0.359281	-2.1549	0.0311693	0.223127	Coding
AC135377.1	3.28612	-1.42992	0.663638	-2.15466	0.0311882	0.223144	Noncoding
Scamp3	183.038	0.244471	0.11348	2.15431	0.0312157	0.223204	Coding
Mrpl33	881.442	0.130888	0.0607674	2.15392	0.0312466	0.223204	Coding
Erbin	101.575	-0.365036	0.169488	-2.15376	0.0312587	0.223204	Coding
Asns	18.9105	0.730322	0.339098	2.15372	0.0312625	0.223204	Coding
Zkscan8	15.4922	-0.674624	0.313327	-2.1531	0.0313109	0.223432	Coding
Trav2	1.64654	3.27232	1.52001	2.15283	0.0313321	0.223459	Coding
Gale	22.9127	0.573738	0.266528	2.15263	0.0313476	0.223459	Coding
Gm23054	2.17707	-1.79817	0.835855	-2.1513	0.0314528	0.224091	Predicted
Nsun6	41.226	-0.415647	0.193244	-2.1509	0.0314843	0.224197	Coding
Tomm20	794.666	0.140988	0.0655859	2.14966	0.0315821	0.224775	Coding
Gm12005	0.973737	2.51106	1.16812	2.14966	0.0315824	NA	Predicted
Glmp	194.821	0.226442	0.105354	2.14933	0.031608	0.224842	Coding
Nol12	129.195	0.25262	0.117567	2.14873	0.0316556	0.225062	Coding
Fam120a	169.571	-0.207172	0.0964265	-2.1485	0.0316739	0.225074	Coding
Sar1a	254.043	0.17389	0.0809663	2.14768	0.0317391	0.225419	Coding
Dennd4b	28.8912	-0.485522	0.226161	-2.1468	0.0318094	0.225708	Coding
Atf7	39.6101	-0.422486	0.196803	-2.14675	0.0318132	0.225708	Coding
Srp14	724.493	0.190411	0.0887322	2.1459	0.0318808	0.226046	Coding
Gstk1	5.03917	1.27551	0.59444	2.14573	0.0318942	0.226046	Coding
Gzmm	27.7219	0.70872	0.330636	2.14351	0.0320726	0.227192	Coding
Fam208a	80.8507	-0.298608	0.139327	-2.14321	0.0320961	0.22724	Coding
Srp19	346.131	0.182728	0.0852967	2.14227	0.032172	0.227658	Coding
Gm2962	0.963829	2.44789	1.14314	2.14138	0.0322431	NA	Predicted
Apip	39.2394	0.421262	0.196766	2.14093	0.0322797	0.228232	Coding
Cbr1	34.2857	0.454933	0.212502	2.14084	0.0322869	0.228232	Coding
Rps15-ps2	15.1941	0.69846	0.326337	2.1403	0.0323306	0.2283	Ribosomal
Irak1	136.903	-0.23847	0.111424	-2.1402	0.0323382	0.2283	Coding
Ten1	117.068	0.279434	0.130571	2.1401	0.032347	0.2283	Coding
Psma4	690.314	0.136762	0.0639157	2.13973	0.0323769	0.228392	Coding
C1d	174.3	0.207522	0.0970022	2.13935	0.0324074	0.228488	Coding
2310011J03Rik	110.494	0.262979	0.122946	2.13899	0.0324368	0.228577	Coding
Srp54b	5.93544	-1.01554	0.474986	-2.13804	0.0325136	0.228891	Coding
Pcgf2	15.7417	-0.602009	0.281596	-2.13785	0.0325293	0.228891	Coding
Il27ra	146.192	-0.231226	0.10816	-2.13781	0.0325321	0.228891	Coding
Uhrf1bp1l	60.5412	-0.343639	0.160772	-2.13743	0.032563	0.228989	Coding
Gm20443	1.00029	2.49353	1.16666	2.13732	0.0325717	NA	Predicted
Endog	25.0648	0.60568	0.283504	2.1364	0.0326465	0.229457	Coding
Nrm	68.2854	0.340392	0.159446	2.13485	0.0327732	0.230228	Coding
Ndufa5	303.995	0.192383	0.090129	2.13453	0.0327992	0.230292	Coding
Cox5b	1418.86	0.137077	0.064233	2.13405	0.0328385	0.230384	Coding
Dnttip2	140.694	0.254909	0.119455	2.13393	0.0328486	0.230384	Coding
Cpa2	3.28024	-1.34129	0.628608	-2.13375	0.0328634	0.230384	Coding
Ncaph	28.8906	0.502859	0.235909	2.13158	0.033041	0.231452	Coding
Gtf2e2	118.494	0.261321	0.122608	2.13136	0.0330597	0.231452	Coding
Ubp1	69.2203	-0.339986	0.159536	-2.13109	0.0330817	0.231452	Coding
Ddx46	216.945	0.220347	0.103399	2.13104	0.0330859	0.231452	Coding
Gpr21	3.61304	-1.433	0.672513	-2.13081	0.0331049	0.231452	Coding
Ccpg1os	9.56073	-0.807781	0.379125	-2.13065	0.0331183	0.231452	Coding
Hdgf	397.524	0.174258	0.0818462	2.12909	0.0332471	0.232045	Coding
Mpp1	26.0999	0.576384	0.270741	2.12891	0.0332616	0.232045	Coding
Gm10221	73.2428	-0.293771	0.137991	-2.12891	0.0332616	0.232045	Predicted
Sympk	47.2193	-0.394171	0.185162	-2.12879	0.0332717	0.232045	Coding
AC164623.1	64.9742	-0.55228	0.259502	-2.12823	0.0333181	0.23225	Noncoding
Rpl13-ps3	9.97214	0.846281	0.397781	2.1275	0.0333782	0.232549	Ribosomal
Xcl1	1376.63	-0.700752	0.329466	-2.12694	0.0334253	0.232757	Coding
Bst2	312.897	0.338846	0.159349	2.12644	0.0334668	0.232881	Coding
Gon4l	26.9597	-0.505246	0.237616	-2.12631	0.0334776	0.232881	Coding
1700030C10Rik	1.34437	2.97224	1.39805	2.12599	0.0335037	0.232943	Noncoding
Snapc5	170.929	0.261057	0.122836	2.12524	0.0335665	0.23326	Coding
Twf1	38.0464	0.520302	0.244914	2.12443	0.0336346	0.233369	Coding
Slc44a2	111.971	-0.300364	0.141401	-2.1242	0.0336536	0.233369	Coding
Gm13981	1.64262	-2.17519	1.02413	-2.12393	0.0336756	0.233369	Predicted
Celsr1	25.9023	-0.520694	0.245158	-2.12391	0.0336774	0.233369	Coding
Rpl36-ps10	1.5816	-2.15063	1.0127	-2.12366	0.0336986	0.233369	Ribosomal
Mau2	78.4412	-0.286687	0.135011	-2.12343	0.0337178	0.233369	Coding
Gm28535	1.6035	-2.07411	0.976785	-2.12341	0.0337197	0.233369	Predicted
Gm5575	4.94447	-1.18459	0.557875	-2.1234	0.03372	0.233369	Predicted
Tmem256	382.125	-0.193591	0.0911931	-2.12287	0.0337645	0.233406	Coding
Hspe1	1496.01	0.157957	0.0744077	2.12286	0.0337659	0.233406	Coding
Gm20186	57.729	-0.490276	0.230966	-2.12272	0.0337771	0.233406	Predicted
Gm37090	5.72589	-1.20462	0.567589	-2.12234	0.0338094	0.233473	Predicted
Gm42699	2.64317	-1.57557	0.742463	-2.12208	0.033831	0.233473	Predicted
Baz2a	99.5769	-0.37575	0.177074	-2.12199	0.0338384	0.233473	Coding
Gm6335	2.74945	-1.58717	0.748089	-2.12163	0.0338691	0.233565	Predicted
Gm38244	1.02893	2.52791	1.19197	2.12079	0.0339397	NA	Predicted
Rpl7a-ps11	0.958902	2.44404	1.15256	2.12054	0.0339608	NA	Ribosomal
Cenpa	479.585	0.280604	0.132334	2.12043	0.0339701	0.234045	Coding
Mrpl20	314.76	0.161742	0.076282	2.12032	0.0339789	0.234045	Coding
Nelfcd	48.8443	0.424593	0.200262	2.12019	0.0339904	0.234045	Coding
Rpp21	182.827	0.214375	0.101162	2.11912	0.0340805	0.234301	Coding
BC002163	13.4444	0.708889	0.334531	2.11905	0.0340858	0.234301	Noncoding
Nufip2	127.842	-0.253048	0.119422	-2.11894	0.0340958	0.234301	Coding
Orai2	55.3121	-0.353137	0.166669	-2.11879	0.0341081	0.234301	Coding
Mcts1	250.88	0.195107	0.0920937	2.11857	0.0341269	0.234301	Coding
Rad18	29.2713	0.562375	0.265469	2.11842	0.0341392	0.234301	Coding
[truncated: 12,389 more rows]

## Sheet: Combo vs aPDL1
	baseMean	log2FoldChange	lfcSE	stat	pvalue	padj	type
Gm8624	268.87	-0.764165	0.0952823	-8.02001	1.05739e-15	7.87227e-12	Predicted
Gm10076	2043.59	0.30411	0.0415791	7.31401	2.59284e-13	9.65185e-10	Predicted
Rps2-ps10	202.371	-0.694739	0.0996095	-6.97462	3.06695e-12	7.61114e-09	Ribosomal
Rps10-ps2	933.346	0.382346	0.0557595	6.85704	7.02998e-12	1.30845e-08	Ribosomal
Mir703	386.443	-0.562784	0.0837303	-6.72138	1.80006e-11	2.68029e-08	Noncoding
Rpl23a	6748.77	-0.271007	0.0411865	-6.58	4.70443e-11	5.83742e-08	Ribosomal
Tpt1-ps3	1024.79	0.368212	0.0602824	6.10811	1.00815e-09	1.07224e-06	Noncoding
Rpl10-ps3	142.286	-0.623775	0.108496	-5.74927	8.96294e-09	8.34113e-06	Ribosomal
Arl4d	135.178	-0.662002	0.116513	-5.68179	1.33294e-08	1.10264e-05	Coding
mt-Atp6	702.277	-0.410424	0.0748423	-5.48385	4.16179e-08	3.09845e-05	Mitochondrial
Wdr89	954.438	-0.360584	0.0680707	-5.2972	1.17591e-07	7.82767e-05	Coding
Rpl5	8171.74	-0.234709	0.044416	-5.28433	1.26168e-07	7.82767e-05	Ribosomal
AL607105.1	244.56	-0.456336	0.0875788	-5.21057	1.88261e-07	0.000107815	Coding
Aurkb	183.8	-0.532355	0.103133	-5.16184	2.44536e-07	0.000130041	Coding
Rps23-ps1	527.642	-0.35511	0.0697889	-5.08834	3.61202e-07	0.000179277	Ribosomal
Rps19-ps6	531.13	0.394122	0.0780931	5.04682	4.49221e-07	0.000209028	Ribosomal
Trac	1255.98	0.36728	0.0733937	5.00424	5.60841e-07	0.000245615	Coding
Rpl18-ps2	485.312	0.320894	0.0649206	4.94287	7.69807e-07	0.000318401	Ribosomal
Wisp1	175.601	-0.779049	0.165137	-4.71759	2.38659e-06	0.000935168	Coding
Gm10093	165.025	-0.470077	0.0998932	-4.70579	2.52883e-06	0.000941358	Predicted
Gm5292	51.1304	0.868014	0.186721	4.64871	3.34011e-06	0.00118415	Predicted
D1Ertd622e	43.221	0.903216	0.194562	4.64231	3.44539e-06	NA	Coding
Rps3a2	1296.51	0.276084	0.059907	4.60855	4.05488e-06	0.00137221	Ribosomal
Fam178b	31.3879	-1.94777	0.428177	-4.54899	5.39035e-06	NA	Coding
Rpl36al	1639.98	-0.214071	0.04711	-4.54407	5.51778e-06	0.00173975	Ribosomal
Gm10827	57.0891	-0.851375	0.187501	-4.54064	5.60832e-06	0.00173975	Predicted
Ccna2	303.981	-0.433072	0.0964815	-4.48865	7.16751e-06	0.00213449	Coding
H2-Q4	991.134	0.299272	0.0669796	4.4681	7.89176e-06	0.00225978	Coding
Mtus2	10.7602	2.79764	0.634002	4.41267	1.02103e-05	NA	Coding
Slc16a11	139.603	-0.874322	0.199457	-4.38351	1.16782e-05	0.00322017	Coding
H2-Q7	2006.26	0.365766	0.0843926	4.33411	1.46354e-05	0.00377843	Coding
Srgn	9256.78	0.241924	0.0558345	4.33287	1.47179e-05	0.00377843	Coding
Gm6472	1252.9	0.287438	0.0669359	4.29423	1.75302e-05	0.00435041	Predicted
Spc25	150.884	-0.548023	0.128329	-4.27045	1.95075e-05	0.00462253	Coding
Plk1	89.5066	-0.599649	0.140755	-4.26022	2.04223e-05	0.00462253	Coding
Rpl21	11545.5	0.223296	0.0524232	4.25949	2.04894e-05	0.00462253	Ribosomal
Sytl1	84.8565	0.565863	0.133352	4.24338	2.20174e-05	0.00482117	Coding
Gm9625	161.774	0.533174	0.125849	4.23663	2.269e-05	0.00482648	Predicted
Eno3	250.913	-0.83515	0.198222	-4.2132	2.51776e-05	0.00520686	Coding
Tuba1b	2378.17	-0.35054	0.0838939	-4.17837	2.93601e-05	0.00590772	Coding
CAAA01194877.1	127.274	0.546259	0.131404	4.15709	3.22332e-05	0.00626003	Noncoding
Dbi	1578.4	-0.470076	0.113185	-4.15315	3.27926e-05	0.00626003	Coding
Tpx2	257.539	-0.493103	0.118976	-4.14456	3.40465e-05	0.00633691	Coding
Ifngr1	1638.35	0.46949	0.114147	4.11303	3.90498e-05	0.00689346	Coding
Nusap1	404.78	-0.450879	0.109678	-4.11092	3.94092e-05	0.00689346	Coding
Ncaph	92.8412	-0.586721	0.142805	-4.10855	3.98145e-05	0.00689346	Coding
Rps26-ps1	566.137	-0.254281	0.0621303	-4.0927	4.26375e-05	0.00713614	Ribosomal
Nap1l1	1474.26	-0.247686	0.0605784	-4.08868	4.33828e-05	0.00713614	Coding
Cd200	537.326	-0.463869	0.113556	-4.08492	4.40917e-05	0.00713614	Coding
AC121801.1	124.457	0.659927	0.161753	4.07986	4.50634e-05	0.00713824	Noncoding
Cdca8	381.558	-0.50026	0.123177	-4.06131	4.87971e-05	0.0074176	Coding
Zdhhc18	866.175	0.274084	0.0674884	4.06121	4.88196e-05	0.0074176	Coding
Ccdc85b	66.207	0.6789	0.16959	4.00318	6.24969e-05	0.00887774	Coding
Gm37248	258.322	0.602838	0.150619	4.0024	6.27041e-05	0.00887774	Predicted
Ccdc34	277.506	-0.43463	0.108617	-4.0015	6.2942e-05	0.00887774	Coding
Cd44	574.869	-0.279171	0.0697833	-4.00053	6.31995e-05	0.00887774	Coding
Gm13226	76.758	0.575129	0.144154	3.98969	6.61592e-05	0.00912139	Predicted
Dtx1	12.5488	1.97382	0.496389	3.97637	6.99766e-05	NA	Coding
Frat2	61.9718	0.971501	0.244499	3.97344	7.08421e-05	0.00958944	Coding
Gm43123	6.31939	-3.71243	0.936996	-3.96206	7.43065e-05	NA	Predicted
Hmmr	188.302	-0.486562	0.123114	-3.95212	7.74613e-05	0.0101612	Coding
A430093F15Rik	230.513	-0.587005	0.148568	-3.95109	7.77953e-05	0.0101612	Noncoding
Cdc45	111.811	-0.583057	0.149012	-3.91282	9.12236e-05	0.0117096	Coding
Dennd5b	12.4173	-1.68269	0.432059	-3.8946	9.83627e-05	NA	Coding
Rpl31	3728.26	-0.151514	0.0389644	-3.88853	0.000100852	0.0127261	Ribosomal
Rpl26	591.348	-0.28332	0.0732719	-3.86669	0.000110321	0.01349	Ribosomal
H2-T10	325.988	0.361413	0.0935286	3.8642	0.000111454	0.01349	Coding
H2-Q6	335.667	0.340027	0.0880383	3.86226	0.000112341	0.01349	Coding
Gm10221	128.243	0.427064	0.112225	3.80544	0.00014155	0.0167276	Predicted
Prkca	494.087	0.314527	0.0830399	3.78766	0.000152075	0.0176906	Coding
Mlf1	66.1359	-0.812534	0.214864	-3.78161	0.000155816	0.0178469	Coding
Cdk1	416.421	-0.435555	0.115787	-3.76169	0.000168768	0.0190115	Coding
Nt5e	125.64	-0.933268	0.248403	-3.75707	0.000171917	0.0190115	Coding
Iigp1	108.445	0.687706	0.183326	3.75128	0.000175932	0.0190115	Coding
Ccnb1	176.137	-0.496108	0.132264	-3.7509	0.000176198	0.0190115	Coding
Rrm2	516.704	-0.438575	0.11705	-3.7469	0.000179033	0.0190415	Coding
Rnaset2a	492.229	-0.316891	0.0851569	-3.72126	0.000198231	0.0207863	Coding
S1pr4	258.343	0.456605	0.12301	3.71193	0.000205684	0.0212683	Coding
Eif1	9995.39	0.125838	0.0340062	3.70044	0.000215224	0.0218812	Coding
Arhgdib	4518.88	0.260752	0.0705157	3.69778	0.00021749	0.0218812	Coding
Icos	1518.68	0.512824	0.139126	3.68603	0.000227776	0.0226106	Coding
Trav17	26.2545	6.76229	1.84583	3.66355	0.00024874	NA	Coding
Incenp	266.835	-0.33029	0.090314	-3.65713	0.000255055	0.0249853	Coding
Rps27rt	1703.75	-0.247347	0.0677004	-3.65356	0.000258633	0.0250067	Ribosomal
Snx20	194.348	0.497987	0.136857	3.63875	0.000273964	0.0259689	Coding
Fam3c	240.223	-0.329332	0.0905442	-3.63725	0.00027556	0.0259689	Coding
Gm5561	25.3907	0.900505	0.248766	3.61988	0.000294739	NA	Predicted
Btg2	2582.05	0.241335	0.0666747	3.61958	0.000295077	0.0274606	Coding
Pkp4	111.759	-0.662592	0.183433	-3.61217	0.000303641	0.0279088	Coding
Lat	1472.56	0.284953	0.0792057	3.59763	0.000321128	0.0291561	Coding
Serpinb1a	41.2437	1.21633	0.338558	3.59267	0.00032731	NA	Coding
Rcc1	105.699	-0.460139	0.128436	-3.58262	0.00034016	0.030512	Coding
Rpa3	488.091	-0.282455	0.0789611	-3.57714	0.000347376	0.0307776	Coding
Ndufab1	755.341	-0.216404	0.0605942	-3.57137	0.000355118	0.0307776	Coding
Cd81	93.924	-0.935076	0.261847	-3.57107	0.000355523	0.0307776	Coding
A930024E05Rik	103.209	0.432991	0.121724	3.55715	0.000374895	0.0320815	Noncoding
Dclk1	26.9994	-1.3727	0.38699	-3.54711	0.000389485	NA	Coding
7330423F06Rik	90.3815	0.792509	0.223459	3.54656	0.000390303	0.0330205	Noncoding
Slamf7	228.15	0.677487	0.191544	3.53698	0.000404732	0.0332931	Coding
Hacd2	350.125	-0.413823	0.11703	-3.53604	0.000406174	0.0332931	Coding
Exosc2	239.504	-0.423689	0.119837	-3.53554	0.00040694	0.0332931	Coding
Gimap6	994.249	0.477045	0.135325	3.52519	0.000423174	0.0342449	Coding
Mad2l1	223.447	-0.390562	0.111321	-3.50842	0.000450774	0.0360862	Coding
Rrm1	341.793	-0.374502	0.106834	-3.50547	0.000455807	0.0361009	Coding
Klf3	62.7713	1.06485	0.304349	3.49879	0.000467367	0.0366268	Coding
Rpl37rt	763.479	-0.224093	0.0644425	-3.47742	0.000506265	0.0392619	Ribosomal
Gm11808	312.516	-0.276968	0.0797504	-3.47294	0.000514796	0.0393803	Predicted
Birc5	733.503	-0.373081	0.107556	-3.46872	0.000522948	0.0393803	Coding
Gimap9	477.129	0.362049	0.104386	3.46835	0.00052366	0.0393803	Coding
Gm8430	409.329	-0.266753	0.0769904	-3.46476	0.000530706	0.039511	Predicted
Rasgrp2	92.1981	1.03136	0.298065	3.4602	0.000539784	0.039789	Coding
Cks2	659.004	-0.321433	0.0931202	-3.4518	0.000556852	0.0399	Coding
Ptprs	198.84	-0.532462	0.154352	-3.44965	0.000561309	0.0399	Coding
Satb1	956.404	0.362782	0.105182	3.4491	0.000562453	0.0399	Coding
Gm9294	173.285	0.356515	0.103369	3.44897	0.000562726	0.0399	Predicted
Rps13-ps2	375.452	-0.282016	0.0819625	-3.44079	0.000580019	0.0407381	Ribosomal
Hbp1	118.9	0.479419	0.139472	3.43739	0.00058736	0.0408682	Coding
Kif20b	166.328	-0.338293	0.0986999	-3.42749	0.00060918	0.0419939	Coding
Ezh2	572.151	-0.267498	0.0782245	-3.41962	0.000627081	0.0428313	Coding
Art2b	5.53151	2.38908	0.699191	3.41692	0.000633343	NA	Coding
Rps17	6148.14	-0.174803	0.0512162	-3.41304	0.000642434	0.0434811	Ribosomal
A130071D04Rik	787.42	0.284202	0.0833912	3.40806	0.00065426	0.0438825	Noncoding
Lck	1981.87	0.157369	0.046242	3.40317	0.000666093	0.0441983	Coding
Gm14303	469.032	-0.235216	0.0691563	-3.40123	0.00067084	0.0441983	Predicted
Nrgn	2478.1	-0.534775	0.157505	-3.39529	0.000685559	0.0447718	Coding
Gm10260	7346.11	0.187722	0.0553527	3.39138	0.000695406	0.04502	Predicted
Rps25-ps1	99.8634	-0.438411	0.130076	-3.37043	0.000750516	0.0480154	Ribosomal
5830444F18Rik	328.284	0.470141	0.139651	3.36655	0.000761149	0.0480154	Noncoding
Gimap1os	163.61	0.423504	0.125877	3.36442	0.000767037	0.0480154	Noncoding
Gm26699	244.632	0.329138	0.0979006	3.36196	0.000773921	0.0480154	Predicted
Rpl30	8443.63	-0.192849	0.0573707	-3.36145	0.00077534	0.0480154	Ribosomal
Gm37376	92.9093	0.565657	0.168367	3.35966	0.000780372	0.0480154	Predicted
Tsc22d3	284.884	0.463228	0.138102	3.35424	0.000795845	0.048389	Coding
Siva1	499.685	-0.306437	0.0913921	-3.35299	0.000799442	0.048389	Coding
Sema4c	89.8607	-0.686082	0.204964	-3.34733	0.000815953	0.0489901	Coding
Cenpe	236.986	-0.393461	0.117706	-3.34275	0.000829525	0.0494065	Coding
Trbc1	2543.07	0.377192	0.113218	3.33157	0.000863576	0.0510264	Coding
Irf1	465.571	0.442033	0.133092	3.32126	0.000896131	0.052533	Coding
Mmp14	32.8203	-0.801304	0.241357	-3.32	0.000900171	NA	Coding
Cdca3	187.2	-0.373783	0.11266	-3.31779	0.000907311	0.0527729	Coding
Fcgrt	5.06764	2.01488	0.608054	3.31365	0.000920855	NA	Coding
Gm28935	90.8536	0.579556	0.174972	3.31228	0.000925391	0.0534073	Predicted
Rpl24	4988.56	-0.148949	0.045057	-3.3058	0.000947066	0.0542377	Ribosomal
Prkx	119.128	0.413362	0.125432	3.2955	0.000982456	0.055835	Coding
Ppdpf	411.136	0.2504	0.0761435	3.28853	0.00100714	0.056804	Coding
Cadm1	9.077	-1.55792	0.473781	-3.28827	0.00100805	NA	Coding
Dleu2	325.524	0.306437	0.0935437	3.27587	0.00105337	0.0589647	Noncoding
C230024C17Rik	50.3248	-0.68216	0.209163	-3.26138	0.00110871	0.0615994	Noncoding
Rnf125	297.429	0.380967	0.117311	3.24749	0.00116428	0.0638032	Coding
Lime1	2288.82	0.251601	0.077564	3.24378	0.00117953	0.0638032	Coding
1110032F04Rik	48.1019	-0.654719	0.2021	-3.23957	0.00119709	0.0638032	Coding
Neat1	751.477	0.200749	0.0619912	3.23835	0.00120223	0.0638032	Noncoding
Dtymk	484.655	-0.281668	0.0870146	-3.23702	0.00120786	0.0638032	Coding
Abcb1b	119.956	0.464122	0.143425	3.236	0.00121218	0.0638032	Coding
Malat1	76430.5	0.314522	0.0972049	3.23566	0.00121361	0.0638032	Noncoding
Churc1	574.812	0.19	0.0587347	3.23488	0.00121693	0.0638032	Coding
Tmem9b	277.131	0.328113	0.101656	3.22768	0.00124797	0.0649732	Coding
Diaph3	112.465	-0.429605	0.133311	-3.22257	0.00127045	0.065684	Coding
Phlda3	28.859	1.23796	0.385539	3.21099	0.00132279	NA	Coding
Rplp0-ps1	321.549	0.259011	0.0806697	3.21075	0.00132388	0.0679743	Ribosomal
Igflr1	20.6325	-1.04125	0.324584	-3.20794	0.00133688	NA	Coding
Igfbp4	11.8782	2.13275	0.667454	3.19535	0.00139662	NA	Coding
Ubb	13275.7	0.214999	0.0672995	3.19465	0.00139998	0.0713895	Coding
Igtp	698.752	0.500623	0.156812	3.19251	0.00141041	0.0714321	Coding
Shcbp1	109.463	-0.454213	0.142671	-3.18362	0.00145443	0.0730234	Coding
Slc29a1	223.966	-0.291712	0.0917077	-3.18089	0.00146826	0.0730234	Coding
Spc24	353.044	-0.335008	0.105372	-3.1793	0.00147633	0.0730234	Coding
Gpm6b	341.963	-0.623706	0.196235	-3.17837	0.00148106	0.0730234	Coding
Smarcc1	285.715	-0.298315	0.0939648	-3.17476	0.00149963	0.0732595	Coding
D8Ertd738e	1331.52	0.174136	0.0548699	3.17361	0.00150553	0.0732595	Coding
Trip13	78.2569	-0.511096	0.161363	-3.16736	0.00153828	0.074367	Coding
Gm7879	13.7602	-1.03723	0.328038	-3.16192	0.00156731	NA	Predicted
Tagap	260.627	0.485225	0.15346	3.1619	0.00156743	0.0747213	Coding
Tomm22	880.248	0.171472	0.0542488	3.16085	0.00157307	0.0747213	Coding
Hells	362.272	-0.340165	0.107635	-3.16036	0.00157572	0.0747213	Coding
Ftl1	4822	0.215257	0.0682963	3.15181	0.00162261	0.0764577	Coding
Tcp11l2	98.7635	0.461985	0.146711	3.14894	0.00163863	0.0767269	Coding
Phactr2	220.433	-0.378303	0.120248	-3.14602	0.00165506	0.077012	Coding
Gm8186	515.255	0.203282	0.0647402	3.13996	0.00168969	0.078135	Predicted
Il18r1	1064.6	-0.355878	0.113427	-3.13751	0.00170387	0.0783043	Coding
Ifi208	106.965	0.617807	0.197377	3.13009	0.00174756	0.0798193	Coding
Picalm	442.966	0.226257	0.0724181	3.12431	0.00178222	0.0804405	Coding
Gm1821	60.8314	0.491015	0.157164	3.12422	0.00178276	0.0804405	Predicted
Polr1d	1907.82	0.140737	0.0451313	3.11838	0.00181846	0.0815568	Coding
Timeless	80.007	-0.462655	0.148501	-3.11551	0.00183628	0.0817703	Coding
2810474O19Rik	563.204	0.303535	0.0974717	3.11408	0.00184519	0.0817703	Coding
Gdpd5	31.9607	-0.744693	0.239977	-3.10318	0.00191454	NA	Coding
Pnrc1	1527.54	0.298106	0.0961676	3.09986	0.0019361	0.0848511	Coding
Kif20a	53.247	-0.531487	0.171467	-3.09965	0.0019375	0.0848511	Coding
Scand1	1769.6	0.199165	0.0643311	3.09593	0.00196194	0.0854188	Coding
Mkrn1	625.534	0.24852	0.0803242	3.09396	0.00197504	0.0854895	Coding
Tacc3	210.798	-0.323948	0.104928	-3.08733	0.00201961	0.0869135	Coding
Ier2	1054.38	0.301452	0.097764	3.08347	0.00204605	0.0875449	Coding
Gbp9	200.179	0.365932	0.118759	3.0813	0.00206102	0.0876816	Coding
Il17ra	113.183	0.451731	0.14676	3.07802	0.00208384	0.0881489	Coding
Ms4a4b	8579.81	0.342699	0.111553	3.07207	0.00212579	0.0894151	Coding
Kif4	87.024	-0.506365	0.16517	-3.06571	0.0021715	0.0906074	Coding
Clic4	240.734	-0.311779	0.101777	-3.06336	0.00218867	0.0906074	Coding
Rps11-ps1	386.992	-0.263788	0.0861182	-3.06309	0.00219064	0.0906074	Ribosomal
Gm8730	9766.87	0.140266	0.0459132	3.05503	0.00225036	0.0918529	Predicted
Slc25a4	1696.21	-0.133098	0.0435841	-3.05382	0.00225945	0.0918529	Coding
Kctd12	69.2742	0.511222	0.167459	3.05282	0.00226703	0.0918529	Coding
Tpst2	345.101	0.41356	0.135486	3.05241	0.0022701	0.0918529	Coding
Gm10288	618.991	0.198497	0.0650715	3.05045	0.002285	0.0918611	Predicted
Cdca2	69.1281	-0.544457	0.178561	-3.04914	0.00229499	0.0918611	Coding
Klra9	12.8641	-2.80182	0.919849	-3.04596	0.00231943	NA	Coding
Slc9b2	56.695	-0.833945	0.273944	-3.04422	0.00233285	0.0922829	Coding
Ncapg	174.128	-0.376008	0.123558	-3.04318	0.00234094	0.0922829	Coding
Rpl6l	212.222	0.263408	0.0865632	3.04295	0.00234271	0.0922829	Ribosomal
Ubald2	793.458	0.386602	0.12744	3.03361	0.0024165	0.0946888	Coding
Sumo3	323.899	-0.260522	0.08609	-3.02616	0.00247679	0.096543	Coding
AC124744.2	616.757	-0.201045	0.0664864	-3.02386	0.00249576	0.0967738	Noncoding
Gpr183	847.736	0.361216	0.119517	3.02229	0.00250871	0.0967738	Coding
Gimap5	341.861	0.230969	0.0765024	3.0191	0.00253524	0.0972932	Coding
Tmub1	65.9966	0.46707	0.155134	3.01076	0.00260597	0.0994946	Coding
Gna15	260.119	0.465874	0.15503	3.00506	0.00265531	0.100033	Coding
Apbb1ip	382.327	0.301652	0.100416	3.00403	0.00266427	0.100033	Coding
Rps15a-ps7	183.957	0.275406	0.0916952	3.0035	0.00266895	0.100033	Ribosomal
Arl5c	67.5254	0.847288	0.282185	3.00259	0.0026769	0.100033	Coding
Ms4a6b	3905.53	0.311882	0.103912	3.00142	0.00268727	0.100033	Coding
Cox17	2207.92	-0.201174	0.0671616	-2.99537	0.00274116	0.101532	Coding
Rpl34-ps1	714.965	-0.201611	0.0673557	-2.99322	0.00276048	0.101741	Ribosomal
Bcl6b	5.65527	-1.70537	0.570116	-2.99127	0.00277821	NA	Coding
Ccnb2	344.55	-0.342892	0.114744	-2.98834	0.00280501	0.102873	Coding
Ccr8	35.7526	-0.621733	0.208409	-2.98323	0.0028522	NA	Coding
1500004A13Rik	27.4664	-0.819149	0.274664	-2.98236	0.00286031	NA	Noncoding
Rfc5	241.735	-0.357698	0.120045	-2.97969	0.00288542	0.105051	Coding
Tuba1c	372.579	-0.291058	0.0977472	-2.97766	0.00290457	0.105051	Coding
Gm28437	85.6939	0.417124	0.140095	2.97743	0.00290673	0.105051	Predicted
Hspa8	8241.32	0.209003	0.0703181	2.97225	0.00295626	0.106315	Coding
Pgrmc1	301.619	-0.229342	0.0771988	-2.9708	0.00297025	0.106315	Coding
Gm11336	14.4304	-0.992726	0.334665	-2.96633	0.00301379	NA	Predicted
Ppp1r15a	494.713	0.302227	0.102005	2.96285	0.00304801	0.108576	Coding
S100a10	6694.37	0.268252	0.090637	2.95963	0.0030801	0.109197	Coding
Zfp791	3.68906	-2.8358	0.958208	-2.95948	0.00308159	NA	Coding
Gm12254	681.604	0.17487	0.0591407	2.95684	0.00310812	0.109668	Predicted
Gm36988	8.81722	-2.19621	0.742795	-2.95668	0.0031097	NA	Predicted
Acss1	63.5865	-0.482716	0.163574	-2.95105	0.00316691	0.111103	Coding
Trbv17	3.373	3.53333	1.19775	2.94996	0.00317816	NA	Coding
Rpl29	352.747	-0.246807	0.0836657	-2.94991	0.00317862	0.111103	Ribosomal
Gm5239	36.294	0.57846	0.196645	2.94165	0.00326471	NA	Predicted
Rnf111	222.088	0.266314	0.0905688	2.94046	0.00327723	0.113732	Coding
Gpx4	984.474	0.199528	0.0678759	2.9396	0.00328631	0.113732	Coding
Eno1	3731.75	0.214924	0.0731444	2.93835	0.00329968	0.113732	Coding
Phb	441.813	-0.197024	0.0672172	-2.93116	0.00337699	0.11586	Coding
Gins2	150.067	-0.398289	0.135994	-2.92873	0.00340354	0.116235	Coding
Tpm4	915.199	-0.200661	0.0686089	-2.92471	0.00344773	0.117207	Coding
Rn7sk	37.5695	-0.723745	0.247793	-2.92077	0.00349172	NA	Noncoding
H2afj	1621.78	0.179051	0.061353	2.91838	0.00351853	0.118713	Coding
Dok2	1013.67	0.320389	0.109801	2.9179	0.00352393	0.118713	Coding
Hist1h2af	14.6835	-1.05499	0.36174	-2.91643	0.00354058	NA	Coding
Kdm6bos	23.0388	0.86361	0.296136	2.91626	0.00354259	NA	Noncoding
Tyms	396.418	-0.395657	0.135728	-2.91508	0.00355598	0.119253	Coding
Olfr889	3.77632	-3.09654	1.06271	-2.91382	0.0035704	NA	Coding
Ifi214	196.711	0.678036	0.232986	2.9102	0.00361201	0.120589	Coding
Gmfg-ps	56.424	0.485214	0.16694	2.90651	0.00365487	0.121476	Noncoding
Gm4742	40.9926	0.558714	0.192332	2.90495	0.00367312	NA	Predicted
Phxr4	94.3885	0.470741	0.16217	2.90276	0.00369887	0.122392	Noncoding
Selplg	1955.31	0.165114	0.0569525	2.89916	0.00374161	0.123258	Coding
Gstp1	174.489	0.327708	0.113267	2.89323	0.00381298	0.124805	Coding
B930036N10Rik	86.3895	-0.583931	0.201896	-2.89224	0.00382506	0.124805	Noncoding
Eif1-ps1	154.697	0.333614	0.115393	2.89111	0.00383887	0.124805	Noncoding
Gm37593	67.4495	0.552928	0.191471	2.88779	0.00387958	0.12558	Predicted
Fbxl12	136.57	0.341148	0.118341	2.88275	0.00394224	0.127056	Coding
Pds5a	265.631	-0.229553	0.0798764	-2.87385	0.00405503	0.130128	Coding
Glis1	1.44812	-3.81675	1.32966	-2.87047	0.00409861	NA	Coding
Tk1	314.117	-0.385054	0.134254	-2.8681	0.0041295	0.131449	Coding
Hist1h4d	143.787	-0.386374	0.134754	-2.86725	0.00414056	0.131449	Coding
Cggbp1	523.092	0.18444	0.0643745	2.86512	0.00416858	0.131449	Coding
Rnaseh2b	160.409	-0.321989	0.11241	-2.86442	0.00417771	0.131449	Coding
Il12rb1	89.2882	0.402769	0.14065	2.86363	0.00418811	0.131449	Coding
4833407H14Rik	9.99707	1.31891	0.460692	2.86289	0.00419799	NA	Noncoding
Tmpo	865.725	-0.245924	0.0859099	-2.86258	0.00420213	0.131449	Coding
Msi2	521.92	-0.318837	0.111443	-2.86099	0.00422319	0.131555	Coding
Nid1	16.3153	-1.10135	0.385005	-2.86063	0.00422807	NA	Coding
Celf4	5.45276	2.03995	0.713551	2.85887	0.00425147	NA	Coding
Gm21887	23.562	1.21254	0.42457	2.85592	0.00429118	NA	Predicted
Cks1b	585.907	-0.302071	0.10586	-2.85351	0.00432394	0.134132	Coding
Gm7582	3.33975	2.41559	0.846749	2.85278	0.00433385	NA	Predicted
Nme2	49.4914	-0.547482	0.19222	-2.8482	0.00439671	0.134978	Coding
Selenow	2419.57	0.232342	0.0816066	2.8471	0.00441192	0.134978	Coding
Actn4	667.432	-0.192447	0.0676262	-2.84574	0.00443081	0.134978	Coding
Rpl27	7013.45	-0.154638	0.0543479	-2.84534	0.00443644	0.134978	Ribosomal
Arhgap15	376.512	0.22087	0.0776357	2.84495	0.00444187	0.134978	Coding
Npc2	1386.1	0.300352	0.105886	2.83657	0.00456003	0.13754	Coding
Lilr4b	101.835	0.607126	0.214146	2.8351	0.00458118	0.13754	Coding
Hirip3	139.73	-0.358364	0.126404	-2.83507	0.0045816	0.13754	Coding
Sgo2a	98.1772	-0.419448	0.148197	-2.83034	0.0046499	0.13859	Coding
Map1lc3b	1270.65	0.197357	0.0697779	2.82835	0.00467883	0.13859	Coding
Cdc20	241.574	-0.358793	0.126866	-2.82812	0.00468216	0.13859	Coding
Dnajc15	838.465	0.323805	0.114519	2.82752	0.00469102	0.13859	Coding
Slc15a1	21.0617	-1.07431	0.380135	-2.82613	0.00471149	NA	Coding
Flnb	89.2545	-0.448446	0.158798	-2.82401	0.00474275	0.139564	Coding
Tspyl1	195.391	0.259833	0.0921451	2.81983	0.00480495	0.140033	Coding
Smc2	751.768	-0.287033	0.101804	-2.81947	0.00481029	0.140033	Coding
Il16	215.551	0.344007	0.122061	2.81832	0.00482759	0.140033	Coding
Myo1e	62.3202	-0.637598	0.226267	-2.8179	0.00483391	0.140033	Coding
F2rl2	41.0805	0.707358	0.251076	2.8173	0.00484291	NA	Coding
Gm5905	271.118	0.226758	0.0805204	2.81616	0.00486016	0.140248	Predicted
C230096K16Rik	39.3867	0.790127	0.2815	2.80684	0.005003	NA	Noncoding
Sqor	7.67988	1.3597	0.484487	2.80647	0.00500874	NA	Coding
P2ry10	364.523	0.253931	0.0906003	2.80277	0.00506665	0.145227	Coding
1810026B05Rik	962.834	0.189864	0.0677494	2.80244	0.00507174	0.145227	Noncoding
Txnl4b	9.31349	1.1252	0.401519	2.80237	0.00507292	NA	Coding
Ret	4.67493	1.75461	0.626381	2.80119	0.00509141	NA	Coding
Dlgap5	124.26	-0.446898	0.159656	-2.79913	0.00512401	0.146162	Coding
Mki67	787.85	-0.227418	0.0812888	-2.79765	0.00514755	0.146273	Coding
Sec61g	624.526	0.193505	0.0692206	2.79549	0.00518212	0.146695	Coding
St6galnac6	28.4153	-0.662638	0.237324	-2.79213	0.00523627	NA	Coding
Tubb5	4569.18	-0.228951	0.0820861	-2.78916	0.00528452	0.147481	Coding
Gzmb	12518.2	0.479395	0.171883	2.78907	0.00528591	0.147481	Coding
Cd37	928.657	0.200456	0.0718775	2.78885	0.00528957	0.147481	Coding
Pop5	636.893	-0.175278	0.0628524	-2.78872	0.00529173	0.147481	Coding
Nup205	68.4026	-0.43768	0.157006	-2.78767	0.00530892	0.147481	Coding
Cd2	1825.28	0.468128	0.168016	2.78622	0.00533268	0.14759	Coding
2810001G20Rik	30.2173	0.652049	0.234334	2.78257	0.00539304	NA	Noncoding
Macf1	651.588	-0.175709	0.0631541	-2.78222	0.00539888	0.148495	Coding
Tnfaip8l2	222.712	0.423	0.152105	2.78097	0.00541975	0.148495	Coding
Ifi27	1216.76	-0.15489	0.0557269	-2.77946	0.005445	0.148495	Coding
Htra2	103.713	-0.393055	0.141415	-2.77945	0.00544514	0.148495	Coding
Gm6274	269.546	0.256145	0.0923087	2.77488	0.00552223	0.150048	Predicted
Anapc15	246.497	-0.27597	0.0995818	-2.77128	0.00558356	0.151162	Coding
Sys1	511.32	0.254481	0.0918873	2.76949	0.00561435	0.151227	Coding
Kif22	96.7827	-0.354732	0.128118	-2.76878	0.00562658	0.151227	Coding
Trav3-3	8.77777	-1.50251	0.543319	-2.76542	0.00568489	NA	Coding
Ccm2	173.145	0.321471	0.116336	2.7633	0.005722	0.153238	Coding
Trav2	4.12686	3.06197	1.11017	2.7581	0.0058139	NA	Coding
Hint1	3383.59	-0.149064	0.0540634	-2.75721	0.00582969	0.154792	Coding
Mcph1	57.3306	-0.453721	0.164561	-2.75715	0.00583075	0.154792	Coding
Jarid2	404.994	0.226431	0.0821445	2.7565	0.00584238	0.154792	Coding
Mnd1	46.371	-0.842865	0.306443	-2.75048	0.00595083	NA	Coding
Ccr5	642.939	0.729773	0.265345	2.75028	0.0059545	0.157203	Coding
Zmat1	25.0967	-0.690518	0.25136	-2.74713	0.00601196	NA	Coding
Gm45153	54.6665	0.600802	0.219209	2.74078	0.00612944	0.16125	Predicted
Lef1	143.727	0.655397	0.239309	2.7387	0.00616818	0.161698	Coding
B230307C23Rik	53.4551	0.457816	0.16745	2.73405	0.00625613	0.163065	Coding
Ddit4	582.602	-0.301482	0.110359	-2.73183	0.00629843	0.163065	Coding
Rfc2	559.962	-0.231815	0.0848586	-2.73178	0.00629931	0.163065	Coding
Psat1	221.506	-0.306087	0.1121	-2.73049	0.00632399	0.163065	Coding
mt-Nd2	7715.58	0.114472	0.0419281	2.73019	0.00632984	0.163065	Mitochondrial
Icam1	199.394	0.38616	0.14155	2.72808	0.00637043	0.163544	Coding
Ocel1	207.1	0.253943	0.0931447	2.72632	0.00640445	0.163831	Coding
Phf11d	14.0632	1.09202	0.400747	2.72497	0.0064308	NA	Coding
Galt	54.3834	0.504458	0.185152	2.72455	0.00643886	0.163831	Coding
Prc1	247.326	-0.268308	0.098494	-2.7241	0.00644762	0.163831	Coding
Gm10012	48.4282	-0.477436	0.175555	-2.71958	0.00653649	0.165361	Predicted
Ddit3	228.146	0.395932	0.14566	2.7182	0.00656386	0.165361	Coding
Ptger4	93.677	0.417577	0.153653	2.71766	0.00657448	0.165361	Coding
Snrpd1	1236.17	-0.190182	0.0701134	-2.7125	0.00667784	0.167396	Coding
Col11a2	3.23094	-2.10521	0.777514	-2.70762	0.00677682	NA	Coding
Tsfm	215.72	-0.239267	0.0884482	-2.70516	0.00682712	0.170532	Coding
Ecm1	30.786	0.871388	0.322424	2.70261	0.00687972	NA	Coding
Ap3b1	512.666	-0.334396	0.123733	-2.70256	0.00688084	0.170532	Coding
Ndc80	98.9865	-0.434391	0.160757	-2.70215	0.00688924	0.170532	Coding
Tnrc6c	341.086	0.22861	0.0846109	2.70189	0.00689458	0.170532	Coding
Gm42684	20.4669	0.972294	0.359897	2.70159	0.00690087	NA	Predicted
Cpsf2	328.863	-0.213271	0.0790276	-2.69869	0.00696136	0.171614	Coding
Gm38062	325.024	0.336921	0.124908	2.69735	0.00698944	0.171737	Predicted
Gbp2	224.71	0.523642	0.194229	2.696	0.00701771	0.171865	Coding
Abhd8	171.737	0.383438	0.142344	2.69375	0.00706539	0.172413	Coding
Cyba	2922.64	0.333636	0.123901	2.69276	0.00708642	0.172413	Coding
Cbx5	335.989	-0.263644	0.098013	-2.68989	0.00714752	0.172812	Coding
Cst3	1575.37	-0.226137	0.0840718	-2.68981	0.00714923	0.172812	Coding
Cad	103.255	-0.338095	0.125804	-2.68747	0.00719958	0.173466	Coding
Il4	1.83589	3.81391	1.42059	2.68473	0.00725885	NA	Coding
Bace2	39.2466	-0.668715	0.249097	-2.68455	0.00726268	NA	Coding
Ubash3a	123.413	0.307677	0.114989	2.6757	0.00745734	0.178921	Coding
Slpi	1.67964	3.69682	1.38188	2.6752	0.00746848	NA	Coding
Eif4h	764.934	-0.169967	0.0635408	-2.67493	0.0074744	0.178921	Coding
Ccng1	357.869	0.346043	0.129417	2.67387	0.00749808	0.178921	Coding
Epb41l2	97.477	-0.51668	0.193487	-2.67036	0.007577	0.180226	Coding
Acsl5	483.324	-0.206401	0.0773486	-2.66845	0.0076202	0.180599	Coding
Mad2l1bp	144.246	0.299234	0.112177	2.66753	0.00764118	0.180599	Coding
Kifc1	36.7468	-0.546556	0.204928	-2.66706	0.0076517	NA	Coding
Wdr95	124.84	0.685108	0.257558	2.66002	0.00781362	0.183725	Coding
Lrr1	66.3992	-0.666261	0.250585	-2.65883	0.00784134	0.183725	Coding
Pcna	514.554	-0.286553	0.107785	-2.65856	0.00784751	0.183725	Coding
Sp100	1212.78	0.279519	0.105259	2.65554	0.00791818	0.1843	Coding
Mtif3	86.2007	0.339041	0.12768	2.6554	0.00792154	0.1843	Coding
Gm6934	14.8983	0.964514	0.363584	2.65279	0.00798283	NA	Predicted
Pcid2	99.5793	-0.338426	0.127687	-2.65044	0.00803862	0.186441	Coding
Rab19	219.86	0.328722	0.124075	2.64938	0.00806385	0.186445	Coding
Hpf1	679.008	-0.169704	0.0641428	-2.64572	0.00815169	0.186558	Coding
Ypel2	33.1321	-0.633355	0.239463	-2.6449	0.00817156	NA	Coding
Kif11	197.326	-0.255772	0.0967401	-2.64391	0.00819556	0.186558	Coding
Gm10224	60.4212	0.404322	0.152974	2.64308	0.00821545	0.186558	Predicted
Slc37a3	71.14	0.394892	0.149417	2.64288	0.00822042	0.186558	Coding
Gm37420	80.915	0.445904	0.168752	2.64237	0.00823277	0.186558	Predicted
Bmpr2	74.1587	-0.494798	0.187358	-2.64092	0.00826806	0.186558	Coding
Zfp830	142.928	0.34016	0.128838	2.64021	0.00828541	0.186558	Coding
Tprgl	604.824	0.20787	0.0787424	2.63987	0.00829381	0.186558	Coding
Arhgap45	949.967	0.244949	0.0927889	2.63985	0.00829424	0.186558	Coding
Irak1bp1	22.8838	-0.726024	0.275318	-2.63704	0.00836333	NA	Coding
Ncapg2	86.963	-0.37453	0.142075	-2.63614	0.00838563	0.188045	Coding
Pja1	134.557	0.393926	0.149738	2.63077	0.0085192	0.189817	Coding
AC117245.3	55.6446	-0.715089	0.271849	-2.63046	0.00852688	0.189817	Noncoding
Zc3h12a	130.253	0.4534	0.172402	2.62989	0.00854114	0.189817	Coding
Pign	41.601	-0.524097	0.199467	-2.62749	0.00860177	NA	Coding
Ppie	371.968	-0.242698	0.0924818	-2.62428	0.00868335	0.192403	Coding
Mars	120.96	-0.334825	0.127671	-2.62255	0.00872735	0.192805	Coding
Top2a	938.98	-0.28923	0.110509	-2.61725	0.00886418	0.195248	Coding
Slc6a6	237.562	-0.234544	0.0896731	-2.61554	0.00890854	0.19546	Coding
Rrad	79.9651	0.680608	0.260284	2.61486	0.0089263	0.19546	Coding
Nfat5	302.914	-0.306257	0.117172	-2.61373	0.00895587	0.195532	Coding
Gimap7	989.92	0.353748	0.135477	2.61112	0.00902462	0.196286	Coding
Gucy1b3	1.66634	-3.27273	1.25351	-2.61085	0.00903181	NA	Coding
A630081D01Rik	238.002	0.360955	0.138275	2.61042	0.00904315	0.196286	Noncoding
Senp3	92.9955	-0.346121	0.132892	-2.60453	0.0092001	0.198906	Coding
Rpl9-ps6	144.179	-0.321306	0.123398	-2.60383	0.00921886	0.198906	Ribosomal
Mndal	1031.49	0.325965	0.125232	2.6029	0.00924397	0.198906	Coding
Fgf2	2.61352	-2.74876	1.05774	-2.5987	0.00935769	NA	Coding
Gimap4	1826.07	0.245111	0.0943798	2.59707	0.00940238	0.201731	Coding
2610005L07Rik	108.336	0.335786	0.129516	2.59263	0.00952465	0.203693	Noncoding
Fyn	743.844	0.174262	0.0672526	2.59115	0.00956563	0.203693	Coding
Atad5	100.154	-0.329091	0.127024	-2.59078	0.00957591	0.203693	Coding
Slfn2	1338.7	0.45011	0.173842	2.58919	0.00962009	0.20405	Coding
Borcs8	419.126	0.25039	0.0967551	2.58787	0.00965718	0.204255	Coding
Creb3l2	95.7836	-0.447269	0.172905	-2.58679	0.00968757	0.204317	Coding
Arl6ip5	1083.55	0.167963	0.0649656	2.58542	0.00972607	0.20455	Coding
AC153524.4	8.09194	-1.28472	0.49724	-2.58371	0.00977446	NA	Noncoding
Lfng	377.115	0.35725	0.138286	2.58341	0.00978285	0.204633	Coding
Plxdc2	54.2989	-0.537805	0.208325	-2.58156	0.00983548	0.204633	Coding
Rpl4	8993.15	-0.106479	0.0412473	-2.58147	0.00983802	0.204633	Ribosomal
Ywhah	1226.01	-0.133191	0.0516111	-2.58067	0.009861	0.204633	Coding
Hacd3	155.413	-0.385001	0.1492	-2.58044	0.00986745	0.204633	Coding
Mpzl3	47.0914	-0.493687	0.191344	-2.58011	0.00987702	NA	Coding
Gm7363	20.0582	0.697528	0.270374	2.57987	0.00988389	NA	Predicted
Ralgps2	32.529	0.601148	0.233092	2.57902	0.00990821	NA	Coding
Sertad1	234.181	0.342095	0.132761	2.57677	0.00997295	0.206246	Coding
Cxcl13	1.59567	-3.88026	1.5072	-2.57448	0.010039	NA	Coding
Fam107b	1019.94	0.179502	0.0698558	2.56961	0.0101813	0.209971	Coding
Spdl1	55.4667	-0.430308	0.16759	-2.56762	0.0102399	0.210598	Coding
Rad54b	22.5638	-0.6597	0.257183	-2.5651	0.0103147	NA	Coding
Traf1	449.557	0.315707	0.123193	2.56269	0.0103865	0.213023	Coding
Tmem140	48.942	0.663428	0.259043	2.56107	0.0104349	0.213428	Coding
Paxx	172.212	0.27549	0.107898	2.55324	0.0106726	0.217119	Coding
Nudt5	439.455	-0.215184	0.08428	-2.55321	0.0106737	0.217119	Coding
Pkib	1.43011	3.43577	1.34577	2.55302	0.0106795	NA	Coding
Grn	75.3811	-0.364702	0.142938	-2.55147	0.0107271	0.217178	Coding
2020-09-01	1655.84	0.171908	0.0674043	2.5504	0.0107599	0.217178	Coding
Phf1	100.683	0.34536	0.135451	2.54971	0.0107813	0.217178	Coding
Gm15886	1.4677	-3.12888	1.22749	-2.54901	0.0108029	NA	Predicted
Ska2	86.1882	-0.384644	0.150948	-2.54819	0.0108284	0.217178	Coding
Gm43329	70.2989	0.383521	0.150593	2.54674	0.0108736	0.217178	Predicted
Nup37	108.365	-0.378554	0.148697	-2.54581	0.0109025	0.217178	Coding
H2afz	6070.2	-0.21934	0.0861693	-2.54546	0.0109135	0.217178	Coding
Pigk	163.12	-0.305279	0.119939	-2.54529	0.0109187	0.217178	Coding
Mgat2	369.625	0.198288	0.0779238	2.54464	0.0109391	0.217178	Coding
Itk	675.745	0.249065	0.0979147	2.54369	0.0109687	0.217186	Coding
Gm29257	32.0916	-0.549253	0.215951	-2.54341	0.0109776	NA	Predicted
Rfwd3	116.405	-0.343339	0.135045	-2.54241	0.0110091	0.217407	Coding
Arhgap5	44.5349	0.558292	0.219801	2.54	0.0110854	NA	Coding
Ptpn22	1002.43	0.228917	0.0901738	2.53862	0.011129	0.217628	Coding
9130401M01Rik	224.103	-0.246136	0.0969883	-2.5378	0.0111553	0.217628	Coding
Rfc4	242.7	-0.318252	0.125435	-2.53719	0.0111746	0.217628	Coding
Samhd1	611.935	0.445018	0.175417	2.53692	0.0111834	0.217628	Coding
Kctd9	95.3358	-0.357715	0.141014	-2.53674	0.011189	0.217628	Coding
Gm26518	49.3694	0.451395	0.177988	2.53609	0.0112098	0.217628	Predicted
Dut	1730.64	-0.25126	0.0990923	-2.53562	0.0112248	0.217628	Coding
Actl6a	299.88	-0.208819	0.0824837	-2.53165	0.0113529	0.219033	Coding
Rprd1b	121.046	-0.28806	0.113788	-2.53154	0.0113562	0.219033	Coding
Tox	390.078	-0.496851	0.196518	-2.52827	0.0114626	0.219526	Coding
Foxm1	48.0338	-0.557084	0.220351	-2.52817	0.011466	0.219526	Coding
Gins4	201.116	-0.247947	0.0980787	-2.52804	0.0114702	0.219526	Coding
Snrpf	1455.81	-0.153887	0.0610235	-2.52178	0.0116764	0.2229	Coding
Elmo3	3.25142	-1.99108	0.789767	-2.52109	0.0116991	NA	Coding
Zc3h12c	21.3943	-0.744537	0.295339	-2.52096	0.0117036	NA	Coding
Shq1	25.3929	-0.611742	0.242838	-2.51914	0.0117642	NA	Coding
Gtf2ird1	28.0686	-0.735871	0.292175	-2.5186	0.0117823	NA	Coding
Nup85	98.9557	-0.31588	0.125512	-2.51673	0.0118449	0.224469	Coding
Tmem120b	50.7924	-0.427804	0.170094	-2.5151	0.0118999	0.224469	Coding
Ikzf4	121.345	-0.308993	0.122861	-2.51497	0.0119042	0.224469	Coding
Svil	100.946	-0.321154	0.127703	-2.51485	0.0119083	0.224469	Coding
Klc1	142.099	-0.256025	0.101807	-2.51482	0.0119093	0.224469	Coding
D930028M14Rik	5.84544	1.61668	0.643146	2.51371	0.0119469	NA	Noncoding
Cd40lg	51.6677	0.706243	0.281425	2.50953	0.0120893	0.227284	Coding
3830403N18Rik	16.6911	-5.70883	2.27617	-2.50809	0.0121387	NA	Coding
Ifi47	830.743	0.28082	0.111974	2.50791	0.0121448	0.227355	Coding
Tax1bp1	1010.22	0.177117	0.0706309	2.50764	0.0121541	0.227355	Coding
Ctsa	379.404	0.277791	0.110855	2.5059	0.012214	0.227592	Coding
Commd10	129.514	-0.312423	0.124759	-2.50422	0.0122721	0.227592	Coding
Dusp16	99.8194	-0.484659	0.19358	-2.50366	0.0122917	0.227592	Coding
Fam189b	289.169	0.337643	0.134926	2.50242	0.0123347	0.227592	Coding
Glg1	265.242	-0.236762	0.0946137	-2.50241	0.0123353	0.227592	Coding
Dhx40	125.288	0.320468	0.128086	2.50198	0.0123502	0.227592	Coding
Gm15247	5.99942	1.32222	0.528491	2.50188	0.0123534	NA	Predicted
Ifngr2	4.61146	1.92864	0.77091	2.50177	0.0123574	NA	Coding
Ptpn18	3508.41	0.203148	0.0812795	2.49937	0.0124413	0.228266	Coding
4732440D04Rik	53.0293	0.454594	0.181897	2.49918	0.0124481	0.228266	Noncoding
Ndufb4	144.349	-0.267365	0.107039	-2.49783	0.0124957	0.228278	Coding
Dnajb6	1132.26	0.16833	0.0674092	2.49714	0.0125201	0.228278	Coding
Tcerg1	320.095	-0.19894	0.0796944	-2.49629	0.0125501	0.228278	Coding
Mpp6	331.446	-0.214694	0.086026	-2.49569	0.0125714	0.228278	Coding
Gm20430	14.5338	-0.771237	0.309227	-2.49408	0.0126284	NA	Predicted
BC002059	35.2099	0.49724	0.199463	2.4929	0.0126705	NA	Noncoding
Poc1b	38.0546	-0.539973	0.216648	-2.4924	0.0126882	NA	Coding
Ppard	30.1641	0.544372	0.218427	2.49224	0.0126942	NA	Coding
Gzma	2296.43	0.958982	0.384801	2.49215	0.0126972	0.229492	Coding
Slc35a4	132.076	-0.26058	0.104564	-2.49208	0.0126999	0.229492	Coding
Gm12094	3.12523	1.86855	0.749869	2.49184	0.0127083	NA	Predicted
B4galt4	6.62518	-1.23256	0.49522	-2.48892	0.0128133	NA	Coding
Gm35021	1.42485	-3.736	1.50141	-2.48834	0.0128342	NA	Predicted
Prkab2	22.1159	0.688346	0.276804	2.48677	0.012891	NA	Coding
Gimap3	1559.66	0.266729	0.107344	2.4848	0.0129624	0.233238	Coding
Syf2	767.204	0.138028	0.0555548	2.48454	0.0129718	0.233238	Coding
Wdr47	29.6717	-0.570776	0.229814	-2.48364	0.0130047	NA	Coding
B930095G15Rik	69.695	-0.488814	0.196884	-2.48275	0.0130372	0.233238	Noncoding
Cd200r4	70.7155	0.392266	0.158012	2.48251	0.013046	0.233238	Coding
Galnt1	504.97	-0.212811	0.085741	-2.48202	0.0130638	0.233238	Coding
Gm4951	5.33693	1.74892	0.7059	2.47758	0.0132278	NA	Predicted
Cenpf	359.286	-0.390512	0.157699	-2.47631	0.0132749	0.236438	Coding
Frmd6	22.1111	0.653926	0.264139	2.47568	0.0132982	NA	Coding
Nt5c	770.044	-0.153538	0.062045	-2.47463	0.0133375	0.236898	Coding
Ino80c	170.936	-0.287752	0.116315	-2.47391	0.0133643	0.236898	Coding
AC122367.3	30.7571	0.536077	0.216831	2.47233	0.0134235	NA	Noncoding
Tubb4b	974.934	-0.241841	0.0978475	-2.47161	0.0134507	0.237628	Coding
Ska1	95.2773	-0.425546	0.172235	-2.47073	0.0134837	0.237628	Coding
Rack1	15842.6	-0.100306	0.0406054	-2.47027	0.0135012	0.237628	Coding
Gm13341	21.5118	0.696296	0.281945	2.46961	0.0135259	NA	Predicted
H2-T22	1229.25	0.236361	0.0957489	2.46855	0.0135661	0.238174	Coding
Atad2	347.989	-0.198245	0.0803342	-2.46776	0.0135962	0.238174	Coding
Tbxa2r	47.0456	0.581007	0.235975	2.46215	0.0138107	NA	Coding
Wrb	10.1494	-0.955706	0.388173	-2.46206	0.0138141	NA	Coding
Gpsm3	1047.2	0.194189	0.0789181	2.46064	0.0138688	0.242084	Coding
Zmiz2	246.045	-0.23052	0.0936983	-2.46024	0.0138845	0.242084	Coding
Impact	120.683	0.351879	0.143248	2.45644	0.0140321	0.244086	Coding
Gm14859	1.62136	-2.75852	1.12372	-2.4548	0.0140961	NA	Predicted
mt-Cytb	17019	0.111228	0.0453229	2.45411	0.0141233	0.244765	Mitochondrial
Il11ra1	1.82676	2.65006	1.07989	2.454	0.0141278	NA	Coding
Twsg1	190.74	-0.378329	0.154213	-2.45329	0.0141557	0.244765	Coding
Nucks1	1222.77	-0.197144	0.0803919	-2.45228	0.0141954	0.244765	Coding
Emp3	1315.66	0.327395	0.133554	2.45141	0.0142297	0.244765	Coding
Dars	218.855	-0.226726	0.0924935	-2.45127	0.0142355	0.244765	Coding
Vcl	60.1081	-0.485248	0.198075	-2.44981	0.014293	0.245033	Coding
Acsl4	269.207	-0.27832	0.113637	-2.44921	0.0143169	0.245033	Coding
Styk1	189.181	0.455297	0.185971	2.44821	0.0143567	0.245151	Coding
Ftl1-ps1	37.7334	-0.479744	0.195962	-2.44815	0.0143593	NA	Coding
Ak4	3.71524	-1.85697	0.75932	-2.44557	0.0144623	NA	Coding
Cytip	1649.21	0.174199	0.0712402	2.44523	0.0144759	0.24662	Coding
Pigb	22.6424	-0.654114	0.267622	-2.44417	0.0145187	NA	Coding
Intu	11.7637	-0.897465	0.367327	-2.44323	0.0145563	NA	Coding
Atp2b2	55.0406	-0.811702	0.332353	-2.44229	0.0145945	0.247773	Coding
Rpl7	11541.7	0.0903503	0.037	2.4419	0.0146101	0.247773	Ribosomal
Lmnb1	603.944	-0.21976	0.0901269	-2.43834	0.0147549	0.249581	Coding
Fam49a	42.361	0.574173	0.235507	2.43803	0.0147675	NA	Coding
Minpp1	111.311	0.321725	0.132073	2.43596	0.0148523	0.249581	Coding
Hnrnph1	573.15	-0.14727	0.0604582	-2.4359	0.0148548	0.249581	Coding
Hist1h3c	79.5654	-0.577668	0.237174	-2.43563	0.0148659	0.249581	Coding
Vrk3	109.178	0.327258	0.134387	2.43518	0.0148843	0.249581	Coding
Cited2	571.088	0.267653	0.109948	2.43435	0.0149185	0.249592	Coding
Psma4	1673.93	-0.128783	0.0529225	-2.43343	0.0149564	0.249664	Coding
Vps37b	1539.79	0.293349	0.120687	2.43065	0.0150717	0.251026	Coding
Aunip	14.1332	-0.836129	0.344088	-2.42999	0.0150994	NA	Coding
Zfp809	40.0614	0.478656	0.197052	2.42909	0.0151367	NA	Coding
Fam174b	42.0739	-0.584234	0.240553	-2.42872	0.0151524	NA	Coding
Rpl27a	8379.53	0.106349	0.0438597	2.42476	0.0153183	0.254564	Ribosomal
4930579G24Rik	70.7112	-0.394326	0.162773	-2.42255	0.0154119	0.25505	Coding
Sgk1	237.855	0.403082	0.166398	2.42239	0.0154187	0.25505	Coding
Katna1	227.238	0.200965	0.0829868	2.42165	0.0154503	0.25505	Coding
Rangap1	359.074	-0.198553	0.0820449	-2.42006	0.0155181	0.255602	Coding
Ipo5	216.364	-0.266205	0.1102	-2.41566	0.0157067	0.258138	Coding
Hlcs	33.2661	-0.535402	0.221725	-2.41471	0.0157477	NA	Coding
Ski	175.914	-0.246041	0.101919	-2.41408	0.0157749	0.258687	Coding
Dkkl1	105.626	0.398516	0.16514	2.41319	0.0158134	0.258749	Coding
Gm26614	5.47536	1.69638	0.703476	2.41143	0.0158901	NA	Predicted
Klf2	940.509	0.72605	0.30111	2.41125	0.0158981	0.259564	Coding
Gck	1.12199	3.16615	1.3136	2.41028	0.0159403	NA	Coding
Nt5dc2	25.0474	-0.772579	0.320652	-2.4094	0.0159786	NA	Coding
Usp42	61.717	0.381263	0.158247	2.40929	0.0159836	0.259819	Coding
Psenen	1064.05	0.131685	0.0546609	2.40913	0.0159907	0.259819	Coding
Otulin	596.415	0.141096	0.0585825	2.4085	0.0160184	0.259819	Coding
Rnu11	42.1	-0.60892	0.252986	-2.40693	0.0160871	NA	Noncoding
Rgs8	91.5922	-0.993362	0.412715	-2.4069	0.0160887	0.260393	Coding
Vdac3	708.449	-0.131575	0.0546861	-2.406	0.0161281	0.260464	Coding
Fanci	18.8312	-0.705372	0.293259	-2.40529	0.0161598	NA	Coding
Lrrc59	291.139	-0.21397	0.0890412	-2.40305	0.0162591	0.261826	Coding
Rbbp7	700.993	-0.197116	0.0820458	-2.40251	0.0162828	0.261826	Coding
Cep85l	16.4394	-0.808786	0.33676	-2.40167	0.0163204	NA	Coding
Gm11696	3.81006	1.63215	0.679617	2.40157	0.0163247	NA	Predicted
Meaf6	186.917	-0.233007	0.0970825	-2.4001	0.0163908	0.262995	Coding
Gm38329	34.3772	-0.509177	0.212163	-2.39993	0.0163981	NA	Predicted
Coro1a	6909.01	0.121898	0.0508306	2.39813	0.0164789	0.263839	Coding
Dusp4	813.27	-0.276837	0.115772	-2.39122	0.0167926	0.268286	Coding
H3f3b	9460.55	0.252511	0.105738	2.38808	0.0169368	0.270009	Coding
Melk	65.297	-0.525295	0.2201	-2.38662	0.017004	0.270502	Coding
Galnt10	9.64486	0.927482	0.388635	2.38651	0.017009	NA	Coding
Serf1	41.4124	-0.450749	0.188884	-2.38638	0.017015	NA	Coding
Cd6	616.468	-0.20444	0.0857143	-2.38513	0.0170729	0.270699	Coding
Rad51ap1	117.983	-0.431413	0.180902	-2.38478	0.0170891	0.270699	Coding
Zfp472	50.5948	0.472919	0.198455	2.383	0.0171722	0.27101	Coding
Exo1	31.4319	-0.557473	0.234009	-2.38228	0.0172059	NA	Coding
AC153955.3	10.9036	-1.03133	0.432976	-2.38196	0.0172207	NA	Noncoding
Gbp2b	207.776	0.469672	0.19724	2.38122	0.0172556	0.27101	Coding
Depdc1a	67.0952	-0.441251	0.185365	-2.38044	0.0172921	0.27101	Coding
Hmgb3	310.588	-0.323664	0.13599	-2.38005	0.0173103	0.27101	Coding
Bcap29	354.668	-0.190351	0.0799831	-2.37988	0.0173181	0.27101	Coding
Hnrnpab	1492.13	-0.213132	0.0895629	-2.37969	0.0173272	0.27101	Coding
Rpl28-ps3	26.6934	0.611171	0.256906	2.37897	0.0173611	NA	Ribosomal
Nek2	37.0871	-0.524211	0.220357	-2.37891	0.0173637	NA	Coding
Alg6	55.3152	-0.420863	0.176938	-2.37859	0.017379	0.271251	Coding
Zdhhc7	67.1536	0.381229	0.160449	2.37602	0.0175007	0.272579	Coding
Dapp1	114.416	0.27655	0.116475	2.37434	0.0175806	0.273252	Coding
Trat1	1.94463	2.57114	1.08355	2.37288	0.0176498	NA	Coding
Gm42888	1.11584	-3.37242	1.42149	-2.37246	0.0176703	NA	Predicted
Gm43712	187.421	-0.242428	0.102234	-2.37132	0.0177248	0.274919	Predicted
Kremen2	3.21135	1.69127	0.713756	2.36953	0.0178105	NA	Coding
Gm12250	218.028	0.384739	0.162446	2.36841	0.0178648	0.275522	Predicted
Kdm7a	265.934	0.323271	0.136548	2.36745	0.0179112	0.275522	Coding
St3gal4	219.311	0.25572	0.108023	2.36727	0.0179196	0.275522	Coding
Gbp4	868.286	0.279725	0.118172	2.3671	0.017928	0.275522	Coding
Elmsan1	74.6166	0.373761	0.157971	2.36602	0.0179806	0.275522	Coding
1810058I24Rik	714.825	0.13763	0.0581775	2.36569	0.0179967	0.275522	Noncoding
Epsti1	941.092	0.309595	0.130899	2.36515	0.0180228	0.275522	Coding
Clspn	225.791	-0.31094	0.131536	-2.36391	0.0180832	0.275671	Coding
Slc25a5	3418.58	-0.153842	0.06511	-2.36279	0.0181377	0.275671	Coding
Bub1b	96.9917	-0.410567	0.173772	-2.36268	0.0181435	0.275671	Coding
Stxbp3	108.867	0.288543	0.122219	2.36087	0.0182322	0.276454	Coding
Tmem123	621.718	-0.183523	0.0778011	-2.35887	0.0183306	0.277046	Coding
Ran	3870.62	-0.166888	0.07077	-2.35817	0.0183653	0.277046	Coding
Tipin	510.088	-0.263007	0.111547	-2.35781	0.0183829	0.277046	Coding
Lncpint	90.1837	0.525862	0.223134	2.35671	0.0184379	0.277066	Noncoding
Ccr1	46.8975	0.642345	0.27259	2.35645	0.0184506	NA	Coding
Chek1	51.342	-0.440501	0.187015	-2.35542	0.0185016	0.277066	Coding
Relb	153.25	0.257019	0.109132	2.35511	0.0185173	0.277066	Coding
Ddx24	770.494	0.187247	0.0795173	2.35479	0.0185331	0.277066	Coding
Pik3r2	5.51225	-1.27114	0.540002	-2.35396	0.0185747	NA	Coding
Gm45084	22.9234	-0.569398	0.241966	-2.35321	0.0186119	NA	Predicted
Gbp7	786.373	0.224531	0.0954822	2.35155	0.0186956	0.278364	Coding
Gm9385	162.548	0.266082	0.113197	2.3506	0.0187431	0.278364	Predicted
Gmnn	444.897	-0.24766	0.105382	-2.35011	0.0187676	0.278364	Coding
Cd8b1	4999.3	0.172372	0.0733472	2.35008	0.0187695	0.278364	Coding
Scin	1.42939	-3.08046	1.31081	-2.35004	0.0187711	NA	Coding
Tubg1	164.708	-0.303583	0.129268	-2.34848	0.0188504	0.279009	Coding
2510016D11Rik	1.98526	2.29706	0.978399	2.34777	0.0188859	NA	Noncoding
Gm44829	16.0841	0.740537	0.315644	2.34612	0.0189702	NA	Predicted
Gabarapl2	1330.14	0.190467	0.0811841	2.34611	0.0189704	0.279809	Coding
Tmbim1	117.155	-0.397091	0.169268	-2.34593	0.0189797	0.279809	Coding
Dnmt1	310.614	-0.263035	0.112191	-2.34453	0.0190512	0.280309	Coding
Rpl31-ps6	3.26863	1.61157	0.687415	2.34438	0.0190585	NA	Ribosomal
Gm5617	70.6603	0.42151	0.179891	2.34314	0.0191222	0.280798	Predicted
Commd8	356.862	0.220503	0.0941618	2.34175	0.0191937	0.280898	Coding
Bcat1	68.2023	-0.405223	0.173058	-2.34154	0.0192045	0.280898	Coding
Abhd14b	15.9792	0.726041	0.310236	2.34029	0.019269	NA	Coding
Endod1	237.219	-0.316048	0.135075	-2.33979	0.0192945	0.281106	Coding
Mrps16	1094.14	0.139574	0.059682	2.33864	0.0193543	0.281106	Coding
Rfc1	269.948	-0.23771	0.101646	-2.33859	0.0193565	0.281106	Coding
Slc12a2	15.5396	-0.833081	0.356265	-2.33837	0.0193679	NA	Coding
Nono	909.532	-0.131113	0.0560779	-2.33805	0.0193845	0.281106	Coding
Gm45715	26.419	0.705014	0.301571	2.3378	0.0193975	NA	Predicted
Cd69	591.066	0.394638	0.168821	2.33761	0.0194075	0.281106	Coding
Gm13623	22.383	0.631416	0.270316	2.33584	0.0194996	NA	Predicted
Gm42572	8.49564	0.992415	0.424883	2.33574	0.019505	NA	Predicted
Maf	100.973	0.436025	0.186856	2.33347	0.0196233	0.283014	Coding
Reep4	159.2	-0.279917	0.119971	-2.33321	0.019637	0.283014	Coding
Sertad3	76.0715	0.387367	0.166045	2.3329	0.0196532	0.283014	Coding
AC158239.2	42.7345	0.460101	0.197263	2.33243	0.0196782	NA	Noncoding
Dip2c	10.2616	-0.956468	0.410129	-2.33211	0.0196948	NA	Coding
AI467606	97.7372	0.319427	0.137009	2.33143	0.0197306	0.283579	Coding
C920009B18Rik	87.9278	0.424583	0.182213	2.33015	0.0197981	0.283735	Noncoding
Pclaf	1473.69	-0.257051	0.110333	-2.32978	0.0198177	0.283735	Coding
Phldb3	14.9605	0.732265	0.314464	2.32861	0.0198798	NA	Coding
Tfdp1	313.292	-0.251495	0.108068	-2.3272	0.0199546	0.284443	Coding
2300009A05Rik	130.387	0.265282	0.114015	2.32674	0.0199792	0.284443	Coding
Nfe2l2	74.165	0.36879	0.158504	2.32669	0.0199817	0.284443	Coding
Atl3	168.048	-0.243058	0.104522	-2.32542	0.0200495	0.284864	Coding
Gm36933	75.2423	0.404428	0.174008	2.32419	0.0201152	0.28487	Predicted
Pcsk7	135.581	0.279659	0.120336	2.32398	0.0201265	0.28487	Coding
H2-K1	19273	0.162636	0.0700582	2.32144	0.0202633	0.285659	Coding
Gm20069	54.1129	0.428157	0.184442	2.32137	0.0202671	0.285659	Predicted
Gsk3b	466.751	0.165206	0.0711848	2.32081	0.0202973	0.285659	Coding
Tspan2os	2.86078	1.95421	0.842295	2.3201	0.0203356	NA	Noncoding
Clmp	4.33004	-1.54741	0.667321	-2.31883	0.0204042	NA	Coding
Tnfsf9	129.519	0.458227	0.197617	2.31876	0.0204081	0.286216	Coding
Ly6c1	1044.98	0.906238	0.390846	2.31865	0.0204138	0.286216	Coding
Gm38034	64.453	0.40841	0.176281	2.31681	0.020514	0.287081	Predicted
Pde4a	30.1986	-0.604321	0.26086	-2.31665	0.0205228	NA	Coding
Stat3	1567.27	-0.273028	0.117901	-2.31573	0.020573	0.287366	Coding
Gm12416	4.21895	1.53039	0.661301	2.31422	0.0206558	NA	Predicted
Gm20417	94.7972	0.34937	0.151093	2.31228	0.0207623	0.289129	Predicted
Rpl41	37571.8	-0.0779307	0.0337089	-2.31188	0.0207846	0.289129	Ribosomal
Fasl	500.945	0.270314	0.116953	2.31131	0.0208157	0.289129	Coding
Gm12967	0.996966	3.06871	1.32791	2.31093	0.0208368	NA	Predicted
Ccdc130	33.4988	0.499859	0.216351	2.3104	0.0208658	NA	Coding
Atp10d	67.4082	0.541945	0.234625	2.30983	0.0208974	0.289723	Coding
Sh2d5	20.335	0.866338	0.375533	2.30695	0.0210574	NA	Coding
Gm44321	10.4225	0.837234	0.362982	2.30654	0.0210804	NA	Predicted
Cit	68.2264	-0.441508	0.191428	-2.30639	0.0210889	0.291834	Coding
Cib2	20.7789	-0.746467	0.323703	-2.30603	0.0211091	NA	Coding
Msh6	41.9047	-0.517132	0.224311	-2.30542	0.021143	NA	Coding
Cdca7l	155.517	-0.310566	0.134769	-2.30443	0.0211984	0.292574	Coding
Eef1g	3238.51	-0.108268	0.0469925	-2.30393	0.0212264	0.292574	Coding
mt-Nd1	9744.8	0.125647	0.054551	2.30329	0.0212623	0.292574	Mitochondrial
Zwilch	40.5336	-0.568519	0.246979	-2.3019	0.021341	NA	Coding
Nup107	78.4491	-0.338286	0.146988	-2.30145	0.0213662	0.292574	Coding
AC124742.1	24.625	0.681007	0.295919	2.30133	0.0213733	NA	Noncoding
H2-D1	30701.4	0.176	0.0764856	2.30109	0.0213868	0.292574	Coding
Irf7	167.436	0.404979	0.176021	2.30074	0.0214061	0.292574	Coding
C230085N15Rik	239.993	0.424971	0.184828	2.29927	0.0214896	0.292574	Noncoding
Fabp5	626.763	-0.417095	0.18141	-2.29918	0.0214944	0.292574	Coding
Bdh2	168.401	-0.968481	0.421233	-2.29916	0.0214961	0.292574	Coding
Gm2245	12.3873	0.834584	0.363262	2.29747	0.0215918	NA	Predicted
Pea15a	141.236	0.301026	0.131048	2.29708	0.0216145	0.293443	Coding
Oas1a	39.219	0.531375	0.231341	2.29694	0.0216222	NA	Coding
Gm4335	2.58352	1.84566	0.8037	2.29645	0.0216501	NA	Predicted
Cdc42se1	415.349	0.209169	0.091112	2.29573	0.0216911	0.293443	Coding
Mrpl23	105.932	0.30203	0.131617	2.29476	0.0217466	0.293443	Coding
Lyrm2	135.971	0.2569	0.111958	2.29462	0.0217551	0.293443	Coding
Ece1	315.239	-0.297228	0.129534	-2.29458	0.021757	0.293443	Coding
Gm45343	40.9909	0.452629	0.197302	2.29409	0.0217851	NA	Predicted
Lpcat4	108.228	-0.305574	0.133301	-2.29237	0.0218842	0.294585	Coding
Rflnb	13.0096	1.09974	0.479865	2.29176	0.0219196	NA	Coding
Nop14	185.67	0.241881	0.105545	2.29174	0.0219207	0.294585	Coding
Gm12184	13.6121	-0.828362	0.361596	-2.29085	0.0219723	NA	Predicted
Espl1	25.4832	-0.56336	0.245926	-2.29077	0.0219769	NA	Coding
Thra	6.16553	1.18057	0.515703	2.28925	0.0220651	NA	Coding
Lrrc8a	28.7785	0.547987	0.239514	2.28791	0.0221425	NA	Coding
Gm17066	42.4527	-0.41151	0.179928	-2.28708	0.022191	NA	Predicted
E130308A19Rik	47.2271	-0.418511	0.183144	-2.28515	0.0223039	NA	Coding
Kdm6b	246.021	0.473545	0.207328	2.28404	0.022369	0.300068	Coding
Klhdc10	61.4573	-0.348658	0.152733	-2.28279	0.0224426	0.300513	Coding
Cmas	274.978	0.189237	0.0829593	2.28108	0.0225437	0.301325	Coding
Cep55	142.759	-0.248806	0.109133	-2.27985	0.0226166	0.301758	Coding
Ppp3r1	283.544	-0.203434	0.0892845	-2.2785	0.0226971	0.302289	Coding
4930520O04Rik	34.4125	-0.522438	0.229343	-2.27798	0.0227279	NA	Noncoding
Gpcpd1	128.81	0.33513	0.147195	2.27678	0.0227991	0.303106	Coding
Nck1	208.369	0.231394	0.101876	2.27133	0.0231272	0.306919	Coding
Gm37039	44.1863	0.523712	0.230704	2.27006	0.0232038	NA	Predicted
Rnf138	495.263	0.26774	0.117958	2.26979	0.0232205	0.307609	Coding
Fars2	165.055	-0.270109	0.119058	-2.26873	0.023285	0.307917	Coding
Kif14	30.1603	-0.570026	0.251307	-2.26825	0.0233142	NA	Coding
Gstt3	21.0862	-0.669578	0.295326	-2.26725	0.0233749	NA	Coding
Il13	11.4957	-2.6078	1.15042	-2.26682	0.0234015	NA	Coding
Nup133	47.1798	-0.418117	0.184508	-2.26612	0.0234441	NA	Coding
Adam8	156.649	0.556269	0.245681	2.26419	0.0235626	0.310171	Coding
Gramd3	558.76	0.659972	0.291518	2.26391	0.0235795	0.310171	Coding
Lad1	9.82764	-1.22705	0.542128	-2.2634	0.023611	NA	Coding
Man2a1	250.776	-0.185801	0.0821016	-2.26306	0.0236318	0.310171	Coding
Gnb4	52.3186	-0.41435	0.183143	-2.26244	0.02367	0.310171	Coding
Srsf3	2414.63	-0.108271	0.0478647	-2.26202	0.0236963	0.310171	Coding
Mcm10	40.446	-0.517308	0.228734	-2.26162	0.0237209	NA	Coding
Eif3f	3980.28	0.11684	0.0516884	2.26046	0.0237927	0.310171	Coding
Cnppd1	193.543	0.234476	0.103736	2.26031	0.0238023	0.310171	Coding
Shisa5	4040.05	0.189893	0.0840197	2.2601	0.023815	0.310171	Coding
Pfn1	15772.9	0.117598	0.0520512	2.25928	0.0238661	0.310171	Coding
Supt4a	1317.58	0.181578	0.0803736	2.25918	0.0238721	0.310171	Coding
Lgi2	2.52933	-2.22484	0.985414	-2.25777	0.0239601	NA	Coding
Golm1	91.8353	-0.326209	0.14451	-2.25735	0.023986	0.311107	Coding
Psme2	2165.25	0.126411	0.0560499	2.25532	0.0241132	0.311687	Coding
Pmf1	191.758	-0.242754	0.107637	-2.2553	0.0241144	0.311687	Coding
Cnp	405.829	0.165507	0.0734192	2.25428	0.0241784	0.311973	Coding
Ddc	2.19721	-2.35175	1.04349	-2.25373	0.024213	NA	Coding
Rpl13a-ps1	47.1152	0.429085	0.190407	2.25351	0.0242269	NA	Ribosomal
Timm21	80.8251	-0.30597	0.135823	-2.25272	0.0242771	0.312704	Coding
Zfp84	54.1984	0.356715	0.15843	2.25157	0.0243497	0.313097	Coding
Slfn9	63.7382	-0.339261	0.150747	-2.25054	0.0244149	0.313394	Coding
Fancm	47.2032	-0.417354	0.185453	-2.25045	0.0244202	NA	Coding
Miga1	41.4493	-0.426443	0.189559	-2.24966	0.0244706	NA	Coding
E430014B02Rik	98.6822	0.385019	0.171223	2.24864	0.0245357	0.314403	Noncoding
Mbd2	1366.82	0.11115	0.0495067	2.24516	0.0247582	0.316377	Coding
Kin	178.696	0.217095	0.0967064	2.24488	0.0247757	0.316377	Coding
Polq	12.7062	-0.780538	0.347834	-2.24399	0.0248328	NA	Coding
Sae1	461.868	-0.182604	0.0813802	-2.24383	0.0248432	0.316377	Coding
Kctd18	48.619	-0.388341	0.173139	-2.24295	0.0249003	0.316377	Coding
Slc25a33	59.4416	0.398711	0.177765	2.24292	0.0249022	0.316377	Coding
AC129016.2	94.1716	-0.308927	0.137785	-2.24209	0.0249554	0.316513	Noncoding
Nbeal2	108.317	0.309923	0.138352	2.24011	0.0250839	0.317601	Coding
Tktl1	4.70986	1.29491	0.578734	2.23748	0.025255	NA	Coding
Mpi	19.6946	-0.640024	0.286064	-2.23734	0.0252639	NA	Coding
Gm6169	26.7518	-0.556275	0.248644	-2.23724	0.0252709	NA	Predicted
Rpl27a-ps1	27.8127	0.503937	0.225357	2.23617	0.0253406	NA	Ribosomal
Saraf	751.377	0.212719	0.0951271	2.23616	0.0253416	0.32032	Coding
Hist1h2be	54.0981	-0.409228	0.183135	-2.23457	0.0254459	0.321093	Coding
Lcp1	2959.12	-0.124678	0.05584	-2.23277	0.0255639	0.321342	Coding
Abcb1a	98.2131	0.500785	0.224327	2.23239	0.0255892	0.321342	Coding
Hnrnpa1	2228.22	-0.127118	0.0569805	-2.23091	0.0256869	0.321342	Coding
Arhgef9	76.8298	-0.494636	0.2218	-2.23009	0.0257413	0.321342	Coding
Itm2b	3824.26	0.210567	0.0944209	2.23009	0.0257414	0.321342	Coding
Lrrfip1	1095.44	-0.135728	0.0608697	-2.22982	0.0257596	0.321342	Coding
Rad51	162.349	-0.352553	0.158117	-2.22969	0.0257678	0.321342	Coding
Ints7	83.4185	-0.366107	0.164277	-2.22859	0.0258409	0.321611	Coding
Wdr33	143.962	0.242394	0.108836	2.22715	0.0259373	0.321611	Coding
Aebp1	6.35865	-1.10144	0.494603	-2.22692	0.0259525	NA	Coding
Srsf7	928.685	-0.184911	0.0830366	-2.22686	0.0259566	0.321611	Coding
Ifi204	89.2289	0.336579	0.151164	2.22658	0.0259754	0.321611	Coding
Ikzf2	257.7	-0.480943	0.216048	-2.22609	0.026008	0.321611	Coding
AC125149.2	3.14396	1.60105	0.719415	2.22549	0.0260487	NA	Coding
Sla	737.868	0.211608	0.0951068	2.22495	0.0260846	0.321611	Coding
Hook3	182.691	-0.23234	0.10443	-2.22484	0.0260917	0.321611	Coding
Gm2663	7.2866	-4.01829	1.80622	-2.22469	0.0261019	NA	Predicted
Tpt1-ps5	15.7663	0.667369	0.300425	2.22142	0.0263227	NA	Noncoding
Il12rb2	345.604	0.297571	0.133987	2.2209	0.0263579	0.324355	Coding
Ckap4	4.67119	-1.30835	0.589195	-2.22057	0.0263804	NA	Coding
Acaa1b	22.0043	0.590336	0.265984	2.21944	0.0264567	NA	Coding
Fez2	39.7502	0.456697	0.205895	2.2181	0.0265478	NA	Coding
Il4ra	91.0279	0.443743	0.200185	2.21666	0.0266465	0.327365	Coding
CT030185.1	1.5863	-2.57508	1.16171	-2.21663	0.0266481	NA	Noncoding
Irgm2	56.8404	0.452895	0.204423	2.21548	0.0267271	0.327814	Coding
Nmnat2	6.63352	-1.2654	0.571248	-2.21514	0.0267502	NA	Coding
Zfp672	66.7439	0.333659	0.150771	2.21302	0.0268962	0.328211	Coding
Tcp1	1033.62	-0.152158	0.0687681	-2.21263	0.0269235	0.328211	Coding
Calm1	6371.87	-0.0845187	0.0381995	-2.21256	0.0269281	0.328211	Coding
Csrnp1	239.469	0.2512	0.113539	2.21245	0.0269358	0.328211	Coding
2810408I11Rik	39.8467	-0.459834	0.208192	-2.2087	0.0271953	NA	Noncoding
Hivep2	211.23	0.295124	0.13362	2.20869	0.0271961	0.330462	Coding
Sft2d1	42.5687	0.41975	0.190048	2.20865	0.0271988	NA	Coding
Ptpn7	426.89	-0.232868	0.105442	-2.2085	0.0272093	0.330462	Coding
Adgre5	496.963	0.232165	0.105179	2.20732	0.0272918	0.330924	Coding
Gm10571	7.05525	0.952958	0.431808	2.2069	0.0273208	NA	Predicted
Cenpa	1277.97	-0.252618	0.114515	-2.20598	0.0273853	0.331518	Coding
Flot1	127.694	0.268972	0.121984	2.20498	0.0274557	0.331831	Coding
Sap18	784.766	0.127449	0.0578535	2.20295	0.027598	0.333009	Coding
Crim1	61.4231	0.52039	0.236415	2.20117	0.027724	0.333494	Coding
C330027C09Rik	74.0107	-0.313086	0.142239	-2.20112	0.0277277	0.333494	Coding
Frmd4b	36.3309	0.485949	0.220876	2.2001	0.0277997	NA	Coding
Cenpw	440.894	-0.26627	0.121047	-2.19971	0.0278273	0.334152	Coding
Gm12468	3.09151	-1.70214	0.774485	-2.19776	0.027966	NA	Predicted
Atp6v0e2	25.6853	0.564889	0.257144	2.19678	0.028036	NA	Coding
Dck	124.47	-0.29794	0.135629	-2.19673	0.02804	0.336165	Coding
Lsm5	1259.35	-0.106491	0.048517	-2.19493	0.0281686	0.33696	Coding
Idi1	136.879	-0.350329	0.159637	-2.19454	0.0281969	0.33696	Coding
Nuf2	84.3288	-0.370028	0.168698	-2.19343	0.0282765	0.337369	Coding
Dynll2	401.021	-0.155109	0.0707538	-2.19224	0.0283624	0.337691	Coding
Hivep1	131.497	-0.291869	0.133164	-2.1918	0.0283942	0.337691	Coding
Sqstm1	402.122	0.238917	0.109069	2.19052	0.0284868	0.338252	Coding
AC168881.1	2.3607	-2.1103	0.963471	-2.19031	0.0285016	NA	Noncoding
Zbtb10	1.56399	2.43832	1.11383	2.18913	0.0285874	NA	Coding
Jakmip1.1	58.1652	0.455672	0.208221	2.18841	0.02864	0.338293	Coding
Ell2	70.9455	0.351672	0.160758	2.18758	0.0287002	0.338293	Coding
Ppp2r5a	506.937	0.165918	0.0758689	2.1869	0.02875	0.338293	Coding
Nucb2	11.0211	1.04987	0.480154	2.18654	0.0287763	NA	Coding
Tapbpl	409.79	0.196322	0.0897931	2.18638	0.0287879	0.338293	Coding
Pigc	82.5861	0.300123	0.137327	2.18546	0.0288548	0.338293	Coding
Zc3hav1	668.829	0.226668	0.103718	2.18542	0.0288578	0.338293	Coding
Sgsm2	11.1714	0.752425	0.344309	2.18532	0.0288653	NA	Coding
Pde4b	256.564	0.424675	0.194361	2.18499	0.0288898	0.338293	Coding
Vsir	352.208	0.279173	0.127776	2.18487	0.0288987	0.338293	Coding
D16Ertd472e	849.613	0.180107	0.0824343	2.18486	0.0288992	0.338293	Coding
Mir22hg	89.73	0.29131	0.133392	2.18387	0.028972	0.338613	Noncoding
Polg2	61.8021	0.339255	0.155403	2.18306	0.0290313	0.338641	Coding
Gm43312	54.5653	0.372007	0.170442	2.1826	0.0290654	0.338641	Predicted
Glmp	436.808	0.187657	0.0860313	2.18127	0.0291637	0.339119	Coding
Gm9794	1325.39	0.136637	0.0626544	2.18081	0.0291975	0.339119	Predicted
Cd274	291.583	0.330231	0.151482	2.18	0.0292572	0.339284	Coding
Gm43951	1.88391	2.24858	1.03192	2.17903	0.0293293	NA	Predicted
Tmem170b	56.8737	-0.445152	0.204325	-2.17865	0.0293577	0.339919	Coding
Ubr5	249.261	-0.27441	0.126003	-2.1778	0.0294207	0.340119	Coding
Gm15440	8.33052	0.913051	0.419416	2.17696	0.0294836	NA	Predicted
Pink1	80.4784	0.303598	0.13948	2.17664	0.0295075	0.340595	Coding
Baalc	3.25716	-1.69861	0.78173	-2.17289	0.0297886	NA	Coding
Prr7	90.8246	0.393107	0.180935	2.17265	0.0298068	0.343171	Coding
Far1	265.132	-0.183108	0.084287	-2.17243	0.0298229	0.343171	Coding
Gm13075	7.37712	-1.37345	0.63228	-2.17221	0.0298397	NA	Predicted
Fdx1	282.608	-0.181788	0.0837209	-2.17135	0.0299046	0.343309	Coding
Pdcd4	706.375	0.245614	0.113131	2.17105	0.0299271	0.343309	Coding
B4galt5	196.04	-0.214619	0.0989282	-2.16945	0.0300488	0.343947	Coding
Hibch	67.4296	-0.34432	0.158739	-2.1691	0.0300752	0.343947	Coding
Lrp5	8.39324	0.960474	0.443909	2.16367	0.0304894	NA	Coding
Zfp689	11.8071	0.75521	0.34907	2.16349	0.0305034	NA	Coding
Nlrc3	199.694	-0.261919	0.121087	-2.16306	0.0305362	0.347499	Coding
Xrn2	920.58	0.162897	0.0753114	2.16298	0.0305427	0.347499	Coding
Nudt4	356.261	-0.189301	0.087538	-2.1625	0.0305798	0.347499	Coding
5330406M23Rik	54.606	0.376587	0.174174	2.16212	0.0306086	0.347499	Noncoding
Fbxo33	118.673	0.249197	0.115263	2.16199	0.0306191	0.347499	Coding
Gm4459	37.4472	0.455733	0.210799	2.16193	0.0306233	NA	Predicted
BTF3L4	9.80325	-0.876936	0.405867	-2.16065	0.0307224	NA	Coding
Tead1	2.59743	-1.98188	0.917566	-2.15993	0.0307781	NA	Coding
Cd47	2976.94	0.139837	0.0647816	2.1586	0.0308814	0.349444	Coding
Fam102a	318.215	0.216815	0.100444	2.15856	0.0308844	0.349444	Coding
Pif1	11.7843	-0.887818	0.411359	-2.15826	0.030908	NA	Coding
Rap1b	1964.92	0.162188	0.0751611	2.15787	0.0309382	0.349522	Coding
Trdv1	1.76858	3.11375	1.44391	2.15647	0.0310469	NA	Coding
Itgam.1	4.68875	1.50782	0.699536	2.15545	0.0311264	NA	Coding
Gbp11	10.1462	1.37393	0.637422	2.15544	0.0311272	NA	Coding
Cdk2ap1	507.851	-0.22828	0.106102	-2.15153	0.0314348	0.354594	Coding
Clec3b	5.33497	1.11488	0.518353	2.15082	0.0314907	NA	Coding
Gm10073	369.39	-0.17022	0.0791897	-2.14952	0.031593	0.355576	Predicted
Xpa	256.286	0.183979	0.0856178	2.14884	0.0316469	0.355576	Coding
Trav12-2	3.28302	-2.09949	0.977243	-2.14838	0.0316832	NA	Coding
Stk17b	2102.08	0.173279	0.0806561	2.14837	0.0316844	0.355576	Coding
Mff	440.005	0.147651	0.0687424	2.14789	0.0317227	0.355576	Coding
Pacsin1	82.8426	-0.470643	0.219168	-2.14741	0.0317606	0.355576	Coding
Cfl2	103.862	0.253482	0.118074	2.1468	0.0318088	0.355581	Coding
AL589661.1	6.74293	-1.03228	0.481382	-2.14441	0.032	NA	Noncoding
Mylip	44.3445	0.412034	0.192343	2.14218	0.0321792	NA	Coding
Rac2	5796.44	0.141191	0.065954	2.14075	0.0322944	0.359737	Coding
Hdac7	213.777	-0.218543	0.102191	-2.13857	0.0324707	0.359737	Coding
Atp5sl	100.853	0.271226	0.12686	2.138	0.0325168	0.359737	Coding
Lpgat1	199.15	-0.204998	0.0959083	-2.13743	0.0325628	0.359737	Coding
Pik3r5	50.9298	0.445572	0.208475	2.13729	0.0325742	0.359737	Coding
Elf1	798.138	0.15399	0.0720564	2.13708	0.0325918	0.359737	Coding
Lyar	571.434	-0.190704	0.0892422	-2.13692	0.0326044	0.359737	Coding
Abhd17b	255.024	0.218429	0.102217	2.13691	0.0326052	0.359737	Coding
Spice1	42.7668	-0.417767	0.195501	-2.1369	0.0326059	NA	Coding
Fhl2	321.133	-0.225235	0.105427	-2.1364	0.0326472	0.359737	Coding
Calu	199.376	-0.239719	0.112219	-2.13617	0.0326652	0.359737	Coding
Cnn2	1629.75	0.147956	0.0692807	2.1356	0.0327121	0.359737	Coding
Gm10169	84.4046	0.289473	0.135658	2.13384	0.0328556	0.360782	Predicted
Gm28693	3.72519	1.44144	0.675829	2.13285	0.0329373	NA	Predicted
Gm8995	1889.31	0.208374	0.0977307	2.13213	0.0329963	0.361793	Predicted
Mib1	89.8617	-0.295084	0.138439	-2.13151	0.033047	0.361816	Coding
Cchcr1	31.516	-0.505219	0.237189	-2.13003	0.0331691	NA	Coding
Sgtb	1.46573	2.39363	1.12391	2.12973	0.0331938	NA	Coding
Kcnj8	15.3201	0.717881	0.33713	2.12939	0.0332221	NA	Coding
Ppp5c	167.131	-0.222598	0.104714	-2.12578	0.0335218	0.366476	Coding
Usb1	77.1742	0.303493	0.142847	2.1246	0.0336202	0.367012	Coding
Ccl4	18103	0.612356	0.288341	2.12372	0.0336937	0.367276	Coding
Map3k14	54.8349	0.346401	0.163187	2.12273	0.0337768	0.367644	Coding
Pqlc1	14.6707	0.770393	0.363064	2.12192	0.0338445	NA	Coding
Adam17	247.233	0.217671	0.10267	2.1201	0.0339978	0.369231	Coding
Capns1	976.262	0.131696	0.0621261	2.11981	0.0340219	0.369231	Coding
Gm12500	1.20708	2.58798	1.22095	2.11964	0.0340362	NA	Predicted
Cenpc1	86.3621	-0.313106	0.147804	-2.11839	0.0341422	0.369481	Coding
Mthfd1l	158.49	-0.231037	0.109064	-2.11837	0.0341441	0.369481	Coding
Armc7	191.581	0.268114	0.1267	2.11614	0.0343333	0.37063	Coding
Ube2n	1094.67	-0.112239	0.053057	-2.11545	0.0343919	0.37063	Coding
Sapcd2	69.7412	-0.520077	0.245918	-2.11484	0.0344439	0.37063	Coding
Uba7	66.8181	0.353392	0.167136	2.1144	0.0344809	0.37063	Coding
Tiprl	614.104	-0.155756	0.0736938	-2.11355	0.0345534	0.37063	Coding
Ric8a	206.364	0.200919	0.0950901	2.11293	0.0346067	0.37063	Coding
B4galt1	373.319	0.157665	0.0746673	2.11157	0.0347232	0.37063	Coding
AC153546.1	20.0875	-0.595289	0.281918	-2.11157	0.0347234	NA	Noncoding
Pfas	57.455	-0.4502	0.213234	-2.1113	0.0347466	0.37063	Coding
Ssbp4	721.998	0.125123	0.0592769	2.11082	0.0347876	0.37063	Coding
Gabrr1	4.22307	-1.62822	0.771428	-2.11066	0.0348015	NA	Coding
Gm37347	1.04334	-2.6079	1.23612	-2.10975	0.0348798	NA	Predicted
Aar2	68.1036	0.31675	0.150169	2.10929	0.0349199	0.37063	Coding
Gm19726	3.9093	1.36974	0.649492	2.10893	0.0349503	NA	Predicted
Sin3b	900.288	0.140814	0.0667753	2.10878	0.0349636	0.37063	Coding
Farsa	247.158	-0.184469	0.0874872	-2.10853	0.0349854	0.37063	Coding
Myo1c	49.3043	-0.398941	0.189229	-2.10825	0.0350097	0.37063	Coding
Ccar1	446.371	-0.155644	0.0738286	-2.10818	0.035015	0.37063	Coding
Ccl5	14417	0.832662	0.395128	2.10732	0.0350895	0.37063	Coding
Swi5	1058.03	-0.104514	0.0495957	-2.10732	0.0350899	0.37063	Coding
Cd28	1465.09	0.227785	0.108096	2.10724	0.0350966	0.37063	Coding
Sgip1	11.2699	0.90524	0.429665	2.10685	0.0351304	NA	Coding
Galm	18.6999	-0.644646	0.306054	-2.10631	0.0351772	NA	Coding
Fndc3b	17.5065	-0.693565	0.329286	-2.10627	0.0351808	NA	Coding
Chd2	205.799	0.242988	0.115365	2.10625	0.0351827	0.371013	Coding
Csf2ra	16.6303	-0.649814	0.308565	-2.10593	0.0352108	NA	Coding
Rft1	30.5545	-0.483018	0.229428	-2.10532	0.0352637	NA	Coding
Esco2	120.007	-0.349169	0.165964	-2.10389	0.0353885	0.372655	Coding
Pofut1	35.2393	-0.428974	0.204065	-2.10215	0.0355404	NA	Coding
Notch2	70.9609	0.372631	0.177407	2.10042	0.0356915	0.374694	Coding
Ier5	883.394	0.274586	0.130743	2.1002	0.0357116	0.374694	Coding
Mir6236	97.7727	0.288962	0.137604	2.09995	0.0357331	0.374694	Noncoding
Ubtf	413.042	-0.161769	0.0770857	-2.09857	0.035855	0.374917	Coding
Snapc1	169.437	0.240139	0.11443	2.09857	0.0358551	0.374917	Coding
Ctbp2	21.1018	0.601314	0.286618	2.09796	0.0359082	NA	Coding
Als2cr12	1.08473	-2.59196	1.23562	-2.0977	0.0359313	NA	Coding
BC051226	27.6879	0.504241	0.240412	2.09741	0.0359576	NA	Noncoding
4933434E20Rik	310.454	0.191358	0.0913118	2.09565	0.0361128	0.377083	Coding
Epc1	190.328	0.207735	0.0991623	2.09489	0.0361804	0.377259	Coding
St8sia1	22.5618	1.062	0.506976	2.09478	0.0361903	NA	Coding
Bcor	106.633	-0.272947	0.130368	-2.09366	0.0362898	0.377871	Coding
Pik3ip1	52.6604	0.540433	0.258286	2.09238	0.0364043	0.378062	Coding
Map1lc3a	108.422	0.298643	0.142733	2.09232	0.0364098	0.378062	Coding
Gm11560	8.27822	0.875985	0.418681	2.09225	0.0364162	NA	Predicted
Hspa5	2938.19	0.153725	0.0735247	2.0908	0.0365461	0.37895	Coding
Crebrf	201.825	0.239165	0.114515	2.08851	0.0367517	0.380552	Coding
Gm45855	20.8617	0.533012	0.255365	2.08725	0.0368652	NA	Predicted
Orc6	269.365	-0.28277	0.13552	-2.08656	0.0369277	0.381827	Coding
Trbv13-1	3.84153	1.75985	0.843548	2.08625	0.0369559	NA	Coding
Pcbp2	1813.18	-0.100665	0.0482669	-2.0856	0.037015	0.381827	Coding
H60b	82.3562	0.414596	0.198847	2.085	0.0370693	0.381827	Coding
Ptp4a1	332.893	0.180815	0.0867266	2.08488	0.03708	0.381827	Coding
Ypel3	464.892	0.200753	0.096321	2.08421	0.0371415	0.381931	Coding
Sntb1	20.1006	0.559564	0.268547	2.08367	0.0371902	NA	Coding
Yrdc	188.334	0.278336	0.13364	2.08273	0.0372761	0.382787	Coding
Tmod1	17.7197	-0.610163	0.29324	-2.08076	0.0374556	NA	Coding
Ccdc122	11.2402	-0.75539	0.363165	-2.08002	0.037524	NA	Coding
Mtx2	196.624	-0.198505	0.0954749	-2.07913	0.0376053	0.385636	Coding
Blm	69.2822	-0.341247	0.164241	-2.07772	0.0377351	0.386435	Coding
Bst1	28.6852	-0.579176	0.278805	-2.07735	0.0377694	NA	Coding
Izumo4	114.644	0.269039	0.129529	2.07705	0.0377966	0.386491	Coding
Golim4	149.49	-0.2405	0.115836	-2.07622	0.0378736	0.386491	Coding
Tnfsf10	290.893	-0.340011	0.163854	-2.07509	0.0379781	0.386491	Coding
Gm11263	28.1776	0.470449	0.226741	2.07483	0.0380023	NA	Predicted
Cdca5	77.031	-0.370354	0.178542	-2.07432	0.0380496	0.386491	Coding
Eif3a	1301.53	-0.133561	0.0643944	-2.0741	0.0380698	0.386491	Coding
Gadd45b	832.684	0.648399	0.31278	2.07302	0.0381706	0.386491	Coding
Nrp1	42.5563	-0.567013	0.273539	-2.07288	0.0381837	NA	Coding
Prep	64.4907	-0.324694	0.156692	-2.07217	0.0382491	0.386491	Coding
Hnrnpa2b1	3085.14	-0.091383	0.0441038	-2.072	0.0382655	0.386491	Coding
Tmem33	331.122	0.182461	0.0880747	2.07166	0.0382971	0.386491	Coding
Bub1	94.7866	-0.294949	0.142394	-2.07136	0.0383255	0.386491	Coding
Mcm2	240.224	-0.221127	0.106765	-2.07115	0.0383447	0.386491	Coding
Adamts6	97.2995	-0.285291	0.137759	-2.07095	0.0383636	0.386491	Coding
Trav9-4	4.24653	-2.52044	1.21788	-2.06953	0.0384966	NA	Coding
Rgs3	373.308	0.230616	0.111505	2.06821	0.0386202	0.388551	Coding
Soat1	234.489	-0.224487	0.108594	-2.06722	0.0387137	0.388838	Coding
Ifi30	36.2959	-0.466237	0.225542	-2.06719	0.0387163	NA	Noncoding
Socs1	375.677	0.24626	0.11915	2.0668	0.0387532	0.388838	Coding
2010001A14Rik	46.1257	0.351272	0.170082	2.06532	0.0388932	NA	Noncoding
Smc1a	719.907	-0.124387	0.0602363	-2.06498	0.0389248	0.389085	Coding
Mre11a	123.265	-0.231047	0.111906	-2.06465	0.0389562	0.389085	Coding
Mtbp	52.3041	-0.370731	0.179619	-2.06399	0.0390189	0.389085	Coding
Mcts2	18.1009	-0.620763	0.300825	-2.06354	0.0390617	NA	Coding
Mysm1	200.011	0.182897	0.0886448	2.06325	0.0390886	0.389085	Coding
CT571252.1	2.47051	1.84614	0.894776	2.06324	0.0390899	NA	Noncoding
Zfpm1	140.907	-0.225345	0.109266	-2.06236	0.0391733	0.389085	Coding
Atg2a	71.452	0.301756	0.146317	2.06234	0.0391757	0.389085	Coding
Lsp1	2433.65	0.15055	0.0730039	2.06222	0.0391869	0.389085	Coding
Aurka	72.7652	-0.318014	0.154217	-2.06212	0.039196	0.389085	Coding
Gm26909	9.85745	-0.915317	0.44392	-2.0619	0.0392176	NA	Predicted
Nkrf	15.2908	-0.634688	0.308296	-2.0587	0.0395234	NA	Coding
Homez	15.432	-0.674218	0.32753	-2.05849	0.0395432	NA	Coding
Gabarap	1833.37	0.111339	0.0541285	2.05695	0.0396911	0.393245	Coding
Tspan6	12.4388	-0.865361	0.420852	-2.05621	0.0397623	NA	Coding
St8sia4	195.902	0.280764	0.136561	2.05596	0.0397867	0.393245	Coding
P4hb	591.883	-0.182649	0.0888439	-2.05584	0.039798	0.393245	Coding
Otos	10.3407	0.790157	0.384355	2.0558	0.0398017	NA	Coding
Wwp2	97.9036	-0.262096	0.127507	-2.05555	0.0398263	0.393245	Coding
Gm8326	12.341	-0.737589	0.358855	-2.0554	0.0398405	NA	Predicted
Trav7-4	5.21051	1.52124	0.740881	2.05328	0.0400453	NA	Coding
Mtus1	1.27389	2.67721	1.30389	2.05324	0.0400488	NA	Coding
Gm20186	93.0094	0.435432	0.212149	2.05248	0.0401228	0.394911	Predicted
Pole2	53.389	-0.386062	0.188134	-2.05205	0.0401644	0.394911	Coding
Actr1b	192.649	-0.295468	0.144034	-2.05138	0.0402298	0.394911	Coding
Slfn1	350.656	0.407529	0.198768	2.05028	0.0403372	0.394911	Coding
Snrpg	2193.6	-0.0839338	0.0409395	-2.05019	0.0403458	0.394911	Coding
Fam46c	155.704	0.342131	0.166909	2.0498	0.0403835	0.394911	Coding
Gm7666	19.0298	0.593695	0.289698	2.04936	0.0404269	NA	Predicted
Ccr2	502.163	0.934157	0.455994	2.04862	0.0404994	0.394911	Coding
Rnf169	51.8786	0.360159	0.175829	2.04834	0.0405262	0.394911	Coding
Pde7a	271.267	0.323853	0.158152	2.04773	0.0405861	0.394911	Coding
Skap1	1867.09	0.151877	0.074181	2.04739	0.0406202	0.394911	Coding
Knl1	195.06	-0.307663	0.150316	-2.04678	0.04068	0.394911	Coding
Gm10443	121.258	-0.260787	0.127414	-2.04677	0.0406811	0.394911	Predicted
Rps18	14962.4	-0.115726	0.056542	-2.04673	0.0406846	0.394911	Ribosomal
AC091783.2	2.17331	1.90233	0.929626	2.04634	0.0407228	NA	Noncoding
Fos	375.121	0.329196	0.160916	2.04576	0.0407799	0.395321	Coding
Lrrc75a	9.55164	-0.830612	0.406045	-2.04561	0.0407944	NA	Coding
Gpat2	3.09999	1.86725	0.91282	2.04559	0.0407969	NA	Coding
Sil1	50.2141	-0.343846	0.168201	-2.04426	0.0409283	0.396243	Coding
Aplf	15.4852	-0.638907	0.312549	-2.04418	0.0409355	NA	Coding
Irf4	280.721	0.245448	0.120119	2.04337	0.041016	0.396577	Coding
Cipc	46.1732	0.41945	0.205423	2.04188	0.0411632	NA	Coding
Hmgn5	302.521	-0.215368	0.105491	-2.04158	0.0411929	0.39777	Coding
Tmprss6	23.0936	-0.91789	0.449642	-2.04138	0.041213	NA	Coding
Gm9442	1.86747	2.10663	1.03232	2.04068	0.0412831	NA	Predicted
Gspt2	8.33826	0.918873	0.450369	2.04027	0.0413238	NA	Coding
Dync1li1	197.67	-0.193514	0.0948977	-2.03918	0.0414318	0.398842	Coding
Gm37474	294.335	0.225954	0.110857	2.03825	0.0415248	0.398842	Predicted
Fam103a1	347.363	0.167704	0.0822855	2.03807	0.0415426	0.398842	Coding
Farsb	211.004	-0.188947	0.0927394	-2.0374	0.04161	0.398842	Coding
Cdc42ep3	189.153	0.261754	0.128489	2.03717	0.0416327	0.398842	Coding
Lhfpl3	7.02778	1.12878	0.554428	2.03593	0.0417569	NA	Coding
Tubb6	162.663	-0.325941	0.1601	-2.03586	0.0417649	0.398842	Coding
Rpsa-ps2	39.0539	-0.441886	0.217093	-2.03547	0.0418038	NA	Noncoding
Atp2a2	305.296	-0.184526	0.0906581	-2.03541	0.0418097	0.398842	Coding
Kif15	289.977	-0.2912	0.143096	-2.035	0.0418513	0.398842	Coding
Ndufa6	1546.26	0.109832	0.0539808	2.03464	0.0418869	0.398842	Coding
Cse1l	107.051	-0.281479	0.138384	-2.03404	0.041948	0.398842	Coding
Cdkn2aip	89.0706	0.300043	0.14752	2.03392	0.0419596	0.398842	Coding
Pelp1	70.3658	-0.31064	0.152802	-2.03296	0.0420566	0.398842	Coding
Fbxw8	52.7753	-0.356508	0.175384	-2.03273	0.04208	0.398842	Coding
Dennd4c	99.2878	0.309229	0.152125	2.03273	0.04208	0.398842	Coding
Atg3	336.445	0.164867	0.0811169	2.03246	0.0421075	0.398842	Coding
Insrr	4.3095	-1.20889	0.595228	-2.03097	0.0422581	NA	Coding
Leprotl1	961.869	0.133696	0.0658582	2.03006	0.0423501	0.400287	Coding
Nudcd2	451.39	-0.151688	0.0747445	-2.02941	0.0424161	0.400287	Coding
Ttc14	623.971	0.141362	0.0696582	2.02936	0.0424213	0.400287	Coding
A530083M17Rik	64.6466	-0.361	0.177949	-2.02867	0.0424919	0.400338	Noncoding
Hhat	7.33229	-0.94666	0.466645	-2.02865	0.0424936	NA	Coding
Mief2	29.4766	0.547783	0.270034	2.02857	0.0425017	NA	Coding
Sdhaf3	53.4019	-0.372009	0.183413	-2.02825	0.0425342	0.400338	Coding
Lig1	426.48	-0.214062	0.105666	-2.02583	0.0427825	0.402166	Coding
Itgb8	4.92995	-1.22516	0.605093	-2.02474	0.0428939	NA	Coding
Gm20257	32.3387	0.492784	0.243449	2.02418	0.0429517	NA	Predicted
Siglecf	19.3677	-0.716718	0.354085	-2.02414	0.0429558	NA	Coding
Lmbr1l	63.5213	0.323873	0.160123	2.02265	0.0431092	0.404726	Coding
Ifit1bl1	20.1456	0.842687	0.416635	2.0226	0.043114	NA	Coding
Brca2	63.3458	-0.341466	0.168884	-2.0219	0.0431868	0.404944	Coding
Rab11fip2	99.6014	0.281997	0.139583	2.02029	0.0433537	0.405818	Coding
Ccnb1ip1	21.5833	0.671429	0.332358	2.0202	0.0433629	NA	Coding
Ogdh	274.749	-0.168245	0.0832916	-2.01995	0.043389	0.405818	Coding
Snhg5	130.928	-0.264933	0.131403	-2.01619	0.0437803	0.408807	Noncoding
Gm9493	49.1996	0.363884	0.180514	2.01582	0.0438184	0.408807	Predicted
Pim1	887.558	0.538033	0.267074	2.01455	0.0439518	0.409538	Coding
Gm11707	15.8869	0.70958	0.352393	2.01361	0.0440507	NA	Predicted
Pold1	100.391	-0.310105	0.154057	-2.01293	0.0441221	0.410197	Coding
Zdhhc2	230.769	-0.214405	0.106519	-2.01283	0.0441327	0.410197	Coding
AC139323.1	5.08853	-1.06288	0.528162	-2.01241	0.0441772	NA	Noncoding
Myh9	1157.34	-0.17692	0.0879273	-2.01211	0.044208	0.410384	Coding
A930007I19Rik	9.8465	0.865338	0.43021	2.01143	0.0442799	NA	Noncoding
1110038F14Rik	204.747	0.185864	0.0924209	2.01107	0.0443185	0.410898	Coding
Pag1	35.0523	0.543554	0.270339	2.01064	0.0443634	NA	Coding
Gemin2	107.328	-0.252398	0.125542	-2.01046	0.0443824	0.410978	Coding
H2-Ob	1.47682	2.85041	1.41915	2.00854	0.044586	NA	Coding
Man1a2	361.47	0.178424	0.0888386	2.00841	0.0445999	0.411646	Coding
Nmt1	384.509	-0.152214	0.0757904	-2.00836	0.0446055	0.411646	Coding
Asb8	100.188	0.261705	0.130317	2.00822	0.0446203	0.411646	Coding
Ect2	58.0007	-0.373055	0.18584	-2.0074	0.0447072	0.411937	Coding
Gm8251	3.6309	1.33977	0.667555	2.00698	0.0447514	NA	Predicted
Dnttip2	317.39	0.187667	0.0935278	2.00653	0.0447994	0.412229	Coding
Tm9sf1	139.985	-0.211153	0.105257	-2.00606	0.0448497	0.412229	Coding
Cdc7	112.104	-0.264909	0.132091	-2.0055	0.0449092	0.412268	Coding
Napb	3.05516	-2.02032	1.00742	-2.00543	0.0449167	NA	Coding
Gm16033	1.61905	2.48408	1.239	2.00491	0.0449728	NA	Predicted
2200002D01Rik	6.94018	-1.01386	0.505754	-2.00465	0.0450003	NA	Coding
Hn1l	72.1088	-0.338053	0.168679	-2.00412	0.0450573	0.413118	Coding
Dzip1	12.0945	0.803607	0.401064	2.00369	0.0451033	NA	Coding
Mmp17	1.69656	2.07242	1.03541	2.00154	0.0453345	NA	Coding
Gpr18	171.019	0.448445	0.224353	1.99883	0.0456264	0.416947	Coding
Tnf	243.522	0.636626	0.318543	1.99856	0.0456565	0.416947	Coding
Bnip3l	725.245	0.135235	0.0676846	1.99801	0.0457151	0.416947	Coding
Mis18bp1	87.9922	-0.296268	0.148298	-1.99779	0.0457396	0.416947	Coding
Gle1	75.7965	-0.307407	0.153886	-1.99762	0.0457575	0.416947	Coding
Abracl	2887.66	0.125391	0.0627857	1.99713	0.0458109	0.416947	Coding
Scimp	119.6	-0.340091	0.170406	-1.99576	0.0459598	0.417791	Coding
AC160962.1	2.23872	1.67371	0.839513	1.99367	0.0461878	NA	Coding
Rps18-ps1	8.27483	-0.825986	0.414327	-1.99356	0.0461999	NA	Ribosomal
Fen1	245.533	-0.221584	0.111191	-1.99281	0.0462818	0.419819	Coding
Mfge8	51.1641	-0.392275	0.196875	-1.99251	0.0463155	0.419819	Coding
Nrd1	398.359	0.152249	0.0764238	1.99217	0.0463521	0.419819	Coding
Akap2	10.1964	-0.930478	0.46712	-1.99195	0.046377	NA	Coding
Meis3	29.2007	0.429199	0.215467	1.99195	0.0463771	NA	Coding
Mta3	259.901	0.173668	0.0872339	1.99083	0.0464993	0.420511	Coding
Fxyd5	9280.46	0.14023	0.0704514	1.99045	0.0465414	0.420511	Coding
D230025D16Rik	29.7482	-0.449572	0.225886	-1.99026	0.0465625	NA	Coding
Tbc1d4	89.7119	-0.538101	0.270499	-1.98929	0.0466688	0.421151	Coding
Gm43672	28.8931	0.453737	0.228135	1.9889	0.0467123	NA	Predicted
Atp11a	20.8391	-0.513016	0.257975	-1.98863	0.0467424	NA	Coding
Kctd12b	1.22911	2.55055	1.28279	1.98829	0.0467796	NA	Coding
Kntc1	30.1255	-0.507232	0.255168	-1.98783	0.0468302	NA	Coding
Cecr6	2.88326	-1.59912	0.804514	-1.98768	0.0468471	NA	Coding
Ptma	19286.5	-0.130001	0.0654195	-1.98719	0.0469012	0.422736	Coding
Spaca1	4.80455	-1.15211	0.579902	-1.98674	0.0469515	NA	Coding
Lclat1	77.3193	-0.367746	0.185151	-1.9862	0.0470116	0.423218	Coding
Ptges2	52.9648	-0.331439	0.166923	-1.98558	0.0470796	0.423318	Coding
4933431E20Rik	9.19129	0.946916	0.477041	1.98498	0.047147	NA	Noncoding
Dync1h1	168.571	-0.20638	0.103976	-1.98489	0.0471566	0.423499	Coding
Exph5	40.6023	-0.450336	0.227054	-1.98339	0.0473243	NA	Coding
Cdc6	67.0632	-0.347208	0.175178	-1.98203	0.0474764	0.424794	Coding
Foxj1	1.98388	1.80023	0.908287	1.982	0.0474791	NA	Coding
2600006K01Rik	4.77496	1.07715	0.543467	1.98199	0.0474799	NA	Noncoding
Nedd4l	2.84597	1.7283	0.872141	1.98168	0.0475155	NA	Coding
Tonsl	891.69	0.119586	0.0603529	1.98145	0.0475413	0.424794	Coding
R3hdm4	423.316	0.152264	0.076866	1.9809	0.0476021	0.424794	Coding
Gtpbp1	114.984	-0.256668	0.12959	-1.98062	0.0476337	0.424794	Coding
Lcn4	59.2652	0.432242	0.21828	1.98022	0.047679	0.424794	Coding
Zfyve16	53.3855	0.338113	0.170771	1.97993	0.0477117	0.424794	Coding
Rps19-ps1	6.14214	1.01163	0.511043	1.97954	0.0477551	NA	Ribosomal
Syngr4	2.84362	-1.56697	0.791735	-1.97916	0.0477977	NA	Coding
Akt2	252.631	0.179855	0.0908784	1.97907	0.0478079	0.424794	Coding
Maf1	289.1	0.154544	0.0781188	1.97833	0.047892	0.424794	Coding
Pidd1	22.9795	-0.553315	0.279715	-1.97814	0.0479133	NA	Coding
Gm3788	50.2883	0.355316	0.179696	1.97731	0.0480062	0.424794	Predicted
2010016I18Rik	64.5831	0.351394	0.177735	1.97707	0.0480342	0.424794	Noncoding
Rps6ka3	234.752	-0.19036	0.0962854	-1.97704	0.0480372	0.424794	Ribosomal
Tln2	6.79408	-0.998043	0.50482	-1.97703	0.0480387	NA	Coding
Pou2f1	70.9162	-0.28083	0.142059	-1.97686	0.0480576	0.424794	Coding
Ndufc2	1043.02	-0.104165	0.0527006	-1.97654	0.0480933	0.424794	Coding
Sfxn1	287.613	-0.201636	0.102017	-1.97649	0.0480995	0.424794	Coding
Gm6851	20.2831	0.573244	0.290065	1.97626	0.0481255	NA	Predicted
Gm26525	9.5327	-0.829945	0.42003	-1.97592	0.0481642	NA	Predicted
AC159815.1	149.04	-0.212299	0.10746	-1.97562	0.0481977	0.425156	Noncoding
Ndc1	36.3249	-0.409159	0.207112	-1.97555	0.0482061	NA	Coding
Wdr31	5.19958	1.05054	0.531989	1.97473	0.0482988	NA	Coding
Olfr635	2.06098	1.86806	0.946172	1.97434	0.0483431	NA	Coding
Lilrb4a	1.21761	2.51962	1.27673	1.9735	0.0484391	NA	Coding
Bach1	59.3912	0.395813	0.200587	1.97328	0.0484641	0.427	Coding
Lyrm9	206.176	-0.214758	0.108903	-1.97201	0.0486084	0.427765	Coding
Mark4	39.9216	0.405845	0.205911	1.97097	0.0487268	NA	Coding
Suv39h1	78.0075	-0.290942	0.147632	-1.97073	0.0487547	0.428546	Coding
Pum2	451.5	-0.144342	0.073282	-1.96969	0.0488744	0.428645	Coding
Cbx3	1371.49	-0.119238	0.0605385	-1.96963	0.0488811	0.428645	Coding
Hbb-bs	4.00565	-1.34272	0.681718	-1.96961	0.0488829	NA	Coding
Gm26620	3.43753	1.55758	0.791133	1.96879	0.0489772	NA	Predicted
Was	290.687	0.160804	0.0817045	1.96812	0.0490547	0.429538	Coding
Sec61a1	235.877	-0.171269	0.0870486	-1.96751	0.0491241	0.429538	Coding
Nde1	162.254	-0.215284	0.109435	-1.96724	0.049156	0.429538	Coding
Gm15921	3.87717	1.16204	0.590711	1.96718	0.0491624	NA	Predicted
Gm14005	41.7272	0.381078	0.193787	1.96648	0.0492426	NA	Predicted
Gm12976	3.75728	-1.86841	0.950373	-1.96597	0.0493021	NA	Predicted
Hjurp	125.48	-0.236269	0.120192	-1.96576	0.0493268	0.430525	Coding
4930535E02Rik	4.08486	-1.48813	0.757529	-1.96445	0.0494778	NA	Noncoding
Ctse	277.847	0.208154	0.105971	1.96426	0.0495001	0.431532	Coding
A530040E14Rik	61.6357	0.40293	0.205277	1.96286	0.0496619	0.43174	Noncoding
D630039A03Rik	38.2038	-0.447835	0.22817	-1.96273	0.0496775	NA	Coding
Ormdl1	267.337	-0.175319	0.0893256	-1.9627	0.0496812	0.43174	Coding
Psme1	2970.68	0.10508	0.0535512	1.96224	0.0497351	0.43174	Coding
Cd80	59.3567	0.353457	0.180154	1.96197	0.0497663	0.43174	Coding
Mctp2	63.5184	0.317451	0.161836	1.96156	0.0498139	0.43174	Coding
Atp2b1	589.202	0.183203	0.0934462	1.96051	0.0499359	0.432294	Coding
Dixdc1	5.67668	-1.10322	0.563588	-1.9575	0.0502889	NA	Coding
Nap1l4	482.923	-0.127516	0.0651655	-1.95681	0.0503697	0.435302	Coding
H2-T23	2235.89	0.210883	0.107783	1.95655	0.0504003	0.435302	Coding
Ifi206	62.8315	0.648207	0.331513	1.9553	0.0505478	0.435593	Coding
Jmy	50.7061	0.392202	0.200587	1.95527	0.050551	0.435593	Coding
Ppat	176.594	-0.216466	0.110749	-1.95457	0.0506337	0.435801	Coding
Pde3b	309.813	0.239082	0.122384	1.95354	0.0507558	0.43624	Coding
C1ql3	18.5094	-0.822437	0.421027	-1.95341	0.0507714	NA	Coding
Iqsec1	131.896	-0.22063	0.112961	-1.95315	0.0508019	0.43624	Coding
Kif2c	56.7824	-0.338914	0.173731	-1.9508	0.0510814	0.437641	Coding
Cdkn2aipnl	239.886	-0.16647	0.0853349	-1.95079	0.0510826	0.437641	Coding
Psmd4	981.86	0.106177	0.0544633	1.94951	0.0512343	0.438282	Coding
Gabpa	137.76	-0.267068	0.137033	-1.94893	0.0513038	0.438282	Coding
Tpcn1	19.6335	0.572023	0.29351	1.94891	0.0513067	NA	Coding
Gbp8	195.977	0.238138	0.122215	1.94851	0.051354	0.438282	Coding
Stip1	422.54	-0.142239	0.0730113	-1.94818	0.0513929	0.438282	Coding
Gm15789	1.39901	2.42047	1.24258	1.94794	0.0514218	NA	Predicted
Gm26916	2.23819	1.68185	0.863629	1.94743	0.0514836	NA	Predicted
5430420F09Rik	1.36268	2.20945	1.13483	1.94695	0.0515409	NA	Noncoding
Ykt6	128.698	-0.218982	0.112477	-1.94691	0.0515456	0.439081	Coding
Lrig2	28.0806	0.44474	0.22862	1.94532	0.051736	NA	Coding
Tjp2	14.1194	-0.792538	0.407444	-1.94515	0.0517573	NA	Coding
Il6ra	13.4774	0.786398	0.404403	1.94459	0.0518244	NA	Coding
Hdlbp	345.297	-0.155888	0.0801755	-1.94433	0.0518553	0.441014	Coding
Gm37472	53.7212	0.336315	0.172998	1.94404	0.051891	0.441014	Predicted
Gm9790	33.8907	0.430585	0.221754	1.94172	0.0521706	NA	Predicted
Dek	1533.77	-0.110856	0.0570953	-1.94159	0.0521863	0.442514	Coding
Ano10	60.6774	0.306329	0.157772	1.94159	0.0521863	0.442514	Coding
Syn1	6.78341	-0.925135	0.477041	-1.93932	0.0524624	NA	Coding
Cox16	131.589	0.217056	0.111948	1.9389	0.0525141	0.44347	Coding
Ramp3	116.602	0.691391	0.356628	1.93869	0.052539	0.44347	Coding
Ralgapa1	117.315	-0.230886	0.119107	-1.93848	0.0525645	0.44347	Coding
Trps1	320.804	-0.237599	0.122573	-1.93844	0.0525701	0.44347	Coding
Tbc1d22a	72.445	0.279036	0.143965	1.93822	0.0525969	0.44347	Coding
Spx	1.97592	-1.83023	0.944814	-1.93714	0.0527288	NA	Coding
Atox1	1225.21	0.0962196	0.049684	1.93663	0.0527907	0.444094	Coding
Scp2	885.773	0.113928	0.0588306	1.93655	0.0528002	0.444094	Coding
Muc4	1.89452	2.19033	1.13117	1.93633	0.0528268	NA	Coding
Krtcap2	2342.66	0.098824	0.0510422	1.93612	0.0528524	0.444094	Coding
Mrpl30	754.272	0.132482	0.0684427	1.93566	0.0529096	0.444094	Coding
Ckap2	70.0473	-0.324561	0.167744	-1.93486	0.0530076	0.444286	Coding
Snx15	96.1075	0.263066	0.136069	1.93332	0.0531963	0.444286	Coding
Kdm5b	103.192	0.227771	0.117828	1.93308	0.0532264	0.444286	Coding
Mrto4	379.408	-0.194751	0.100748	-1.93305	0.0532299	0.444286	Coding
Rnf166	448.401	0.15869	0.0820934	1.93304	0.0532307	0.444286	Coding
Fam32a	523.896	0.142277	0.0736396	1.93207	0.0533513	0.444525	Coding
Gmfb	415.795	-0.141375	0.0731815	-1.93184	0.0533788	0.444525	Coding
0610009B22Rik	79.5648	-0.286131	0.148168	-1.93113	0.0534667	0.444759	Coding
Csf2rb	3.36552	-2.28517	1.18347	-1.93091	0.0534941	NA	Coding
Gm4208	2.61492	1.60111	0.829297	1.93068	0.0535229	NA	Predicted
Dzip3	58.7666	-0.361479	0.187322	-1.92972	0.0536412	0.445124	Coding
Ubap2	181.152	-0.184183	0.0954525	-1.92958	0.0536587	0.445124	Coding
G430095P16Rik	6.16852	1.03417	0.536048	1.92925	0.0536995	NA	Coding
Uhmk1	177.587	-0.214361	0.111146	-1.92865	0.0537748	0.445124	Coding
Mxd1	214.1	0.328051	0.170166	1.92783	0.0538763	0.445124	Coding
Syngr3	2.65307	-1.58126	0.820354	-1.92754	0.0539127	NA	Coding
Pspc1	206.096	0.169334	0.0878505	1.92752	0.053915	0.445124	Coding
Atp6v1f	1834.7	0.101607	0.052719	1.92734	0.0539377	0.445124	Coding
Slc39a2	1.06698	-2.58302	1.34022	-1.92731	0.0539415	NA	Coding
Minos1	2147.75	-0.0839479	0.0435768	-1.92643	0.0540501	0.445124	Coding
Gm28438	1385.44	0.127728	0.0663076	1.92629	0.0540683	0.445124	Predicted
Myd88	110.755	0.248143	0.128819	1.92629	0.0540687	0.445124	Coding
Hist1h4n	10.6773	-0.755055	0.391992	-1.9262	0.0540791	NA	Coding
Slf1	89.9202	-0.261454	0.135752	-1.92597	0.0541084	0.445124	Coding
Gm2225	91.5199	0.252804	0.131319	1.92511	0.0542151	0.445509	Predicted
Atp1a1	590.472	-0.171868	0.0893294	-1.92398	0.0543574	0.445765	Coding
Fh1	281.979	-0.170766	0.08876	-1.92391	0.054366	0.445765	Coding
Rdh13	12.1341	0.669326	0.348015	1.92327	0.0544463	NA	Coding
Nr4a2	1509.98	-0.272656	0.141794	-1.9229	0.0544927	0.446312	Coding
Gm36931	35.4026	0.469831	0.244423	1.9222	0.05458	NA	Predicted
2810402E24Rik	63.7694	-0.292306	0.152126	-1.92148	0.0546714	0.447284	Noncoding
Fancd2	24.8585	-0.549445	0.286115	-1.92037	0.0548117	NA	Coding
n-R5-8s1	9.25249	-0.807469	0.42076	-1.91907	0.0549752	NA	Noncoding
Siah2	140.554	0.239208	0.124656	1.91894	0.0549921	0.448957	Coding
Mob1a	486.313	-0.137076	0.0714488	-1.91852	0.0550448	0.448957	Coding
Oip5	6.29251	-0.922023	0.480707	-1.91806	0.0551036	NA	Coding
Cd86	93.3829	0.486546	0.253718	1.91766	0.0551539	0.448957	Coding
Sp140	567.761	0.161776	0.0843664	1.91754	0.0551689	0.448957	Coding
Elk3	394.367	-0.200337	0.10448	-1.91748	0.0551773	0.448957	Coding
Rragb	11.6122	0.681054	0.355291	1.91689	0.0552518	NA	Coding
Ywhaz	1551	-0.084495	0.0441009	-1.91595	0.055372	0.450048	Coding
Mier1	547.823	0.136091	0.0710717	1.91484	0.0555124	0.450281	Coding
Topors	159.551	0.193286	0.100945	1.91477	0.0555216	0.450281	Coding
Gm15283	80.1084	0.34816	0.181941	1.91358	0.0556733	0.45102	Predicted
Snhg9	16.1632	-0.553245	0.289171	-1.91321	0.0557214	NA	Noncoding
Gm26982	12.8041	0.638391	0.333768	1.91268	0.0557895	NA	Predicted
Anp32b	2743.13	-0.124232	0.0649551	-1.91257	0.0558025	0.451576	Coding
Arl6ip1	2978.3	-0.199167	0.104188	-1.91161	0.0559262	0.451603	Coding
Ifit3	136.641	0.719702	0.376492	1.9116	0.0559272	0.451603	Coding
E330020D12Rik	1.67097	-2.1437	1.12146	-1.91152	0.055938	NA	Noncoding
C130089K02Rik	4.54551	-1.27929	0.669589	-1.91057	0.0560605	NA	Noncoding
Prmt1	753.932	-0.14479	0.0758121	-1.90986	0.0561514	0.452609	Coding
Ncald	70.1731	0.380369	0.199179	1.90969	0.0561734	0.452609	Coding
Smad4	201.836	0.180373	0.0945089	1.90853	0.0563229	0.452875	Coding
Ifitm3	1525.86	0.285548	0.14962	1.90849	0.056328	0.452875	Coding
Igsf9b	27.2181	-0.560563	0.293787	-1.90806	0.0563837	NA	Coding
Ptcra	1.29459	-2.87677	1.50786	-1.90785	0.0564109	NA	Coding
mt-Ta	1.07033	-2.57047	1.34806	-1.90679	0.0565484	NA	Mitochondrial
Zfp451	154.852	-0.197206	0.103432	-1.90663	0.0565684	0.453766	Coding
Dus2	49.8366	0.342433	0.179623	1.9064	0.056598	0.453766	Coding
Cenpp	69.6664	-0.370547	0.194429	-1.90582	0.056673	0.453766	Coding
Etv4	19.7336	-0.620201	0.325461	-1.90561	0.0567011	NA	Coding
Gm7536	1441.91	0.0958905	0.050326	1.90539	0.0567299	0.453766	Predicted
Gm26551	17.0282	0.683235	0.3586	1.90528	0.0567434	NA	Predicted
AW011738	25.5721	0.589749	0.30957	1.90506	0.0567725	NA	Coding
Erh	777.395	0.133677	0.0701843	1.90466	0.0568239	0.453766	Coding
Cd3d	6567.35	0.132154	0.0694028	1.90417	0.0568884	0.453766	Coding
Smap1	761.576	0.107265	0.0563343	1.90408	0.0568998	0.453766	Coding
Actbl2	1.01682	-3.25266	1.70865	-1.90364	0.0569572	NA	Coding
Gmds	138.711	-0.210613	0.110652	-1.90338	0.0569904	0.453766	Coding
Atp5b	3362.61	-0.10055	0.0528516	-1.90251	0.0571049	0.453766	Coding
Sytl3	350.188	0.250365	0.131622	1.90216	0.0571507	0.453766	Coding
Aimp2	182.981	-0.197155	0.103665	-1.90185	0.0571907	0.453766	Coding
Mir155hg	211.098	0.235666	0.123924	1.90169	0.0572112	0.453766	Noncoding
Pglyrp2	115.478	0.316409	0.166396	1.90154	0.0572311	0.453766	Coding
Fbxo27	3.97475	1.28795	0.677531	1.90094	0.0573094	NA	Coding
St8sia6	1.81601	2.399	1.26227	1.90055	0.0573611	NA	Coding
Atp5l	703.416	-0.141674	0.0745469	-1.90047	0.0573711	0.454391	Coding
Rps19-ps5	1.91012	1.88355	0.991568	1.89957	0.0574901	NA	Ribosomal
Ccdc167	98.4443	-0.259737	0.136744	-1.89944	0.0575065	0.454599	Coding
Cyp11a1	2.35878	2.08169	1.09599	1.89936	0.0575174	NA	Coding
Prdx2	862.644	-0.174107	0.091667	-1.89934	0.0575194	0.454599	Coding
Gm35082	2.25009	-1.67231	0.880689	-1.89887	0.0575815	NA	Predicted
Gm42685	28.3099	0.51035	0.268771	1.89883	0.0575868	NA	Predicted
Anln	33.0405	-0.442037	0.232813	-1.89868	0.0576063	NA	Coding
Rpn1	375.882	-0.144277	0.0759936	-1.89855	0.0576241	0.454943	Coding
Zfp202	1.61597	-2.06105	1.08589	-1.89803	0.0576927	NA	Coding
Prim1	164.539	-0.220672	0.116363	-1.89642	0.0579048	0.456675	Coding
Rora	554.451	0.338499	0.178635	1.89492	0.0581035	0.457143	Coding
Cry1	74.2332	0.339265	0.179075	1.89454	0.0581535	0.457143	Coding
1700019D03Rik	37.5674	-1.02849	0.542869	-1.89454	0.0581539	NA	Coding
Vamp7	162.162	-0.199985	0.105599	-1.89382	0.0582487	0.457143	Coding
Hdhd2	107.816	-0.234522	0.123877	-1.89318	0.0583337	0.457143	Coding
Zbp1	725.09	0.287789	0.152026	1.89303	0.058354	0.457143	Coding
Pole3	227	-0.173745	0.091789	-1.89288	0.0583742	0.457143	Coding
Dusp5	890.677	0.493219	0.260586	1.89273	0.0583939	0.457143	Coding
Isg15	461.899	0.54045	0.28563	1.89213	0.0584732	0.457283	Coding
Gm15710	44.6627	-0.337991	0.178654	-1.89187	0.0585084	NA	Predicted
Saa3	4.63289	1.19859	0.633758	1.89124	0.0585925	NA	Coding
Atn1	75.4063	-0.289569	0.153129	-1.89101	0.0586226	0.457798	Coding
Slc25a42	15.6311	-0.590785	0.312477	-1.89065	0.0586708	NA	Coding
Ccdc96	6.14807	-0.937741	0.496085	-1.89028	0.0587201	NA	Coding
Tmsb15b1	62.5355	-0.310786	0.164416	-1.89024	0.0587259	0.457798	Coding
Polr2d	196.81	0.173083	0.0915731	1.8901	0.0587441	0.457798	Coding
Nufip2	245.612	0.165906	0.0878103	1.88936	0.0588431	0.457798	Coding
Csrp1	341.684	-0.174159	0.0921977	-1.88897	0.058896	0.457798	Coding
Spata2	57.9072	0.310719	0.164499	1.88888	0.0589081	0.457798	Coding
4930578M07Rik	3.83176	-1.34848	0.71405	-1.8885	0.0589587	NA	Noncoding
Atcay	10.9386	-0.712034	0.377243	-1.88747	0.0590978	NA	Coding
Itpr1	159.719	-0.221739	0.117527	-1.88671	0.059199	0.458996	Coding
Ranbp1	1819.07	-0.166112	0.0880578	-1.8864	0.0592413	0.458996	Coding
Mgat5	89.8304	-0.29526	0.156555	-1.88598	0.0592974	0.458996	Coding
Dhfr	191.554	-0.224361	0.118968	-1.8859	0.0593089	0.458996	Coding
Syna	2.73292	-1.4321	0.759699	-1.88509	0.0594176	NA	Coding
Gm10785	3.54224	-1.32741	0.704863	-1.88321	0.0596719	NA	Predicted
AI413582	178.741	0.208932	0.110968	1.88282	0.0597249	0.461736	Coding
AC159308.5	4.3519	1.11842	0.594077	1.88262	0.0597518	NA	Noncoding
Fam120aos	12.2021	0.650338	0.345477	1.88243	0.059777	NA	Noncoding
Oit3	6.33717	0.917844	0.48791	1.88118	0.059948	NA	Coding
Tcea1	524.31	0.118537	0.0630635	1.87965	0.060156	0.464068	Coding
Tarsl2	11.6708	-0.665571	0.354175	-1.87921	0.0602154	NA	Coding
Ifi209	307.688	0.361691	0.19248	1.87911	0.0602295	0.464068	Coding
Eif2b5	114.901	0.223907	0.11917	1.8789	0.0602587	0.464068	Coding
Evi2a	246.68	0.229206	0.121998	1.87877	0.0602759	0.464068	Coding
Trbv14	5.85083	1.45303	0.773959	1.8774	0.0604629	NA	Coding
Themis	342.162	0.221188	0.117823	1.8773	0.0604773	0.465138	Coding
Corin	1.25116	2.54496	1.35617	1.87658	0.0605754	NA	Coding
Hist1h1d	102.591	-0.272846	0.145453	-1.87584	0.0606773	0.465488	Coding
Aes	2884.93	0.149073	0.0794723	1.87579	0.0606839	0.465488	Coding
Tmem192	185.478	0.202626	0.108033	1.8756	0.0607104	0.465488	Coding
Cmah	45.5096	0.593267	0.31642	1.87494	0.0608016	NA	Coding
Phactr4	60.7522	-0.313964	0.167475	-1.87469	0.0608358	0.465931	Coding
Gnptg	232.83	0.197819	0.105545	1.87427	0.0608934	0.465931	Coding
AC153845.1	1.52987	1.92761	1.02887	1.87353	0.0609957	NA	Noncoding
Hcfc1r1	275.154	0.196256	0.104778	1.87307	0.0610587	0.466507	Coding
Pttg1	522.061	-0.155662	0.0831337	-1.87243	0.061147	0.466507	Coding
Ppp2r2a	340.236	0.148506	0.0793146	1.87236	0.0611565	0.466507	Coding
B230206I08Rik	35.9456	-0.425511	0.227307	-1.87197	0.0612114	NA	Noncoding
Elavl1	552.128	-0.11161	0.0596391	-1.87143	0.0612856	0.467013	Coding
Zfp968	10.5098	-0.700834	0.374655	-1.87061	0.0613992	NA	Coding
Snd1	180.802	-0.176526	0.0944035	-1.86991	0.0614957	0.467934	Coding
Rad51b	32.6523	-0.525451	0.281082	-1.86939	0.0615686	NA	Coding
AI661453	0.942648	-2.49945	1.33712	-1.86928	0.0615837	NA	Coding
Stag1	243.309	-0.167029	0.0893892	-1.86856	0.0616846	0.467934	Coding
Rexo2	838.564	-0.164422	0.0879941	-1.86855	0.0616852	0.467934	Coding
Gm13453	8.31094	0.800791	0.428566	1.86854	0.0616875	NA	Predicted
Rps19	15051.4	-0.111902	0.0598926	-1.86837	0.0617103	0.467934	Ribosomal
Taf7	249.037	0.174196	0.0932377	1.8683	0.0617208	0.467934	Coding
Prmt8	3.8771	-1.30689	0.699567	-1.86814	0.0617421	NA	Coding
Otop1	1.1188	-3.38875	1.81417	-1.86793	0.0617717	NA	Coding
Anxa1	254.762	0.531821	0.284762	1.8676	0.0618179	0.468193	Coding
Rps15a-ps8	32.0618	0.400964	0.214708	1.86748	0.061834	NA	Ribosomal
Haus1	91.3433	-0.269852	0.144615	-1.86599	0.0620421	0.468238	Coding
Erlin2	26.6596	-0.429061	0.229938	-1.86598	0.0620439	NA	Coding
Nt5m	75.1627	0.254447	0.136383	1.86568	0.0620867	0.468238	Coding
Shmt1	72.3504	-0.428575	0.229732	-1.86555	0.0621049	0.468238	Coding
Ripor2	100.442	0.462022	0.247737	1.86497	0.0621854	0.468238	Coding
Rfc3	278.501	-0.196292	0.105259	-1.86485	0.0622031	0.468238	Coding
Sntb2	129.93	0.279681	0.149995	1.86461	0.0622365	0.468238	Coding
Mfap3	85.516	0.261573	0.140298	1.86441	0.062264	0.468238	Coding
Pigt	192.142	0.202179	0.108496	1.86348	0.0623954	0.468753	Coding
Cpd	41.8827	-0.408266	0.21919	-1.86261	0.0625169	NA	Coding
Vav2	3.40645	-1.37465	0.738069	-1.86249	0.0625339	NA	Coding
Phf20l1	666.86	-0.14128	0.0758561	-1.86247	0.0625368	0.469341	Coding
Eya2	19.2244	0.582863	0.312952	1.86246	0.0625376	NA	Coding
Smad3	27.5626	0.558199	0.299985	1.86076	0.062778	NA	Coding
Pola1	127.758	-0.257703	0.138534	-1.86021	0.0628559	0.470957	Coding
Mink1	131.792	-0.233209	0.125384	-1.85996	0.0628908	0.470957	Coding
Cbr1	79.3046	0.269064	0.144689	1.8596	0.0629419	0.470957	Coding
Nudcd1	60.7173	-0.292043	0.157134	-1.85856	0.0630895	0.471101	Coding
Sowahc	15.8058	-0.562995	0.302963	-1.8583	0.0631269	NA	Coding
Srsf2	1519.46	-0.148437	0.079881	-1.85822	0.0631373	0.471101	Coding
Smc4	1234.64	-0.118518	0.0637866	-1.85804	0.0631629	0.471101	Coding
Gng10	14.007	-0.611352	0.329044	-1.85796	0.0631744	NA	Coding
Ncor1	1134.96	0.114384	0.0615848	1.85735	0.0632615	0.471101	Coding
Kif3b	74.8808	-0.2762	0.148729	-1.85706	0.0633023	0.471101	Coding
Cyp4f13	28.2808	0.460942	0.248229	1.85692	0.0633227	NA	Coding
Hist1h2bg	22.204	0.526559	0.283579	1.85683	0.0633349	NA	Coding
Lgals7	52.3739	-0.541013	0.29137	-1.85679	0.0633408	0.471101	Coding
Gm9522	7.99494	0.780001	0.420154	1.85646	0.0633873	NA	Predicted
Mrpl51	479.152	-0.136992	0.0738381	-1.8553	0.063553	0.472129	Coding
Fxyd4	1.52728	2.2618	1.2193	1.855	0.0635964	NA	Coding
Pfdn6	447.886	-0.139975	0.0754611	-1.85493	0.0636058	0.472129	Coding
Tox2	6.77428	-1.05801	0.570454	-1.85467	0.0636427	NA	Coding
Arntl	41.0846	0.418186	0.225539	1.85416	0.0637161	NA	Coding
1700030C10Rik	4.15066	1.40944	0.760155	1.85415	0.0637183	NA	Noncoding
Sh3bp1	366.768	-0.135288	0.0730232	-1.85267	0.0639302	0.473888	Coding
Gon7	121.621	-0.20719	0.11185	-1.85239	0.0639702	0.473888	Coding
Hipk3	72.5152	-0.28532	0.154132	-1.85114	0.0641494	0.474464	Coding
Btg1	5493.82	0.213574	0.115392	1.85086	0.0641895	0.474464	Coding
Hist1h1c	566.556	0.220942	0.119395	1.85052	0.0642391	0.474464	Coding
Gm16470	4.45821	1.12853	0.609959	1.85018	0.0642879	NA	Predicted
Slc25a10	37.3638	-0.433476	0.234312	-1.84999	0.0643145	NA	Coding
Dnajc30	85.9903	0.252008	0.136252	1.84957	0.064375	0.474997	Coding
Gm5483	1.51262	2.25186	1.21761	1.84941	0.0643991	NA	Predicted
Scrn2	40.3534	-0.353922	0.191386	-1.84926	0.0644205	NA	Coding
Neto2	9.15488	-0.758643	0.410278	-1.8491	0.064444	NA	Coding
Gm43415	1.7924	1.71155	0.925755	1.84882	0.0644844	NA	Predicted
D930030I03Rik	10.7447	0.672496	0.363833	1.84837	0.0645495	NA	Noncoding
Aldh16a1	54.6	-0.34789	0.188242	-1.8481	0.0645873	0.476091	Coding
Bclaf1	492.385	-0.121812	0.0659445	-1.84719	0.0647189	0.47659	Coding
Eif4e	556.447	-0.1273	0.0689536	-1.84617	0.0648679	0.477215	Coding
Fam160b2	42.6833	-0.348746	0.188952	-1.84568	0.0649386	NA	Coding
Sos1	48.8514	0.321589	0.174261	1.84545	0.064972	0.477509	Coding
Ndnf	26.6514	0.590921	0.320277	1.84503	0.0650328	NA	Coding
Arid4b	460.763	0.14153	0.07671	1.84501	0.0650365	0.477511	Coding
Gm11517	6.36481	0.877381	0.475623	1.8447	0.0650813	NA	Predicted
Ptpn12	90.5396	0.265644	0.144015	1.84456	0.0651015	0.477518	Coding
Cnnm1	2.47905	1.46481	0.794229	1.84432	0.0651371	NA	Coding
Smpd4	90.9143	-0.425131	0.230591	-1.84366	0.0652324	0.478007	Coding
Oser1	337.872	0.166094	0.0901426	1.84257	0.0653914	0.478446	Coding
Gm26545	6.46891	0.88879	0.482399	1.84244	0.0654111	NA	Predicted
Cxcr6	3643.7	0.396861	0.215408	1.84237	0.0654208	0.478446	Coding
E2f8	40.8654	-0.356901	0.193761	-1.84196	0.0654807	NA	Coding
Cxcl9	3.59755	1.54683	0.839857	1.84178	0.0655072	NA	Coding
Gm9104	2.77335	1.46712	0.79682	1.84122	0.0655888	NA	Predicted
Fbxo9	194.853	0.211223	0.114729	1.84106	0.065613	0.479381	Coding
Zbtb11os1	37.3623	0.362584	0.197	1.84052	0.0656912	NA	Noncoding
Cdk2ap2	927.668	0.185785	0.10095	1.84036	0.0657159	0.47942	Coding
Ly6a	2192.33	0.588587	0.31986	1.84014	0.0657472	0.47942	Coding
Clcn7	15.2983	-0.577576	0.31403	-1.83924	0.0658799	NA	Coding
Ankrd54	126.491	0.219929	0.119681	1.83763	0.0661176	0.48099	Coding
Ndufb11	1565.94	0.08299	0.0451689	1.83733	0.0661617	0.48099	Coding
Usp3	274.068	0.149096	0.0811605	1.83705	0.0662026	0.48099	Coding
Gm3081	19.0365	-0.486905	0.265149	-1.83635	0.0663065	NA	Predicted
Kpna3	171.703	-0.216748	0.118041	-1.83621	0.0663262	0.48099	Coding
Rps12-ps10	19.8009	0.482841	0.263029	1.8357	0.0664028	NA	Ribosomal
Gm7251	3.27997	1.26524	0.689314	1.8355	0.0664312	NA	Predicted
Map1a	4.7172	-1.05021	0.572186	-1.83544	0.066441	NA	Coding
Gm42508	3.56286	-1.272	0.693043	-1.83538	0.0664496	NA	Predicted
Pak6	10.555	0.690538	0.376255	1.83529	0.0664625	NA	Coding
Gm11713	120.088	0.283059	0.154252	1.83505	0.066499	0.48099	Predicted
Ankrd37	134.242	0.239125	0.130333	1.83472	0.0665473	0.48099	Coding
Naa15	353.588	-0.153989	0.0839318	-1.83469	0.066551	0.48099	Coding
Bend5	4.50006	-1.11665	0.608662	-1.8346	0.0665649	NA	Coding
Zfp874a	25.6542	0.437783	0.238658	1.83435	0.0666015	NA	Coding
Osbpl5	28.0142	0.423032	0.230671	1.83392	0.0666657	NA	Coding
Smim10l1	166.8	0.176541	0.0962694	1.83382	0.0666806	0.48099	Coding
Adap1	90.939	-0.303946	0.16576	-1.83365	0.0667062	0.48099	Coding
Kat2a	44.173	-0.361568	0.197192	-1.83358	0.0667157	NA	Coding
Gm26520	5.74967	-1.32231	0.721233	-1.8334	0.0667425	NA	Predicted
Usf3	91.4006	-0.273387	0.149125	-1.83327	0.0667624	0.48099	Coding
Gm12166	149.07	-0.190961	0.104172	-1.83314	0.0667819	0.48099	Predicted
Cd247	794.389	0.159293	0.0868997	1.83307	0.0667922	0.48099	Coding
Ttf2	49.3658	-0.327325	0.178573	-1.833	0.0668024	0.48099	Coding
Npas4	1.41137	2.16838	1.18335	1.8324	0.0668914	NA	Coding
Gm7516	6.22035	0.916054	0.49993	1.83236	0.0668972	NA	Predicted
Wdr91	22.7598	0.448718	0.244913	1.83215	0.0669286	NA	Coding
Hmgb2	5654.3	-0.138723	0.0757164	-1.83214	0.06693	0.481443	Coding
Ssr3	646.396	-0.118452	0.0646708	-1.83162	0.0670081	0.48154	Coding
9230110C19Rik	2.49823	1.43584	0.784046	1.83132	0.0670523	NA	Coding
Hhex	80.9288	-0.434481	0.2373	-1.83094	0.0671097	0.481805	Coding
Zfp449	1.56749	-1.92291	1.05031	-1.8308	0.0671301	NA	Coding
Gm26384	1.99237	-1.8623	1.01733	-1.83057	0.067164	NA	Predicted
Zfp947	2.21265	-1.6166	0.883719	-1.82932	0.0673524	NA	Coding
Slc25a17	209.971	-0.161825	0.0885035	-1.82846	0.0674808	0.483281	Coding
Ar	241.367	0.211235	0.115576	1.82767	0.0675986	0.483281	Coding
Def6	367.899	0.139845	0.0765383	1.82713	0.0676806	0.483281	Coding
Fam69a	68.6769	0.373836	0.204611	1.82705	0.0676916	0.483281	Coding
Lmln	4.73877	-1.15948	0.634655	-1.82695	0.0677074	NA	Coding
Fbxl18	18.5995	-0.56098	0.30706	-1.82694	0.067709	NA	Coding
Smdt1	1371.66	0.0840664	0.04604	1.82594	0.0678593	0.483281	Coding
Gm8185	3.9467	-1.1539	0.631953	-1.82592	0.0678617	NA	Predicted
Prdx6	1328.95	0.101129	0.0553969	1.82554	0.0679199	0.483281	Coding
Dnm2	275.864	0.159495	0.0873729	1.82545	0.0679334	0.483281	Coding
Coa3	436.024	0.124904	0.068426	1.82539	0.0679429	0.483281	Coding
CT030657.5	20.5974	0.468665	0.256769	1.82524	0.0679651	NA	Noncoding
Taf6	61.2756	-0.290867	0.159372	-1.82508	0.0679887	0.483281	Coding
Mphosph6	241.878	-0.191414	0.10489	-1.8249	0.0680166	0.483281	Coding
1810037I17Rik	2110.19	-0.0997754	0.0546785	-1.82477	0.0680365	0.483281	Coding
Fam122a	79.5834	0.240842	0.132027	1.82419	0.0681239	0.483281	Coding
P3h4	4.10768	1.09648	0.6011	1.82412	0.0681339	NA	Coding
Gm42636	6.50135	0.826945	0.453477	1.82357	0.0682177	NA	Predicted
Gzmk	226.638	0.719305	0.394529	1.8232	0.0682731	0.483281	Coding
Golga5	80.4736	0.259657	0.142426	1.8231	0.0682887	0.483281	Coding
Faap20	229.102	0.162088	0.0889081	1.8231	0.068289	0.483281	Coding
AC163038.3	6.88984	-0.832792	0.456876	-1.8228	0.0683342	NA	Noncoding
Gm8019	1.29312	2.05342	1.12668	1.82255	0.0683717	NA	Predicted
Unc93b1	58.671	0.306935	0.168411	1.82254	0.0683732	0.483417	Coding
Vbp1	489.826	-0.125384	0.0688345	-1.82153	0.0685261	0.484039	Coding
Ddx1	227.897	-0.203305	0.111667	-1.82063	0.0686628	0.484525	Coding
Cat	153.246	-0.202895	0.111467	-1.82022	0.0687251	0.484525	Coding
Gm43313	25.9674	0.423105	0.232725	1.81805	0.0690566	NA	Predicted
Ms4a6c	40.6466	0.406872	0.223807	1.81796	0.0690703	NA	Coding
Rcn2	123.564	-0.219927	0.120986	-1.81779	0.0690968	0.485045	Coding
Gpr171	538.699	0.24876	0.136873	1.81746	0.0691469	0.485045	Coding
Rpl22-ps1	17.1465	0.539644	0.296944	1.81733	0.0691669	NA	Ribosomal
Gdf11	54.5293	0.349282	0.192205	1.81724	0.0691803	0.485045	Coding
Cops3	196.954	-0.173819	0.095665	-1.81696	0.0692233	0.485045	Coding
Tap2	741.937	0.112455	0.0618958	1.81685	0.0692408	0.485045	Coding
Nfkbib	381.15	0.157458	0.0866892	1.81635	0.0693174	0.485045	Coding
Rad54l2	136.421	-0.206664	0.113798	-1.81606	0.0693614	0.485045	Coding
Gcat	47.5475	-0.401192	0.220915	-1.81604	0.0693635	0.485045	Coding
Imp3	479.303	0.122299	0.0673486	1.8159	0.0693852	0.485045	Coding
Dnajb5	17.5796	-0.538974	0.296936	-1.81512	0.0695054	NA	Coding
C2cd4b	21.8966	-1.81752	1.00138	-1.81501	0.0695222	NA	Coding
Cd52	21147.2	0.158134	0.0871344	1.81482	0.0695511	0.485748	Coding
Gm38077	9.19963	0.696016	0.38364	1.81424	0.0696403	NA	Predicted
Ttn	3.74254	-1.64347	0.905937	-1.81411	0.0696611	NA	Coding
2010107E04Rik	2201.45	0.0955334	0.0526738	1.81368	0.0697269	0.48652	Coding
Pacs1	92.4386	0.243662	0.13438	1.81323	0.0697965	0.48655	Coding
Parpbp	30.2184	-0.527861	0.291326	-1.81193	0.0699978	NA	Coding
Trim37	47.5188	-0.353776	0.19525	-1.81192	0.0699992	NA	Coding
AC129022.1	15.1341	0.54571	0.301195	1.81182	0.070014	NA	Noncoding
Ube3c	74.2764	-0.25607	0.14136	-1.81147	0.0700684	0.487559	Coding
Gpr132	234.148	0.352664	0.194721	1.81112	0.0701215	0.487559	Coding
Pxylp1	29.5353	0.407055	0.224779	1.81091	0.0701541	NA	Coding
Slc46a3	15.0395	0.528561	0.291914	1.81068	0.070191	NA	Coding
Cbfb	455.097	-0.13996	0.0772971	-1.81067	0.0701919	0.487559	Coding
Reep5	2602.16	0.129202	0.0713672	1.81038	0.0702364	0.487559	Coding
Gm37033	440.892	0.246872	0.13638	1.81017	0.0702687	0.487559	Predicted
AF529169	13.4619	0.702128	0.387946	1.80986	0.0703176	NA	Coding
H13	482.555	0.146812	0.0811297	1.80959	0.0703589	0.48773	Coding
Rabl3	30.8567	-0.398066	0.220009	-1.80932	0.070402	NA	Coding
Mansc1	10.8245	0.665012	0.367776	1.8082	0.0705756	NA	Coding
1700028E10Rik	8.83176	0.800192	0.442574	1.80804	0.0705998	NA	Noncoding
Mbnl2	260.471	0.162088	0.0896506	1.808	0.0706072	0.488996	Coding
Pbk	96.663	-0.277217	0.153444	-1.80663	0.07082	0.490014	Coding
Gm44835	23.2195	0.501548	0.277778	1.80557	0.0709856	NA	Predicted
Enoph1	58.5352	-0.290362	0.160832	-1.80537	0.0710164	0.490917	Coding
Calm2	2068.68	-0.0862698	0.047808	-1.80451	0.0711519	0.491397	Coding
Ttk	44.708	-0.374153	0.207367	-1.8043	0.0711841	NA	Coding
Smpdl3a	310.272	0.190485	0.105587	1.80405	0.0712238	0.491438	Coding
Rpl38-ps1	9.31035	-0.80145	0.444352	-1.80364	0.0712883	NA	Ribosomal
Gtse1	25.9485	-0.475805	0.263853	-1.8033	0.0713419	NA	Coding
Cxcr2	5.86865	-1.2052	0.668388	-1.80315	0.0713651	NA	Coding
Birc6	468.638	-0.126196	0.0699894	-1.80307	0.071377	0.492039	Coding
Ppp1r9b	97.1397	0.283874	0.157563	1.80166	0.0715995	0.493116	Coding
Zfp707	44.7125	0.340146	0.188871	1.80094	0.0717123	NA	Coding
Zfp644	166.644	-0.18534	0.102927	-1.8007	0.0717508	0.493574	Coding
Zfp747	14.5443	0.541134	0.300665	1.79979	0.0718941	NA	Coding
AC154828.1	7.45714	0.792417	0.44034	1.79956	0.0719303	NA	Noncoding
Gm44768	1.92409	-1.72691	0.959682	-1.79946	0.0719466	NA	Predicted
Fkbp8	1041	0.124357	0.0691102	1.7994	0.0719557	0.493574	Coding
Map2k3	491.262	0.215278	0.119646	1.79929	0.0719734	0.493574	Coding
Nacc1	108.667	-0.238244	0.132421	-1.79914	0.0719968	0.493574	Coding
Jdp2	157.242	-0.313432	0.174273	-1.79851	0.0720956	0.493574	Coding
Hopx	857.427	0.29144	0.16205	1.79846	0.0721046	0.493574	Coding
Ccdc117	86.7367	0.254335	0.141431	1.7983	0.0721301	0.493574	Coding
Trav7-3	30.4431	-1.09595	0.609568	-1.79792	0.0721897	NA	Coding
Dag1	21.5737	-0.48149	0.267807	-1.7979	0.072193	NA	Coding
Mrps23	343.562	0.132003	0.073429	1.7977	0.0722241	0.493764	Coding
Hcst	3068.11	0.211125	0.117525	1.79642	0.0724271	0.493874	Coding
Med14	179.389	-0.204864	0.114059	-1.79613	0.0724746	0.493874	Coding
Xpo5	19.2926	-0.530934	0.295668	-1.79571	0.0725406	NA	Coding
Gm8292	60.7761	0.319149	0.17774	1.79559	0.072559	0.493874	Predicted
D030056L22Rik	161.651	0.196556	0.109469	1.79555	0.0725661	0.493874	Coding
Samd9l	302.907	0.257835	0.1436	1.79551	0.0725719	0.493874	Coding
AC173482.2	15.0233	0.605105	0.337132	1.79486	0.0726762	NA	Noncoding
Gm26873	5.32118	0.904383	0.503959	1.79456	0.0727246	NA	Predicted
Toporsos	169.243	0.217862	0.121412	1.7944	0.0727489	0.494593	Coding
Rpl19-ps11	320.054	-0.149718	0.0834539	-1.79402	0.0728105	0.494593	Ribosomal
Trav5-4	2.03637	-2.37981	1.32706	-1.7933	0.0729256	NA	Coding
Gm12508	26.9907	0.482527	0.269104	1.79309	0.0729587	NA	Predicted
Ankrd39	134.086	-0.202403	0.11288	-1.79307	0.072961	0.494805	Coding
Gstp-ps	52.1067	0.297801	0.166092	1.79299	0.0729745	0.494805	Noncoding
Gm9703	7.19021	0.885928	0.49414	1.79287	0.072994	NA	Predicted
Cuta	681.377	0.12687	0.0707845	1.79235	0.0730777	0.495053	Coding
Tgm2	2.55337	1.62286	0.905705	1.79182	0.0731619	NA	Coding
Gm22435	17.6039	0.531075	0.296432	1.79156	0.0732038	NA	Predicted
Fam60a	196.494	-0.164417	0.0918332	-1.79039	0.0733915	0.495389	Coding
Cdkal1	79.9548	0.243862	0.136214	1.79029	0.0734074	0.495389	Coding
Gm11483	5.33179	0.945099	0.527933	1.79019	0.0734241	NA	Predicted
Numa1	235.754	-0.159818	0.0892758	-1.79016	0.073428	0.495389	Coding
Taf6l	521.468	0.13327	0.0744475	1.79013	0.0734336	0.495389	Coding
Mest	10.1919	-0.805937	0.450234	-1.79004	0.0734472	NA	Coding
Ercc1	179.02	0.200375	0.111944	1.78996	0.07346	0.495389	Coding
Gsap	62.1265	0.28059	0.156798	1.7895	0.0735342	0.495441	Coding
Sectm1a	10.1798	-0.911716	0.509533	-1.78932	0.0735638	NA	Coding
Epcam	7.06034	0.874464	0.488769	1.78912	0.0735962	NA	Coding
E130102H24Rik	9.70373	0.814454	0.455295	1.78885	0.0736391	NA	Noncoding
Lrp12	2.46944	-1.74919	0.978072	-1.78841	0.0737101	NA	Coding
Cisd3	174.793	-0.181436	0.101465	-1.78816	0.0737496	0.496442	Coding
Spint1	28.1712	-0.469073	0.262367	-1.78785	0.0738006	NA	Coding
Bcl2a1b	2204.45	0.161384	0.0902754	1.78769	0.0738264	0.496511	Coding
Chd7	478.468	0.13482	0.0754379	1.78717	0.0739108	0.49663	Coding
Ptpn2	329.062	0.159355	0.0892063	1.78636	0.0740409	0.496791	Coding
Fbxw7	131.728	0.239956	0.13434	1.78619	0.0740682	0.496791	Coding
Cdc42bpb	2.2344	-1.5987	0.895046	-1.78617	0.0740717	NA	Coding
Sub1	6251.31	0.144931	0.0811733	1.78545	0.0741888	0.497152	Coding
Gm29562	2.74629	1.54848	0.867609	1.78476	0.0742998	NA	Predicted
Pim2	4.71543	0.942276	0.528125	1.78419	0.0743928	NA	Coding
1110008P14Rik	507.138	0.132214	0.0741143	1.78392	0.074436	0.49836	Coding
Cep162	50.8435	-0.348543	0.195596	-1.78195	0.0747567	0.499442	Coding
Ramp1	386.055	-0.216395	0.121448	-1.78178	0.0747843	0.499442	Coding
BC048403	9.5593	-0.706834	0.396718	-1.7817	0.074798	NA	Coding
Fam72a	18.4983	-0.506425	0.28426	-1.78156	0.0748215	NA	Coding
Pcnp	555.843	-0.112867	0.0633548	-1.7815	0.0748304	0.499442	Coding
Nmi	415.185	0.131352	0.0737398	1.78128	0.074866	0.499442	Coding
Farp2	14.8111	0.549032	0.308282	1.78094	0.0749222	NA	Coding
Ttll3	25.6213	0.41511	0.233192	1.78012	0.0750566	NA	Coding
Fth1	10882.7	0.116284	0.0653396	1.77969	0.0751272	0.500736	Coding
Agrn	5.26738	1.01917	0.572787	1.77932	0.0751873	NA	Coding
Mier3	38.3522	0.344499	0.193682	1.77868	0.0752922	NA	Coding
AC140449.1	1.26346	2.15038	1.20911	1.77848	0.0753247	NA	Noncoding
Enkd1	30.9447	-0.386397	0.217437	-1.77705	0.07556	NA	Coding
Prpf40a	855.95	-0.0950987	0.0535276	-1.77663	0.0756293	0.503452	Coding
Ptpn6	748.679	-0.294116	0.165576	-1.77632	0.0756802	0.503452	Coding
Fam105a	334.901	0.167164	0.0941309	1.77586	0.0757555	0.503452	Coding
Cherp	61.7909	-0.276279	0.155601	-1.77556	0.0758052	0.503452	Coding
Klf6	1730.99	0.206304	0.116275	1.77427	0.076018	0.503708	Coding
Txnip	693.893	0.230597	0.12998	1.7741	0.0760465	0.503708	Coding
Dgkz	363.796	-0.131483	0.0741126	-1.7741	0.0760467	0.503708	Coding
Agps	136.13	-0.186125	0.104948	-1.77349	0.0761473	0.503847	Coding
Trav12-3	16.0168	-1.93038	1.08851	-1.77342	0.0761598	NA	Coding
Dcun1d3	47.3167	0.305529	0.172288	1.77337	0.0761675	NA	Coding
Mrpl45	141.081	-0.229385	0.129366	-1.77315	0.0762031	0.503847	Coding
Cyth3	44.4492	-0.506677	0.285876	-1.77237	0.0763335	NA	Coding
Bcl9l	72.3139	0.268769	0.151683	1.77191	0.0764092	0.504356	Coding
Arhgap26	67.5785	0.438121	0.247264	1.77187	0.0764155	0.504356	Coding
Gm38020	12.5618	0.644773	0.363966	1.77152	0.076474	NA	Predicted
Stard5	38.3347	0.360841	0.20372	1.77126	0.0765182	NA	Coding
Mtmr9	41.7823	0.343909	0.194244	1.7705	0.0766441	NA	Coding
Gm7353	1.22739	2.07805	1.1748	1.76885	0.0769184	NA	Predicted
Snrpc	606.112	-0.110821	0.0626833	-1.76795	0.0770686	0.508216	Coding
Calca	34.3852	1.64474	0.930711	1.76718	0.0771974	NA	Coding
Gm23412	4.5723	0.971681	0.549924	1.76694	0.0772389	NA	Predicted
Tmem106c	63.852	-0.287849	0.162924	-1.76677	0.0772674	0.509031	Coding
Gm26532	132.114	0.278907	0.157896	1.76639	0.0773306	0.509031	Predicted
Fau	32004.6	0.0948892	0.0537314	1.76599	0.0773973	0.509031	Coding
H2-Q10	52.6435	0.346752	0.196421	1.76535	0.077505	0.509289	Coding
Gm14966	10.0266	0.639222	0.362204	1.76481	0.0775954	NA	Predicted
Cryab	11.6667	-1.15983	0.657326	-1.76447	0.077653	NA	Coding
Gm37198	19.2977	0.50192	0.284475	1.76437	0.0776691	NA	Predicted
Xrcc6	84.79	-0.235036	0.133282	-1.76345	0.0778244	0.510527	Coding
Slfn8	171.506	0.276404	0.156758	1.76326	0.0778569	0.510527	Coding
Sema3a	2.01022	1.53049	0.868178	1.76287	0.0779217	NA	Coding
Snrpd2	1468.29	-0.0860767	0.0488363	-1.76255	0.0779756	0.510527	Coding
Ncbp2	271.721	-0.154993	0.08795	-1.76228	0.0780213	0.510527	Coding
Gm37728	72.8594	0.458153	0.25999	1.7622	0.0780362	0.510527	Predicted
Kcnf1	12.8874	-0.944052	0.535739	-1.76215	0.078044	NA	Coding
AL591207.3	1.7909	-1.95112	1.10752	-1.7617	0.0781207	NA	Noncoding
Gm4987	5.03807	-1.13938	0.646884	-1.76133	0.0781818	NA	Predicted
Serinc1	373.544	0.141175	0.0801555	1.76126	0.0781937	0.511108	Coding
Gys1	14.8798	0.531206	0.30161	1.76123	0.0781991	NA	Coding
Gm1673	17.8781	-0.57061	0.324096	-1.76062	0.0783024	NA	Predicted
Heca	232.178	0.154896	0.087985	1.76048	0.0783261	0.511226	Coding
Gm37589	86.4895	0.269416	0.153053	1.76028	0.0783609	0.511226	Predicted
Nfkbid	151.128	0.358714	0.203822	1.75994	0.0784177	0.511226	Coding
Usp28	8.2844	0.832648	0.473227	1.75951	0.0784909	NA	Coding
S100a11-ps	2.35897	1.53759	0.87394	1.75938	0.0785134	NA	Noncoding
Gm45201	18.4046	-0.515169	0.292826	-1.7593	0.0785264	NA	Predicted
Tmem241	23.8771	0.44736	0.25436	1.75876	0.0786177	NA	Coding
Gabbr1	124.209	0.197386	0.112289	1.75784	0.0787745	0.513102	Coding
Vps29	816.332	-0.0955151	0.054375	-1.7566	0.0789862	0.513732	Coding
Kars	222.289	-0.164344	0.0935843	-1.75611	0.0790705	0.513732	Coding
Cyth4	316.829	-0.158323	0.0901581	-1.75606	0.0790781	0.513732	Coding
Zbed3	35.5271	-0.40465	0.230468	-1.75578	0.0791267	NA	Coding
Gm5853	2.17997	-1.65241	0.941714	-1.75468	0.0793133	NA	Predicted
Atp5d	2875.22	0.0895471	0.0510422	1.75437	0.0793666	0.515113	Coding
Enc1	19.8221	0.504338	0.287491	1.75427	0.0793839	NA	Coding
Pde4d	308.252	0.217045	0.123763	1.75372	0.0794786	0.515113	Coding
Art2a-ps	6.37086	1.33657	0.762235	1.75349	0.0795174	NA	Coding
Smyd2	86.0428	-0.297608	0.169768	-1.75303	0.0795963	0.515113	Coding
Klra3	101.512	-1.09666	0.625654	-1.75282	0.0796325	0.515113	Coding
Ndufs3	457.951	0.133054	0.0759097	1.7528	0.0796367	0.515113	Coding
Gm43460	11.9021	0.614414	0.350651	1.75221	0.079738	NA	Predicted
Gm11742	2.67858	-1.34224	0.766242	-1.75172	0.0798227	NA	Predicted
Nomo1	83.416	-0.266303	0.152031	-1.75164	0.0798362	0.515955	Coding
Bcl2a1d	1588.25	0.190611	0.108882	1.75062	0.0800117	0.516641	Coding
Fgr	9.65646	0.82397	0.470776	1.75024	0.0800774	NA	Coding
Zfand5	378.15	0.143625	0.0821197	1.74898	0.0802952	0.517504	Coding
Slc3a2	1300.73	0.160718	0.0919065	1.74871	0.0803411	0.517504	Coding
Ciapin1	646.635	-0.170548	0.09755	-1.74832	0.0804091	0.517504	Coding
Gm14286	7.68005	0.801468	0.458441	1.74825	0.0804211	NA	Predicted
Ripk1	130.401	0.2032	0.116232	1.74824	0.0804233	0.517504	Coding
E430024P14Rik	6.81016	-0.813808	0.465714	-1.74744	0.0805603	NA	Noncoding
Ifitm10	160.069	0.30492	0.174578	1.74662	0.080704	0.518644	Coding
Prim2	79.2644	-0.289594	0.165852	-1.7461	0.080794	0.518644	Coding
Cep250	123.23	-0.218554	0.125174	-1.74601	0.0808096	0.518644	Coding
Usp34	392.27	-0.122091	0.0699558	-1.74526	0.0809394	0.51903	Coding
Gm14541	5.98065	0.920877	0.527687	1.74512	0.0809639	NA	Predicted
Ctc1	36.7466	-0.342949	0.196526	-1.74506	0.0809746	NA	Coding
AC124446.1	2.67253	-1.42719	0.817962	-1.74481	0.0810186	NA	Noncoding
AC125206.3	29.3761	0.426179	0.244259	1.74478	0.0810226	NA	Noncoding
Gm43331	31.1437	0.399695	0.229157	1.7442	0.0811244	NA	Predicted
Zmym3	64.1533	-0.284527	0.16317	-1.74375	0.0812034	0.520275	Coding
Gm17214	2.16097	1.58164	0.907833	1.74222	0.0814706	NA	Predicted
C430049B03Rik	1.15469	-2.0664	1.18617	-1.74207	0.081496	NA	Noncoding
Rad50	229.704	-0.162426	0.0932457	-1.74192	0.0815228	0.521612	Coding
Trappc6a	459.763	-0.162334	0.0932016	-1.74175	0.0815522	0.521612	Coding
Myl12b	2914.24	0.102926	0.0591139	1.74115	0.0816565	0.521831	Coding
Anapc13	380.483	-0.130277	0.0748724	-1.73999	0.0818605	0.522482	Coding
Fignl1	82.7723	-0.258844	0.14878	-1.73977	0.0818988	0.522482	Coding
Acadl	669.92	-0.110277	0.0634064	-1.73922	0.0819968	0.522659	Coding
Gm12216	40.2089	0.347351	0.199781	1.73866	0.0820943	NA	Predicted
Arhgap21	27.8664	-0.393961	0.22674	-1.7375	0.0822988	NA	Coding
Igfbp7	310.814	-0.607797	0.349852	-1.7373	0.0823349	0.524365	Coding
Rpl7-ps7	668.07	0.122348	0.0704414	1.73688	0.0824083	0.524385	Ribosomal
Gm11633	3.38883	1.09624	0.631274	1.73655	0.0824667	NA	Predicted
4930532G15Rik	16.7707	-0.524117	0.30182	-1.73652	0.0824716	NA	Noncoding
Pmpcb	175.286	-0.192515	0.110866	-1.73646	0.0824819	0.524404	Coding
Trav14d-3-dv8	4.60796	1.12615	0.648874	1.73554	0.0826455	NA	Coding
Xylt1	15.7384	0.652423	0.375933	1.73548	0.0826567	NA	Coding
Tgfb1i1	1.32312	-2.09229	1.20639	-1.73434	0.0828577	NA	Coding
Sephs1	135.569	-0.210018	0.121265	-1.7319	0.083292	0.528786	Coding
Gimap8	383.322	0.159341	0.0920303	1.7314	0.0833807	0.528786	Coding
Eef1e1	383.186	-0.146921	0.0848746	-1.73103	0.0834461	0.528786	Coding
Abhd2	189.779	-0.160046	0.0924596	-1.73098	0.0834552	0.528786	Coding
Gm8054	13.1835	0.575503	0.332614	1.73024	0.0835871	NA	Predicted
Wwtr1	1.93896	2.14766	1.24134	1.7301	0.0836118	NA	Coding
Gm37387	98.3133	0.283361	0.163812	1.72979	0.0836669	0.529677	Predicted
Foxp4	83.5741	-0.238728	0.138089	-1.72879	0.0838465	0.530363	Coding
Cdk11b	374.159	0.131169	0.0758914	1.72838	0.0839205	0.53038	Coding
Susd2	1.34263	-2.14592	1.24201	-1.72778	0.0840275	NA	Coding
Hist1h1a	35.0967	-0.366165	0.212022	-1.72702	0.0841648	NA	Coding
Gcnt2	1.97232	1.51757	0.878842	1.72678	0.0842066	NA	Coding
Gm10382	4.51275	-1.02552	0.593961	-1.72657	0.0842445	NA	Predicted
Rxra	12.4959	0.758823	0.439514	1.7265	0.084257	NA	Coding
Slc38a1	389.745	-0.140337	0.0813143	-1.72586	0.0843735	0.532123	Coding
Gm45221	126.146	0.200738	0.116339	1.72546	0.0844446	0.532123	Predicted
Myo1g	303.948	0.149148	0.0864411	1.72543	0.0844495	0.532123	Coding
Zfp51	57.8994	0.278617	0.161493	1.72525	0.0844821	0.532123	Coding
Sbno2	42.0423	0.3215	0.186409	1.72471	0.0845801	NA	Coding
Gm40309	112.687	0.218793	0.126893	1.72423	0.084666	0.532209	Predicted
Rbx1-ps	18.1945	0.48647	0.282176	1.724	0.0847084	NA	Noncoding
Arl14ep	270.356	-0.245758	0.142566	-1.72382	0.0847407	0.532209	Coding
Gm14403	3.35174	-1.3577	0.787636	-1.72377	0.0847502	NA	Predicted
Anp32a	1409.32	-0.155316	0.0901263	-1.72331	0.0848322	0.532209	Coding
Rps6kb2	71.0923	0.25306	0.146856	1.72318	0.0848551	0.532209	Ribosomal
Cd84	457.318	0.212792	0.12351	1.72287	0.0849121	0.532209	Coding
Sbf2	1.6442	-1.85073	1.07424	-1.72283	0.0849201	NA	Coding
Slc4a7	190.367	0.193198	0.112163	1.72248	0.0849822	0.532209	Coding
Gm12481	29.155	0.424579	0.246528	1.72223	0.0850272	NA	Predicted
Hdgf	973.248	-0.1077	0.0625514	-1.72178	0.0851098	0.532209	Coding
Sra1	736.549	0.106105	0.0616302	1.72165	0.0851335	0.532209	Coding
Btg3	268.472	0.187305	0.108796	1.72162	0.0851392	0.532209	Coding
Alg8	25.8124	-0.436675	0.253699	-1.72123	0.0852087	NA	Coding
Gm5453	53.718	0.331598	0.192697	1.72083	0.0852813	0.532643	Predicted
Sde2	213.376	0.182363	0.106024	1.72001	0.0854306	0.532643	Coding
Metap1	166.509	-0.176025	0.102345	-1.71992	0.0854477	0.532643	Coding
Rpa2	468.558	-0.174603	0.101534	-1.71966	0.0854947	0.532643	Coding
Stat1	1077.49	0.155574	0.0905407	1.71828	0.0857454	0.533448	Coding
Bzw2	299.052	0.292501	0.170277	1.7178	0.0858336	0.533448	Coding
Cish	404.114	-0.163893	0.0954255	-1.7175	0.0858886	0.533448	Coding
Nudt22	75.9527	-0.245857	0.143164	-1.71731	0.0859224	0.533448	Coding
Nek7	462.402	-0.216362	0.126013	-1.71698	0.0859821	0.533448	Coding
Mfap1a	53.3509	0.289342	0.168569	1.71646	0.0860788	0.533474	Coding
Sass6	54.5909	-0.305812	0.178305	-1.71511	0.0863249	0.533474	Coding
Lemd2	112.772	0.193683	0.112937	1.71496	0.0863525	0.533474	Coding
1810062G17Rik	5.24832	-0.989088	0.576764	-1.71489	0.0863647	NA	Coding
9930111J21Rik2	486.598	0.203133	0.118456	1.71483	0.0863756	0.533474	Coding
Nsun5	33.5998	-0.358148	0.208863	-1.71475	0.0863916	NA	Coding
Svip	4.52609	-1.0652	0.621215	-1.7147	0.0863997	NA	Coding
Gmfg	2400.07	0.154352	0.090022	1.71461	0.0864171	0.533474	Coding
Tm2d1	250.929	0.140563	0.0820084	1.71401	0.0865266	0.533474	Coding
AC159190.1	1.29051	-2.08995	1.21942	-1.71389	0.0865493	NA	Noncoding
Cep76	30.6875	0.378648	0.220969	1.71358	0.0866063	NA	Coding
Banf1	863.901	-0.108587	0.0633775	-1.71334	0.0866508	0.533474	Coding
Rasgef1b	47.6061	-0.32036	0.18706	-1.7126	0.0867858	0.533474	Coding
Timm10	157.179	0.176186	0.102899	1.71223	0.0868546	0.533474	Coding
Zfp367	81.8965	-0.290525	0.169692	-1.71207	0.0868836	0.533474	Coding
Sft2d2	136.814	-0.228189	0.133285	-1.71204	0.0868892	0.533474	Coding
Ei24	259.139	0.151903	0.0887716	1.71117	0.0870497	0.533474	Coding
Rpl10-ps2	3.21529	1.32427	0.773968	1.71102	0.0870783	NA	Ribosomal
Clic1	4668.69	0.0783158	0.0457717	1.71101	0.0870793	0.533474	Coding
Osr2	5.39948	-1.04638	0.611786	-1.71037	0.0871975	NA	Coding
Gm45833	4.42009	-1.34228	0.78479	-1.71037	0.0871981	NA	Predicted
Ssrp1	792.148	-0.144322	0.0844005	-1.70997	0.0872719	0.533474	Coding
Washc1	140.859	0.183425	0.107318	1.70917	0.0874203	0.533474	Coding
Ube2t	124.056	-0.196146	0.114762	-1.70915	0.087423	0.533474	Coding
Brip1	51.1516	-0.351177	0.205496	-1.70893	0.0874646	0.533474	Coding
Prkd2	97.3966	0.262574	0.153663	1.70876	0.0874948	0.533474	Coding
Ahr	153.829	-0.224516	0.131393	-1.70874	0.0874987	0.533474	Coding
Cdc42se2	288.135	0.135244	0.0791513	1.70868	0.0875111	0.533474	Coding
Xpo6	113.066	-0.202988	0.118808	-1.70853	0.0875377	0.533474	Coding
Arpc4	1304.42	-0.0986593	0.0577497	-1.7084	0.0875628	0.533474	Coding
n-TSaga9	0.830346	-2.32723	1.36247	-1.7081	0.0876186	NA	Noncoding
Myo16	7.17988	-0.852166	0.499019	-1.70768	0.0876954	NA	Coding
Trav7d-4	2.97004	1.74288	1.02069	1.70755	0.08772	NA	Coding
Trav7-1	18.7346	2.66319	1.56085	1.70624	0.0879638	NA	Coding
Mylpf	36.9578	-0.362599	0.212518	-1.7062	0.08797	NA	Coding
Lrrc57	71.3176	0.271884	0.159357	1.70614	0.0879823	0.534981	Coding
Babam1	221.919	0.162783	0.0954192	1.70598	0.088012	0.534981	Coding
Gm26616	6.27922	0.786579	0.461162	1.70565	0.0880737	NA	Predicted
Uqcc3	433.796	0.128211	0.0751754	1.7055	0.0881019	0.534981	Coding
Scaf4	79.7862	0.238132	0.139654	1.70516	0.0881651	0.534981	Coding
Slc5a3	276.279	-0.243929	0.143056	-1.70513	0.0881695	0.534981	Coding
Gm45809	3.77805	-1.12781	0.661433	-1.7051	0.0881756	NA	Predicted
Trip4	119.349	0.204187	0.119854	1.70363	0.0884498	0.535575	Coding
Abtb1	75.0297	0.231807	0.136142	1.70269	0.0886266	0.535575	Coding
Zfp598	101.461	-0.229016	0.134503	-1.70268	0.0886271	0.535575	Coding
Ifi203	1148.23	0.230747	0.135529	1.70257	0.0886491	0.535575	Coding
Amz2	75.7654	0.253729	0.149055	1.70225	0.0887087	0.535575	Coding
mt-Atp8	396.289	-0.123905	0.0727898	-1.70224	0.0887108	0.535575	Mitochondrial
Tsc22d4	833.406	0.112667	0.0662099	1.70166	0.0888183	0.535575	Coding
Dnajc27	9.75592	-0.775291	0.455652	-1.7015	0.0888495	NA	Coding
Lima1	1.78485	-1.69152	0.994155	-1.70146	0.0888565	NA	Coding
Gm5735	1.76155	1.71388	1.00753	1.70107	0.0889293	NA	Predicted
Commd4	411.638	0.117542	0.0691013	1.70101	0.0889413	0.535575	Coding
Cnot6	328.251	-0.132157	0.0777013	-1.70083	0.0889742	0.535575	Coding
Thap3	127.729	0.234905	0.13815	1.70036	0.0890627	0.535575	Coding
Ccne2	35.3066	-0.376379	0.2214	-1.7	0.0891311	NA	Coding
Svbp	490.297	0.129559	0.076218	1.69984	0.0891604	0.535575	Coding
Pcgf2	31.5142	-0.354806	0.208744	-1.69972	0.0891833	NA	Coding
Gm37390	113.71	0.28252	0.166219	1.69969	0.0891893	0.535575	Predicted
Plaur	4.49308	1.20081	0.706516	1.69962	0.0892024	NA	Coding
Casp3	906.067	-0.150779	0.0887135	-1.69962	0.0892025	0.535575	Coding
Ddx58	128.437	0.238473	0.140364	1.69896	0.089327	0.53589	Coding
Gm15234	2.39397	-1.46044	0.859783	-1.69861	0.0893924	NA	Predicted
Gm43627	1.91152	1.55767	0.917076	1.69851	0.0894107	NA	Predicted
Msl2	157.438	-0.168972	0.0994986	-1.69824	0.0894627	0.536086	Coding
Laptm5	4158.82	0.145729	0.0858409	1.69767	0.0895703	0.536086	Coding
Abcf2	155.995	-0.183313	0.108002	-1.69731	0.0896376	0.536086	Coding
Tbc1d10c	648.95	0.135885	0.0800622	1.69724	0.0896519	0.536086	Coding
Snrnp40	431.224	-0.11993	0.0706771	-1.69688	0.0897197	0.536086	Coding
Wdr24	24.3175	-0.414763	0.244431	-1.69685	0.0897245	NA	Coding
Gm26530	0.813568	-2.30841	1.36093	-1.6962	0.0898483	NA	Predicted
Gm13786	2.33535	-1.38464	0.816476	-1.69587	0.0899101	NA	Predicted
C230062I16Rik	2.51156	1.32161	0.779318	1.69586	0.0899124	NA	Noncoding
BC052040	25.4697	0.392981	0.23176	1.69564	0.0899539	NA	Coding
Ccnd3	591.695	0.142756	0.0842158	1.69512	0.0900535	0.537649	Coding
Tars	140.098	-0.219572	0.129568	-1.69464	0.090143	0.537752	Coding
Rwdd2a	9.00508	0.714057	0.421502	1.69408	0.0902507	NA	Coding
Mxd4	327.166	0.156846	0.0926572	1.69276	0.0905017	0.539035	Coding
Psph	363.234	-0.137972	0.0815073	-1.69275	0.0905028	0.539035	Coding
0610009L18Rik	20.8673	0.470176	0.277901	1.69188	0.090668	NA	Noncoding
Gm13340	62.2185	0.286202	0.169187	1.69163	0.0907165	0.539071	Predicted
Fbxo18	56.0269	-0.270492	0.159934	-1.69128	0.0907839	0.539071	Coding
Tnip3	116.029	0.407917	0.241313	1.69041	0.0909501	0.539071	Coding
Ints6	146.592	-0.176621	0.104496	-1.69022	0.0909866	0.539071	Coding
Bscl2	342.561	0.194743	0.115218	1.69022	0.0909867	0.539071	Coding
Nsd3	804.658	0.118292	0.0699892	1.69014	0.0910007	0.539071	Coding
Sco1	28.8734	-0.431774	0.255518	-1.6898	0.0910662	NA	Coding
Zmiz1	300.817	-0.179589	0.106298	-1.68949	0.0911259	0.539071	Coding
Ndel1	254.253	0.150259	0.088941	1.68942	0.0911392	0.539071	Coding
Setx	286.962	-0.13354	0.0790628	-1.68904	0.0912113	0.539071	Coding
Marveld2	7.79614	-0.740792	0.438636	-1.68885	0.0912479	NA	Coding
Wdr4	53.6639	-0.314825	0.186436	-1.68865	0.0912871	0.539071	Coding
Gusb	75.4508	-0.263924	0.156351	-1.68802	0.0914065	0.539071	Coding
Galns	62.9614	0.265805	0.157481	1.68786	0.0914386	0.539071	Coding
Mxi1	296.613	0.286236	0.169591	1.6878	0.0914503	0.539071	Coding
Pla1a	16.3741	-0.624261	0.370029	-1.68706	0.0915919	NA	Coding
1700084C06Rik	1.6411	1.64472	0.975	1.6869	0.0916234	NA	Noncoding
Ints14	86.4076	0.22199	0.131603	1.68681	0.0916391	0.539072	Coding
Smpdl3b	102.339	-0.328193	0.19457	-1.68676	0.0916493	0.539072	Coding
Pstpip1	646.69	0.135133	0.0801194	1.68664	0.0916727	0.539072	Coding
Esco1	214.317	0.155964	0.0924894	1.68629	0.09174	0.539072	Coding
Ccsap	110.12	-0.193956	0.115053	-1.6858	0.091835	0.539205	Coding
Ift57	46.1912	-0.339131	0.201179	-1.68571	0.0918509	NA	Coding
Rpsa-ps4	8.56524	0.669031	0.39694	1.68547	0.0918974	NA	Noncoding
Arl3	212.232	-0.15921	0.0944916	-1.68491	0.0920059	0.539476	Coding
Prr13	1294.85	0.15068	0.0894381	1.68474	0.0920385	0.539476	Coding
2810408A11Rik	4.69794	1.00307	0.595474	1.68448	0.0920882	NA	Coding
Selenop	41.2269	0.367869	0.218431	1.68414	0.092154	NA	Coding
Tgfb1	901.904	-0.144106	0.085569	-1.68409	0.0921641	0.539476	Coding
Atr	55.0727	-0.276484	0.164178	-1.68405	0.092171	0.539476	Coding
Gm16120	1.54071	-2.13207	1.26626	-1.68376	0.0922288	NA	Predicted
Idh3a	482.976	-0.13134	0.0780304	-1.68319	0.0923392	0.540036	Coding
Tchp	26.5493	-0.399145	0.237142	-1.68314	0.0923471	NA	Coding
Slc11a1	4.57032	-1.03115	0.612644	-1.68312	0.0923514	NA	Coding
Gm8880	6.76899	0.768225	0.456614	1.68244	0.0924835	NA	Predicted
Ppp1r35	222.251	-0.152265	0.0905051	-1.68239	0.0924937	0.540514	Coding
Ppia	17840.7	-0.0696196	0.0414023	-1.68154	0.0926579	0.540554	Coding
Cfap36	245.885	-0.1422	0.0845727	-1.6814	0.0926855	0.540554	Coding
Gm20443	5.9615	-0.832143	0.494946	-1.68128	0.0927085	NA	Predicted
Mettl16	138.618	-0.187727	0.11166	-1.68123	0.0927183	0.540554	Coding
Hrh2	11.0962	0.609578	0.362634	1.68097	0.092768	NA	Coding
Lockd	228.823	-0.266461	0.15853	-1.68082	0.0927971	0.540591	Noncoding
Ddx43	24.9507	-0.456034	0.271328	-1.68075	0.0928121	NA	Coding
Grap	498.388	0.225146	0.133984	1.68039	0.0928811	0.540657	Coding
Eps8l3	5.19281	1.12573	0.670044	1.68009	0.0929405	NA	Coding
Bcap31	851.293	0.102116	0.060805	1.6794	0.0930751	0.541216	Coding
Cep152	27.16	-0.397958	0.236993	-1.6792	0.0931135	NA	Coding
Nrbf2	199.318	0.177297	0.105587	1.67915	0.0931227	0.541216	Coding
Slc35f6	44.8937	0.337738	0.201186	1.67873	0.0932038	NA	Coding
5031425E22Rik	245.455	0.165748	0.0987484	1.67848	0.0932526	0.541549	Noncoding
Hacd1	1.70158	-1.65143	0.983953	-1.67837	0.0932755	NA	Coding
Sestd1	15.293	-0.545763	0.325195	-1.67826	0.0932955	NA	Coding
2310010J17Rik	61.9162	0.290701	0.173302	1.67742	0.0934596	0.541978	Noncoding
Cd53	2653.4	0.145462	0.0867209	1.67736	0.0934721	0.541978	Coding
4930452B06Rik	1.50625	-1.93577	1.1545	-1.67671	0.0935984	NA	Coding
AC130217.1	2.35396	1.38852	0.828136	1.67668	0.0936048	NA	Noncoding
Gm36638	2.04698	1.45295	0.866709	1.67639	0.0936612	NA	Predicted
Calcb	11.9768	-1.62135	0.967186	-1.67636	0.0936682	NA	Coding
4930403D09Rik	2.21043	1.46426	0.873616	1.67609	0.0937205	NA	Noncoding
Ppp1r3f	4.42241	0.935808	0.558442	1.67575	0.0937877	NA	Coding
Mrpl21	475.246	0.104369	0.0622851	1.67567	0.0938025	0.543226	Coding
Gnas	4009.87	0.0670959	0.0400449	1.67551	0.0938333	0.543226	Coding
Dyrk3	11.7299	0.686711	0.409864	1.67546	0.0938444	NA	Coding
Arl4c	407.403	0.300767	0.179587	1.67477	0.0939797	0.54329	Coding
Ipo8	94.0038	-0.229578	0.137093	-1.67462	0.094009	0.54329	Coding
Ptpre	122.191	0.305194	0.182277	1.67434	0.0940633	0.54329	Coding
Guf1	52.297	-0.288831	0.172604	-1.67337	0.0942545	0.543972	Coding
Acadvl	178.165	0.166094	0.0992824	1.67295	0.0943377	0.544031	Coding
Angpt2	7.7317	-0.722573	0.431967	-1.67275	0.0943767	NA	Coding
Metap1d	30.7578	-0.373715	0.223432	-1.67261	0.0944034	NA	Coding
Rab3ip	83.4209	-0.269097	0.160907	-1.67238	0.0944503	0.544259	Coding
Gm16153	2.11991	1.54873	0.926258	1.67203	0.094519	NA	Predicted
Colgalt1	114.64	-0.231095	0.138227	-1.67184	0.0945549	0.544289	Coding
Xaf1	263.738	0.257377	0.15397	1.67161	0.0946018	0.544289	Coding
Kdelc1	14.3167	-0.529951	0.317236	-1.67053	0.0948153	NA	Coding
Rttn	26.032	-0.420224	0.251615	-1.67011	0.0948982	NA	Coding
Zfp566	13.1693	0.546935	0.32763	1.66937	0.0950444	NA	Coding
Nfyb	353.92	-0.128828	0.0771802	-1.66918	0.0950817	0.54584	Coding
Gm12568	17.1847	0.492255	0.294972	1.66882	0.0951535	NA	Predicted
Zfp760	39.3662	0.326329	0.19555	1.66878	0.0951614	NA	Coding
Gm37352	70.1854	0.276248	0.165593	1.66824	0.0952681	0.54584	Predicted
Zranb3	14.6757	-0.545482	0.326993	-1.66818	0.0952807	NA	Coding
Gm14044	45.7734	-0.311159	0.186537	-1.66809	0.0952985	NA	Predicted
Chaf1a	94.8899	-0.24513	0.146963	-1.66797	0.0953209	0.54584	Coding
Tmem71	324.342	0.156571	0.0938736	1.6679	0.0953363	0.54584	Coding
Rps15	15090.4	-0.0675445	0.0404988	-1.66781	0.0953525	0.54584	Ribosomal
Rap2c	171.477	0.191993	0.115119	1.66779	0.0953579	0.54584	Coding
Usp48	187.227	0.179712	0.107815	1.66686	0.0955429	0.54584	Coding
AI506816	63.7331	0.306649	0.184027	1.66633	0.095648	0.54584	Noncoding
Ric1	92.1411	0.221372	0.132853	1.66629	0.095656	0.54584	Coding
Tfdp2	87.7547	-0.29482	0.176949	-1.66613	0.0956875	0.54584	Coding
Acly	253.077	-0.148219	0.088961	-1.66612	0.0956902	0.54584	Coding
Tlr12	4.89274	1.09461	0.657081	1.66587	0.0957385	NA	Coding
Golgb1	214.733	0.156004	0.0936502	1.66581	0.0957511	0.54584	Coding
1110035H17Rik	16.5857	-0.495797	0.297672	-1.66558	0.095797	NA	Noncoding
Leng1	93.2432	0.223957	0.134508	1.66501	0.0959111	0.546334	Coding
Ciart	8.98153	0.654803	0.393364	1.66462	0.0959877	NA	Coding
Gsdmd	188.544	0.157892	0.0948698	1.6643	0.0960531	0.546598	Coding
Amz1	7.47138	-0.751011	0.451329	-1.664	0.096113	NA	Coding
Cuedc2	354.213	-0.154993	0.0931702	-1.66355	0.0962031	0.546598	Coding
Trim34a	10.0383	0.669801	0.402636	1.66354	0.0962047	NA	Coding
Gigyf2	102.732	-0.241615	0.145253	-1.66341	0.0962303	0.546598	Coding
Gm43809	1.52891	1.78037	1.0706	1.66296	0.0963198	NA	Predicted
Tmem256	825.856	-0.12744	0.0766346	-1.66295	0.0963222	0.546598	Coding
Rpl39-ps	770.701	-0.124682	0.0749766	-1.66294	0.0963245	0.546598	Ribosomal
Dcun1d4	16.2759	0.498908	0.300053	1.66273	0.0963659	NA	Coding
Gm17745	245.835	-0.261334	0.157189	-1.66255	0.0964034	0.546628	Predicted
Zfp995	27.2705	0.367868	0.221422	1.66139	0.0966356	NA	Coding
Dync2li1	1.40606	1.97754	1.1906	1.66096	0.0967218	NA	Coding
Zcchc11	552.343	0.176351	0.106182	1.66083	0.0967472	0.547182	Coding
Prpf38b	678.045	-0.111	0.0668374	-1.66074	0.0967657	0.547182	Coding
Cables2	62.8738	-0.263809	0.158864	-1.6606	0.0967935	0.547182	Coding
Zfp36l2	1271.42	0.272973	0.164383	1.66059	0.096795	0.547182	Coding
Ccdc163	31.4389	-0.368068	0.221816	-1.65934	0.0970468	NA	Coding
Endog	60.9872	0.319645	0.19267	1.65903	0.0971097	0.548086	Coding
Isoc1	54.2304	-0.321563	0.19385	-1.65882	0.0971518	0.548086	Coding
Ctrl	1.10432	-1.99358	1.20192	-1.65866	0.0971846	NA	Coding
Gm43413	32.2254	-0.422995	0.255047	-1.6585	0.0972173	NA	Predicted
Add1	284.071	-0.153059	0.0922891	-1.65847	0.0972225	0.548086	Coding
Tyk2	76.358	-0.264422	0.159471	-1.65811	0.0972947	0.548086	Coding
Tstd3	216.48	-0.222139	0.133983	-1.65797	0.0973231	0.548086	Coding
Ticrr	20.1932	-0.490538	0.295879	-1.6579	0.0973384	NA	Coding
Pwwp2a	95.3349	0.210537	0.127062	1.65697	0.0975264	0.548501	Coding
Mrpl44	118.222	-0.203969	0.123104	-1.65688	0.0975441	0.548501	Coding
Rab4a	85.7086	0.253062	0.152776	1.65643	0.0976352	0.548579	Coding
Synpo	23.6834	-0.540861	0.326622	-1.65592	0.0977372	NA	Coding
Rpl3-ps1	622.483	-0.1193	0.0720558	-1.65566	0.0977906	0.548579	Ribosomal
Hat1	372.753	-0.1566	0.0945862	-1.65563	0.0977972	0.548579	Coding
Bbs10	2.94369	-1.21032	0.731077	-1.65553	0.0978171	NA	Coding
Cxcr3	272.734	0.645958	0.390276	1.65513	0.097898	0.548579	Coding
Npm3	830.53	-0.123874	0.0748485	-1.65499	0.0979263	0.548579	Coding
Nck2	23.9568	0.479003	0.289475	1.65473	0.0979799	NA	Coding
Exosc9	148.877	-0.176003	0.106385	-1.6544	0.0980463	0.548838	Coding
Otud1	21.5971	0.482388	0.291628	1.65412	0.0981029	NA	Coding
Pkn2	280.577	0.137219	0.082988	1.65348	0.0982332	0.549199	Coding
Gm20091	34.8246	-0.399312	0.241528	-1.65328	0.0982746	NA	Predicted
Poc1a	45.6146	-0.336553	0.203636	-1.65272	0.0983881	NA	Coding
Kmt5a	301.093	-0.143297	0.0867079	-1.65264	0.0984033	0.549199	Coding
Ugt1a5	2.63551	-1.40108	0.847844	-1.65252	0.0984282	NA	Coding
Gm9320	53.8789	0.301841	0.182664	1.65244	0.0984442	0.549199	Predicted
Fgf23	2.99309	-1.23411	0.746865	-1.65238	0.0984567	NA	Coding
Rpp25l	222.552	0.146337	0.088593	1.65179	0.0985775	0.549199	Coding
Cks1brt	6.48544	-0.838046	0.507363	-1.65177	0.0985816	NA	Coding
Acp5	189.484	0.236365	0.14312	1.65152	0.098632	0.549199	Coding
Kctd20	86.1401	-0.226906	0.137397	-1.65146	0.0986437	0.549199	Coding
Atp2a3	149.336	0.191642	0.116045	1.65144	0.0986478	0.549199	Coding
Lmna	189.844	0.325444	0.197097	1.65118	0.0987009	0.549199	Coding
Nedd4	163.61	-0.265399	0.160785	-1.65065	0.0988102	0.549397	Coding
Eif2ak3	65.7904	0.272372	0.165045	1.65029	0.0988841	0.549397	Coding
Ipo7	208.584	-0.157505	0.0954698	-1.64978	0.0989872	0.54956	Coding
Gm42729	8.03278	0.677614	0.410832	1.64937	0.0990716	NA	Predicted
Ctps	121.207	-0.232215	0.140813	-1.6491	0.0991269	0.549925	Coding
Hist1h2bm	34.4346	-0.394864	0.239455	-1.64901	0.0991455	NA	Coding
AW112010	19257	0.220232	0.133584	1.64863	0.0992229	0.54998	Noncoding
Eif3d	780.418	-0.111357	0.0675574	-1.64833	0.0992845	0.54998	Coding
Ttc3	251.643	-0.191106	0.11597	-1.64789	0.0993757	0.550076	Coding
Cflar	323.688	0.188902	0.114693	1.64703	0.0995525	0.550427	Coding
[truncated: 13,625 more rows]

## Sheet: Combo vs aTGFb
	baseMean	log2FoldChange	lfcSE	stat	pvalue	padj	type
Rps10-ps1	491.266	-0.687198	0.0676312	-10.161	2.96141e-24	2.88768e-20	Ribosomal
Gm10076	1679.07	0.506735	0.0509006	9.95539	2.38884e-23	1.16468e-19	Predicted
Rpl39-ps	767.591	-0.466321	0.0656675	-7.10125	1.23634e-12	4.01853e-09	Ribosomal
Rpsa-ps10	301.21	-0.589585	0.0902847	-6.53029	6.56412e-11	1.60017e-07	Noncoding
Gm4332	1046.19	-0.438346	0.0681054	-6.43629	1.22431e-10	2.38765e-07	Predicted
Gm7536	1464.1	-0.323129	0.0515798	-6.26463	3.73706e-10	5.20573e-07	Predicted
Gm9843	1282.96	-0.38869	0.0618448	-6.28493	3.27992e-10	5.20573e-07	Predicted
Rps26-ps1	521.954	-0.395274	0.063742	-6.20115	5.60508e-10	5.46551e-07	Ribosomal
Wdr89	850.641	-0.415015	0.066884	-6.20499	5.46992e-10	5.46551e-07	Coding
Gm3788	73.1797	-0.961022	0.154766	-6.20951	5.31489e-10	5.46551e-07	Predicted
Rps27rt	1516.91	-0.295818	0.0483787	-6.11464	9.67736e-10	8.57854e-07	Ribosomal
Rps24-ps3	293.084	-0.613619	0.103118	-5.95064	2.67088e-09	2.15053e-06	Ribosomal
Rpl34-ps1	672.956	-0.396902	0.0668293	-5.93903	2.86707e-09	2.15053e-06	Ribosomal
Rps10-ps2	1027.01	-0.294917	0.0511937	-5.7608	8.3715e-09	5.83075e-06	Ribosomal
Rpl37rt	699.887	-0.355574	0.0619945	-5.73557	9.71854e-09	6.3177e-06	Ribosomal
Rps25-ps1	100.481	-0.767924	0.136991	-5.60564	2.07486e-08	1.2645e-05	Ribosomal
Rpl19-ps11	310.08	-0.427247	0.0769018	-5.55574	2.76432e-08	1.58558e-05	Ribosomal
Phlda3	23.0083	1.77567	0.328534	5.40484	6.48649e-08	3.51387e-05	Coding
Gm14303	432.591	-0.375309	0.0717424	-5.23134	1.68282e-07	8.63642e-05	Predicted
Gm13436	200.37	-0.475215	0.0912884	-5.20565	1.93316e-07	9.42512e-05	Predicted
Gm5805	71.4343	-0.750358	0.14733	-5.09306	3.52324e-07	0.000163596	Predicted
S1pr4	213.41	0.65631	0.130497	5.02932	4.92227e-07	0.000218169	Coding
Gm10275	178.548	-0.483294	0.0964251	-5.01212	5.38339e-07	0.000218723	Predicted
Gm11478	924.179	-0.389105	0.0775299	-5.01877	5.20033e-07	0.000218723	Predicted
Uba52	1770.9	0.293364	0.0597831	4.90714	9.24123e-07	0.000360445	Coding
Gm10263	30.7831	-1.08933	0.230568	-4.72456	2.30613e-06	0.000864887	Predicted
Rpl9-ps6	137.365	-0.54087	0.116555	-4.64046	3.47629e-06	0.00125545	Ribosomal
mt-Rnr1	4211.53	0.303844	0.0661429	4.59375	4.35343e-06	0.00151608	Mitochondrial
Gm5963	51.6709	-0.781479	0.171014	-4.56968	4.88465e-06	0.00164242	Predicted
Rps15a-ps7	205.782	-0.419252	0.0932691	-4.49508	6.95422e-06	0.00226035	Ribosomal
Gm10029	119.882	-0.500145	0.112015	-4.46497	8.00809e-06	0.00251893	Predicted
Gm2000	155.219	-0.460227	0.103659	-4.4398	9.00406e-06	0.00272029	Predicted
Gm10224	75.9288	-0.623926	0.140886	-4.42859	9.48517e-06	0.00272029	Predicted
Lime1	1932.77	0.36127	0.081546	4.43026	9.41206e-06	0.00272029	Coding
Gm10288	636.524	-0.270373	0.0611905	-4.41854	9.93695e-06	0.00276844	Predicted
Gm7600	62.4393	-0.709573	0.161035	-4.40633	1.05137e-05	0.00284775	Predicted
AC121801.1	106.168	0.737268	0.1677	4.39635	1.10085e-05	0.00290119	Noncoding
Ifng	4848.73	1.0329	0.235727	4.38176	1.17724e-05	0.00302086	Coding
Lilr4b	83.5117	0.862733	0.197967	4.35797	1.31273e-05	0.00327899	Coding
Gm12254	699.721	-0.284456	0.0653525	-4.35264	1.34509e-05	0.00327899	Predicted
Gm6394	66.4992	-0.701278	0.162016	-4.32844	1.50171e-05	0.0035715	Predicted
Gm10073	349.86	-0.391448	0.0908828	-4.30718	1.65351e-05	0.0038389	Predicted
Igtp	600.01	0.563032	0.132364	4.25368	2.1029e-05	0.0047687	Coding
Hacd2	313.517	-0.476397	0.113277	-4.2056	2.6039e-05	0.0057706	Coding
Gzme	1261.63	0.552923	0.132021	4.18815	2.81235e-05	0.00609406	Coding
Gm37248	223.333	0.646453	0.15505	4.16931	3.05523e-05	0.00647642	Predicted
AC110377.1	28.6939	-0.9821	0.236179	-4.15828	3.20647e-05	0.0066524	Noncoding
Ddit3	195.168	0.479603	0.115527	4.15144	3.30392e-05	0.00671178	Coding
Gzmd	2563.22	0.54845	0.133543	4.10691	4.0098e-05	0.00797951	Coding
Bach1	45.9777	0.8148	0.198911	4.09631	4.19791e-05	0.00818676	Coding
mt-Rnr2	28260.2	0.290098	0.0711363	4.07806	4.54126e-05	0.00836345	Mitochondrial
Rplp0-ps1	270.74	0.361605	0.0885206	4.08498	4.40809e-05	0.00836345	Ribosomal
Gm10689	88.441	-0.57088	0.139996	-4.07783	4.54582e-05	0.00836345	Predicted
Rpl41	33641.9	-0.146265	0.0360009	-4.06281	4.84859e-05	0.0087553	Ribosomal
Rpl28-ps1	203.404	-0.489871	0.120724	-4.05777	4.95442e-05	0.00878373	Ribosomal
Rpl23a	5703.5	-0.183061	0.0452408	-4.04638	5.20166e-05	0.00905739	Ribosomal
Gm14586	156.18	-0.413328	0.102694	-4.02484	5.70137e-05	0.00975334	Predicted
Gm4968	41.997	-0.808265	0.201801	-4.00525	6.1952e-05	0.0102389	Predicted
Gm5905	286.564	-0.319968	0.0798156	-4.00884	6.1017e-05	0.0102389	Predicted
Ypel2	31.5037	-0.845457	0.212121	-3.98572	6.72756e-05	0.0109334	Coding
Rpl3-ps1	582.174	-0.306517	0.0770745	-3.97689	6.98221e-05	0.0111612	Ribosomal
Ccr2	374.677	1.73124	0.437094	3.96079	7.47011e-05	0.0117486	Coding
Nt5e	106.178	-0.852194	0.215701	-3.95082	7.78841e-05	0.0120547	Coding
Slamf7	191.297	0.837852	0.214558	3.90502	9.42191e-05	0.0143552	Coding
AC151846.1	54.1261	-0.662482	0.170406	-3.88767	0.00010121	0.015183	Noncoding
Adamts6	95.7153	-0.572065	0.14834	-3.85644	0.000115049	0.0169976	Coding
Dpysl2	347.613	-0.330537	0.0859274	-3.8467	0.00011972	0.0174238	Coding
Gm6341	47.0186	-0.704784	0.184187	-3.82645	0.000130003	0.0186421	Predicted
Gm5075	26.4114	-1.02922	0.271014	-3.79767	0.000146064	0.0197334	Predicted
Stk17b	1782.45	0.264672	0.069745	3.79485	0.000147733	0.0197334	Coding
Rps13-ps2	333.93	-0.334981	0.0882087	-3.7976	0.000146105	0.0197334	Ribosomal
Armc7	156.011	0.499148	0.13128	3.80215	0.000143445	0.0197334	Coding
Ccr5	566.356	0.69562	0.18312	3.7987	0.000145455	0.0197334	Coding
Gm12013	823.846	-0.238493	0.0629225	-3.79026	0.00015049	0.0198301	Predicted
Anxa1	212.161	0.711941	0.190222	3.74269	0.000182059	0.0236701	Coding
Rps28	9248.88	-0.179911	0.0481742	-3.73459	0.000188018	0.02381	Ribosomal
Rpl38-ps2	125.13	-0.501624	0.134218	-3.73738	0.000185945	0.02381	Ribosomal
Tpt1-ps3	926.189	0.263798	0.0708924	3.7211	0.000198357	0.0247972	Noncoding
Rpsa-ps2	40.3039	-0.856276	0.230527	-3.71442	0.000203668	0.0251388	Noncoding
1110032F04Rik	43.9159	-0.748928	0.20244	-3.6995	0.000216029	0.0258477	Coding
Rpl21-ps10	40.0081	-0.711394	0.192376	-3.69793	0.000217364	0.0258477	Ribosomal
H2-Q10	40.8902	0.797403	0.215353	3.70277	0.000213254	0.0258477	Coding
Fam178b	21.4138	-1.46895	0.399451	-3.67742	0.000235603	0.0276791	Coding
Spry1	257.058	-0.544155	0.148846	-3.65582	0.000256365	0.0294381	Coding
Creb3l2	95.2619	-0.742978	0.203413	-3.65257	0.000259633	0.0294381	Coding
Rpl23a-ps3	55.1333	-0.66381	0.18168	-3.65373	0.000258462	0.0294381	Ribosomal
1700019D03Rik	35.7554	-1.20427	0.330811	-3.64035	0.000272272	0.0305164	Coding
Rps3a2	1158.55	0.205105	0.056483	3.63126	0.00028204	0.0312519	Ribosomal
Gm42921	24.5726	-1.07397	0.297176	-3.61392	0.000301606	0.0323182	Predicted
Adam17	204.639	0.397346	0.109888	3.61591	0.000299299	0.0323182	Coding
D1Ertd622e	38.7472	0.818324	0.226334	3.61555	0.000299706	0.0323182	Coding
Hist1h2ap	557.231	0.485958	0.134611	3.61009	0.000306088	0.032442	Coding
Gm7429	51.0947	-0.602789	0.167689	-3.59469	0.000324781	0.0340531	Predicted
Il12rb1	72.4328	0.630083	0.175465	3.59093	0.000329497	0.03418	Coding
Rps15a-ps8	41.6072	-0.677885	0.188961	-3.58743	0.000333948	0.0342771	Ribosomal
Zfand5	312.706	0.318173	0.0889206	3.57817	0.000346005	0.0351448	Coding
Gm4604	206.32	-0.346198	0.0968394	-3.57497	0.000350272	0.0352113	Predicted
Gm43712	171.875	-0.374556	0.105202	-3.56034	0.000370376	0.0361718	Predicted
Gm12933	37.4874	-0.744736	0.2092	-3.55993	0.000370955	0.0361718	Predicted
H2afj	1408.38	0.196403	0.0551667	3.56017	0.000370614	0.0361718	Coding
Rpl30	7296.17	-0.162606	0.0457847	-3.55153	0.000383	0.0369766	Ribosomal
Rprd2	124.505	0.39165	0.110668	3.53895	0.00040172	0.0384037	Coding
Gm10012	46.3571	-0.670315	0.190027	-3.52748	0.000419538	0.0397177	Predicted
Themis	278.966	0.443938	0.126081	3.52104	0.000429854	0.0403029	Coding
Cst7	1638.97	-0.421391	0.120113	-3.50827	0.00045103	0.0415371	Coding
Gm9844	347.701	-0.341002	0.0972076	-3.50797	0.000451537	0.0415371	Predicted
Gm28438	1167.67	0.238685	0.0681075	3.50452	0.000457424	0.0416855	Predicted
Gpcpd1	105.463	0.558302	0.159993	3.48954	0.000483851	0.0436854	Coding
Cd2	1548.9	0.569895	0.163636	3.4827	0.000496378	0.0444053	Coding
Hbegf	34.9806	-1.03404	0.297162	-3.47973	0.00050192	0.0444929	Coding
Ccm2	146.886	0.406281	0.116915	3.47502	0.000510806	0.0448727	Coding
Rps3a3	95.2701	-0.538935	0.155398	-3.4681	0.000524159	0.0456346	Ribosomal
Inpp4b	968.958	-0.367633	0.106301	-3.45841	0.000543372	0.0468718	Coding
Slc4a7	153.488	0.422128	0.122222	3.45378	0.000552791	0.0468718	Coding
Gm10247	52.4781	-0.595873	0.172443	-3.45547	0.000549339	0.0468718	Predicted
Gzma	1754.37	1.62557	0.473975	3.42965	0.000604356	0.0508023	Coding
Gm4149	290.195	-0.286839	0.0838777	-3.41973	0.000626839	0.051703	Predicted
Frat2	54.6591	0.952222	0.278684	3.41685	0.00063351	0.051703	Coding
Ly6c1	862.907	1.15244	0.337398	3.41566	0.000636279	0.051703	Coding
Sytl1	74.4022	0.512265	0.149776	3.42021	0.000625717	0.051703	Coding
Gm10443	112.061	-0.402584	0.118045	-3.41043	0.000648596	0.0518398	Predicted
Msi2	465.84	-0.369929	0.108426	-3.41182	0.000645306	0.0518398	Coding
Gbp7	676.09	0.271812	0.0798158	3.40549	0.000660445	0.0519355	Coding
Ifngr1	1476.04	0.366614	0.107626	3.40638	0.000658305	0.0519355	Coding
Gimap6	886.989	0.403337	0.118702	3.3979	0.000679043	0.052304	Coding
Dhx34	51.9525	0.987861	0.290802	3.39703	0.000681223	0.052304	Coding
Nrgn	2143.01	-0.508894	0.14967	-3.40012	0.000673568	0.052304	Coding
Nfat5	282.035	-0.461802	0.13604	-3.39461	0.000687258	0.0523551	Coding
Rps15-ps2	44.8807	-0.606646	0.179118	-3.38684	0.000707018	0.0534429	Ribosomal
Gm45715	21.5715	0.978018	0.289158	3.3823	0.000718816	0.0539167	Predicted
Gm7290	33.1368	-0.752639	0.223696	-3.36456	0.000766663	0.0566343	Predicted
Neat1	646.385	0.253131	0.0752315	3.3647	0.000766282	0.0566343	Noncoding
H2-Q4	891.74	0.20946	0.0624476	3.35417	0.000796038	0.0583622	Coding
Fam174b	38.6013	-0.71894	0.214719	-3.34829	0.000813113	0.0587449	Coding
Gm14044	45.5977	-0.650052	0.194148	-3.34823	0.000813307	0.0587449	Predicted
Ddx60	58.3121	0.78684	0.235654	3.33896	0.000840939	0.0597907	Coding
Ccl3	7901.17	1.07707	0.322745	3.33723	0.000846182	0.0597907	Coding
Lat	1300.97	0.250186	0.074889	3.34076	0.000835507	0.0597907	Coding
Rpl18-ps2	512.111	-0.227919	0.0684303	-3.33067	0.000866357	0.0605645	Ribosomal
Bmpr2	68.2347	-0.622395	0.186925	-3.32965	0.000869555	0.0605645	Coding
Nr4a3	292.403	0.510291	0.153948	3.3147	0.000917408	0.0634443	Coding
Ccl4	14663.9	0.905599	0.273378	3.31263	0.000924242	0.0634668	Coding
Arl5c	56.2914	1.04389	0.315404	3.30971	0.000933918	0.0636828	Coding
Gm7866	62.5174	-0.577331	0.174846	-3.30194	0.000960198	0.0650201	Predicted
Gm38358	24.0791	-0.819579	0.249376	-3.28652	0.00101435	0.0680152	Predicted
Pcnp	504.853	-0.220574	0.0671378	-3.2854	0.00101838	0.0680152	Coding
AC171206.4	35.8897	-0.736939	0.225236	-3.27185	0.00106844	0.0708735	Noncoding
mt-Nd1	8449.4	0.148606	0.0455327	3.26372	0.0010996	0.0715851	Mitochondrial
Rpl36a-ps2	272.25	-0.31365	0.0961142	-3.26331	0.0011012	0.0715851	Ribosomal
Dnajc15	712.508	0.415256	0.127169	3.26539	0.00109315	0.0715851	Coding
Irgm1	208.594	0.462166	0.141827	3.25865	0.00111943	0.0718131	Coding
Twsg1	172.426	-0.460593	0.141264	-3.26051	0.0011121	0.0718131	Coding
AC159815.1	138.089	-0.383057	0.118064	-3.24449	0.0011766	0.0745001	Noncoding
Bdh2	172.876	-1.30646	0.402593	-3.24512	0.00117402	0.0745001	Coding
Zbp1	603.986	0.445115	0.137298	3.24197	0.00118706	0.0746777	Coding
AC132304.1	48.9972	-0.626603	0.19353	-3.23776	0.00120473	0.0753034	Noncoding
Gimap4	1580.29	0.272347	0.0842752	3.23163	0.00123085	0.0754846	Coding
Rpl39	26174.7	-0.153122	0.0473629	-3.23294	0.00122522	0.0754846	Ribosomal
Rpl35a-ps5	27.9074	-0.752251	0.232557	-3.2347	0.00121771	0.0754846	Ribosomal
Esm1	36.8584	1.25936	0.390555	3.22453	0.0012618	0.076899	Coding
Nr4a2	1326.91	-0.289251	0.0898404	-3.21961	0.00128364	0.0777438	Coding
Gm10177	210.787	-0.305179	0.0949983	-3.21246	0.00131602	0.0783257	Predicted
Rps26	18557.3	-0.147602	0.0459174	-3.2145	0.0013067	0.0783257	Ribosomal
Gm42418	5852.96	0.436621	0.135958	3.21144	0.00132072	0.0783257	Predicted
Fam162a	1004.54	-0.310337	0.0966653	-3.21043	0.00132538	0.0783257	Coding
Lgals1	12361.3	0.169968	0.053098	3.20103	0.00136936	0.0804376	Coding
Serpinb1a	37.4621	1.02197	0.319647	3.19718	0.0013878	0.080598	Coding
Gm10155	50.4878	-0.546236	0.170859	-3.19701	0.00138862	0.080598	Predicted
Il3ra	94.2262	-0.494625	0.15507	-3.18968	0.00142429	0.0821788	Coding
Rps16-ps2	614.597	-0.189955	0.059699	-3.18188	0.00146321	0.0839277	Ribosomal
Rpl32-ps	21.1294	-0.893086	0.281161	-3.17642	0.00149106	0.0850253	Ribosomal
Tap1	920.793	0.184364	0.0580748	3.1746	0.00150044	0.0850629	Coding
Gm8292	71.8325	-0.517678	0.16319	-3.17224	0.00151266	0.0852598	Predicted
Il17ra	97.743	0.485804	0.153304	3.1689	0.00153015	0.08575	Coding
Rpl21-ps12	53.8202	-0.547889	0.173085	-3.16544	0.00154851	0.0862831	Ribosomal
Gm28555	40.6883	-0.601541	0.190175	-3.16309	0.00156102	0.0864856	Predicted
Gm10269	56.7701	-0.543915	0.172523	-3.15272	0.00161757	0.0891126	Predicted
Rpl10a-ps1	558.601	-0.258849	0.0823117	-3.14474	0.00166237	0.0910635	Ribosomal
7330423F06Rik	82.1972	0.633921	0.201697	3.14294	0.00167261	0.0910635	Noncoding
Kif13b	98.4507	-0.424821	0.13523	-3.14147	0.001681	0.0910635	Coding
Ly6c2	1435.7	1.09006	0.347246	3.13917	0.0016943	0.0912767	Coding
Arl4d	113.543	-0.553688	0.177181	-3.12498	0.00177815	0.0952679	Coding
Tmem230	167.221	-0.317959	0.101843	-3.12206	0.0017959	0.095693	Coding
Ifi206	51.3655	0.9171	0.294684	3.11215	0.00185733	0.097408	Coding
Gm14165	91.7838	-0.415764	0.133575	-3.11258	0.00185462	0.097408	Predicted
Gm15682	21.2041	-0.954709	0.30678	-3.11203	0.00185806	0.097408	Predicted
Dusp16	90.838	-0.565599	0.181907	-3.10927	0.00187551	0.0977974	Coding
Fbxo33	99.3033	0.393244	0.126583	3.10662	0.00189242	0.0981542	Coding
Wisp1	141.813	-0.586571	0.188957	-3.10426	0.00190754	0.0984147	Coding
Cytip	1417.2	0.224549	0.0726554	3.0906	0.00199754	0.101882	Coding
Samhd1	516.787	0.563592	0.182614	3.08625	0.00202697	0.101882	Coding
Batf	259.779	0.450417	0.145941	3.08629	0.00202671	0.101882	Coding
Slco3a1	108.142	0.75355	0.244027	3.08798	0.00201522	0.101882	Coding
Rps11-ps1	335.551	-0.245609	0.0794314	-3.09209	0.00198754	0.101882	Ribosomal
Gm4742	35.4179	0.624086	0.202677	3.07921	0.00207549	0.103785	Predicted
2020-09-07	1652.39	-0.185262	0.0602186	-3.07649	0.0020945	0.104201	Coding
AC120406.1	172.195	-0.303666	0.0987904	-3.07384	0.00211324	0.1046	Noncoding
Slc9b2	50.5235	-0.869083	0.283559	-3.06491	0.00217733	0.107228	Coding
Gbp3	222.072	0.40622	0.132714	3.06086	0.00220705	0.108145	Coding
Gm8995	1625.44	0.257131	0.0841087	3.05713	0.00223469	0.108644	Predicted
Dkkl1	89.7853	0.484513	0.15852	3.05648	0.00223951	0.108644	Coding
Il27ra	286.972	-0.254421	0.0836259	-3.04238	0.00234719	0.113304	Coding
Irf9	197.302	0.300772	0.09892	3.04056	0.00236138	0.113427	Coding
Oas1a	32.1629	0.775542	0.255287	3.03792	0.00238218	0.113866	Coding
Il10ra	118.884	0.575407	0.189804	3.03158	0.00243277	0.115717	Coding
Sipa1l1	143.742	0.391545	0.129297	3.02827	0.00245958	0.116114	Coding
Rpl13-ps6	32.56	-0.694357	0.229342	-3.02761	0.00246494	0.116114	Ribosomal
Fam105a	282.196	0.27878	0.0921603	3.02495	0.00248675	0.116578	Coding
Tnfsf4	24.2523	0.981965	0.325522	3.01659	0.00255636	0.119268	Coding
C920009B18Rik	71.6112	0.672464	0.223141	3.01363	0.00258144	0.119865	Noncoding
Abcb1a	83.7485	0.573419	0.190395	3.01174	0.00259758	0.120043	Coding
Cdc42ep3	161.891	0.325685	0.108218	3.00954	0.00261646	0.120345	Coding
Gtf2b	273.615	0.283337	0.0945213	2.9976	0.00272115	0.122321	Coding
Cep162	49.8618	-0.613289	0.204697	-2.99609	0.00273469	0.122321	Coding
Chchd10	294.118	0.390871	0.130334	2.999	0.00270866	0.122321	Coding
Rwdd1	1204.01	-0.16278	0.0542496	-3.00057	0.00269475	0.122321	Coding
Arhgap26	54.642	0.701122	0.234011	2.9961	0.00273457	0.122321	Coding
Atg101	168.715	0.309169	0.103035	3.00061	0.00269441	0.122321	Coding
Sqstm1	343.955	0.310635	0.103832	2.99171	0.00277423	0.123523	Coding
Gm12466	33.7297	-0.698439	0.233827	-2.98699	0.00281741	0.124875	Predicted
AY036118	618.717	0.422833	0.141645	2.98516	0.00283426	0.125053	Noncoding
Camk2n1	66.0636	0.843096	0.283616	2.97267	0.00295226	0.12931	Coding
Tpst2	304.781	0.378899	0.127483	2.97215	0.00295724	0.12931	Coding
Bcor	98.6907	-0.409317	0.137878	-2.96869	0.00299074	0.130191	Coding
Lncpint	77.1187	0.585015	0.197621	2.96029	0.0030735	0.133199	Noncoding
Gm9794	1290.57	-0.176391	0.0597014	-2.95455	0.00313123	0.1351	Predicted
Endod1	214.998	-0.408314	0.138277	-2.95288	0.00314829	0.135238	Coding
Ifi208	94.6518	0.579209	0.196473	2.94803	0.00319806	0.136773	Coding
Lclat1	73.7211	-0.570003	0.193516	-2.94551	0.00322421	0.137289	Coding
Irs2	97.2449	-0.541928	0.184316	-2.94022	0.00327983	0.13905	Coding
Dok2	885.343	0.321704	0.109689	2.93288	0.00335838	0.141764	Coding
Selenow	2120.97	0.221406	0.0756631	2.9262	0.00343125	0.144216	Coding
Rpl30-ps1	22.8587	-0.732799	0.251516	-2.91353	0.00357364	0.14462	Ribosomal
Igflr1	17.6523	-0.983821	0.33768	-2.91347	0.00357436	0.14462	Coding
Gm36931	27.6553	0.841628	0.288046	2.92185	0.00347955	0.14462	Predicted
4930520O04Rik	32.9185	-0.737605	0.253166	-2.91352	0.00357374	0.14462	Noncoding
Cdkn1a	150.052	1.16406	0.398601	2.92036	0.00349629	0.14462	Coding
B930036N10Rik	71.501	-0.473838	0.162298	-2.91956	0.00350522	0.14462	Noncoding
Gm9320	61.1972	-0.463284	0.158642	-2.92031	0.00349687	0.14462	Predicted
Rnf125	261.893	0.356321	0.122091	2.91849	0.00351731	0.14462	Coding
Gm10250	68.4143	-0.434088	0.148937	-2.91457	0.00356183	0.14462	Predicted
Dlg2.1	56.7654	-0.673369	0.231335	-2.9108	0.00360504	0.144661	Noncoding
Emp3	1123.51	0.405626	0.139334	2.91118	0.00360062	0.144661	Coding
Ccl5	11593.3	1.19256	0.410717	2.90361	0.00368893	0.147421	Coding
Cd86	73.9902	0.838976	0.289436	2.89866	0.0037476	0.148548	Coding
Prelid2	529.072	-0.322856	0.111375	-2.89883	0.00374559	0.148548	Coding
Stat1	923.378	0.21351	0.0738613	2.89069	0.00384402	0.149531	Coding
F2rl2	35.6951	0.728191	0.252054	2.88902	0.0038644	0.149531	Coding
Pag1	28.2014	0.825201	0.28513	2.89412	0.0038022	0.149531	Coding
Gm11273	37.5401	-0.579155	0.200428	-2.88959	0.00385742	0.149531	Predicted
Igfbp7	334.447	-1.07444	0.371751	-2.89022	0.00384977	0.149531	Coding
A130071D04Rik	703.664	0.211679	0.0732054	2.89157	0.00383324	0.149531	Noncoding
Gfra2	19.2514	1.24523	0.431914	2.88304	0.00393852	0.151796	Coding
Gm11281	49.0602	-0.529636	0.184234	-2.87481	0.00404276	0.154876	Predicted
Rps15a-ps5	66.6851	-0.451857	0.15721	-2.87423	0.00405018	0.154876	Ribosomal
Selenom	29.3367	0.781564	0.272346	2.86975	0.00410799	0.156412	Coding
Prr12	52.3224	-0.499232	0.174031	-2.86864	0.00412243	0.156412	Coding
Ormdl1	239.81	-0.258529	0.0902395	-2.86492	0.00417112	0.157091	Coding
Mrps6	385.322	-0.241453	0.0842823	-2.86481	0.00417256	0.157091	Coding
Irf1	415.403	0.375225	0.131074	2.8627	0.00420046	0.157533	Coding
Marcksl1	57.4815	-0.723275	0.253079	-2.8579	0.00426456	0.158717	Coding
Gm13611	336.055	-0.224887	0.0786788	-2.85829	0.00425933	0.158717	Predicted
Lgals9	174.901	0.276446	0.0968861	2.85331	0.00432661	0.159203	Coding
Cd200r4	57.6348	0.597015	0.20917	2.85421	0.00431439	0.159203	Coding
Gm6576	44.4507	-0.591473	0.207139	-2.85543	0.00429783	0.159203	Predicted
Rras	89.3071	-0.439396	0.15418	-2.84989	0.00437347	0.160322	Coding
Gm45201	19.4315	-0.918186	0.322606	-2.84616	0.00442502	0.161001	Predicted
Gm3511	17.5651	-0.824213	0.289484	-2.84718	0.00441089	0.161001	Predicted
Gm29257	29.9012	-0.692578	0.24351	-2.84415	0.00445305	0.161419	Predicted
Smad3	21.4173	1.01695	0.357907	2.84138	0.00449185	0.162222	Coding
Coro1a	6056.4	0.111489	0.0392883	2.8377	0.00454393	0.163498	Coding
Xlr4b	246.098	-0.302471	0.106637	-2.83644	0.00456191	0.163541	Coding
Runx1	111.411	0.565009	0.199445	2.83291	0.00461262	0.164753	Coding
Atp10d	56.8199	0.68389	0.241701	2.82949	0.00466226	0.16552	Coding
Cd44	492.519	-0.222297	0.0785755	-2.82909	0.00466804	0.16552	Coding
CT010506.1	41.205	-0.626126	0.221745	-2.82363	0.00474827	0.167755	Noncoding
Crebrf	170.436	0.341346	0.121056	2.81974	0.00480633	0.169193	Coding
Gm14279	36.0869	-0.608233	0.215954	-2.81649	0.00485508	0.169684	Predicted
Slc39a10	72.9649	-0.410035	0.145563	-2.81688	0.00484919	0.169684	Coding
Pmm2	96.4528	0.402321	0.142981	2.81381	0.00489579	0.170496	Coding
Kdm5a	290.995	0.22135	0.0787199	2.81187	0.00492544	0.170918	Coding
Itgax	18.6495	0.971692	0.345953	2.80874	0.00497355	0.171976	Coding
Ccng1	308.687	0.385508	0.13732	2.80736	0.00499489	0.172103	Coding
Gm11878	43.8089	-0.573522	0.20468	-2.80204	0.00507807	0.173925	Predicted
Dynll1	2005.08	-0.217711	0.0777068	-2.8017	0.00508343	0.173925	Coding
Fundc2	832.866	-0.201674	0.0720305	-2.79984	0.00511282	0.174318	Coding
Zdhhc18	770.429	0.214322	0.0766138	2.79743	0.00515106	0.17501	Coding
Ptprs	163.826	-0.378787	0.135466	-2.79618	0.00517104	0.175079	Coding
Slc16a6	125.562	0.45638	0.163284	2.795	0.00518995	0.175111	Coding
Meaf6	167.702	-0.293895	0.105215	-2.79329	0.00521744	0.175111	Coding
Erdr1	850.217	0.457444	0.163796	2.79277	0.00522587	0.175111	Coding
Ifi209	255.629	0.532531	0.19108	2.78695	0.00532059	0.177675	Coding
Gm4342	26.8871	-0.737292	0.264732	-2.78506	0.00535185	0.178109	Predicted
Il12rb2	295.958	0.368935	0.132621	2.78188	0.00540454	0.179251	Coding
Hmgb1	2396.55	-0.232129	0.0837163	-2.7728	0.0055576	0.183702	Coding
Gm14005	33.8942	0.619505	0.22375	2.76873	0.00562747	0.185383	Predicted
Tmbim1	108.302	-0.524628	0.18967	-2.766	0.00567478	0.185687	Coding
Gm11942	22.5824	-0.730364	0.264017	-2.76635	0.00566872	0.185687	Predicted
Satb1	839.108	0.35095	0.12702	2.76295	0.00572809	0.186805	Coding
5430427O19Rik	62.0993	0.533683	0.193246	2.76168	0.00575056	0.186912	Coding
Gna15	226.247	0.483241	0.175153	2.75896	0.00579855	0.187846	Coding
Furin	130.66	0.488778	0.177245	2.75764	0.00582203	0.187982	Coding
Mirt1	32.5434	0.771421	0.280111	2.75399	0.00588742	0.189466	Noncoding
Ppp1r9b	81.2587	0.438658	0.159757	2.74579	0.00603651	0.19093	Coding
Katna1	195.497	0.245248	0.0892755	2.7471	0.00601253	0.19093	Coding
Dpm2	195.73	0.243688	0.0886782	2.748	0.00599607	0.19093	Coding
Tmem123	555.072	-0.239148	0.0870885	-2.74603	0.00603213	0.19093	Coding
Mdm2	181.416	0.350081	0.127434	2.74716	0.0060114	0.19093	Coding
Phf20l1	608.802	-0.256288	0.0933641	-2.74504	0.0060504	0.19093	Coding
Gzmb	10229.5	0.721954	0.264427	2.73026	0.00632842	0.196287	Coding
Rapgef1	168.414	0.265641	0.0974061	2.72715	0.00638838	0.196287	Coding
Gstt3	19.4902	-0.820931	0.300538	-2.73153	0.00630401	0.196287	Coding
E430014B02Rik	84.2136	0.474676	0.173651	2.7335	0.00626656	0.196287	Noncoding
Kdm6bos	19.7317	0.944851	0.345768	2.73262	0.00628337	0.196287	Noncoding
Dgat1	134.929	0.354969	0.130038	2.72973	0.00633867	0.196287	Coding
Gm42814	64.521	-0.482976	0.177006	-2.72859	0.00636058	0.196287	Predicted
Nup210	171.856	0.286145	0.10495	2.72648	0.00640132	0.196287	Coding
Slc15a1	18.0719	-1.00492	0.368555	-2.72665	0.00639812	0.196287	Coding
Gbp4	763.452	0.256355	0.0941014	2.72424	0.0064449	0.197004	Coding
Prkx	105.795	0.35493	0.130622	2.71723	0.00658301	0.19903	Coding
H60b	69.8351	0.535323	0.197046	2.71674	0.00659283	0.19903	Coding
Ttc39c	186.035	0.345965	0.127216	2.7195	0.00653798	0.19903	Coding
C2cd4b	36.1453	-2.91375	1.07179	-2.71857	0.0065564	0.19903	Coding
Gimap7	872.998	0.320313	0.117966	2.71529	0.00662186	0.199289	Coding
Jam2	22.4725	-0.932383	0.343778	-2.71217	0.00668452	0.19941	Coding
Gm12338	30.6876	-0.618206	0.227919	-2.71239	0.00667992	0.19941	Predicted
Scand1	1559.63	0.171415	0.0632053	2.71203	0.00668721	0.19941	Coding
5330406M23Rik	45.1774	0.558043	0.206051	2.70828	0.00676334	0.201065	Noncoding
Ripk1	108.764	0.329195	0.12167	2.70564	0.00681736	0.202055	Coding
Epsti1	819.195	0.320678	0.118572	2.70449	0.00684085	0.202137	Coding
Gm8369	347.905	0.221268	0.0818592	2.70303	0.00687111	0.202417	Predicted
E2f2	51.9837	0.530284	0.196762	2.69505	0.00703778	0.205465	Coding
Ssbp2	37.8911	0.646793	0.239874	2.69638	0.00700969	0.205465	Coding
Cd200	461.269	-0.413956	0.153585	-2.69529	0.0070327	0.205465	Coding
Pura	611.85	-0.205053	0.0762601	-2.68886	0.00716963	0.207801	Coding
Lfng	332.412	0.328057	0.122032	2.6883	0.00718173	0.207801	Coding
Cish	371.021	-0.29653	0.110268	-2.68919	0.0071626	0.207801	Coding
Gm156	224.437	-1.56062	0.580876	-2.68666	0.00721703	0.208205	Coding
Slc3a2	1110.69	0.230037	0.0856645	2.68533	0.00724587	0.20842	Coding
Gm45454	31.3716	-0.598076	0.223108	-2.68066	0.00734776	0.21073	Predicted
Fam49a	36.3181	0.619356	0.231344	2.67721	0.00742377	0.212285	Coding
Tnip3	93.5627	0.705639	0.263748	2.67543	0.00746331	0.212343	Coding
Gm45153	48.4551	0.569937	0.213048	2.67516	0.00746936	0.212343	Predicted
Arhgdib	4071.11	0.16486	0.0616874	2.6725	0.00752884	0.213065	Coding
Gm6863	114.089	-0.310599	0.116239	-2.67207	0.00753846	0.213065	Predicted
St8sia4	166.597	0.366765	0.137348	2.67032	0.00757783	0.213559	Coding
Fuom	44.5415	0.540717	0.202645	2.66829	0.00762386	0.213621	Coding
M6pr	399.657	0.225923	0.0846539	2.66878	0.00761264	0.213621	Coding
Malat1	68991.3	0.210835	0.0790544	2.66696	0.00765404	0.213852	Noncoding
Rps21	20968.4	-0.0959795	0.0360129	-2.66514	0.00769562	0.2144	Ribosomal
Myo1g	254.665	0.275271	0.103377	2.66278	0.00774983	0.215295	Coding
Slc25a33	49.3977	0.566865	0.21298	2.66159	0.00777729	0.215444	Coding
Rhoa	2328.88	-0.109699	0.0412323	-2.66052	0.00780208	0.215519	Coding
Mndal	914.775	0.278054	0.104586	2.6586	0.00784656	0.216135	Coding
Ddit4	508.804	-0.293215	0.110348	-2.65717	0.00787986	0.216441	Coding
Rpl6	16700.1	-0.108827	0.0409734	-2.65605	0.00790629	0.216557	Ribosomal
Gm11539	29.7153	-0.621511	0.234202	-2.65374	0.00796044	0.217429	Predicted
Mctp2	52.1899	0.494486	0.186556	2.6506	0.00803496	0.218242	Coding
Gm15427	853.048	-0.156781	0.0591354	-2.65121	0.00802028	0.218242	Predicted
Setd1b	101.934	0.389384	0.147079	2.64745	0.00811008	0.219671	Coding
Foxo1	189.142	0.439999	0.166401	2.64421	0.00818817	0.221171	Coding
Gm45223	168.265	0.292615	0.110979	2.63669	0.00837204	0.225513	Predicted
AI467606	83.3019	0.384245	0.145791	2.63559	0.00839915	0.22562	Coding
Fam3c	203.952	-0.270513	0.102765	-2.63235	0.0084796	0.226592	Coding
Dhx40	107.147	0.384146	0.145989	2.63133	0.00850503	0.226592	Coding
Trp53bp2	24.9436	0.634086	0.240954	2.63156	0.00849937	0.226592	Coding
Gdi2	1632.11	-0.160226	0.0610861	-2.62296	0.00871702	0.231607	Coding
Lbr	369.424	0.214276	0.0817926	2.61975	0.0087994	0.23316	Coding
mt-Nd2	6748.14	0.112195	0.042867	2.61728	0.00886323	0.234075	Mitochondrial
Setd4	22.6538	0.679349	0.259725	2.61564	0.00890593	0.234075	Coding
Sirt5	38.3355	-0.555949	0.212474	-2.61655	0.00888237	0.234075	Coding
Tmem9b	247.432	0.24981	0.0955789	2.61365	0.00895797	0.234315	Coding
Cyba	2570.12	0.312638	0.119668	2.61254	0.00898716	0.234315	Coding
Sp100	1065.82	0.260215	0.0995913	2.61283	0.00897967	0.234315	Coding
Ptpn22	870.559	0.248401	0.0951144	2.61161	0.00901182	0.234331	Coding
Fam46c	135.007	0.355733	0.136337	2.60921	0.00907519	0.235352	Coding
Gm9013	24.931	-0.618065	0.237059	-2.60722	0.00912807	0.236095	Predicted
Flna	311.398	0.274985	0.105713	2.60124	0.00928863	0.239612	Coding
Natd1	16.2391	0.97182	0.37479	2.59297	0.00951515	0.244808	Coding
Gm38034	54.6446	0.51292	0.198047	2.58989	0.00960064	0.246358	Predicted
Smarca4	223.907	0.245659	0.09493	2.58779	0.00965931	0.247212	Coding
Gm37474	253.092	0.262503	0.101576	2.5843	0.0097576	0.249074	Predicted
AC158620.2	25.1002	-0.614118	0.237973	-2.58062	0.0098623	0.250436	Noncoding
Ptpn11	179.714	-0.271422	0.105166	-2.58089	0.00985459	0.250436	Coding
Cd81	72.4755	-0.642283	0.248984	-2.57962	0.00989103	0.250513	Coding
Gm9385	170.94	-0.271214	0.105213	-2.57777	0.00994393	0.2512	Predicted
Gm42684	18.1015	0.960761	0.373008	2.57571	0.0100034	0.251927	Predicted
Phf1	88.6395	0.348297	0.135262	2.57499	0.0100244	0.251927	Coding
Egr1	264.447	-0.270446	0.105147	-2.57209	0.0101088	0.252746	Coding
Pglyrp1	758.604	-0.418421	0.162629	-2.57285	0.0100865	0.252746	Coding
Zc3hav1	577.885	0.260915	0.10162	2.56756	0.0102417	0.255413	Coding
Sytl3	294.694	0.384367	0.149935	2.56355	0.0103608	0.257726	Coding
Cyth3	40.864	-0.616127	0.24098	-2.55676	0.0105653	0.262142	Coding
Gm8623	28.3561	-0.562711	0.220307	-2.55421	0.0106428	0.263397	Predicted
Gm5921	56.5691	-0.425874	0.166823	-2.55285	0.0106845	0.263758	Predicted
Ubb	11855.6	0.148318	0.0581246	2.55173	0.0107189	0.26391	Coding
Rab5c	482.276	0.170535	0.0668531	2.55089	0.0107448	0.26391	Coding
Adar	84.3288	0.357477	0.140279	2.54833	0.0108241	0.265189	Coding
Snhg20	78.87	0.350653	0.137753	2.54551	0.0109119	0.266671	Noncoding
Sema4c	75.1899	-0.579982	0.228151	-2.54209	0.0110191	0.266912	Coding
Tuba4a	261.142	0.269427	0.106002	2.54171	0.0110312	0.266912	Coding
Ms4a6b	3455.84	0.271534	0.10673	2.54412	0.0109555	0.266912	Coding
Rnf114	290.497	0.192836	0.0758223	2.54326	0.0109824	0.266912	Coding
Gm10132	20.6333	-0.710205	0.279602	-2.54006	0.0110835	0.267512	Predicted
Vcpip1	126.351	0.297648	0.117334	2.53676	0.0111882	0.269374	Coding
Rpl22	11198.3	-0.102653	0.0404927	-2.53508	0.011242	0.270002	Ribosomal
Cirbp	464.079	0.238222	0.0944174	2.52308	0.0116332	0.27475	Coding
Gbp5	92.5139	0.391634	0.155228	2.52297	0.0116369	0.27475	Coding
Lpgat1	177.088	-0.246833	0.0976804	-2.52695	0.0115059	0.27475	Coding
Rps15a-ps6	56.7629	-0.450475	0.17843	-2.52466	0.011581	0.27475	Ribosomal
Hnrnpdl	677.291	0.159553	0.0631867	2.52511	0.0115663	0.27475	Coding
BC035044	17.1381	0.788889	0.31259	2.52372	0.011612	0.27475	Coding
Eif4b	730.767	-0.21968	0.0869376	-2.52687	0.0115084	0.27475	Coding
Epb41	143.671	0.298338	0.118423	2.51925	0.0117606	0.276671	Coding
3830406C13Rik	246.194	-0.276475	0.109764	-2.51881	0.0117751	0.276671	Coding
Sarnp	605.005	-0.155497	0.0618796	-2.51289	0.0119747	0.280686	Coding
Rpa3	409.813	-0.172893	0.0688638	-2.51066	0.0120507	0.281115	Coding
Gm11703	45.2426	-0.579755	0.230863	-2.51125	0.0120304	0.281115	Predicted
Cdk6	693.12	-0.450902	0.17993	-2.50599	0.012211	0.282871	Coding
Gm7808	33.9051	-0.540443	0.21581	-2.50425	0.012271	0.282871	Predicted
Uhrf1bp1l	91.6841	0.360776	0.143905	2.50704	0.0121747	0.282871	Coding
Slc16a11	107.034	-0.580846	0.231925	-2.50445	0.0122641	0.282871	Coding
Prr7	76.5185	0.507112	0.202398	2.50552	0.0122272	0.282871	Coding
Mrpl23-ps1	87.7816	-0.355829	0.142189	-2.5025	0.0123319	0.282936	Noncoding
Cyfip2	353.362	0.191608	0.0765599	2.50273	0.0123241	0.282936	Coding
2310009A05Rik	148.748	-0.25609	0.102514	-2.49809	0.0124866	0.285815	Noncoding
Rpl24	4297.3	-0.111004	0.0444875	-2.49518	0.0125895	0.286771	Ribosomal
Herc4	93.9563	0.347522	0.139232	2.49599	0.0125605	0.286771	Coding
Twf1	73.8665	0.476864	0.191173	2.49441	0.0126166	0.286771	Coding
Kri1	55.2576	0.432686	0.173701	2.49098	0.012739	0.287537	Coding
H2-Q7	1817.44	0.250252	0.100496	2.49017	0.0127683	0.287537	Coding
Dbi	1257.05	-0.231021	0.0927116	-2.49182	0.012709	0.287537	Coding
Polg2	52.491	0.462575	0.185747	2.49035	0.0127619	0.287537	Coding
Gm14323	23.5295	-0.627696	0.252204	-2.48885	0.0128159	0.287944	Predicted
Rps6ka3	212.398	-0.276367	0.111154	-2.48635	0.012906	0.289302	Ribosomal
Nbeal2	90.9285	0.391017	0.157368	2.48473	0.0129651	0.28996	Coding
CAAA01194877.1	119.655	0.304673	0.122913	2.47877	0.0131838	0.294176	Noncoding
Pkp4	89.0482	-0.430657	0.174193	-2.4723	0.0134246	0.294772	Coding
Ttc3	229.466	-0.299851	0.121146	-2.47513	0.0133186	0.294772	Coding
Ctse	238.8	0.253572	0.10253	2.47314	0.0133931	0.294772	Coding
Ifi214	178.833	0.537503	0.217409	2.47231	0.0134242	0.294772	Coding
Sec61g	546.579	0.186074	0.0751244	2.47688	0.0132535	0.294772	Coding
Tapbpl	357.999	0.186561	0.0754516	2.47259	0.013414	0.294772	Coding
Ltb4r1	29.2371	0.763822	0.308656	2.47468	0.0133357	0.294772	Coding
Abhd17b	217.42	0.292461	0.11833	2.47156	0.0134523	0.294772	Coding
Kit	62.997	-0.475379	0.192656	-2.4675	0.0136059	0.296803	Coding
H2-T22	1074.8	0.232586	0.0942341	2.46817	0.0135805	0.296803	Coding
Gm5644	38.1276	-0.512978	0.208011	-2.46611	0.0136588	0.297293	Predicted
Gbp9	177.565	0.307324	0.124774	2.46305	0.0137761	0.298991	Coding
Sys1	451.07	0.225797	0.0916952	2.46248	0.0137982	0.298991	Coding
Hbp1	108.175	0.358441	0.145758	2.45915	0.0139266	0.301105	Coding
Nrp1	39.014	-0.679635	0.276541	-2.45762	0.0139859	0.301303	Coding
Ppp1r15b	131.806	0.294629	0.119898	2.45733	0.0139975	0.301303	Coding
Arhgef1	636.85	0.152865	0.062233	2.45634	0.0140362	0.301469	Coding
Vsig10	23.4225	-0.723514	0.294689	-2.45518	0.0140816	0.301779	Coding
Ikzf4	107.035	-0.35029	0.142845	-2.45225	0.0141966	0.303577	Coding
Timp2	69.3256	-0.714566	0.29168	-2.44983	0.0142925	0.304645	Coding
Vps37a	145.896	0.260102	0.10619	2.44941	0.014309	0.304645	Coding
Map3k1	251.055	0.339399	0.138617	2.44846	0.014347	0.304787	Coding
Mbd2	1188.16	0.131547	0.0538171	2.44433	0.0145121	0.307625	Coding
Rpl37	19472.6	-0.106459	0.0435864	-2.44247	0.0145871	0.308544	Ribosomal
Gm43302	159.876	0.329593	0.134998	2.44147	0.0146277	0.308559	Predicted
Gpm6b	309.791	-0.706272	0.28935	-2.44089	0.0146511	0.308559	Coding
Chd1l	58.6347	0.427954	0.175499	2.4385	0.0147483	0.309937	Coding
Gdpd5	26.5826	-0.632583	0.2595	-2.4377	0.0147811	0.309958	Coding
Gimap3	1385.58	0.213987	0.0878648	2.43541	0.0148748	0.310532	Coding
Rpl18-ps1	57.7899	-0.412059	0.169368	-2.43292	0.0149776	0.310532	Ribosomal
Acss1	53.1444	-0.393153	0.161684	-2.43162	0.0150314	0.310532	Coding
Gm37728	61.5258	0.586947	0.241055	2.43491	0.0148953	0.310532	Predicted
Phactr2	182.417	-0.238114	0.0978599	-2.43321	0.0149655	0.310532	Coding
Arhgef9	68.9303	-0.546018	0.224416	-2.43307	0.0149716	0.310532	Coding
Gramd3	471.915	0.789562	0.324648	2.43205	0.0150135	0.310532	Coding
Gm37718	32.317	0.564281	0.23229	2.42921	0.0151319	0.311947	Predicted
Mapk1ip1l	154.652	0.270416	0.111483	2.42563	0.0152817	0.314371	Coding
Ccdc34	224.152	-0.235527	0.0973507	-2.41937	0.0155475	0.319166	Coding
Csk	515.418	-0.17503	0.0724178	-2.41695	0.0156512	0.32062	Coding
Ppard	26.1251	0.572915	0.237733	2.40991	0.0159565	0.326188	Coding
Pde7a	234.908	0.348782	0.14494	2.40639	0.0161109	0.326606	Coding
Rps15a-ps4	31.9551	-0.54555	0.226681	-2.40668	0.0160983	0.326606	Ribosomal
Slc9a6	29.8873	-0.549331	0.228112	-2.40817	0.0160327	0.326606	Coding
Dnajb5	17.1449	-0.764591	0.317631	-2.40717	0.0160768	0.326606	Coding
Gpsm2	25.2253	0.617137	0.257084	2.40052	0.0163716	0.328972	Coding
Snapc1	147.392	0.2608	0.108551	2.40256	0.0162806	0.328972	Coding
Trmt112	859.888	-0.129861	0.0541265	-2.39922	0.0164301	0.328972	Coding
Slc29a1	196.266	-0.28292	0.117859	-2.4005	0.0163729	0.328972	Coding
Znrf2	328.597	0.213408	0.0889215	2.39996	0.0163968	0.328972	Coding
H2-T23	1919.68	0.265913	0.110698	2.40214	0.0162994	0.328972	Coding
B930095G15Rik	60.9445	-0.481342	0.200823	-2.39684	0.016537	0.330435	Noncoding
Anxa5	677.353	-0.183215	0.0765322	-2.39397	0.0166673	0.331679	Coding
Gm8062	19.8638	-0.667821	0.278932	-2.39421	0.0166564	0.331679	Predicted
Prdx1	2267.79	0.152827	0.0639134	2.39115	0.0167956	0.333552	Coding
2810474O19Rik	505.461	0.218427	0.0914258	2.38912	0.0168886	0.334039	Coding
C230085N15Rik	206.376	0.482566	0.201937	2.38968	0.016863	0.334039	Noncoding
Pop5	551.231	-0.150688	0.063229	-2.3832	0.0171627	0.338183	Coding
Bace2	35.4759	-0.723962	0.30379	-2.3831	0.0171675	0.338183	Coding
Trav17	23.7869	4.45486	1.87131	2.38061	0.0172841	0.339792	Coding
Mfap3	72.7855	0.360648	0.151759	2.37645	0.0174801	0.342293	Coding
Wdr95	111.897	0.587461	0.247204	2.37642	0.0174815	0.342293	Coding
Xrn2	797.915	0.187397	0.0789284	2.37426	0.0175842	0.343202	Coding
5830444F18Rik	293	0.401158	0.169035	2.37323	0.0176335	0.343202	Noncoding
Srpr	316.384	-0.177115	0.0746183	-2.37361	0.0176153	0.343202	Coding
Fam189b	255.724	0.300446	0.126675	2.37178	0.0177025	0.343858	Coding
Smco4	163.165	-0.278758	0.117647	-2.36945	0.0178146	0.34398	Coding
Mkrn1	558.479	0.186114	0.0785182	2.37033	0.0177722	0.34398	Coding
Nek7	414.633	-0.284562	0.12006	-2.37016	0.0177803	0.34398	Coding
Srgn	8322.62	0.153495	0.064833	2.36755	0.0179063	0.345068	Coding
Tsix	93.9915	-0.345426	0.146091	-2.36447	0.018056	0.346822	Noncoding
Kif21b	122.934	0.295341	0.124922	2.36421	0.0180684	0.346822	Coding
Zfp472	44.0099	0.480782	0.203502	2.36255	0.0181497	0.347697	Coding
Atp2a2	230.776	0.23267	0.0985673	2.36052	0.0182495	0.348924	Coding
Itk	593.862	0.233677	0.0990868	2.35831	0.0183586	0.349637	Coding
Mafg	129.159	0.293106	0.124266	2.35869	0.0183393	0.349637	Coding
Sema7a	54.9478	0.519519	0.220425	2.3569	0.0184283	0.350282	Coding
Bach2	134.529	-0.465129	0.19746	-2.35556	0.0184946	0.350857	Coding
Pxn	87.2876	0.331038	0.140591	2.35462	0.0185417	0.351069	Coding
Cipc	39.3321	0.499219	0.212178	2.35283	0.0186312	0.352078	Coding
Capn2	194.585	0.328488	0.139701	2.35135	0.0187053	0.352795	Coding
Soat1	208.321	-0.275945	0.117419	-2.35009	0.0187687	0.353308	Coding
Tmx2	111.796	-0.30863	0.131371	-2.3493	0.0188086	0.353377	Coding
Chid1	45.8157	-0.445516	0.189782	-2.34751	0.0188994	0.354401	Coding
Hist1h2ac	39.331	-0.713988	0.304345	-2.34598	0.0189771	0.355173	Coding
AC156795.1	24.9295	-0.601314	0.256513	-2.34419	0.0190685	0.356202	Noncoding
Mx1	73.6618	0.418604	0.17867	2.34289	0.019135	0.356227	Coding
Atf3	233.877	-0.424571	0.181229	-2.34274	0.019143	0.356227	Coding
Fyttd1	202.891	-0.241339	0.1031	-2.34083	0.0192411	0.357191	Coding
Glg1	233.102	-0.241162	0.103047	-2.34031	0.019268	0.357191	Coding
Bst2	614.582	0.306986	0.131509	2.33434	0.019578	0.362248	Coding
C330011M18Rik	33.962	-0.492801	0.211576	-2.32919	0.0198489	0.366565	Noncoding
Pofut1	32.2936	-0.543145	0.233358	-2.32752	0.0199376	0.367508	Coding
Gm43471	25.276	-0.565136	0.243527	-2.32062	0.0203071	0.373541	Predicted
Spint1	26.2882	-0.58981	0.25423	-2.31999	0.0203415	0.373541	Coding
Lck	1757.49	0.110549	0.0477036	2.31742	0.0204808	0.375392	Coding
Chek1	45.826	-0.471649	0.203932	-2.31278	0.0207349	0.379335	Coding
Ptpn6	671.326	-0.361351	0.15648	-2.30925	0.02093	0.382187	Coding
Gbp2	202.144	0.424456	0.184049	2.30622	0.0210985	0.382401	Coding
Cdkn2d	439.051	0.220953	0.0957808	2.30686	0.0210628	0.382401	Coding
Ms4a4b	7687.26	0.261265	0.113188	2.30824	0.020986	0.382401	Coding
Gm8520	28.4134	-0.522416	0.226462	-2.30686	0.0210624	0.382401	Predicted
Casp7	49.6143	0.428006	0.185714	2.30465	0.0211862	0.383278	Coding
Gm5835	26.1788	-0.57283	0.248746	-2.30287	0.0212862	0.384373	Predicted
Nap1l1	1241.32	-0.147228	0.0639998	-2.30044	0.0214234	0.385423	Coding
Lin54	83.9161	0.33408	0.145209	2.30069	0.0214094	0.385423	Coding
Sdhaf3	47.9894	-0.442312	0.192404	-2.29887	0.0215124	0.386312	Coding
Rab8b	486.376	0.168815	0.0734585	2.2981	0.0215559	0.386382	Coding
Gng2	1066.74	0.260143	0.113265	2.29677	0.0216319	0.387033	Coding
A530083M17Rik	60.5774	-0.536268	0.233637	-2.2953	0.0217159	0.387121	Noncoding
Srxn1	34.0605	0.639866	0.278773	2.29529	0.0217163	0.387121	Coding
Scimp	112.096	-0.49964	0.218093	-2.29095	0.0219663	0.390864	Coding
Rasgrp1	123.851	0.276314	0.120664	2.28995	0.0220244	0.391184	Coding
Cep76	25.8253	0.543982	0.237773	2.28782	0.022148	0.392664	Coding
Tbxa2r	41.6803	0.52723	0.23067	2.28564	0.0222751	0.393487	Coding
Rcbtb2	55.6694	0.43201	0.18896	2.28624	0.0222399	0.393487	Coding
Arrdc4	58.447	-0.447561	0.196306	-2.27992	0.0226126	0.398725	Coding
Smim11	407.288	-0.163217	0.0716368	-2.2784	0.0227026	0.399591	Coding
H2-Q6	307.728	0.186224	0.0817791	2.27716	0.0227769	0.400175	Coding
Nop14	162.143	0.264323	0.116193	2.27487	0.0229138	0.400695	Coding
Tulp4	110.597	0.370514	0.162952	2.27375	0.0229807	0.400695	Coding
Heca	198.796	0.223993	0.0985084	2.27384	0.0229753	0.400695	Coding
Bbc3	44.938	0.472001	0.207539	2.27428	0.0229491	0.400695	Coding
Apbb1ip	340.552	0.243208	0.10702	2.27255	0.023053	0.400695	Coding
Usp25	365.464	0.206919	0.0910497	2.2726	0.0230505	0.400695	Coding
Neu1	92.8726	0.303857	0.133862	2.26993	0.0232117	0.402735	Coding
2810001G20Rik	26.8032	0.53616	0.236368	2.26832	0.0233095	0.402997	Noncoding
Rasa3	78.9846	0.476306	0.209972	2.26843	0.0233033	0.402997	Coding
Sh2d5	18.6195	0.751397	0.331556	2.26627	0.0234347	0.404445	Coding
Rpl14-ps1	94.748	-0.286925	0.126659	-2.26534	0.023492	0.404718	Ribosomal
Mta3	222.054	0.233402	0.103146	2.26283	0.0236459	0.406651	Coding
Miga1	36.9797	-0.485917	0.214847	-2.26169	0.0237165	0.407148	Coding
Lias	104.429	0.269079	0.119028	2.26062	0.0237825	0.407438	Coding
Synpo	23.6927	-0.830921	0.367653	-2.26007	0.023817	0.407438	Coding
Flnb	75.5425	-0.358223	0.158585	-2.25887	0.0238913	0.407993	Coding
Atf6	71.4007	0.342097	0.151666	2.2556	0.0240959	0.41049	Coding
Icos	1404.4	0.321062	0.142366	2.25519	0.0241217	0.41049	Coding
Trbc2	8467.33	0.188541	0.0836371	2.25427	0.0241789	0.410746	Coding
A430093F15Rik	184.038	-0.371867	0.165032	-2.2533	0.02424	0.411068	Noncoding
Tax1bp1	878.8	0.188292	0.0836402	2.25121	0.0243721	0.411163	Coding
Gm28935	83.4581	0.411829	0.182854	2.25223	0.0243077	0.411163	Predicted
Crim1	53.8831	0.494541	0.219629	2.25171	0.0243404	0.411163	Coding
Rpl21-ps8	30.8292	-0.481649	0.21417	-2.24891	0.0245183	0.412915	Ribosomal
Tmem37	27.2535	0.520974	0.231739	2.2481	0.0245695	0.413065	Coding
Mrpl57	676.519	0.147284	0.0656037	2.24506	0.0247641	0.41562	Coding
Hist1h4d	123.309	-0.324946	0.14479	-2.24425	0.0248161	0.415777	Coding
Cggbp1	461.354	0.158631	0.0707205	2.24307	0.0248922	0.416289	Coding
Mki67	591.396	0.209313	0.0933412	2.24245	0.0249321	0.416289	Coding
Chd1	346.07	0.180118	0.0803613	2.24136	0.025003	0.416759	Coding
Pign	35.2685	-0.481509	0.215027	-2.23929	0.0251368	0.418275	Coding
Mboat7	106.268	-0.305553	0.136642	-2.23615	0.0253417	0.419536	Coding
Ubtf	362.14	-0.168546	0.0753729	-2.23616	0.025341	0.419536	Coding
Atp2a3	126.855	0.268349	0.119943	2.2373	0.0252669	0.419536	Coding
Rpsa-ps9	24.4617	-0.538929	0.241145	-2.23488	0.0254252	0.420206	Noncoding
Snhg3	250.198	0.241814	0.108286	2.23311	0.0255419	0.420387	Noncoding
0610009B22Rik	70.7936	-0.328381	0.147075	-2.23275	0.0255655	0.420387	Coding
Oser1	288.294	0.239841	0.107413	2.23288	0.0255566	0.420387	Coding
Grn	65.0638	-0.347191	0.155672	-2.23027	0.0257296	0.422247	Coding
Gm8430	347.701	-0.185033	0.0829872	-2.22966	0.0257702	0.422247	Predicted
Cdc34	238.655	0.22755	0.102083	2.22908	0.0258085	0.422247	Coding
Gm6472	1264.15	-0.139398	0.0626182	-2.22616	0.0260037	0.423168	Predicted
Irgm2	49.6646	0.473182	0.212578	2.22592	0.0260197	0.423168	Coding
Ralbp1	565.502	-0.159971	0.0718712	-2.2258	0.0260273	0.423168	Coding
Arl3	191.73	-0.222681	0.100052	-2.22564	0.0260385	0.423168	Coding
Erlin2	24.5803	-0.538358	0.241986	-2.22475	0.0260983	0.423175	Coding
Psmd9	167.807	0.221462	0.0995629	2.22434	0.0261257	0.423175	Coding
Hist1h4i	66.0736	0.388745	0.174854	2.22326	0.0261983	0.423648	Coding
Rpl28	19736.8	-0.11669	0.0525915	-2.2188	0.0265005	0.427825	Ribosomal
Cd28	1272.79	0.244759	0.110566	2.21368	0.0268506	0.432401	Coding
Rpl36a	9641.08	-0.132381	0.0598098	-2.21336	0.0268726	0.432401	Ribosomal
Gzmk	192.334	0.832696	0.376798	2.20992	0.0271104	0.433367	Coding
Dennd4c	85.7387	0.324272	0.146729	2.21001	0.0271043	0.433367	Coding
Acsl5	417.852	-0.173349	0.0784122	-2.21073	0.0270543	0.433367	Coding
Pi4k2a	71.6085	0.336009	0.151975	2.21095	0.0270395	0.433367	Coding
9930111J21Rik2	422.391	0.226534	0.102674	2.20635	0.0273598	0.434398	Coding
Gm45222	68.2814	0.361738	0.164016	2.20551	0.0274184	0.434398	Predicted
Tox4	216.178	0.202071	0.0915133	2.2081	0.0272373	0.434398	Coding
Gm37593	61.5683	0.426522	0.193419	2.20517	0.0274422	0.434398	Predicted
Zbtb32	441.966	0.203836	0.0923549	2.20709	0.0273077	0.434398	Coding
Gon7	110.019	-0.292165	0.13249	-2.20519	0.027441	0.434398	Coding
Clip2	24.0116	-0.618677	0.280718	-2.20391	0.0275308	0.435093	Coding
Riox2	103.35	-0.270593	0.122964	-2.20059	0.0277651	0.438086	Coding
Ccdc112	40.1542	-0.480457	0.21846	-2.19929	0.027857	0.438827	Coding
Nfkb2	196.457	-0.241002	0.109703	-2.19686	0.0280301	0.440841	Coding
Ywhah	1068.07	-0.12845	0.0584954	-2.1959	0.0280994	0.44122	Coding
Gm8730	8627.17	0.106403	0.0484846	2.19458	0.0281936	0.441987	Predicted
Taf5	55.6692	0.359197	0.163789	2.19305	0.028304	0.443005	Coding
Ctage5	191.986	0.262553	0.119761	2.19231	0.028357	0.443123	Coding
Tmem38b	85.1196	-0.292038	0.133262	-2.19146	0.0284183	0.44337	Coding
A630072M18Rik	88.3904	0.280918	0.128323	2.18915	0.028586	0.443709	Noncoding
Runx2	542.752	0.224853	0.102661	2.19025	0.0285064	0.443709	Coding
Dync1li1	173.785	-0.213345	0.097463	-2.18898	0.0285983	0.443709	Coding
Tshz1	132.792	-0.257509	0.117656	-2.18865	0.028622	0.443709	Coding
Hist1h2be	48.2761	-0.435792	0.199241	-2.18727	0.0287232	0.443866	Coding
Pacs1	78.5629	0.317631	0.145211	2.18737	0.0287153	0.443866	Coding
Eva1b	503.02	-0.276744	0.1267	-2.18425	0.0289441	0.446573	Coding
Akt2	218.756	0.202281	0.0926655	2.18292	0.0290417	0.446939	Coding
Lman2	693.99	0.140296	0.064288	2.1823	0.0290875	0.446939	Coding
Ctsc	343.68	-0.228185	0.104573	-2.18206	0.0291054	0.446939	Coding
Ly6a	1779.12	0.870878	0.399338	2.1808	0.0291979	0.447359	Coding
Gpr183	765.579	0.257158	0.117938	2.18045	0.0292244	0.447359	Coding
Rusc1	74.5501	0.302514	0.138829	2.17905	0.0293282	0.448243	Coding
Atg2a	62.385	0.340884	0.156857	2.17321	0.0297642	0.449282	Coding
Rpl31	3188.26	-0.0926248	0.04255	-2.17684	0.0294923	0.449282	Ribosomal
Fam117a	48.3801	0.44131	0.203269	2.17106	0.0299267	0.449282	Coding
Gm36932	77.1966	0.315668	0.145407	2.17093	0.0299362	0.449282	Predicted
Edrf1	32.151	0.466765	0.214382	2.17726	0.0294612	0.449282	Coding
Lmbr1l	54.6959	0.357622	0.164332	2.17622	0.029539	0.449282	Coding
Rap1b	1712.47	0.169769	0.078179	2.17154	0.0298903	0.449282	Coding
Hid1	29.8228	0.583072	0.268577	2.17096	0.0299339	0.449282	Coding
Nfyb	315.144	-0.177077	0.081466	-2.17363	0.0297329	0.449282	Coding
Ptpre	104.1	0.367041	0.168865	2.17358	0.0297369	0.449282	Coding
Rtp4	183.581	0.677276	0.311574	2.17373	0.0297257	0.449282	Coding
Max	477.363	-0.224665	0.103496	-2.17076	0.0299491	0.449282	Coding
C230024C17Rik	40.5123	-0.504483	0.232764	-2.16736	0.0302072	0.450423	Noncoding
B230206I08Rik	34.3343	-0.612982	0.282728	-2.1681	0.030151	0.450423	Noncoding
Slc44a2	212.873	-0.2142	0.0988591	-2.16672	0.0302561	0.450423	Coding
Plekhf2	88.4033	0.28555	0.131755	2.16728	0.0302132	0.450423	Coding
Tbc1d22a	62.3917	0.338132	0.155959	2.16808	0.0301527	0.450423	Coding
Rps3a1	24223.9	-0.111769	0.0516129	-2.16553	0.0303474	0.450445	Ribosomal
Fkbp1a	1936.11	-0.164977	0.0761843	-2.16549	0.0303499	0.450445	Coding
Gm12250	191.181	0.380746	0.175887	2.16473	0.0304087	0.450631	Predicted
Flot1	110.923	0.302108	0.139696	2.16261	0.0305715	0.451671	Coding
Sytl2	109.059	0.435147	0.201185	2.16292	0.0305474	0.451671	Coding
Rpl7-ps7	640.341	-0.145428	0.0673025	-2.1608	0.0307106	0.452355	Ribosomal
Pmm1	34.3299	0.614453	0.284321	2.16112	0.0306858	0.452355	Coding
Rest	223.651	-0.187127	0.0866463	-2.15966	0.0307988	0.452971	Coding
Ppie	320.251	-0.203407	0.0943448	-2.15599	0.0310842	0.45478	Coding
Fasl	438.293	0.267573	0.124043	2.1571	0.0309978	0.45478	Coding
Topbp1	192.878	0.251857	0.116826	2.15582	0.0310973	0.45478	Coding
Pfkp	700.028	0.17901	0.0830411	2.15568	0.0311084	0.45478	Coding
Gm45220	62.0788	0.335189	0.155637	2.15365	0.0312675	0.455452	Predicted
Kcnq1ot1	368.803	0.214574	0.0997037	2.15212	0.0313879	0.455452	Noncoding
Tmem203	97.4877	0.313023	0.145405	2.15277	0.0313368	0.455452	Coding
P3h2	18.4721	-1.54796	0.718752	-2.15368	0.0312652	0.455452	Coding
Cdk5rap3	158.648	0.248841	0.115611	2.15241	0.0313655	0.455452	Coding
Gm15710	40.2385	-0.41365	0.192285	-2.15123	0.0314583	0.455794	Predicted
Pcgf2	28.9514	-0.479505	0.223005	-2.1502	0.0315397	0.456296	Coding
Trappc6a	405.58	-0.18868	0.0878432	-2.14792	0.0317199	0.457546	Coding
Rps20	27781.3	-0.117953	0.0549056	-2.14829	0.0316907	0.457546	Ribosomal
Plxdc2	45.0871	-0.410962	0.1916	-2.14489	0.0319613	0.458693	Coding
Gm17173	26.1517	-0.558545	0.260433	-2.14468	0.0319788	0.458693	Predicted
Arhgap25	87.6404	0.343059	0.159995	2.14418	0.0320185	0.458693	Coding
Smyd3	204.222	-0.481215	0.224217	-2.1462	0.0318569	0.458693	Coding
Gm5239	44.6832	-0.410586	0.191506	-2.14398	0.0320347	0.458693	Predicted
Glud1	671.541	-0.150701	0.0703099	-2.14338	0.0320824	0.458703	Coding
Thap2	110.792	-0.279447	0.13043	-2.1425	0.0321532	0.459042	Coding
Nudt4	314.831	-0.214974	0.100503	-2.13899	0.0324368	0.462414	Coding
Bcl2	1287.65	-0.460482	0.215952	-2.13233	0.0329795	0.464718	Coding
Hdhd2	95.6245	-0.271065	0.127088	-2.13289	0.0329339	0.464718	Coding
Xpo1	215.367	0.204708	0.0959771	2.13288	0.0329346	0.464718	Coding
Cd8a	4702.54	-0.205483	0.0963916	-2.13175	0.0330273	0.464718	Coding
Rab2a	604.354	0.156017	0.0731285	2.13346	0.0328869	0.464718	Coding
Lef1	123.92	0.704196	0.330043	2.13365	0.0328713	0.464718	Coding
Ier5l	480.866	-0.51551	0.241355	-2.1359	0.0326874	0.464718	Coding
Pycr2	204.046	-0.19675	0.0922936	-2.13178	0.033025	0.464718	Coding
Gm8213	43.1342	-0.42269	0.198211	-2.13252	0.0329639	0.464718	Predicted
Tmem140	44.0712	0.544036	0.255278	2.13115	0.0330769	0.464744	Coding
Gm14295	22.2423	-0.737126	0.345976	-2.13057	0.0331247	0.464747	Predicted
Cd160	692.748	-0.26063	0.122441	-2.12861	0.0332861	0.466341	Coding
Nedd4	147.037	-0.340011	0.159825	-2.12739	0.0333874	0.467088	Coding
Plxnc1	46.3625	0.473896	0.222927	2.12579	0.0335208	0.467613	Coding
Pstpip1	559.946	0.163878	0.0770836	2.12598	0.0335053	0.467613	Coding
Zeb2	178.924	0.384286	0.180913	2.12415	0.0336575	0.467689	Coding
Wdr92	91.0633	-0.329413	0.155091	-2.124	0.0336701	0.467689	Coding
Anp32a	1264.99	-0.229027	0.107792	-2.12471	0.0336106	0.467689	Coding
mt-Nd4	7476.9	0.0941537	0.0444144	2.11989	0.0340153	0.470836	Mitochondrial
Gas5	1911.56	-0.146615	0.0691717	-2.11958	0.0340416	0.470836	Noncoding
Il4ra	80.4357	0.423017	0.199535	2.12002	0.0340043	0.470836	Coding
Gpr132	199.117	0.443476	0.209554	2.11628	0.0343207	0.474025	Coding
Qpct	86.768	-0.560993	0.266072	-2.10843	0.034994	0.48264	Coding
2900093K20Rik	22.2526	0.517839	0.245925	2.10568	0.0352324	0.483194	Noncoding
Rpl36-ps2	40.1062	-0.39722	0.188589	-2.10627	0.035181	0.483194	Ribosomal
Timm17b	330.958	-0.160394	0.0761607	-2.106	0.0352044	0.483194	Coding
Gid8	165.76	-0.211406	0.100337	-2.10696	0.0351214	0.483194	Coding
Cnrip1	30.4	-0.454641	0.215977	-2.10504	0.0352878	0.483274	Coding
Nfatc3	195.508	0.225668	0.107313	2.1029	0.0354749	0.485156	Coding
Ifitm3	1374.95	0.185157	0.0880898	2.10191	0.0355609	0.485651	Coding
Ticam1	19.9384	0.561377	0.267579	2.09799	0.0359062	0.48968	Coding
Abhd2	171.185	-0.22393	0.106805	-2.09662	0.0360273	0.490645	Coding
Gimap9	438.359	0.207797	0.0992436	2.09381	0.036277	0.492924	Coding
Slfn9	55.6627	-0.341632	0.163179	-2.0936	0.0362957	0.492924	Coding
Arpc1a	222.402	0.21185	0.101245	2.09244	0.0363989	0.493638	Coding
Rpl5	6778.17	-0.0936313	0.0447923	-2.09034	0.036587	0.4955	Ribosomal
Agap3	41.0221	0.381411	0.182672	2.08795	0.0368022	0.497723	Coding
Pea15a	124.983	0.256308	0.122849	2.08637	0.0369447	0.49858	Coding
Zfpm1	123.445	-0.234347	0.112336	-2.08612	0.0369678	0.49858	Coding
Sh3rf1	23.6355	-0.527057	0.252893	-2.08411	0.0371502	0.499484	Coding
Farp1	44.8291	-0.448952	0.215635	-2.082	0.0373422	0.499484	Coding
Mnd1	34.3313	-0.483268	0.231984	-2.08319	0.0372337	0.499484	Coding
Gpx1	498.663	0.170199	0.0816825	2.08367	0.0371901	0.499484	Coding
Snrpf	1252.5	-0.1133	0.0544145	-2.08216	0.0373282	0.499484	Coding
Clic4	203.908	-0.217889	0.104649	-2.08209	0.037334	0.499484	Coding
Hivep2	183.66	0.312896	0.150365	2.08091	0.037442	0.500133	Coding
Hmg20b	211.154	-0.210366	0.101388	-2.07485	0.0380003	0.504626	Coding
Zfp952	20.977	0.586942	0.282792	2.07553	0.0379377	0.504626	Coding
Gmeb1	57.7878	0.344137	0.16582	2.07537	0.0379525	0.504626	Coding
Gm13573	16.2276	-0.613654	0.295815	-2.07445	0.0380371	0.504626	Predicted
Ankrd54	108.795	0.25243	0.121616	2.07564	0.0379276	0.504626	Coding
Pcmt1	322.688	-0.180029	0.0868448	-2.073	0.0381723	0.505731	Coding
Havcr2	580.898	0.7034	0.340649	2.06488	0.0389342	0.510178	Coding
4833403J16Rik	33.2195	0.484216	0.234169	2.06781	0.038658	0.510178	Noncoding
Dap	888.844	-0.225578	0.10929	-2.06403	0.0390146	0.510178	Coding
Zfp995	22.964	0.50111	0.242757	2.06424	0.0389946	0.510178	Coding
Gm38120	56.6251	0.413747	0.200215	2.06651	0.0387801	0.510178	Predicted
Clp1	90.8912	0.284086	0.137648	2.06386	0.0390311	0.510178	Coding
Mcub	66.0903	-0.375432	0.181664	-2.06663	0.038769	0.510178	Coding
Eef1a1	51221.4	-0.11601	0.0561991	-2.06426	0.0389926	0.510178	Coding
Gcnt1	131.793	-0.408038	0.197577	-2.06521	0.0389031	0.510178	Coding
Arhgap45	852.555	0.160257	0.0775441	2.06665	0.0387669	0.510178	Coding
Strbp	114.719	-0.282761	0.137046	-2.06325	0.0390887	0.510247	Coding
Prkd2	82.7858	0.356724	0.173086	2.06097	0.0393064	0.511035	Coding
Nab2	184.851	-0.23667	0.114825	-2.06114	0.0392898	0.511035	Coding
Plscr4	19.8421	-0.806938	0.3914	-2.06167	0.039239	0.511035	Coding
Cd47	2598.32	0.143059	0.0695032	2.05831	0.0395602	0.513651	Coding
Nod1	30.3835	0.490715	0.238475	2.05772	0.0396172	0.513706	Coding
Zc3h6	68.5289	0.354362	0.172549	2.05369	0.040006	0.517372	Coding
Atf4	639.784	0.154441	0.0751855	2.05414	0.0399624	0.517372	Coding
Mysm1	174.087	0.202438	0.0986062	2.05299	0.0400735	0.517559	Coding
Gm4617	22.7884	-0.53154	0.259428	-2.04889	0.0404729	0.522025	Predicted
Hmgn2	799.918	-0.189028	0.0924821	-2.04394	0.0409597	0.524833	Coding
Cd69	536.413	0.27063	0.132362	2.04463	0.0408914	0.524833	Coding
Gna13	558.069	0.250761	0.122673	2.04414	0.0409397	0.524833	Coding
Psmb10	841.123	0.110628	0.0541184	2.04418	0.0409358	0.524833	Coding
Rbm8a	675.69	0.129026	0.063066	2.04589	0.0407676	0.524833	Coding
Rpsa-ps1	36.6014	-0.41236	0.201902	-2.04237	0.0411145	0.526125	Noncoding
Spry2	182.834	-0.279015	0.136689	-2.04124	0.0412273	0.526877	Coding
Npc2	1263.67	0.167946	0.0823684	2.03896	0.041454	0.528787	Coding
Fam173b	88.894	-0.270783	0.132825	-2.03865	0.0414852	0.528787	Coding
Samd9l	267.68	0.211226	0.10365	2.03787	0.0415625	0.528934	Coding
Anapc5	447.072	0.162809	0.0799081	2.03745	0.0416052	0.528934	Coding
Itpa	226.589	0.191764	0.0943331	2.03283	0.0420693	0.532132	Coding
Calr	2882.72	0.141397	0.0695938	2.03175	0.042179	0.532132	Coding
Oas3	55.6538	0.597739	0.293983	2.03324	0.042028	0.532132	Coding
Commd8	313.461	0.207253	0.101991	2.03207	0.0421465	0.532132	Coding
Usp48	160.569	0.224743	0.110618	2.0317	0.0421842	0.532132	Coding
Grap2	130.147	0.343271	0.168821	2.03334	0.0420181	0.532132	Coding
Egr3	95.9208	-0.467221	0.230263	-2.02908	0.0424504	0.534798	Coding
Nsun5	30.9301	-0.462486	0.228154	-2.02708	0.0426544	0.536674	Coding
Gm5586	33.4771	-0.44292	0.218998	-2.02249	0.0431261	0.537066	Predicted
Arhgap11a	78.3756	0.286268	0.141445	2.02388	0.0429824	0.537066	Coding
Elp5	133.921	0.224878	0.111149	2.02321	0.0430517	0.537066	Coding
Aar2	59.2015	0.319125	0.157771	2.02272	0.0431022	0.537066	Coding
Trp53	475.193	-0.132162	0.065318	-2.02336	0.0430357	0.537066	Coding
Zfp862-ps	156.759	-0.248529	0.122751	-2.02465	0.0429033	0.537066	Noncoding
Ubc	1211.56	0.226625	0.111996	2.0235	0.0430217	0.537066	Coding
Lgals7	48.9621	-0.69962	0.345333	-2.02593	0.0427723	0.537066	Coding
Psma2	1820.09	0.105161	0.052062	2.01992	0.0433915	0.538308	Coding
Serpina3g	455.704	-0.548355	0.271458	-2.02004	0.0433796	0.538308	Coding
Tmed1	28.7482	-0.44228	0.218871	-2.02073	0.0433074	0.538308	Coding
Ccr8	29.9871	-0.494971	0.245126	-2.01925	0.043461	0.538486	Coding
Xrcc6	76.2859	-0.301415	0.149506	-2.01608	0.0437918	0.539742	Coding
Mapkapk2	398.904	0.167715	0.0831516	2.01698	0.0436971	0.539742	Coding
Rps15a-ps3	55.3905	-0.357287	0.177198	-2.01631	0.0437673	0.539742	Ribosomal
Prdm1	185.333	0.329341	0.163279	2.01705	0.0436907	0.539742	Coding
AL607105.1	194.234	-0.218405	0.108356	-2.01563	0.0438392	0.539742	Coding
Ubash3b	393.068	-0.368183	0.182797	-2.01416	0.0439923	0.540944	Coding
Glipr1	323.222	0.409231	0.20367	2.00929	0.0445068	0.545894	Coding
Rps15a	33832.9	-0.108282	0.0538862	-2.00946	0.0444886	0.545894	Ribosomal
Slc25a4	1461.34	-0.0961125	0.0478677	-2.00788	0.0446562	0.546429	Coding
Tspyl1	174.087	0.196487	0.0978609	2.00782	0.0446625	0.546429	Coding
Rps7	15514	-0.0990088	0.0493265	-2.00721	0.0447271	0.546533	Ribosomal
Mfhas1	45.8625	-0.448114	0.223488	-2.00509	0.0449529	0.54792	Coding
Atp5sl	88.3513	0.270167	0.134723	2.00536	0.0449245	0.54792	Coding
Ptpn7	369.662	-0.21305	0.106324	-2.00379	0.0450927	0.548937	Coding
Myb	59.0551	0.550511	0.275274	1.99987	0.0455146	0.552006	Coding
Mnt	69.719	0.327782	0.163819	2.00088	0.0454049	0.552006	Coding
Tmem120b	43.9819	-0.372484	0.186233	-2.00009	0.0454901	0.552006	Coding
Wdr33	127.668	0.225086	0.112609	1.99883	0.0456271	0.552683	Coding
Eif3e	2495.96	-0.096713	0.0484161	-1.99754	0.0457669	0.553688	Coding
Mir703	290.92	-0.186075	0.0932042	-1.99642	0.0458881	0.553839	Noncoding
Sos1	41.8688	0.412786	0.206768	1.99638	0.0458929	0.553839	Coding
Gm15483	22.8137	-0.495554	0.248435	-1.9947	0.0460758	0.554502	Predicted
Brap	60.9271	0.314942	0.157838	1.99535	0.0460048	0.554502	Coding
Fam91a1	51.763	0.349255	0.175126	1.99431	0.0461184	0.554502	Coding
Elavl1	484.59	-0.130072	0.0652791	-1.99255	0.0463103	0.555439	Coding
Gm17745	215.96	-0.278252	0.139636	-1.9927	0.0462942	0.555439	Predicted
Supt5	180.877	0.204266	0.10258	1.99128	0.0464498	0.555744	Coding
Cited2	503.831	0.241194	0.121121	1.99134	0.0464437	0.555744	Coding
Nfkbid	130.544	0.400805	0.201563	1.98849	0.0467581	0.557468	Coding
Xaf1	228.544	0.282409	0.141958	1.98939	0.0466583	0.557468	Coding
Hk1	213.421	-0.191472	0.0962937	-1.98842	0.0467653	0.557468	Coding
Rps13	19188.1	-0.0867778	0.0436595	-1.9876	0.0468558	0.557864	Ribosomal
Itgb2	1033.15	0.223965	0.112732	1.98671	0.046955	0.558363	Coding
Gm37039	38.8465	0.461464	0.232475	1.98501	0.0471433	0.55992	Predicted
Stk39	380.847	-0.18161	0.0915172	-1.98444	0.0472072	0.559997	Coding
Magi3	20.188	-0.665994	0.335822	-1.98318	0.0473477	0.560981	Coding
Rps29	27914	-0.0809428	0.0408556	-1.98119	0.0475698	0.562246	Ribosomal
Faah	86.09	-0.310396	0.156667	-1.98124	0.0475644	0.562246	Coding
Osbpl9	144.12	0.263192	0.132966	1.97939	0.0477725	0.563958	Coding
Usp39	161.661	0.200229	0.101202	1.9785	0.0478721	0.564169	Coding
5033430I15Rik	66.0701	0.295818	0.149539	1.9782	0.0479061	0.564169	Noncoding
Gm43413	29.792	-0.552545	0.279409	-1.97755	0.0479795	0.564352	Predicted
Hist1h1d	89.8207	-0.279342	0.141318	-1.97668	0.0480773	0.564769	Coding
Lta4h	153.668	-0.225263	0.113987	-1.97621	0.0481307	0.564769	Coding
Fam60a	177.519	-0.235872	0.119562	-1.97281	0.0485176	0.568624	Coding
Nek6	129.771	-0.390415	0.198046	-1.97134	0.0486851	0.569902	Coding
Scg5	95.6853	-0.327364	0.166148	-1.97031	0.0488029	0.57041	Coding
Ncald	60.9907	0.420648	0.213534	1.96994	0.0488455	0.57041	Coding
Impdh1	163.547	0.232219	0.117961	1.9686	0.0489985	0.571437	Coding
Gstp-ps	56.2308	-0.329468	0.1674	-1.96815	0.0490506	0.571437	Noncoding
2700097O09Rik	56.2905	-0.357098	0.181719	-1.96511	0.0494013	0.571645	Coding
Kifc3	41.9559	-0.493612	0.251252	-1.9646	0.04946	0.571645	Coding
Rnasel	96.2492	0.263744	0.134205	1.96523	0.0493871	0.571645	Coding
2310011J03Rik	219.908	0.186797	0.0951084	1.96404	0.0495257	0.571645	Coding
Cd247	688.672	0.183275	0.0933273	1.96379	0.0495544	0.571645	Coding
Rbl2	298.316	0.22178	0.112882	1.96472	0.049447	0.571645	Coding
Lair1	108.564	-0.365006	0.185689	-1.96569	0.0493345	0.571645	Coding
Arid4b	403.861	0.134356	0.0683514	1.96567	0.049337	0.571645	Coding
Slc39a3	35.1597	0.384165	0.19571	1.96293	0.0496547	0.571645	Coding
Rnf40	63.0108	0.309762	0.157799	1.96301	0.0496445	0.571645	Coding
Gm45221	107.864	0.273249	0.139314	1.96139	0.0498331	0.573022	Predicted
Gm43387	24.8239	0.486806	0.248395	1.9598	0.0500189	0.573696	Predicted
1110004E09Rik	109.115	0.243368	0.124207	1.95938	0.0500683	0.573696	Coding
Cdkn2b	53.1114	-0.594851	0.303486	-1.96006	0.0499891	0.573696	Coding
Dip2b	187.898	-0.182422	0.09325	-1.95627	0.0504331	0.574186	Coding
Krtcap2	2043.68	0.105915	0.0541408	1.9563	0.0504303	0.574186	Coding
Mir155hg	186.253	0.226484	0.115789	1.95601	0.0504643	0.574186	Noncoding
Irf2bpl	155.9	0.21224	0.108454	1.95695	0.0503529	0.574186	Coding
Hvcn1	88.4414	-0.276117	0.141057	-1.95749	0.0502899	0.574186	Coding
Pim1	767.17	0.576382	0.294582	1.95661	0.0503934	0.574186	Coding
Hist1h1c	507.06	0.139004	0.0711243	1.95438	0.0506564	0.5757	Coding
Klf13	566.225	0.174063	0.0890978	1.95361	0.0507468	0.576056	Coding
Gm13680	46.1845	-0.354344	0.181516	-1.95214	0.0509215	0.576684	Predicted
Ptprc	2664.33	0.117062	0.0600347	1.94991	0.0511873	0.576684	Coding
Kif15	249.484	-0.24228	0.124268	-1.94966	0.0512161	0.576684	Coding
Izumo1r	89.0561	-0.4947	0.253387	-1.95235	0.0508964	0.576684	Coding
Ddx21	517.946	0.155293	0.0795886	1.9512	0.0510332	0.576684	Coding
Faf1	160.768	0.197464	0.101269	1.94989	0.0511888	0.576684	Coding
Sntb2	113.916	0.288257	0.147756	1.9509	0.0510684	0.576684	Coding
Churc1	510.819	0.129214	0.0663388	1.94778	0.0514407	0.578545	Coding
Prmt6	49.0044	0.347444	0.17846	1.9469	0.0515471	0.579073	Coding
Fam32a	455.36	0.152451	0.078534	1.94121	0.0522324	0.58108	Coding
Gbp10	33.5045	0.510578	0.262911	1.94202	0.0521346	0.58108	Coding
Rpsa-ps12	61.6103	-0.414316	0.213091	-1.94432	0.0518571	0.58108	Noncoding
Klf3	61.1469	0.628135	0.323619	1.94097	0.0522621	0.58108	Coding
Traf4	139.045	-0.24397	0.125663	-1.94146	0.052203	0.58108	Coding
Cib1	275.607	0.164794	0.0848157	1.94297	0.0520202	0.58108	Coding
Plekha3	151.06	-0.195818	0.100833	-1.94201	0.0521355	0.58108	Coding
Fam114a2	166.707	-0.201704	0.10378	-1.94357	0.0519473	0.58108	Coding
Gm16238	34.3177	-0.391598	0.201398	-1.9444	0.0518468	0.58108	Predicted
Zcchc6	307.258	0.16736	0.0863964	1.93712	0.0527312	0.582973	Coding
Fbxo8	67.3704	0.320272	0.16531	1.93741	0.0526957	0.582973	Coding
Usf3	80.1753	-0.275997	0.142458	-1.93739	0.0526978	0.582973	Coding
Abhd8	155.11	0.272348	0.14059	1.93718	0.0527237	0.582973	Coding
Scpep1	60.7729	0.380651	0.196353	1.9386	0.0525497	0.582973	Coding
Fance	51.1622	0.341972	0.176918	1.93294	0.0532439	0.587309	Coding
Chd2	181.773	0.197728	0.102283	1.93314	0.0532191	0.587309	Coding
Lrrfip2	156.858	-0.211997	0.109744	-1.93174	0.0533921	0.588278	Coding
Gm8724	16.6661	-0.562122	0.291221	-1.93023	0.0535787	0.589012	Predicted
Avl9	52.4306	0.361301	0.187181	1.93022	0.0535795	0.589012	Coding
Kat2a	38.6533	-0.378699	0.196333	-1.92886	0.0537482	0.590201	Coding
Pgm3	50.1818	-0.33678	0.174656	-1.92825	0.0538238	0.590366	Coding
Pde4d	266.679	0.252618	0.131048	1.92768	0.0538954	0.590487	Coding
Ell2	62.8167	0.342676	0.177891	1.92633	0.0540634	0.590738	Coding
Il2	167.642	1.76253	0.915111	1.92603	0.0541	0.590738	Coding
Bak1	232.388	0.178037	0.0923954	1.92691	0.0539914	0.590738	Coding
Asb8	87.8335	0.25013	0.129919	1.92528	0.0541944	0.591107	Coding
Fam168a	123.345	-0.259928	0.135119	-1.92369	0.054393	0.591444	Coding
Sdf4	2738.99	-0.189871	0.0987073	-1.92358	0.0544073	0.591444	Coding
H3f3a	5669.53	-0.0729063	0.0378842	-1.92445	0.0542977	0.591444	Coding
Gm43753	19.4981	0.528546	0.275077	1.92145	0.054675	0.591716	Predicted
Xcl1	2514.92	-0.571409	0.297319	-1.92187	0.054622	0.591716	Coding
St14	69.107	-0.302566	0.157428	-1.92193	0.0546143	0.591716	Coding
4930453N24Rik	386.638	0.172782	0.0898752	1.92247	0.0545472	0.591716	Coding
Atox1	1066.34	0.105677	0.0550201	1.9207	0.0547697	0.592083	Coding
H3f3b	8401.7	0.201115	0.104813	1.9188	0.0550091	0.5922	Coding
Eif3f	3747.65	-0.100139	0.0521937	-1.9186	0.0550346	0.5922	Coding
Gnb4	45.5539	-0.39497	0.205905	-1.91821	0.0550841	0.5922	Coding
AA467197	397.827	0.476321	0.248204	1.91907	0.0549751	0.5922	Coding
Plod3	47.5696	-0.33843	0.176422	-1.9183	0.055073	0.5922	Coding
Tomm20	1553.71	0.098598	0.0514301	1.91713	0.0552218	0.592374	Coding
Rps27a-ps2	27.067	-0.435726	0.227273	-1.91719	0.0552135	0.592374	Ribosomal
Vps16	104.83	0.260657	0.136163	1.9143	0.0555818	0.593527	Coding
Rpl13-ps3	29.8309	-0.46741	0.244012	-1.91552	0.0554258	0.593527	Ribosomal
Klf2	835.567	0.663689	0.346712	1.91424	0.0555899	0.593527	Coding
Il18r1	886.376	-0.228662	0.119475	-1.91389	0.0556336	0.593527	Coding
AC129085.2	37.1538	0.499562	0.260865	1.91503	0.0554891	0.593527	Noncoding
Rps11-ps2	195.297	-0.198755	0.103971	-1.91164	0.0559223	0.594674	Ribosomal
Cchcr1	27.494	-0.467784	0.244705	-1.91163	0.0559241	0.594674	Coding
Tatdn3	20.5787	0.512103	0.267847	1.91192	0.0558859	0.594674	Coding
Ufl1	148.09	-0.234274	0.122621	-1.91055	0.0560623	0.594828	Coding
Prdx2	743.877	-0.134776	0.0705324	-1.91084	0.0560254	0.594828	Coding
Pacsin1	70.1891	-0.384918	0.201518	-1.91009	0.0561216	0.594828	Coding
Dleu2	294.08	0.211305	0.110685	1.90905	0.0562551	0.595596	Noncoding
mt-Nd4l	31.6129	-0.392694	0.206569	-1.90103	0.0572975	0.595637	Mitochondrial
Cdca7l	134.958	-0.284779	0.149745	-1.90176	0.0572027	0.595637	Coding
Slfn8	148.753	0.307652	0.161264	1.90775	0.056423	0.595637	Coding
AC132336.1	27.8529	0.519673	0.273218	1.90205	0.0571652	0.595637	Noncoding
Slfn2	1178.15	0.425066	0.22345	1.90229	0.0571339	0.595637	Coding
Fpgs	23.6302	-0.478448	0.250926	-1.90673	0.0565557	0.595637	Coding
Pmpcb	155.478	-0.239358	0.125655	-1.90488	0.0567954	0.595637	Coding
Abracl	2516.45	0.133151	0.0699211	1.90431	0.0568701	0.595637	Coding
Usp34	345.74	-0.147746	0.0775514	-1.90513	0.0567629	0.595637	Coding
Hccs	222.954	0.216557	0.113908	1.90116	0.0572805	0.595637	Coding
Gm11810	42.8803	-0.360983	0.189716	-1.90276	0.0570721	0.595637	Predicted
Cenpb	242.981	0.19842	0.103989	1.90809	0.0563799	0.595637	Coding
Gm42685	24.0239	0.575042	0.302224	1.9027	0.05708	0.595637	Predicted
Atp8b4	252.339	0.184086	0.0965264	1.9071	0.0565072	0.595637	Coding
Tmem256	730.125	-0.160488	0.0843371	-1.90293	0.0570492	0.595637	Coding
Dopey2	60.4646	0.325788	0.171148	1.90354	0.0569699	0.595637	Coding
Ankrd46	99.3557	-0.29262	0.153701	-1.90383	0.0569325	0.595637	Coding
Gm20186	83.154	0.362665	0.190916	1.89961	0.0574845	0.595712	Predicted
Plac8	3001.03	0.521018	0.274197	1.90016	0.0574118	0.595712	Coding
Arhgap1	95.9166	0.26893	0.141573	1.89958	0.0574879	0.595712	Coding
Ahi1	120.629	-0.227195	0.119712	-1.89784	0.0577165	0.597446	Coding
Adrb2	33.9672	0.400661	0.211444	1.89488	0.058108	0.60086	Coding
Eomes	121.58	0.464675	0.24533	1.89409	0.0582136	0.601315	Coding
Rps6-ps3	50.8535	-0.315681	0.166813	-1.89243	0.0584339	0.602224	Ribosomal
Fam107b	894.983	0.165187	0.0873023	1.89213	0.0584737	0.602224	Coding
Rnf111	199.938	0.180914	0.0956188	1.89203	0.058487	0.602224	Coding
Serpine2	233.898	0.765257	0.404607	1.89136	0.0585764	0.602509	Coding
Ltn1	78.5769	0.26451	0.140001	1.88935	0.0588451	0.604635	Coding
Cst3	1347.13	-0.168483	0.0892207	-1.88838	0.0589746	0.605328	Coding
Cd101	35.6065	-0.408806	0.217002	-1.88388	0.059581	0.610909	Coding
Gm5566	23.9781	-0.539202	0.286358	-1.88296	0.0597053	0.61154	Predicted
Bcl3	82.6231	0.267957	0.142396	1.88177	0.0598666	0.612549	Coding
Sfpq	769.254	-0.161423	0.0858543	-1.8802	0.0600808	0.614097	Coding
Slc15a3	29.2729	0.474443	0.252504	1.87895	0.0602511	0.615192	Coding
Ptger4	85.5683	0.284363	0.151636	1.8753	0.0607511	0.616425	Coding
Tmem170b	48.5328	-0.373716	0.199213	-1.87596	0.0606611	0.616425	Coding
Psmd3	270.832	0.199687	0.106392	1.87689	0.0605333	0.616425	Coding
Psme2	1898.86	0.114663	0.0611241	1.8759	0.0606691	0.616425	Coding
Rps10	16847.2	-0.0766713	0.0408707	-1.87595	0.0606624	0.616425	Ribosomal
Ddx28	63.1951	0.332118	0.177081	1.87551	0.0607222	0.616425	Coding
Chd7	416.197	0.155222	0.08283	1.87398	0.0609327	0.616427	Coding
Arl15	23.7963	0.514433	0.274656	1.87301	0.0610674	0.616427	Coding
Dstn	105.705	0.230264	0.122895	1.87366	0.060977	0.616427	Coding
Nrip1	220.135	0.200383	0.106933	1.87391	0.0609434	0.616427	Coding
Rassf2	56.1239	0.305163	0.162894	1.87339	0.0610149	0.616427	Coding
Gcc2	164.618	0.22692	0.121294	1.87083	0.0613685	0.618826	Coding
AC153368.1	103.545	-0.248385	0.132837	-1.86985	0.0615051	0.619562	Noncoding
Snhg8	630.744	-0.11937	0.0638616	-1.8692	0.0615953	0.61976	Noncoding
Rap1a	1795.91	-0.142658	0.0763372	-1.86879	0.0616519	0.61976	Coding
Mt3	73.0892	0.486315	0.260344	1.86797	0.0617665	0.620172	Coding
Mrpl30	660.675	0.122964	0.0658414	1.86758	0.06182	0.620172	Coding
Pde3b	271.249	0.229778	0.123261	1.86415	0.0623003	0.624347	Coding
Myo1e	50.0747	-0.444022	0.238314	-1.86318	0.0624364	0.625069	Coding
Txnrd1	107.674	0.284571	0.152891	1.86127	0.0627066	0.62713	Coding
Kmt2a	502.967	-0.13359	0.0718029	-1.86052	0.0628125	0.627154	Coding
Smurf1	27.2882	0.424285	0.228068	1.86034	0.0628376	0.627154	Coding
Zfp707	38.3585	0.371137	0.199581	1.85958	0.0629444	0.627578	Coding
Emp1	60.0181	0.386867	0.208105	1.859	0.063027	0.627759	Coding
Rap2a	210.525	0.291928	0.157082	1.85844	0.0631067	0.627912	Coding
Isg20	332.743	-0.245425	0.132213	-1.85629	0.0634122	0.629026	Coding
Cbarp	33.8796	-0.462631	0.249193	-1.85652	0.0633792	0.629026	Coding
Eif3h	5367.74	-0.121326	0.0653319	-1.85707	0.0633014	0.629026	Coding
Gm15421	142.051	-0.236607	0.127551	-1.85499	0.063597	0.630217	Predicted
Sh3bp1	321.363	-0.150606	0.0812111	-1.8545	0.0636674	0.630275	Coding
Bad	132.959	-0.207977	0.11221	-1.85346	0.0638161	0.630467	Coding
Aars	84.2129	0.250161	0.134951	1.85371	0.0637803	0.630467	Coding
Hikeshi	378.094	-0.133155	0.0718999	-1.85195	0.0640328	0.631329	Coding
H2afy	1700.29	0.0889267	0.0480119	1.85218	0.0639999	0.631329	Coding
Nt5m	65.405	0.268537	0.145128	1.85035	0.0642638	0.632327	Coding
Pced1b	66.3124	0.309577	0.167269	1.85077	0.0642021	0.632327	Coding
Dusp1	480.495	-0.206422	0.11159	-1.84983	0.0643385	0.632424	Coding
Stard10	96.4672	0.311005	0.168169	1.84937	0.0644051	0.632441	Coding
Gm7565	19.6747	-0.571977	0.309424	-1.84852	0.064527	0.632716	Predicted
Fbxl3	140.412	0.204155	0.110457	1.84827	0.0645628	0.632716	Coding
Lyrm9	179.38	-0.21993	0.119156	-1.84574	0.0649304	0.633483	Coding
Kcnmb4	19.7464	-0.610798	0.331047	-1.84505	0.0650309	0.633483	Coding
Ftl1	4325.76	0.134726	0.0729813	1.84603	0.0648875	0.633483	Coding
Zkscan3	130.223	-0.243647	0.132034	-1.84534	0.0649878	0.633483	Coding
Babam1	190.775	0.198386	0.107505	1.84537	0.0649838	0.633483	Coding
Eps15	136.496	-0.195756	0.106052	-1.84585	0.0649138	0.633483	Coding
D8Ertd738e	1188.85	0.107066	0.0581115	1.84242	0.0654141	0.635361	Coding
Sumo3	274.212	-0.179452	0.0974256	-1.84194	0.0654844	0.635361	Coding
2210013O21Rik	131.472	-0.23062	0.125153	-1.8427	0.0653728	0.635361	Coding
Il3	41.9548	2.86731	1.55646	1.8422	0.0654464	0.635361	Coding
2310031A07Rik	57.592	0.841582	0.457182	1.8408	0.0656507	0.636342	Noncoding
Swt1	201.645	0.206426	0.112187	1.84001	0.0657663	0.63683	Coding
Dynlrb1	542.457	0.136836	0.0744337	1.83837	0.0660086	0.637277	Coding
Tnfsf8	94.9082	-0.7983	0.434162	-1.83871	0.0659574	0.637277	Coding
Ech1	765.058	-0.191114	0.103953	-1.83847	0.065993	0.637277	Coding
AC132474.4	23.5549	-0.453961	0.247171	-1.83662	0.0662657	0.637396	Noncoding
Rpp25l	192.749	0.173524	0.0944857	1.83651	0.0662824	0.637396	Coding
Sh3bgrl	415.916	-0.186413	0.101501	-1.83657	0.066273	0.637396	Coding
Sfmbt1	39.4968	-0.358776	0.195258	-1.83745	0.0661439	0.637396	Coding
Ifi47	745.068	0.199904	0.10889	1.83584	0.0663817	0.637722	Coding
AC153546.1	17.4249	-0.573782	0.312771	-1.83451	0.0665779	0.638978	Noncoding
Prss2	158.946	1.90541	1.03895	1.83398	0.0666575	0.639113	Coding
Trnt1	264.777	0.169575	0.0925033	1.83318	0.066776	0.63962	Coding
2810006K23Rik	50.8468	-0.338982	0.184971	-1.83263	0.0668583	0.639779	Coding
A130048G24Rik	69.9346	0.287496	0.157174	1.82915	0.0673767	0.641756	Noncoding
Iffo2	42.3898	-0.361324	0.197387	-1.83053	0.06717	0.641756	Coding
Samd1	85.095	-0.316661	0.173027	-1.83013	0.0672312	0.641756	Coding
Gins4	171.595	-0.199803	0.109205	-1.82961	0.0673078	0.641756	Coding
Snx20	181.188	0.290475	0.158813	1.82904	0.0673939	0.641756	Coding
S100a11	2941.78	-0.223562	0.122284	-1.82822	0.0675168	0.642299	Coding
AI506816	55.0776	0.333879	0.182677	1.8277	0.0675944	0.642411	Noncoding
Plekhm1	25.2694	0.458594	0.251217	1.82549	0.0679273	0.642416	Coding
Rabep1	260.087	-0.195233	0.10685	-1.82717	0.0676735	0.642416	Coding
Srrm2	1627.77	-0.0799827	0.043941	-1.82023	0.0687242	0.642416	Coding
Fam133b	315.792	-0.169361	0.0929081	-1.82288	0.0683213	0.642416	Coding
Abcd3	40.7491	-0.394093	0.216126	-1.82344	0.0682372	0.642416	Coding
Cdk13	215.923	-0.168163	0.092306	-1.8218	0.0684854	0.642416	Coding
Picalm	394.895	0.169424	0.0930976	1.81986	0.0687809	0.642416	Coding
Ptpn18	3136.32	0.1323	0.072627	1.82164	0.0685096	0.642416	Coding
4933434E20Rik	270.4	0.196138	0.107515	1.82428	0.0681095	0.642416	Coding
Itgal	996.071	0.183205	0.100649	1.82024	0.0687232	0.642416	Coding
S100a10	6033.14	0.171449	0.0939691	1.82453	0.0680724	0.642416	Coding
Ptpn1	691.347	-0.132063	0.0725153	-1.82118	0.0685801	0.642416	Coding
Klhdc2	155.308	-0.213873	0.117317	-1.82304	0.068298	0.642416	Coding
Arv1	18.4359	0.528278	0.290133	1.82081	0.0686351	0.642416	Coding
Stat5a	90.5508	0.295866	0.162268	1.82332	0.0682554	0.642416	Coding
Rnaset2a	406.565	-0.175564	0.0963411	-1.82232	0.0684071	0.642416	Coding
Tcf20	106.322	0.239704	0.131389	1.82438	0.0680943	0.642416	Coding
Rps6-ps1	17.8133	-0.522758	0.286721	-1.82323	0.0682693	0.642416	Ribosomal
Arap3	17.4777	-0.980252	0.53886	-1.81912	0.0688929	0.642846	Coding
Eif2b5	99.7856	0.245398	0.134987	1.81794	0.0690738	0.643918	Coding
Eif2ak3	56.7888	0.310492	0.170957	1.8162	0.0693398	0.645164	Coding
Fam204a	337.387	0.165211	0.09095	1.8165	0.0692938	0.645164	Coding
Gm20274	21.5094	0.497036	0.273877	1.81481	0.0695527	0.646528	Predicted
Hps5	41.9535	-0.340966	0.188061	-1.81307	0.0698218	0.647824	Coding
Evl	550.594	-0.158422	0.0873789	-1.81304	0.0698249	0.647824	Coding
Edaradd	20.2954	0.559226	0.308584	1.81224	0.0699497	0.647888	Coding
Gm43672	25.5229	0.427319	0.235917	1.81131	0.0700926	0.647888	Predicted
Prex1	131.017	0.274891	0.151763	1.81132	0.0700915	0.647888	Coding
Fbxo22	157.26	-0.21248	0.117328	-1.81099	0.0701427	0.647888	Coding
Clca3a1	53.5903	0.304242	0.168011	1.81085	0.070164	0.647888	Coding
Sema4f	18.6981	0.518694	0.286511	1.81038	0.0702373	0.647951	Coding
Gm38062	294.325	0.226939	0.125446	1.80906	0.0704414	0.648606	Predicted
Eif1a	285.301	0.153504	0.0848506	1.80911	0.0704346	0.648606	Coding
Phf11a	61.3191	0.331185	0.183368	1.80612	0.0709001	0.651599	Coding
Cxcr3	235.036	0.696865	0.385832	1.80614	0.0708971	0.651599	Coding
Pias1	109.987	0.233282	0.129195	1.80566	0.0709715	0.651641	Coding
Lpin1	22.1935	0.519527	0.287989	1.80398	0.0712348	0.652216	Coding
Rb1cc1	218.106	0.172136	0.0954187	1.804	0.0712311	0.652216	Coding
Mrps15	383.263	0.136149	0.0754711	1.80399	0.0712334	0.652216	Coding
Zfyve21	28.9884	-0.440762	0.244498	-1.80272	0.0714321	0.65341	Coding
Kdm3a	78.6511	0.271937	0.150996	1.80096	0.0717092	0.654716	Coding
Cbx3	1206.21	-0.137343	0.0762485	-1.80125	0.0716631	0.654716	Coding
Cmah	38.9427	0.688963	0.383059	1.79858	0.0720845	0.655539	Coding
Pspc1	178.44	0.178223	0.0991016	1.79838	0.0721163	0.655539	Coding
Kdm6b	210.005	0.555607	0.30884	1.79901	0.0720173	0.655539	Coding
Cnp	357.137	0.146475	0.0814535	1.79826	0.0721356	0.655539	Coding
Gadd45b	731.47	0.628605	0.349509	1.79854	0.0720922	0.655539	Coding
Dusp5	785.312	0.461728	0.257103	1.79589	0.0725128	0.658354	Coding
Cdkn2a	99.4594	-0.467296	0.260318	-1.7951	0.0726378	0.658406	Coding
Rasgrp2	83.8377	0.863503	0.48106	1.795	0.0726535	0.658406	Coding
Sgk1	217.231	0.261378	0.145759	1.79322	0.0729372	0.660363	Coding
Naa35	107.096	-0.252448	0.140954	-1.79099	0.0732942	0.662979	Coding
Slc25a51	87.8271	0.239259	0.133814	1.78799	0.0737769	0.664016	Coding
Ctr9	97.7181	-0.245397	0.137238	-1.78811	0.0737585	0.664016	Coding
Gm12216	34.7403	0.393047	0.219763	1.78851	0.0736944	0.664016	Predicted
Depdc1b	16.6509	0.536073	0.29986	1.78774	0.0738174	0.664016	Coding
Asnsd1	362.685	-0.15193	0.0849302	-1.78888	0.0736348	0.664016	Coding
Gm14227	19.3614	-0.494047	0.276276	-1.78823	0.0737382	0.664016	Predicted
Rpl10a	10512.7	-0.0982633	0.0550354	-1.78546	0.0741874	0.666538	Ribosomal
Slc38a6	61.6865	-0.414357	0.232275	-1.7839	0.0744396	0.666538	Coding
Casp3	795.491	-0.161684	0.0905923	-1.78474	0.0743034	0.666538	Coding
Chst12	185.612	-0.273734	0.153424	-1.78417	0.0743955	0.666538	Coding
Isyna1	214.86	-0.169325	0.0948669	-1.78487	0.0742824	0.666538	Coding
Katnb1	70.1024	0.308744	0.173558	1.77891	0.0752549	0.666574	Coding
Prcc	50.0114	-0.328189	0.184072	-1.78294	0.0745953	0.666574	Coding
Gm37082	77.9578	0.266671	0.149905	1.77893	0.0752519	0.666574	Predicted
Il2ra	267.699	0.28896	0.162442	1.77885	0.0752638	0.666574	Coding
Cox20	609.133	-0.163483	0.0916742	-1.78331	0.0745363	0.666574	Coding
Ostf1	2942.51	0.0892244	0.0500952	1.7811	0.0748969	0.666574	Coding
Prpsap1	162.554	-0.182062	0.102344	-1.77892	0.0752521	0.666574	Coding
Ahdc1	42.8262	-0.402773	0.226164	-1.78089	0.074931	0.666574	Coding
Hif1an	33.1591	0.425331	0.238843	1.7808	0.0749452	0.666574	Coding
Ppic	137.746	-0.286938	0.161083	-1.7813	0.0748632	0.666574	Coding
Cmss1	34.8295	0.383083	0.215154	1.78051	0.0749929	0.666574	Coding
Otulin	524.591	0.117976	0.0662558	1.78061	0.0749765	0.666574	Coding
Cd84	401.744	0.195639	0.110462	1.77109	0.0765454	0.666798	Coding
Ttll3	22.3735	0.440067	0.248586	1.77028	0.0766804	0.666798	Coding
Atp5j	2366.33	-0.0931844	0.0525903	-1.77189	0.0764123	0.666798	Coding
Dhrs13	25.9669	-0.422917	0.238163	-1.77575	0.0757745	0.666798	Coding
Zfp60	18.6745	-0.522016	0.294091	-1.77501	0.0758955	0.666798	Coding
Tnfsf10	249.568	-0.293069	0.164894	-1.77731	0.0755165	0.666798	Coding
1700020L24Rik	17.6358	0.570398	0.321277	1.77541	0.0758307	0.666798	Coding
Uros	19.0139	-0.483177	0.272067	-1.77595	0.0757411	0.666798	Coding
Tor1aip1	311.657	0.148262	0.0835989	1.77349	0.0761468	0.666798	Coding
Ap1s2	151.598	-0.21178	0.119617	-1.77048	0.0766465	0.666798	Coding
Mxd1	186.757	0.336854	0.190135	1.77166	0.0764511	0.666798	Coding
Pdss2	20.8979	-0.480078	0.270751	-1.77314	0.0762058	0.666798	Coding
a	125.489	-0.424178	0.239445	-1.7715	0.0764774	0.666798	Coding
Slc25a20	70.1973	0.264117	0.148859	1.77428	0.0760174	0.666798	Coding
Abl1	45.61	-0.316777	0.178835	-1.77134	0.0765044	0.666798	Coding
Rab11fip4	34.3149	0.379225	0.213712	1.77447	0.0759861	0.666798	Coding
Irf7	149.856	0.331994	0.187487	1.77075	0.0766016	0.666798	Coding
Ubiad1	17.6792	0.497224	0.280141	1.7749	0.0759138	0.666798	Coding
Imp3	418.298	0.124781	0.070469	1.77072	0.0766081	0.666798	Coding
Adam8	133.357	0.64685	0.364594	1.77417	0.0760358	0.666798	Coding
Tnfsf11	149.415	-0.594564	0.33591	-1.77001	0.0767251	0.666798	Coding
Tmem222	119.718	0.211608	0.119591	1.76942	0.0768232	0.667055	Coding
Fbxl12	124.726	0.210983	0.119345	1.76784	0.077088	0.66706	Coding
Upf3b	267.117	0.159865	0.0904744	1.76696	0.0772342	0.66706	Coding
Fam118b	60.5841	-0.275882	0.155975	-1.76876	0.0769346	0.66706	Coding
0610009L18Rik	17.8732	0.486884	0.275547	1.76697	0.0772326	0.66706	Noncoding
Slc7a5	111.205	0.261994	0.148175	1.76814	0.077038	0.66706	Coding
Mad2l2	118.62	0.218853	0.123818	1.76755	0.0771369	0.66706	Coding
Ric8a	182.133	0.164483	0.0931457	1.76586	0.0774187	0.668062	Coding
Aspscr1	98.0554	0.215225	0.121952	1.76483	0.0775928	0.668132	Coding
Ablim1	937.263	0.0983615	0.0557448	1.7645	0.0776485	0.668132	Coding
Cd80	52.0811	0.361928	0.205153	1.76418	0.0777009	0.668132	Coding
Mad2l1bp	129.644	0.208985	0.118382	1.76534	0.0775066	0.668132	Coding
Atp5l	564.012	0.11153	0.0632578	1.76311	0.0778827	0.668516	Coding
Vcl	49.978	-0.3456	0.195992	-1.76334	0.077843	0.668516	Coding
Adora2a	151.936	0.249146	0.142016	1.75435	0.0793698	0.668938	Coding
Podnl1	45.6344	0.479186	0.273174	1.75414	0.0794068	0.668938	Coding
Snrpd3	730.055	0.14355	0.0818088	1.7547	0.0793103	0.668938	Coding
Tbc1d15	147.53	0.195525	0.111152	1.75908	0.0785636	0.668938	Coding
Jagn1	124.699	-0.20593	0.117076	-1.75894	0.0785875	0.668938	Coding
Trav7-3	29.7877	-1.33487	0.761273	-1.75347	0.0795218	0.668938	Coding
Pycard	534.333	0.147182	0.0835495	1.76162	0.0781341	0.668938	Coding
Areg	304.659	-1.05762	0.603006	-1.75392	0.0794443	0.668938	Coding
Pja1	122.967	0.255882	0.145473	1.75897	0.0785828	0.668938	Coding
Pik3ip1	46.2628	0.534386	0.303836	1.7588	0.0786115	0.668938	Coding
Xpr1	84.4922	-0.2311	0.131826	-1.75307	0.0795896	0.668938	Coding
Ly6e	1607.62	0.170557	0.0972611	1.7536	0.0794997	0.668938	Coding
Gm38014	36.4264	0.354276	0.201871	1.75497	0.0792651	0.668938	Predicted
Cfl1	6176.48	0.0726046	0.0412233	1.76125	0.0781959	0.668938	Coding
Stard5	33.0745	0.426182	0.243046	1.7535	0.0795156	0.668938	Coding
Gpr171	474.648	0.223252	0.126776	1.76099	0.0782398	0.668938	Coding
Slc37a3	63.6603	0.285614	0.162247	1.76037	0.0783455	0.668938	Coding
Ptpn4	65.0355	0.269397	0.153237	1.75804	0.0787407	0.668938	Coding
Tomm7	2225.25	-0.0808576	0.0460055	-1.75757	0.0788215	0.668938	Coding
Dnajc13	111.323	0.232786	0.132478	1.75716	0.0788904	0.668938	Coding
Phxr4	87.9501	0.263155	0.15007	1.75355	0.0795079	0.668938	Noncoding
Rnf38	71.458	0.26181	0.149372	1.75274	0.0796469	0.668938	Coding
Slc2a3	317.278	0.243428	0.138781	1.75404	0.0794235	0.668938	Coding
Laptm5	3635.43	0.143874	0.08176	1.75971	0.0784568	0.668938	Coding
Cpox	105.875	-0.218644	0.124603	-1.75473	0.0793056	0.668938	Coding
Nmral1	79.4212	-0.253717	0.144823	-1.75192	0.0797883	0.669549	Coding
Ncbp2	238.211	-0.153999	0.087955	-1.75088	0.0799658	0.669885	Coding
Tmem106c	55.7068	-0.295074	0.168514	-1.75104	0.0799392	0.669885	Coding
Ubash3a	110.647	0.222742	0.127265	1.75022	0.0800811	0.670276	Coding
Cuedc2	310.416	-0.164415	0.0939756	-1.74955	0.0801964	0.670664	Coding
Rela	155.053	0.183271	0.104803	1.74873	0.0803384	0.670702	Coding
Gm42047	90.5205	0.367852	0.21035	1.74876	0.0803324	0.670702	Predicted
Cycs	1514.24	0.130027	0.0744002	1.74767	0.0805208	0.67165	Coding
Atp5e	5780.92	-0.0811253	0.0464483	-1.74657	0.0807116	0.672665	Coding
Snrpg	1915.27	-0.0809554	0.046376	-1.74563	0.0808753	0.673455	Coding
Racgap1	226.497	0.197906	0.113406	1.7451	0.0809668	0.673464	Coding
Ddx24	684.789	0.135524	0.0776718	1.74483	0.0810146	0.673464	Coding
Pigk	137.501	-0.211124	0.121048	-1.74413	0.0811356	0.673483	Coding
Smap2	617.13	0.194549	0.111552	1.74402	0.081155	0.673483	Coding
Atl2	56.8841	0.314852	0.180615	1.74323	0.0812941	0.673491	Coding
Rcn2	108.833	-0.238047	0.136553	-1.74326	0.0812886	0.673491	Coding
Thyn1	193.697	0.158662	0.09122	1.73933	0.0819766	0.67456	Coding
Card19	282.837	-0.184095	0.105806	-1.73993	0.0818707	0.67456	Coding
Cd72	27.6873	-0.603985	0.34718	-1.73969	0.081914	0.67456	Coding
2020-09-01	1468.45	0.125262	0.0719283	1.74148	0.0815996	0.67456	Coding
Glb1	80.6397	-0.343856	0.197671	-1.73953	0.0819409	0.67456	Coding
Tox	338.538	-0.485648	0.279052	-1.74035	0.0817972	0.67456	Coding
Abcb1b	112.126	0.253499	0.145577	1.74133	0.0816251	0.67456	Coding
Iqsec1	114.844	-0.209493	0.120421	-1.73966	0.081918	0.67456	Coding
Tyms	319.691	-0.185502	0.106771	-1.73738	0.0823208	0.676821	Coding
Rsbn1l	525.943	0.126362	0.0728339	1.73494	0.0827519	0.676851	Coding
Psmd4	858.467	0.100563	0.0579173	1.73632	0.0825073	0.676851	Coding
Tmem181b-ps	33.6666	-0.379022	0.218506	-1.73461	0.0828103	0.676851	Noncoding
Paxbp1	135.414	-0.247411	0.142582	-1.73523	0.0827007	0.676851	Coding
Mfng	201.84	-0.182593	0.105199	-1.7357	0.0826166	0.676851	Coding
AC117245.3	45.9727	-0.568084	0.327461	-1.73482	0.0827734	0.676851	Noncoding
Icam1	183.286	0.225486	0.129886	1.73603	0.0825578	0.676851	Coding
Pigp	310.691	-0.184183	0.106323	-1.7323	0.0832202	0.679631	Coding
Gsap	53.2165	0.301913	0.174453	1.73063	0.0835181	0.681494	Coding
1700056E22Rik	18.3245	0.518151	0.299509	1.73	0.08363	0.681836	Coding
Coro1c	121.617	0.197815	0.11462	1.72584	0.0843759	0.685609	Coding
Upf2	170.09	-0.182366	0.105817	-1.72342	0.0848135	0.685609	Coding
Smdt1	1194.91	0.090835	0.0527011	1.72359	0.084782	0.685609	Coding
Plp2	613.055	-0.14328	0.0832532	-1.72101	0.0852485	0.685609	Coding
1700052K11Rik	36.9623	-0.352956	0.204462	-1.72626	0.0843002	0.685609	Noncoding
Pik3r5	45.3541	0.357301	0.20737	1.72301	0.0848862	0.685609	Coding
Alkbh3	121.6	0.205358	0.119352	1.72061	0.0853209	0.685609	Coding
Ildr1	16.548	0.531585	0.308732	1.72183	0.0850999	0.685609	Coding
Ndnf	23.0697	0.589743	0.342784	1.72045	0.0853507	0.685609	Coding
Ncapd2	72.3735	0.285588	0.165732	1.7232	0.0848526	0.685609	Coding
Arrb2	310.709	0.147228	0.0854594	1.72278	0.0849284	0.685609	Coding
Myd88	97.0147	0.231252	0.134414	1.72045	0.0853508	0.685609	Coding
Rpl34	21627.8	-0.0851556	0.0494974	-1.72041	0.0853583	0.685609	Ribosomal
Ncf1	24.0859	-0.536365	0.311012	-1.72458	0.0846029	0.685609	Coding
Mrps27	40.7556	-0.327224	0.19013	-1.72106	0.0852406	0.685609	Coding
Gtf2ird1	22.582	-0.579795	0.33646	-1.72322	0.0848485	0.685609	Coding
Cyb5a	603.984	-0.130699	0.0757278	-1.7259	0.0843657	0.685609	Coding
Vapa	663.181	-0.0984229	0.0571835	-1.72118	0.0852191	0.685609	Coding
Pwwp2a	82.6794	0.231211	0.134515	1.71884	0.0856427	0.686197	Coding
Dtnbp1	197.438	-0.25943	0.150904	-1.71917	0.0855829	0.686197	Coding
Cox7a2l	2487.03	-0.12097	0.0703683	-1.71909	0.0855979	0.686197	Coding
Id2	4778.93	0.239322	0.139267	1.71844	0.0857156	0.686217	Coding
Slc35a1	88.9637	-0.248515	0.144693	-1.71754	0.0858812	0.686416	Coding
Zwint	212.34	0.178151	0.103724	1.71755	0.0858787	0.686416	Coding
Tmed4	102.773	-0.215366	0.125579	-1.71498	0.086349	0.68786	Coding
Smg7	127.048	0.204299	0.119098	1.71538	0.0862758	0.68786	Coding
Jade1	124.646	-0.189714	0.110744	-1.71309	0.0866967	0.68786	Coding
Snrnp48	227.299	-0.151155	0.0881817	-1.71413	0.0865048	0.68786	Coding
Decr1	54.9926	-0.313934	0.18313	-1.71427	0.086479	0.68786	Coding
A530010L16Rik	23.3973	-0.458596	0.267699	-1.7131	0.0866938	0.68786	Noncoding
Acap3	26.4527	0.401212	0.234133	1.7136	0.0866017	0.68786	Coding
Eif3m	1369.56	-0.0913069	0.0532439	-1.71488	0.0863672	0.68786	Coding
Osbp	96.4271	0.227197	0.132575	1.71372	0.0865796	0.68786	Coding
Gm38380	84.6081	0.30963	0.1808	1.71255	0.086795	0.68808	Predicted
Vegfb	67.5576	-0.308196	0.180013	-1.71207	0.0868832	0.68822	Coding
Hook3	156.981	-0.201688	0.117888	-1.71085	0.0871087	0.688689	Coding
Gm1821	57.2326	0.280265	0.163876	1.71022	0.0872249	0.688689	Predicted
Slc41a1	55.4028	0.40191	0.234965	1.71051	0.0871716	0.688689	Coding
Dus2	43.831	0.337959	0.197565	1.71062	0.0871513	0.688689	Coding
Cdca7	108.707	-0.340133	0.199104	-1.70832	0.0875777	0.690915	Coding
Rps11	25077.4	-0.0950064	0.0557284	-1.70481	0.0882295	0.695252	Ribosomal
Pitpnm2	80.7463	-0.288463	0.169227	-1.70459	0.0882702	0.695252	Coding
Rps9	20681.7	-0.0789012	0.046316	-1.70354	0.0884673	0.696055	Ribosomal
Shc1	90.9273	0.22288	0.130853	1.70328	0.0885149	0.696055	Coding
Atp6v0e2	23.0315	0.455349	0.267514	1.70215	0.0887267	0.697159	Coding
Etaa1	69.6179	0.276379	0.162465	1.70116	0.0889128	0.697497	Coding
Dut	1439.36	-0.118199	0.0694709	-1.70142	0.0888648	0.697497	Coding
Fkbp15	76.4382	0.252221	0.148344	1.70024	0.0890853	0.698289	Coding
Gm37558	71.3826	0.318985	0.187725	1.69921	0.0892792	0.698685	Predicted
Hspe1	2938.63	0.106739	0.062803	1.69958	0.0892108	0.698685	Coding
Tpx2	200.541	-0.203747	0.12065	-1.68874	0.0912689	0.698816	Coding
Zhx1	68.0654	0.260954	0.153701	1.69781	0.0895446	0.698816	Coding
Ptpn5	38.8014	-0.436486	0.258361	-1.68944	0.0911349	0.698816	Coding
Nr1d2	19.145	0.541747	0.320354	1.69109	0.0908195	0.698816	Coding
Prkch	340.46	-0.182198	0.107742	-1.69106	0.0908257	0.698816	Coding
Ptms	1682.79	-0.162083	0.0960016	-1.68834	0.0913461	0.698816	Coding
Arl6ip5	969.766	0.0933209	0.0551939	1.69078	0.0908787	0.698816	Coding
Stap1	270.423	-0.181057	0.106831	-1.69479	0.0901156	0.698816	Coding
Fam46a	423.69	0.267336	0.157925	1.6928	0.0904937	0.698816	Coding
Eif4g2	1126.71	0.0971256	0.0574478	1.69067	0.0908989	0.698816	Coding
Fyb	1240.14	0.133625	0.0791269	1.68875	0.0912679	0.698816	Coding
Tefm	22.0073	-0.492616	0.291567	-1.68955	0.0911143	0.698816	Coding
Pip5k1c	51.9641	0.321857	0.190618	1.68849	0.0913172	0.698816	Coding
Tagap	237.921	0.34632	0.204528	1.69326	0.0904053	0.698816	Coding
Hopx	755.275	0.261076	0.154286	1.69215	0.0906175	0.698816	Coding
Smim12	126.326	0.194334	0.114767	1.69329	0.0903994	0.698816	Coding
Dennd4a	263.956	0.214786	0.126714	1.69505	0.0900662	0.698816	Coding
Ltb	3506.85	-0.175338	0.103519	-1.69377	0.0903082	0.698816	Coding
Hacd3	127.851	-0.235319	0.138946	-1.69361	0.0903398	0.698816	Coding
Trip12	232.86	0.154643	0.0916025	1.68819	0.0913743	0.698816	Coding
Bcl6	25.8045	0.632673	0.374284	1.69036	0.0909596	0.698816	Coding
Tmub1	61.2191	0.275083	0.162451	1.69333	0.0903922	0.698816	Coding
Vapb	213.673	-0.162307	0.0960704	-1.68946	0.0911315	0.698816	Coding
Gm13921	70.119	-0.24251	0.14345	-1.69056	0.0909214	0.698816	Predicted
Pak2	976.688	-0.0986691	0.0583381	-1.69133	0.0907737	0.698816	Coding
Zfp1	64.0601	-0.305965	0.180814	-1.69215	0.0906167	0.698816	Coding
Glyr1	148.858	-0.189277	0.111501	-1.69754	0.0895951	0.698816	Coding
Ndufa6	1452.51	-0.102758	0.0605104	-1.69819	0.0894715	0.698816	Coding
Srf	69.4802	0.248997	0.147318	1.6902	0.0909895	0.698816	Coding
Crybg1	202.608	0.164114	0.0972724	1.68715	0.0915738	0.699794	Coding
Tmco3	31.6768	-0.397216	0.235528	-1.68649	0.0917014	0.700219	Coding
BC003965	198.697	-0.154439	0.091607	-1.68589	0.0918177	0.700559	Coding
Atp2b1	522.609	0.136651	0.0810873	1.68523	0.0919438	0.700973	Coding
Rps27a	21861.5	-0.078749	0.0467452	-1.68464	0.0920579	0.701294	Ribosomal
Gm6204	34.1112	-0.385721	0.229321	-1.68201	0.092566	0.704614	Predicted
St8sia1	20.6553	0.861926	0.513037	1.68005	0.0929483	0.704773	Coding
Gk	26.4404	-0.388987	0.231476	-1.68046	0.0928678	0.704773	Coding
Mettl23	250.663	-0.145374	0.0865046	-1.68053	0.092854	0.704773	Coding
Slc9a9	55.3338	0.278747	0.165914	1.68007	0.0929434	0.704773	Coding
Tnfsf9	119.351	0.315534	0.187771	1.68041	0.0928769	0.704773	Coding
Trafd1	167.273	0.186452	0.111012	1.67957	0.0930409	0.704927	Coding
Atp1b3	643.003	0.13494	0.0803692	1.679	0.0931527	0.705226	Coding
Rexo2	734.402	-0.168082	0.100224	-1.67706	0.0935316	0.705903	Coding
Vcp	635.639	0.135569	0.0808011	1.67781	0.0933848	0.705903	Coding
Nat6	19.6139	0.51401	0.30648	1.67714	0.0935149	0.705903	Coding
AC149090.1	850.871	-0.159089	0.0948557	-1.67717	0.0935093	0.705903	Coding
Desi1	241.172	-0.145937	0.0872069	-1.67346	0.0942366	0.710674	Coding
Ints7	71.3556	-0.312088	0.186543	-1.673	0.0943266	0.710802	Coding
Ube2n	948.173	-0.0864147	0.0516852	-1.67194	0.0945359	0.71183	Coding
Gm38329	28.8392	-0.395444	0.23686	-1.66953	0.0950132	0.714872	Predicted
N4bp1	161.549	0.227452	0.1363	1.66876	0.0951641	0.715455	Coding
Wdr47	24.1248	-0.413103	0.247655	-1.66806	0.0953041	0.715956	Coding
Rplp2	17131.2	-0.066039	0.0396033	-1.66751	0.0954125	0.716218	Ribosomal
Gngt2	87.5067	0.258028	0.1548	1.66685	0.095544	0.716654	Coding
Gm11579	22.6194	-0.452953	0.273444	-1.65647	0.0976263	0.717094	Predicted
Trim14	23.0875	0.396575	0.239951	1.65273	0.0983854	0.717094	Coding
Irak1bp1	18.2512	-0.466787	0.2825	-1.65234	0.0984654	0.717094	Coding
Sec63	211.254	0.143598	0.0867137	1.656	0.0977222	0.717094	Coding
Prrt1	54.7112	0.277577	0.167245	1.6597	0.0969744	0.717094	Coding
Siglecf	17.4326	-0.744517	0.447078	-1.6653	0.0958537	0.717094	Coding
Gm43313	21.9349	0.44697	0.268919	1.6621	0.0964931	0.717094	Predicted
Dapp1	102.032	0.209685	0.126709	1.65486	0.097953	0.717094	Coding
Ramp1	341.841	-0.255032	0.153221	-1.66448	0.096017	0.717094	Coding
Gm7666	16.7879	0.505264	0.304665	1.65842	0.0972321	0.717094	Predicted
Map2k3	433.414	0.190692	0.11498	1.65848	0.0972213	0.717094	Coding
Mt1	616.349	0.420918	0.253963	1.6574	0.0974395	0.717094	Coding
Tnk2	50.0579	0.301283	0.182132	1.6542	0.0980868	0.717094	Coding
Wdfy1	288.185	0.144159	0.0870372	1.65629	0.0976633	0.717094	Coding
Itgb3	73.3076	0.29532	0.178606	1.65347	0.0982344	0.717094	Coding
Tspyl2	43.1795	-0.363473	0.219953	-1.6525	0.0984324	0.717094	Coding
Gm11808	261.059	-0.156366	0.0945539	-1.65372	0.0981842	0.717094	Predicted
Rhoc	179.345	-0.181609	0.109855	-1.65318	0.0982952	0.717094	Coding
Clk3	142.02	0.206016	0.124359	1.65662	0.0975969	0.717094	Coding
Them6	66.2284	0.355802	0.215165	1.65363	0.0982036	0.717094	Coding
Tsen2	43.0048	-0.359294	0.215863	-1.66445	0.0960224	0.717094	Coding
Fdx1	244.073	-0.156441	0.0944385	-1.65653	0.0976139	0.717094	Coding
Trp53i11	99.2203	0.253497	0.153319	1.65339	0.0982513	0.717094	Coding
Dyrk2	105.161	0.268155	0.16164	1.65896	0.0971234	0.717094	Coding
Vdac1	542.77	-0.108012	0.0652394	-1.65562	0.0977989	0.717094	Coding
9530068E07Rik	267.723	-0.15524	0.0938766	-1.65366	0.0981974	0.717094	Coding
2610008E11Rik	28.7565	0.37574	0.225544	1.66593	0.0957271	0.717094	Coding
Sult2b1	29.5653	0.505215	0.30379	1.66304	0.0963043	0.717094	Coding
H2-T10	303.181	0.148343	0.0897787	1.65231	0.0984708	0.717094	Coding
Txnip	616.303	0.180672	0.108739	1.66153	0.096607	0.717094	Coding
Ccr1	43.3897	0.444384	0.26712	1.66361	0.0961899	0.717094	Coding
Ikbkap	46.5197	0.298929	0.180025	1.66049	0.0968167	0.717094	Coding
2310057M21Rik	32.3306	0.355087	0.213616	1.66227	0.0964588	0.717094	Coding
Actn4	570.263	-0.120626	0.0725422	-1.66284	0.0963446	0.717094	Coding
Fam214a	33.2931	-0.398403	0.240033	-1.65979	0.0969573	0.717094	Coding
Tmem120a	85.6692	0.248899	0.149808	1.66146	0.0966217	0.717094	Coding
Zfp760	33.9025	0.350774	0.211688	1.65703	0.0975132	0.717094	Coding
Chmp2b	153.805	-0.187367	0.112957	-1.65874	0.0971676	0.717094	Coding
Fam173a	491.398	-0.133786	0.0804687	-1.66258	0.0963969	0.717094	Coding
Cbll1	85.7966	0.233768	0.141559	1.65138	0.0986602	0.717243	Coding
Uqcrb	1646.37	-0.0897256	0.0543419	-1.65113	0.0987119	0.717243	Coding
Lbh	311.378	-0.142297	0.0861731	-1.6513	0.0986783	0.717243	Coding
Ubald1	126.364	0.182863	0.11085	1.64964	0.0990156	0.717634	Coding
Jpt1	1440.4	0.118784	0.0719963	1.64987	0.0989704	0.717634	Coding
Specc1	38.3205	-0.446049	0.270378	-1.64972	0.0989996	0.717634	Coding
Rps8	31192.9	-0.0734192	0.0445119	-1.64943	0.0990602	0.717634	Ribosomal
Zfp874a	22.6599	0.435694	0.26426	1.64873	0.0992022	0.717682	Coding
Atxn10	361.978	-0.168475	0.102188	-1.64868	0.0992139	0.717682	Coding
Gm37390	99.8908	0.262221	0.159195	1.64717	0.0995234	0.719386	Predicted
Maml2	50.1335	0.281263	0.170795	1.64679	0.0996021	0.719423	Coding
1700037C18Rik	24.1248	0.400472	0.24336	1.64559	0.0998472	0.719594	Coding
Tstd2	38.8502	-0.331478	0.201393	-1.64593	0.0997785	0.719594	Coding
Slc16a13	17.4235	-0.523788	0.318223	-1.64598	0.0997681	0.719594	Coding
Gm36989	19.2009	0.449526	0.273369	1.64439	0.100095	0.720848	Predicted
Nudt5	374.79	-0.144187	0.087718	-1.64375	0.100227	0.721264	Coding
Tmem115	69.1744	0.250649	0.152527	1.64331	0.100318	0.721388	Coding
Gbp2b	188.168	0.352713	0.214732	1.64257	0.100472	0.721832	Coding
Nfrkb	83.6109	0.215115	0.131009	1.64198	0.100594	0.721832	Coding
Tap2	652.388	0.0973611	0.0592963	1.64194	0.100602	0.721832	Coding
Pigv	29.5841	0.370708	0.225966	1.64055	0.100891	0.72337	Coding
Ikbke	39.0891	0.332197	0.202563	1.63997	0.101011	0.723701	Coding
Rpl9	22324.6	-0.0633637	0.0386467	-1.63956	0.101096	0.723777	Ribosomal
Gm14636	17.3873	0.469672	0.286851	1.63734	0.101559	0.724968	Predicted
Arntl	36.082	0.401405	0.245098	1.63773	0.101478	0.724968	Coding
Gm5561	32.586	-0.374415	0.228618	-1.63773	0.101479	0.724968	Predicted
Stat2	66.273	0.287435	0.175516	1.63766	0.101493	0.724968	Coding
Ecm1	30.2513	0.4388	0.268073	1.63687	0.101659	0.725145	Coding
Dock9	65.0437	-0.299431	0.183062	-1.63568	0.101907	0.725849	Coding
Mbd6	58.1732	-0.275591	0.168527	-1.63529	0.101988	0.725849	Coding
Prr5l	17.7849	0.483602	0.295706	1.63541	0.101962	0.725849	Coding
Trip4	102.888	0.233354	0.142727	1.63497	0.102055	0.725849	Coding
Neil1	28.091	0.395671	0.242065	1.63457	0.102139	0.725918	Coding
L3mbtl2	59.2067	0.268444	0.164996	1.62697	0.103744	0.726788	Coding
Gm9825	84.8171	0.241267	0.14802	1.62997	0.103108	0.726788	Predicted
Gbp8	173.132	0.193795	0.118946	1.62926	0.103258	0.726788	Coding
Agpat4	218.182	0.22139	0.136083	1.62688	0.103763	0.726788	Coding
Tesc	77.6463	0.454283	0.278598	1.63061	0.102973	0.726788	Coding
Usf2	372.818	-0.119594	0.0733152	-1.63123	0.102841	0.726788	Coding
Gm37529	103.114	-0.216149	0.132501	-1.6313	0.102826	0.726788	Predicted
Mob4	351.302	0.151177	0.0928095	1.62889	0.103336	0.726788	Coding
Gpd2	281.157	-0.25086	0.154225	-1.62658	0.103827	0.726788	Coding
AU040320	44.6163	-0.295416	0.181218	-1.63017	0.103066	0.726788	Coding
Kif1c	44.7871	-0.300901	0.184274	-1.63289	0.102491	0.726788	Coding
Cdkn2aip	79.3398	0.243979	0.149894	1.62768	0.103594	0.726788	Coding
Nck1	186.211	0.161506	0.0992359	1.6275	0.103631	0.726788	Coding
Pms1	36.0672	-0.361787	0.222262	-1.62775	0.103578	0.726788	Coding
Ppp1r35	195.582	-0.165251	0.101395	-1.62977	0.10315	0.726788	Coding
Pwp2	25.3732	0.4714	0.28881	1.63221	0.102635	0.726788	Coding
Zfp513	40.6506	-0.306082	0.187607	-1.6315	0.102784	0.726788	Coding
Klrg1	20.2503	0.551988	0.339053	1.62803	0.103519	0.726788	Coding
P2ry10	328.842	0.161399	0.0991137	1.62843	0.103435	0.726788	Coding
Lpcat4	91.6054	-0.224648	0.137563	-1.63305	0.102458	0.726788	Coding
Smndc1	378.417	0.135962	0.0832653	1.63288	0.102494	0.726788	Coding
Ssbp4	635.352	0.10235	0.0629695	1.62539	0.10408	0.728022	Coding
AW146154	16.6305	-0.467039	0.287668	-1.62354	0.104474	0.728022	Coding
Sub1	5457.87	0.147107	0.090583	1.62401	0.104375	0.728022	Coding
Prkce	28.1791	0.373811	0.230191	1.62392	0.104393	0.728022	Coding
Mef2d	234.113	0.156124	0.0961407	1.62391	0.104394	0.728022	Coding
1810013L24Rik	64.3884	0.268111	0.165073	1.62419	0.104335	0.728022	Coding
AW011738	23.4113	0.448995	0.276654	1.62295	0.1046	0.728022	Coding
Itm2b	3407.78	0.149538	0.0921261	1.62318	0.10455	0.728022	Coding
C030034I22Rik	51.0983	-0.300059	0.184934	-1.62252	0.104691	0.728135	Noncoding
Mier3	33.7442	0.3473	0.214276	1.6208	0.10506	0.729656	Coding
Kdelc2	26.2424	-0.419788	0.258985	-1.6209	0.105039	0.729656	Coding
St13	943.564	-0.102023	0.0629617	-1.6204	0.105147	0.729745	Coding
Aptx	59.529	0.276031	0.170716	1.61691	0.105898	0.731018	Coding
Nup37	89.3772	-0.242714	0.150167	-1.61629	0.106031	0.731018	Coding
A630081D01Rik	216.915	0.231219	0.14304	1.61646	0.105995	0.731018	Noncoding
Adck1	27.3667	-0.372119	0.230214	-1.6164	0.106007	0.731018	Coding
Cdca8	295.97	-0.203266	0.125575	-1.61868	0.105516	0.731018	Coding
Degs1	371.806	-0.111833	0.0692006	-1.61606	0.10608	0.731018	Coding
AW112010	16838.8	0.217418	0.134535	1.61608	0.106078	0.731018	Noncoding
Cep290	32.6479	-0.419276	0.25918	-1.6177	0.105727	0.731018	Coding
Cfl2	92.1009	0.201469	0.124593	1.61701	0.105875	0.731018	Coding
Smox	55.8789	0.396069	0.245002	1.61659	0.105966	0.731018	Coding
Zfp809	35.7256	0.370001	0.229153	1.61464	0.106388	0.73135	Coding
BC052040	22.3395	0.424255	0.262911	1.61368	0.106597	0.73135	Coding
Etnk1	184.982	0.163827	0.101476	1.61445	0.106431	0.73135	Coding
Grap	437.332	0.211846	0.131173	1.61502	0.106307	0.73135	Coding
Sugp1	70.1856	-0.236991	0.146883	-1.61347	0.106642	0.73135	Coding
Fam69a	60.9073	0.324674	0.201094	1.61453	0.106412	0.73135	Coding
Slc35a3	75.4911	0.241625	0.14976	1.61342	0.106654	0.73135	Coding
Trbv12-2	20.1922	0.578409	0.358795	1.61209	0.106943	0.732302	Coding
Baiap2	100.436	0.200816	0.12456	1.61221	0.106917	0.732302	Coding
Pigt	167.826	0.182131	0.113042	1.61118	0.107141	0.733148	Coding
Usp47	115.404	0.218936	0.135967	1.61021	0.107352	0.733559	Coding
Pmaip1	174.772	0.232729	0.144508	1.61049	0.107291	0.733559	Coding
Qrfp	89.0184	-0.372523	0.23143	-1.60966	0.107473	0.733664	Coding
Nckap1	22.8041	0.423177	0.262968	1.60924	0.107565	0.733664	Coding
Rnf138	445.232	0.179261	0.111404	1.60911	0.107593	0.733664	Coding
Zfp830	130.594	0.210799	0.131057	1.60846	0.107734	0.733955	Coding
Ifi203	1016.64	0.188758	0.11737	1.60822	0.107786	0.733955	Coding
Ttbk2	28.0531	0.400432	0.249149	1.6072	0.108011	0.734554	Coding
Mut	67.6766	-0.240431	0.149603	-1.60713	0.108025	0.734554	Coding
AI606181	18.3375	0.493449	0.307335	1.60557	0.108368	0.735697	Coding
Dnttip2	281.032	0.146519	0.0912698	1.60534	0.108419	0.735697	Coding
Fut11	58.5209	-0.264029	0.164443	-1.6056	0.108363	0.735697	Coding
Kat8	42.8401	-0.357911	0.223092	-1.60432	0.108643	0.736704	Coding
Cep250	107.3	-0.224154	0.139958	-1.60158	0.109248	0.737235	Coding
Pgam5	91.6057	0.213079	0.133071	1.60124	0.109324	0.737235	Coding
Dtnb	57.4037	-0.29983	0.187584	-1.59838	0.109959	0.737235	Coding
Ddt	543.76	-0.115673	0.0722895	-1.60014	0.109567	0.737235	Coding
Atn1	65.1966	-0.266484	0.166614	-1.59941	0.109729	0.737235	Coding
Trappc6b	474.91	0.11537	0.0722617	1.59655	0.110366	0.737235	Coding
Zrsr1	33.5141	0.424078	0.265259	1.59873	0.10988	0.737235	Coding
Gm13092	33.606	-0.377197	0.235624	-1.60084	0.109411	0.737235	Predicted
Heatr6	112.101	-0.19364	0.120919	-1.60139	0.10929	0.737235	Coding
Coro7	127.459	0.195716	0.122594	1.59647	0.110385	0.737235	Coding
Pknox1	73.0342	0.253357	0.158299	1.6005	0.109488	0.737235	Coding
Zfp280c	34.9072	0.36387	0.227918	1.5965	0.110377	0.737235	Coding
Btbd8	20.7286	-0.433008	0.271098	-1.59724	0.110212	0.737235	Coding
Kmt2e	665.012	0.144944	0.0905601	1.60053	0.109481	0.737235	Coding
Tcp11l2	92.1243	0.247554	0.154411	1.60321	0.108887	0.737235	Coding
Oxld1	39.1638	-0.312604	0.195636	-1.59789	0.110068	0.737235	Coding
Nmrk1	61.9469	0.26893	0.168385	1.59711	0.11024	0.737235	Coding
Rdm1	118.757	-0.184956	0.115658	-1.59916	0.109786	0.737235	Coding
Snf8	470.482	0.111385	0.0697314	1.59734	0.11019	0.737235	Coding
Arl4c	357.814	0.28575	0.17858	1.60012	0.109572	0.737235	Coding
Gm10653	22.7839	-0.409045	0.255472	-1.60113	0.109347	0.737235	Predicted
Rad21	393.523	0.124638	0.077958	1.59878	0.10987	0.737235	Coding
Trappc13	93.688	-0.244692	0.153315	-1.59601	0.110487	0.737409	Coding
Ost4	1511.29	-0.0925833	0.0580296	-1.59545	0.110612	0.737742	Coding
Inpp1	154.109	0.196468	0.123227	1.59436	0.110855	0.737847	Coding
Sla2	279.456	-0.174048	0.109141	-1.5947	0.11078	0.737847	Coding
Trim23	39.0637	0.323947	0.203161	1.59454	0.110816	0.737847	Coding
Zdhhc2	203.379	-0.217448	0.136438	-1.59375	0.110992	0.738258	Coding
Cbx7	21.3407	0.491193	0.308332	1.59306	0.111146	0.738483	Coding
Timm17a	491.028	0.135626	0.0851519	1.59275	0.111216	0.738483	Coding
Zfand6	477.517	-0.107805	0.0676921	-1.59259	0.111253	0.738483	Coding
Lmna	156.888	0.524187	0.329315	1.59175	0.111441	0.739223	Coding
Cep41	52.6388	-0.267647	0.168236	-1.5909	0.111631	0.739985	Coding
Rps12	24791.4	-0.0844271	0.0531076	-1.58974	0.111894	0.741223	Ribosomal
Rrp1b	150.863	-0.191266	0.120413	-1.58841	0.112193	0.742192	Coding
9130208D14Rik	37.5357	0.311569	0.196148	1.58844	0.112186	0.742192	Noncoding
Cetn2	519.512	-0.139553	0.0879176	-1.58731	0.112442	0.742834	Coding
2610005L07Rik	98.568	0.19125	0.120478	1.58743	0.112416	0.742834	Noncoding
Cd40lg	44.4924	0.77261	0.486929	1.5867	0.112581	0.743245	Coding
Mrpl11	234.823	0.154441	0.0973978	1.58567	0.112814	0.74428	Coding
Ilkap	275.953	-0.12586	0.0793929	-1.58528	0.112903	0.744366	Coding
Agk	36.0967	-0.348234	0.21989	-1.58367	0.113269	0.744442	Coding
Rbpj	960.591	-0.195338	0.123337	-1.58378	0.113244	0.744442	Ribosomal
Smap1	668.555	0.0975724	0.061623	1.58338	0.113336	0.744442	Coding
Wsb1	170.037	0.166696	0.105215	1.58434	0.113117	0.744442	Coding
Gm14681	17.3435	-0.496274	0.313366	-1.58369	0.113265	0.744442	Predicted
Bin1	469.375	-0.151417	0.0956391	-1.58321	0.113373	0.744442	Coding
Dnajc12	51.9393	-0.342193	0.216264	-1.58229	0.113582	0.744816	Coding
Gm17056	69.0147	-0.31413	0.1985	-1.58252	0.11353	0.744816	Predicted
C030037D09Rik	18.3236	-0.534696	0.338032	-1.58179	0.113698	0.745074	Noncoding
Rad51b	29.1425	-0.552324	0.349407	-1.58075	0.113936	0.74613	Coding
Wbp4	390.121	-0.124847	0.0790156	-1.58003	0.114099	0.746697	Coding
Taf15	353.004	0.139837	0.0885341	1.57947	0.114229	0.74678	Coding
Cdt1	122.163	0.217197	0.137534	1.57922	0.114285	0.74678	Coding
Brca2	54.5051	-0.301705	0.191076	-1.57898	0.114341	0.74678	Coding
Dync1h1	144.931	-0.18893	0.119701	-1.57836	0.114484	0.747211	Coding
Ptpn2	289.314	0.133871	0.0848573	1.5776	0.114658	0.747844	Coding
R3hcc1	63.1788	0.257957	0.163926	1.57362	0.115576	0.747876	Coding
Ero1lb	35.8709	0.333877	0.212277	1.57284	0.115757	0.747876	Coding
Pdcl3	401.54	-0.112342	0.0714262	-1.57284	0.115756	0.747876	Coding
Mpg	125.377	0.178297	0.113186	1.57526	0.115196	0.747876	Coding
Ythdf3	154.74	0.178738	0.113749	1.57134	0.116105	0.747876	Coding
Rab29	48.2856	0.266224	0.168876	1.57644	0.114924	0.747876	Coding
Tmem237	56.0436	-0.262143	0.166809	-1.57151	0.116063	0.747876	Coding
Cxcr4	73.3683	0.874845	0.556048	1.57333	0.115643	0.747876	Coding
Atf5	29.1753	0.348456	0.221163	1.57556	0.115127	0.747876	Coding
Lamc1	101.437	0.29287	0.186229	1.57263	0.115805	0.747876	Coding
Tg	108.585	0.346124	0.220323	1.57098	0.116186	0.747876	Coding
Timm10	137.215	0.180277	0.114546	1.57385	0.115523	0.747876	Coding
Akr1e1	25.157	-0.424683	0.270099	-1.57233	0.115875	0.747876	Coding
Snai3	55.3865	0.324983	0.206915	1.57061	0.116273	0.747876	Coding
Slc20a1	131.806	0.190545	0.121171	1.57253	0.115828	0.747876	Coding
Cptp	22.4986	-0.401226	0.255365	-1.57119	0.116139	0.747876	Coding
Uqcrq	1740.57	0.0720305	0.045731	1.57509	0.115235	0.747876	Coding
Cd274	257.573	0.291468	0.185481	1.57142	0.116085	0.747876	Coding
Rbfa	121.944	0.206603	0.131526	1.57081	0.116226	0.747876	Coding
Dnajc3	488.739	0.117852	0.0749063	1.57333	0.115642	0.747876	Coding
Trim8	196.889	-0.161215	0.102452	-1.57357	0.115586	0.747876	Coding
Serf1	34.6537	-0.328446	0.209222	-1.56985	0.11645	0.748029	Coding
Gtf3c3	36.932	0.315122	0.200718	1.56997	0.116422	0.748029	Coding
Acox1	30.2857	0.347878	0.221815	1.56832	0.116805	0.749043	Coding
Rpl3	16234.6	-0.0974542	0.0621422	-1.56825	0.116824	0.749043	Ribosomal
Osbpl5	24.9283	0.382917	0.244179	1.56818	0.116839	0.749043	Coding
Dnaja4	76.1729	0.280342	0.17882	1.56773	0.116945	0.749232	Coding
Dzip3	49.9463	-0.295502	0.188645	-1.56644	0.117245	0.75066	Coding
Acp1	383.754	-0.119254	0.0761707	-1.56561	0.11744	0.751415	Coding
Mgat4a	56.4939	0.287879	0.183957	1.56492	0.117601	0.751458	Coding
Pom121	113.625	0.183982	0.117557	1.56505	0.117572	0.751458	Coding
Cmtm7	1076.59	0.186985	0.119513	1.56455	0.117687	0.751519	Coding
Zbed4	37.7724	-0.316079	0.202084	-1.5641	0.117794	0.751709	Coding
Get4	117.221	0.229124	0.146531	1.56366	0.117897	0.751875	Coding
Gm37954	34.0595	-0.317937	0.203783	-1.56017	0.118719	0.753663	Predicted
Tbx21	347.383	0.170082	0.108969	1.56083	0.118564	0.753663	Coding
Trmt61a	37.4621	-0.333986	0.214003	-1.56067	0.118603	0.753663	Coding
Mt2	102.13	0.411313	0.263358	1.5618	0.118334	0.753663	Coding
Gars	296.373	0.14636	0.0937908	1.56049	0.118644	0.753663	Coding
Olfm1	31.8844	-0.419712	0.268833	-1.56124	0.118468	0.753663	Coding
Metap1d	27.3103	-0.395004	0.253006	-1.56124	0.118467	0.753663	Coding
Hn1l	61.0324	-0.284904	0.182705	-1.55937	0.118909	0.754383	Coding
Nfe2l2	65.7215	0.315727	0.202589	1.55846	0.119125	0.754766	Coding
Aldh3a2	41.7469	-0.302876	0.194315	-1.55868	0.119071	0.754766	Coding
Syne1	39.336	0.304476	0.195556	1.55697	0.119477	0.755933	Coding
Zfp954	48.0132	0.298849	0.192023	1.55631	0.119633	0.755933	Coding
Rps18	12936.3	-0.0865893	0.0556377	-1.55631	0.119635	0.755933	Ribosomal
S1pr1	61.9049	0.85628	0.550291	1.55605	0.119696	0.755933	Coding
Abr	84.4154	0.244561	0.157109	1.55663	0.119558	0.755933	Coding
Dhrs1	115.773	0.190175	0.122297	1.55502	0.119942	0.756014	Coding
Mon1a	27.5877	0.358774	0.230707	1.55511	0.11992	0.756014	Coding
Pgam1	2018.27	-0.0844344	0.0542845	-1.5554	0.11985	0.756014	Coding
Vamp5	157.228	-0.196104	0.126206	-1.55385	0.120221	0.756266	Coding
Xpa	227.02	0.153002	0.0984481	1.55413	0.120153	0.756266	Coding
Hsph1	543.521	0.21899	0.140961	1.55355	0.120292	0.756266	Coding
Wdyhv1	121.754	-0.174389	0.112205	-1.5542	0.120137	0.756266	Coding
Rnf167	146.838	0.197308	0.127119	1.55216	0.120625	0.757093	Coding
Rad17	101.867	-0.200961	0.129727	-1.54911	0.121355	0.757093	Coding
E230029C05Rik	18.8776	0.484278	0.312216	1.5511	0.120878	0.757093	Noncoding
Ddhd2	85.1086	-0.202869	0.130756	-1.55151	0.12078	0.757093	Coding
Fdps	119.437	0.266031	0.17141	1.55201	0.120659	0.757093	Coding
Ccr7	776.866	-0.67253	0.434045	-1.54945	0.121274	0.757093	Coding
Pde4b	233.394	0.29674	0.191464	1.54985	0.121178	0.757093	Coding
Tm9sf1	120.176	-0.177689	0.114672	-1.54954	0.121252	0.757093	Coding
Ubald2	726.728	0.235006	0.151496	1.55123	0.120846	0.757093	Coding
Hdac6	16.535	0.438858	0.283132	1.55001	0.121138	0.757093	Coding
Hint1	2878.55	-0.075255	0.0485788	-1.54913	0.12135	0.757093	Coding
Npm3	724.519	-0.122233	0.0788236	-1.55072	0.120969	0.757093	Coding
Nusap1	318.764	-0.177585	0.114692	-1.54837	0.121533	0.757718	Coding
Rpl10-ps3	104.252	-0.196708	0.127119	-1.54742	0.121761	0.758169	Ribosomal
Tomm70a	260.559	0.147442	0.0952671	1.54767	0.121702	0.758169	Coding
Dedd2	91.02	0.218782	0.141477	1.54641	0.122005	0.758716	Coding
Sik3	96.1871	0.212135	0.137207	1.54609	0.122082	0.758716	Coding
Lonp1	102.868	0.216943	0.140306	1.54621	0.122054	0.758716	Coding
Tm2d3	170.735	0.196684	0.127247	1.54568	0.122181	0.758846	Coding
Gm26532	117.203	0.229978	0.14917	1.54171	0.123143	0.76285	Predicted
Cdk9	297.991	0.125779	0.0815625	1.54212	0.123045	0.76285	Coding
Yrdc	168.181	0.208629	0.135306	1.5419	0.123097	0.76285	Coding
Aes	2543.58	0.121106	0.0785681	1.54141	0.123217	0.76285	Coding
Rpf1	156.246	0.205	0.132924	1.54224	0.123016	0.76285	Coding
St3gal6	115.242	0.376608	0.244503	1.5403	0.123488	0.764043	Coding
Hinfp	49.2978	-0.286072	0.185806	-1.53963	0.123651	0.764565	Coding
Wipi2	80.0568	0.232166	0.150857	1.53898	0.123808	0.765052	Coding
Tmem128	386.758	-0.135173	0.0879535	-1.53687	0.124325	0.765823	Coding
Hadha	321.615	-0.119528	0.0777643	-1.53706	0.124279	0.765823	Coding
Krt10	18.2447	-0.501008	0.325903	-1.53729	0.124222	0.765823	Coding
Pggt1b	85.197	-0.229229	0.149043	-1.538	0.124048	0.765823	Coding
Usmg5	1529.77	-0.0684585	0.0445197	-1.53771	0.124119	0.765823	Coding
Pde4a	24.4389	-0.449258	0.292496	-1.53595	0.124551	0.76673	Coding
St3gal4	198.191	0.162725	0.105969	1.53559	0.124639	0.766783	Coding
Gm6266	16.637	-0.442149	0.288146	-1.53446	0.124916	0.768005	Predicted
Dbnl	730.002	-0.103005	0.0672235	-1.53228	0.125453	0.769167	Coding
Lipo3	17.2523	-0.461745	0.301307	-1.53247	0.125406	0.769167	Coding
Epb41l2	78.0895	-0.297689	0.194274	-1.53232	0.125444	0.769167	Coding
Zfp69	19.804	0.4562	0.297615	1.53285	0.125312	0.769167	Coding
Elf1	706.651	0.113118	0.0738325	1.53209	0.125499	0.769167	Coding
Rpl37a	24780	-0.0606104	0.039579	-1.53138	0.125676	0.769282	Ribosomal
Casp8ap2	250.107	0.13177	0.0860285	1.5317	0.125597	0.769282	Coding
Ldah	92.1558	-0.253928	0.16593	-1.53034	0.125933	0.77033	Coding
Praf2	66.0033	-0.259379	0.169665	-1.52877	0.126321	0.77033	Coding
Mrps23	297.051	0.156032	0.102044	1.52907	0.126246	0.77033	Coding
Arhgap30	821.407	0.0874856	0.0572012	1.52944	0.126156	0.77033	Coding
Grwd1	57.4953	0.288428	0.188664	1.52879	0.126317	0.77033	Coding
Gch1	214.915	0.22963	0.150128	1.52956	0.126125	0.77033	Coding
Ehd1	397.753	0.165975	0.108598	1.52833	0.12643	0.770509	Coding
Ifit2	63.3686	0.345121	0.22619	1.5258	0.127059	0.77094	Coding
Zfp672	59.6515	0.237607	0.155918	1.52392	0.127528	0.77094	Coding
Ulk2	50.0207	0.267351	0.175368	1.52451	0.127381	0.77094	Coding
Ado	91.7697	0.214291	0.140582	1.52431	0.127432	0.77094	Coding
Pdk3	116.931	-0.171666	0.11263	-1.52415	0.127471	0.77094	Coding
Nfatc2	40.342	0.315623	0.206643	1.52739	0.126664	0.77094	Coding
Gm10420	20.2096	-0.393321	0.257616	-1.52677	0.126818	0.77094	Predicted
2010315B03Rik	31.6808	-0.324076	0.212334	-1.52626	0.126946	0.77094	Coding
Necap2	226.006	0.144393	0.0946148	1.52611	0.126982	0.77094	Coding
9430015G10Rik	20.5165	-0.414456	0.271699	-1.52542	0.127154	0.77094	Coding
Slc26a2	47.0365	0.281548	0.184503	1.52598	0.127016	0.77094	Coding
Shoc2	126.279	-0.174764	0.114663	-1.52415	0.127472	0.77094	Coding
Rpl13a-ps1	51.9008	-0.269887	0.176748	-1.52696	0.126772	0.77094	Ribosomal
Rhog	336.286	0.122643	0.0805182	1.52318	0.127715	0.771591	Coding
Mief2	27.7367	0.37195	0.244294	1.52255	0.12787	0.771928	Coding
Ppp3cb	302.167	0.13808	0.0907506	1.52153	0.128126	0.771928	Coding
Mark2	263.734	0.162664	0.106902	1.52161	0.128106	0.771928	Coding
Cyfip1	102.873	-0.208842	0.137204	-1.52212	0.127978	0.771928	Coding
Itgb7	316.643	0.60416	0.397198	1.52106	0.128246	0.771928	Coding
Zfp609	37.4231	-0.303879	0.199761	-1.52121	0.128207	0.771928	Coding
Ilf3	140.214	-0.160145	0.105513	-1.51778	0.129069	0.77286	Coding
4930509H03Rik	35.148	0.325064	0.214141	1.51799	0.129017	0.77286	Noncoding
Ylpm1	114.667	-0.184507	0.121614	-1.51715	0.129229	0.77286	Coding
Dnajc11	61.4148	0.239016	0.157288	1.5196	0.12861	0.77286	Coding
Nefh	31.4785	0.341082	0.224634	1.51839	0.128916	0.77286	Coding
Chmp4b	931.393	0.105051	0.0691326	1.51955	0.128623	0.77286	Coding
Gm10031	28.4763	-0.359352	0.236887	-1.51698	0.129272	0.77286	Predicted
Slc25a40	86.4705	0.241696	0.159101	1.51914	0.128728	0.77286	Coding
Guf1	45.3075	-0.268792	0.177008	-1.51853	0.12888	0.77286	Coding
Mink1	113.453	-0.195883	0.129115	-1.51712	0.129236	0.77286	Coding
Incenp	194.069	0.173472	0.114237	1.51853	0.128882	0.77286	Coding
mt-Co3	125.669	-0.197194	0.130143	-1.51521	0.129719	0.774108	Mitochondrial
Bckdhb	33.4724	-0.330184	0.217851	-1.51564	0.129611	0.774108	Coding
Anxa4	80.861	-0.243612	0.160745	-1.51552	0.129641	0.774108	Coding
Gimap5	307.226	0.137927	0.0911079	1.51388	0.130056	0.77558	Coding
Abi1	372.851	-0.120585	0.079667	-1.51361	0.130125	0.77558	Coding
Wdr37	80.3793	-0.203816	0.135194	-1.50758	0.131662	0.779251	Coding
Slfn1	307.112	0.399793	0.264714	1.51028	0.130972	0.779251	Coding
1810026B05Rik	868.719	0.0941651	0.0624597	1.50762	0.131653	0.779251	Noncoding
Tiam1	46.638	-0.464823	0.308126	-1.50855	0.131414	0.779251	Coding
Nup188	54.2912	-0.250712	0.166352	-1.50712	0.13178	0.779251	Coding
St7l	52.7718	-0.268132	0.177892	-1.50727	0.131741	0.779251	Coding
Sms	724.291	-0.112679	0.0747211	-1.508	0.131555	0.779251	Coding
Zyg11b	114.504	0.199516	0.132297	1.50809	0.131532	0.779251	Coding
Uxs1	94.4524	-0.207961	0.137985	-1.50713	0.131778	0.779251	Coding
Gm26510	19.4827	0.415398	0.275515	1.50771	0.131628	0.779251	Predicted
Vps37b	1396.25	0.176118	0.116801	1.50785	0.131593	0.779251	Coding
Mbnl2	228.813	0.143867	0.0952877	1.50981	0.131091	0.779251	Coding
Polr3h	63.0856	-0.24729	0.163711	-1.51052	0.13091	0.779251	Coding
Slc25a11	492.977	-0.143325	0.0952862	-1.50415	0.132542	0.782259	Coding
AC125206.3	25.8732	0.361225	0.240193	1.50389	0.132609	0.782259	Noncoding
Clec2d	670.125	0.178795	0.118845	1.50444	0.132468	0.782259	Coding
Atp9a	31.366	-0.343695	0.228401	-1.50479	0.132378	0.782259	Coding
Ino80b	154.771	0.176429	0.117343	1.50353	0.132702	0.782333	Coding
Pogz	32.0087	0.332426	0.221194	1.50287	0.132872	0.782438	Coding
Cd3e	3264.52	-0.133048	0.088568	-1.50222	0.133041	0.782438	Coding
Tmem131	67.1622	-0.220924	0.147053	-1.50234	0.133009	0.782438	Coding
Dnajb6	1009.43	0.107408	0.0714726	1.50279	0.132894	0.782438	Coding
Crat	19.6458	-0.471758	0.314198	-1.50147	0.133235	0.783105	Coding
Pfdn1	610.206	-0.0939577	0.0625944	-1.50106	0.133341	0.783259	Coding
Tspan14	112.071	0.181256	0.120804	1.50041	0.133508	0.783766	Coding
Ascc1	92.5037	-0.197209	0.131555	-1.49907	0.133856	0.78424	Coding
Kcnk10	21.9079	-1.12125	0.747702	-1.4996	0.133718	0.78424	Coding
Stk25	61.0969	-0.271656	0.181228	-1.49897	0.133881	0.78424	Coding
Hars	173.637	0.146657	0.0978461	1.49886	0.13391	0.78424	Coding
A430005L14Rik	172.804	-0.158657	0.105905	-1.49811	0.134106	0.784914	Coding
Emc2	343.898	-0.129384	0.0863911	-1.49766	0.134222	0.785123	Coding
Gm38009	20.8003	0.441664	0.294986	1.49724	0.134331	0.785291	Predicted
Umad1	43.4637	-0.276262	0.184744	-1.49538	0.134816	0.787179	Coding
Tab2	382.126	-0.110665	0.0739971	-1.49553	0.134775	0.787179	Coding
Ccdc22	55.3919	-0.251668	0.168479	-1.49376	0.135238	0.787486	Coding
Utp14b	23.6933	0.409872	0.274413	1.49363	0.135272	0.787486	Coding
Atp5h	3814.98	0.0724397	0.0484903	1.4939	0.135201	0.787486	Coding
Rpl21-ps15	41.3982	-0.307194	0.20557	-1.49435	0.135085	0.787486	Ribosomal
H2-D1	27350.6	0.116694	0.0780718	1.4947	0.134993	0.787486	Coding
Armc1	208.125	-0.137975	0.09245	-1.49242	0.135588	0.787625	Coding
Mtap	136.86	0.179324	0.120166	1.49231	0.135619	0.787625	Coding
Gm16585	49.8632	-0.253926	0.170155	-1.49232	0.135615	0.787625	Predicted
Cnn2	1447.06	0.0958281	0.064182	1.49307	0.135419	0.787625	Coding
Mpdu1	176.537	0.142624	0.0956122	1.4917	0.135779	0.788084	Coding
Morf4l2	260.571	-0.125826	0.0843691	-1.49137	0.135864	0.788107	Coding
Sema6d	45.037	-0.788983	0.529279	-1.49068	0.136047	0.788231	Coding
Pafah1b3	179.031	-0.188682	0.12655	-1.49097	0.135969	0.788231	Coding
AC122335.3	26.6873	-0.386309	0.25924	-1.49016	0.136182	0.788544	Noncoding
Fbxl8	80.2886	-0.206002	0.138337	-1.48913	0.136453	0.788709	Coding
2020-03-07	272.058	0.152295	0.10226	1.48929	0.13641	0.788709	Coding
Ly9	55.8385	0.404989	0.271902	1.48947	0.136364	0.788709	Coding
Smad4	177.914	0.149077	0.100179	1.4881	0.136724	0.78934	Coding
Sbno2	36.4086	0.34225	0.229959	1.48831	0.136669	0.78934	Coding
Gm6136	23.6217	-0.361937	0.243651	-1.48548	0.137418	0.790032	Predicted
Rpl23	32585	-0.0630234	0.0424344	-1.4852	0.137492	0.790032	Ribosomal
Sap30	195.248	-0.189897	0.127799	-1.4859	0.137305	0.790032	Coding
Impdh2-ps	22.2995	-0.390642	0.262766	-1.48665	0.137106	0.790032	Noncoding
Capg	2570.06	-0.158452	0.106593	-1.48651	0.137143	0.790032	Coding
Calca	30.9983	1.46652	0.987369	1.48528	0.137468	0.790032	Coding
Impact	109.343	0.220457	0.148354	1.48602	0.137274	0.790032	Coding
Ttc5	207.478	-0.147597	0.0993356	-1.48584	0.13732	0.790032	Coding
Ppm1a	134.832	0.166256	0.112115	1.48291	0.138098	0.790252	Coding
Ankrd13a	152.192	0.166271	0.112091	1.48336	0.137978	0.790252	Coding
Zfp280b	35.7573	0.331377	0.223374	1.48351	0.137939	0.790252	Coding
Slc12a7	25.0584	0.382612	0.257837	1.48393	0.137827	0.790252	Coding
Fdft1	54.4086	-0.268578	0.181096	-1.48307	0.138056	0.790252	Coding
Zfp871	149.129	0.164021	0.110572	1.48339	0.137971	0.790252	Coding
Cmc4	62.355	-0.232317	0.156588	-1.48362	0.137911	0.790252	Coding
Atp11a	17.7545	-0.449972	0.303751	-1.48139	0.138504	0.792112	Coding
Pnpt1	68.5474	-0.227379	0.153539	-1.48092	0.138628	0.792359	Coding
Hspa4l	173.81	-0.169441	0.114476	-1.48015	0.138834	0.793031	Coding
Haus3	116.061	0.187785	0.126893	1.47987	0.138909	0.793031	Coding
Mdh1	1394.38	0.0994139	0.0672386	1.47852	0.139268	0.794615	Coding
Pdgfb	41.2147	-0.446643	0.302375	-1.47712	0.139644	0.796297	Coding
Ifit1bl1	18.3336	0.714597	0.484135	1.47603	0.139936	0.796632	Coding
Eif3g	514.225	0.102169	0.0692381	1.47561	0.140048	0.796632	Coding
Cdk10	31.8118	-0.340386	0.230711	-1.47538	0.140111	0.796632	Coding
Kctd9	79.5307	-0.247596	0.16777	-1.47581	0.139996	0.796632	Coding
Il7r	742.304	-0.190214	0.128903	-1.47563	0.140044	0.796632	Coding
Gpr162	25.8085	-0.364914	0.24752	-1.47428	0.140405	0.797837	Coding
Crls1	82.4394	-0.210606	0.142883	-1.47397	0.140488	0.797847	Coding
Fbxo9	172.831	0.173966	0.118124	1.47274	0.140822	0.799277	Coding
Armc5	30.5665	0.327087	0.222168	1.47225	0.140953	0.799553	Coding
Klre1	654.294	-0.34474	0.234236	-1.47177	0.141084	0.799635	Coding
Il1rap	27.7748	0.385237	0.261782	1.47159	0.141131	0.799635	Coding
Srsf3	2095.83	-0.0891038	0.0605671	-1.47116	0.141248	0.799832	Coding
Cdc25b	93.8136	0.292494	0.198908	1.4705	0.141427	0.800032	Coding
Ccdc50	538.722	-0.124353	0.0845697	-1.47042	0.141448	0.800032	Coding
BC005537	444.259	0.0976623	0.0664871	1.46889	0.141862	0.801913	Coding
Prkdc	53.9489	-0.24997	0.170385	-1.46709	0.142352	0.804215	Coding
Ncapg	124.162	0.179322	0.122301	1.46624	0.142584	0.805058	Coding
Mfge8	43.5612	-0.31567	0.215402	-1.46549	0.142787	0.805741	Coding
Ncor1	1003.06	0.0757579	0.0517371	1.46429	0.143116	0.80635	Coding
Cry1	66.7809	0.274811	0.187727	1.46388	0.143226	0.80635	Coding
Tnf	221.192	0.499777	0.341282	1.46441	0.143082	0.80635	Coding
Paip1	94.6108	-0.198358	0.135478	-1.46414	0.143155	0.80635	Coding
Mylpf	32.0991	-0.311275	0.212701	-1.46344	0.143347	0.806565	Coding
Mrps31	96.2398	0.190138	0.13004	1.46216	0.143699	0.807753	Coding
Polg	43.9268	-0.285411	0.195211	-1.46206	0.143724	0.807753	Coding
Pou2f2	349.523	-0.272896	0.186766	-1.46116	0.143971	0.808673	Coding
Klra5	885.029	-0.625998	0.428539	-1.46077	0.144077	0.808808	Coding
Leo1	93.5798	0.185838	0.127441	1.45822	0.144779	0.809486	Coding
Pgap2	64.2489	-0.224514	0.153914	-1.45869	0.144649	0.809486	Coding
Hmox2	265.649	-0.137671	0.094399	-1.4584	0.144731	0.809486	Coding
Gm10320	25.9548	-0.363665	0.249368	-1.45834	0.144746	0.809486	Predicted
Tex9	97.6998	-0.284109	0.19466	-1.45952	0.144423	0.809486	Coding
Itpk1	115.808	0.202247	0.138689	1.45828	0.144763	0.809486	Coding
Tsc2	32.0921	0.320092	0.21932	1.45947	0.144435	0.809486	Coding
Eif3j1	216.405	0.152107	0.104335	1.45787	0.144875	0.809559	Coding
Gtf2e2	261.647	-0.128038	0.0878819	-1.45693	0.145136	0.809624	Coding
Adgrl1	20.101	-0.426881	0.292985	-1.45701	0.145114	0.809624	Coding
Gpr65	348.456	0.204481	0.140316	1.45729	0.145037	0.809624	Coding
0610010K14Rik	237.035	-0.138079	0.0948118	-1.45634	0.145297	0.81006	Coding
Vps41	137.895	0.175069	0.12038	1.45431	0.145862	0.811915	Coding
Pbrm1	490.922	0.133561	0.0918602	1.45396	0.145958	0.811915	Coding
Socs4	126.547	0.177485	0.12209	1.45373	0.146023	0.811915	Coding
Tars2	73.9855	-0.209125	0.143863	-1.45364	0.146046	0.811915	Coding
Dennd1b	186.503	0.154938	0.106547	1.45417	0.145898	0.811915	Coding
Dapk2	165.043	-0.462936	0.318539	-1.45331	0.146138	0.811959	Coding
Atxn2	57.7768	-0.265879	0.182989	-1.45298	0.14623	0.812008	Coding
Eif4a1	2468.7	0.0880817	0.0606362	1.45263	0.146328	0.812089	Coding
Impa2	486.634	-0.182536	0.125715	-1.45199	0.146505	0.812613	Coding
Tsr1	65.3609	0.241614	0.166692	1.44946	0.147208	0.813997	Coding
1810037I17Rik	1834.03	-0.0840518	0.058026	-1.44852	0.147472	0.813997	Coding
Fez2	35.8082	0.320011	0.221077	1.44751	0.147754	0.813997	Coding
Nol7	1634.79	-0.0961473	0.0664301	-1.44735	0.1478	0.813997	Coding
Slf1	77.7663	-0.211224	0.145836	-1.44837	0.147514	0.813997	Coding
Rtn4	457.892	-0.106589	0.0736345	-1.44754	0.147747	0.813997	Coding
Ccl9	82.4193	0.656378	0.453199	1.44832	0.147527	0.813997	Coding
Nsd1	316.117	-0.110913	0.0764605	-1.4506	0.146892	0.813997	Coding
Usp42	55.4842	0.255669	0.176579	1.44791	0.147644	0.813997	Coding
Clec16a	33.6437	0.328457	0.226467	1.45035	0.14696	0.813997	Coding
Trp53i13	89.4076	-0.212229	0.146507	-1.44859	0.147453	0.813997	Coding
Ndufab1	630.949	-0.0877026	0.060511	-1.44937	0.147235	0.813997	Coding
Rpl27-ps3	18.8847	-0.416422	0.287742	-1.4472	0.14784	0.813997	Ribosomal
Arap2	285.208	0.190468	0.131787	1.44527	0.148382	0.814119	Coding
Zmiz2	208.846	-0.151874	0.105099	-1.44505	0.148443	0.814119	Coding
Gm20091	30.6076	-0.387202	0.267905	-1.44529	0.148375	0.814119	Predicted
Ifi44	18.2012	1.12702	0.780156	1.4446	0.148569	0.814119	Coding
Cib2	17.4102	-0.634492	0.438729	-1.44621	0.14812	0.814119	Coding
Zfp738	24.8255	-0.344135	0.237989	-1.44601	0.148174	0.814119	Coding
Lman1	269.183	-0.147659	0.102246	-1.44415	0.148697	0.814119	Coding
Frrs1	65.8064	0.249181	0.172523	1.44433	0.148645	0.814119	Coding
Rps6kb2	62.0422	0.242882	0.168154	1.4444	0.148627	0.814119	Ribosomal
Gm8186	498.144	-0.0926848	0.064097	-1.44601	0.148175	0.814119	Predicted
Ttc9c	82.6992	-0.210731	0.145983	-1.44353	0.148871	0.814157	Coding
Tk1	254.551	-0.180426	0.124983	-1.4436	0.14885	0.814157	Coding
Samd8	35.9256	0.33795	0.234242	1.44274	0.149095	0.814922	Coding
Gm15730	31.9946	-0.324092	0.224691	-1.44239	0.149192	0.815	Predicted
Jmy	46.3573	0.263866	0.182987	1.44199	0.149305	0.815156	Coding
Macf1	556.311	-0.116723	0.0810329	-1.44045	0.149741	0.817083	Coding
Poglut1	32.1624	-0.344184	0.239145	-1.43922	0.150087	0.81714	Coding
Gtdc1	52.6123	0.331247	0.230068	1.43978	0.14993	0.81714	Coding
CT009713.5	71.002	-0.35627	0.247529	-1.4393	0.150065	0.81714	Noncoding
Atp1a1	501.443	-0.0991	0.0688462	-1.43944	0.150026	0.81714	Coding
Gm45546	21.1687	-0.494658	0.343795	-1.43882	0.150203	0.817315	Predicted
Bcap29	303.794	-0.135923	0.0945281	-1.43791	0.150459	0.817797	Coding
Gtf2h3	68.3305	-0.21501	0.149504	-1.43816	0.150389	0.817797	Coding
Wbp11	271.772	-0.131134	0.0912459	-1.43715	0.150676	0.818518	Coding
[truncated: 13,650 more rows]

## Sheet: aTGFb vs ctr
	baseMean	log2FoldChange	lfcSE	stat	pvalue	padj	type
[truncated: 14,550 more rows]

## Sheet:  aTGFb vs aPD-L1 
	baseMean	log2FoldChange	lfcSE	stat	pvalue	padj	type
[truncated: 15,736 more rows]

[truncated: 1 more sheets: aPD-L1 vs ctr]
