# Supplementary material for: Combined PD-L1/TGFβ blockade allows expansion and differentiation of stem cell-like CD8 T cells in immune excluded tumors
Source: Nat Commun. 2023 Aug 5;14:4703. doi: 10.1038/s41467-023-40398-4 (PMC10404279; doi:10.1038/s41467-023-40398-4)
Supplement: Supplementary file 6 — Supplementary Data 4 [file 41467_2023_40398_MOESM6_ESM.xlsx]

## Sheet: CD8_marker_clusters
	p_val	avg_logFC	pct.1	pct.2	p_val_adj	cluster	gene
Igfbp7	0	1.04573	0.444	0.113	0	0	Igfbp7
Sdf4	0	0.867347	0.948	0.763	0	0	Sdf4
Gpm6b	0	0.86325	0.509	0.148	0	0	Gpm6b
Lag3	0	0.703022	0.892	0.612	0	0	Lag3
Tpt1	4.98885e-297	0.322663	1	0.998	1.04661e-292	0	Tpt1
Hif1a	3.92086e-296	0.640066	0.936	0.783	8.22557e-292	0	Hif1a
Ccr7	1.29171e-285	1.47785	0.418	0.117	2.70989e-281	0	Ccr7
Ndfip1	5.31923e-280	0.502807	0.977	0.883	1.11592e-275	0	Ndfip1
Rpl34	4.26776e-271	0.333936	1	0.997	8.95334e-267	0	Rpl34
Ccr8	2.94199e-263	0.813164	0.451	0.155	6.17201e-259	0	Ccr8
Ptms	3.9689e-254	0.629419	0.843	0.624	8.32636e-250	0	Ptms
Sat1	4.40924e-235	0.726251	0.754	0.522	9.25014e-231	0	Sat1
Tnfrsf4	3.02604e-227	0.770626	0.548	0.259	6.34833e-223	0	Tnfrsf4
Klrd1	6.03215e-217	0.501808	0.958	0.833	1.26549e-212	0	Klrd1
Cst7	1.28569e-211	0.589227	0.834	0.659	2.69725e-207	0	Cst7
Bdh2	1.02066e-209	0.658326	0.258	0.053	2.14124e-205	0	Bdh2
Fkbp1a	3.82649e-185	0.466925	0.903	0.772	8.02759e-181	0	Fkbp1a
H2-K2	4.71995e-181	0.348234	0.984	0.948	9.90199e-177	0	H2-K2
Inpp4b	2.62174e-179	0.552397	0.783	0.598	5.50014e-175	0	Inpp4b
Zfp36l1	3.67625e-169	0.535911	0.808	0.645	7.7124e-165	0	Zfp36l1
Bace2	7.61106e-169	0.432627	0.172	0.025	1.59672e-164	0	Bace2
Cd53	1.08569e-165	0.431429	0.941	0.872	2.27768e-161	0	Cd53
Slc17a6	5.50749e-144	0.687927	0.442	0.215	1.15542e-139	0	Slc17a6
Cd200	2.03011e-141	0.701065	0.511	0.31	4.25896e-137	0	Cd200
Creb3l2	5.66837e-132	0.499397	0.246	0.08	1.18917e-127	0	Creb3l2
Glud1	1.78994e-128	0.549367	0.757	0.642	3.75511e-124	0	Glud1
Fam162a	1.17969e-125	0.545723	0.624	0.457	2.47488e-121	0	Fam162a
Eif3h	1.00621e-121	0.293229	0.96	0.905	2.11093e-117	0	Eif3h
Wipf1	4.02035e-119	0.480022	0.706	0.564	8.43429e-115	0	Wipf1
Bhlhe40	4.18215e-119	0.516278	0.827	0.686	8.77372e-115	0	Bhlhe40
Ltb	2.06543e-117	0.338736	0.912	0.81	4.33306e-113	0	Ltb
Stat3	6.06851e-117	0.484538	0.752	0.61	1.27311e-112	0	Stat3
Sp140	2.19288e-112	0.492002	0.639	0.479	4.60044e-108	0	Sp140
Klrk1	3.41724e-112	0.360726	0.836	0.715	7.16903e-108	0	Klrk1
Nt5e	1.48901e-110	0.435322	0.251	0.092	3.12378e-106	0	Nt5e
Tnfrsf18	2.18029e-108	0.445952	0.731	0.595	4.57404e-104	0	Tnfrsf18
Nfat5	6.18732e-107	0.519764	0.441	0.268	1.29804e-102	0	Nfat5
Ctla4	2.93407e-105	0.55818	0.608	0.423	6.15539e-101	0	Ctla4
Cd8a	1.77483e-104	0.307941	0.952	0.839	3.72342e-100	0	Cd8a
Pfdn5	2.1681e-102	0.277408	0.935	0.892	4.54845e-98	0	Pfdn5
Tigit	2.83729e-101	0.437709	0.686	0.537	5.95235e-97	0	Tigit
Bach2	4.01526e-98	0.387575	0.247	0.096	8.42361e-94	0	Bach2
Anxa5	2.83261e-97	0.47412	0.626	0.499	5.94254e-93	0	Anxa5
Serpina3f	4.50481e-96	0.537673	0.247	0.099	9.45064e-92	0	Serpina3f
Flnb	2.392e-95	0.546221	0.289	0.136	5.01817e-91	0	Flnb
Gdi2	4.35904e-95	0.398667	0.814	0.721	9.14483e-91	0	Gdi2
Dap	9.39699e-92	0.417709	0.686	0.546	1.9714e-87	0	Dap
Pdcd1	2.6711e-89	0.333526	0.854	0.696	5.60369e-85	0	Pdcd1
Mrps6	2.54501e-88	0.466832	0.552	0.415	5.33918e-84	0	Mrps6
Nrgn	9.11608e-87	0.433161	0.549	0.37	1.91246e-82	0	Nrgn
Phf20l1	1.21579e-85	0.425864	0.631	0.511	2.55061e-81	0	Phf20l1
Cd82	7.50001e-84	0.352544	0.692	0.567	1.57343e-79	0	Cd82
Tmem123	2.87014e-80	0.401753	0.635	0.53	6.02126e-76	0	Tmem123
H2-Q1	2.15283e-79	0.367691	0.636	0.518	4.51641e-75	0	H2-Q1
Arl4d	4.23348e-78	0.28386	0.146	0.043	8.88143e-74	0	Arl4d
Ramp3	4.90826e-78	0.327095	0.165	0.052	1.0297e-73	0	Ramp3
Samsn1	7.80197e-78	0.396262	0.635	0.517	1.63678e-73	0	Samsn1
Prelid2	4.01448e-75	0.423489	0.462	0.319	8.42198e-71	0	Prelid2
Plscr1	7.55836e-75	0.454871	0.432	0.298	1.58567e-70	0	Plscr1
Msi2	3.81384e-74	0.423183	0.407	0.268	8.00106e-70	0	Msi2
Tiam1	4.69203e-74	0.306368	0.143	0.044	9.84341e-70	0	Tiam1
Il18r1	2.67655e-73	0.373318	0.55	0.407	5.61513e-69	0	Il18r1
1700019D03Rik	2.47726e-72	0.283121	0.111	0.027	5.19703e-68	0	1700019D03Rik
Ccnd2	2.68496e-72	0.354331	0.616	0.482	5.63277e-68	0	Ccnd2
Dbi	4.58622e-72	0.653346	0.624	0.52	9.62144e-68	0	Dbi
Itm2c	9.94563e-72	0.374719	0.553	0.425	2.08649e-67	0	Itm2c
Xdh	1.23019e-71	0.436894	0.332	0.194	2.58082e-67	0	Xdh
Lrch1	2.77199e-71	0.430452	0.465	0.333	5.81536e-67	0	Lrch1
Tnfsf11	3.03848e-71	0.479031	0.274	0.139	6.37443e-67	0	Tnfsf11
Dusp4	2.0854e-70	0.454273	0.523	0.396	4.37496e-66	0	Dusp4
Anp32a	9.1668e-70	0.330582	0.771	0.688	1.9231e-65	0	Anp32a
Pou2f2	6.96636e-69	0.350504	0.258	0.125	1.46147e-64	0	Pou2f2
St6galnac3	4.09587e-68	0.277131	0.153	0.052	8.59273e-64	0	St6galnac3
Mdfic	4.48634e-68	0.396526	0.491	0.371	9.41189e-64	0	Mdfic
Kif13b	7.29471e-68	0.404591	0.319	0.187	1.53036e-63	0	Kif13b
Ms4a4c	1.46458e-67	0.394722	0.318	0.173	3.07254e-63	0	Ms4a4c
Ostf1	2.38208e-65	0.292723	0.871	0.823	4.99736e-61	0	Ostf1
Il18rap	3.74482e-65	0.389853	0.533	0.409	7.85626e-61	0	Il18rap
Timp2	3.83464e-64	0.274209	0.137	0.044	8.04469e-60	0	Timp2
Vamp8	1.11588e-62	0.335506	0.674	0.591	2.34101e-58	0	Vamp8
Marcksl1	1.83667e-62	0.377101	0.15	0.055	3.85314e-58	0	Marcksl1
Slc9b2	4.41383e-60	0.274568	0.139	0.049	9.25978e-56	0	Slc9b2
Akap13	7.80464e-60	0.315356	0.716	0.643	1.63734e-55	0	Akap13
Tes	8.4844e-59	0.300935	0.735	0.661	1.77994e-54	0	Tes
Ap3b1	4.8008e-57	0.447029	0.508	0.41	1.00716e-52	0	Ap3b1
Pglyrp1	1.32783e-55	0.33365	0.659	0.537	2.78566e-51	0	Pglyrp1
Rabgap1l	9.71107e-55	0.347598	0.557	0.463	2.03728e-50	0	Rabgap1l
Paip2	1.57107e-53	0.301547	0.626	0.544	3.29595e-49	0	Paip2
Kdm5b	4.71557e-53	0.280128	0.232	0.119	9.8928e-49	0	Kdm5b
Ccni	5.98513e-53	0.338818	0.527	0.438	1.25562e-48	0	Ccni
Gypc	2.17353e-51	0.290695	0.222	0.115	4.55984e-47	0	Gypc
Sla	7.62343e-51	0.347571	0.567	0.462	1.59932e-46	0	Sla
Wisp1	7.5817e-49	0.330395	0.184	0.089	1.59056e-44	0	Wisp1
Stat4	1.07511e-48	0.292083	0.556	0.456	2.25548e-44	0	Stat4
Vgll4	6.116e-47	0.361671	0.433	0.332	1.28307e-42	0	Vgll4
Spry1	7.75294e-47	0.340965	0.221	0.118	1.62649e-42	0	Spry1
Tmbim1	3.16124e-46	0.348622	0.222	0.124	6.63196e-42	0	Tmbim1
Fcho2	5.97685e-46	0.329757	0.301	0.193	1.25388e-41	0	Fcho2
Pnrc1	6.7095e-46	0.250675	0.692	0.622	1.40759e-41	0	Pnrc1
Kit	8.31112e-46	0.283857	0.141	0.06	1.74359e-41	0	Kit
Ptger2	8.43832e-46	0.317368	0.207	0.11	1.77028e-41	0	Ptger2
Tg	5.06846e-45	0.435469	0.169	0.083	1.06331e-40	0	Tg
Rnf19a	1.60154e-44	0.334056	0.357	0.252	3.35987e-40	0	Rnf19a
Ptprs	1.08444e-43	0.324428	0.214	0.12	2.27505e-39	0	Ptprs
Bmpr2	1.92086e-43	0.303731	0.158	0.074	4.02978e-39	0	Bmpr2
Orai1	3.82034e-42	0.345507	0.405	0.306	8.0147e-38	0	Orai1
Etv6	9.01988e-42	0.304567	0.251	0.151	1.89228e-37	0	Etv6
Cd28	1.7621e-40	0.294383	0.597	0.527	3.69671e-36	0	Cd28
Sdcbp2	4.57478e-40	0.33692	0.24	0.144	9.59744e-36	0	Sdcbp2
Sqstm1	5.61337e-40	0.256466	0.686	0.624	1.17763e-35	0	Sqstm1
Cnih2	1.35596e-39	0.262644	0.213	0.117	2.84467e-35	0	Cnih2
Alcam	1.69894e-39	0.323411	0.4	0.307	3.56422e-35	0	Alcam
Sema4c	1.89737e-38	0.280401	0.156	0.079	3.9805e-34	0	Sema4c
Kdm2b	5.22385e-38	0.311017	0.332	0.238	1.09591e-33	0	Kdm2b
Elk3	6.75565e-38	0.344832	0.358	0.271	1.41727e-33	0	Elk3
Cd9	3.61565e-37	0.307571	0.267	0.169	7.58526e-33	0	Cd9
Max	3.97692e-37	0.289987	0.471	0.394	8.34318e-33	0	Max
Pdcd1lg2	5.64838e-37	0.342947	0.348	0.261	1.18497e-32	0	Pdcd1lg2
Hivep1	9.12892e-37	0.285069	0.22	0.132	1.91516e-32	0	Hivep1
Eea1	1.52048e-36	0.351109	0.4	0.314	3.18982e-32	0	Eea1
Irf4	3.18876e-36	0.383126	0.317	0.224	6.6897e-32	0	Irf4
Nrn1	9.39687e-36	0.419205	0.32	0.219	1.97137e-31	0	Nrn1
Nudt4	4.16966e-35	0.397922	0.315	0.231	8.74753e-31	0	Nudt4
Adipor2	8.9432e-35	0.338153	0.392	0.316	1.87619e-30	0	Adipor2
Pik3r1	1.46179e-33	0.274555	0.418	0.334	3.0667e-29	0	Pik3r1
Arap2	2.25175e-33	0.324438	0.378	0.291	4.72394e-29	0	Arap2
Arid5b	3.16682e-33	0.307286	0.359	0.272	6.64367e-29	0	Arid5b
Rgs16	8.34257e-33	0.264643	0.704	0.572	1.75019e-28	0	Rgs16
Clint1	3.85482e-32	0.255079	0.481	0.404	8.08703e-28	0	Clint1
Chic2	5.50608e-31	0.277047	0.449	0.384	1.15512e-26	0	Chic2
Tgfb1	6.69764e-31	0.305857	0.653	0.604	1.4051e-26	0	Tgfb1
Upp1	1.17135e-30	0.264827	0.109	0.049	2.45738e-26	0	Upp1
Wls	1.64972e-30	0.27386	0.237	0.156	3.46094e-26	0	Wls
Cst3	1.14438e-29	0.538506	0.63	0.589	2.40079e-25	0	Cst3
Ptpn1	2.48401e-29	0.2976	0.463	0.41	5.2112e-25	0	Ptpn1
Ankrd46	6.74106e-29	0.251654	0.214	0.139	1.41421e-24	0	Ankrd46
Impa2	1.68873e-27	0.324902	0.409	0.346	3.5428e-23	0	Impa2
Gm17745	2.32064e-27	0.270183	0.22	0.145	4.86846e-23	0	Gm17745
Gm156	2.48338e-27	0.384029	0.125	0.063	5.20989e-23	0	Gm156
Phactr2	3.35193e-27	0.306818	0.244	0.173	7.032e-23	0	Phactr2
Nr4a2	9.44293e-27	0.293905	0.484	0.409	1.98103e-22	0	Nr4a2
Chst12	1.19061e-26	0.301427	0.357	0.295	2.49778e-22	0	Chst12
Acot9	1.27571e-26	0.288738	0.311	0.244	2.67631e-22	0	Acot9
Serpinb6a	1.20716e-25	0.263286	0.494	0.447	2.53251e-21	0	Serpinb6a
Stx6	4.63074e-25	0.255973	0.273	0.201	9.71483e-21	0	Stx6
Serpinb9b	1.17302e-24	0.522994	0.178	0.108	2.46088e-20	0	Serpinb9b
Atf3	3.03037e-24	0.293739	0.169	0.101	6.35741e-20	0	Atf3
Twsg1	4.67641e-24	0.26792	0.205	0.139	9.81063e-20	0	Twsg1
Tnfaip8	9.88945e-24	0.268344	0.328	0.262	2.07471e-19	0	Tnfaip8
Itpr1	1.47508e-23	0.27573	0.273	0.206	3.09456e-19	0	Itpr1
Tmem171	6.0289e-23	0.288797	0.186	0.121	1.2648e-18	0	Tmem171
Nfkb1	1.11053e-22	0.252065	0.388	0.33	2.32979e-18	0	Nfkb1
Spint2	8.80918e-22	0.264279	0.374	0.325	1.84808e-17	0	Spint2
Ptpn11	8.58613e-21	0.285246	0.304	0.247	1.80128e-16	0	Ptpn11
Ece1	8.76394e-21	0.280958	0.385	0.335	1.83859e-16	0	Ece1
Uhrf2	1.71286e-20	0.291099	0.354	0.301	3.59341e-16	0	Uhrf2
Ly75	1.81205e-19	0.261752	0.278	0.218	3.8015e-15	0	Ly75
Pde4d	2.80669e-19	0.260944	0.323	0.267	5.88816e-15	0	Pde4d
Hacd2	5.04641e-19	0.321352	0.347	0.301	1.05869e-14	0	Hacd2
Selenos	5.45866e-19	0.267011	0.466	0.432	1.14517e-14	0	Selenos
Slco4a1	2.17991e-18	0.26756	0.209	0.153	4.57324e-14	0	Slco4a1
Ubash3b	1.03007e-17	0.266896	0.314	0.267	2.16098e-13	0	Ubash3b
Gzme	3.70429e-17	0.463331	0.174	0.115	7.77122e-13	0	Gzme
Cx3cr1	1.45232e-14	0.304724	0.165	0.115	3.04681e-10	0	Cx3cr1
Klre1	1.12219e-13	0.275346	0.325	0.282	2.35424e-09	0	Klre1
Gzmd	1.65768e-12	0.372091	0.182	0.13	3.47765e-08	0	Gzmd
Kif15	2.0342e-12	0.257157	0.27	0.229	4.26754e-08	0	Kif15
Ccl5	0	1.79738	0.809	0.415	0	1	Ccl5
Ccr2	0	1.2658	0.461	0.133	0	1	Ccr2
Cxcr3	0	1.09823	0.452	0.107	0	1	Cxcr3
Malat1	1.6735e-306	0.645213	0.997	0.998	3.51084e-302	1	Malat1
Ly6c2	6.89453e-306	1.38128	0.643	0.305	1.4464e-301	1	Ly6c2
Gm42418	3.03227e-299	0.561465	1	1	6.36139e-295	1	Gm42418
Klf2	3.03084e-293	1.51185	0.39	0.094	6.35841e-289	1	Klf2
Ms4a6b	9.35924e-261	0.619596	0.913	0.914	1.96347e-256	1	Ms4a6b
Ms4a4b	3.2317e-229	0.517264	0.976	0.974	6.77978e-225	1	Ms4a4b
Gimap3	6.26652e-219	0.752618	0.816	0.792	1.31465e-214	1	Gimap3
Rps27	3.22594e-203	0.367971	0.999	0.997	6.7677e-199	1	Rps27
Hcst	7.72397e-199	0.65744	0.85	0.864	1.62041e-194	1	Hcst
Ifngr1	9.01746e-191	0.809679	0.77	0.689	1.89177e-186	1	Ifngr1
S1pr1	3.03462e-177	0.735729	0.203	0.034	6.36633e-173	1	S1pr1
Itgb7	2.82738e-169	0.852685	0.408	0.174	5.93155e-165	1	Itgb7
Arhgdib	4.59331e-169	0.454342	0.913	0.918	9.6363e-165	1	Arhgdib
Sp100	4.33115e-158	0.639745	0.762	0.728	9.08631e-154	1	Sp100
Ifi203	1.78383e-138	0.685469	0.649	0.529	3.74229e-134	1	Ifi203
mt-Rnr2	1.72499e-134	0.359923	0.994	0.997	3.61885e-130	1	mt-Rnr2
Ifi208	1.84685e-129	0.680611	0.382	0.172	3.8745e-125	1	Ifi208
Emb	2.98811e-122	0.78573	0.474	0.28	6.26876e-118	1	Emb
Klf3	1.21594e-121	0.73997	0.191	0.047	2.55091e-117	1	Klf3
Rtp4	3.26242e-120	0.669969	0.307	0.119	6.84424e-116	1	Rtp4
Zfp36l2	1.27494e-114	0.939498	0.573	0.462	2.67469e-110	1	Zfp36l2
Ubb	3.94991e-109	0.466043	0.988	0.992	8.28652e-105	1	Ubb
Gzmk	4.19167e-105	1.01567	0.313	0.143	8.79369e-101	1	Gzmk
S100a10	3.21354e-103	0.475948	0.909	0.94	6.74169e-99	1	S100a10
Ly6c1	4.43666e-102	0.73168	0.29	0.125	9.30767e-98	1	Ly6c1
Gimap6	3.60253e-101	0.769048	0.602	0.535	7.55775e-97	1	Gimap6
Ripor2	6.78847e-93	0.698779	0.29	0.131	1.42415e-88	1	Ripor2
Gramd3	1.27299e-92	0.738203	0.358	0.2	2.6706e-88	1	Gramd3
Gm45552	1.34041e-91	0.490298	0.138	0.031	2.81204e-87	1	Gm45552
Gimap4	5.4816e-86	0.538221	0.727	0.753	1.14998e-81	1	Gimap4
Samhd1	3.13195e-83	0.628895	0.507	0.389	6.57053e-79	1	Samhd1
Selplg	3.15585e-83	0.384904	0.815	0.851	6.62066e-79	1	Selplg
Arhgap45	2.31459e-80	0.542628	0.667	0.674	4.85578e-76	1	Arhgap45
Ptprc	3.64316e-74	0.311937	0.894	0.943	7.64298e-70	1	Ptprc
Tcf7	6.31949e-70	0.577473	0.174	0.062	1.32577e-65	1	Tcf7
Rasa3	1.08531e-69	0.630653	0.257	0.127	2.27687e-65	1	Rasa3
Cd7	3.67512e-64	0.656783	0.194	0.08	7.71003e-60	1	Cd7
Rasgrp2	4.09761e-62	0.48666	0.132	0.042	8.59637e-58	1	Rasgrp2
Emp3	8.39851e-62	0.609426	0.599	0.578	1.76192e-57	1	Emp3
Lat	2.34008e-61	0.370789	0.77	0.827	4.90925e-57	1	Lat
Irf7	1.0285e-58	0.566186	0.335	0.204	2.15769e-54	1	Irf7
Gimap7	1.47146e-58	0.67383	0.543	0.514	3.08697e-54	1	Gimap7
Irf1	3.10431e-58	0.658958	0.471	0.392	6.51252e-54	1	Irf1
Atp10d	7.39147e-57	0.536585	0.181	0.078	1.55066e-52	1	Atp10d
Gm8995	1.21315e-55	0.560327	0.593	0.592	2.54507e-51	1	Gm8995
Cyba	3.0248e-55	0.37779	0.771	0.834	6.34572e-51	1	Cyba
Hspa1b	3.69458e-54	0.87358	0.56	0.473	7.75086e-50	1	Hspa1b
Itgb1	6.09026e-54	0.643706	0.643	0.686	1.27768e-49	1	Itgb1
Apbb1ip	1.91562e-52	0.601422	0.493	0.456	4.01877e-48	1	Apbb1ip
Skap1	5.83863e-51	0.361666	0.726	0.795	1.22489e-46	1	Skap1
Itm2b	8.87687e-50	0.257325	0.854	0.943	1.86228e-45	1	Itm2b
St3gal6	2.25029e-46	0.496975	0.171	0.08	4.72088e-42	1	St3gal6
Cd2	7.70772e-46	0.407141	0.648	0.673	1.617e-41	1	Cd2
Itga4	5.33555e-45	0.81254	0.315	0.223	1.11935e-40	1	Itga4
Txnip	2.40684e-44	0.593648	0.482	0.425	5.0493e-40	1	Txnip
Cmah	8.40285e-43	0.36403	0.11	0.039	1.76283e-38	1	Cmah
Ly9	3.2305e-42	0.481091	0.183	0.093	6.77726e-38	1	Ly9
Slamf6	4.47248e-41	0.533849	0.225	0.128	9.38282e-37	1	Slamf6
Tbc1d10c	1.06732e-40	0.504544	0.541	0.554	2.23912e-36	1	Tbc1d10c
Slfn1	1.124e-40	0.48986	0.384	0.291	2.35803e-36	1	Slfn1
Fyb	4.44442e-40	0.410347	0.631	0.682	9.32395e-36	1	Fyb
Tsc22d3	4.9841e-40	0.63126	0.293	0.2	1.04561e-35	1	Tsc22d3
Ptpn18	3.70816e-39	0.391165	0.667	0.728	7.77935e-35	1	Ptpn18
Slc9a9	4.13283e-39	0.519946	0.231	0.141	8.67027e-35	1	Slc9a9
Hspa1a	5.21886e-39	0.854823	0.456	0.367	1.09486e-34	1	Hspa1a
Sgk1	2.63971e-38	0.668251	0.229	0.141	5.53784e-34	1	Sgk1
Slamf7	2.75994e-38	0.522053	0.258	0.164	5.79007e-34	1	Slamf7
Zfp36	5.50571e-38	0.894986	0.353	0.271	1.15504e-33	1	Zfp36
Ctsw	6.37354e-38	0.298276	0.774	0.805	1.3371e-33	1	Ctsw
Rnf138	1.22221e-36	0.670551	0.398	0.356	2.56408e-32	1	Rnf138
Klf6	1.73001e-36	0.734632	0.516	0.514	3.62938e-32	1	Klf6
Slfn2	6.8945e-36	0.413647	0.623	0.653	1.4464e-31	1	Slfn2
mt-Rnr1	2.49466e-35	0.386127	0.793	0.873	5.23356e-31	1	mt-Rnr1
Dnajb1	2.7477e-34	0.999179	0.477	0.446	5.76439e-30	1	Dnajb1
Abcb1a	2.16425e-33	0.464956	0.175	0.096	4.54038e-29	1	Abcb1a
Ifi27l2a	2.24043e-33	0.404831	0.64	0.604	4.7002e-29	1	Ifi27l2a
Gzma	3.18422e-33	0.586944	0.189	0.101	6.68019e-29	1	Gzma
Ppp1r12a	5.45472e-33	0.513551	0.509	0.53	1.14434e-28	1	Ppp1r12a
Arl4c	8.80553e-33	0.527085	0.248	0.166	1.84731e-28	1	Arl4c
Cnn2	2.51973e-32	0.286898	0.72	0.808	5.28614e-28	1	Cnn2
Chd3	4.6762e-32	0.53634	0.272	0.193	9.81019e-28	1	Chd3
Ccr5	1.18264e-30	0.59913	0.353	0.289	2.48106e-26	1	Ccr5
Bin2	1.26924e-30	0.471206	0.544	0.594	2.66274e-26	1	Bin2
Selenow	3.87154e-30	0.259346	0.747	0.845	8.1221e-26	1	Selenow
Ifi214	1.5466e-29	0.34782	0.233	0.147	3.24461e-25	1	Ifi214
Adgre5	2.6741e-29	0.498725	0.475	0.462	5.61e-25	1	Adgre5
Tpst2	8.65171e-29	0.525031	0.354	0.306	1.81504e-24	1	Tpst2
Btg1	1.49063e-28	0.359539	0.769	0.861	3.12719e-24	1	Btg1
Gpr183	2.43544e-28	0.611637	0.407	0.368	5.10931e-24	1	Gpr183
Saraf	3.09941e-28	0.454661	0.504	0.529	6.50226e-24	1	Saraf
Cd37	5.36473e-28	0.371261	0.585	0.659	1.12547e-23	1	Cd37
Pag1	4.60284e-27	0.381348	0.15	0.083	9.6563e-23	1	Pag1
Sidt1	1.47624e-25	0.523419	0.217	0.149	3.097e-21	1	Sidt1
Zbp1	4.34972e-25	0.49774	0.389	0.351	9.12527e-21	1	Zbp1
A430078G23Rik	1.04222e-24	0.319292	0.107	0.052	2.18648e-20	1	A430078G23Rik
2021-09-01	1.92631e-24	0.273218	0.705	0.823	4.0412e-20	1	2021-09-01
Gmfg	5.92801e-24	0.327759	0.649	0.749	1.24364e-19	1	Gmfg
Ltb1	6.74636e-24	0.255106	0.783	0.853	1.41532e-19	1	Ltb
Samd9l	2.55415e-23	0.460982	0.355	0.313	5.35834e-19	1	Samd9l
Ahnak	5.7239e-23	0.513969	0.601	0.69	1.20082e-18	1	Ahnak
Itk	6.4307e-23	0.350161	0.625	0.726	1.3491e-18	1	Itk
Cd69	2.6038e-22	0.700059	0.383	0.353	5.46252e-18	1	Cd69
Gimap8	4.77471e-21	0.458614	0.412	0.406	1.00169e-16	1	Gimap8
Scand1	8.64864e-21	0.339829	0.646	0.766	1.8144e-16	1	Scand1
Mbp	1.85023e-20	0.429188	0.208	0.148	3.88159e-16	1	Mbp
Arhgap26	3.20692e-20	0.380886	0.189	0.129	6.7278e-16	1	Arhgap26
Arl6ip5	4.19144e-20	0.32084	0.612	0.722	8.79323e-16	1	Arl6ip5
Npc2	1.21702e-19	0.314873	0.612	0.726	2.55319e-15	1	Npc2
Ppp1r18	2.50702e-19	0.295891	0.65	0.765	5.25949e-15	1	Ppp1r18
Fos	2.96565e-18	0.769773	0.227	0.171	6.22163e-14	1	Fos
Gpr132	5.11142e-18	0.447965	0.22	0.166	1.07232e-13	1	Gpr132
Igtp	1.66309e-17	0.485211	0.382	0.361	3.489e-13	1	Igtp
Pik3r5	3.04567e-17	0.361451	0.16	0.107	6.38951e-13	1	Pik3r5
Epsti1	3.52059e-17	0.462757	0.449	0.476	7.38585e-13	1	Epsti1
Lime1	5.11744e-17	0.3081	0.621	0.731	1.07359e-12	1	Lime1
Lef1	5.47774e-17	0.474575	0.203	0.151	1.14918e-12	1	Lef1
Hopx	7.68439e-17	0.51046	0.387	0.38	1.61211e-12	1	Hopx
Crip1	9.42497e-17	0.48069	0.764	0.854	1.97727e-12	1	Crip1
Acp5	1.45535e-16	0.413422	0.201	0.15	3.05317e-12	1	Acp5
Ifi47	9.63488e-16	0.404779	0.486	0.523	2.0213e-11	1	Ifi47
S1pr4	4.67461e-15	0.453075	0.22	0.176	9.80687e-11	1	S1pr4
Fam189b	6.1408e-15	0.417917	0.251	0.21	1.28828e-10	1	Fam189b
Mndal	8.3192e-15	0.424664	0.374	0.37	1.74528e-10	1	Mndal
Cd48	2.42524e-14	0.362856	0.545	0.642	5.08791e-10	1	Cd48
Sntb1	2.98546e-14	0.345318	0.15	0.104	6.26319e-10	1	Sntb1
St8sia4	6.07902e-14	0.383369	0.186	0.141	1.27532e-09	1	St8sia4
Rcbtb2	1.03442e-13	0.294296	0.115	0.073	2.17011e-09	1	Rcbtb2
Socs3	1.42976e-13	0.394194	0.126	0.082	2.99949e-09	1	Socs3
Btg2	2.295e-13	0.450735	0.495	0.54	4.81469e-09	1	Btg2
Anxa1	2.55623e-13	0.486197	0.22	0.177	5.36272e-09	1	Anxa1
Ankrd11	2.76109e-13	0.383051	0.499	0.575	5.79248e-09	1	Ankrd11
AC121801.1	5.3324e-13	0.356265	0.145	0.102	1.11868e-08	1	AC121801.1
Dgka	1.00083e-12	0.42995	0.39	0.402	2.09964e-08	1	Dgka
Gbp2	1.08694e-12	0.389951	0.32	0.294	2.28029e-08	1	Gbp2
Pja1	1.09745e-12	0.467024	0.186	0.145	2.30235e-08	1	Pja1
Slc9a3r1	1.6652e-12	0.397382	0.444	0.496	3.49342e-08	1	Slc9a3r1
Rora	3.35112e-12	0.374829	0.26	0.221	7.03031e-08	1	Rora
AB124611	4.45668e-12	0.34926	0.168	0.126	9.34968e-08	1	AB124611
Smpdl3a	5.5016e-12	0.414745	0.232	0.197	1.15418e-07	1	Smpdl3a
Tcp11l2	6.12671e-12	0.340111	0.145	0.104	1.28532e-07	1	Tcp11l2
Cd40lg	6.50915e-12	0.301905	0.136	0.093	1.36556e-07	1	Cd40lg
Ccnd3	1.02251e-11	0.398316	0.458	0.519	2.14513e-07	1	Ccnd3
Sit1	2.04569e-11	0.361351	0.18	0.141	4.29165e-07	1	Sit1
Stk17b	4.35395e-11	0.389048	0.493	0.584	9.13414e-07	1	Stk17b
Tagap	7.48133e-11	0.420144	0.212	0.173	1.56951e-06	1	Tagap
Ppp1r15a	1.48999e-10	0.496646	0.4	0.421	3.12585e-06	1	Ppp1r15a
Prex1	1.78231e-10	0.392161	0.218	0.187	3.73912e-06	1	Prex1
Trp53inp1	2.47348e-10	0.296344	0.142	0.103	5.18911e-06	1	Trp53inp1
Smap1	7.5251e-10	0.410054	0.462	0.543	1.57869e-05	1	Smap1
Dnaja1	1.1021e-09	0.489815	0.549	0.677	2.3121e-05	1	Dnaja1
Il16	1.23386e-09	0.387596	0.285	0.271	2.58851e-05	1	Il16
Tob1	2.46879e-09	0.287051	0.118	0.084	5.17927e-05	1	Tob1
Pim1	2.61109e-09	0.408821	0.346	0.34	5.47781e-05	1	Pim1
Sytl1	2.90936e-09	0.312006	0.145	0.112	6.10355e-05	1	Sytl1
Grap	5.22357e-09	0.413086	0.343	0.358	0.000109585	1	Grap
Ubc	5.89403e-09	0.528674	0.383	0.407	0.000123651	1	Ubc
Pdcd4	6.01182e-09	0.385861	0.361	0.374	0.000126122	1	Pdcd4
Glipr2	6.31566e-09	0.380271	0.426	0.485	0.000132496	1	Glipr2
Stk38	6.58243e-09	0.429357	0.265	0.253	0.000138093	1	Stk38
Rab8a	1.55906e-08	0.371559	0.452	0.534	0.000327075	1	Rab8a
Jak1	1.8513e-08	0.253195	0.627	0.776	0.000388384	1	Jak1
Clec2d	2.7382e-08	0.352051	0.454	0.507	0.000574447	1	Clec2d
Runx1	4.08478e-08	0.27046	0.116	0.086	0.000856946	1	Runx1
Il7r	6.61399e-08	0.565816	0.481	0.557	0.00138755	1	Il7r
Xrn2	9.00556e-08	0.374226	0.448	0.532	0.00188928	1	Xrn2
Ablim1	1.92051e-07	0.319217	0.497	0.597	0.00402904	1	Ablim1
Arhgap15	2.05051e-07	0.376672	0.381	0.423	0.00430176	1	Arhgap15
Vrk3	2.51814e-07	0.290046	0.142	0.114	0.0052828	1	Vrk3
Supt4a	3.27857e-07	0.333236	0.492	0.598	0.00687811	1	Supt4a
Ifi209	1.25369e-06	0.268719	0.199	0.173	0.0263011	1	Ifi209
Pnrc11	1.33975e-06	0.319167	0.55	0.666	0.0281067	1	Pnrc1
Jakmip1.1	1.61183e-06	0.264941	0.128	0.102	0.0338145	1	Jakmip1.1
Gm12250	3.94564e-06	0.279366	0.115	0.089	0.0827756	1	Gm12250
Gpsm3	5.45005e-06	0.255812	0.542	0.68	0.114337	1	Gpsm3
Ptpn4	5.7317e-06	0.277365	0.116	0.092	0.120245	1	Ptpn4
Mxd1	7.68797e-06	0.361096	0.182	0.162	0.161286	1	Mxd1
Gm37376	8.07318e-06	0.44753	0.342	0.355	0.169367	1	Gm37376
Junb	1.23483e-05	0.27623	0.608	0.703	0.259056	1	Junb
Themis	1.40604e-05	0.358818	0.401	0.462	0.294972	1	Themis
Cdc42ep3	1.53523e-05	0.331103	0.164	0.145	0.322075	1	Cdc42ep3
Ier2	1.66971e-05	0.517054	0.392	0.452	0.350289	1	Ier2
Zcchc11	1.77354e-05	0.375393	0.311	0.328	0.372072	1	Zcchc11
Dock2	1.97778e-05	0.299392	0.5	0.621	0.414918	1	Dock2
Dusp5	1.9919e-05	0.255887	0.26	0.366	0.41788	1	Dusp5
Bst2	2.22258e-05	0.326201	0.319	0.334	0.466275	1	Bst2
Gimap9	2.25968e-05	0.409069	0.321	0.352	0.474058	1	Gimap9
Gm4759	2.48697e-05	0.369636	0.265	0.266	0.521742	1	Gm4759
Ier5	3.15313e-05	0.419608	0.278	0.285	0.661495	1	Ier5
Stk10	3.20678e-05	0.346268	0.367	0.414	0.672751	1	Stk10
Klhl6	3.47467e-05	0.398183	0.247	0.249	0.728951	1	Klhl6
Polr2a	3.90307e-05	0.264049	0.264	0.381	0.818826	1	Polr2a
Pde4b	4.10912e-05	0.361273	0.316	0.331	0.862052	1	Pde4b
Lbr	4.53208e-05	0.33374	0.353	0.396	0.950784	1	Lbr
Nfatc3	0.000108373	0.388542	0.322	0.357	1	1	Nfatc3
Sorl1	0.000124558	0.28438	0.176	0.161	1	1	Sorl1
Thap3	0.000143553	0.366278	0.188	0.178	1	1	Thap3
AY036118	0.000199033	0.383283	0.47	0.551	1	1	AY036118
Cdkn1b	0.000207403	0.363853	0.365	0.415	1	1	Cdkn1b
Zdhhc18	0.000260135	0.352861	0.272	0.284	1	1	Zdhhc18
Cpne3	0.000262218	0.302209	0.182	0.17	1	1	Cpne3
Tespa1	0.000300839	0.252602	0.149	0.132	1	1	Tespa1
Kif21b	0.000339794	0.307351	0.17	0.158	1	1	Kif21b
Vps37b	0.000444604	0.471779	0.423	0.506	1	1	Vps37b
Xaf1	0.000540763	0.32185	0.253	0.252	1	1	Xaf1
Ypel3	0.000558286	0.318369	0.328	0.357	1	1	Ypel3
Tnfaip8l2	0.000617041	0.325174	0.212	0.209	1	1	Tnfaip8l2
Gpr18	0.000690245	0.28321	0.145	0.13	1	1	Gpr18
Zc3hav1	0.000867447	0.3307	0.413	0.499	1	1	Zc3hav1
Tgtp2	0.000941682	0.299524	0.251	0.251	1	1	Tgtp2
Jun	0.000978885	0.566802	0.361	0.404	1	1	Jun
Tnfaip3	0.00102083	0.434712	0.489	0.601	1	1	Tnfaip3
Dusp1	0.00127108	0.431063	0.253	0.255	1	1	Dusp1
Rnf167	0.00132659	0.355663	0.239	0.249	1	1	Rnf167
Cdc42se2	0.0015856	0.346768	0.301	0.335	1	1	Cdc42se2
Cyth1	0.00191829	0.257212	0.163	0.153	1	1	Cyth1
Pde7a	0.00192069	0.316821	0.163	0.155	1	1	Pde7a
Nsd3	0.00192527	0.315154	0.458	0.572	1	1	Nsd3
Lgals9	0.00304575	0.267807	0.352	0.397	1	1	Lgals9
Commd8	0.0030477	0.302337	0.152	0.144	1	1	Commd8
Atp8b4	0.00309165	0.326861	0.361	0.425	1	1	Atp8b4
Sh2d3c	0.00341079	0.272303	0.159	0.151	1	1	Sh2d3c
Gbp4	0.00377715	0.322685	0.429	0.513	1	1	Gbp4
Tecpr1	0.00404528	0.272838	0.185	0.18	1	1	Tecpr1
Gadd45b	0.00466573	0.331018	0.224	0.217	1	1	Gadd45b
Irgm1	0.00531693	0.287788	0.218	0.221	1	1	Irgm1
P2ry10	0.00595353	0.38158	0.249	0.263	1	1	P2ry10
Irf9	0.00830755	0.315239	0.214	0.221	1	1	Irf9
Havcr2	2.88325e-277	1.08229	0.761	0.337	6.04877e-273	2	Havcr2
Rgs161	1.28203e-270	1.04679	0.927	0.564	2.68957e-266	2	Rgs16
Nkg7	2.88553e-256	0.630969	0.992	0.946	6.05355e-252	2	Nkg7
Ccl3	2.16998e-217	1.46201	0.613	0.232	4.5524e-213	2	Ccl3
Tnfrsf9	7.74951e-204	0.806066	0.942	0.673	1.62577e-199	2	Tnfrsf9
Slc37a2	1.93412e-171	0.693665	0.475	0.163	4.0576e-167	2	Slc37a2
Ccl4	5.97501e-170	0.862187	0.764	0.426	1.2535e-165	2	Ccl4
Klrc1	4.35207e-167	0.493369	0.991	0.856	9.13021e-163	2	Klrc1
Lag31	5.7653e-160	0.668108	0.916	0.656	1.2095e-155	2	Lag3
Aldoa	1.90434e-152	0.591805	0.985	0.911	3.99512e-148	2	Aldoa
Slc13a3	1.55639e-133	0.312244	0.114	0.008	3.26515e-129	2	Slc13a3
Cnih21	2.35417e-123	0.620417	0.353	0.114	4.93881e-119	2	Cnih2
Ifng	1.38522e-110	0.823714	0.755	0.509	2.90606e-106	2	Ifng
Adam8	8.68961e-110	0.536893	0.41	0.164	1.82299e-105	2	Adam8
Ndfip11	1.0736e-109	0.369976	0.984	0.898	2.25231e-105	2	Ndfip1
Serpinb6b	7.39754e-109	0.840297	0.64	0.38	1.55193e-104	2	Serpinb6b
Cxcr6	1.53857e-108	0.464872	0.935	0.75	3.22777e-104	2	Cxcr6
Zbtb32	2.43628e-102	0.64258	0.54	0.291	5.11107e-98	2	Zbtb32
Dusp41	5.10707e-102	0.539188	0.664	0.399	1.07141e-97	2	Dusp4
Pkm	7.35625e-98	0.479458	0.958	0.819	1.54327e-93	2	Pkm
Prf1	5.13822e-94	0.684088	0.688	0.443	1.07795e-89	2	Prf1
Srgn	6.05805e-94	0.382486	0.984	0.953	1.27092e-89	2	Srgn
Gapdh	2.25857e-88	0.463115	0.926	0.792	4.73825e-84	2	Gapdh
Serpine2	7.1977e-84	0.870347	0.285	0.103	1.51001e-79	2	Serpine2
Ccl51	1.15146e-79	0.406977	0.74	0.466	2.41565e-75	2	Ccl5
Klrd11	2.70971e-79	0.4567	0.951	0.855	5.6847e-75	2	Klrd1
Slc2a3	9.11887e-79	0.517228	0.477	0.253	1.91305e-74	2	Slc2a3
Laptm5	2.99049e-76	0.292253	0.988	0.967	6.27374e-72	2	Laptm5
Hilpda	1.44618e-75	0.698276	0.53	0.307	3.03394e-71	2	Hilpda
Cd531	2.78828e-75	0.351197	0.954	0.882	5.84952e-71	2	Cd53
Anxa2	1.37732e-73	0.383776	0.938	0.781	2.88949e-69	2	Anxa2
Lgals3	4.40757e-73	0.453952	0.897	0.714	9.24665e-69	2	Lgals3
Cd8a1	5.67779e-72	0.369557	0.95	0.859	1.19114e-67	2	Cd8a
Entpd1	1.83266e-71	0.504347	0.45	0.241	3.84474e-67	2	Entpd1
Rgs1	8.93455e-71	0.475098	0.826	0.616	1.87438e-66	2	Rgs1
Irf8	9.63295e-71	0.516405	0.642	0.428	2.0209e-66	2	Irf8
Sema7a	1.97382e-70	0.350689	0.252	0.089	4.14087e-66	2	Sema7a
Il12rb2	3.19612e-69	0.472941	0.615	0.404	6.70514e-65	2	Il12rb2
2310031A07Rik	7.15446e-67	0.252522	0.163	0.044	1.50093e-62	2	2310031A07Rik
Zeb2	7.70001e-67	0.417588	0.425	0.218	1.61539e-62	2	Zeb2
Cd3d	3.62912e-66	0.266402	0.981	0.939	7.61353e-62	2	Cd3d
Ier3	1.23725e-63	0.517886	0.479	0.268	2.59563e-59	2	Ier3
Fkbp1a1	4.60681e-63	0.339447	0.908	0.793	9.66462e-59	2	Fkbp1a
Fhl2	1.10973e-62	0.430372	0.404	0.213	2.3281e-58	2	Fhl2
Tpi1	1.23191e-62	0.482672	0.796	0.613	2.58443e-58	2	Tpi1
Cdkn1a	2.29893e-62	0.48209	0.233	0.085	4.82293e-58	2	Cdkn1a
Itgb2	2.39316e-62	0.399749	0.803	0.655	5.02061e-58	2	Itgb2
Ptms1	7.58443e-62	0.36672	0.842	0.662	1.59114e-57	2	Ptms
Tigit1	6.38066e-61	0.380404	0.749	0.554	1.3386e-56	2	Tigit
Gzmb	1.37527e-60	0.82937	0.707	0.493	2.88517e-56	2	Gzmb
Bcl2a1d	1.61164e-60	0.419102	0.631	0.441	3.38107e-56	2	Bcl2a1d
Itgav	5.71817e-60	0.456926	0.623	0.433	1.19961e-55	2	Itgav
Eno1	2.06917e-59	0.43833	0.881	0.762	4.34092e-55	2	Eno1
Myl6	4.99459e-59	0.251754	0.993	0.968	1.04782e-54	2	Myl6
Pgk1	3.31593e-58	0.418147	0.815	0.642	6.95648e-54	2	Pgk1
Csf1	1.06883e-57	0.461064	0.509	0.306	2.24231e-53	2	Csf1
Tmem1711	2.67282e-56	0.407881	0.276	0.119	5.6073e-52	2	Tmem171
Sdf41	9.36949e-54	0.350577	0.912	0.799	1.96562e-49	2	Sdf4
Bcl2a1b	1.85702e-53	0.369634	0.609	0.428	3.89584e-49	2	Bcl2a1b
Ucp2	4.87876e-52	0.454961	0.916	0.863	1.02352e-47	2	Ucp2
Serpinb9	2.16894e-51	0.52713	0.601	0.437	4.55021e-47	2	Serpinb9
Ccl1	2.23579e-50	1.27172	0.234	0.097	4.69047e-46	2	Ccl1
Capg	2.6069e-50	0.371117	0.843	0.697	5.46902e-46	2	Capg
Mt3	8.16157e-50	0.342099	0.193	0.072	1.71222e-45	2	Mt3
Ehd1	9.8772e-50	0.353443	0.476	0.297	2.07214e-45	2	Ehd1
Ubl5	3.43526e-49	0.268575	0.934	0.871	7.20684e-45	2	Ubl5
Prdm1	2.85026e-48	0.360951	0.287	0.138	5.97957e-44	2	Prdm1
Ece11	4.68164e-48	0.370223	0.507	0.327	9.82162e-44	2	Ece1
Sat11	1.56275e-47	0.389817	0.732	0.565	3.27849e-43	2	Sat1
H2-T23	1.71192e-47	0.269187	0.92	0.857	3.59144e-43	2	H2-T23
Smox	1.29867e-45	0.326617	0.167	0.059	2.72449e-41	2	Smox
Plek	7.92479e-45	0.381627	0.593	0.429	1.66254e-40	2	Plek
Icos	1.01834e-44	0.38128	0.813	0.663	2.13638e-40	2	Icos
Gem	2.04244e-44	0.491431	0.556	0.392	4.28483e-40	2	Gem
Vsir	2.96325e-44	0.345297	0.541	0.362	6.21661e-40	2	Vsir
Samsn11	3.7262e-44	0.316293	0.692	0.529	7.81719e-40	2	Samsn1
Rbpj	5.12815e-44	0.366233	0.53	0.364	1.07584e-39	2	Rbpj
Bhlhe401	1.47797e-43	0.303039	0.852	0.707	3.10062e-39	2	Bhlhe40
Cd44	4.93762e-43	0.397489	0.641	0.489	1.03586e-38	2	Cd44
Id2	1.3969e-42	0.318018	0.867	0.75	2.93056e-38	2	Id2
Egr2	1.34962e-41	0.266318	0.124	0.038	2.83137e-37	2	Egr2
Smim3	2.14785e-41	0.316587	0.349	0.198	4.50598e-37	2	Smim3
Crabp2	2.16889e-41	0.651912	0.194	0.08	4.55012e-37	2	Crabp2
Slc17a61	8.47432e-41	0.473286	0.425	0.256	1.77783e-36	2	Slc17a6
Mt1	1.02638e-38	0.768648	0.264	0.132	2.15323e-34	2	Mt1
Gm2a	7.10862e-38	0.306795	0.443	0.281	1.49132e-33	2	Gm2a
Tgfb11	2.63792e-37	0.353825	0.732	0.601	5.53409e-33	2	Tgfb1
Dusp51	3.82463e-37	0.302345	0.489	0.324	8.02369e-33	2	Dusp5
Sh2d2a	7.33151e-37	0.279211	0.817	0.693	1.53808e-32	2	Sh2d2a
Ephx1	3.83624e-36	0.317364	0.129	0.045	8.04806e-32	2	Ephx1
Alcam1	5.13909e-36	0.314151	0.468	0.314	1.07813e-31	2	Alcam
Crlf2	7.6573e-36	0.307056	0.507	0.357	1.60643e-31	2	Crlf2
Map2k3	1.86944e-35	0.327509	0.485	0.339	3.92191e-31	2	Map2k3
Ftl1	2.04889e-35	0.29695	0.953	0.912	4.29836e-31	2	Ftl1
Spry11	2.66651e-35	0.340462	0.257	0.13	5.59407e-31	2	Spry1
Dap1	4.30409e-34	0.305848	0.715	0.566	9.02955e-30	2	Dap
Sdcbp21	4.79646e-34	0.290922	0.285	0.154	1.00625e-29	2	Sdcbp2
Mxi1	5.36264e-34	0.283392	0.257	0.134	1.12503e-29	2	Mxi1
Klrc2	1.24759e-33	0.284482	0.414	0.27	2.61731e-29	2	Klrc2
Bsg	4.26178e-33	0.30176	0.783	0.658	8.94079e-29	2	Bsg
Prelid1	5.08771e-33	0.272322	0.822	0.699	1.06735e-28	2	Prelid1
Gpr65	8.01928e-33	0.322132	0.395	0.254	1.68237e-28	2	Gpr65
Ctsb	1.26675e-32	0.275749	0.714	0.588	2.65752e-28	2	Ctsb
Il1r2	2.78459e-32	0.538014	0.212	0.103	5.8418e-28	2	Il1r2
Zap70	8.73205e-31	0.267451	0.711	0.591	1.8319e-26	2	Zap70
Bnip3	1.19938e-30	0.421869	0.255	0.142	2.51619e-26	2	Bnip3
Ttc39c	2.14699e-30	0.267824	0.356	0.22	4.50417e-26	2	Ttc39c
Ccdc50	7.94854e-30	0.282137	0.627	0.491	1.66752e-25	2	Ccdc50
Gpr68	8.21988e-30	0.282996	0.459	0.321	1.72445e-25	2	Gpr68
Litaf	1.05476e-29	0.278286	0.653	0.509	2.21279e-25	2	Litaf
Atxn1	1.42644e-29	0.292375	0.375	0.242	2.99253e-25	2	Atxn1
Stx11	1.88546e-29	0.257393	0.275	0.155	3.9555e-25	2	Stx11
Pold4	1.88896e-29	0.298321	0.514	0.381	3.96286e-25	2	Pold4
Nfil3	6.21466e-29	0.312238	0.406	0.271	1.30377e-24	2	Nfil3
Cblb	8.21041e-29	0.273312	0.609	0.478	1.72246e-24	2	Cblb
Ubash3b1	1.34978e-28	0.297464	0.391	0.265	2.8317e-24	2	Ubash3b
Nrgn1	1.85153e-28	0.688401	0.518	0.405	3.88433e-24	2	Nrgn
Cox17	2.55466e-28	0.269514	0.725	0.588	5.35943e-24	2	Cox17
Mlf2	2.94257e-28	0.257379	0.599	0.469	6.17321e-24	2	Mlf2
Slc16a3	3.84105e-28	0.28142	0.242	0.135	8.05815e-24	2	Slc16a3
Il18rap1	6.73399e-27	0.290702	0.556	0.427	1.41272e-22	2	Il18rap
Gm7336	1.04143e-26	0.266639	0.425	0.297	2.18481e-22	2	Gm7336
Ctsd	2.02319e-26	0.251697	0.837	0.723	4.24446e-22	2	Ctsd
Cd160	3.10519e-24	0.35371	0.449	0.326	6.51439e-20	2	Cd160
Il2ra	4.37571e-24	0.30733	0.403	0.28	9.1798e-20	2	Il2ra
Ube2a	5.64105e-24	0.256152	0.625	0.508	1.18344e-19	2	Ube2a
Slc2a1	6.27205e-24	0.255575	0.372	0.254	1.31581e-19	2	Slc2a1
Elk31	2.01709e-23	0.278565	0.395	0.281	4.23165e-19	2	Elk3
Pacsin1	3.84731e-23	0.277697	0.161	0.079	8.07128e-19	2	Pacsin1
Ap3b11	8.28121e-23	0.31666	0.533	0.423	1.73731e-18	2	Ap3b1
Ccng1	1.01807e-22	0.357744	0.579	0.488	2.13581e-18	2	Ccng1
Ndrg1	4.86971e-22	0.349883	0.282	0.183	1.02162e-17	2	Ndrg1
Slco4a11	8.50285e-22	0.252921	0.254	0.156	1.78381e-17	2	Slco4a1
Prdx5	1.41063e-19	0.251539	0.65	0.56	2.95936e-15	2	Prdx5
Pfkp	3.44455e-19	0.257694	0.524	0.422	7.22632e-15	2	Pfkp
Crtam	1.75289e-18	0.625025	0.279	0.19	3.67738e-14	2	Crtam
Gm19585	2.66849e-18	0.337364	0.507	0.415	5.59822e-14	2	Gm19585
Higd1a	3.04248e-18	0.296269	0.689	0.611	6.38281e-14	2	Higd1a
Mif	6.18773e-18	0.296643	0.827	0.753	1.29812e-13	2	Mif
Ero1l	2.45811e-17	0.307162	0.312	0.219	5.15688e-13	2	Ero1l
Ankrd37	5.96696e-17	0.2727	0.155	0.086	1.25181e-12	2	Ankrd37
Plac8	2.63929e-11	0.290094	0.475	0.394	5.53697e-07	2	Plac8
Cdkn2a	6.57891e-11	0.276773	0.116	0.069	1.38019e-06	2	Cdkn2a
Ly6a	1.186e-09	0.504466	0.421	0.352	2.48812e-05	2	Ly6a
Nrn11	4.01104e-07	0.277164	0.294	0.24	0.00841477	2	Nrn1
Lta	1.52379e-05	0.250821	0.215	0.17	0.319675	2	Lta
Serpinb9b1	0.000513515	0.380413	0.154	0.124	1	2	Serpinb9b
Gzmf	0	2.55641	0.615	0.107	0	3	Gzmf
Gzmc	0	2.25851	0.557	0.123	0	3	Gzmc
Fcer1g	0	1.75964	0.529	0.089	0	3	Fcer1g
Spp1	0	1.60275	0.895	0.31	0	3	Spp1
Klra5	0	1.40469	0.413	0.052	0	3	Klra5
Cd244	0	0.62344	0.487	0.086	0	3	Cd244
Lat2	4.87767e-281	0.722695	0.712	0.221	1.02329e-276	3	Lat2
Gzmb1	1.10339e-246	0.934407	0.932	0.47	2.3148e-242	3	Gzmb
S100a6	3.83704e-229	0.822783	0.988	0.813	8.04974e-225	3	S100a6
Ctsd1	5.37611e-227	0.699832	0.985	0.708	1.12785e-222	3	Ctsd
Lgals31	5.18577e-199	0.614861	0.988	0.706	1.08792e-194	3	Lgals3
Entpd11	1.30797e-192	0.578106	0.64	0.223	2.744e-188	3	Entpd1
Trgv2	1.17729e-190	0.78994	0.367	0.077	2.46984e-186	3	Trgv2
Fcrl6	4.7567e-179	0.57103	0.397	0.098	9.97907e-175	3	Fcrl6
Il2rb	4.23837e-176	0.621682	0.954	0.654	8.89168e-172	3	Il2rb
1810011H11Rik	5.79745e-171	0.277768	0.18	0.018	1.21625e-166	3	1810011H11Rik
C1qtnf6	2.28811e-164	0.508467	0.455	0.134	4.80022e-160	3	C1qtnf6
Fgl2	6.5221e-163	0.617619	0.749	0.33	1.36827e-158	3	Fgl2
Abcb9	5.85698e-162	0.492828	0.457	0.136	1.22873e-157	3	Abcb9
Ly6g5b	1.6319e-157	0.275764	0.197	0.025	3.42356e-153	3	Ly6g5b
Ifitm1	3.25942e-154	1.04594	0.732	0.393	6.83794e-150	3	Ifitm1
Emilin2	8.35206e-153	0.375268	0.33	0.077	1.75218e-148	3	Emilin2
Itga1	6.13595e-151	0.352313	0.325	0.074	1.28726e-146	3	Itga1
Litaf1	6.51653e-146	0.528547	0.872	0.486	1.3671e-141	3	Litaf
Vim	6.82115e-142	0.512228	0.996	0.83	1.43101e-137	3	Vim
Chn2	3.98376e-141	0.36035	0.345	0.087	8.35753e-137	3	Chn2
Dapk2	1.61545e-140	0.360757	0.336	0.083	3.38905e-136	3	Dapk2
Cdk6	2.77344e-134	0.504061	0.613	0.259	5.8184e-130	3	Cdk6
Qpct	7.64212e-130	0.304373	0.226	0.041	1.60324e-125	3	Qpct
Gpr34	9.82684e-130	0.289394	0.232	0.044	2.06157e-125	3	Gpr34
a	2.65455e-129	0.379241	0.301	0.073	5.56897e-125	3	a
Ifitm2	4.43104e-128	0.581822	0.72	0.346	9.29589e-124	3	Ifitm2
Sh3bgrl3	9.67477e-128	0.389038	0.995	0.923	2.02967e-123	3	Sh3bgrl3
S100a4	2.4334e-126	0.488111	0.812	0.423	5.10504e-122	3	S100a4
Ctla2a	3.46358e-125	0.495906	0.714	0.336	7.26624e-121	3	Ctla2a
Tmsb4x	1.53705e-123	0.287548	1	0.999	3.22457e-119	3	Tmsb4x
Isg20	2.15268e-118	0.346557	0.55	0.211	4.51611e-114	3	Isg20
AW112010	1.5868e-115	0.371777	1	0.964	3.32894e-111	3	AW112010
Gzmg	1.74618e-106	0.749384	0.111	0.011	3.66332e-102	3	Gzmg
Car2	1.65651e-103	0.284816	0.225	0.05	3.4752e-99	3	Car2
AA467197	6.37343e-101	0.354521	0.402	0.142	1.33708e-96	3	AA467197
Capg1	1.80176e-99	0.400064	0.961	0.686	3.77992e-95	3	Capg
Smyd3	1.9469e-99	0.356549	0.497	0.202	4.0844e-95	3	Smyd3
S100a11	5.46492e-96	0.414511	0.951	0.713	1.14648e-91	3	S100a11
Pglyrp11	5.62147e-92	0.427473	0.871	0.535	1.17933e-87	3	Pglyrp1
Cdkn2b	2.00595e-91	0.254693	0.18	0.037	4.20829e-87	3	Cdkn2b
Bcl2	1.00328e-90	0.358934	0.675	0.337	2.10478e-86	3	Bcl2
Ccr51	4.31963e-90	0.347235	0.587	0.269	9.06216e-86	3	Ccr5
Bnip31	1.6556e-88	0.384603	0.364	0.131	3.47329e-84	3	Bnip3
Myl61	1.35373e-87	0.279072	0.999	0.968	2.84e-83	3	Myl6
Nedd9	3.04877e-86	0.418313	0.746	0.427	6.39601e-82	3	Nedd9
Ppp1r3b	1.16686e-85	0.327336	0.375	0.14	2.44796e-81	3	Ppp1r3b
Havcr21	6.17555e-85	0.276433	0.712	0.35	1.29557e-80	3	Havcr2
Arsb	2.89674e-84	0.378608	0.629	0.317	6.07708e-80	3	Arsb
Cd52	2.07986e-83	0.335217	0.999	0.979	4.36334e-79	3	Cd52
Cd3g	1.11462e-82	0.278822	0.998	0.967	2.33836e-78	3	Cd3g
Myo10	5.16061e-81	0.328772	0.384	0.151	1.08265e-76	3	Myo10
Prf11	9.79188e-78	0.437323	0.76	0.439	2.05424e-73	3	Prf1
Ifitm3	3.88714e-77	0.426671	0.627	0.335	8.15484e-73	3	Ifitm3
Plac81	4.08064e-75	0.435276	0.677	0.372	8.56078e-71	3	Plac8
Napsa	4.94643e-74	0.274831	0.259	0.083	1.03771e-69	3	Napsa
Pdcd11	7.44247e-74	0.373648	0.954	0.714	1.56136e-69	3	Pdcd1
Id21	7.77987e-74	0.338141	0.967	0.74	1.63214e-69	3	Id2
Itgav1	8.83744e-74	0.33227	0.732	0.424	1.85401e-69	3	Itgav
Lgals1	1.08531e-72	0.302486	0.995	0.881	2.27687e-68	3	Lgals1
Glmn	1.40731e-72	0.253512	0.274	0.094	2.9524e-68	3	Glmn
Fndc3a	5.64117e-71	0.277872	0.494	0.232	1.18346e-66	3	Fndc3a
F2r	9.4489e-70	0.270358	0.434	0.193	1.98229e-65	3	F2r
S100a1	2.19917e-69	0.259603	0.25	0.082	4.61365e-65	3	S100a1
Ptpn6	7.10867e-69	0.402142	0.762	0.485	1.49133e-64	3	Ptpn6
Gadd45g	7.84574e-69	0.344393	0.321	0.123	1.64596e-64	3	Gadd45g
Ech1	2.49757e-68	0.33366	0.793	0.504	5.23965e-64	3	Ech1
1700017B05Rik	2.40011e-67	0.287762	0.362	0.15	5.03519e-63	3	1700017B05Rik
Cd38	7.68827e-67	0.259184	0.361	0.15	1.61292e-62	3	Cd38
Ntan1	1.86286e-66	0.311268	0.666	0.388	3.90809e-62	3	Ntan1
Gzmd1	3.22325e-66	0.921479	0.315	0.124	6.76205e-62	3	Gzmd
Klre11	1.27326e-65	0.288396	0.535	0.265	2.67118e-61	3	Klre1
Nek6	1.90749e-63	0.276637	0.353	0.149	4.00172e-59	3	Nek6
Irf81	6.22204e-63	0.367716	0.7	0.425	1.30532e-58	3	Irf8
Ndrg11	1.18851e-62	0.314508	0.387	0.173	2.49337e-58	3	Ndrg1
Aprt	1.6776e-62	0.339571	0.862	0.607	3.51945e-58	3	Aprt
Prdx51	2.54965e-62	0.315822	0.814	0.543	5.34891e-58	3	Prdx5
Nfil31	7.63767e-62	0.299345	0.516	0.261	1.60231e-57	3	Nfil3
Esyt1	7.78025e-62	0.319863	0.747	0.468	1.63222e-57	3	Esyt1
Tgfbr2	5.38208e-61	0.275206	0.706	0.414	1.12911e-56	3	Tgfbr2
Lgals3bp	2.07436e-60	0.298634	0.547	0.289	4.3518e-56	3	Lgals3bp
Ugcg	9.49236e-57	0.275197	0.654	0.371	1.9914e-52	3	Ugcg
Vasp	9.51876e-57	0.285982	0.882	0.638	1.99694e-52	3	Vasp
Glrx	3.7929e-56	0.286277	0.671	0.397	7.95712e-52	3	Glrx
Ptk2b	6.85441e-56	0.27285	0.598	0.339	1.43799e-51	3	Ptk2b
Tmem30a	1.95974e-52	0.281097	0.789	0.51	4.11133e-48	3	Tmem30a
Gstp3	2.3222e-50	0.267224	0.581	0.331	4.87175e-46	3	Gstp3
Ly6e	7.85886e-49	0.297755	0.875	0.629	1.64871e-44	3	Ly6e
Hilpda1	1.74582e-48	0.294605	0.552	0.308	3.66256e-44	3	Hilpda
Pgk11	4.00182e-46	0.306709	0.882	0.637	8.39543e-42	3	Pgk1
Mt11	8.28115e-46	0.448654	0.294	0.131	1.7373e-41	3	Mt1
Klra3	2.26929e-45	0.377548	0.115	0.029	4.76075e-41	3	Klra3
Bola2	3.1469e-45	0.258572	0.729	0.469	6.60188e-41	3	Bola2
Gzme1	1.98278e-42	0.62409	0.263	0.115	4.15967e-38	3	Gzme
Myh9	1.99076e-40	0.322542	0.943	0.803	4.17641e-36	3	Myh9
Gm1561	2.24336e-40	0.390812	0.183	0.068	4.70634e-36	3	Gm156
Eno11	4.83412e-35	0.261759	0.937	0.758	1.01415e-30	3	Eno1
Gzma1	1.59176e-11	1.16452	0.18	0.113	3.33936e-07	3	Gzma
Mcm3	0	1.01229	0.885	0.167	0	4	Mcm3
Mcm6	0	0.964032	0.852	0.166	0	4	Mcm6
Mcm4	0	0.893051	0.861	0.212	0	4	Mcm4
Mcm5	0	0.879274	0.801	0.134	0	4	Mcm5
Dut	0	0.855522	0.934	0.394	0	4	Dut
Mcm2	0	0.835935	0.773	0.134	0	4	Mcm2
Mcm7	0	0.787383	0.721	0.117	0	4	Mcm7
Lig1	0	0.779066	0.715	0.121	0	4	Lig1
Hells	0	0.711475	0.701	0.144	0	4	Hells
Tipin	0	0.680829	0.766	0.183	0	4	Tipin
Stmn1	0	0.625427	0.724	0.148	0	4	Stmn1
Cdca7	0	0.560835	0.535	0.062	0	4	Cdca7
Ung	0	0.4657	0.415	0.028	0	4	Ung
Gins2	0	0.463832	0.448	0.056	0	4	Gins2
Tk1	3.538e-307	0.499932	0.517	0.092	7.42238e-303	4	Tk1
Prim1	4.59329e-304	0.490229	0.522	0.096	9.63627e-300	4	Prim1
Dhfr	4.53524e-293	0.372897	0.393	0.054	9.51449e-289	4	Dhfr
Gmnn	8.15588e-276	0.528698	0.656	0.162	1.71102e-271	4	Gmnn
Ptma	1.16245e-273	0.597829	1	0.973	2.4387e-269	4	Ptma
Orc6	6.88868e-265	0.461409	0.544	0.118	1.44518e-260	4	Orc6
Chaf1a	2.22243e-259	0.348145	0.37	0.055	4.66243e-255	4	Chaf1a
Dtl	3.57938e-256	0.351966	0.371	0.056	7.50918e-252	4	Dtl
Ppia	4.20074e-242	0.413439	1	0.994	8.81273e-238	4	Ppia
Timeless	4.46949e-241	0.329593	0.33	0.046	9.37655e-237	4	Timeless
Fen1	5.23542e-239	0.473601	0.545	0.13	1.09834e-234	4	Fen1
Dnmt1	5.55973e-239	0.587237	0.738	0.24	1.16637e-234	4	Dnmt1
Rmi2	3.78825e-230	0.337765	0.343	0.053	7.94737e-226	4	Rmi2
Siva1	1.49999e-228	0.509876	0.689	0.211	3.14682e-224	4	Siva1
Nasp	1.83378e-228	0.500099	0.645	0.187	3.84708e-224	4	Nasp
Tfdp1	1.75793e-226	0.404305	0.531	0.128	3.68795e-222	4	Tfdp1
Ranbp1	2.40447e-225	0.662901	0.946	0.505	5.04435e-221	4	Ranbp1
Tyms	1.05084e-223	0.446441	0.526	0.124	2.20457e-219	4	Tyms
Rrm1	1.33031e-223	0.469985	0.63	0.172	2.79087e-219	4	Rrm1
Rfc3	1.99797e-223	0.365766	0.438	0.09	4.19155e-219	4	Rfc3
Cdc6	2.30783e-220	0.270421	0.259	0.03	4.84159e-216	4	Cdc6
Uhrf1	5.14098e-217	0.372696	0.425	0.087	1.07853e-212	4	Uhrf1
Pcna	8.33357e-217	0.472474	0.664	0.196	1.7483e-212	4	Pcna
Rfc4	1.26233e-210	0.387609	0.439	0.095	2.64823e-206	4	Rfc4
Chaf1b	1.02156e-208	0.28726	0.336	0.055	2.14313e-204	4	Chaf1b
Pold1	1.02038e-206	0.3247	0.393	0.078	2.14066e-202	4	Pold1
Cbx5	2.42736e-196	0.366949	0.573	0.158	5.09237e-192	4	Cbx5
Clspn	9.31075e-196	0.349712	0.368	0.071	1.9533e-191	4	Clspn
Rfc5	1.7729e-195	0.354705	0.475	0.115	3.71937e-191	4	Rfc5
Atad5	1.47585e-193	0.309734	0.385	0.078	3.09619e-189	4	Atad5
Rfc2	5.54724e-193	0.493638	0.79	0.297	1.16376e-188	4	Rfc2
Tuba1b	9.31223e-193	0.42856	0.873	0.377	1.95361e-188	4	Tuba1b
Pola1	2.91875e-190	0.326692	0.409	0.089	6.12325e-186	4	Pola1
Tcf19	5.36302e-190	0.320191	0.365	0.071	1.12511e-185	4	Tcf19
E2f1	6.67314e-189	0.253097	0.235	0.029	1.39996e-184	4	E2f1
Srm	2.16144e-186	0.37417	0.486	0.124	4.53448e-182	4	Srm
Dctpp1	4.79266e-186	0.455272	0.62	0.198	1.00545e-181	4	Dctpp1
Apitd1	3.99656e-184	0.26734	0.316	0.056	8.38439e-180	4	Apitd1
Ran	1.53555e-181	0.58268	0.987	0.693	3.22142e-177	4	Ran
Syce2	6.80445e-180	0.284529	0.335	0.064	1.42751e-175	4	Syce2
Cisd1	1.32785e-179	0.431416	0.642	0.216	2.78571e-175	4	Cisd1
Cdk4	6.14685e-175	0.484418	0.819	0.339	1.28955e-170	4	Cdk4
Apex1	2.17578e-168	0.310849	0.447	0.113	4.56457e-164	4	Apex1
Topbp1	9.14532e-168	0.345514	0.489	0.136	1.9186e-163	4	Topbp1
Eno3	5.67374e-163	0.436375	0.342	0.075	1.19029e-158	4	Eno3
Nrm	2.98141e-160	0.256519	0.423	0.106	6.25471e-156	4	Nrm
Pa2g4	5.35837e-160	0.53227	0.871	0.436	1.12413e-155	4	Pa2g4
Mthfd1	7.4452e-158	0.286457	0.379	0.09	1.56193e-153	4	Mthfd1
Impdh2	1.21021e-157	0.418438	0.678	0.253	2.53889e-153	4	Impdh2
Ldha	1.37789e-153	0.474405	0.998	0.869	2.89067e-149	4	Ldha
Asf1b	3.41808e-153	0.299973	0.391	0.095	7.17079e-149	4	Asf1b
Gm6166	3.57761e-153	0.308779	0.424	0.113	7.50546e-149	4	Gm6166
Nhp2	1.25082e-152	0.44912	0.751	0.314	2.62409e-148	4	Nhp2
Rpa2	3.59961e-152	0.396226	0.699	0.261	7.55161e-148	4	Rpa2
Smc2	7.97864e-152	0.307553	0.546	0.163	1.67384e-147	4	Smc2
Snrpd1	4.54805e-151	0.47758	0.874	0.429	9.54135e-147	4	Snrpd1
Rpa1	5.26501e-149	0.346564	0.617	0.214	1.10455e-144	4	Rpa1
Nap1l1	2.28022e-148	0.497331	0.892	0.467	4.78367e-144	4	Nap1l1
Hnrnpab	2.36675e-148	0.53088	0.911	0.503	4.96521e-144	4	Hnrnpab
Pclaf	2.66704e-148	0.355906	0.441	0.117	5.59518e-144	4	Pclaf
C1qbp	1.88451e-147	0.451138	0.785	0.344	3.95351e-143	4	C1qbp
Phgdh	3.00044e-147	0.384025	0.564	0.19	6.29463e-143	4	Phgdh
Nop56	3.11915e-147	0.347011	0.604	0.21	6.54366e-143	4	Nop56
Nutf2	4.35374e-147	0.421085	0.76	0.317	9.1337e-143	4	Nutf2
Dtymk	5.65315e-147	0.373314	0.627	0.224	1.18597e-142	4	Dtymk
Ybx1	3.07485e-146	0.439969	0.995	0.839	6.45072e-142	4	Ybx1
Rad51	6.86028e-146	0.262393	0.3	0.062	1.43922e-141	4	Rad51
Slbp	1.16612e-144	0.430934	0.8	0.344	2.44641e-140	4	Slbp
Hat1	2.77436e-143	0.351376	0.585	0.2	5.82033e-139	4	Hat1
Nop58	3.04755e-143	0.41018	0.72	0.292	6.39346e-139	4	Nop58
Rnaseh2b	4.74192e-143	0.253332	0.412	0.111	9.94808e-139	4	Rnaseh2b
Sdf2l1	5.10725e-143	0.402263	0.701	0.277	1.07145e-138	4	Sdf2l1
Cdca7l	9.00778e-141	0.254192	0.349	0.083	1.88974e-136	4	Cdca7l
Rpa3	4.65167e-138	0.340976	0.648	0.24	9.75874e-134	4	Rpa3
Ipo5	1.43937e-137	0.354073	0.602	0.215	3.01965e-133	4	Ipo5
Dnajc9	4.58951e-135	0.463928	0.864	0.426	9.62834e-131	4	Dnajc9
Atad2	1.20602e-133	0.327263	0.591	0.207	2.53011e-129	4	Atad2
Gar1	2.124e-133	0.302374	0.516	0.17	4.45594e-129	4	Gar1
Hspbp1	3.82647e-133	0.325126	0.6	0.215	8.02755e-129	4	Hspbp1
Alyref	3.10284e-132	0.362688	0.704	0.28	6.50945e-128	4	Alyref
Galk1	3.13322e-132	0.308228	0.492	0.159	6.57318e-128	4	Galk1
Ppat	7.34052e-132	0.265308	0.448	0.135	1.53997e-127	4	Ppat
Nolc1	1.25348e-129	0.312966	0.519	0.175	2.62968e-125	4	Nolc1
H2afz	6.55234e-129	0.422337	0.987	0.732	1.37462e-124	4	H2afz
Shmt2	3.38602e-127	0.254112	0.426	0.127	7.10352e-123	4	Shmt2
Psat1	5.42412e-126	0.300992	0.472	0.153	1.13793e-121	4	Psat1
Slc25a5	9.56276e-125	0.43782	0.97	0.681	2.00617e-120	4	Slc25a5
Paics	6.777e-124	0.381015	0.812	0.378	1.42175e-119	4	Paics
Hspa9	2.04306e-123	0.329965	0.646	0.256	4.28614e-119	4	Hspa9
Eif5a	8.45669e-123	0.413307	0.991	0.838	1.77413e-118	4	Eif5a
Lmnb1	5.52829e-122	0.285328	0.65	0.246	1.15978e-117	4	Lmnb1
Tfrc	9.84423e-122	0.321458	0.479	0.16	2.06522e-117	4	Tfrc
Sfxn1	4.10861e-121	0.25463	0.458	0.148	8.61945e-117	4	Sfxn1
Atic	1.94455e-120	0.287872	0.542	0.194	4.07946e-116	4	Atic
Hint1	2.69617e-120	0.396815	0.986	0.76	5.65629e-116	4	Hint1
Nudt5	5.14432e-120	0.278235	0.588	0.217	1.07923e-115	4	Nudt5
Rfc1	8.24735e-119	0.270087	0.554	0.197	1.73021e-114	4	Rfc1
Npm1	2.30499e-118	0.409844	0.992	0.871	4.83563e-114	4	Npm1
Fbl	6.35352e-118	0.360491	0.759	0.343	1.3329e-113	4	Fbl
Eif3b	3.10617e-117	0.340747	0.701	0.298	6.51644e-113	4	Eif3b
Rps2	1.51673e-116	0.357649	0.997	0.939	3.18194e-112	4	Rps2
Dkc1	2.21557e-115	0.256918	0.423	0.133	4.64804e-111	4	Dkc1
Tkt	3.2038e-115	0.404149	0.853	0.454	6.72124e-111	4	Tkt
Rbbp7	4.99985e-114	0.380046	0.87	0.449	1.04892e-109	4	Rbbp7
Hnrnpa3	8.45649e-114	0.387122	0.991	0.836	1.77409e-109	4	Hnrnpa3
Nsun2	9.05101e-114	0.284813	0.567	0.212	1.89881e-109	4	Nsun2
Hmgn2	1.02196e-112	0.281067	0.734	0.308	2.14396e-108	4	Hmgn2
Set	1.15541e-110	0.411396	0.947	0.625	2.42393e-106	4	Set
Cenpw	8.84966e-110	0.276733	0.531	0.192	1.85657e-105	4	Cenpw
Usp1	9.62897e-110	0.294001	0.633	0.256	2.02006e-105	4	Usp1
Mybbp1a	8.90504e-109	0.30506	0.609	0.246	1.86819e-104	4	Mybbp1a
Parp1	4.04961e-108	0.256091	0.496	0.177	8.49567e-104	4	Parp1
Prmt1	6.82497e-108	0.344098	0.741	0.342	1.43181e-103	4	Prmt1
Hspd1	1.76765e-105	0.385366	0.853	0.475	3.70836e-101	4	Hspd1
Atp5g3	2.0317e-105	0.336645	0.997	0.862	4.26231e-101	4	Atp5g3
Banf1	4.41718e-105	0.384558	0.876	0.477	9.26681e-101	4	Banf1
Rpn1	1.41916e-104	0.371104	0.721	0.348	2.97725e-100	4	Rpn1
Smc1a	2.82645e-104	0.344388	0.8	0.378	5.92962e-100	4	Smc1a
Anapc5	4.51386e-104	0.308005	0.658	0.282	9.46963e-100	4	Anapc5
Ppa1	6.29503e-104	0.280129	0.619	0.256	1.32063e-99	4	Ppa1
Lsm2	6.01531e-103	0.277909	0.615	0.251	1.26195e-98	4	Lsm2
Spp11	7.96209e-103	0.523092	0.69	0.335	1.67037e-98	4	Spp1
Cct3	3.27391e-102	0.325884	0.682	0.303	6.86834e-98	4	Cct3
Txn1	4.36969e-101	0.391421	0.972	0.685	9.16718e-97	4	Txn1
Prelid3b	9.68719e-101	0.272512	0.576	0.231	2.03228e-96	4	Prelid3b
Prdx1	1.73026e-98	0.383281	0.987	0.768	3.62991e-94	4	Prdx1
Alad	1.8296e-98	0.253506	0.512	0.195	3.83832e-94	4	Alad
Cct6a	1.33815e-97	0.319179	0.727	0.344	2.8073e-93	4	Cct6a
Rbm3	3.97224e-97	0.316609	1	0.916	8.33337e-93	4	Rbm3
Ndufab1	4.29793e-97	0.281221	0.704	0.312	9.01663e-93	4	Ndufab1
Dek	1.43717e-95	0.317173	0.867	0.456	3.01504e-91	4	Dek
Hpf1	1.45414e-95	0.288418	0.665	0.295	3.05064e-91	4	Hpf1
Cox5a	1.74219e-95	0.33671	0.992	0.797	3.65495e-91	4	Cox5a
Dpy30	3.07905e-95	0.290444	0.696	0.312	6.45953e-91	4	Dpy30
Ncl	4.44202e-95	0.405266	0.943	0.681	9.31892e-91	4	Ncl
Rrm2	4.45247e-95	0.250903	0.32	0.092	9.34083e-91	4	Rrm2
Ssrp1	1.77092e-94	0.318432	0.795	0.39	3.71521e-90	4	Ssrp1
Lgals11	6.17706e-94	0.375515	0.999	0.881	1.29589e-89	4	Lgals1
Pkm1	1.49072e-93	0.358767	0.99	0.818	3.12737e-89	4	Pkm
Eif4a1	6.47272e-93	0.379384	0.947	0.66	1.35791e-88	4	Eif4a1
Arsb1	4.09328e-92	0.329303	0.679	0.313	8.58728e-88	4	Arsb
Eif2s1	4.31582e-92	0.33126	0.818	0.434	9.05415e-88	4	Eif2s1
Hnrnpa1	1.36778e-91	0.371775	0.924	0.56	2.86946e-87	4	Hnrnpa1
Rps17	1.55477e-91	0.35554	0.98	0.795	3.26175e-87	4	Rps17
Rsl1d1	6.21769e-91	0.315667	0.758	0.377	1.30441e-86	4	Rsl1d1
Rexo2	5.2732e-90	0.278945	0.767	0.373	1.10626e-85	4	Rexo2
Srsf2	9.68014e-89	0.334376	0.864	0.48	2.0308e-84	4	Srsf2
Mif1	1.41652e-88	0.371987	0.966	0.739	2.97171e-84	4	Mif
Mrpl12	4.18968e-88	0.274447	0.67	0.305	8.78954e-84	4	Mrpl12
Pole4	3.78185e-87	0.303191	0.833	0.436	7.93395e-83	4	Pole4
Oxct1	8.61873e-87	0.276006	0.654	0.295	1.80812e-82	4	Oxct1
Nans	2.70454e-86	0.262712	0.675	0.307	5.67386e-82	4	Nans
Eif1ax	2.74337e-85	0.271976	0.719	0.345	5.75532e-81	4	Eif1ax
Lsm7	1.29292e-84	0.278072	0.702	0.338	2.71242e-80	4	Lsm7
Phb2	3.00222e-84	0.323548	0.808	0.444	6.29835e-80	4	Phb2
Mrpl18	4.44484e-83	0.271727	0.745	0.362	9.32483e-79	4	Mrpl18
Gspt1	7.70376e-83	0.254357	0.677	0.315	1.61617e-78	4	Gspt1
Spcs3	1.28242e-82	0.271532	0.707	0.34	2.69039e-78	4	Spcs3
Gars	9.02556e-82	0.25598	0.667	0.314	1.89347e-77	4	Gars
Polr2l	6.52373e-81	0.290106	0.8	0.417	1.36861e-76	4	Polr2l
Anp32b	8.75504e-81	0.33857	0.93	0.628	1.83672e-76	4	Anp32b
Tcp1	4.97819e-80	0.332133	0.849	0.491	1.04438e-75	4	Tcp1
Rps6	6.04961e-80	0.297294	0.993	0.9	1.26915e-75	4	Rps6
Lsm8	1.53452e-79	0.256808	0.757	0.376	3.21927e-75	4	Lsm8
Snrpe	7.55304e-79	0.31643	0.976	0.713	1.58455e-74	4	Snrpe
Bcap29	7.58725e-79	0.252098	0.629	0.292	1.59173e-74	4	Bcap29
G3bp1	6.411e-78	0.286137	0.761	0.393	1.34496e-73	4	G3bp1
Prf12	8.72743e-78	0.434412	0.768	0.439	1.83093e-73	4	Prf1
Cycs	9.4696e-78	0.331327	0.924	0.601	1.98663e-73	4	Cycs
Snu13	4.99633e-77	0.284539	0.711	0.361	1.04818e-72	4	Snu13
Rps27l	3.00089e-76	0.305851	0.829	0.459	6.29557e-72	4	Rps27l
Mrpl42	1.32857e-75	0.252251	0.721	0.354	2.78721e-71	4	Mrpl42
Nrgn2	7.98766e-75	0.263054	0.737	0.382	1.67573e-70	4	Nrgn
1810037I17Rik	5.27665e-74	0.32279	0.948	0.657	1.10699e-69	4	1810037I17Rik
U2af1	2.0504e-73	0.272343	0.745	0.388	4.30154e-69	4	U2af1
Atp5b	7.42936e-73	0.305548	0.978	0.777	1.55861e-68	4	Atp5b
Srsf7	1.15112e-72	0.296526	0.875	0.531	2.41493e-68	4	Srsf7
Snrpf	1.38492e-72	0.318874	0.841	0.503	2.90542e-68	4	Snrpf
Nme2	3.7503e-72	0.300315	0.898	0.552	7.86776e-68	4	Nme2
Snrpb	2.39779e-70	0.29588	0.919	0.591	5.03033e-66	4	Snrpb
Cox6a1	3.8843e-70	0.299186	0.948	0.672	8.14887e-66	4	Cox6a1
Pgk12	8.29103e-70	0.313443	0.945	0.631	1.73938e-65	4	Pgk1
Hprt	1.07085e-69	0.286376	0.869	0.503	2.24655e-65	4	Hprt
Cct8	2.85336e-69	0.280729	0.83	0.48	5.98607e-65	4	Cct8
Rbbp4	5.25179e-69	0.285238	0.881	0.524	1.10177e-64	4	Rbbp4
Tpi11	1.29366e-68	0.265297	0.945	0.6	2.71397e-64	4	Tpi1
Pdia6	1.84874e-68	0.318626	0.833	0.505	3.87847e-64	4	Pdia6
Cct5	2.65413e-68	0.294253	0.81	0.472	5.56811e-64	4	Cct5
Atpif1	2.30893e-67	0.274687	0.83	0.467	4.8439e-63	4	Atpif1
Hnrnpu	1.22913e-66	0.312016	0.961	0.716	2.57858e-62	4	Hnrnpu
Vdac1	1.34608e-65	0.254827	0.772	0.416	2.82395e-61	4	Vdac1
Serbp1	3.33539e-64	0.255387	0.992	0.829	6.99731e-60	4	Serbp1
Eno12	3.48181e-64	0.301865	0.971	0.754	7.30449e-60	4	Eno1
Bola21	5.62032e-63	0.251238	0.815	0.461	1.17909e-58	4	Bola2
Mt12	2.22645e-61	0.309089	0.324	0.129	4.67086e-57	4	Mt1
Ndufc2	5.68849e-61	0.250164	0.805	0.455	1.19339e-56	4	Ndufc2
Mdh2	8.40299e-61	0.268555	0.94	0.636	1.76286e-56	4	Mdh2
Cct7	8.85248e-61	0.267921	0.857	0.527	1.85716e-56	4	Cct7
Eef1g	2.41695e-60	0.273781	0.877	0.547	5.07052e-56	4	Eef1g
Pcbp1	8.15692e-60	0.267869	0.931	0.622	1.71124e-55	4	Pcbp1
Atp5g1	9.21732e-59	0.258623	0.92	0.613	1.9337e-54	4	Atp5g1
Cox171	4.92489e-58	0.286029	0.898	0.571	1.03319e-53	4	Cox17
Eif3a	2.79634e-57	0.253628	0.881	0.548	5.86645e-53	4	Eif3a
Rps2-ps10	7.14852e-56	0.261463	0.882	0.574	1.49969e-51	4	Rps2-ps10
Ywhah	2.87562e-55	0.257573	0.942	0.622	6.03276e-51	4	Ywhah
Calr	4.08136e-53	0.257371	0.858	0.555	8.56228e-49	4	Calr
Cct2	7.3506e-53	0.269139	0.862	0.568	1.54208e-48	4	Cct2
Gzmb2	1.71535e-50	0.578757	0.706	0.497	3.59863e-46	4	Gzmb
Gzmf1	6.01127e-35	0.404955	0.295	0.145	1.2611e-30	4	Gzmf
Gzmd2	1.16935e-10	0.263341	0.211	0.137	2.45318e-06	4	Gzmd
Pclaf1	0	2.22488	0.978	0.088	0	5	Pclaf
Top2a	0	2.14021	0.988	0.147	0	5	Top2a
Hist1h2ae	0	2.12955	0.915	0.084	0	5	Hist1h2ae
Tuba1b1	0	2.08862	0.992	0.384	0	5	Tuba1b
Tubb5	0	2.05141	0.995	0.705	0	5	Tubb5
Hist1h1b	0	2.04171	0.91	0.054	0	5	Hist1h1b
Mki67	0	2.0202	0.982	0.113	0	5	Mki67
Stmn11	0	2.00945	0.984	0.148	0	5	Stmn1
Rrm21	0	1.8935	0.933	0.054	0	5	Rrm2
Ube2c	0	1.85187	0.819	0.043	0	5	Ube2c
Hmgb2	0	1.73112	0.999	0.519	0	5	Hmgb2
Birc5	0	1.72735	0.962	0.049	0	5	Birc5
Ccna2	0	1.5343	0.93	0.029	0	5	Ccna2
Nusap1	0	1.50055	0.906	0.029	0	5	Nusap1
Tubb4b	0	1.49402	0.955	0.24	0	5	Tubb4b
H2afx	0	1.46885	0.926	0.163	0	5	H2afx
Hist1h1e	0	1.44063	0.92	0.303	0	5	Hist1h1e
Cenpf	0	1.43193	0.746	0.021	0	5	Cenpf
Hist1h1d	0	1.41533	0.817	0.09	0	5	Hist1h1d
Smc21	0	1.39894	0.967	0.145	0	5	Smc2
H2afz1	0	1.34785	0.995	0.74	0	5	H2afz
Cdca8	0	1.33221	0.899	0.052	0	5	Cdca8
Tpx2	0	1.32309	0.885	0.049	0	5	Tpx2
Hmgn21	0	1.31077	0.977	0.304	0	5	Hmgn2
Prc1	0	1.27534	0.84	0.041	0	5	Prc1
Cks1b	0	1.26769	0.909	0.088	0	5	Cks1b
Hist1h2ap	0	1.26555	0.806	0.03	0	5	Hist1h2ap
Tuba1c	0	1.20708	0.9	0.237	0	5	Tuba1c
Kif11	0	1.20389	0.865	0.031	0	5	Kif11
Knl1	0	1.19906	0.829	0.032	0	5	Knl1
Spc24	0	1.1894	0.885	0.044	0	5	Spc24
Asf1b1	0	1.15812	0.859	0.07	0	5	Asf1b
Cdk1	0	1.15544	0.831	0.052	0	5	Cdk1
Lmnb11	0	1.11591	0.929	0.239	0	5	Lmnb1
Tk11	0	1.10302	0.846	0.082	0	5	Tk1
Tacc3	0	1.09819	0.849	0.054	0	5	Tacc3
Tmpo	0	1.08939	0.945	0.229	0	5	Tmpo
Pttg1	0	1.08865	0.829	0.151	0	5	Pttg1
Incenp	0	1.08292	0.887	0.124	0	5	Incenp
Tyms1	0	1.06227	0.843	0.114	0	5	Tyms
Ccnb2	0	1.05716	0.748	0.041	0	5	Ccnb2
Ube2s	0	1.05458	0.967	0.378	0	5	Ube2s
Ptma1	0	1.02213	1	0.974	0	5	Ptma
Rrm11	0	1.01574	0.889	0.168	0	5	Rrm1
Esco2	0	0.991908	0.727	0.011	0	5	Esco2
Cenpe	0	0.982113	0.718	0.031	0	5	Cenpe
Smc4	0	0.960391	0.956	0.34	0	5	Smc4
Aurkb	0	0.959854	0.795	0.026	0	5	Aurkb
Cep55	0	0.952637	0.778	0.052	0	5	Cep55
Hist1h2ak	0	0.945386	0.57	0.019	0	5	Hist1h2ak
Clspn1	0	0.939181	0.754	0.052	0	5	Clspn
Ckap2l	0	0.92698	0.745	0.021	0	5	Ckap2l
Hmmr	0	0.916115	0.698	0.019	0	5	Hmmr
Fbxo5	0	0.910761	0.72	0.016	0	5	Fbxo5
Cdca3	0	0.908421	0.759	0.024	0	5	Cdca3
Spc25	0	0.89664	0.731	0.024	0	5	Spc25
Cenpw1	0	0.891995	0.887	0.177	0	5	Cenpw
Racgap1	0	0.890587	0.802	0.095	0	5	Racgap1
Diaph3	0	0.889326	0.749	0.047	0	5	Diaph3
Cks2	0	0.862001	0.795	0.133	0	5	Cks2
Ncapg	0	0.859882	0.73	0.034	0	5	Ncapg
Lig11	0	0.858452	0.76	0.138	0	5	Lig1
Selenoh	0	0.826777	0.918	0.268	0	5	Selenoh
Mad2l1	0	0.823771	0.78	0.08	0	5	Mad2l1
Gm4316	0	0.818939	0.733	0.102	0	5	Gm4316
Gmnn1	0	0.816262	0.828	0.166	0	5	Gmnn
Plk1	0	0.814744	0.643	0.01	0	5	Plk1
Kpna2	0	0.804088	0.622	0.074	0	5	Kpna2
Cdc20	0	0.803533	0.581	0.036	0	5	Cdc20
Kif23	0	0.798926	0.608	0.018	0	5	Kif23
Hist1h4d	0	0.79035	0.703	0.095	0	5	Hist1h4d
Pbk	0	0.78218	0.667	0.011	0	5	Pbk
Gm20628	0	0.778347	0.412	0.012	0	5	Gm20628
Neil3	0	0.759791	0.618	0.013	0	5	Neil3
Aspm	0	0.756298	0.535	0.014	0	5	Aspm
Ncapd2	0	0.753371	0.678	0.044	0	5	Ncapd2
Ncaph	0	0.751491	0.683	0.041	0	5	Ncaph
Kif22	0	0.743607	0.637	0.023	0	5	Kif22
Tcf191	0	0.741524	0.64	0.06	0	5	Tcf19
Mcm71	0	0.739134	0.746	0.135	0	5	Mcm7
Rad511	0	0.734578	0.667	0.043	0	5	Rad51
Shcbp1	0	0.717184	0.653	0.014	0	5	Shcbp1
Rad51ap1	0	0.714673	0.638	0.027	0	5	Rad51ap1
Nrm1	0	0.71063	0.694	0.096	0	5	Nrm
Kif4	0	0.699134	0.604	0.013	0	5	Kif4
Ncapd3	0	0.697421	0.737	0.112	0	5	Ncapd3
Ccdc34	0	0.697125	0.734	0.086	0	5	Ccdc34
Lockd	0	0.690468	0.655	0.073	0	5	Lockd
Bub1	0	0.688868	0.625	0.017	0	5	Bub1
Nuf2	0	0.682457	0.592	0.012	0	5	Nuf2
Kif20b	0	0.678422	0.602	0.042	0	5	Kif20b
Uhrf11	0	0.676877	0.662	0.08	0	5	Uhrf1
Mis18bp1	0	0.662809	0.566	0.02	0	5	Mis18bp1
Hist1h3e	0	0.655526	0.576	0.068	0	5	Hist1h3e
Mcm51	0	0.65066	0.768	0.159	0	5	Mcm5
Sgo2a	0	0.648623	0.573	0.014	0	5	Sgo2a
Fen11	0	0.647997	0.731	0.13	0	5	Fen1
Kif20a	0	0.643909	0.569	0.018	0	5	Kif20a
Plk4	0	0.638588	0.634	0.069	0	5	Plk4
Mxd3	0	0.625757	0.536	0.006	0	5	Mxd3
Bub1b	0	0.622629	0.531	0.016	0	5	Bub1b
Ska1	0	0.599589	0.566	0.016	0	5	Ska1
Hmgb3	0	0.596892	0.698	0.121	0	5	Hmgb3
Cdca2	0	0.594762	0.532	0.026	0	5	Cdca2
Ndc80	0	0.59302	0.573	0.019	0	5	Ndc80
Cmc2	0	0.592198	0.709	0.127	0	5	Cmc2
Dlgap5	0	0.590999	0.57	0.042	0	5	Dlgap5
Hjurp	0	0.576128	0.622	0.072	0	5	Hjurp
Ccnb1	0	0.569168	0.461	0.019	0	5	Ccnb1
Ncapg2	0	0.566129	0.563	0.04	0	5	Ncapg2
Prim11	0	0.564347	0.636	0.102	0	5	Prim1
Pola11	0	0.561188	0.6	0.085	0	5	Pola1
Dck	0	0.551638	0.569	0.081	0	5	Dck
Hist1h1a	0	0.548604	0.432	0.017	0	5	Hist1h1a
Rfc51	0	0.5416	0.664	0.113	0	5	Rfc5
Melk	0	0.539624	0.492	0.016	0	5	Melk
Atad51	0	0.538007	0.565	0.075	0	5	Atad5
Cenpm	0	0.537045	0.546	0.03	0	5	Cenpm
Knstrn	0	0.535944	0.521	0.048	0	5	Knstrn
Cdca5	0	0.535716	0.524	0.013	0	5	Cdca5
Ube2t	0	0.52098	0.561	0.049	0	5	Ube2t
Rfc41	0	0.516904	0.614	0.094	0	5	Rfc4
Pmf1	0	0.502903	0.604	0.08	0	5	Pmf1
Brip1	0	0.500754	0.462	0.023	0	5	Brip1
Hirip3	0	0.488109	0.542	0.072	0	5	Hirip3
Ckap2	0	0.487629	0.43	0.021	0	5	Ckap2
Cenpp	0	0.475662	0.464	0.017	0	5	Cenpp
Cdkn3	0	0.473958	0.412	0.022	0	5	Cdkn3
Anln	0	0.472197	0.445	0.009	0	5	Anln
Ect2	0	0.470967	0.449	0.019	0	5	Ect2
Arhgap11a	0	0.4695	0.457	0.023	0	5	Arhgap11a
Hist2h2ac	0	0.468488	0.437	0.029	0	5	Hist2h2ac
Sgo1	0	0.468252	0.458	0.009	0	5	Sgo1
Tubg1	0	0.466805	0.554	0.08	0	5	Tubg1
Pimreg	0	0.464298	0.375	0.008	0	5	Pimreg
Cit	0	0.46327	0.424	0.016	0	5	Cit
Cdc45	0	0.457053	0.483	0.033	0	5	Cdc45
Aurka	0	0.456002	0.435	0.011	0	5	Aurka
Cenph	0	0.444229	0.461	0.029	0	5	Cenph
Mastl	0	0.435585	0.415	0.009	0	5	Mastl
Stil	0	0.433586	0.416	0.012	0	5	Stil
Kif18a	0	0.427007	0.422	0.02	0	5	Kif18a
Pole	0	0.425548	0.431	0.041	0	5	Pole
Sapcd2	0	0.421801	0.383	0.009	0	5	Sapcd2
Cdc61	0	0.419697	0.352	0.03	0	5	Cdc6
Ttk	0	0.416717	0.402	0.007	0	5	Ttk
Ska2	0	0.416072	0.467	0.04	0	5	Ska2
Pkmyt1	0	0.415129	0.48	0.049	0	5	Pkmyt1
Chaf1a1	0	0.412659	0.48	0.058	0	5	Chaf1a
Kifc1	0	0.410812	0.423	0.014	0	5	Kifc1
Nek2	0	0.410733	0.36	0.01	0	5	Nek2
C330027C09Rik	0	0.405285	0.396	0.02	0	5	C330027C09Rik
Kif2c	0	0.398251	0.379	0.006	0	5	Kif2c
Suv39h1	0	0.395527	0.476	0.057	0	5	Suv39h1
Brca1	0	0.395235	0.379	0.022	0	5	Brca1
Cenpl	0	0.384771	0.499	0.056	0	5	Cenpl
Kntc1	0	0.378907	0.367	0.015	0	5	Kntc1
Kif18b	0	0.376867	0.348	0.005	0	5	Kif18b
Blm	0	0.366691	0.431	0.043	0	5	Blm
Fignl1	0	0.365832	0.393	0.031	0	5	Fignl1
Ccnf	0	0.362895	0.352	0.007	0	5	Ccnf
Depdc1b	0	0.358313	0.318	0.003	0	5	Depdc1b
Hist2h2bb	0	0.349623	0.31	0.018	0	5	Hist2h2bb
E2f7	0	0.349103	0.318	0.009	0	5	E2f7
Bard1	0	0.348597	0.412	0.031	0	5	Bard1
Hist1h2bm	0	0.348027	0.341	0.01	0	5	Hist1h2bm
Hist1h2ab	0	0.345735	0.341	0.003	0	5	Hist1h2ab
Trip13	0	0.339288	0.357	0.02	0	5	Trip13
E2f8	0	0.338947	0.344	0.006	0	5	E2f8
Spdl1	0	0.337779	0.374	0.014	0	5	Spdl1
Prr11	0	0.33369	0.315	0.006	0	5	Prr11
Gm11223	0	0.332643	0.326	0.017	0	5	Gm11223
Gm44297	0	0.33177	0.233	0.002	0	5	Gm44297
Depdc1a	0	0.32741	0.308	0.008	0	5	Depdc1a
Hist1h2bj	0	0.320791	0.323	0.015	0	5	Hist1h2bj
4930579G24Rik	0	0.318453	0.39	0.032	0	5	4930579G24Rik
Kif14	0	0.316146	0.293	0.005	0	5	Kif14
Lrr1	0	0.315413	0.319	0.011	0	5	Lrr1
Hist1h3f	0	0.315317	0.332	0.022	0	5	Hist1h3f
Parpbp	0	0.314124	0.307	0.008	0	5	Parpbp
Gtse1	0	0.311546	0.325	0.008	0	5	Gtse1
Poc1a	0	0.301073	0.353	0.015	0	5	Poc1a
Zwilch	0	0.296897	0.323	0.015	0	5	Zwilch
Mybl2	0	0.295582	0.292	0.014	0	5	Mybl2
Cenpk	0	0.2951	0.323	0.02	0	5	Cenpk
Cenpn	0	0.289172	0.303	0.007	0	5	Cenpn
Hist1h3c	0	0.281068	0.254	0.004	0	5	Hist1h3c
Mtfr2	0	0.279342	0.304	0.008	0	5	Mtfr2
4930427A07Rik	0	0.271204	0.284	0.012	0	5	4930427A07Rik
Fancd2	0	0.268285	0.278	0.007	0	5	Fancd2
Hist1h2bb	0	0.264423	0.259	0.006	0	5	Hist1h2bb
Gen1	0	0.260322	0.27	0.005	0	5	Gen1
Kifc5b	0	0.257312	0.266	0.009	0	5	Kifc5b
Ska3	0	0.255577	0.282	0.008	0	5	Ska3
Spag5	0	0.25371	0.255	0.007	0	5	Spag5
Cdkn2c	4.69243e-300	0.412553	0.467	0.058	9.84424e-296	5	Cdkn2c
Atad21	6.0435e-300	0.772088	0.824	0.203	1.26787e-295	5	Atad2
Hmgb1	8.28252e-299	0.924126	0.997	0.805	1.73759e-294	5	Hmgb1
Cdc25b	5.2738e-298	0.584084	0.533	0.078	1.10639e-293	5	Cdc25b
Tipin1	5.67876e-298	0.68151	0.827	0.198	1.19135e-293	5	Tipin
Ezh2	3.15043e-294	0.713975	0.827	0.207	6.60928e-290	5	Ezh2
Prim2	5.35369e-293	0.398773	0.465	0.061	1.12315e-288	5	Prim2
Hist1h4h	1.19989e-290	0.265011	0.277	0.017	2.51725e-286	5	Hist1h4h
Rcc1	1.18394e-287	0.380336	0.45	0.057	2.4838e-283	5	Rcc1
Cep128	1.34709e-286	0.309899	0.34	0.03	2.82607e-282	5	Cep128
Sass6	4.51444e-283	0.313487	0.417	0.048	9.47085e-279	5	Sass6
Orc61	2.07541e-282	0.54755	0.649	0.125	4.35399e-278	5	Orc6
Hist1h2al	5.24105e-282	0.594091	0.543	0.088	1.09952e-277	5	Hist1h2al
Haus4	8.38657e-279	0.4458	0.581	0.098	1.75942e-274	5	Haus4
Dbf4	4.39218e-277	0.445374	0.598	0.105	9.21435e-273	5	Dbf4
Dhfr1	7.2523e-275	0.412362	0.452	0.061	1.52146e-270	5	Dhfr
2700099C18Rik	1.91029e-272	0.282352	0.296	0.023	4.0076e-268	5	2700099C18Rik
Rangap1	3.04124e-272	0.567019	0.734	0.165	6.38023e-268	5	Rangap1
Reep4	9.97132e-272	0.517332	0.593	0.107	2.09188e-267	5	Reep4
H2afv	2.04753e-269	1.00481	0.97	0.415	4.29551e-265	5	H2afv
Cbx51	3.44427e-267	0.587072	0.718	0.161	7.22574e-263	5	Cbx5
Ran1	3.839e-263	0.858415	0.988	0.703	8.05383e-259	5	Ran
Ppia1	5.28192e-261	0.588967	0.999	0.994	1.10809e-256	5	Ppia
Apitd11	8.26919e-260	0.354976	0.426	0.056	1.73479e-255	5	Apitd1
Ckap5	4.99393e-254	0.595099	0.69	0.156	1.04768e-249	5	Ckap5
Rad21	2.59309e-253	0.832519	0.922	0.33	5.44005e-249	5	Rad21
Pcna1	1.74692e-245	0.688841	0.756	0.205	3.66487e-241	5	Pcna
Alyref1	5.80417e-245	0.70096	0.881	0.281	1.21766e-240	5	Alyref
Nsd2	5.3923e-243	0.639735	0.776	0.206	1.13125e-238	5	Nsd2
Nucks1	5.5046e-243	0.752487	0.921	0.32	1.15481e-238	5	Nucks1
Dek1	2.75303e-242	0.890434	0.977	0.461	5.77558e-238	5	Dek
Mcm31	5.10281e-242	0.630577	0.778	0.199	1.07052e-237	5	Mcm3
Ttf2	2.9003e-241	0.314686	0.371	0.045	6.08454e-237	5	Ttf2
Brca2	1.00694e-239	0.31967	0.349	0.04	2.11246e-235	5	Brca2
Haspin	3.7567e-236	0.297668	0.355	0.042	7.88119e-232	5	Haspin
Dctpp11	3.58469e-234	0.592536	0.756	0.202	7.52033e-230	5	Dctpp1
Dut1	6.13535e-233	0.894529	0.932	0.412	1.28713e-228	5	Dut
Ulbp1	1.25871e-230	0.361601	0.386	0.052	2.64065e-226	5	Ulbp1
Dnmt11	4.79222e-230	0.704271	0.817	0.251	1.00536e-225	5	Dnmt1
Anp32e	2.29683e-228	0.817166	0.963	0.464	4.81852e-224	5	Anp32e
Rbl1	4.55541e-227	0.418291	0.52	0.096	9.5568e-223	5	Rbl1
Lsm21	1.82421e-226	0.56818	0.843	0.246	3.827e-222	5	Lsm2
Pold11	4.3669e-223	0.345977	0.479	0.082	9.16131e-219	5	Pold1
Hells1	6.29851e-222	0.578955	0.678	0.165	1.32136e-217	5	Hells
Usp11	1.06146e-219	0.588643	0.846	0.253	2.22683e-215	5	Usp1
Gins21	3.02176e-215	0.33099	0.431	0.07	6.33934e-211	5	Gins2
Ccne2	4.31172e-214	0.264817	0.256	0.023	9.04556e-210	5	Ccne2
Rfwd3	1.97256e-213	0.321497	0.43	0.069	4.13824e-209	5	Rfwd3
Anapc51	2.21121e-211	0.610995	0.859	0.28	4.6389e-207	5	Anapc5
Csrp1	4.45533e-211	0.423787	0.632	0.146	9.34683e-207	5	Csrp1
Anp32b1	1.24316e-209	0.744858	0.984	0.634	2.60803e-205	5	Anp32b
Ncaph2	2.48322e-207	0.448297	0.722	0.187	5.20954e-203	5	Ncaph2
Nup85	2.04062e-205	0.331895	0.471	0.085	4.28102e-201	5	Nup85
Cenpc1	3.76019e-203	0.314586	0.431	0.072	7.88851e-199	5	Cenpc1
Rpa31	5.13511e-203	0.538659	0.804	0.242	1.07729e-198	5	Rpa3
Nde1	1.2135e-201	0.370745	0.578	0.125	2.5458e-197	5	Nde1
Rnaseh2b1	6.7472e-201	0.348977	0.536	0.112	1.4155e-196	5	Rnaseh2b
Ccne1	8.25492e-201	0.37083	0.413	0.07	1.7318e-196	5	Ccne1
Slc43a3	9.71237e-201	0.262142	0.302	0.036	2.03756e-196	5	Slc43a3
Rfc31	1.28649e-199	0.363557	0.494	0.097	2.69892e-195	5	Rfc3
Slbp1	2.07072e-198	0.748215	0.884	0.353	4.34417e-194	5	Slbp
Cenpa	3.55794e-198	0.824381	0.872	0.333	7.4642e-194	5	Cenpa
Mis18a	1.24817e-197	0.330958	0.629	0.144	2.61854e-193	5	Mis18a
Rmi21	2.80151e-196	0.280033	0.383	0.06	5.87729e-192	5	Rmi2
Hnrnpa31	5.48048e-196	0.67705	0.997	0.841	1.14975e-191	5	Hnrnpa3
Gins3	5.65723e-196	0.265303	0.311	0.039	1.18683e-191	5	Gins3
Phgdh1	1.46054e-195	0.494011	0.704	0.192	3.06406e-191	5	Phgdh
Kif151	9.59133e-194	0.456186	0.738	0.203	2.01216e-189	5	Kif15
Nasp1	2.01933e-193	0.498052	0.712	0.198	4.23634e-189	5	Nasp
Smc1a1	2.72437e-192	0.673069	0.926	0.383	5.71545e-188	5	Smc1a
Timeless1	5.28843e-192	0.265771	0.359	0.054	1.10946e-187	5	Timeless
Zfp367	6.40641e-192	0.325416	0.36	0.055	1.344e-187	5	Zfp367
Tagln2	5.25235e-186	0.731778	0.993	0.784	1.10189e-181	5	Tagln2
Rad18	1.51419e-185	0.293226	0.457	0.088	3.17662e-181	5	Rad18
Lsm3	1.62276e-185	0.461751	0.804	0.249	3.4044e-181	5	Lsm3
Ly6e1	2.7984e-184	0.966121	0.971	0.631	5.87077e-180	5	Ly6e
Fzr1	8.46479e-184	0.340379	0.503	0.105	1.77583e-179	5	Fzr1
Hist1h1c	1.65005e-182	0.575504	0.674	0.186	3.46163e-178	5	Hist1h1c
Topbp11	5.70551e-181	0.39402	0.583	0.141	1.19696e-176	5	Topbp1
Eri1	5.43946e-180	0.418956	0.653	0.173	1.14114e-175	5	Eri1
Wdr76	1.05651e-179	0.296506	0.432	0.082	2.21645e-175	5	Wdr76
Hnrnpab1	1.02033e-178	0.73555	0.952	0.514	2.14056e-174	5	Hnrnpab
Rbbp8	2.88327e-178	0.327179	0.533	0.119	6.04881e-174	5	Rbbp8
Tfdp11	7.92908e-178	0.390782	0.572	0.139	1.66344e-173	5	Tfdp1
Hat11	4.34502e-176	0.477378	0.7	0.204	9.11541e-172	5	Hat1
Psat11	6.96557e-176	0.409266	0.6	0.154	1.46131e-171	5	Psat1
Calm2	1.36783e-175	0.704074	0.988	0.671	2.86957e-171	5	Calm2
Impdh21	5.91184e-175	0.506222	0.791	0.259	1.24025e-170	5	Impdh2
Bub3	5.15015e-174	0.594797	0.869	0.337	1.08045e-169	5	Bub3
Cep295	8.05549e-174	0.281736	0.42	0.078	1.68996e-169	5	Cep295
Ppil1	2.29289e-173	0.305251	0.462	0.096	4.81026e-169	5	Ppil1
Syce21	2.39659e-172	0.30773	0.386	0.069	5.0278e-168	5	Syce2
Mcm61	6.05756e-172	0.528446	0.692	0.202	1.27082e-167	5	Mcm6
Nup37	2.55157e-169	0.260252	0.417	0.079	5.35293e-165	5	Nup37
Mcm41	3.19761e-168	0.538292	0.756	0.242	6.70827e-164	5	Mcm4
Siva11	4.37281e-166	0.489666	0.719	0.225	9.17373e-162	5	Siva1
Fkbp2	7.39936e-165	0.440117	0.741	0.229	1.55231e-160	5	Fkbp2
G2e3	8.18046e-163	0.261671	0.34	0.055	1.71618e-158	5	G2e3
Cep57	8.83145e-161	0.319546	0.558	0.138	1.85275e-156	5	Cep57
Cdk2	1.58818e-160	0.255006	0.341	0.058	3.33184e-156	5	Cdk2
Nxt1	1.20705e-158	0.359342	0.67	0.191	2.53227e-154	5	Nxt1
Naa40	2.56649e-158	0.294947	0.479	0.107	5.38424e-154	5	Naa40
Cdkn2d	1.04228e-157	0.542412	0.726	0.24	2.1866e-153	5	Cdkn2d
Nsmce1	1.78624e-157	0.297394	0.6	0.156	3.74736e-153	5	Nsmce1
Nap1l11	7.19896e-157	0.634109	0.932	0.478	1.51027e-152	5	Nap1l1
Mthfd2	2.33741e-156	0.424406	0.746	0.238	4.90365e-152	5	Mthfd2
Snrpd11	4.15904e-156	0.603725	0.92	0.441	8.72526e-152	5	Snrpd1
Slfn9	1.09363e-155	0.286964	0.374	0.071	2.29432e-151	5	Slfn9
Tubb6	8.74978e-155	0.391569	0.527	0.134	1.83562e-150	5	Tubb6
Rbm31	2.90508e-153	0.476807	0.992	0.919	6.09456e-149	5	Rbm3
Mcm21	2.77922e-152	0.3781	0.607	0.168	5.83053e-148	5	Mcm2
Hmgn5	5.98977e-152	0.302712	0.473	0.109	1.25659e-147	5	Hmgn5
Dtymk1	3.04599e-150	0.430152	0.715	0.231	6.39019e-146	5	Dtymk
Gm42047	4.23411e-150	0.26247	0.344	0.061	8.88275e-146	5	Gm42047
Banf11	4.6725e-150	0.563036	0.951	0.485	9.80244e-146	5	Banf1
Tuba1a	8.11025e-148	0.365574	0.621	0.179	1.70145e-143	5	Tuba1a
Odf2	1.92362e-147	0.316157	0.497	0.12	4.03557e-143	5	Odf2
Pih1d1	3.28164e-147	0.270406	0.543	0.138	6.88456e-143	5	Pih1d1
Exosc8	6.26633e-147	0.392375	0.769	0.257	1.31461e-142	5	Exosc8
Ilf2	6.92251e-146	0.250891	0.498	0.12	1.45227e-141	5	Ilf2
Ctcf	8.84708e-144	0.40155	0.724	0.235	1.85603e-139	5	Ctcf
Hpf11	1.68663e-143	0.455184	0.81	0.297	3.53838e-139	5	Hpf1
Hint11	6.85261e-143	0.523864	0.988	0.767	1.43761e-138	5	Hint1
Dnajc91	1.37567e-142	0.538413	0.925	0.436	2.88601e-138	5	Dnajc9
Suz12	1.53225e-142	0.385548	0.682	0.213	3.21451e-138	5	Suz12
Xpo1	3.70383e-142	0.334715	0.568	0.156	7.77026e-138	5	Xpo1
Hist4h4	4.38686e-141	0.276728	0.344	0.064	9.2032e-137	5	Hist4h4
Pcnt	9.07828e-141	0.282539	0.465	0.11	1.90453e-136	5	Pcnt
Lbr1	1.02184e-140	0.489346	0.879	0.35	2.14372e-136	5	Lbr
Trim59	3.10762e-140	0.388467	0.619	0.184	6.51947e-136	5	Trim59
Prdx4	1.99687e-139	0.259312	0.33	0.061	4.18922e-135	5	Prdx4
Aaas	3.47874e-139	0.259157	0.477	0.118	7.29805e-135	5	Aaas
Rbbp71	8.73531e-139	0.569918	0.922	0.46	1.83258e-134	5	Rbbp7
Cdca4	1.03443e-138	0.359962	0.705	0.226	2.17014e-134	5	Cdca4
Rnaseh2c	2.56555e-138	0.37882	0.757	0.257	5.38226e-134	5	Rnaseh2c
Rpa11	7.4174e-138	0.388792	0.685	0.222	1.5561e-133	5	Rpa1
Dtl1	8.78609e-138	0.279087	0.345	0.068	1.84323e-133	5	Dtl
Cep83	1.12448e-137	0.286957	0.613	0.176	2.35905e-133	5	Cep83
Anapc15	2.45516e-137	0.261853	0.454	0.109	5.15068e-133	5	Anapc15
Tuba4a	7.06598e-137	0.299161	0.509	0.133	1.48237e-132	5	Tuba4a
Gm61661	3.51527e-134	0.339346	0.469	0.12	7.37468e-130	5	Gm6166
Ssrp11	1.74227e-133	0.513132	0.877	0.397	3.65512e-129	5	Ssrp1
Bex3	6.40812e-133	0.354305	0.698	0.231	1.34436e-128	5	Bex3
Smc3	1.40942e-132	0.408212	0.81	0.301	2.95682e-128	5	Smc3
Sae1	2.53352e-132	0.418813	0.82	0.309	5.31508e-128	5	Sae1
Fam111a	9.38232e-131	0.260387	0.443	0.107	1.96832e-126	5	Fam111a
Cbfb	2.05565e-130	0.373302	0.718	0.241	4.31255e-126	5	Cbfb
Cmtm7	2.80181e-130	0.599169	0.861	0.404	5.87791e-126	5	Cmtm7
Ranbp11	5.96583e-130	0.5845	0.929	0.521	1.25157e-125	5	Ranbp1
Rad50	2.99421e-129	0.301227	0.574	0.168	6.28156e-125	5	Rad50
Cdk41	2.24812e-128	0.487504	0.842	0.353	4.71633e-124	5	Cdk4
Rbbp41	1.79314e-127	0.534496	0.944	0.531	3.76184e-123	5	Rbbp4
Psip1	2.71637e-126	0.430129	0.817	0.32	5.69868e-122	5	Psip1
Vars	9.61254e-126	0.277822	0.633	0.195	2.01661e-121	5	Vars
Rfc11	9.41666e-125	0.357595	0.632	0.204	1.97552e-120	5	Rfc1
Supt16	4.72332e-124	0.386949	0.795	0.299	9.90905e-120	5	Supt16
Sdf2l11	1.08036e-123	0.418976	0.764	0.287	2.26649e-119	5	Sdf2l1
Ywhah1	1.80693e-123	0.528391	0.98	0.63	3.79076e-119	5	Ywhah
Rfc21	6.13444e-123	0.416642	0.805	0.312	1.28694e-118	5	Rfc2
Smchd1	6.27122e-123	0.374798	0.825	0.315	1.31564e-118	5	Smchd1
Srsf3	8.9395e-123	0.530229	0.917	0.474	1.87542e-118	5	Srsf3
Lsm5	2.72865e-122	0.485026	0.92	0.448	5.72443e-118	5	Lsm5
Ddx39	5.79143e-122	0.448204	0.832	0.342	1.21498e-117	5	Ddx39
Rif1	6.92546e-121	0.290635	0.568	0.17	1.45289e-116	5	Rif1
Baz1b	1.24158e-120	0.365033	0.737	0.265	2.6047e-116	5	Baz1b
Coro1c	2.27548e-120	0.27121	0.531	0.153	4.77373e-116	5	Coro1c
Hdgf	2.28241e-119	0.458544	0.817	0.337	4.78826e-115	5	Hdgf
Uchl5	9.6764e-118	0.303406	0.618	0.198	2.03001e-113	5	Uchl5
Snrpe1	2.72238e-117	0.47954	0.978	0.722	5.71129e-113	5	Snrpe
Srsf21	4.03621e-116	0.502169	0.933	0.488	8.46757e-112	5	Srsf2
Smarcc1	7.45093e-115	0.344749	0.629	0.211	1.56313e-110	5	Smarcc1
Prelid3b1	5.79418e-113	0.300215	0.683	0.235	1.21556e-108	5	Prelid3b
Gltp	5.94041e-112	0.381829	0.808	0.326	1.24624e-107	5	Gltp
Pbdc1	1.88304e-111	0.345039	0.704	0.259	3.95044e-107	5	Pbdc1
Cbx3	7.78091e-111	0.403155	0.851	0.364	1.63236e-106	5	Cbx3
Arl6ip1	1.29043e-110	0.757958	0.992	0.822	2.7072e-106	5	Arl6ip1
Nutf21	4.05256e-109	0.399881	0.798	0.329	8.50187e-105	5	Nutf2
Tceal9	4.09445e-108	0.250474	0.562	0.178	8.58975e-104	5	Tceal9
Cbx1	1.1953e-107	0.347739	0.816	0.33	2.50763e-103	5	Cbx1
Kpnb1	6.01364e-107	0.360397	0.744	0.29	1.2616e-102	5	Kpnb1
Pa2g41	1.30179e-105	0.46005	0.898	0.449	2.73103e-101	5	Pa2g4
Nelfe	3.66717e-105	0.256001	0.502	0.153	7.69335e-101	5	Nelfe
Jpt1	3.77507e-105	0.543706	0.962	0.615	7.91972e-101	5	Jpt1
Mrpl51	1.46502e-103	0.259252	0.611	0.207	3.07347e-99	5	Mrpl51
Mrpl181	4.48646e-103	0.395664	0.827	0.369	9.41215e-99	5	Mrpl18
Ybx11	9.16799e-103	0.421937	0.989	0.845	1.92335e-98	5	Ybx1
Anapc11	1.77331e-100	0.410649	0.884	0.416	3.72023e-96	5	Anapc11
Txn11	2.4895e-100	0.451601	0.975	0.694	5.22271e-96	5	Txn1
Srrt	3.46427e-100	0.286988	0.658	0.234	7.2677e-96	5	Srrt
Pbrm1	4.3815e-100	0.280467	0.668	0.238	9.19196e-96	5	Pbrm1
Cisd11	1.27126e-99	0.286472	0.64	0.23	2.66698e-95	5	Cisd1
Slc29a1	2.58202e-96	0.315904	0.61	0.221	5.41683e-92	5	Slc29a1
Nudt21	1.361e-95	0.378556	0.869	0.409	2.85525e-91	5	Nudt21
Ssna1	5.84082e-94	0.301627	0.768	0.315	1.22535e-89	5	Ssna1
CAAA01147332.1	2.4953e-93	0.399114	0.881	0.428	5.23488e-89	5	CAAA01147332.1
Hnrnpd	7.60825e-92	0.346919	0.808	0.355	1.59614e-87	5	Hnrnpd
Med30	8.16385e-92	0.277388	0.707	0.274	1.71269e-87	5	Med30
Atpif11	1.06314e-91	0.405171	0.917	0.473	2.23035e-87	5	Atpif1
Rpa21	1.02327e-90	0.313739	0.698	0.276	2.14672e-86	5	Rpa2
Dpy301	1.68958e-89	0.312226	0.759	0.321	3.54457e-85	5	Dpy30
Serinc3	4.78144e-87	0.4711	0.926	0.554	1.0031e-82	5	Serinc3
Hsp90aa1	3.08998e-86	0.360547	0.948	0.572	6.48248e-82	5	Hsp90aa1
Hnrnpu1	1.18878e-85	0.426848	0.992	0.722	2.49395e-81	5	Hnrnpu
Hnrnpul1	5.54228e-84	0.256351	0.688	0.27	1.16272e-79	5	Hnrnpul1
Hsp90b1	3.00441e-83	0.406795	0.981	0.793	6.30296e-79	5	Hsp90b1
Slc25a51	3.34457e-83	0.42819	0.965	0.691	7.01657e-79	5	Slc25a5
Nudc	8.87713e-83	0.332904	0.828	0.387	1.86233e-78	5	Nudc
Oxct11	1.79916e-82	0.312077	0.715	0.303	3.77446e-78	5	Oxct1
Uba2	7.49137e-81	0.282878	0.746	0.318	1.57161e-76	5	Uba2
Hnrnpa2b1	1.19997e-80	0.354189	0.997	0.925	2.51741e-76	5	Hnrnpa2b1
Xist	2.16579e-80	0.493497	0.97	0.62	4.5436e-76	5	Xist
Srsf71	2.11623e-79	0.383122	0.943	0.538	4.43963e-75	5	Srsf7
Lsm6	3.4091e-79	0.297089	0.814	0.368	7.15196e-75	5	Lsm6
Nono	3.66503e-79	0.361806	0.903	0.48	7.68887e-75	5	Nono
1810037I17Rik1	6.30594e-79	0.4265	0.956	0.666	1.32292e-74	5	1810037I17Rik
Ipo51	1.38353e-77	0.295253	0.578	0.23	2.90251e-73	5	Ipo5
U2af11	9.80129e-77	0.315298	0.828	0.394	2.05621e-72	5	U2af1
Cenpx	1.5942e-75	0.295336	0.842	0.399	3.34447e-71	5	Cenpx
G3bp11	3.89076e-75	0.303516	0.84	0.4	8.16242e-71	5	G3bp1
Nans1	9.11329e-75	0.261443	0.735	0.315	1.91188e-70	5	Nans
Smc6	3.1664e-73	0.327574	0.909	0.475	6.64278e-69	5	Smc6
Ddx39b	1.85915e-72	0.369493	0.932	0.548	3.9003e-68	5	Ddx39b
Rtn3	3.65093e-72	0.277906	0.809	0.37	7.65928e-68	5	Rtn3
Tra2b	1.03548e-71	0.304654	0.858	0.423	2.17234e-67	5	Tra2b
Prdx11	2.49924e-71	0.39145	0.978	0.776	5.24315e-67	5	Prdx1
Paics1	3.64864e-71	0.338305	0.797	0.394	7.65447e-67	5	Paics
Hprt1	5.79697e-71	0.357732	0.896	0.513	1.21615e-66	5	Hprt
Clic1	1.13509e-70	0.306268	0.992	0.913	2.38131e-66	5	Clic1
Lsm81	9.80292e-70	0.258793	0.82	0.384	2.05655e-65	5	Lsm8
Raly	1.17367e-69	0.333674	0.911	0.504	2.46225e-65	5	Raly
Hnrnpa11	2.57266e-69	0.36311	0.929	0.572	5.39717e-65	5	Hnrnpa1
Cox5b	1.84952e-68	0.324395	0.982	0.827	3.8801e-64	5	Cox5b
H3f3a	3.37703e-68	0.324382	0.989	0.854	7.08467e-64	5	H3f3a
Mrpl421	9.14558e-68	0.273583	0.776	0.363	1.91865e-63	5	Mrpl42
Magoh	1.29025e-65	0.266521	0.825	0.399	2.70681e-61	5	Magoh
Arsb2	1.71618e-65	0.27667	0.712	0.323	3.60037e-61	5	Arsb
Rps27l1	2.15341e-65	0.368025	0.864	0.469	4.51764e-61	5	Rps27l
Txnl1	4.52074e-65	0.276862	0.829	0.407	9.48407e-61	5	Txnl1
Smarca5	1.83205e-64	0.299307	0.891	0.475	3.84346e-60	5	Smarca5
Snrpb1	1.45891e-62	0.318503	0.947	0.6	3.06064e-58	5	Snrpb
Sumo2	2.54117e-62	0.320671	0.977	0.762	5.33113e-58	5	Sumo2
Mapre1	4.08254e-62	0.2717	0.885	0.463	8.56477e-58	5	Mapre1
Actg1	2.13444e-59	0.275739	0.997	0.995	4.47784e-55	5	Actg1
Hnrnpf	5.13049e-59	0.300273	0.986	0.806	1.07633e-54	5	Hnrnpf
Cntrl	5.50155e-59	0.266206	0.842	0.434	1.15417e-54	5	Cntrl
Lsm4	6.53155e-59	0.257587	0.825	0.423	1.37025e-54	5	Lsm4
Set1	1.06155e-58	0.34611	0.958	0.635	2.22703e-54	5	Set
Plp2	1.09117e-57	0.31912	0.929	0.579	2.28917e-53	5	Plp2
Actn4	1.1466e-57	0.306081	0.898	0.508	2.40545e-53	5	Actn4
Tcp11	1.94134e-57	0.303024	0.885	0.5	4.07274e-53	5	Tcp1
Atp5g31	7.99961e-56	0.301876	0.988	0.868	1.67824e-51	5	Atp5g3
Tkt1	2.80155e-55	0.288938	0.857	0.468	5.87738e-51	5	Tkt
Spp12	3.00856e-55	0.393374	0.678	0.348	6.31165e-51	5	Spp1
Calm3	1.0467e-54	0.316733	0.928	0.569	2.19587e-50	5	Calm3
Ptges3	1.24791e-54	0.26896	0.914	0.524	2.61798e-50	5	Ptges3
Pcbp2	1.08884e-53	0.261311	0.948	0.585	2.28428e-49	5	Pcbp2
Hspa8	1.10984e-53	0.257045	0.988	0.804	2.32834e-49	5	Hspa8
Fus	1.4785e-53	0.329611	0.922	0.579	3.10174e-49	5	Fus
Dhx9	1.73568e-53	0.251569	0.794	0.405	3.64128e-49	5	Dhx9
Snrpf1	1.4903e-51	0.2705	0.892	0.51	3.12651e-47	5	Snrpf
Cox5a1	1.46289e-50	0.276649	0.98	0.804	3.06899e-46	5	Cox5a
Cdkn1a1	3.74543e-50	0.324571	0.271	0.091	7.85754e-46	5	Cdkn1a
Manf	7.61985e-50	0.268081	0.915	0.536	1.59857e-45	5	Manf
Ncl1	7.95974e-50	0.294649	0.969	0.688	1.66987e-45	5	Ncl
Sf3b2	1.96818e-48	0.27588	0.939	0.59	4.12904e-44	5	Sf3b2
Snrpg	4.54487e-47	0.266518	0.958	0.647	9.53469e-43	5	Snrpg
Atp5o	6.60565e-47	0.264671	0.962	0.629	1.3858e-42	5	Atp5o
Lgals12	9.81708e-47	0.293547	0.989	0.885	2.05952e-42	5	Lgals1
Cox6a11	3.31409e-46	0.279968	0.948	0.682	6.95263e-42	5	Cox6a1
Tpm4	1.03736e-45	0.253004	0.894	0.525	2.17628e-41	5	Tpm4
Cycs1	1.08804e-44	0.297067	0.921	0.612	2.2826e-40	5	Cycs
Sec11c	1.12945e-44	0.26067	0.896	0.567	2.36948e-40	5	Sec11c
Eif4a11	1.26156e-43	0.261804	0.948	0.67	2.64662e-39	5	Eif4a1
Cox7a2	1.75566e-42	0.263191	0.973	0.771	3.6832e-38	5	Cox7a2
Hp1bp3	2.7115e-42	0.251302	0.849	0.484	5.68845e-38	5	Hp1bp3
Atp5b1	1.6967e-41	0.258928	0.977	0.784	3.5595e-37	5	Atp5b
Ywhae	1.1182e-40	0.257963	0.933	0.601	2.34586e-36	5	Ywhae
Ldha1	2.39066e-39	0.28729	0.984	0.875	5.01536e-35	5	Ldha
Vim1	1.99292e-37	0.266839	0.988	0.837	4.18095e-33	5	Vim
Tpi12	3.00988e-33	0.2503	0.91	0.614	6.31442e-29	5	Tpi1
Mt13	1.36008e-31	0.44758	0.304	0.137	2.85331e-27	5	Mt1
Trgv21	6.45381e-28	0.328977	0.231	0.098	1.35394e-23	5	Trgv2
Klra51	4.6175e-16	0.252516	0.175	0.083	9.68704e-12	5	Klra5
Ccl31	4.14418e-176	2.40421	0.704	0.253	8.69407e-172	6	Ccl3
Ccl41	6.39785e-157	2.81	0.802	0.447	1.3422e-152	6	Ccl4
Il2	2.85183e-154	2.5897	0.146	0.008	5.98286e-150	6	Il2
Gadd45b1	5.65835e-146	1.15321	0.624	0.195	1.18706e-141	6	Gadd45b
Utf1	1.30248e-145	0.80347	0.387	0.077	2.73248e-141	6	Utf1
Npm11	4.99112e-137	0.921995	0.96	0.879	1.04709e-132	6	Npm1
Ddx21	9.15229e-133	0.941465	0.768	0.381	1.92006e-128	6	Ddx21
Srm1	5.36031e-132	0.822154	0.491	0.141	1.12454e-127	6	Srm
Nr4a1	3.40627e-125	1.31819	0.663	0.26	7.14601e-121	6	Nr4a1
Nfkbid	2.21845e-122	1.11057	0.352	0.075	4.65409e-118	6	Nfkbid
Xcl1	4.22757e-122	2.18915	0.574	0.207	8.86903e-118	6	Xcl1
Eif4a12	4.39879e-122	0.816977	0.902	0.677	9.22823e-118	6	Eif4a1
Fbl1	1.74847e-120	0.884467	0.73	0.365	3.66811e-116	6	Fbl
Nr4a3	3.66317e-118	1.1763	0.603	0.235	7.68496e-114	6	Nr4a3
Hsp90ab1	2.40203e-117	0.624916	0.995	0.969	5.03922e-113	6	Hsp90ab1
Crtam1	2.44584e-115	1.07016	0.533	0.181	5.13113e-111	6	Crtam
Tnfsf14	1.28381e-113	0.739359	0.311	0.061	2.69331e-109	6	Tnfsf14
Eif5a1	8.49703e-113	0.736706	0.96	0.847	1.78259e-108	6	Eif5a
Hspd11	4.18925e-106	0.885261	0.808	0.496	8.78862e-102	6	Hspd1
C1qbp1	8.03163e-104	0.858809	0.699	0.37	1.68496e-99	6	C1qbp
Ppan	1.71513e-102	0.649154	0.438	0.133	3.59817e-98	6	Ppan
Ncl2	1.01189e-100	0.905499	0.875	0.698	2.12285e-96	6	Ncl
Mybbp1a1	2.68424e-98	0.785988	0.607	0.264	5.63126e-94	6	Mybbp1a
Srgn1	1.33102e-96	0.819996	0.957	0.957	2.79235e-92	6	Srgn
Ifng1	2.43571e-93	2.582	0.747	0.526	5.10988e-89	6	Ifng
Nop581	2.62052e-90	0.751773	0.641	0.318	5.49759e-86	6	Nop58
Cnbp	7.62982e-90	0.564682	0.954	0.848	1.60066e-85	6	Cnbp
Kdm6b	1.21879e-87	0.516753	0.27	0.058	2.55689e-83	6	Kdm6b
Csf2	5.92443e-87	2.03329	0.208	0.036	1.24289e-82	6	Csf2
Hspe1	1.39283e-85	0.645276	0.864	0.662	2.92201e-81	6	Hspe1
Eef1e1	5.04213e-85	0.708212	0.543	0.234	1.05779e-80	6	Eef1e1
Nop16	1.00258e-83	0.610465	0.412	0.139	2.1033e-79	6	Nop16
Pus7	1.04848e-83	0.472519	0.285	0.069	2.1996e-79	6	Pus7
Hspa91	1.11266e-75	0.647178	0.581	0.279	2.33425e-71	6	Hspa9
Mettl1	1.23257e-73	0.530548	0.309	0.088	2.58582e-69	6	Mettl1
Snhg15	4.41476e-72	0.52417	0.29	0.078	9.26172e-68	6	Snhg15
Pa2g42	8.43238e-72	0.723768	0.734	0.465	1.76903e-67	6	Pa2g4
Rgcc	1.1072e-70	0.619847	0.268	0.068	2.3228e-66	6	Rgcc
Nhp21	1.39014e-70	0.66167	0.629	0.343	2.91638e-66	6	Nhp2
Mrto4	4.84262e-70	0.636366	0.479	0.203	1.01593e-65	6	Mrto4
Rrp15	5.56758e-70	0.499206	0.344	0.11	1.16802e-65	6	Rrp15
Mif2	1.37229e-69	0.669358	0.895	0.754	2.87893e-65	6	Mif
Snhg1	1.03045e-68	0.615431	0.644	0.351	2.16177e-64	6	Snhg1
Rps21	2.76948e-68	0.510946	0.978	0.943	5.81009e-64	6	Rps2
M6pr	7.12983e-66	0.678929	0.718	0.477	1.49577e-61	6	M6pr
Nme21	5.10178e-62	0.603797	0.782	0.576	1.0703e-57	6	Nme2
Tnf	1.04735e-61	1.47841	0.485	0.218	2.19723e-57	6	Tnf
Cd40lg1	9.26731e-61	1.04975	0.296	0.091	1.94419e-56	6	Cd40lg
Ipo4	2.43319e-59	0.407664	0.253	0.071	5.10459e-55	6	Ipo4
Rel	7.62101e-58	0.696326	0.543	0.265	1.59881e-53	6	Rel
Cycs2	2.94127e-57	0.560963	0.813	0.623	6.17049e-53	6	Cycs
Nolc11	4.78656e-57	0.572127	0.442	0.197	1.00417e-52	6	Nolc1
Zbtb321	4.86919e-57	0.700843	0.56	0.307	1.02151e-52	6	Zbtb32
Gar11	1.99766e-56	0.506534	0.435	0.191	4.19089e-52	6	Gar1
Myc	5.91965e-56	0.849622	0.388	0.158	1.24188e-51	6	Myc
Ptma2	1.04289e-55	0.40575	0.988	0.975	2.18788e-51	6	Ptma
Cct21	6.76525e-55	0.520271	0.785	0.587	1.41928e-50	6	Cct2
Ppa11	1.59325e-53	0.542774	0.536	0.279	3.34248e-49	6	Ppa1
Ran2	3.22092e-53	0.512487	0.88	0.714	6.75716e-49	6	Ran
Gnl3	8.55687e-53	0.460554	0.32	0.115	1.79514e-48	6	Gnl3
Gtpbp4	5.43732e-52	0.564	0.538	0.294	1.1407e-47	6	Gtpbp4
Rrp9	5.92452e-52	0.376403	0.258	0.08	1.2429e-47	6	Rrp9
Cct81	6.66792e-52	0.526031	0.718	0.503	1.39886e-47	6	Cct8
Rps25	1.23734e-51	0.39374	0.935	0.864	2.59581e-47	6	Rps25
Ranbp12	3.2626e-51	0.545838	0.773	0.536	6.84461e-47	6	Ranbp1
Mir155hg	3.88825e-51	0.716402	0.376	0.156	8.15716e-47	6	Mir155hg
Nfkbib	1.45169e-50	0.634239	0.6	0.361	3.04549e-46	6	Nfkbib
Cct51	3.0391e-50	0.515792	0.716	0.494	6.37573e-46	6	Cct5
Nsun21	3.84824e-49	0.493532	0.476	0.235	8.07322e-45	6	Nsun2
Mdn1	5.45188e-49	0.355781	0.265	0.086	1.14375e-44	6	Mdn1
Nop2	1.0013e-48	0.436788	0.273	0.093	2.10062e-44	6	Nop2
Zeb21	1.94998e-48	0.559793	0.471	0.23	4.09086e-44	6	Zeb2
Tsr1	3.06726e-48	0.41876	0.289	0.102	6.4348e-44	6	Tsr1
Map2k31	8.13966e-48	0.602546	0.572	0.344	1.70762e-43	6	Map2k3
Hccs	1.48328e-46	0.48217	0.428	0.201	3.11178e-42	6	Hccs
Snrpd3	2.13781e-46	0.494278	0.749	0.561	4.48492e-42	6	Snrpd3
Pno1	6.78745e-46	0.449215	0.399	0.181	1.42394e-41	6	Pno1
Cct6a1	1.09597e-45	0.567682	0.588	0.37	2.29923e-41	6	Cct6a
Ebna1bp2	1.13266e-45	0.552227	0.524	0.303	2.37621e-41	6	Ebna1bp2
Nop561	1.63372e-45	0.550427	0.466	0.238	3.42739e-41	6	Nop56
Gm15459	2.81989e-45	0.369289	0.981	0.94	5.91584e-41	6	Gm15459
Grwd1	6.18936e-45	0.282033	0.21	0.061	1.29846e-40	6	Grwd1
Il2ra1	2.99867e-44	0.653036	0.507	0.283	6.29091e-40	6	Il2ra
Rsl1d11	1.18337e-43	0.489843	0.627	0.403	2.48258e-39	6	Rsl1d1
Wdr75	1.69574e-43	0.4352	0.376	0.169	3.5575e-39	6	Wdr75
Ehd11	5.24797e-43	0.546029	0.536	0.305	1.10097e-38	6	Ehd1
Hnrnpdl	7.59825e-43	0.50824	0.689	0.49	1.59404e-38	6	Hnrnpdl
1110038B12Rik	1.21445e-42	0.609603	0.471	0.263	2.54779e-38	6	1110038B12Rik
Etf1	2.12772e-42	0.530025	0.565	0.342	4.46374e-38	6	Etf1
Rps171	2.57858e-42	0.402663	0.905	0.808	5.4096e-38	6	Rps17
Tomm40	5.45048e-42	0.458414	0.433	0.219	1.14346e-37	6	Tomm40
Tagap1	9.02304e-42	0.515856	0.385	0.169	1.89294e-37	6	Tagap
Havcr22	3.62985e-41	0.652434	0.6	0.376	7.61505e-37	6	Havcr2
Rrs1	3.9434e-41	0.405302	0.308	0.125	8.27286e-37	6	Rrs1
Eif2s11	1.34092e-40	0.465576	0.662	0.462	2.81312e-36	6	Eif2s1
Ftsj3	1.43083e-40	0.457505	0.363	0.167	3.00174e-36	6	Ftsj3
Ccl11	5.14719e-40	1.69725	0.271	0.105	1.07983e-35	6	Ccl1
Noc3l	5.43566e-40	0.361893	0.253	0.09	1.14035e-35	6	Noc3l
Timm10	1.19996e-39	0.348885	0.285	0.11	2.51739e-35	6	Timm10
Mphosph10	1.5405e-39	0.448853	0.397	0.192	3.23181e-35	6	Mphosph10
Ndufaf4	2.25912e-39	0.397881	0.308	0.127	4.73941e-35	6	Ndufaf4
Tomm20	2.7507e-39	0.451776	0.73	0.548	5.7707e-35	6	Tomm20
Rcl1	3.10119e-39	0.375959	0.258	0.096	6.50599e-35	6	Rcl1
Ifrd2	3.98168e-39	0.346208	0.179	0.052	8.35316e-35	6	Ifrd2
Apex11	7.09272e-39	0.438207	0.318	0.137	1.48798e-34	6	Apex1
Mpzl2	1.16932e-38	0.264337	0.101	0.019	2.45312e-34	6	Mpzl2
Atad3a	1.25518e-38	0.389312	0.235	0.083	2.63324e-34	6	Atad3a
Wdr43	3.19366e-38	0.49236	0.464	0.25	6.69997e-34	6	Wdr43
Hnrnpab2	3.54311e-38	0.45839	0.741	0.533	7.43309e-34	6	Hnrnpab
Slamf71	6.47409e-38	0.5468	0.375	0.173	1.3582e-33	6	Slamf7
Hmgn1	1.43116e-37	0.438142	0.452	0.234	3.00242e-33	6	Hmgn1
Sema7a1	2.40366e-37	0.359492	0.266	0.099	5.04264e-33	6	Sema7a
Rilpl2	2.85914e-37	0.528665	0.574	0.36	5.99818e-33	6	Rilpl2
Top1	3.09483e-37	0.483797	0.674	0.464	6.49264e-33	6	Top1
Hnrnpa12	4.61812e-36	0.443875	0.741	0.588	9.68835e-32	6	Hnrnpa1
Tbl3	6.14126e-36	0.297207	0.241	0.088	1.28837e-31	6	Tbl3
Serbp11	8.0325e-36	0.354036	0.928	0.84	1.68514e-31	6	Serbp1
Snu131	2.385e-35	0.456905	0.591	0.385	5.0035e-31	6	Snu13
Psme2	2.84105e-35	0.43371	0.888	0.813	5.96024e-31	6	Psme2
Ptges31	5.13223e-35	0.403652	0.744	0.54	1.07669e-30	6	Ptges3
Prmt11	1.04654e-34	0.453033	0.564	0.372	2.19554e-30	6	Prmt1
Bcat1	2.33289e-34	0.250237	0.198	0.066	4.89417e-30	6	Bcat1
Snrpf2	3.80329e-34	0.442255	0.691	0.528	7.97893e-30	6	Snrpf
Mrps28	4.11592e-34	0.390821	0.404	0.209	8.63479e-30	6	Mrps28
Tma16	7.098e-34	0.297152	0.203	0.069	1.48909e-29	6	Tma16
Atp5b2	1.22066e-33	0.356789	0.875	0.793	2.56082e-29	6	Atp5b
Nle1	1.88745e-33	0.270364	0.174	0.054	3.95967e-29	6	Nle1
Heatr1	2.08669e-33	0.367252	0.258	0.104	4.37766e-29	6	Heatr1
Zfp593	4.6523e-33	0.351361	0.29	0.126	9.76005e-29	6	Zfp593
Lyar	4.79044e-33	0.408192	0.405	0.219	1.00499e-28	6	Lyar
Wdr12	7.20858e-33	0.365687	0.251	0.101	1.51229e-28	6	Wdr12
Timm9	1.17201e-32	0.300058	0.227	0.085	2.45875e-28	6	Timm9
Nip7	1.55612e-32	0.38048	0.368	0.185	3.26459e-28	6	Nip7
Uck2	2.63885e-32	0.366591	0.306	0.14	5.53605e-28	6	Uck2
Gpr651	2.87252e-32	0.494391	0.455	0.26	6.02625e-28	6	Gpr65
Ccdc86	5.49611e-32	0.311308	0.227	0.086	1.15303e-27	6	Ccdc86
Gramd1b	9.91133e-32	0.422047	0.407	0.212	2.0793e-27	6	Gramd1b
Cd1601	1.59382e-31	0.581213	0.524	0.33	3.34366e-27	6	Cd160
Set2	2.56962e-31	0.421294	0.787	0.65	5.3908e-27	6	Set
Tomm5	3.68641e-31	0.473923	0.581	0.403	7.73373e-27	6	Tomm5
Dot1l	7.77206e-31	0.299749	0.199	0.071	1.6305e-26	6	Dot1l
Eif4e	8.74928e-31	0.425385	0.562	0.369	1.83551e-26	6	Eif4e
Cct31	1.30625e-30	0.426074	0.514	0.332	2.74038e-26	6	Cct3
Timm17a	1.59589e-30	0.405082	0.521	0.336	3.34801e-26	6	Timm17a
Gpatch4	1.90779e-30	0.300578	0.208	0.077	4.00234e-26	6	Gpatch4
Pum3	3.15114e-30	0.445568	0.423	0.242	6.61077e-26	6	Pum3
Hspa81	5.30111e-30	0.343377	0.895	0.813	1.11212e-25	6	Hspa8
Hspa5	6.45847e-30	0.407225	0.885	0.779	1.35492e-25	6	Hspa5
Pim11	9.83239e-30	0.742114	0.514	0.331	2.06274e-25	6	Pim1
Srsf72	1.10078e-29	0.398299	0.727	0.557	2.30933e-25	6	Srsf7
Sdad1	1.69377e-29	0.356876	0.277	0.123	3.55337e-25	6	Sdad1
Magoh1	1.91567e-29	0.397417	0.596	0.419	4.01888e-25	6	Magoh
Pfdn2	2.88033e-29	0.351701	0.615	0.424	6.04264e-25	6	Pfdn2
Eif1ax1	8.08989e-29	0.436151	0.545	0.373	1.69718e-24	6	Eif1ax
Srsf22	8.21154e-29	0.396739	0.696	0.509	1.7227e-24	6	Srsf2
Rps2-ps101	9.75571e-29	0.390294	0.742	0.597	2.04665e-24	6	Rps2-ps10
Cct71	1.3552e-28	0.358988	0.72	0.551	2.84307e-24	6	Cct7
Egr21	2.24844e-28	0.291339	0.143	0.043	4.717e-24	6	Egr2
Ctps	2.30989e-28	0.32227	0.198	0.076	4.84591e-24	6	Ctps
Phb21	2.95967e-28	0.398606	0.639	0.471	6.20908e-24	6	Phb2
Emc6	3.18277e-28	0.390926	0.5	0.324	6.67713e-24	6	Emc6
Snrpd12	5.48881e-28	0.405081	0.644	0.464	1.1515e-23	6	Snrpd1
Slc25a52	5.85842e-28	0.357459	0.833	0.703	1.22904e-23	6	Slc25a5
Gch1	6.09525e-28	0.425868	0.38	0.205	1.27872e-23	6	Gch1
Mrpl121	8.1196e-28	0.380042	0.507	0.332	1.70341e-23	6	Mrpl12
Eprs	9.01714e-28	0.421371	0.517	0.337	1.89171e-23	6	Eprs
Mak16	1.03849e-27	0.353102	0.428	0.249	2.17865e-23	6	Mak16
Ddx27	2.37307e-27	0.378979	0.433	0.253	4.97846e-23	6	Ddx27
Ltv1	3.9681e-27	0.331201	0.241	0.104	8.32469e-23	6	Ltv1
Zc3h15	3.99618e-27	0.378479	0.692	0.538	8.38359e-23	6	Zc3h15
Sssca1	7.22455e-27	0.350303	0.338	0.174	1.51564e-22	6	Sssca1
Ipo52	1.93975e-26	0.429907	0.414	0.245	4.06941e-22	6	Ipo5
Eea11	1.9915e-26	0.527282	0.493	0.328	4.17797e-22	6	Eea1
Gnl2	2.57963e-26	0.371851	0.349	0.186	5.41181e-22	6	Gnl2
Snrpd2	2.89164e-26	0.360643	0.73	0.584	6.06637e-22	6	Snrpd2
Ybx12	8.6773e-26	0.32867	0.914	0.851	1.82041e-21	6	Ybx1
Chchd4	2.39736e-25	0.257621	0.199	0.08	5.02942e-21	6	Chchd4
Utp20	3.00814e-25	0.257808	0.201	0.081	6.31077e-21	6	Utp20
Tcp12	4.4357e-25	0.378623	0.66	0.519	9.30564e-21	6	Tcp1
Noc2l	4.61434e-25	0.267627	0.259	0.119	9.68041e-21	6	Noc2l
Hspa4	5.30519e-25	0.347973	0.651	0.505	1.11298e-20	6	Hspa4
Ppp1r14b	6.76636e-25	0.292289	0.239	0.106	1.41952e-20	6	Ppp1r14b
Lap3	7.95767e-25	0.305855	0.235	0.105	1.66944e-20	6	Lap3
Odc1	9.16097e-25	0.326453	0.38	0.214	1.92188e-20	6	Odc1
Larp4	1.67949e-24	0.305308	0.309	0.159	3.52339e-20	6	Larp4
Lta1	2.20699e-24	0.596	0.318	0.167	4.63004e-20	6	Lta
Nfkbiz	3.44929e-24	0.478981	0.46	0.277	7.23626e-20	6	Nfkbiz
Perp	4.69664e-24	0.351353	0.153	0.053	9.85307e-20	6	Perp
Polr2l1	5.62564e-24	0.402631	0.596	0.447	1.1802e-19	6	Polr2l
Brix1	6.55782e-24	0.311691	0.397	0.23	1.37576e-19	6	Brix1
Tnfrsf91	9.15972e-24	0.347581	0.847	0.697	1.92162e-19	6	Tnfrsf9
Prdx12	9.32631e-24	0.320045	0.88	0.784	1.95657e-19	6	Prdx1
Tbrg4	1.19896e-23	0.301182	0.268	0.13	2.51529e-19	6	Tbrg4
Strap	1.25275e-23	0.367199	0.584	0.421	2.62815e-19	6	Strap
Sult2b1	1.93113e-23	0.312942	0.136	0.045	4.05131e-19	6	Sult2b1
Eif3g	2.12293e-23	0.317113	0.467	0.292	4.45369e-19	6	Eif3g
Eif2s2	2.44562e-23	0.392525	0.466	0.309	5.13067e-19	6	Eif2s2
D030056L22Rik	2.71083e-23	0.332537	0.246	0.115	5.68706e-19	6	D030056L22Rik
1810032O08Rik	3.3165e-23	0.264099	0.192	0.078	6.95768e-19	6	1810032O08Rik
Rabggtb	3.56805e-23	0.351119	0.418	0.256	7.48542e-19	6	Rabggtb
Lsm71	4.02961e-23	0.395778	0.526	0.366	8.45372e-19	6	Lsm7
Npm3	6.01806e-23	0.377861	0.531	0.376	1.26253e-18	6	Npm3
Dkc11	6.16662e-23	0.334496	0.297	0.155	1.29369e-18	6	Dkc1
Taf1d	6.80874e-23	0.390406	0.46	0.301	1.42841e-18	6	Taf1d
Psme3	9.56769e-23	0.357891	0.387	0.23	2.00721e-18	6	Psme3
Shmt21	1.04806e-22	0.345325	0.289	0.15	2.19873e-18	6	Shmt2
Cd3eap	1.37428e-22	0.250935	0.187	0.076	2.88311e-18	6	Cd3eap
Pinx1	1.42527e-22	0.254761	0.201	0.085	2.99008e-18	6	Pinx1
Ece12	1.60443e-22	0.410937	0.505	0.339	3.36594e-18	6	Ece1
Sla1	2.0241e-22	0.553878	0.615	0.483	4.24637e-18	6	Sla
Ppid	2.8024e-22	0.292511	0.34	0.189	5.87917e-18	6	Ppid
Cebpz	3.07848e-22	0.337154	0.448	0.282	6.45835e-18	6	Cebpz
Eif1	3.29708e-22	0.251276	0.983	0.95	6.91695e-18	6	Eif1
Slc1a5	3.82866e-22	0.416487	0.531	0.376	8.03215e-18	6	Slc1a5
Abce1	4.76654e-22	0.32602	0.369	0.215	9.99973e-18	6	Abce1
Eif5b	4.97077e-22	0.345295	0.565	0.403	1.04282e-17	6	Eif5b
Timm23	7.56346e-22	0.351718	0.521	0.364	1.58674e-17	6	Timm23
Cacybp	8.81894e-22	0.376429	0.598	0.465	1.85012e-17	6	Cacybp
Rpl7l1	1.13945e-21	0.335105	0.371	0.222	2.39045e-17	6	Rpl7l1
Eef1g1	1.16306e-21	0.360191	0.675	0.575	2.43998e-17	6	Eef1g
Tnip3	1.16396e-21	0.334476	0.172	0.068	2.44188e-17	6	Tnip3
Ppif	1.59743e-21	0.268853	0.234	0.11	3.35126e-17	6	Ppif
Cdv3	1.64939e-21	0.358981	0.418	0.261	3.46026e-17	6	Cdv3
Jarid2	1.78732e-21	0.459898	0.447	0.291	3.74963e-17	6	Jarid2
Fubp1	1.92622e-21	0.385025	0.622	0.481	4.04101e-17	6	Fubp1
Pdia61	2.10061e-21	0.325358	0.682	0.53	4.40687e-17	6	Pdia6
Sytl3	2.2761e-21	0.309683	0.223	0.104	4.77503e-17	6	Sytl3
Hnrnpu2	4.05746e-21	0.300024	0.847	0.735	8.51215e-17	6	Hnrnpu
Gspt11	4.67703e-21	0.337867	0.505	0.343	9.81195e-17	6	Gspt1
Snrpa1	5.74046e-21	0.348231	0.455	0.298	1.20429e-16	6	Snrpa1
Znhit6	7.45322e-21	0.252852	0.246	0.119	1.56361e-16	6	Znhit6
Gtf2f2	9.32776e-21	0.324602	0.344	0.196	1.95687e-16	6	Gtf2f2
Cd83	1.02557e-20	0.339016	0.119	0.039	2.15154e-16	6	Cd83
Nars	1.04605e-20	0.331967	0.466	0.303	2.19451e-16	6	Nars
Pes1	1.08109e-20	0.330088	0.385	0.235	2.26801e-16	6	Pes1
Eif3a1	1.16156e-20	0.315031	0.718	0.574	2.43684e-16	6	Eif3a
Gas5	1.32642e-20	0.341795	0.753	0.623	2.78269e-16	6	Gas5
Surf2	1.51422e-20	0.265198	0.23	0.108	3.17669e-16	6	Surf2
Noc4l	2.16646e-20	0.328003	0.32	0.181	4.54502e-16	6	Noc4l
Ddx10	2.28969e-20	0.350426	0.399	0.245	4.80355e-16	6	Ddx10
Relb	2.31005e-20	0.363314	0.335	0.189	4.84624e-16	6	Relb
Nfkb11	2.42268e-20	0.417567	0.49	0.337	5.08253e-16	6	Nfkb1
Hivep3	2.47255e-20	0.26346	0.196	0.085	5.18717e-16	6	Hivep3
Atp5g11	2.65161e-20	0.344309	0.723	0.64	5.56282e-16	6	Atp5g1
Syncrip	2.67618e-20	0.346264	0.507	0.354	5.61437e-16	6	Syncrip
Eif3c	3.05028e-20	0.311791	0.771	0.658	6.39918e-16	6	Eif3c
Naa50	3.28313e-20	0.356727	0.454	0.304	6.88767e-16	6	Naa50
Spry12	4.08912e-20	0.291654	0.275	0.138	8.57857e-16	6	Spry1
Ruvbl2	5.59069e-20	0.26311	0.314	0.174	1.17287e-15	6	Ruvbl2
Mthfd11	7.47893e-20	0.254242	0.232	0.113	1.56901e-15	6	Mthfd1
Eif6	8.50442e-20	0.27718	0.541	0.38	1.78414e-15	6	Eif6
Nop10	1.16749e-19	0.37315	0.694	0.593	2.44927e-15	6	Nop10
Impdh22	1.52245e-19	0.336021	0.44	0.288	3.19394e-15	6	Impdh2
Esf1	1.73697e-19	0.280145	0.323	0.181	3.64398e-15	6	Esf1
Ddx18	2.15303e-19	0.267019	0.301	0.165	4.51684e-15	6	Ddx18
Fkbp4	2.27485e-19	0.311869	0.483	0.332	4.77241e-15	6	Fkbp4
Bcl2a1d1	2.30244e-19	0.402677	0.591	0.456	4.83029e-15	6	Bcl2a1d
Slamf1	3.32764e-19	0.370557	0.381	0.232	6.98106e-15	6	Slamf1
2410002F23Rik	6.32264e-19	0.279885	0.225	0.11	1.32643e-14	6	2410002F23Rik
Wdr18	1.16043e-18	0.260464	0.285	0.156	2.43447e-14	6	Wdr18
Irf82	1.27105e-18	0.434471	0.589	0.446	2.66653e-14	6	Irf8
Rps19bp1	1.33379e-18	0.308159	0.27	0.146	2.79816e-14	6	Rps19bp1
Bzw1	1.34888e-18	0.282837	0.753	0.637	2.82981e-14	6	Bzw1
Tespa11	1.59829e-18	0.294523	0.256	0.129	3.35305e-14	6	Tespa1
Banf12	2.33143e-18	0.359709	0.629	0.511	4.89111e-14	6	Banf1
Slc7a5	2.77783e-18	0.310036	0.258	0.137	5.82761e-14	6	Slc7a5
Eif1a	3.242e-18	0.309254	0.405	0.268	6.80139e-14	6	Eif1a
Rpl22l1	4.23224e-18	0.299904	0.909	0.809	8.87883e-14	6	Rpl22l1
Farsb	4.6451e-18	0.274633	0.347	0.209	9.74495e-14	6	Farsb
Plcxd2	4.7663e-18	0.250118	0.132	0.05	9.99922e-14	6	Plcxd2
Psma3	5.84525e-18	0.297167	0.677	0.57	1.22627e-13	6	Psma3
Crabp21	7.59531e-18	0.651943	0.191	0.088	1.59342e-13	6	Crabp2
Snrpb2	9.11497e-18	0.30823	0.739	0.617	1.91223e-13	6	Snrpb
Nop14	1.06916e-17	0.262717	0.292	0.161	2.24299e-13	6	Nop14
Twistnb	1.07295e-17	0.289851	0.345	0.21	2.25095e-13	6	Twistnb
Mdh21	1.08849e-17	0.272869	0.759	0.661	2.28354e-13	6	Mdh2
Eif3b1	1.35728e-17	0.331541	0.469	0.332	2.84744e-13	6	Eif3b
Uqcrq	1.54919e-17	0.282388	0.785	0.714	3.25005e-13	6	Uqcrq
Cct4	1.98759e-17	0.298253	0.595	0.467	4.16976e-13	6	Cct4
Stat5a	2.31595e-17	0.260484	0.225	0.112	4.85863e-13	6	Stat5a
Imp4	3.42077e-17	0.264446	0.316	0.186	7.17642e-13	6	Imp4
Sft2d1	4.05289e-17	0.28208	0.352	0.218	8.50256e-13	6	Sft2d1
Rrp1b	5.11338e-17	0.326047	0.287	0.165	1.07274e-12	6	Rrp1b
Ddx391	6.11454e-17	0.309919	0.512	0.368	1.28277e-12	6	Ddx39
Slc3a2	9.95073e-17	0.357173	0.533	0.395	2.08756e-12	6	Slc3a2
Mat2a	1.40189e-16	0.294006	0.404	0.266	2.94102e-12	6	Mat2a
Tnfsf9	1.54813e-16	0.527238	0.198	0.098	3.24782e-12	6	Tnfsf9
Clpp	1.56007e-16	0.268537	0.263	0.144	3.27288e-12	6	Clpp
Tfrc1	1.90108e-16	0.336788	0.308	0.185	3.98828e-12	6	Tfrc
U2af12	2.28157e-16	0.282143	0.557	0.417	4.78651e-12	6	U2af1
Vsir1	3.65777e-16	0.341085	0.51	0.376	7.67363e-12	6	Vsir
Mrpl20	3.66957e-16	0.297441	0.529	0.396	7.69839e-12	6	Mrpl20
Tomm70a	4.14862e-16	0.321499	0.414	0.285	8.7034e-12	6	Tomm70a
Snhg12	4.38104e-16	0.282167	0.227	0.119	9.19099e-12	6	Snhg12
Serpinb91	4.61956e-16	0.530641	0.567	0.45	9.69138e-12	6	Serpinb9
Umps	6.36152e-16	0.253235	0.273	0.156	1.33458e-11	6	Umps
Utp18	6.37342e-16	0.288258	0.261	0.145	1.33708e-11	6	Utp18
Polr1d	7.18026e-16	0.278891	0.749	0.65	1.50635e-11	6	Polr1d
Bcl2a1b1	7.57811e-16	0.344871	0.57	0.442	1.58981e-11	6	Bcl2a1b
Eif3j1	8.91164e-16	0.298523	0.4	0.269	1.86957e-11	6	Eif3j1
Bccip	1.65563e-15	0.283562	0.473	0.341	3.47334e-11	6	Bccip
Nr4a21	1.8767e-15	0.537602	0.545	0.422	3.93712e-11	6	Nr4a2
Ivns1abp	1.95237e-15	0.292181	0.368	0.24	4.09587e-11	6	Ivns1abp
Snhg3	2.38066e-15	0.323172	0.375	0.252	4.99439e-11	6	Snhg3
Alcam2	2.96847e-15	0.360505	0.454	0.325	6.22755e-11	6	Alcam
Csrnp1	2.98971e-15	0.300485	0.321	0.195	6.27211e-11	6	Csrnp1
Plk3	3.14477e-15	0.346478	0.311	0.187	6.5974e-11	6	Plk3
Nfkbia	3.14815e-15	0.525081	0.62	0.496	6.6045e-11	6	Nfkbia
Slc41a1	3.23241e-15	0.253184	0.119	0.046	6.78128e-11	6	Slc41a1
Rpf2	3.56579e-15	0.256052	0.218	0.117	7.48066e-11	6	Rpf2
Jaml	6.73721e-15	0.467137	0.565	0.464	1.4134e-10	6	Jaml
Stip1	7.68084e-15	0.28567	0.478	0.346	1.61136e-10	6	Stip1
Irf41	7.9179e-15	0.301058	0.376	0.242	1.6611e-10	6	Irf4
Timm13	9.46215e-15	0.2528	0.6	0.475	1.98507e-10	6	Timm13
Casp4	9.81877e-15	0.281832	0.198	0.1	2.05988e-10	6	Casp4
Eif3d	1.03621e-14	0.269229	0.565	0.436	2.17387e-10	6	Eif3d
Orai11	1.20872e-14	0.302683	0.471	0.325	2.53577e-10	6	Orai1
Dusp52	1.49478e-14	0.283571	0.478	0.336	3.1359e-10	6	Dusp5
Txn2	1.52224e-14	0.285683	0.598	0.501	3.19351e-10	6	Txn2
Snrpa	1.78276e-14	0.309854	0.407	0.289	3.74005e-10	6	Snrpa
Serpinb6b1	1.90099e-14	0.56628	0.505	0.405	3.9881e-10	6	Serpinb6b
Cfdp1	3.74198e-14	0.263653	0.442	0.315	7.85029e-10	6	Cfdp1
Bzw2	7.53628e-14	0.276026	0.337	0.216	1.58104e-09	6	Bzw2
Rbm28	9.01984e-14	0.275815	0.352	0.233	1.89227e-09	6	Rbm28
Pdap1	9.02095e-14	0.28342	0.538	0.425	1.89251e-09	6	Pdap1
Rsl24d1	1.72013e-13	0.256531	0.294	0.185	3.60866e-09	6	Rsl24d1
Nifk	2.46108e-13	0.272691	0.225	0.127	5.16309e-09	6	Nifk
Rbbp72	2.77861e-13	0.253482	0.625	0.484	5.82925e-09	6	Rbbp7
Arl5b	3.40479e-13	0.266136	0.223	0.124	7.1429e-09	6	Arl5b
Mtap	3.42666e-13	0.267382	0.285	0.175	7.18879e-09	6	Mtap
Nutf22	5.49308e-13	0.261197	0.476	0.355	1.15239e-08	6	Nutf2
Lilr4b	8.18798e-13	0.399173	0.146	0.069	1.71776e-08	6	Lilr4b
Gna13	8.95663e-13	0.254131	0.464	0.331	1.87901e-08	6	Gna13
Bcl2l1	9.24545e-13	0.262599	0.206	0.114	1.9396e-08	6	Bcl2l1
Denr	1.32884e-12	0.25111	0.526	0.414	2.78776e-08	6	Denr
Dnaja2	1.37902e-12	0.255408	0.6	0.491	2.89304e-08	6	Dnaja2
Cd21	1.71968e-12	0.279401	0.732	0.664	3.60772e-08	6	Cd2
G3bp12	1.72253e-12	0.287676	0.534	0.424	3.61369e-08	6	G3bp1
Mrpl17	2.40716e-12	0.259248	0.407	0.291	5.04999e-08	6	Mrpl17
Ssb	4.53286e-12	0.266332	0.658	0.559	9.50948e-08	6	Ssb
Ppat1	4.89124e-12	0.25618	0.259	0.161	1.02613e-07	6	Ppat
Mrpl15	6.59607e-12	0.257021	0.402	0.292	1.38379e-07	6	Mrpl15
Tnfsf111	9.6973e-12	0.429692	0.27	0.17	2.0344e-07	6	Tnfsf11
Pop5	6.04933e-11	0.284034	0.44	0.336	1.26909e-06	6	Pop5
Larp1	1.06777e-10	0.263163	0.266	0.173	2.24007e-06	6	Larp1
Plek1	3.05619e-10	0.329121	0.529	0.444	6.41157e-06	6	Plek
Tcerg1	5.16916e-10	0.253503	0.426	0.322	1.08444e-05	6	Tcerg1
Rheb	7.57861e-10	0.276876	0.46	0.366	1.58992e-05	6	Rheb
Slc29a11	8.61032e-10	0.25023	0.34	0.243	1.80636e-05	6	Slc29a1
Sf3b3	8.80346e-10	0.25164	0.383	0.282	1.84688e-05	6	Sf3b3
Ramp31	1.17818e-09	0.262097	0.149	0.079	2.47171e-05	6	Ramp3
Gm26825	4.45472e-09	0.259797	0.613	0.512	9.34555e-05	6	Gm26825
Ier31	5.23719e-08	0.285877	0.383	0.288	0.00109871	6	Ier3
Traf1	1.29965e-07	0.330823	0.515	0.44	0.00272654	6	Traf1
Icam1	2.53512e-06	0.33852	0.28	0.21	0.0531843	6	Icam1
Cd691	3.9601e-06	0.304552	0.426	0.356	0.083079	6	Cd69
Zfp36l11	1.19973e-05	0.306217	0.739	0.686	0.251692	6	Zfp36l1
Tnfrsf41	0.0028064	0.406748	0.366	0.335	1	6	Tnfrsf4
Isg15	0	2.40757	0.907	0.16	0	7	Isg15
Ifit3	0	2.02771	0.725	0.04	0	7	Ifit3
Ifit1	0	1.90527	0.683	0.041	0	7	Ifit1
Usp18	0	1.55667	0.604	0.066	0	7	Usp18
Ifit3b	0	1.41407	0.434	0.014	0	7	Ifit3b
Rsad2	0	1.06435	0.238	0.005	0	7	Rsad2
Mx2	0	0.987673	0.343	0.011	0	7	Mx2
Cmpk2	0	0.956342	0.315	0.013	0	7	Cmpk2
Rtp41	6.03924e-269	1.39121	0.73	0.135	1.26697e-264	7	Rtp4
Ifi2081	1.56084e-256	1.55579	0.804	0.191	3.27449e-252	7	Ifi208
Slfn5	1.43116e-255	1.44451	0.517	0.067	3.00244e-251	7	Slfn5
Mx1	1.31409e-250	1.39597	0.457	0.052	2.75684e-246	7	Mx1
Irf71	3.25821e-242	1.51181	0.809	0.207	6.8354e-238	7	Irf7
Ifi2141	1.93035e-213	1.42361	0.662	0.144	4.04968e-209	7	Ifi214
Ifit1bl1	4.39987e-188	0.664307	0.203	0.01	9.2305e-184	7	Ifit1bl1
AC151730.3	8.21497e-183	0.603017	0.212	0.012	1.72342e-178	7	AC151730.3
Ifi2031	3.28094e-179	1.47933	0.925	0.538	6.88308e-175	7	Ifi203
Ifi202b	1.10164e-170	0.879687	0.252	0.021	2.31113e-166	7	Ifi202b
Phf11c	2.79626e-170	0.819964	0.336	0.039	5.86627e-166	7	Phf11c
Oas3	5.61573e-167	0.937599	0.382	0.053	1.17812e-162	7	Oas3
Slfn11	1.3423e-163	1.35651	0.781	0.291	2.81601e-159	7	Slfn1
Gm38050	4.2991e-157	0.576896	0.154	0.007	9.01908e-153	7	Gm38050
Ifit2	2.59542e-153	1.10291	0.347	0.049	5.44493e-149	7	Ifit2
Sell	7.3515e-147	1.18599	0.329	0.044	1.54227e-142	7	Sell
Ifi2091	1.00262e-141	1.22181	0.587	0.162	2.1034e-137	7	Ifi209
Ifi44	1.18188e-138	0.80272	0.142	0.007	2.47946e-134	7	Ifi44
Trim30a	1.68246e-137	1.20799	0.676	0.237	3.52963e-133	7	Trim30a
Zbp11	2.95246e-136	1.29869	0.767	0.342	6.19397e-132	7	Zbp1
Samhd11	1.00902e-134	1.45814	0.8	0.398	2.11683e-130	7	Samhd1
Isg201	5.54933e-126	1.52615	0.634	0.23	1.16419e-121	7	Isg20
AC151730.1	1.77944e-125	0.390448	0.124	0.005	3.73309e-121	7	AC151730.1
Gbp21	9.92141e-122	1.39015	0.697	0.283	2.08141e-117	7	Gbp2
Herc6	2.86257e-119	1.19713	0.557	0.173	6.00538e-115	7	Herc6
Sp1001	9.46504e-116	0.927296	0.932	0.727	1.98567e-111	7	Sp100
Gbp9	2.89496e-113	1.17426	0.648	0.253	6.07334e-109	7	Gbp9
Samd9l1	4.36349e-112	1.11175	0.704	0.305	9.15418e-108	7	Samd9l
Ddx58	7.00214e-109	1.05751	0.608	0.223	1.46898e-104	7	Ddx58
Bst21	3.01622e-108	1.32903	0.695	0.315	6.32772e-104	7	Bst2
Nsg2	9.29878e-105	0.61622	0.198	0.021	1.95079e-100	7	Nsg2
Stat1	1.59245e-103	0.997487	0.928	0.708	3.34081e-99	7	Stat1
Iigp1	1.92448e-99	0.863967	0.247	0.036	4.03738e-95	7	Iigp1
Ifih1	1.32078e-98	1.0552	0.429	0.113	2.77087e-94	7	Ifih1
Xaf11	6.98926e-98	1.00404	0.611	0.237	1.46628e-93	7	Xaf1
Gbp41	2.09142e-93	1.04536	0.793	0.482	4.38758e-89	7	Gbp4
Ifi27l2a1	8.3634e-92	1.23237	0.874	0.6	1.75456e-87	7	Ifi27l2a
Ifi471	2.13376e-91	1.06415	0.795	0.503	4.47641e-87	7	Ifi47
Slfn8	3.79751e-90	0.972183	0.506	0.17	7.9668e-86	7	Slfn8
Ddx60	6.73651e-87	0.659377	0.233	0.036	1.41325e-82	7	Ddx60
Phf11b	1.55884e-86	1.28061	0.66	0.342	3.27028e-82	7	Phf11b
Treml2	3.17171e-85	0.451512	0.126	0.01	6.65393e-81	7	Treml2
Mndal1	4.3109e-83	1.0468	0.683	0.358	9.04384e-79	7	Mndal
Lgals91	9.25261e-80	1.0051	0.676	0.375	1.94111e-75	7	Lgals9
Daxx	5.43648e-75	0.924787	0.476	0.173	1.14052e-70	7	Daxx
Cxcl10	7.8809e-75	1.0156	0.112	0.009	1.65333e-70	7	Cxcl10
Shisa5	3.65492e-74	0.588482	0.979	0.924	7.66767e-70	7	Shisa5
Gm122501	3.97013e-74	0.753404	0.333	0.084	8.32894e-70	7	Gm12250
Tmsb10	2.22603e-73	0.472988	1	0.999	4.67e-69	7	Tmsb10
Rnf213	2.58344e-73	1.02091	0.452	0.161	5.4198e-69	7	Rnf213
Phf11a	1.77844e-72	0.691387	0.249	0.05	3.73099e-68	7	Phf11a
Dhx58	4.38848e-72	0.580789	0.238	0.045	9.20659e-68	7	Dhx58
Parp12	1.95343e-66	0.405541	0.142	0.017	4.09809e-62	7	Parp12
Igtp1	4.16506e-65	0.929604	0.648	0.353	8.73788e-61	7	Igtp
Ms4a4b1	6.21849e-65	0.57967	0.974	0.975	1.30458e-60	7	Ms4a4b
BC147527	3.30441e-64	0.519864	0.177	0.028	6.93233e-60	7	BC147527
Ms4a6b1	4.0436e-64	0.537761	0.963	0.912	8.48307e-60	7	Ms4a6b
Ly6c21	8.43254e-64	1.04267	0.688	0.364	1.76906e-59	7	Ly6c2
Trafd1	5.37472e-61	0.864694	0.436	0.17	1.12756e-56	7	Trafd1
Gm89951	1.30823e-58	0.80397	0.779	0.584	2.74453e-54	7	Gm8995
Tcf71	1.15486e-57	0.661136	0.294	0.077	2.42277e-53	7	Tcf7
Tgtp21	1.3095e-57	0.852678	0.524	0.239	2.7472e-53	7	Tgtp2
Ifi206	1.84101e-57	0.416994	0.14	0.019	3.86225e-53	7	Ifi206
Parp9	1.15013e-55	0.745126	0.448	0.185	2.41287e-51	7	Parp9
Gbp7	2.86773e-55	0.910256	0.66	0.438	6.0162e-51	7	Gbp7
Rps271	6.62813e-55	0.402018	0.993	0.998	1.39052e-50	7	Rps27
Parp14	7.857e-54	0.896815	0.476	0.223	1.64832e-49	7	Parp14
Oas1a	2.37516e-53	0.569499	0.189	0.038	4.98285e-49	7	Oas1a
Irgm11	2.81399e-53	0.840775	0.476	0.209	5.90347e-49	7	Irgm1
Epsti11	7.20509e-52	0.829049	0.678	0.462	1.51156e-47	7	Epsti1
Slfn21	6.33362e-51	0.720707	0.797	0.64	1.32873e-46	7	Slfn2
Psme1	4.83018e-50	0.512097	0.907	0.877	1.01332e-45	7	Psme1
Stat2	2.32637e-49	0.641793	0.298	0.094	4.8805e-45	7	Stat2
Gbp2b	4.24011e-49	0.514397	0.191	0.041	8.89532e-45	7	Gbp2b
AW011738	6.95452e-48	0.304385	0.119	0.017	1.45899e-43	7	AW011738
Ly6a1	2.14502e-47	1.13983	0.618	0.35	4.50003e-43	7	Ly6a
Tgtp1	6.50404e-47	0.401105	0.117	0.017	1.36448e-42	7	Tgtp1
Sp110	7.47308e-46	0.735423	0.66	0.454	1.56778e-41	7	Sp110
Pml	9.94833e-46	0.774794	0.394	0.167	2.08706e-41	7	Pml
Eif2ak2	5.71241e-45	0.579613	0.238	0.067	1.19841e-40	7	Eif2ak2
H2-T231	5.67619e-44	0.538817	0.914	0.863	1.19081e-39	7	H2-T23
Tapbp	3.15642e-43	0.686781	0.725	0.592	6.62186e-39	7	Tapbp
H2-T24	1.76925e-41	0.454679	0.177	0.041	3.71172e-37	7	H2-T24
Psmb10	1.74339e-40	0.703568	0.669	0.492	3.65745e-36	7	Psmb10
Selenow1	4.26304e-39	0.52611	0.874	0.822	8.94343e-35	7	Selenow
Rps24	1.44551e-38	0.304922	0.995	0.999	3.03253e-34	7	Rps24
Dtx3l	1.6616e-38	0.68422	0.387	0.176	3.48587e-34	7	Dtx3l
Mov10	4.50861e-38	0.55553	0.233	0.072	9.45861e-34	7	Mov10
Ifi211	3.11808e-36	0.425432	0.135	0.028	6.54141e-32	7	Ifi211
Parp10	5.10775e-36	0.593861	0.266	0.094	1.07156e-31	7	Parp10
Tor3a	6.63685e-35	0.689867	0.242	0.083	1.39235e-30	7	Tor3a
Ifi35	8.81488e-34	0.703975	0.457	0.264	1.84927e-29	7	Ifi35
Klf21	1.54567e-32	0.458966	0.357	0.148	3.24267e-28	7	Klf2
Rps211	5.95772e-31	0.254099	0.995	0.996	1.24987e-26	7	Rps21
Rplp1	1.09991e-30	0.361474	0.991	0.994	2.30751e-26	7	Rplp1
1600014C10Rik	8.04661e-30	0.650661	0.38	0.196	1.6881e-25	7	1600014C10Rik
Sidt11	6.28986e-29	0.64026	0.333	0.156	1.31955e-24	7	Sidt1
Malat11	8.18421e-29	0.327039	0.998	0.998	1.71696e-24	7	Malat1
Itm2b1	3.95697e-28	0.375959	0.942	0.923	8.30133e-24	7	Itm2b
Fchsd2	7.97784e-28	0.467234	0.219	0.078	1.67367e-23	7	Fchsd2
Ctss	1.36986e-27	0.634995	0.427	0.246	2.87384e-23	7	Ctss
Rps29	2.64972e-27	0.300591	0.988	0.996	5.55885e-23	7	Rps29
Lgals3bp1	2.29686e-26	0.714129	0.471	0.309	4.81859e-22	7	Lgals3bp
S1pr11	4.13166e-26	0.365314	0.198	0.065	8.66781e-22	7	S1pr1
Trim14	7.79197e-26	0.457251	0.189	0.064	1.63468e-21	7	Trim14
Etnk1	8.43216e-26	0.584455	0.382	0.214	1.76898e-21	7	Etnk1
Mitd1	3.66992e-25	0.561233	0.378	0.209	7.69913e-21	7	Mitd1
Uba7	3.7403e-25	0.472545	0.256	0.107	7.84677e-21	7	Uba7
Ms4a4c1	7.62409e-25	0.646801	0.382	0.205	1.59946e-20	7	Ms4a4c
Trim21	1.64422e-24	0.456434	0.224	0.087	3.44941e-20	7	Trim21
H2-T22	1.88682e-24	0.598613	0.669	0.593	3.95836e-20	7	H2-T22
Emb1	2.37003e-24	0.514469	0.506	0.313	4.97208e-20	7	Emb
Nmi	7.77735e-24	0.626189	0.471	0.316	1.63161e-19	7	Nmi
Socs1	1.21086e-23	0.714607	0.471	0.314	2.54026e-19	7	Socs1
Cmah1	1.47654e-23	0.414371	0.159	0.049	3.09762e-19	7	Cmah
Helz2	2.16218e-23	0.515815	0.238	0.1	4.53605e-19	7	Helz2
9930111J21Rik2	2.16812e-23	0.539903	0.308	0.151	4.54851e-19	7	9930111J21Rik2
Itgb71	2.83439e-23	0.558617	0.394	0.217	5.94627e-19	7	Itgb7
Gbp8	4.24653e-23	0.643227	0.347	0.19	8.90879e-19	7	Gbp8
Mxd11	1.45558e-22	0.637567	0.317	0.16	3.05365e-18	7	Mxd1
Oas1b	2.7858e-22	0.271913	0.103	0.025	5.84432e-18	7	Oas1b
Ly6c11	3.12758e-22	0.571178	0.315	0.154	6.56135e-18	7	Ly6c1
Trim34a	8.77524e-22	0.345658	0.156	0.052	1.84096e-17	7	Trim34a
Psmb8	1.89625e-21	0.31143	0.928	0.907	3.97814e-17	7	Psmb8
Cnp	7.05057e-21	0.594719	0.471	0.338	1.47914e-16	7	Cnp
Gbp10	2.72239e-20	0.539167	0.301	0.157	5.71131e-16	7	Gbp10
Dapl1	3.17304e-20	0.462517	0.161	0.055	6.65672e-16	7	Dapl1
Smchd11	2.08065e-19	0.637565	0.471	0.346	4.365e-15	7	Smchd1
Lef11	3.69346e-19	0.62688	0.296	0.156	7.74852e-15	7	Lef1
Klf31	4.38625e-19	0.415084	0.189	0.073	9.2019e-15	7	Klf3
Cxcr31	6.09809e-19	0.470474	0.331	0.174	1.27932e-14	7	Cxcr3
Ripor21	7.30782e-19	0.517731	0.303	0.159	1.53311e-14	7	Ripor2
AC125206.2	1.00241e-18	0.345587	0.14	0.047	2.10295e-14	7	AC125206.2
Scml4	1.39113e-18	0.370874	0.175	0.067	2.91844e-14	7	Scml4
Ighm	3.37905e-18	0.286755	0.128	0.042	7.0889e-14	7	Ighm
Npc21	3.44373e-18	0.462397	0.704	0.701	7.2246e-14	7	Npc2
Rpl12	4.70139e-18	0.300082	0.944	0.944	9.86305e-14	7	Rpl12
Tspo	5.19765e-18	0.389823	0.79	0.788	1.09041e-13	7	Tspo
Kbtbd11	5.43506e-18	0.436639	0.193	0.082	1.14022e-13	7	Kbtbd11
Ddx24	8.49515e-18	0.477411	0.632	0.581	1.7822e-13	7	Ddx24
Evl	4.21171e-17	0.486637	0.536	0.429	8.83575e-13	7	Evl
Hsh2d	5.21636e-17	0.26868	0.126	0.042	1.09434e-12	7	Hsh2d
Znfx1	8.46975e-17	0.421294	0.179	0.076	1.77687e-12	7	Znfx1
Trim12c	2.60824e-16	0.502726	0.329	0.199	5.47182e-12	7	Trim12c
Irf2	3.16636e-16	0.476865	0.515	0.411	6.64271e-12	7	Irf2
Fam26f	3.40023e-16	0.416137	0.205	0.094	7.13333e-12	7	Fam26f
Cd692	3.5104e-16	0.618962	0.485	0.354	7.36448e-12	7	Cd69
Psme21	8.09126e-16	0.313661	0.816	0.817	1.69746e-11	7	Psme2
Ube2l6	1.77991e-15	0.54853	0.221	0.11	3.73408e-11	7	Ube2l6
Limd2	2.32479e-15	0.380502	0.723	0.702	4.87717e-11	7	Limd2
Asb13	5.75009e-15	0.378497	0.168	0.073	1.20631e-10	7	Asb13
Cd274	1.28287e-14	0.598868	0.373	0.254	2.69134e-10	7	Cd274
Trim25	1.32322e-14	0.494137	0.233	0.124	2.77598e-10	7	Trim25
Rapgef6	2.70101e-14	0.477511	0.564	0.494	5.66644e-10	7	Rapgef6
Gbp5	3.51691e-14	0.571796	0.24	0.13	7.37812e-10	7	Gbp5
Herc3	3.66173e-14	0.313445	0.135	0.053	7.68195e-10	7	Herc3
Gm47591	4.01223e-14	0.500752	0.38	0.261	8.41725e-10	7	Gm4759
Arl4c1	9.66096e-14	0.447779	0.298	0.179	2.02677e-09	7	Arl4c
H2-Q4	1.32529e-13	0.302968	0.783	0.773	2.78032e-09	7	H2-Q4
Zc3hav11	1.41002e-13	0.408115	0.55	0.478	2.95807e-09	7	Zc3hav1
Irgm2	1.92377e-13	0.358256	0.142	0.059	4.03588e-09	7	Irgm2
Cd71	1.99374e-13	0.428219	0.205	0.1	4.18267e-09	7	Cd7
Nsd31	2.09339e-13	0.383467	0.594	0.546	4.39172e-09	7	Nsd3
Arhgap451	2.93105e-13	0.315439	0.702	0.671	6.14905e-09	7	Arhgap45
Slamf61	4.82305e-13	0.346464	0.261	0.144	1.01183e-08	7	Slamf6
Ablim11	5.4201e-13	0.375862	0.618	0.574	1.13708e-08	7	Ablim1
Mrpl30	2.21278e-12	0.482589	0.522	0.457	4.64219e-08	7	Mrpl30
Rnf114	2.43829e-12	0.459914	0.462	0.384	5.11528e-08	7	Rnf114
2810474O19Rik	3.67015e-12	0.483668	0.382	0.276	7.6996e-08	7	2810474O19Rik
A530040E14Rik	6.5509e-12	0.348951	0.145	0.065	1.37431e-07	7	A530040E14Rik
Socs31	7.65606e-12	0.375935	0.179	0.088	1.60616e-07	7	Socs3
Ly91	8.42086e-12	0.330511	0.207	0.108	1.76661e-07	7	Ly9
Setdb2	8.95381e-12	0.413078	0.198	0.106	1.87842e-07	7	Setdb2
Ccnd21	1.28489e-11	0.354236	0.594	0.515	2.69557e-07	7	Ccnd2
Rgs10	1.39205e-11	0.34504	0.24	0.136	2.92037e-07	7	Rgs10
Ssh2	1.88442e-11	0.355753	0.2	0.107	3.95333e-07	7	Ssh2
Tnfsf8	2.47005e-11	0.379945	0.145	0.065	5.18192e-07	7	Tnfsf8
Sfi1	3.13023e-11	0.411109	0.627	0.599	6.56691e-07	7	Sfi1
Morc3	3.30325e-11	0.448893	0.305	0.204	6.92989e-07	7	Morc3
Clec2d1	3.57928e-11	0.332673	0.571	0.492	7.50896e-07	7	Clec2d
Irf11	4.45036e-11	0.487197	0.49	0.405	9.33641e-07	7	Irf1
Dpp4	5.35764e-11	0.482804	0.287	0.19	1.12398e-06	7	Dpp4
Dgka1	7.48151e-11	0.459055	0.476	0.396	1.56955e-06	7	Dgka
Nod1	8.60032e-11	0.257632	0.128	0.055	1.80426e-06	7	Nod1
Ifngr11	9.6989e-11	0.306704	0.718	0.705	2.03473e-06	7	Ifngr1
Adar	1.20659e-10	0.402606	0.245	0.149	2.53131e-06	7	Adar
Trim26	1.45239e-10	0.345873	0.242	0.145	3.04697e-06	7	Trim26
Ehd3	2.39322e-10	0.389424	0.259	0.164	5.02074e-06	7	Ehd3
Rasa31	3.75971e-10	0.367276	0.249	0.151	7.88749e-06	7	Rasa3
Gimap61	3.78514e-10	0.366841	0.592	0.547	7.94084e-06	7	Gimap6
Chmp4b	4.15079e-10	0.476502	0.522	0.491	8.70794e-06	7	Chmp4b
Slco3a1	1.22879e-09	0.281265	0.128	0.059	2.57787e-05	7	Slco3a1
Tor1aip2	1.70839e-09	0.442987	0.305	0.221	3.58403e-05	7	Tor1aip2
Elf1	1.83505e-09	0.355436	0.613	0.603	3.84975e-05	7	Elf1
Ikbke	4.76402e-09	0.256938	0.121	0.056	9.99444e-05	7	Ikbke
Trp53inp11	7.2158e-09	0.271673	0.191	0.108	0.00015138	7	Trp53inp1
Ppp1r12a1	9.02955e-09	0.381579	0.548	0.525	0.000189431	7	Ppp1r12a
Aldh7a1	1.07422e-08	0.277119	0.103	0.045	0.000225361	7	Aldh7a1
Ralgps2	1.38518e-08	0.255249	0.105	0.046	0.000290598	7	Ralgps2
Zcchc111	1.72094e-08	0.42594	0.396	0.321	0.000361036	7	Zcchc11
Trim56	2.35568e-08	0.347243	0.205	0.126	0.000494198	7	Trim56
Vcpip1	2.93966e-08	0.36425	0.242	0.161	0.000616712	7	Vcpip1
Cd86	2.98622e-08	0.305802	0.133	0.067	0.000626479	7	Cd86
Zufsp	3.03589e-08	0.346664	0.17	0.097	0.0006369	7	Zufsp
Gramd31	3.1248e-08	0.364969	0.319	0.23	0.000655552	7	Gramd3
Txnip1	3.32635e-08	0.288495	0.499	0.435	0.000697835	7	Txnip
Ascc3	5.16595e-08	0.419278	0.352	0.28	0.00108376	7	Ascc3
Tbc1d1	7.20289e-08	0.350469	0.266	0.186	0.00151109	7	Tbc1d1
Tap2	8.20685e-08	0.301701	0.578	0.581	0.00172171	7	Tap2
Slc25a22	9.18567e-08	0.259929	0.159	0.089	0.00192706	7	Slc25a22
Foxp1	1.39067e-07	0.418601	0.31	0.232	0.00291749	7	Foxp1
Ppm1k	2.40305e-07	0.264707	0.14	0.077	0.00504136	7	Ppm1k
Actn1	2.58657e-07	0.373153	0.184	0.113	0.00542636	7	Actn1
Fyb1	3.17303e-07	0.281798	0.65	0.672	0.00665671	7	Fyb
Iqgap2	3.65597e-07	0.315317	0.189	0.118	0.00766987	7	Iqgap2
Ogfr	3.68636e-07	0.40096	0.31	0.243	0.00773361	7	Ogfr
Tor1aip1	4.84589e-07	0.481493	0.366	0.314	0.0101662	7	Tor1aip1
Ccrl2	5.35467e-07	0.408872	0.142	0.081	0.0112336	7	Ccrl2
Fam111a1	5.8746e-07	0.324517	0.196	0.128	0.0123243	7	Fam111a
Fam102a	1.05224e-06	0.359813	0.305	0.236	0.0220749	7	Fam102a
Naa20	1.14336e-06	0.398162	0.331	0.277	0.0239865	7	Naa20
Znrf1	1.62817e-06	0.265602	0.142	0.083	0.0341574	7	Znrf1
Pdlim1	2.05957e-06	0.300283	0.147	0.087	0.0432077	7	Pdlim1
Cd4	2.34201e-06	0.352457	0.105	0.054	0.049133	7	Cd4
Il7r1	2.61991e-06	0.400891	0.566	0.54	0.054963	7	Il7r
Acp51	3.11465e-06	0.338695	0.226	0.158	0.0653423	7	Acp5
Prkcq	3.50335e-06	0.316909	0.483	0.47	0.0734969	7	Prkcq
Sh3bp5	4.35582e-06	0.287317	0.161	0.099	0.0913808	7	Sh3bp5
Itk1	4.90068e-06	0.258012	0.674	0.706	0.102811	7	Itk
Tapbpl	6.18258e-06	0.348386	0.352	0.296	0.129704	7	Tapbpl
Gbp3	7.68754e-06	0.414998	0.254	0.196	0.161277	7	Gbp3
Phyh	8.546e-06	0.357804	0.357	0.313	0.179286	7	Phyh
Cpne31	9.43751e-06	0.311402	0.235	0.17	0.19799	7	Cpne3
A930005H10Rik	1.03135e-05	0.255289	0.126	0.073	0.216367	7	A930005H10Rik
Ankfy1	1.32332e-05	0.299933	0.189	0.13	0.277619	7	Ankfy1
Arhgap261	1.43637e-05	0.294821	0.203	0.139	0.301336	7	Arhgap26
Casp8	1.44441e-05	0.396169	0.326	0.283	0.303022	7	Casp8
H2-T10	1.53617e-05	0.339204	0.261	0.201	0.322272	7	H2-T10
mt-Rnr11	1.65369e-05	0.265014	0.83	0.857	0.346929	7	mt-Rnr1
Xrn21	1.85404e-05	0.279534	0.517	0.514	0.38896	7	Xrn2
Irf91	3.18972e-05	0.315699	0.275	0.217	0.669172	7	Irf9
Idnk	3.3193e-05	0.3055	0.361	0.322	0.696356	7	Idnk
N4bp1	3.4036e-05	0.297778	0.182	0.126	0.71404	7	N4bp1
Ncoa7	3.94431e-05	0.37121	0.273	0.221	0.827476	7	Ncoa7
Tpst21	4.783e-05	0.27273	0.364	0.314	1	7	Tpst2
Mbp1	5.3956e-05	0.251325	0.219	0.158	1	7	Mbp
Ipcef1	5.68928e-05	0.29985	0.224	0.169	1	7	Ipcef1
Fam78a	0.000132601	0.290814	0.21	0.156	1	7	Fam78a
Stk381	0.000193056	0.303494	0.301	0.253	1	7	Stk38
Tap1	0.00019322	0.277571	0.564	0.599	1	7	Tap1
Stk4	0.000244237	0.294056	0.443	0.432	1	7	Stk4
Mycbp2	0.000297009	0.373093	0.438	0.435	1	7	Mycbp2
Saraf1	0.000509458	0.283729	0.508	0.524	1	7	Saraf
Sp1401	0.000624422	0.282234	0.517	0.522	1	7	Sp140
Fam208b	0.000692236	0.282146	0.184	0.139	1	7	Fam208b
Sipa1l1	0.00075755	0.296135	0.182	0.14	1	7	Sipa1l1
Etv61	0.000915112	0.269359	0.221	0.176	1	7	Etv6
Tspan13	0.000975803	0.26362	0.317	0.283	1	7	Tspan13
Atp11b	0.00104646	0.254613	0.357	0.33	1	7	Atp11b
Atp8b41	0.00117343	0.312179	0.408	0.411	1	7	Atp8b4
Wdr44	0.00118521	0.264454	0.196	0.153	1	7	Wdr44
Tnfaip8l21	0.00152104	0.256203	0.252	0.208	1	7	Tnfaip8l2
Smpdl3a1	0.00153022	0.251549	0.247	0.203	1	7	Smpdl3a
Pdcd41	0.00161204	0.256551	0.399	0.37	1	7	Pdcd4
Inpp1	0.00195051	0.250616	0.168	0.128	1	7	Inpp1
Tcof1	0.00241697	0.284947	0.354	0.343	1	7	Tcof1
Peli1	0.00266262	0.255986	0.48	0.496	1	7	Peli1
Pcgf5	0.00287339	0.276017	0.228	0.194	1	7	Pcgf5
Kat6a	0.00323097	0.289495	0.233	0.198	1	7	Kat6a
Pla2g16	0.00353852	0.276397	0.545	0.594	1	7	Pla2g16
Dnajc3	0.00359226	0.262564	0.455	0.468	1	7	Dnajc3
Cd2ap	0.00366121	0.250986	0.142	0.106	1	7	Cd2ap
Fnbp4	0.0058115	0.292926	0.268	0.243	1	7	Fnbp4
Ppa12	0.00628011	0.439953	0.301	0.293	1	7	Ppa1
Ccnb21	0	1.47161	0.856	0.071	0	8	Ccnb2
Birc51	4.29609e-271	1.08907	0.795	0.095	9.01276e-267	8	Birc5
Cdkn31	4.14198e-236	0.721237	0.473	0.038	8.68947e-232	8	Cdkn3
Cep551	5.87615e-234	0.9233	0.689	0.087	1.23276e-229	8	Cep55
Pttg11	5.92414e-228	1.43873	0.905	0.18	1.24282e-223	8	Pttg1
Cks1b1	9.40999e-193	0.99414	0.761	0.13	1.97412e-188	8	Cks1b
Knstrn1	1.87147e-188	0.687634	0.557	0.069	3.92617e-184	8	Knstrn
Cdca81	7.40756e-174	0.884395	0.644	0.098	1.55403e-169	8	Cdca8
Stmn12	2.10327e-147	0.873841	0.856	0.19	4.41245e-143	8	Stmn1
Selenoh1	3.51328e-147	1.09712	0.932	0.298	7.3705e-143	8	Selenoh
[truncated: 183 more rows]
