# Supplementary material for: Combined PD-L1/TGFβ blockade allows expansion and differentiation of stem cell-like CD8 T cells in immune excluded tumors
Source: Nat Commun. 2023 Aug 5;14:4703. doi: 10.1038/s41467-023-40398-4 (PMC10404279; doi:10.1038/s41467-023-40398-4)
Supplement: Supplementary file 7 — Supplementary Data 5 [file 41467_2023_40398_MOESM7_ESM.xlsx]

## Sheet: Fibroblasts
cnmf1	cnmf2	cnmf3	cnmf4	cnmf5	cnmf6	cnmf7	cnmf8	cnmf9	cnmf10	cnmf11	cnmf12	cnmf13	cnmf14	cnmf15	cnmf16	cnmf17
Col14a1	Mmd	Cxcl1	Anxa2	Ube2c	Gbp2b	Eif5a	Penk	Tagln	Bsg	Angptl1	Pmepa1	Hspa1a	Saa3	Lpl	Col1a2	Sema3c
Vegfd	Inhba	Tnfaip6	S100a10	Prc1	Gbp4	Nme1	Col13a1	Acta2	Gapdh	Smoc2	Cxcl14	Dnajb1	Serpinb2	Cxcl12	Aspn	Efhd1
Col3a1	Tm4sf1	Fosb	Vim	Top2a	Iigp1	Ptma	Crabp1	Tpm1	Ndufa4l2	Ltbp4	Crlf1	Hsp90aa1	Cxcl5	Apoe	Gpx3	Aldh1a3
Fn1	2410006H16Rik	Kdm6b	Anxa5	Ccnb1	Igtp	Rbm3	Enpp2	Myl9	Eno1	Hmcn2	Bgn	Hspb1	Hp	Cpxm1	Col1a1	Cd55
Fstl1	Ftl1	Nfkbiz	Crip1	Nusap1	Psmb8	Rps17	Col15a1	Cnn1	Pgk1	Thbs4	Tnc	Hspa1b	Lcn2	Igfbp4	Cthrc1	Htra3
Svep1	Plin2	Noct	Lmna	Cdk1	Ifi47	Npm1	Kera	Tmsb4x	Bnip3	Mgp	Spon1	Jun	Nos2	Lrg1	Rcn3	Scara5
Dpt	Esd	Nr4a1	S100a4	Tpx2	Gbp2	Ran	Egflam	Tpm2	Tpi1	Kng2	Col12a1	Hspa8	Sod2	Emb	Ptn	Anxa3
Slfn5	Prdx1	Il6	Emp3	Ccna2	Bst2	Ranbp1	Bmp7	Csrp1	Ero1l	Vtn	Igfbp7	Hsph1	Fth1	Selenop	Sparc	Cd34
Serpina3n	Cck	Has1	Crip2	Mki67	Gm12250	Ppia	Tcf4	Actb	Slc16a3	Prlr	Col5a2	Atf3	Rarres2	Col4a1	Col11a1	Clec3b
Sned1	Ercc1	Ifrd1	Cav1	Birc5	Gm43302	Eif4a1	Amn	Ctgf	P4ha2	Cilp	Rbp1	Hsp90ab1	Mt2	Fxyd6	Sfrp2	Fbn1
Sfrp2	Il1rl1	Ugdh	Cd44	Cenpf	Psmb9	Rpsa	Ednra	Actg2	P4hb	Sfrp4	Gng11	Dnaja4	Ccl11	Itm2a	Pdgfrl	Marcks
Col1a2	Glrx	Errfi1	Dpysl3	Cdca8	Cxcl9	Slc25a5	Col6a2	Thbs1	Fam162a	Gsn	Dkk3	Ubc	Efemp2	Gas6	Mfap2	Uap1
Gpc3	1110038B12Rik	Csrnp1	Tmsb4x	Cenpe	Gbp7	Pfn1	Hc	Cnn2	Vwa1	Rxfp1	Rnf149	Bag3	Mt1	Nid2	C1qtnf3	Dmkn
Tgfbr2	Rpl23	Gm43430	Tppp3	Hmgb2	B2m	Ybx1	F5	Lmod1	Pgam1	Fbln7	Olfml3	Hspe1	Fgf7	Tmem176a	Olfml3	Timp2
Fbn2	Il11	Trib1	S100a11	Kif11	Psmb10	Rpl14	Crispld1	Myl6	Mif	Abca8a	Cilp	Dnaja1	Bst1	Wfdc21	Cyp1b1	Pcolce2
Prelp	Gas5	Hk2	Ppp1r14b	Hmmr	Isg15	Rpl41	Cpz	Actg1	Pkm	Bmp4	Col15a1	Nfkbia	Fxyd5	Cd302	Mfap4	Igfbp5
Thbs3	Rpl28	Zfp36	Calm1	Smc2	Gbp3	Cfl1	Scube1	Dstn	Pgf	Myoc	Nkd2	Slc5a3	Lbp	Srpx	Sfrp1	Tnxb
Chl1	Eif1	Ccl7	Lgals1	Spc25	Plac8	Lgals1	Col6a1	Actn1	Krt19	Syndig1	Ltbp2	Fos	Slc39a14	Igf1	Itgbl1	Lrrn4cl
Galnt16	Hmga2	Sgk1	S100a6	Aurka	Ifitm3	Rps2	Nxph3	Cald1	Ldha	Mfap4	Sdc1	Btg2	Csf3	Fgf10	Tgfbi	Dpp4
Gda	Cryab	Ier3	Pfn1	Knl1	H2-K1	Ncl	Kif1a	Lrrc15	Vldlr	Tspan13	Fbln2	Hspd1	Ptx3	Tmem176b	Mxra8	Ptgs1
Adamts15	Gm43154	Gm38357	Tagln2	Pbk	Cd74	Rps23	Col18a1	Vcl	Mgarp	Entpd2	Sema7a	Ubb	Serping1	Col4a2	Mmp14	Creb5
Scn7a	Gsta4	Nfatc1	Myadm	Cks2	Psme1	Sec61b	Slit2	Nexn	Tmem45a	Ntrk2	Tgfb1	Jund	Cxcl12	Serpina3n	Selenom	Axl
Cemip	Fau	Ier5	Csrp2	Plk1	Ly6a	Lrrc59	Hmcn1	Sbspon	Serpine1	Ren1	Itgb5	Gem	Ptgis	Srgn	Cd63	Akr1c18
Cmah	Npc2	Nr4a3	Serpinb6a	Cdc20	Irgm1	Ckap4	Pla1a	Myl12a	Selenbp1	Deptor	Gpc1	Egr1	Ccl2	Ahsg	Tmem64	Bmp3
Clec3b	Gsto1	Junb	Loxl2	Racgap1	Stat1	Nhp2	Srpx	Cpxm2	Higd1a	C3	Col23a1	Junb	Il13ra2	Apod	Cdh11	Sbsn
Itm2a	Snhg12	Ccl2	Cavin3	Pclaf	Ifi203	Eef1g	Map2	Tpm4	Fau	Dcn	Itga1	Ier2	Lox	Mme	Pcolce	Efemp1
Nid1	Rps5	Ptp4a1	Ldha	Ckap2l	Gm4951	Srm	Tmsb10	Ankrd1	Mt1	Igf1	Tfpi2	Gadd45b	Gm12840	Il33	Ssr2	Anxa1
Pam	Grem1	Klf4	Actg1	Anln	H2-Eb1	Hnrnpa1	Ndnf	Flna	Ndrg1	Bmp5	Tmem119	Phlda1	Med24	Il1r1	Egfl6	Pi16
Man2a1	Zfas1	Dusp10	Iqgap2	Arl6ip1	H2-Ab1	Rpl3	Igfbp2	Myh11	Hilpda	Fxyd6	Pcsk5	Dusp1	Sdc4	Cyp7b1	Mtch1	Mgll
Adamts5	Lgals3	Ccnl1	Lrrc17	Kif20b	Fam26f	Btf3	Vwc2	Col8a1	Pgp	Ar	Runx1	Dnajb4	Ccl8	Il6st	Postn	Emilin2
Vgll3	Rpl12	Ptx3	Tubb3	Sgo2a	Samhd1	Rpl11	Lum	Palld	Lox	Cygb	F2r	Gm16310	Pcsk5	Cfh	Col5a1	Tmem100
Tnxb	Rps3	Cxcl2	Eif5a	Aurkb	Psme2	Fkbp11	Cntn1	Fam198b	Egln1	Eln	Pdgfrb	Cyr61	Barx2	Apoc1	Mmp23	Itih5
Lbp	Rpl32	Ptgs2	Gas7	Smc4	H2-Aa	Eef1d	Lama2	Itgb1	Plod1	Gas6	Gpm6b	Ifrd1	Epas1	Mrap	Ppib	Ugp2
Ccdc80	Rpl37	Egr1	Cavin1	Aspm	Tap1	Hmgb1	Ptpre	Hs6st2	Bnip3l	Pcolce	Bpgm	Klf6	Slc16a1	AW112010	Ctsk	Cd248
Prg4	Rpl17	Pim1	Aqp1	Kif2c	Zbp1	Srsf3	Tbx2	Cdc42ep3	Rbp4	Mest	Spp1	Zfp36	Lmcd1	Sfrp1	Tnn	Wnt2
Ggt5	Rpl9	Nfkbia	Nme1	Stmn1	Ifi44	Prmt1	Lsamp	Tnn	Ndrg2	Itgbl1	Mical2	Ppp1r15a	Ctsh	Sned1	Serpinh1	Prss23
Cd248	Rps8	Gm42679	Txn1	Depdc1a	H2-DMa	Atp5b	Frem1	Cd59a	Prelid2	Nfib	Cd9	Gadd45g	Apln	Ndnf	mt-Cytb	Gfpt2
Plagl1	Gm45716	Mcl1	Gap43	Tmpo	Ifit3	Rplp2	Spon1	Col11a1	Cox4i2	Chrdl2	Gas1	Sqstm1	App	Ankrd55	Mdk	Krtdap
Tgfbr3	Npm1	Zfp36l1	Capn2	Mxd3	Gbp5	H2afz	Igf1	Abracl	Vegfa	Zbtb20	Sulf1	Gm20186	Prdx5	Reg1	Ncam1	Mfap5
Col28a1	Hbegf	Tnfaip3	Tubb2b	H2afx	Ly6e	Atp5g1	Ccdc80	Pawr	Fam19a2	Chodl	Mfge8	Swt1	Dram1	Mycbp2	Fkbp7	Igfbp6
Heg1	Rps16	Myc	Ppa1	Cenpa	AW112010	Rpl8	Syn2	Actn4	Vdac1	Sparcl1	Prkar1a	Pnrc1	Pdpn	Cyp1b1	Arf5	Ckb
Lrrc17	Rpl13	Maff	Cfl1	Tubb4b	H2-T23	Rps11	Megf6	Lpp	Adm2	Podn	C1qtnf6	Gm17056	Ndufa4l2	Chl1	Cnpy2	Pcsk6
Steap4	Ctsl	Tnfaip2	Htra3	Kif23	Trim30a	Serbp1	a	Esyt2	Gpi1	Col6a6	Ass1	Dusp8	Esd	Mmp3	Ssr4	Olfml2a
Man1a	Clic1	Irs2	Dynll1	Incenp	Mndal	Rpl4	Sema5a	Kcnmb1	Aldoa	Frzb	Postn	H3f3b	Rnd1	Ccl9	Plpp1	Nid1
Col5a1	Rps10	Gm37899	Trabd2b	H2afz	Irf7	Set	Col4a2	Mylk	Pfkl	Ogn	Ptk7	Tnfaip3	C1rb	Reg3g	Csrp2	Heg1
Sfrp4	Slc2a1	Gm37140	Tuba1a	Pimreg	Cxcl10	Serpinh1	Eln	Tagln2	Slc2a1	Adh1	Serpinf1	Id3	Abcc3	Fgf23	Bgn	Fndc1
Pamr1	Rps15a	Btg1	Emp1	Tacc3	H2-DMb1	Ostc	Sbspon	Tgfb3	Rbms2	Gnas	Rflnb	Rhob	Chl1	Gdf10	Matn2	Cadm3
Ltbp1	Snhg6	Dot1l	Lrrc59	Mis18bp1	H2-D1	Srsf2	Prkcb	Cnn3	Timp1	Adamtsl2	Pdgfrl	Ier5	Nbl1	C3	Snhg18	Scara3
Loxl1	Naca	Thbs1	Ptms	Ect2	Apol6	Ssr2	Rarres1	Des	Kctd11	Pgr	Sparcl1	Rnd1	Ddah1	Cst3	Nt5dc2	Tek
Il11ra1	Rack1	G530011O06Rik	Reep5	Tk1	Tapbp	Cox5a	S1pr1	Pappa	Cda	Mup5	Thbs2	Sat1	Prokr2	Cldn15	Cpz	Adamts5

## Sheet: Tumor
cnmf1	cnmf2	cnmf3	cnmf4	cnmf5	cnmf6	cnmf7	cnmf8	cnmf9	cnmf10	cnmf11	cnmf12	cnmf13	cnmf14	cnmf15	cnmf16	cnmf17
Asns	Gbp4	Ogn	Pclaf	C1qc	Serping1	Cxcl1	Dusp4	Kcnq1ot1	Hspb1	Eif5a	Ifit1	Pgam1	Ube2c	Dcn	Acta2	Msmo1
Mthfd2	Gbp2b	Ftl1	Hist1h1b	C1qa	Rarres2	Nfkbia	Lgals3	Gm26917	Dnajb1	Nme1	Isg15	Fam162a	Cenpf	Cst3	Cthrc1	Idi1
Psph	Gbp2	Rbp1	Hist1h2ap	Ctss	Fstl1	Ifrd1	Eif1	Ahnak	Hsp90aa1	Ppp1r14b	Ifit3	Pgk1	Cenpa	Spp1	Fdps	Cd9
Gas5	Cd74	Gstm1	Tyms	Fcer1g	Saa3	Junb	Cryab	Myh9	Atf3	Fkbp11	Rsad2	Bsg	Prc1	Aspn	Gng11	Fdps
Snhg1	Ly6a	Itm2b	Rrm2	Ctsc	Col5a2	Nfkbiz	Ndrg1	Hnrnpu	Hspa1b	Lyar	Usp18	Ldha	Ccnb1	Enpp2	Igfbp7	Cyp51
2410006H16Rik	Iigp1	Rpl18a	Dek	Cxcl9	Xist	Ier3	Adm	Eif3a	Phlda1	Ran	Ifit3b	Bnip3	Cdc20	Col3a1	Myl12a	Spp1
Sars	Igtp	Ier2	Tk1	Apoe	Ctsk	Cxcl2	Plin2	Rrbp1	Dnaja4	Ppa1	Cmpk2	Higd1a	Nusap1	Lum	Pmepa1	Sqle
Gdf15	Gbp7	Prdx2	Stmn1	C1qb	Lox	Zfp36	Mt2	Ankrd11	Ubb	Pfn1	Oasl1	Tpi1	Hmmr	Mmp2	Sparc	Mvd
Snhg12	H2-Eb1	Rps9	Tubb5	Tyrobp	Cxcl14	Tnfaip3	Slc2a1	Gm42418	Bag3	Ncl	Mx1	Gapdh	Cks2	Serpinf1	Myl9	S100a4
Herpud1	H2-Aa	Nr2f1	Lig1	Gatm	Mfap5	1810011O10Rik	Hilpda	Sema3a	Hsph1	Nhp2	Phf11d	Mif	Birc5	Itgbl1	Tuba1a	Gchfr
Atf5	Ifi47	Btf3	Clspn	Aif1	Timp1	Egr1	Mt1	Eif4g1	Serpinh1	Ybx1	Irf7	Egln1	Aurka	Sdc2	Myl6	Hmgcs1
1110038B12Rik	Psmb10	Cavin2	mki67	Cd52	Tnc	Btg2	Ankrd37	Sfpq	Cryab	Ddx39	Cxcl10	Pkm	Kif20b	Ank	Actg1	Fdft1
Nars	Gbp3	Gabarap	Pbk	Serpina3g	Tagln	Irf1	Pim1	Plec	Dnajb4	Rps2	Ifi44	Ero1l	Cenpe	Cpq	Gjb3	Tspo
Trib3	H2-DMa	Prrx2	Atad2	Ccl8	Htra3	Ptgs2	Upp1	Cald1	Dnaja1	Cct5	Ifit2	Aldoa	Tpx2	Ctsl	Dut	Fth1
Hspa9	Psmb8	Hcfc1r1	Esco2	Cfp	Sulf1	Pnrc1	Gpr137b	mt-Nd6	Jun	Hspd1	Ifi203	Slc16a3	Tubb4b	Igfbp7	Wisp1	Dbi
Cyb5r1	Gm12250	Trps1	Dhfr	Ccl7	Col1a1	Nr4a1	Cstb	Ncl	Hspe1	Rps27l	Oasl2	Eno1	Hmgb2	Enpp1	Tnnt2	Pmvk
Atf4	H2-Ab1	Uqcrh	Fbxo5	Ccl12	Emb	Fosb	Dynap	Prrc2c	Slc5a3	Ndufa4	Rtp4	Gpi1	Pttg1	Colec12	Actb	Igfbp6
Zfas1	H2-DMb1	H3f3a	Tuba1b	Trem2	Abi3bp	Ier2	Tpt1	6820431F20Rik	Hspa8	Npm1	Ifitm3	Bnip3l	Plk1	Mgp	Cnn3	Fgfbp1
Psat1	Psmb9	Pfdn5	Hat1	Lyz2	Marcks	Rhob	Rassf8	Malat1	Gadd45b	Eno3	Bst2	P4ha2	Cdca8	Sparc	Tpm1	Prdx1
Eif2s2	Psme1	Map1lc3b	Mcm7	Csf1r	Lrrc32	Dusp5	Btg1	Chd4	Hsp25-ps1	Srm	Ifi202b	Isg20	Tacc3	Col6a1	Csrp2	Acat2
Eif4ebp1	Bst2	Rps27	Cenph	Marcks	Ptgis	Fos	Lrrfip1	Pnn	Gadd45g	Hspe1	Mx2	Mgarp	Kif2c	Col6a2	Cnn2	Areg
Eif1	Stat1	St3gal5	Dscc1	Tmsb4x	Hspa1a	Jun	Plaur	mt-Rnr1	Zfand2a	Set	Trim30a	Ndufv3	Ckap2	Ctsb	Csrp1	Scd2
Gars	AA467197	Rpl3	Mcm5	Xist	Sparc	Bhlhe40	Mxi1	Atrx	Arc	Snrpf	Tor3a	Pgm2	Ube2s	Itm2b	Pdlim7	Eef1a1
Chac1	Irgm1	Gstt1	Top2a	Il2rg	Thy1	Fosl1	Plau	Dst	Hspb8	Eef1g	Apol9a	Vwa1	Sgo2a	Cfh	Crabp2	Hsd17b7
Slc3a2	Lap3	Eef1a1	Rad51ap1	Arhgdib	Il33	Sdc4	Tiparp	Plxnb2	Tubb2a	Serbp1	Samd9l	Pfkl	Arl6ip1	Pcolce	Col1a2	Rpl8
Shmt2	Ifitm3	Cox7a2l	Smc2	Fcgr4	Has1	Ubc	Rsbn1	Hdlbp	Hspd1	Ranbp1	Rnf213	Ostf1	Pimreg	Postn	Cald1	Hmgcr
Snhg8	Psme2	Igfbp4	Tipin	Fam26f	Il6	Csrnp1	Rpl23	2900097C17Rik	Hsp90ab1	Cfl1	Xaf1	Pfkp	Ccnb2	Fn1	Abracl	Krt8
Ddit3	Batf2	Slc6a2	Dnajc9	Cd68	Ccl2	Il11	Denr	Baz1b	Ier5	Wfdc2	Gbp3	Anxa2	Cdca3	Cilp	Idi1	Tecr
Nupr1	Apol10b	Angpt1	Spc24	Nr1h3	Pgf	Cdkn1a	Itpk1	Myof	Ubc	Ybx3	Ifih1	Plod2	Ccna2	Timp2	Timp1	Cdk2ap2
Ghitm	Gm8995	Selenom	Rad51	Cyba	Bgn	Sqstm1	Fau	mt-Nd5	Saraf	Dnajc2	Parp14	Ankrd37	Cdk1	Nbl1	Ctgf	Insig1
Car6	Tap1	Cfh	Hist1h2ae	Mpeg1	Hp	Zfand5	Cystm1	Ranbp2	Jund	Cyc1	Zbp1	Mt1	Racgap1	Clu	Crlf1	Wnt10a
Tars	Ly6c1	Bloc1s1	Cenpm	H2-Ab1	Fbn1	F3	Jsrp1	Nsd2	Gm16310	Lgals1	Ifi204	Adm	Kif23	Aebp1	Msmo1	Erg28
Fgf21	Apol6	Rpl10a	Hmgb2	Lst1	Mgst1	Tsc22d1	Mdm2	Flna	Dusp1	Cct6a	Ddx60	Hilpda	Smc4	Malat1	Ppib	Il1rl1
Slc7a5	Samhd1	Ifitm2	Prim1	Pycard	Rcn3	Klf6	Serpinb6a	Trps1	Gem	Atp5b	Daxx	Tmsb10	Calm2	Arg1	Ass1	Esd
Aldh1l2	Zbp1	Gsn	Hells	AW112010	Gm12840	Lif	Inhba	Hnrnpa2b1	1810011O10Rik	Pa2g4	Apol9b	Gbe1	Top2a	Hsd11b1	Cyp51	Scd1
Eprs	Gbp8	Fth1	Slbp	Sash1	Serpinf1	Ccnl1	Actg1	Kars	Ppp1r15a	Lrrc59	Ly6e	Ier3	Knstrn	Matn2	Dstn	Dap
Ankrd1	Pla2g16	Fos	Mcm6	Zmynd15	Tmsb4x	Jund	Vim	Hnrnpa0	Cyr61	Nop56	Slfn2	Fau	Kif11	Npc2	Cotl1	Rnf11
Rps8	Gm43302	Ddah2	Tcf19	Acod1	Col3a1	Klf4	Ero1l	Samd9l	Klf6	Prdx6	Ifi207	Slc2a1	Mki67	Bgn	Anxa2	Crip1
Angptl6	AW112010	Rps15a	Aurkb	Unc93b1	Cxcl3	Tnfaip2	Vapa	Prpf4b	Hmox1	Npm3	Ccl5	Aldoc	Aspm	Igfbp6	Basp1	Avpi1
Pck2	Gm4951	Gsta4	H2afz	H2-Aa	Ccl7	Sgk1	Ptges	Nedd4	Sfn	Gcsh	Gbp5	Car12	Knl1	Gpm6b	Tpm4	Ndufa4
Eif3c	H2-DMb2	Rps20	Rrm1	Cd74	Lbp	Phlda1	Ptgs2	Wnk1	Ifrd1	Odc1	Slfn8	Sap30	Mis18bp1	Ass1	Col8a1	Lgals1
Rps5	Gbp5	Rpl10	Neil3	Ifi44l	Rasl11a	Areg	Ahnak	mt-Co1	Pnrc1	Cycs	Pnp	Tnfrsf9	Anln	Fbln2	Hmgcs1	Crip2
Gpt2	C1s1	2410006H16Rik	Rfc2	Ifi30	Gli3	Socs3	Tmsb10	Lamb1	Rhob	C1qbp	Eif2ak2	Pafah1b3	Ckap2l	Kng2	Col1a1	Nsdhl
Rps3	Casp1	Sord	Nasp	Nlrp3	Gm13889	Egr3	Klk8	D10Wsu102e	Serpine1	Krt8	Sp100	Eno2	Reep4	Pmepa1	Fdft1	Ppia
Phf10	Il18bp	Mxd4	Fen1	Slfn2	Thbs2	Cxcl5	Dusp5	Dync1h1	Fos	Tomm20	Cd274	Pdk1	Ndc80	Cd248	Hmgcr	Arpc1b
Aars	H2-K1	Rps12	Orc6	Fsbp	C2	Id3	Eif4a2	Pcm1	Nfkbia	Timm8a1	Dhx58	P4hb	Dbf4	Rbp1	Fbln2	Gm3571
Lars	Idnk	Cd63	Cdk1	Cxcl10	Gas1	Mcl1	Klk10	Scd2	Gm20186	Phb2	Herc6	Ndrg1	Cdkn2d	Cd63	Gnas	Lgals7
Rps18	Insl6	Selenow	Cenpu	Ccl2	Col1a2	Plau	Flrt3	Gm42676	Gm8818	Atp5f1	Gbp7	Prelid2	Kif20a	Sod3	Mvd	Aldh2
Rps3a1	H2-T23	Cdkn2c	Rfc5	Fam72a	Il3ra	Sox9	Rpl17	Gja1	Adrb2	Cct3	Mndal	Car9	Kif22	Il33	Ostc	Dynap
Rpl8	Psma7	H2-D1	Hist1h1e	Lyn	Col12a1	Errfi1	Rps24	Cdv3	Sox9	Dkc1	Trafd1	Fstl3	Tubb5	Plxdc1	Itgb1	Pthlh

## Sheet: Myeloid
cnmf1	cnmf2	cnmf3	cnmf4	cnmf5	cnmf6	cnmf7	cnmf8	cnmf9	cnmf10	cnmf11	cnmf12	cnmf13	cnmf14	cnmf15	cnmf16	cnmf17	cnmf18	cnmf19
Lgals3	Ifitm6	Ube2c	Spp1	Itgae	Siglech	Gbp2b	Ctsk	Hspa1a	Cacnb3	Tnf	Timp2	Ifit3	S100a6	Sod2	Rrm2	Ms4a7	Npm1	Cd74
Ndrg1	Plac8	Ccnb1	Tmsb4x	2021-09-03	Cox6a2	Ly6a	Acp5	Hsp90aa1	Ccl22	Nfkbia	Folr2	Isg15	Adam8	Ccl5	Pclaf	Cd300e	Hspd1	Apoe
Pmp22	Hp	Cenpf	Bcl2a1d	Xcr1	Ccr9	Gbp2	Slc9b2	Hspa1b	Fscn1	Cxcl2	Ctsb	Ifit1	Pkm	AW112010	Tyms	Clec4a2	Jdp2	H2-Eb1
Ero1l	Msrb1	Cdc20	Ch25h	Btla	Klk1b27	Serpina3g	Mmp9	Ubc	Serpinb6b	Nfkbiz	Ctsd	Ifit2	Pgk1	C3	Tk1	Clec4a1	Ppp1r14b	Rps29
Bhlhe41	Samhd1	Hmmr	Hexb	Gcsam	Iglc3	Fcgr4	Mt3	Hsph1	Stat4	Cxcl1	Mrc1	Usp18	Eno1	Grina	Hist1h1b	Gm5150	C1qbp	Rtcb
Bnip3	Napsa	Arl6ip1	Ccl12	Cst3	Atp1b1	Cxcl9	Atp6v0d2	Dnajb1	Nudt17	Nlrp3	Serpinb6a	Cmpk2	Gsn	Pla2g7	Dut	Aif1	Eef1g	Ctss
Atf4	Smpdl3a	Birc5	Cxcl14	Fndc5	Atp2a1	H2-DMb1	1110008P14Rik	Atf3	Ccr7	Il1b	Stab1	Ifi44	Capg	Prdx1	Stmn1	Cd72	Eif5a	Cd81
Sap30	Cytip	Cenpa	Rnase4	Clec9a	Klk1	Iigp1	Adcy3	Fos	Tbc1d4	Cd14	Nxpe5	Rsad2	Anxa2	Cd1d1	Hist1h2ap	Clec4b1	Ncl	Eef1a1
Ftl1	Sell	Tubb4b	Pmepa1	Plet1	Mzb1	Fgl2	Ocstamp	Dnaja1	Serpinb9	Ccrl2	Cd63	Mx1	Msr1	Cybb	Asf1b	Clec4a3	Hspe1	C1qa
Psmd8	H3f3a	Prc1	Rps8	Cd24a	Ptprcap	Gbp4	Oscar	Bag3	Gm13546	Cd83	Lgmn	Phf11b	Fxyd5	Nos2	Esco2	Pfn1	Lmna	Rgs10
Fth1	Taldo1	Pttg1	Rpl8	A530099J19Rik	Sla2	Sectm1a	Dcstamp	Jun	Il4i1	Tnfaip3	Selenop	Ifi204	S100a10	Cd38	Lig1	Nr1h3	Rps2	Itgb5
Tmem189	Ly6c2	Tpx2	Rps18	Snx22	Pacsin1	H2-DMa	Myo1d	Hspa8	Ly75	Acod1	Ccl8	Oasl1	Aldoa	Prdx5	Clspn	Adgre1	Srm	Rps9
Rilpl2	Mgst1	Plk1	Rps3a1	Naaa	Pir	H2-Ab1	Myo1b	Rhob	AL589871.2	Il1a	Lyz2	Phf11d	Ltb4r1	Ly6i	Pbk	Clec12a	Nhp2	H2-Aa
Basp1	Ccr2	Cenpe	Rpl32	Mycl	2021-09-01	Pla2g16	Atp6v1b2	Hsp90ab1	Il12b	Cdkn1a	Gas6	Ifi209	Gapdh	Fth1	Dek	Pou2f2	Rpl14	C1qb
Gapdh	Ly6c1	Cdca8	Rpl12	Gm43914	Iglc2	Cd74	Rufy4	Jund	Tmem123	Tlr2	Apoe	Ifi203	Pid1	Ninj1	Fbxo5	Slamf9	Set	Cox7a2l
Slc2a1	Ifitm2	Ccnb2	Rps6	Wdfy4	Smim5	H2-Eb1	Coq8a	Btg2	Socs2	Ccl4	Tmem37	Ifit3b	Tpi1	Blvrb	Rad51	Lst1	Prmt1	Man2b1
Bsg	Aldh2	Top2a	Rack1	Ffar4	Cd7	Fam26f	Bdh2	Klf6	Net1	Rab20	Lamp1	Ifi202b	Lgals1	Tnfaip2	Gmnn	Slc11a1	Rps17	H2-Ab1
Mt1	Cd300a	Cks2	Rpl10a	Khdrbs3	Igkc	Hk3	Chchd10	Fosb	Strip2	Ccl3	Grn	Irf7	Slc16a3	Fpr2	Rad51ap1	Tmsb4x	Pa2g4	Ntpcr
Slc7a2	Ifitm3	Cks1b	Rpl14	Flt3	Cd8b1	Stat1	Atp6v1g1	Rgs2	Glipr2	Mir155hg	Itm2b	Isg20	Ldha	Acsl1	Rrm1	Lgals1	Mrpl12	Rps4x
Mt2	Adgre5	Nusap1	Rpsa	Ttc39a	Paqr5	Psmb8	Akap6	Cxcr4	Bcl2l14	Plek	Cbr2	Slfn5	C5ar1	Slc7a11	Hist1h2ae	Ms4a6b	Phb2	C1qc
Aldoa	Lsp1	Mki67	Rps27a	Hepacam2	Eldr	Lap3	Slc37a2	Ier5	Slc27a3	Ifrd1	Trem2	Rtp4	Glrx	Fpr1	Mcm7	Fyb	Rpl8	Rps20
Adm	Ptpn1	Ccna2	Coro1a	Ppt1	Lefty1	Slamf8	Kbtbd11	Klf2	Ramp3	Slfn2	Ctsl	Pnp	Arg1	Clec4n	Tuba1b	Cfp	Apex1	Tmem119
Fam46c	Tspan13	Hmgb2	Rps17	Gpr33	Spns3	Il18bp	Cyp2s1	Dusp1	Sema7a	Ptgs2	Enpp1	Xaf1	Dpep2	Cyb5a	Atad2	Cd79b	Tomm5	Rpl10
Ldha	Coro1a	H2afx	Gm10260	Kit	Upb1	H2-DMb2	Nyap2	Zfand2a	Scin	Dusp5	Fcgrt	Ms4a4c	Fam162a	Slpi	Tubb5	Limd2	Cct6a	Gas5
Hmox1	Ptprc	Pimreg	Rps2	Ppp1r14a	Runx2	H2-Aa	Atp6v0e	Ppp1r15a	Rogdi	Cflar	Ctss	Ifih1	Vim	Esd	Mcm5	Ms4a6c	Acy1	Hexb
Bhlhe40	Add3	Aspm	Ccl2	H2-Oa	Fcrla	Gbp3	Fam102a	Gadd45b	Calm1	Socs3	Fn1	Trim30a	Pgam1	Bst1	Ccne1	Pycard	Tomm40	Fau
Eif4ebp1	Emb	Ube2s	Eif5a	Naga	Spint1	Ppt1	Ephx2	Pmaip1	Txndc17	Pde4b	Vat1	Daxx	Srgn	Hif1a	Tipin	Rap1b	Eef1d	Rplp1
Mif	Tmsb10	Racgap1	Ccl7	Tlr11	Prkca	Klrk1	Nudt22	Klf4	Tuba1a	Clec4e	Ccl6	Phf11a	Ifitm1	Clec4e	Smc2	Itm2b	Ranbp1	Rps11
Gna13	Wfdc17	Knstrn	Eef1g	Ece1	Mctp2	Igtp	Atp6v0b	Rgs1	Cbfa2t3	Kdm6b	Igfbp4	Fcgr1	Itgam.1	H2-D1	Spc24	Magohb	Atp5g1	Ppfia4
P4hb	Serpinb10	Cdk1	Rpl13	Gm2a	Cd8a	Txn1	Tmem204	Nr4a1	Tubb2b	Ier3	C1qa	Tor3a	Clic1	Fam102b	Uhrf1	Psma6	Idh3a	Rps21
Eif1	Mcemp1	Aurka	Rpl3	Zbtb46	Cd59a	AW112010	Fam109a	Ubb	Samsn1	Junb	Psap	Trim30d	Mif	Clec4d	Ptma	Actb	Hsp90ab1	Cx3cr1
Tpi1	Sub1	Ckap2l	Sdf2l1	Rasgrp3	Rnase6	Gm4951	Atp6v1d	Rasgef1b	Cacna1s	Ets2	Wfdc17	Rnf213	Adssl1	Fbxl5	Ezh2	Grn	Vegfc	Rpl37a
Gpi1	Sem1	Smc4	Rps26	Plbd1	Bst2	Cnn3	Uqcr10	Zfp36	Epsti1	Tnfsf9	Cd68	Ifi207	Cfp	C1s1	Cenph	Fcer1g	Tomm20	Rpl39
Fnip2	Ms4a6c	Kif23	Rpl11	2021-09-06	Bcl11a	Ifi47	C77080	Mafk	Traf1	Nfe2l2	Syngr1	Ifi214	Clec5a	Cyba	Pcna	Blvrb	Btf3	Rpl23
Card19	Hopx	Cdca3	Anxa3	Sdad1	Dnajc7	H2-T23	Mdh1	Nr4a2	Zbtb46	Egr2	Hal	Mndal	Lrp1	H2-K1	Fen1	Cfl1	Rpl4	Trem2
Rragd	Tpd52	Bub1b	Ccnd1	Dpp4	Cd4	Psme2	Plekhf1	Gm37558	Tnfrsf4	Zc3h12a	Pld3	Cxcl10	Gpi1	Upp1	Ranbp1	Efhd2	Gfra2	Rps24
Plin2	Gm9733	Kif20b	Pdia6	Cbfa2t3	Kmo	Entpd1	Kazn	Junb	Lsp1	Il1rn	Snx2	Ddx60	Ywhah	Ptges	Spc25	Acp2	Rpl41	Ly86
Il7r	Gda	Cep55	Angptl2	Gpr82	Gm5547	Irgm1	Nfatc1	Zfp36l1	Gnb4	Csrnp1	Fcna	Ifit1bl1	P4hb	Creg1	Cdc45	Rac2	S100a4	Pmepa1
Pnrc1	Mrpl33	Cdkn3	Rps3	Zfp366	6720464F23Rik	Psmb9	Mst1r	Hspe1	Arhgap28	Mxd1	Hebp1	Slfn4	Itgb2	Procr	Top2a	Pld4	Rps8	Rpl17
Cd274	Pdlim1	Nucks1	Rps15a	Cxcr3	Card11	Nampt	Ndufa4	Gadd45g	Lactb	Tnip3	Abca1	Ifi47	Cd9	Dram1	Cdca5	Hck	1500004A13Rik	2410006H16Rik
Hilpda	Gnas	Sapcd2	Cotl1	H2-Ob	Gm37529	Gm12250	Hexa	Gm17056	Pkib	Maff	Tmem86a	Ddx58	AA467197	Tma16	Aurkb	Lgmn	Dusp9	Rpl37
Mmp12	F13a1	Knl1	Ppp1r14b	Spint2	Tcf4	Tap1	Tfrc	Hspb1	Gyg	Zfp36	Cd84	Ifi211	S100a11	Gm15056	Mcm6	Ly6e	Cct3	Rpl3
Higd1a	Ifi27l2a	Kif20a	Eif4a1	Plekha5	Spint2	Gbp7	Ckb	Plk2	Cnn2	Plaur	C1qc	Oasl2	Bnip3	Gclm	Dnajc9	Ms4a6d	Slc25a5	Cd33
Rhov	Itga4	Cdc25b	Nme1	Irf8	Trp53i11	Ctsc	Plxna4	Gm45153	Ccl17	Btg1	Colec12	Parp14	Tmeff1	Smpdl3b	Tcf19	Cd300c2	Rplp2	Rps12
Hk2	Cd177	Kif2c	Rpl5	P2ry10	Ablim1	Pdcd1lg2	S100a4	Gm12346	Ncoa7	Adora2b	Ms4a7	Oas3	Pdpn	Saa3	Dctpp1	Ehd1	Rpl18	Ctsh
Sdcbp	Lst1	Tacc3	Rpl41	Sult1a1	Rabgap1l	Psme1	Lag3	Mafb	Cst3	Tgif1	H2-D1	Ifi35	Clec4d	Emb	Cenpm	Pparg	Cct5	Olfml3
Samd8	H2afy	Kif22	Bcl2a1b	Atox1	Rell1	Gm43302	Actn1	H3f3b	Cmc2	Osm	Slc48a1	Slfn1	Emilin2	C1s2	Prim1	Ctsc	Timm13	Rpl18a
Mgarp	Chil3	Aurkb	Sec61b	Plcb4	Cxxc5	Gm4759	Spry1	Nfil3	Plppr4	Marcksl1	Pltp	Bst2	Emp3	Clec7a	Slbp	Marcks	Rcc2	Gatm
Grb2	Fgr	Incenp	Rpl22l1	Fam149a	Flt3	Gbp8	Cox4i1	Phlda1	Laptm4b	Id2	Rhoc	Ifi44l	Metrnl	Agtrap	Rfc5	Cox5a	Fkbp4	Eef2
Atp6v1a	Ncf2	Smc2	Calr	Kif5a	Snn	Gbp5	Atp6v1e1	Ifrd1	Spint2	Areg	Hexa	Mx2	Cyp4f18	Cd274	Syce2	Tmed10	Rps27a	H2-Ea-ps
