# Supplementary material for: Combined PD-L1/TGFβ blockade allows expansion and differentiation of stem cell-like CD8 T cells in immune excluded tumors
Source: Nat Commun. 2023 Aug 5;14:4703. doi: 10.1038/s41467-023-40398-4 (PMC10404279; doi:10.1038/s41467-023-40398-4)
Supplement: Supplementary file 8 — Supplementary Data 6 [file 41467_2023_40398_MOESM8_ESM.xlsx]

## Sheet: Myeloid_Combo_vs_Ctrl
	baseMean	log2FoldChange	lfcSE	stat	pvalue	padj	type
Gm4759	562.888	0.907833	0.0741898	12.2366	1.98088e-34	2.82989e-30	Predicted
Gbp2	2819.25	0.98446	0.0950055	10.3621	3.68643e-25	2.63322e-21	Coding
BC028528	1552.4	0.642368	0.062701	10.2449	1.24706e-24	5.93851e-21	Coding
Gbp2b	4336.47	0.978263	0.0989269	9.88874	4.6584e-23	1.66375e-19	Coding
Gbp3	1342.59	0.699035	0.0733777	9.52655	1.62605e-21	4.64595e-18	Coding
Ifi47	2165.82	0.697701	0.0735559	9.48531	2.41665e-21	5.75403e-18	Coding
Evl	1201.2	0.563494	0.059777	9.42661	4.23549e-21	8.64402e-18	Coding
Fam26f	1620.95	1.51351	0.162139	9.33465	1.01325e-20	1.60837e-17	Coding
Socs1	716.146	1.44706	0.15497	9.33772	9.84312e-21	1.60837e-17	Coding
Fgl2	3467.9	0.932553	0.102592	9.08994	9.90906e-20	1.41561e-16	Coding
Gm28438	1530.1	-0.443272	0.0526142	-8.42495	3.60917e-17	4.68733e-14	Predicted
Batf2	382.381	0.754576	0.0911264	8.28054	1.22619e-16	1.45978e-13	Coding
Ptgs2	1621.76	1.52338	0.184654	8.24995	1.58465e-16	1.74141e-13	Coding
H2-T23	4707	0.715166	0.0882992	8.09935	5.52538e-16	5.63825e-13	Coding
Gyg	951.046	0.672155	0.0832687	8.07211	6.90923e-16	6.58035e-13	Coding
Arl5c	488.436	1.32426	0.164631	8.04379	8.71034e-16	7.77725e-13	Coding
Irf1	1924.83	0.974912	0.121406	8.03015	9.73523e-16	8.18103e-13	Coding
Samhd1	4795.82	1.04654	0.13062	8.0121	1.12766e-15	8.94984e-13	Coding
Gbp5	683.095	1.19628	0.14994	7.97839	1.48253e-15	1.11471e-12	Coding
Lap3	1644.83	0.545712	0.0689627	7.91314	2.50975e-15	1.79271e-12	Coding
A530032D15Rik	261.502	0.897521	0.113854	7.88308	3.19414e-15	2.17293e-12	Coding
Tifa	685.112	0.591758	0.0752612	7.86272	3.75869e-15	2.44076e-12	Coding
Plbd1	1890.85	0.972331	0.124288	7.82323	5.14846e-15	3.19786e-12	Coding
Il27	144.934	1.21388	0.155328	7.81493	5.49945e-15	3.27355e-12	Coding
Gmfg	3072.35	0.547242	0.0702148	7.79382	6.50109e-15	3.5721e-12	Coding
Cept1	755.221	0.505293	0.064802	7.79749	6.31523e-15	3.5721e-12	Coding
Serpina3g	2075.41	1.46129	0.187918	7.77622	7.47242e-15	3.95374e-12	Coding
Sgms2	71.8937	1.62906	0.210201	7.74999	9.19003e-15	4.68888e-12	Coding
Klrk1	902.603	0.616558	0.0799119	7.71548	1.20531e-14	5.93761e-12	Coding
Iigp1	2865.49	1.01859	0.132259	7.70146	1.34518e-14	6.40573e-12	Coding
Gbp4	3112.37	1.2146	0.159056	7.63633	2.23506e-14	9.67579e-12	Coding
Gbp8	621.323	1.17693	0.154072	7.63884	2.19187e-14	9.67579e-12	Coding
Gm4951	834.679	1.05303	0.137858	7.63852	2.19732e-14	9.67579e-12	Predicted
Ifitm3	36617.9	0.577329	0.0763482	7.56179	3.97569e-14	1.67049e-11	Coding
AC238811.2	1537.32	1.22301	0.163026	7.50188	6.29075e-14	2.5677e-11	Noncoding
Gm12250	585.783	0.751884	0.100459	7.48446	7.18394e-14	2.85083e-11	Predicted
Casp4	551.603	0.695711	0.0933223	7.45493	8.99184e-14	3.47182e-11	Coding
Cers6	531.706	0.923103	0.124808	7.39621	1.40124e-13	5.26791e-11	Coding
Igtp	1635.07	0.747167	0.101333	7.37335	1.66392e-13	6.09508e-11	Coding
Csf3r	389.702	1.20818	0.163936	7.36983	1.70847e-13	6.10179e-11	Coding
Irgm1	1372.25	0.752858	0.102804	7.32321	2.4211e-13	8.43605e-11	Coding
Slc4a11	116.861	1.47027	0.20097	7.31587	2.55723e-13	8.69823e-11	Coding
Zbp1	2991.79	0.566925	0.0775735	7.30824	2.70671e-13	8.99258e-11	Coding
Ly6c2	3524.8	1.56066	0.213811	7.29926	2.89364e-13	9.39512e-11	Coding
Sp140	1314.73	0.654709	0.0907122	7.21743	5.298e-13	1.68194e-10	Coding
Prm1	44.6	1.70073	0.237398	7.16406	7.83228e-13	2.38068e-10	Coding
Batf3	227.563	1.1931	0.166516	7.16507	7.77493e-13	2.38068e-10	Coding
Il18bp	1607.71	1.2203	0.170476	7.15823	8.1728e-13	2.43243e-10	Coding
Thbs1	1121.79	1.57303	0.21984	7.15535	8.34588e-13	2.43325e-10	Coding
Rspo1	30.9371	1.95541	0.273941	7.13807	9.46529e-13	2.62665e-10	Coding
Laptm4a	2795.86	0.436338	0.0611401	7.13669	9.5608e-13	2.62665e-10	Coding
Fam174a	991.954	0.709561	0.0994088	7.13781	9.48321e-13	2.62665e-10	Coding
Plac8	11001.2	1.57077	0.22037	7.12787	1.01937e-12	2.74768e-10	Coding
Stat1	3433.81	0.750644	0.106148	7.0717	1.53052e-12	4.04908e-10	Coding
Gm43302	314.478	1.03293	0.14648	7.05169	1.76757e-12	4.57157e-10	Predicted
Hpse	848.553	0.901291	0.127847	7.04978	1.79202e-12	4.57157e-10	Coding
Gm8995	2873.68	0.607646	0.0863537	7.0367	1.96841e-12	4.93346e-10	Predicted
Trafd1	1542.54	0.662163	0.0943673	7.01687	2.26885e-12	5.51884e-10	Coding
P2ry14	346.066	0.725502	0.103403	7.01624	2.27924e-12	5.51884e-10	Coding
Sat1	5763.23	0.49351	0.0705992	6.99031	2.74287e-12	6.53077e-10	Coding
H2-Aa	53923.1	0.951645	0.136665	6.96334	3.32297e-12	7.78229e-10	Coding
Rnase6	628.345	1.37933	0.198302	6.95571	3.50789e-12	8.08286e-10	Coding
H2-T22	1418.14	0.627093	0.0902735	6.94658	3.74235e-12	8.48622e-10	Coding
Fcgr4	5770.2	0.765582	0.110837	6.90728	4.94022e-12	1.10275e-09	Coding
Cnn3	693.432	1.2528	0.182331	6.87101	6.37495e-12	1.40112e-09	Coding
Cd40	672.415	0.848903	0.123942	6.84921	7.42568e-12	1.60732e-09	Coding
Lst1	8198.89	0.74472	0.109195	6.82011	9.09701e-12	1.91117e-09	Coding
Gm10076	1986.36	-0.517968	0.0759282	-6.82181	8.99011e-12	1.91117e-09	Predicted
Pde4d	126.128	-0.97249	0.142694	-6.81522	9.41195e-12	1.92084e-09	Coding
Dhx58	519.902	0.504439	0.073997	6.81701	9.29534e-12	1.92084e-09	Coding
Gm5483	78.8895	1.69628	0.249437	6.80042	1.04315e-11	2.09893e-09	Predicted
H2-DMa	8323.42	0.404087	0.059473	6.79446	1.08721e-11	2.15721e-09	Coding
1500004A13Rik	24.2421	-2.28768	0.336997	-6.78844	1.13354e-11	2.21831e-09	Noncoding
F830016B08Rik	261.907	1.32411	0.195846	6.76098	1.37059e-11	2.64598e-09	Coding
Msrb1	3794.08	0.609007	0.0901037	6.75895	1.38994e-11	2.64756e-09	Coding
Tmsb10	20895	0.579836	0.0863143	6.71773	1.84572e-11	3.46947e-09	Coding
Ltb	338.928	1.01662	0.15145	6.71259	1.91204e-11	3.54745e-09	Coding
Itga1	75.2992	1.98737	0.29659	6.70072	2.07398e-11	3.79858e-09	Coding
Kynu	50.7074	2.05461	0.307309	6.68581	2.2965e-11	4.10707e-09	Coding
Cd74	146898	0.802671	0.12006	6.68559	2.29991e-11	4.10707e-09	Coding
Sowahc	433.773	0.721777	0.108178	6.67214	2.52108e-11	4.44644e-09	Coding
Gdap10	548.723	1.01776	0.152627	6.6683	2.58776e-11	4.50838e-09	Noncoding
Mcemp1	647.892	1.19854	0.179948	6.66047	2.72954e-11	4.6981e-09	Coding
Hist1h2ap	543.853	-1.50525	0.226521	-6.64508	3.03043e-11	5.1539e-09	Coding
Sell	312.985	2.13113	0.321954	6.61935	3.60777e-11	6.0636e-09	Coding
Tspan13	450.157	1.44975	0.219202	6.61373	3.74754e-11	6.22527e-09	Coding
Gm44292	495.614	1.22224	0.185331	6.59491	4.25515e-11	6.98725e-09	Predicted
H2-Eb1	45986	0.981704	0.149293	6.5757	4.84258e-11	7.8615e-09	Coding
Gbp7	1611.85	0.753646	0.11466	6.57286	4.93592e-11	7.92298e-09	Coding
Ifitm2	13557.6	0.497819	0.0758117	6.56652	5.15056e-11	8.17565e-09	Coding
Gpr18	227.036	0.643171	0.0979967	6.56319	5.26692e-11	8.26848e-09	Coding
Tap1	2509.88	0.548797	0.0837145	6.55558	5.54267e-11	8.51426e-09	Coding
Rsrp1	1504.5	0.622815	0.0949891	6.5567	5.50125e-11	8.51426e-09	Coding
Irf2	1188.94	0.517556	0.0789788	6.55311	5.6351e-11	8.56415e-09	Coding
Cybb	6015.99	0.784564	0.119835	6.54706	5.86812e-11	8.82442e-09	Coding
Slamf8	1255.21	0.933086	0.143272	6.51267	7.38271e-11	1.08731e-08	Coding
Cct3	1374.96	-0.543247	0.0834138	-6.51267	7.38253e-11	1.08731e-08	Coding
Tyrobp	23667.5	0.285704	0.0439447	6.50143	7.95591e-11	1.15978e-08	Coding
Slc31a2	806.441	0.807926	0.124513	6.48867	8.65958e-11	1.23677e-08	Coding
Slfn1	746.368	0.834575	0.128649	6.48721	8.74377e-11	1.23677e-08	Coding
Fos	5655.13	1.13869	0.175471	6.48936	8.62042e-11	1.23677e-08	Coding
Clec4a3	1676.41	0.732103	0.112958	6.48121	9.09879e-11	1.27437e-08	Coding
Napsa	1192.18	0.833705	0.128689	6.47846	9.2664e-11	1.28524e-08	Coding
Hp	663.878	2.18078	0.336833	6.47436	9.52172e-11	1.30796e-08	Coding
Psme1	7554.36	0.344274	0.0533072	6.4583	1.05886e-10	1.44066e-08	Coding
H2-Ab1	46658	0.910599	0.14114	6.45175	1.10562e-10	1.49009e-08	Coding
Slfn2	3537.16	0.646345	0.100957	6.40216	1.53192e-10	2.04533e-08	Coding
Pdgfa	374.037	-1.02344	0.159968	-6.39776	1.57669e-10	2.06647e-08	Coding
Clec4a1	1353.87	0.907494	0.141841	6.39797	1.57458e-10	2.06647e-08	Coding
AW112010	24752.7	0.861806	0.135641	6.35359	2.10344e-10	2.7318e-08	Noncoding
Klk1	81.9535	8.95428	1.41033	6.34906	2.16636e-10	2.78817e-08	Coding
Ggct	162.815	0.852216	0.13524	6.30153	2.9472e-10	3.75926e-08	Coding
Rassf4	891.95	0.509044	0.0808745	6.29425	3.08891e-10	3.90515e-08	Coding
Klrb1b	490.184	1.04777	0.166657	6.287	3.23666e-10	4.05604e-08	Coding
Hmgn2	902.68	-0.513775	0.0817627	-6.28373	3.30547e-10	4.10625e-08	Coding
Nfil3	660.08	1.45126	0.231117	6.27933	3.4004e-10	4.18777e-08	Coding
Lbh	323.165	0.775335	0.123606	6.27263	3.5501e-10	4.33477e-08	Coding
Dnaaf3	122.922	0.936049	0.14942	6.26457	3.73863e-10	4.52627e-08	Coding
Fbxl5	1025.97	0.836631	0.133758	6.2548	3.98037e-10	4.77845e-08	Coding
Ier5	2090.41	0.660821	0.105987	6.23492	4.52007e-10	5.38114e-08	Coding
I830127L07Rik	282.135	4.2518	0.683387	6.22166	4.91919e-10	5.80789e-08	Noncoding
Zfp36	3089.09	1.06616	0.171751	6.20759	5.38048e-10	6.30045e-08	Coding
Arf5	3873.7	0.311389	0.0502852	6.19246	5.92318e-10	6.82408e-08	Coding
Clec7a	2592.64	1.16026	0.187356	6.19281	5.91011e-10	6.82408e-08	Coding
Gm8186	515.119	-0.429385	0.0695013	-6.17809	6.48809e-10	7.41511e-08	Predicted
Sorl1	143.93	1.07048	0.173853	6.1574	7.395e-10	8.38453e-08	Coding
Fam49a	269.742	0.934229	0.151775	6.15537	7.49026e-10	8.42566e-08	Coding
AB124611	1512.56	0.759259	0.123511	6.1473	7.88153e-10	8.79653e-08	Coding
BC100530	17.9898	2.22693	0.362714	6.13964	8.27105e-10	9.15971e-08	Coding
Tapbpl	594.521	0.528372	0.0860848	6.13781	8.36655e-10	9.19419e-08	Coding
Birc3	406.113	0.84497	0.137737	6.13467	8.53372e-10	9.30632e-08	Coding
Marcks	2374.81	0.6779	0.110583	6.13022	8.77552e-10	9.44275e-08	Coding
Btg2	2197.28	1.15666	0.18869	6.12994	8.79103e-10	9.44275e-08	Coding
Flt1	97.0308	1.24123	0.20287	6.11834	9.45573e-10	1.00809e-07	Coding
Plcb1	52.4812	1.67302	0.273638	6.114	9.71666e-10	1.02068e-07	Coding
Ifitm6	917.028	1.81457	0.29676	6.1146	9.68022e-10	1.02068e-07	Coding
Tnfrsf11a	410.732	-0.585765	0.0960828	-6.09646	1.08442e-09	1.13081e-07	Coding
Fas	255.706	0.908729	0.149143	6.093	1.10812e-09	1.14714e-07	Coding
Nfkbia	2995.19	0.974067	0.160204	6.08018	1.2005e-09	1.22502e-07	Coding
Siglech	56.8756	8.38339	1.37872	6.08056	1.19761e-09	1.22502e-07	Coding
S100a11	7672.33	0.763067	0.125635	6.07366	1.25025e-09	1.26674e-07	Coding
Dusp1	1976.96	1.14218	0.188092	6.07248	1.25954e-09	1.26716e-07	Coding
Myl12b	3630.49	0.223598	0.0368305	6.071	1.27119e-09	1.26994e-07	Coding
Nod1	99.7894	1.06381	0.17538	6.06575	1.31343e-09	1.30303e-07	Coding
Pecam1	151.068	0.722749	0.119607	6.04272	1.51536e-09	1.49299e-07	Coding
A530040E14Rik	337.867	0.525783	0.0870398	6.04073	1.53423e-09	1.50123e-07	Noncoding
Arg2	970.684	1.33777	0.221629	6.0361	1.57888e-09	1.52404e-07	Coding
Rras	481.734	0.692656	0.114738	6.03686	1.57138e-09	1.52404e-07	Coding
Tap2	1420.51	0.5027	0.0834578	6.0234	1.70788e-09	1.62658e-07	Coding
Rps10-ps1	530.128	-0.514298	0.0853698	-6.02435	1.69788e-09	1.62658e-07	Ribosomal
Zyx	1845.62	0.920288	0.153157	6.0088	1.86901e-09	1.76826e-07	Coding
Socs3	2006.64	0.742481	0.1237	6.00227	1.94581e-09	1.82881e-07	Coding
Vars	380.942	-0.59982	0.10007	-5.99402	2.04712e-09	1.89904e-07	Coding
Specc1	238.219	-0.673999	0.112434	-5.99462	2.03958e-09	1.89904e-07	Coding
Myh10	56.9915	1.14779	0.191627	5.98974	2.10178e-09	1.93716e-07	Coding
H2afj	3512.29	0.241651	0.0403817	5.98416	2.17506e-09	1.99185e-07	Coding
Ifi44l	1121.5	0.606654	0.101407	5.98236	2.19929e-09	2.00122e-07	Coding
Rnasel	193.3	1.02406	0.171295	5.97837	2.25378e-09	2.02039e-07	Coding
Inpp5j	78.0947	1.5579	0.2606	5.97814	2.25697e-09	2.02039e-07	Coding
Upp1	1241.78	1.19296	0.199568	5.97772	2.26279e-09	2.02039e-07	Coding
Cxcl10	5209.62	0.579955	0.0973954	5.95464	2.60642e-09	2.31275e-07	Coding
Ifi204	2058.86	0.56295	0.0946827	5.94564	2.75372e-09	2.42837e-07	Coding
9930111J21Rik2	642.611	0.540086	0.0908591	5.94422	2.77779e-09	2.43457e-07	Coding
Crlf2	1124.68	0.342741	0.0578435	5.92531	3.11703e-09	2.71524e-07	Coding
Sod2	3241.02	1.12418	0.190215	5.91003	3.42044e-09	2.96148e-07	Coding
Sp110	1227.47	0.313981	0.0531508	5.90737	3.47611e-09	2.99155e-07	Coding
Mzb1	19.8147	7.98776	1.35454	5.89702	3.70136e-09	3.16632e-07	Coding
Themis2	582.502	0.552371	0.0937706	5.89066	3.84654e-09	3.27093e-07	Coding
Prr5l	183.252	0.719173	0.122407	5.87524	4.22219e-09	3.56913e-07	Coding
Clec4e	1560.98	1.05625	0.179828	5.87364	4.26322e-09	3.58261e-07	Coding
Stx11	211.402	1.05088	0.179015	5.87033	4.34936e-09	3.63363e-07	Coding
Tgtp2	118.753	0.720124	0.122701	5.86893	4.38617e-09	3.64307e-07	Coding
Gm9733	82.6755	1.51663	0.258686	5.8628	4.55121e-09	3.7583e-07	Predicted
Cd274	1747.65	1.14498	0.195342	5.86139	4.59007e-09	3.76861e-07	Coding
Tnfaip6	74.0767	1.86331	0.318008	5.85933	4.6474e-09	3.79387e-07	Coding
Pim1	2593.38	0.909025	0.155423	5.84871	4.95407e-09	4.02124e-07	Coding
Cd300a	657.494	1.25393	0.214851	5.83626	5.3384e-09	4.30873e-07	Coding
Junb	5972.01	0.892087	0.152907	5.8342	5.40504e-09	4.338e-07	Coding
Cxcl9	11518.2	0.888174	0.152265	5.83308	5.44142e-09	4.3428e-07	Coding
Gm12933	60.665	-0.936008	0.160604	-5.82805	5.60785e-09	4.45076e-07	Predicted
Uchl3	406.29	-0.593115	0.101813	-5.82556	5.69215e-09	4.49271e-07	Coding
Pde4b	442.823	1.15298	0.198328	5.81347	6.11912e-09	4.80317e-07	Coding
Tarm1	175.476	1.34792	0.23227	5.80323	6.50479e-09	5.078e-07	Coding
Igsf6	1548.08	0.561784	0.096849	5.80062	6.60718e-09	5.10217e-07	Coding
Nop56	621.6	-0.65741	0.113322	-5.80123	6.58284e-09	5.10217e-07	Coding
Ifi202b	1880.48	0.539088	0.0931226	5.78901	7.08005e-09	5.43794e-07	Coding
B2m	44338.4	0.318758	0.0551537	5.77945	7.49464e-09	5.70224e-07	Coding
Enpp4	104.932	0.900411	0.155801	5.77924	7.504e-09	5.70224e-07	Coding
Sulf2	108.99	-0.854902	0.148029	-5.77525	7.68408e-09	5.80819e-07	Coding
Trim12c	389.771	0.419098	0.0725906	5.77345	7.76642e-09	5.83953e-07	Coding
Tmem140	370.725	1.05419	0.182769	5.76789	8.02692e-09	6.0038e-07	Coding
Cd52	19661.2	0.340657	0.0591215	5.76199	8.31274e-09	6.1852e-07	Coding
Cd86	1262.66	0.617391	0.10717	5.76085	8.36903e-09	6.19482e-07	Coding
Gm28875	96.4236	-0.886894	0.154161	-5.75305	8.76466e-09	6.45422e-07	Predicted
Dbnl	1616.44	0.324751	0.0564866	5.74917	8.96846e-09	6.55413e-07	Coding
Xdh	365.538	0.816675	0.142062	5.74872	8.99209e-09	6.55413e-07	Coding
Pla2g7	4527.63	0.815624	0.142023	5.74289	9.30738e-09	6.68985e-07	Coding
Tchh	50.9468	1.34299	0.233861	5.74268	9.31878e-09	6.68985e-07	Coding
Slc44a1	88.8985	-0.788844	0.137332	-5.74407	9.24271e-09	6.68985e-07	Coding
Pkib	496.437	0.632482	0.110183	5.74027	9.45247e-09	6.71831e-07	Coding
Rilpl2	727.876	0.558352	0.0972622	5.74069	9.42929e-09	6.71831e-07	Coding
Gm9625	135.222	-0.642739	0.112158	-5.73067	1.00033e-08	7.06982e-07	Predicted
Mkrn1	1381.71	0.437309	0.0763199	5.72995	1.0046e-08	7.06982e-07	Coding
Rbm7	731.978	0.453116	0.0792108	5.72038	1.06288e-08	7.44329e-07	Coding
Pmaip1	234.045	1.19071	0.208284	5.71674	1.08587e-08	7.56719e-07	Coding
Gm26532	108.275	1.60551	0.281034	5.71285	1.11097e-08	7.6827e-07	Predicted
Itgal	812.824	0.545582	0.0955064	5.71251	1.1132e-08	7.6827e-07	Coding
Hcst	515.612	0.409403	0.0717032	5.70969	1.1318e-08	7.77348e-07	Coding
Nop58	731.931	-0.696968	0.122209	-5.7031	1.17648e-08	8.04174e-07	Coding
Serpina3f	41.9388	1.88764	0.331096	5.70119	1.18976e-08	8.09377e-07	Coding
Ap1s2	525.014	0.422561	0.074267	5.68975	1.27223e-08	8.61377e-07	Coding
Selenom	2065.26	1.00175	0.176594	5.67262	1.40633e-08	9.47683e-07	Coding
Hcar2	390.751	0.991812	0.174892	5.67101	1.41961e-08	9.52137e-07	Coding
Ciita	244.731	0.909748	0.160588	5.66509	1.46946e-08	9.80966e-07	Coding
Rps2-ps6	20.876	-1.58267	0.279474	-5.66303	1.48722e-08	9.88207e-07	Ribosomal
Sema4a	582.005	0.835917	0.147858	5.6535	1.57217e-08	1.03981e-06	Coding
Pnrc1	1427.34	0.654223	0.116034	5.63819	1.71849e-08	1.13135e-06	Coding
Lamp2	2985.29	0.377475	0.0670198	5.63229	1.77832e-08	1.16537e-06	Coding
Rnaset2a	927.157	0.570587	0.101427	5.62558	1.8489e-08	1.20609e-06	Coding
Pls3	164.666	-0.811461	0.144268	-5.62469	1.85846e-08	1.20681e-06	Coding
Srsf7	1347.49	-0.432736	0.077025	-5.61812	1.93047e-08	1.24791e-06	Coding
Exosc2	189.03	-0.688147	0.122513	-5.61693	1.94375e-08	1.25083e-06	Coding
Jaml	989.78	0.973499	0.173463	5.61214	1.99836e-08	1.2802e-06	Coding
Lmo4	1137.9	0.578301	0.103104	5.60889	2.03631e-08	1.29725e-06	Coding
Bcl3	276.352	0.793291	0.141467	5.60759	2.05158e-08	1.29725e-06	Coding
Gm4366	124.2	-0.741141	0.132169	-5.60754	2.05222e-08	1.29725e-06	Predicted
Adora2a	32.5324	2.48948	0.444355	5.60247	2.11321e-08	1.32992e-06	Coding
Iglc3	34.0665	7.15087	1.27923	5.58997	2.27113e-08	1.41067e-06	Coding
Bcl10	650.631	0.432703	0.0773983	5.59061	2.2628e-08	1.41067e-06	Coding
N4bp2l1	108.145	1.03723	0.185537	5.59044	2.26501e-08	1.41067e-06	Coding
Gart	264.548	-0.550255	0.098694	-5.57537	2.47008e-08	1.5276e-06	Coding
Dhfr	274.148	-0.635925	0.114109	-5.57296	2.50453e-08	1.54223e-06	Coding
Snx20	1078.78	0.426498	0.0768364	5.55073	2.84483e-08	1.74426e-06	Coding
Pfkfb3	535.302	0.674654	0.121606	5.54788	2.89155e-08	1.76533e-06	Coding
Gm43181	301.437	0.898448	0.162041	5.54458	2.94666e-08	1.79132e-06	Predicted
1110038F14Rik	525.208	0.52936	0.0955386	5.5408	3.01088e-08	1.81873e-06	Coding
Gm6576	63.0611	-1.06321	0.1919	-5.54044	3.01721e-08	1.81873e-06	Predicted
Ptgs2os2	92.8611	0.776406	0.140319	5.53314	3.14547e-08	1.88808e-06	Noncoding
Rps19-ps6	638.973	-0.434144	0.078548	-5.52711	3.2554e-08	1.94588e-06	Ribosomal
Cd83	757.203	0.931621	0.168706	5.52217	3.34835e-08	1.99311e-06	Coding
Nfkbie	456.513	0.940782	0.170444	5.5196	3.39769e-08	2.01408e-06	Coding
Kcnq1ot1	779.989	-0.500645	0.09073	-5.51797	3.42943e-08	2.0245e-06	Noncoding
Jund	3312.3	0.758277	0.13757	5.51193	3.54921e-08	2.08659e-06	Coding
Hsd17b10	791.203	-0.554524	0.100646	-5.50966	3.59537e-08	2.10506e-06	Coding
Sec61g	896.365	-0.277771	0.0504433	-5.5066	3.65823e-08	2.13312e-06	Coding
Mthfsl	378.731	0.458722	0.0833876	5.50108	3.77479e-08	2.19214e-06	Coding
Tnfaip3	333.859	1.1037	0.200746	5.49798	3.84158e-08	2.2219e-06	Coding
Ccl5	9362.14	2.3659	0.430981	5.48957	4.02908e-08	2.32094e-06	Coding
Nucks1	1574.59	-0.509156	0.0928131	-5.48582	4.11549e-08	2.3612e-06	Coding
Snap23	898.884	0.349835	0.0638363	5.48019	4.2488e-08	2.42793e-06	Coding
Fahd1	90.152	-0.86663	0.158176	-5.47891	4.27965e-08	2.43582e-06	Coding
Cux1	715.778	-0.372943	0.0681459	-5.47271	4.43196e-08	2.5125e-06	Coding
Dnase1l3	323.911	1.81705	0.332085	5.47164	4.45887e-08	2.51777e-06	Coding
Kdm7a	703.12	0.731643	0.133875	5.46513	4.62555e-08	2.6016e-06	Coding
Nlrc5	302.478	0.611794	0.112098	5.45769	4.82367e-08	2.70239e-06	Coding
Cebpb	10029.3	0.848811	0.155702	5.4515	4.99458e-08	2.78721e-06	Coding
Fpr2	577.999	1.09768	0.201582	5.44535	5.17046e-08	2.87413e-06	Coding
H2-Oa	54.3357	2.09715	0.385411	5.44133	5.28833e-08	2.92826e-06	Coding
C1ra	80.6329	1.0294	0.189565	5.43034	5.6248e-08	3.09275e-06	Coding
Hif1a	1585.55	0.914516	0.168413	5.43021	5.62869e-08	3.09275e-06	Coding
Il18	343.16	0.646891	0.119371	5.41916	5.98801e-08	3.27757e-06	Coding
Gzmf	9.60735	3.10065	0.572305	5.41783	6.03251e-08	3.28933e-06	Coding
Csrnp1	401.15	1.21515	0.224385	5.41548	6.11253e-08	3.32029e-06	Coding
Arrdc4	479.11	0.727121	0.134381	5.41088	6.27153e-08	3.39375e-06	Coding
Lrrc8c	348.709	0.654656	0.121048	5.40823	6.36511e-08	3.4314e-06	Coding
Slc31a1	859.778	0.49279	0.0911512	5.40629	6.43447e-08	3.44466e-06	Coding
Mgst1	1783.85	1.55577	0.287811	5.40552	6.46205e-08	3.44466e-06	Coding
Eef1g	4038.3	-0.424193	0.0784678	-5.40595	6.4466e-08	3.44466e-06	Coding
Gm2000	198.741	-0.544588	0.100862	-5.39933	6.68897e-08	3.53998e-06	Predicted
Psmb10	3497.01	0.308923	0.0572155	5.39929	6.69042e-08	3.53998e-06	Coding
Map3k8	259.565	0.887302	0.164512	5.39356	6.90768e-08	3.64144e-06	Coding
Ralgds	310.904	1.18666	0.220269	5.38735	7.15041e-08	3.75554e-06	Coding
Mir142hg	34.4395	1.48599	0.276148	5.38116	7.40082e-08	3.87283e-06	Noncoding
H2-D1	58916.3	0.530954	0.0987034	5.37929	7.47813e-08	3.899e-06	Coding
Tapbp	2965.39	0.42469	0.0790286	5.37388	7.70596e-08	4.00318e-06	Coding
Unc93b1	4633.92	0.381073	0.0709295	5.37256	7.76246e-08	4.01792e-06	Coding
Tpcn1	72.7971	-0.838608	0.156134	-5.37109	7.82615e-08	4.03626e-06	Coding
Lsm2	654.787	-0.517351	0.0964182	-5.3657	8.06361e-08	4.14376e-06	Coding
H2-DMb1	7974.55	0.585693	0.109236	5.36171	8.24364e-08	4.17857e-06	Coding
Psmb9	6013.7	0.481857	0.0898824	5.36097	8.27758e-08	4.17857e-06	Coding
Nampt	1993.04	0.653935	0.121976	5.36118	8.26779e-08	4.17857e-06	Coding
Htra3	90.1255	-1.45691	0.271699	-5.36222	8.22045e-08	4.17857e-06	Coding
Fam89a	30.2929	1.27308	0.237359	5.36352	8.16174e-08	4.17857e-06	Coding
Sectm1a	424.312	0.78369	0.146264	5.35805	8.41241e-08	4.23168e-06	Coding
Hist1h3e	52.702	-1.12063	0.209412	-5.35131	8.73209e-08	4.37707e-06	Coding
Syf2	904.353	0.32549	0.0609915	5.33664	9.46858e-08	4.72965e-06	Coding
Max	705.775	0.379738	0.0711858	5.33447	9.58266e-08	4.76996e-06	Coding
Btg1	6198.72	0.637322	0.119508	5.33287	9.66716e-08	4.79531e-06	Coding
Tpd52	2735.23	0.3415	0.064071	5.33002	9.82002e-08	4.85429e-06	Coding
Ivns1abp	653.148	-0.611413	0.114858	-5.32322	1.01945e-07	5.02201e-06	Coding
Evi2a	1374.41	0.295996	0.0556307	5.32072	1.03356e-07	5.07404e-06	Coding
Gm10073	724.271	-0.391649	0.0736256	-5.31946	1.04073e-07	5.09173e-06	Predicted
Ccar1	636.48	-0.320304	0.060235	-5.31757	1.05162e-07	5.10485e-06	Coding
Shmt2	227.755	-0.947576	0.178287	-5.31488	1.06728e-07	5.10485e-06	Coding
Rasgrp2	123.906	1.26362	0.237755	5.31481	1.06768e-07	5.10485e-06	Coding
Gpd2	364.302	0.751518	0.141404	5.31468	1.06842e-07	5.10485e-06	Coding
Il1b	9195.22	1.46673	0.275882	5.31651	1.05777e-07	5.10485e-06	Coding
Plgrkt	1199.8	0.438603	0.0824921	5.31691	1.05544e-07	5.10485e-06	Coding
Golm1	200.969	-0.850065	0.159901	-5.31619	1.05964e-07	5.10485e-06	Coding
Prr13	1557.97	0.477326	0.0898262	5.31388	1.07316e-07	5.11037e-06	Coding
Gbp9	358.888	0.701052	0.13195	5.31299	1.07839e-07	5.11825e-06	Coding
Pirb	934.543	0.772834	0.145806	5.30042	1.15537e-07	5.43492e-06	Coding
Gm6377	297.112	0.591346	0.11157	5.30024	1.15653e-07	5.43492e-06	Predicted
Litaf	1789.03	0.50144	0.0945988	5.3007	1.15361e-07	5.43492e-06	Coding
Sms	464.838	-0.50306	0.0950759	-5.29115	1.21552e-07	5.69342e-06	Coding
Pdcd1lg2	282.292	2.06242	0.390072	5.28729	1.24145e-07	5.79587e-06	Coding
Cox6a2	84.46	3.25513	0.615938	5.28483	1.25821e-07	5.85496e-06	Coding
Htr7	117.166	1.02305	0.193856	5.27735	1.31064e-07	6.07914e-06	Coding
Gm9294	249.839	-0.505737	0.0958845	-5.27444	1.33165e-07	6.15661e-06	Predicted
Trip6	100.428	-1.49558	0.283726	-5.27121	1.35525e-07	6.2455e-06	Coding
C1rl	115.077	1.01695	0.193234	5.26277	1.41899e-07	6.51824e-06	Coding
Filip1l	263.671	0.60373	0.114769	5.26039	1.43752e-07	6.58218e-06	Coding
Nsd2	752.712	-0.725689	0.138119	-5.25409	1.48755e-07	6.78951e-06	Coding
Ilf2	330.388	-0.528131	0.100618	-5.24887	1.53035e-07	6.94051e-06	Coding
Klf6	3010.69	0.595594	0.113468	5.24899	1.52937e-07	6.94051e-06	Coding
Rai14	285.491	-0.659307	0.125652	-5.24708	1.5453e-07	6.98613e-06	Coding
Il15ra	138.247	0.951001	0.18133	5.24458	1.56636e-07	7.059e-06	Coding
Tars	289.154	-0.407538	0.0777303	-5.24298	1.58005e-07	7.09828e-06	Coding
Mir22hg	303.151	0.986158	0.188233	5.23904	1.61417e-07	7.18582e-06	Noncoding
Relb	298.7	0.82854	0.158123	5.23986	1.60701e-07	7.18582e-06	Coding
Ccr9	29.1343	4.81064	0.918239	5.23899	1.61462e-07	7.18582e-06	Coding
B3gnt5	165.225	1.36561	0.26099	5.23243	1.67293e-07	7.42222e-06	Coding
Dram1	337.214	1.10971	0.212169	5.23032	1.69216e-07	7.48426e-06	Coding
Cfb	172.45	0.994575	0.190386	5.22399	1.7511e-07	7.72104e-06	Coding
Trps1	1079.1	0.363132	0.0695346	5.22232	1.76696e-07	7.76703e-06	Coding
Dtx4	116.497	-0.934646	0.17903	-5.22061	1.78337e-07	7.81512e-06	Coding
Cyba	19329.7	0.421504	0.0808795	5.21151	1.87312e-07	8.18329e-06	Coding
Gm10260	6900.86	-0.518972	0.0996875	-5.20599	1.92961e-07	8.40441e-06	Predicted
Cisd2	1042.18	0.40593	0.0781254	5.19588	2.03759e-07	8.80284e-06	Coding
Ms4a6c	7644.61	0.37086	0.0713702	5.19629	2.03306e-07	8.80284e-06	Coding
Ric1	170.738	0.934133	0.17979	5.19569	2.03958e-07	8.80284e-06	Coding
Dnmt1	357.272	-0.477422	0.0919663	-5.19127	2.08863e-07	8.98741e-06	Coding
Atf3	2901.71	0.785315	0.151388	5.18742	2.13222e-07	9.14743e-06	Coding
Gpr141	780.113	0.733646	0.141454	5.18646	2.14333e-07	9.16753e-06	Coding
Hspd1	1893.71	-0.479507	0.0924823	-5.18485	2.16186e-07	9.21922e-06	Coding
H2-M3	920.961	0.274796	0.0530337	5.18153	2.20071e-07	9.35694e-06	Coding
Arpc3	8548.9	0.187951	0.036293	5.17871	2.23427e-07	9.47144e-06	Coding
Gadd45b	1224.78	1.11863	0.216121	5.17594	2.2677e-07	9.58471e-06	Coding
Tmem59	2028.12	0.220312	0.0425946	5.1723	2.31231e-07	9.71999e-06	Coding
Ppt2	769.917	0.80851	0.156321	5.1721	2.31473e-07	9.71999e-06	Coding
Ly6e	12457.5	0.375897	0.0726839	5.17167	2.32011e-07	9.71999e-06	Coding
Fpr1	114.023	1.62087	0.313699	5.16694	2.37955e-07	9.93986e-06	Coding
Tnfaip2	1402.85	1.74424	0.337666	5.16557	2.39701e-07	9.95457e-06	Coding
Tmem106a	1298.86	0.383414	0.0742235	5.16566	2.39587e-07	9.95457e-06	Coding
C1galt1c1	279.367	0.552127	0.106973	5.16138	2.45134e-07	1.01507e-05	Coding
Bcl2l11	469.318	0.794072	0.153866	5.16081	2.45878e-07	1.01521e-05	Coding
Atad3a	220.188	-0.566383	0.109935	-5.15197	2.5776e-07	1.0612e-05	Coding
Cd302	1216.55	0.760229	0.147671	5.14814	2.63076e-07	1.07997e-05	Coding
Nufip1	488.839	0.621431	0.12074	5.14687	2.64866e-07	1.08421e-05	Coding
Rplp0-ps1	183.632	-0.663292	0.128914	-5.14521	2.67227e-07	1.09074e-05	Ribosomal
Tnp2	13.6494	1.96903	0.382798	5.14378	2.69262e-07	1.09592e-05	Coding
Rhou	65.0343	1.25344	0.243753	5.14226	2.71454e-07	1.09858e-05	Coding
Tgfbi	11446.1	-0.424897	0.0826251	-5.14247	2.71148e-07	1.09858e-05	Coding
Ly6c1	1823.05	1.40723	0.273768	5.14022	2.74418e-07	1.10744e-05	Coding
Klf2	1408.69	1.0641	0.207116	5.13768	2.78149e-07	1.11934e-05	Coding
Gpr132	308.014	1.30095	0.253257	5.1369	2.79312e-07	1.12086e-05	Coding
Gnl3	342.386	-0.433665	0.0844615	-5.13447	2.82942e-07	1.13224e-05	Coding
Mcl1	6664.42	0.520518	0.101421	5.13227	2.86276e-07	1.14238e-05	Coding
Ptpn18	5111.16	0.250697	0.0488645	5.13045	2.89044e-07	1.15022e-05	Coding
Ifitm1	5677.85	0.555332	0.108279	5.12871	2.91733e-07	1.1577e-05	Coding
Pi16	61.6622	1.00968	0.19691	5.12763	2.9341e-07	1.16112e-05	Coding
Gm15987	99.938	1.04071	0.203013	5.1263	2.95497e-07	1.16615e-05	Predicted
Psmb8	12126.5	0.31753	0.0619855	5.12265	3.01276e-07	1.17918e-05	Coding
Bst1	1451.49	0.917882	0.179146	5.12365	2.9967e-07	1.17918e-05	Coding
Dusp5	369.06	1.19882	0.23402	5.12272	3.01165e-07	1.17918e-05	Coding
Gm4841	35.8424	1.51373	0.29553	5.12207	3.02194e-07	1.17955e-05	Predicted
Il12rb1	119.345	0.689278	0.134623	5.12004	3.05469e-07	1.18908e-05	Coding
C3	1424.41	1.61716	0.31633	5.11225	3.18344e-07	1.23583e-05	Coding
Acin1	703.204	-0.306047	0.0598741	-5.11151	3.19599e-07	1.23734e-05	Coding
A930007I19Rik	129.275	0.87904	0.172001	5.11067	3.21012e-07	1.23945e-05	Noncoding
Tmbim6	4824.84	0.299813	0.0587008	5.10747	3.26506e-07	1.25727e-05	Coding
Gbp11	57.7987	1.79363	0.352006	5.09545	3.47914e-07	1.3361e-05	Coding
Agap1	170.452	-0.992586	0.194848	-5.09415	3.50301e-07	1.34166e-05	Coding
Lyz2	129154	0.777736	0.152732	5.09216	3.53998e-07	1.34859e-05	Coding
Hmgb1	2744.2	-0.468836	0.0920618	-5.09262	3.5314e-07	1.34859e-05	Coding
Il10ra	585.226	0.464986	0.0913342	5.09104	3.56108e-07	1.35302e-05	Coding
Cytip	836.101	1.16044	0.228036	5.08885	3.60235e-07	1.36507e-05	Coding
Mrps18b	476.808	-0.44119	0.086732	-5.08682	3.64127e-07	1.37335e-05	Coding
Klk1b27	18.7454	7.91007	1.55505	5.0867	3.64343e-07	1.37335e-05	Coding
AC154305.3	40.4702	2.19334	0.431466	5.08345	3.70634e-07	1.39339e-05	Noncoding
Atp1b1	36.1907	5.50913	1.08426	5.081	3.75453e-07	1.4078e-05	Coding
Gm12216	52.3997	1.25619	0.247429	5.07699	3.8346e-07	1.43406e-05	Predicted
Arfgef3	25.8514	-1.31911	0.260002	-5.07345	3.90668e-07	1.4572e-05	Coding
Ier3	3274.3	0.893707	0.176208	5.07189	3.93891e-07	1.4654e-05	Coding
Prtn3	64.9545	2.61767	0.516313	5.06993	3.9797e-07	1.4729e-05	Coding
Il2rg	933.349	0.714793	0.140974	5.07039	3.96995e-07	1.4729e-05	Coding
Selenow	4453.53	0.259803	0.051254	5.06892	4.00071e-07	1.47685e-05	Coding
Grwd1	130.723	-0.652773	0.128794	-5.06834	4.01302e-07	1.47758e-05	Coding
Nlrp3	506.233	0.619919	0.12239	5.06513	4.08121e-07	1.49882e-05	Coding
Lars	458.734	-0.436175	0.0861499	-5.06297	4.1277e-07	1.51201e-05	Coding
Rpl36a-ps2	367.103	-0.562073	0.111033	-5.06221	4.14428e-07	1.5142e-05	Ribosomal
Cd47	2998.98	0.475347	0.0939454	5.05982	4.19655e-07	1.52939e-05	Coding
Rpl38	16290.3	-0.293222	0.0579896	-5.05647	4.2709e-07	1.54858e-05	Ribosomal
Sppl2a	1348.82	0.42046	0.0831458	5.0569	4.26123e-07	1.54858e-05	Coding
Phgdh	30.4931	-1.17569	0.232899	-5.04807	4.46299e-07	1.61413e-05	Coding
Hdc	81.1413	1.54721	0.306619	5.04602	4.5111e-07	1.62741e-05	Coding
Asns	136.768	-0.92549	0.183556	-5.04201	4.60663e-07	1.65769e-05	Coding
Slco3a1	282.27	0.90476	0.179682	5.03532	4.77039e-07	1.71231e-05	Coding
Usp14	579.063	-0.362585	0.0721558	-5.02504	5.03332e-07	1.79765e-05	Coding
2210406H18Rik	55.3639	0.851661	0.169475	5.0253	5.02658e-07	1.79765e-05	Noncoding
Arid5b	539.464	0.683877	0.136148	5.02304	5.08608e-07	1.80561e-05	Coding
Tnfrsf1a	1075.24	0.467307	0.0930374	5.02278	5.09278e-07	1.80561e-05	Coding
Stat2	500.982	0.461229	0.0918279	5.02276	5.09352e-07	1.80561e-05	Coding
H2-Q4	1064.17	0.387218	0.0771512	5.01895	5.19539e-07	1.83716e-05	Coding
Npc2	19838.5	0.409466	0.0816329	5.01595	5.27734e-07	1.86153e-05	Coding
Mcm5	421.134	-0.757425	0.151086	-5.01321	5.35302e-07	1.88358e-05	Coding
Ahr	302.723	0.950939	0.189837	5.00924	5.46449e-07	1.91808e-05	Coding
Bcl11a	36.0953	2.21341	0.442656	5.00029	5.72434e-07	2.00285e-05	Coding
Ctss	31316	0.347252	0.0694508	4.99997	5.73403e-07	2.00285e-05	Coding
Fis1	1840.16	0.365759	0.0732074	4.99621	5.84691e-07	2.03729e-05	Coding
St3gal4	273.321	0.699959	0.140127	4.99517	5.87846e-07	2.03834e-05	Coding
9930120I10Rik	101.861	0.894689	0.179108	4.99525	5.87602e-07	2.03834e-05	Noncoding
Gm42462	60.3307	0.924553	0.185142	4.99375	5.92171e-07	2.04837e-05	Predicted
Gm38236	116.765	0.975609	0.195423	4.99228	5.96694e-07	2.05903e-05	Predicted
Fkbp4	572.09	-0.55169	0.110543	-4.99074	6.01478e-07	2.07053e-05	Coding
Nfe2l2	1330.99	0.713521	0.143228	4.98173	6.30179e-07	2.16412e-05	Coding
Acsl1	467.777	0.788443	0.158391	4.97782	6.43043e-07	2.203e-05	Coding
Idnk	937.037	0.259486	0.0521658	4.97426	6.54989e-07	2.23245e-05	Coding
Fxn	163.159	-0.690214	0.138768	-4.97386	6.56328e-07	2.23245e-05	Coding
Npm3	596.509	-0.471031	0.0946993	-4.97397	6.55968e-07	2.23245e-05	Coding
Ptpn2	448.796	0.382882	0.0770102	4.97183	6.63226e-07	2.25056e-05	Coding
Taldo1	5125.52	0.352639	0.0709415	4.97085	6.66609e-07	2.25668e-05	Coding
Rrm1	410.462	-0.821345	0.16534	-4.96761	6.77819e-07	2.2838e-05	Coding
Gadd45a	212.534	0.946377	0.190495	4.96799	6.76519e-07	2.2838e-05	Coding
Plekho2	662.696	0.698938	0.140824	4.96319	6.93443e-07	2.33095e-05	Coding
Ect2	74.7656	-0.964317	0.19433	-4.96227	6.9673e-07	2.3365e-05	Coding
Tax1bp1	1797.03	0.536918	0.108431	4.95173	7.35578e-07	2.44953e-05	Coding
Rab20	574.126	0.870215	0.175727	4.95209	7.3422e-07	2.44953e-05	Coding
Pa2g4	1317.58	-0.704309	0.142219	-4.95227	7.33512e-07	2.44953e-05	Coding
Ubl3	1112.69	0.423536	0.085565	4.94988	7.42607e-07	2.46718e-05	Coding
Asah1	1979.82	0.279202	0.0564215	4.9485	7.47862e-07	2.47888e-05	Coding
Pla2g16	2602.66	0.417509	0.0844424	4.94431	7.64148e-07	2.52699e-05	Coding
Psme2	5760.45	0.422565	0.0854727	4.94386	7.65914e-07	2.52699e-05	Coding
Pdlim4	429.865	0.622027	0.125833	4.94329	7.6817e-07	2.52859e-05	Coding
Gla	648.01	0.647407	0.130998	4.94212	7.72787e-07	2.53794e-05	Coding
Rapgef2	202.61	0.509444	0.103126	4.94	7.81221e-07	2.55975e-05	Coding
Idh2	561.926	-0.607736	0.12322	-4.9321	8.13485e-07	2.65937e-05	Coding
Itgb7	1342.33	0.593055	0.120258	4.93152	8.15923e-07	2.66125e-05	Coding
Uba52	1199.97	-0.339011	0.0687618	-4.93023	8.21342e-07	2.67282e-05	Coding
Cspg4	25.8245	-1.62342	0.329509	-4.92678	8.35938e-07	2.71414e-05	Coding
Map1lc3b	2208.86	0.285612	0.0579829	4.9258	8.40145e-07	2.72161e-05	Coding
Dnph1	138.418	-1.07239	0.217765	-4.92453	8.45643e-07	2.73322e-05	Coding
Ncl	3460.91	-0.592743	0.120378	-4.92399	8.4795e-07	2.7345e-05	Coding
AI413582	549.67	0.404577	0.0821799	4.92306	8.51999e-07	2.74137e-05	Coding
Gm37747	85.531	0.978994	0.199017	4.91916	8.69184e-07	2.79037e-05	Predicted
F3	41.1649	1.10315	0.224336	4.91738	8.77118e-07	2.80953e-05	Coding
Snrpa1	888.537	-0.466593	0.094908	-4.91626	8.82113e-07	2.8174e-05	Coding
Gm5921	78.3932	-0.737647	0.150052	-4.91595	8.83519e-07	2.8174e-05	Predicted
Ncf2	1678.8	0.309757	0.0630191	4.91529	8.86528e-07	2.81762e-05	Coding
Tlr11	18.5755	2.40864	0.490053	4.91506	8.87533e-07	2.81762e-05	Coding
Aoah	239.829	1.02857	0.209325	4.91377	8.93398e-07	2.82995e-05	Coding
Rnaseh2c	576.687	-0.396599	0.080737	-4.91224	9.00439e-07	2.84595e-05	Coding
Mybbp1a	477.559	-0.435627	0.0887175	-4.91027	9.09509e-07	2.86785e-05	Coding
Glipr2	333.9	1.1769	0.2397	4.90987	9.11386e-07	2.86785e-05	Coding
Ipo5	398.414	-0.611543	0.124568	-4.9093	9.14019e-07	2.86982e-05	Coding
Tgif1	664.36	0.686763	0.139996	4.90559	9.31476e-07	2.91821e-05	Coding
Entpd1	990.495	0.426527	0.0869916	4.90308	9.43458e-07	2.94647e-05	Coding
Gpcpd1	251.785	1.01636	0.2073	4.90284	9.44619e-07	2.94647e-05	Coding
Wdr12	240.714	-0.529382	0.108004	-4.90151	9.51024e-07	2.95999e-05	Coding
Umps	272.637	-0.530641	0.108298	-4.89981	9.59306e-07	2.97927e-05	Coding
Mnd1	55.9426	-0.916949	0.187203	-4.89815	9.6743e-07	2.98503e-05	Coding
Gpsm3	2016.72	0.273653	0.055864	4.89856	9.65407e-07	2.98503e-05	Coding
U2af1	1337.75	-0.293174	0.0598533	-4.8982	9.67174e-07	2.98503e-05	Coding
Ly6i	617.437	1.67022	0.341047	4.89735	9.71379e-07	2.99076e-05	Coding
Cdk6	332.865	-0.587767	0.120037	-4.89656	9.75275e-07	2.9963e-05	Coding
Agtrap	475.183	0.803966	0.164221	4.89564	9.79887e-07	3.00401e-05	Coding
Cdkn1a	2075.11	0.793609	0.162162	4.89394	9.88388e-07	3.02358e-05	Coding
Col27a1	25.6549	-2.09143	0.42751	-4.89212	9.97552e-07	3.04509e-05	Coding
Gm8093	85.1171	0.756839	0.154755	4.89057	1.00543e-06	3.06259e-05	Predicted
Sirt2	652.491	0.358412	0.0733118	4.88888	1.01414e-06	3.08254e-05	Coding
C1qbp	1474.55	-0.544821	0.11157	-4.88323	1.04359e-06	3.16535e-05	Coding
Serpinb10	39.6596	1.97635	0.404894	4.88117	1.05461e-06	3.19198e-05	Coding
Parp1	471.887	-0.583107	0.119549	-4.87756	1.07408e-06	3.24405e-05	Coding
Eif3a	1943.77	-0.283894	0.0582298	-4.87541	1.08583e-06	3.27262e-05	Coding
Nfatc1	359.515	-0.962884	0.197711	-4.87016	1.11508e-06	3.3537e-05	Coding
Bcl2l14	26.2426	4.33483	0.890179	4.86962	1.11812e-06	3.35577e-05	Coding
Ubac2	426.038	0.454873	0.0934662	4.8667	1.13475e-06	3.39854e-05	Coding
Ptprcap	18.587	3.36313	0.691113	4.86624	1.13739e-06	3.39933e-05	Coding
Rcc1	178.313	-0.67771	0.139353	-4.86327	1.15463e-06	3.44363e-05	Coding
Selenok	2543.32	0.305859	0.0630439	4.85152	1.22516e-06	3.64639e-05	Coding
Nob1	171.128	-0.533879	0.110168	-4.84604	1.2595e-06	3.73303e-05	Coding
Emb	1923.3	0.658689	0.135918	4.84622	1.25838e-06	3.73303e-05	Coding
Pdap1	1275.62	-0.346702	0.0715597	-4.84493	1.26656e-06	3.74619e-05	Coding
Hpcal1	841.114	0.380529	0.0786122	4.84058	1.29461e-06	3.82124e-05	Coding
Mak16	326.957	-0.518266	0.107081	-4.83993	1.29886e-06	3.82588e-05	Coding
D730003I15Rik	81.2599	0.711839	0.147107	4.83893	1.30543e-06	3.83731e-05	Noncoding
Mrps5	280.695	-0.419497	0.0867579	-4.83526	1.32972e-06	3.89271e-05	Coding
Ptpn1	2131.82	0.553818	0.114534	4.83542	1.32866e-06	3.89271e-05	Coding
Itga4	461.19	0.624912	0.129367	4.83055	1.36157e-06	3.97779e-05	Coding
Ly6a	14993.5	0.783566	0.162368	4.82586	1.394e-06	4.06421e-05	Coding
Srsf5	1496.47	0.312496	0.0647915	4.82311	1.41337e-06	4.10394e-05	Coding
Lmna	2732.54	-0.634364	0.131523	-4.82322	1.41262e-06	4.10394e-05	Coding
Apitd1	181.257	-0.673577	0.139773	-4.81907	1.44226e-06	4.17932e-05	Coding
Nup35	143.06	-0.548727	0.113902	-4.81755	1.4533e-06	4.20281e-05	Coding
Gm20186	103.724	0.886799	0.184092	4.81714	1.45627e-06	4.20289e-05	Predicted
Rcc2	571.646	-0.433507	0.0900564	-4.81373	1.4814e-06	4.25821e-05	Coding
Hmgb3	252.463	-0.950868	0.197518	-4.81409	1.47869e-06	4.25821e-05	Coding
Stx8	807.73	0.286143	0.0594586	4.81247	1.49073e-06	4.27643e-05	Coding
Gm38115	60.9766	0.948682	0.197185	4.81114	1.50074e-06	4.2965e-05	Predicted
Gm10224	60.5557	-0.767541	0.159598	-4.80921	1.51527e-06	4.32943e-05	Predicted
Bst2	4285.61	0.543291	0.113009	4.8075	1.52826e-06	4.35783e-05	Coding
Kpna2	129.844	-0.795012	0.165428	-4.80578	1.54149e-06	4.38679e-05	Coding
Cbx5	345.791	-0.694441	0.144516	-4.80529	1.54531e-06	4.38892e-05	Coding
Tyms	432.109	-0.916201	0.19073	-4.80365	1.55798e-06	4.41614e-05	Coding
Cd2ap	578.026	0.322883	0.0672552	4.80087	1.57979e-06	4.46909e-05	Coding
Lpin2	472.821	0.47338	0.0986505	4.79855	1.59815e-06	4.5121e-05	Coding
Set	2506.16	-0.425074	0.0885936	-4.79803	1.60237e-06	4.51508e-05	Coding
AC145731.1	17.0799	2.3578	0.491553	4.79664	1.61352e-06	4.53755e-05	Noncoding
Asf1b	390.97	-0.721959	0.150544	-4.79567	1.62131e-06	4.55051e-05	Coding
Gm14586	317.249	-0.482607	0.100665	-4.79421	1.63317e-06	4.5748e-05	Predicted
Metap2	1323.63	-0.295365	0.0616748	-4.78907	1.67556e-06	4.68437e-05	Coding
Myh9	1393.6	-0.262318	0.0548285	-4.78434	1.71552e-06	4.78142e-05	Coding
2310031A07Rik	74.7647	0.869234	0.18169	4.78417	1.71697e-06	4.78142e-05	Noncoding
Chmp4b	2430.68	0.359222	0.0751489	4.78013	1.75181e-06	4.86893e-05	Coding
Mis18bp1	145.589	-0.757816	0.158611	-4.77781	1.77212e-06	4.91584e-05	Coding
Iars	186.756	-0.503502	0.105505	-4.77229	1.82147e-06	5.04294e-05	Coding
Clec2d	836.416	0.717561	0.150394	4.7712	1.8313e-06	5.06033e-05	Coding
Hells	178.179	-0.782116	0.163967	-4.76996	1.84263e-06	5.08183e-05	Coding
Slpi	1617.68	2.39478	0.502927	4.76168	1.91992e-06	5.28478e-05	Coding
Dkc1	318.261	-0.590095	0.124007	-4.75855	1.9499e-06	5.35698e-05	Coding
Oser1	728.74	0.372287	0.0782987	4.7547	1.98739e-06	5.4495e-05	Coding
Stx7	1307.52	0.263802	0.0555251	4.75104	2.02372e-06	5.52788e-05	Coding
Pacsin1	10.747	4.58941	0.965957	4.75115	2.0226e-06	5.52788e-05	Coding
Aif1	11194.5	0.429538	0.0904346	4.74971	2.03713e-06	5.553e-05	Coding
Tnfrsf14	105.462	0.869007	0.182974	4.74935	2.04069e-06	5.553e-05	Coding
Snrpg	1911.45	-0.290232	0.0611518	-4.74609	2.07387e-06	5.63256e-05	Coding
Sae1	639.29	-0.518482	0.109286	-4.74424	2.09286e-06	5.6519e-05	Coding
Dpp4	40.9557	1.81798	0.383177	4.74449	2.09036e-06	5.6519e-05	Coding
Mad2l1	253.051	-0.634555	0.133736	-4.74485	2.08662e-06	5.6519e-05	Coding
Itm2c	1829.08	0.386282	0.0814514	4.74249	2.11111e-06	5.69043e-05	Coding
Fam32a	1454.01	0.510344	0.107647	4.74088	2.12787e-06	5.72481e-05	Coding
Ptgs1	144.418	-1.13937	0.240374	-4.74	2.13721e-06	5.73913e-05	Coding
2020-03-05	854.495	0.435994	0.0920779	4.73506	2.18988e-06	5.86953e-05	Coding
Vmp1	1453	0.354996	0.0749894	4.73394	2.20199e-06	5.89095e-05	Coding
Smpdl3b	853.932	0.45302	0.095746	4.73147	2.22895e-06	5.95191e-05	Coding
Tacstd2	20.863	1.78529	0.377399	4.73051	2.23958e-06	5.96915e-05	Coding
Gm37084	210.819	0.665936	0.140845	4.72815	2.26572e-06	5.99408e-05	Predicted
Nsun2	483.088	-0.31194	0.0659688	-4.7286	2.26069e-06	5.99408e-05	Coding
Ddx39	917.374	-0.477691	0.101022	-4.72857	2.26107e-06	5.99408e-05	Coding
Rpl14-ps1	149.191	-0.60203	0.127324	-4.72833	2.26373e-06	5.99408e-05	Ribosomal
Rtp4	1573.68	0.503676	0.106566	4.72643	2.28496e-06	6.03382e-05	Coding
Eef1e1	499.593	-0.551285	0.11673	-4.72272	2.32715e-06	6.1339e-05	Coding
Timm8a1	286.119	-0.602839	0.127729	-4.71966	2.36242e-06	6.21538e-05	Coding
Syncrip	661.001	-0.314757	0.0666994	-4.71904	2.3696e-06	6.22281e-05	Coding
Crebrf	166.172	0.682478	0.144751	4.71485	2.41889e-06	6.3406e-05	Coding
Tiparp	650.585	0.773813	0.164191	4.71288	2.44245e-06	6.39062e-05	Coding
Ppt1	2572.89	0.539335	0.114526	4.70929	2.48576e-06	6.49206e-05	Coding
B4galt1	649.213	-0.440515	0.0935655	-4.7081	2.5004e-06	6.50652e-05	Coding
Timm9	235.562	-0.521361	0.110736	-4.70813	2.49997e-06	6.50652e-05	Coding
Kdm6b	510.26	0.828569	0.176098	4.70515	2.53679e-06	6.58918e-05	Coding
Zfp36l1	1622.4	0.627912	0.133495	4.70363	2.55575e-06	6.6264e-05	Coding
Rrp15	285.641	-0.53134	0.113009	-4.70174	2.57951e-06	6.6759e-05	Coding
Rela	303.674	0.435048	0.0925473	4.70081	2.59129e-06	6.69424e-05	Coding
Gm45266	135.691	1.02329	0.21781	4.69808	2.62621e-06	6.77221e-05	Predicted
C1s1	28.8076	1.97936	0.421575	4.69514	2.66424e-06	6.8579e-05	Coding
Gm38235	40.8427	1.32547	0.28233	4.69477	2.66909e-06	6.85801e-05	Predicted
Cd38	562.079	1.02027	0.217615	4.68841	2.75338e-06	7.0619e-05	Coding
Gpr35	437.042	0.750229	0.160155	4.68438	2.80805e-06	7.1892e-05	Coding
Ptges3	1521.46	-0.286295	0.0611224	-4.68396	2.81381e-06	7.19107e-05	Coding
Nolc1	439.362	-0.544569	0.116334	-4.6811	2.85345e-06	7.27935e-05	Coding
Jun	4155.08	0.480131	0.102611	4.67914	2.88077e-06	7.33595e-05	Coding
AI839979	194.723	0.645341	0.137989	4.67675	2.91459e-06	7.38646e-05	Noncoding
5730508B09Rik	526.85	0.569797	0.121831	4.67693	2.91196e-06	7.38646e-05	Coding
Stfa2l1	34.1892	1.32916	0.284212	4.67664	2.91612e-06	7.38646e-05	Coding
Pnpla2	482.26	0.445592	0.0952922	4.67606	2.92439e-06	7.39432e-05	Coding
Mcur1	488.104	0.319975	0.0684507	4.67452	2.94636e-06	7.4367e-05	Coding
Stat3	820.616	0.451298	0.0966166	4.67102	2.99713e-06	7.55149e-05	Coding
Rabgap1l	77.5077	1.06313	0.22768	4.66942	3.02047e-06	7.59691e-05	Coding
Dtymk	689.794	-0.580925	0.124426	-4.66885	3.02895e-06	7.60486e-05	Coding
Lyst	179.508	0.814032	0.17439	4.66789	3.04306e-06	7.62688e-05	Coding
Akap7	133.106	0.722626	0.154846	4.66675	3.06008e-06	7.65608e-05	Coding
Nr4a2	393.249	1.10952	0.237804	4.66568	3.07605e-06	7.6826e-05	Coding
Gm9844	296.306	0.446052	0.0956257	4.66456	3.09277e-06	7.71087e-05	Predicted
Tmem176b	854.164	0.576297	0.123643	4.66099	3.14693e-06	7.83224e-05	Coding
Slamf7	328.747	1.71442	0.368385	4.65387	3.25767e-06	8.09375e-05	Coding
Clk4	240.829	0.598787	0.128703	4.65248	3.27966e-06	8.13423e-05	Coding
Hnrnpab	2131.83	-0.373195	0.0802239	-4.65191	3.28868e-06	8.14249e-05	Coding
Sri	2160.69	0.330077	0.0709969	4.64917	3.33278e-06	8.23739e-05	Coding
AC125149.3	154.361	0.722589	0.155486	4.64729	3.36318e-06	8.29817e-05	Coding
Parp10	285.014	0.585757	0.126057	4.64676	3.37185e-06	8.30521e-05	Coding
Grb2	2389.7	0.273511	0.0589111	4.64278	3.43753e-06	8.45243e-05	Coding
Apoc1	24.8257	1.54958	0.333798	4.64226	3.44611e-06	8.45895e-05	Coding
Arid5a	232.567	0.582575	0.125571	4.63942	3.49381e-06	8.56133e-05	Coding
Dnajc2	886.592	-0.322494	0.0695917	-4.63409	3.58514e-06	8.75511e-05	Coding
Cdc7	56.4825	-0.827645	0.178596	-4.63417	3.58376e-06	8.75511e-05	Coding
Cebpd	766.559	0.321622	0.0694195	4.63303	3.60357e-06	8.78503e-05	Coding
Ssrp1	981.199	-0.398427	0.0860035	-4.63268	3.6097e-06	8.78503e-05	Coding
Letm1	493.811	-0.521392	0.112585	-4.6311	3.63734e-06	8.83725e-05	Coding
Gm5292	46.3425	-0.911042	0.196762	-4.63017	3.65358e-06	8.85127e-05	Predicted
Gm43814	33.6053	1.46357	0.316111	4.62992	3.65807e-06	8.85127e-05	Predicted
Cenpm	174.433	-0.831269	0.179551	-4.62971	3.6617e-06	8.85127e-05	Coding
Art2a-ps	34.323	2.0255	0.437658	4.62805	3.69129e-06	8.90773e-05	Coding
Map4k1	157.697	0.574839	0.124221	4.62754	3.70026e-06	8.91433e-05	Coding
Rasgrp4	142.519	0.724077	0.156499	4.62673	3.7149e-06	8.93453e-05	Coding
Ndufaf4	232.937	-0.545756	0.117976	-4.62601	3.7278e-06	8.95048e-05	Coding
Hilpda	1488.76	0.82753	0.178929	4.6249	3.74776e-06	8.98331e-05	Coding
Ptprc	3111.13	0.417932	0.0904183	4.62221	3.79671e-06	9.08539e-05	Coding
Tmbim4	1919.75	0.32899	0.0711863	4.62154	3.80909e-06	9.09978e-05	Coding
Serbp1	3965.85	-0.378864	0.0819848	-4.62115	3.81611e-06	9.10134e-05	Coding
Cct5	2161.47	-0.361073	0.0781481	-4.62037	3.83057e-06	9.12059e-05	Coding
Csf2rb	1142.27	0.681854	0.147649	4.61807	3.87332e-06	9.20702e-05	Coding
Cep57	230.405	-0.460505	0.0997333	-4.61737	3.88635e-06	9.22266e-05	Coding
Icam1	727.362	0.572955	0.124211	4.61276	3.97357e-06	9.41399e-05	Coding
Tomm40	813.15	-0.444288	0.0963905	-4.60925	4.04127e-06	9.55853e-05	Coding
Apbb1	13.9063	-2.17297	0.471555	-4.60809	4.06382e-06	9.59599e-05	Coding
Mmp19	218.745	0.862601	0.187242	4.60688	4.08749e-06	9.63595e-05	Coding
Serpinb9	327.782	1.50524	0.326784	4.60621	4.10067e-06	9.65111e-05	Coding
H2-K1	27966.1	0.424442	0.0921543	4.60578	4.10932e-06	9.65555e-05	Coding
Stx3	356.552	0.626232	0.136101	4.60123	4.20001e-06	9.85245e-05	Coding
Ung	91.6809	-0.814294	0.177052	-4.59919	4.24141e-06	9.93325e-05	Coding
Zeb2os	493.592	0.298527	0.0649285	4.59778	4.27021e-06	9.98433e-05	Noncoding
Herc6	222.136	0.579596	0.126084	4.59691	4.2881e-06	9.99344e-05	Coding
Srsf2	2388.71	-0.267008	0.0580818	-4.59711	4.28401e-06	9.99344e-05	Coding
Mdm2	598.822	0.531733	0.115717	4.59514	4.32468e-06	0.000100623	Coding
Mafk	229.181	0.736186	0.160343	4.59133	4.40438e-06	0.000102311	Coding
Timd4	85.3684	1.02163	0.222566	4.59022	4.42782e-06	0.000102688	Coding
Amdhd2	491.519	0.528951	0.115321	4.58677	4.50154e-06	0.00010417	Coding
Smpdl3a	1394.23	0.833086	0.181637	4.58655	4.50631e-06	0.00010417	Coding
Cct6a	1496.34	-0.450825	0.0983381	-4.58444	4.55202e-06	0.000105007	Noncoding
Casp1	1386.58	0.408629	0.0891386	4.5842	4.55721e-06	0.000105007	Coding
F10	325.154	1.55548	0.339842	4.57706	4.71549e-06	0.000108479	Coding
Tmem176a	547.517	0.75843	0.165733	4.5762	4.73489e-06	0.000108576	Coding
Melk	138.956	-0.958198	0.209381	-4.57633	4.73199e-06	0.000108576	Coding
Mbd3	656.502	-0.291828	0.0638103	-4.57337	4.79933e-06	0.000109877	Coding
Mxd1	668.344	1.4676	0.321072	4.57095	4.85522e-06	0.000110801	Coding
Irf8	3487.35	0.492333	0.107706	4.5711	4.85174e-06	0.000110801	Coding
Pgp	598.467	-0.34433	0.075347	-4.56993	4.87895e-06	0.000111165	Coding
Sp100	1014.83	0.476265	0.104247	4.56862	4.90939e-06	0.000111681	Coding
Qsox2	53.0852	-0.764569	0.167414	-4.56693	4.94918e-06	0.000112407	Coding
Clk1	424.165	0.6181	0.135374	4.56588	4.97403e-06	0.000112792	Coding
Ppid	265.019	-0.507347	0.111169	-4.56375	5.02485e-06	0.000113673	Coding
Aspm	100.621	-0.974597	0.213559	-4.56358	5.02878e-06	0.000113673	Coding
Tppp3	205.064	1.01067	0.221701	4.55872	5.14671e-06	0.000116155	Coding
Tomm5	1449.01	-0.298262	0.0654716	-4.55559	5.22384e-06	0.000117709	Coding
Ifrd2	93.2977	-0.845805	0.185813	-4.55192	5.3159e-06	0.000119595	Coding
Fgfbp3	22.528	1.2808	0.281433	4.55099	5.33941e-06	0.000119935	Coding
Atic	380.839	-0.532951	0.117202	-4.54728	5.43424e-06	0.000121343	Coding
Irgm2	271.471	0.452001	0.0993963	4.54746	5.42979e-06	0.000121343	Coding
Svip	136.636	0.907594	0.199593	4.54721	5.43605e-06	0.000121343	Coding
Map1lc3a	286.51	0.520751	0.114513	4.54753	5.42799e-06	0.000121343	Coding
Arl5b	132.17	0.928789	0.204404	4.5439	5.52231e-06	0.000122714	Coding
Sort1	32.5615	1.66928	0.36737	4.54386	5.52324e-06	0.000122714	Coding
Mrps22	201.109	-0.490354	0.107914	-4.54392	5.52178e-06	0.000122714	Coding
Leprot	1084.9	0.328844	0.0723927	4.5425	5.55898e-06	0.000122897	Coding
Pkp3	101.988	0.823765	0.181335	4.54277	5.55188e-06	0.000122897	Coding
Oasl2	574.743	0.550975	0.1213	4.54224	5.5659e-06	0.000122897	Coding
Mrpl12	1155.89	-0.442993	0.0975234	-4.54243	5.56094e-06	0.000122897	Coding
Rps6	6329.08	-0.413975	0.0911473	-4.54182	5.57696e-06	0.000122951	Ribosomal
Prkx	261.373	0.641617	0.141312	4.54042	5.61412e-06	0.000123519	Coding
Gm37651	49.9902	1.16531	0.256664	4.5402	5.62002e-06	0.000123519	Predicted
Panx1	111.367	0.673982	0.148474	4.53938	5.642e-06	0.000123812	Coding
Gm11336	22.7677	-1.28496	0.283134	-4.53835	5.6697e-06	0.000124229	Predicted
Cib1	716.621	0.42768	0.0943174	4.53448	5.77469e-06	0.000126336	Coding
Blvrb	3483.2	0.869774	0.191874	4.53305	5.81373e-06	0.000126995	Coding
2020-09-11	273.943	-0.588393	0.129839	-4.53172	5.85064e-06	0.000127607	Coding
C1s2	10.898	2.16911	0.479017	4.52826	5.94722e-06	0.000129515	Coding
Mki67	1107.19	-0.995768	0.219917	-4.52793	5.95636e-06	0.000129517	Coding
Srm	337.261	-0.708091	0.156589	-4.52197	6.12654e-06	0.000133015	Coding
Npm1	9400.04	-0.383914	0.0849401	-4.51982	6.18936e-06	0.000133972	Coding
Tnfrsf1b	553.68	0.797276	0.176388	4.52001	6.18373e-06	0.000133972	Coding
Dusp9	24.2956	-1.43976	0.318621	-4.51872	6.22159e-06	0.000134465	Coding
Park7	2531.88	-0.309109	0.0684272	-4.51733	6.26229e-06	0.000135141	Coding
Cd7	39.0321	3.14527	0.696453	4.51612	6.29816e-06	0.000135505	Coding
Hspa1a	9606.96	0.538383	0.119213	4.51616	6.2971e-06	0.000135505	Coding
Arhgap26	72.3608	0.910865	0.20176	4.5146	6.34365e-06	0.000136279	Coding
Ier2	1213.32	0.510177	0.11305	4.51286	6.39604e-06	0.000137198	Coding
Mcm6	369.202	-0.885049	0.196164	-4.51178	6.42847e-06	0.000137582	Coding
Ccnl1	952.193	0.472268	0.104678	4.51163	6.43318e-06	0.000137582	Coding
Gm6166	32.5421	1.41306	0.313451	4.50806	6.54244e-06	0.000139709	Predicted
Fbxo6	531.794	0.428933	0.0952399	4.50371	6.67762e-06	0.000142383	Coding
Cnn2	671.44	0.548664	0.121835	4.50333	6.6897e-06	0.000142428	Coding
Selenoh	1083.99	-0.515982	0.114664	-4.49996	6.79649e-06	0.000144448	Coding
Sharpin	359.135	0.340486	0.0756685	4.4997	6.8048e-06	0.000144448	Coding
Cdk1	747.717	-0.835503	0.18575	-4.49801	6.85929e-06	0.000145389	Coding
Ier3ip1	1836.1	0.208	0.0462679	4.49556	6.93875e-06	0.0001468	Coding
Ifi211	483.88	0.599702	0.133406	4.49532	6.94642e-06	0.0001468	Coding
Chmp1b	329.592	0.475443	0.105817	4.49305	7.02114e-06	0.00014816	Coding
Ddx39b	1473.42	-0.319359	0.0710915	-4.49222	7.04842e-06	0.000148516	Coding
Tspan3	538.439	0.664016	0.147853	4.49106	7.0871e-06	0.000149111	Coding
Tagln2	5942.12	-0.38605	0.0859924	-4.48935	7.14401e-06	0.000150087	Coding
Fanca	98.4737	0.788669	0.175696	4.48882	7.16196e-06	0.000150243	Coding
Rfc5	334.348	-0.475807	0.106111	-4.48406	7.32364e-06	0.00015341	Coding
Psap	27361.5	0.579134	0.129252	4.48065	7.44156e-06	0.000155652	Coding
Slamf6	134.988	0.533518	0.119097	4.47969	7.47517e-06	0.000155671	Coding
Gstm1	141.04	0.665107	0.148469	4.47976	7.47265e-06	0.000155671	Coding
Ccrl2	2025.54	1.22259	0.27291	4.47982	7.47055e-06	0.000155671	Coding
Hk3	1579.02	0.612839	0.136879	4.47725	7.56118e-06	0.000157233	Coding
Anxa6	512.824	0.488735	0.109257	4.47325	7.70389e-06	0.000159968	Coding
Peli1	630.257	0.335839	0.0750868	4.47267	7.72477e-06	0.00016009	Coding
Erh	905.029	-0.448291	0.100234	-4.47247	7.73218e-06	0.00016009	Coding
Cct2	2199.51	-0.289216	0.06473	-4.46804	7.89404e-06	0.000162969	Coding
Nudt9	512.796	0.293944	0.0657862	4.46817	7.88915e-06	0.000162969	Coding
Bzw2	255.713	-0.551715	0.123505	-4.46714	7.92741e-06	0.000163421	Coding
Ubc	2671.13	0.553177	0.123853	4.46642	7.95408e-06	0.000163735	Coding
Braf	147.049	0.559863	0.125449	4.46287	8.08672e-06	0.000166226	Coding
Asprv1	12.2367	1.86484	0.417906	4.46234	8.10711e-06	0.000166405	Coding
Clec4a2	2328.3	-0.268884	0.0602768	-4.46082	8.1645e-06	0.000167343	Coding
Trib1	539.441	0.642315	0.144001	4.4605	8.17669e-06	0.000167353	Coding
Itm2b	24574.6	0.518359	0.11624	4.4594	8.21894e-06	0.000167977	Coding
Ms4a6d	11281	0.342766	0.0769193	4.45618	8.34323e-06	0.000170273	Coding
Gramd3	110.844	1.04636	0.234876	4.45492	8.39239e-06	0.000171032	Coding
Asap1	214.601	0.629623	0.141373	4.45364	8.44254e-06	0.000171809	Coding
Nab1	493.927	0.482664	0.108393	4.45292	8.47098e-06	0.000172143	Coding
Arsb	279.238	-0.827495	0.185884	-4.45167	8.52058e-06	0.000172905	Coding
Wdr43	394.084	-0.411391	0.0924307	-4.45081	8.55482e-06	0.000173353	Coding
Mcm2	202.197	-0.643097	0.144572	-4.44829	8.65584e-06	0.000174959	Coding
F5	35.6954	1.39342	0.313275	4.44791	8.6708e-06	0.000174959	Coding
Stmn1	1835.52	-0.844256	0.189806	-4.448	8.66744e-06	0.000174959	Coding
Parvb	250.383	-0.445812	0.100306	-4.4445	8.80982e-06	0.000177514	Coding
Cldnd1	418.582	0.438993	0.0988193	4.44238	8.89676e-06	0.000179013	Coding
Gdf15	45.4367	1.87282	0.421727	4.44083	8.96109e-06	0.000180054	Coding
Wdr75	171.162	-0.568646	0.128059	-4.44048	8.97583e-06	0.000180096	Coding
Kpnb1	653.396	-0.38131	0.085914	-4.43828	9.06805e-06	0.000181692	Coding
Tbc1d8	81.1558	1.2021	0.270879	4.43775	9.09037e-06	0.000181884	Coding
Gzmd	6.05305	3.4498	0.778904	4.42905	9.46487e-06	0.000189112	Coding
Fem1c	326.777	0.576524	0.13018	4.42868	9.48132e-06	0.000189176	Coding
Hs2st1	144.778	-0.567021	0.128044	-4.42833	9.49669e-06	0.000189219	Coding
Fcgr3	7817.9	0.338738	0.0765145	4.42711	9.55025e-06	0.000189756	Coding
Cbx3	959.195	-0.373599	0.0843883	-4.42715	9.54883e-06	0.000189756	Coding
Crem	332.139	0.744764	0.168431	4.42177	9.78942e-06	0.000194238	Coding
Rnf115	751.874	0.406014	0.0918502	4.42039	9.85209e-06	0.000195211	Coding
Il3ra	271.786	0.350542	0.0793222	4.41921	9.90611e-06	0.000196009	Coding
Aurka	195.333	-0.844726	0.19118	-4.41849	9.93937e-06	0.000196395	Coding
Nr1h2	448.764	0.327572	0.0741476	4.41784	9.9693e-06	0.000196443	Coding
Tpm1	261.974	-0.536691	0.121479	-4.41797	9.96314e-06	0.000196443	Coding
Inhba	475.703	2.05768	0.465831	4.41723	9.99716e-06	0.000196721	Coding
Tmem67	82.1595	0.731516	0.165659	4.4158	1.00639e-05	0.000197762	Coding
Clec9a	92.2995	2.10785	0.477438	4.41492	1.01049e-05	0.000198295	Coding
Ensa	782.226	0.327938	0.0743452	4.41102	1.02885e-05	0.000201622	Coding
Il13ra1	468.578	0.466471	0.105766	4.41038	1.03188e-05	0.000201661	Coding
Aig1	679.133	0.381197	0.0864311	4.41042	1.03172e-05	0.000201661	Coding
Hist1h1a	28.1468	-1.12315	0.254886	-4.4065	1.05056e-05	0.000205031	Coding
Uvrag	388.553	0.508225	0.115343	4.4062	1.05201e-05	0.000205035	Coding
Abhd16a	528.031	0.322672	0.0732428	4.40552	1.05531e-05	0.000205117	Coding
Ezh2	495.355	-0.584092	0.132575	-4.40576	1.05414e-05	0.000205117	Coding
Batf	176.783	0.629282	0.142857	4.40496	1.05802e-05	0.000205366	Coding
Nfkbib	550.671	0.492929	0.111993	4.40144	1.07535e-05	0.000208163	Coding
AW011738	75.6974	0.973515	0.221167	4.40172	1.07398e-05	0.000208163	Coding
Gabarap	7402.43	0.298239	0.0677692	4.40081	1.07849e-05	0.000208489	Coding
Mefv	280.864	0.730531	0.166019	4.40029	1.08104e-05	0.0002087	Coding
Nuak2	296.357	0.686455	0.156079	4.39812	1.09195e-05	0.00021052	Coding
Gar1	380.992	-0.563207	0.12808	-4.39732	1.09595e-05	0.000211008	Coding
Ranbp1	3173.42	-0.496561	0.113034	-4.393	1.11796e-05	0.000214955	Coding
Neat1	3073.95	0.471785	0.107432	4.39146	1.1259e-05	0.000216192	Noncoding
Arl5a	342.834	0.583441	0.13291	4.38975	1.1348e-05	0.000217608	Coding
Hist1h2ak	37.1098	-1.34861	0.307258	-4.38916	1.13788e-05	0.000217905	Coding
Slc7a1	99.9462	-0.684551	0.15603	-4.38731	1.14762e-05	0.000219477	Coding
Prc1	416.389	-0.95297	0.217227	-4.38697	1.14941e-05	0.000219525	Coding
Fam46a	898.573	0.459786	0.10492	4.38225	1.17457e-05	0.000224032	Coding
Utp20	95.1932	-0.606447	0.138412	-4.38147	1.17881e-05	0.00022454	Coding
Hist1h4d	147.425	-0.693445	0.158301	-4.38055	1.18381e-05	0.000225192	Coding
Snx18	824.551	0.428275	0.0978013	4.37903	1.19207e-05	0.000226462	Coding
Colgalt1	478.158	-0.319734	0.073027	-4.3783	1.1961e-05	0.000226925	Coding
Hirip3	232.614	-0.860896	0.196745	-4.3757	1.21041e-05	0.000229335	Coding
Eif3b	776.914	-0.341007	0.0779695	-4.37359	1.22221e-05	0.000231264	Coding
Ctsh	5942.91	0.279656	0.0639552	4.37269	1.22724e-05	0.000231909	Coding
Slc7a11	169.665	1.08994	0.249347	4.37118	1.23577e-05	0.000232035	Coding
Ifngr1	775.917	0.523828	0.119838	4.37113	1.23603e-05	0.000232035	Coding
Cacna1f	65.015	-0.750144	0.17158	-4.37199	1.2312e-05	0.000232035	Coding
Cdk4	888.632	-0.458118	0.104794	-4.37159	1.23345e-05	0.000232035	Coding
Espl1	109.53	-0.603335	0.138012	-4.37161	1.23334e-05	0.000232035	Coding
Clec4d	2042.62	0.794559	0.181811	4.37025	1.24104e-05	0.000232225	Coding
Gm4604	223.914	-0.426787	0.0976607	-4.3701	1.24191e-05	0.000232225	Predicted
Abca9	24.069	1.3249	0.303136	4.37064	1.23881e-05	0.000232225	Coding
Mpeg1	5018.2	0.395191	0.090462	4.36859	1.25053e-05	0.000233529	Coding
Gm13535	26.8775	1.3906	0.31835	4.36816	1.25299e-05	0.000233684	Predicted
Syne3	64.8774	-0.756308	0.173167	-4.36751	1.25671e-05	0.000234072	Coding
Spag5	71.9758	-0.973355	0.222885	-4.36707	1.25926e-05	0.000234241	Coding
Rpl35	13911.6	-0.37289	0.0854015	-4.36631	1.26361e-05	0.000234746	Ribosomal
Dctpp1	646.711	-0.445215	0.101976	-4.36587	1.26621e-05	0.000234922	Coding
C1rb	75.1858	0.960779	0.220222	4.36277	1.28428e-05	0.000237967	Coding
Fndc5	13.7035	3.47617	0.797757	4.35743	1.31599e-05	0.000243527	Coding
Rfc4	277.171	-0.622956	0.142989	-4.35668	1.32053e-05	0.00024405	Coding
Pdia4	705.272	-0.312403	0.0717158	-4.35612	1.32386e-05	0.000244349	Coding
Hcfc1r1	923.956	0.386086	0.0886471	4.35531	1.32876e-05	0.000244938	Coding
Rnf130	1844.51	0.328074	0.0753393	4.35462	1.33298e-05	0.0002454	Coding
Mrps26	852.318	-0.300133	0.0689541	-4.35265	1.345e-05	0.000247293	Coding
Ptma	27775.4	-0.421919	0.096946	-4.35211	1.34836e-05	0.000247592	Coding
Ebna1bp2	763.701	-0.32143	0.0738667	-4.35149	1.35217e-05	0.000247973	Coding
Nhp2	1278.24	-0.420196	0.0965705	-4.35118	1.35404e-05	0.000247998	Coding
Shisa5	2066.79	0.259709	0.0597571	4.34607	1.38597e-05	0.00025352	Coding
Myc	175.494	-0.880926	0.202779	-4.34426	1.39745e-05	0.000254967	Coding
Dock5	91.2163	-0.717151	0.165075	-4.34441	1.3965e-05	0.000254967	Coding
Lsm10	360.93	0.322476	0.0742632	4.34233	1.40977e-05	0.000256887	Coding
Ndufb6	1593.1	-0.243807	0.0561706	-4.34048	1.42175e-05	0.00025874	Coding
Tipin	454.933	-0.62991	0.145152	-4.33967	1.42698e-05	0.000259033	Coding
Gm37531	101.293	1.00408	0.231364	4.33982	1.426e-05	0.000259033	Predicted
Hnrnpr	617.018	-0.387824	0.0893799	-4.33905	1.43099e-05	0.00025943	Coding
Tubb6	1076.43	-0.4335	0.0999146	-4.3387	1.43327e-05	0.000259514	Coding
Kif11	197.781	-0.838054	0.193302	-4.33547	1.4545e-05	0.000263024	Coding
Gcnt1	146.299	-0.806786	0.186183	-4.3333	1.46892e-05	0.000265297	Coding
Cmtm3	688.401	0.335476	0.0774715	4.33032	1.48894e-05	0.000268573	Coding
H2afz	12219.8	-0.295632	0.0682951	-4.32874	1.49967e-05	0.000270167	Coding
Cndp2	2165.43	0.372791	0.0861382	4.32782	1.50592e-05	0.000270951	Coding
Rpl4	8899.79	-0.246857	0.0570498	-4.32704	1.51123e-05	0.000271566	Ribosomal
Gm42776	8.6521	1.96765	0.454959	4.3249	1.52599e-05	0.000273873	Predicted
Rdx	658.706	-0.25858	0.0597926	-4.32461	1.52799e-05	0.000273887	Coding
Wars	409.08	0.484305	0.112069	4.32149	1.54977e-05	0.000277444	Coding
Nudt5	443.249	-0.427732	0.0990249	-4.31944	1.56426e-05	0.000279687	Coding
Slc16a6	324.547	-0.41508	0.0961437	-4.31729	1.57959e-05	0.000282076	Coding
Fzd1	100.802	0.787784	0.182603	4.31418	1.60198e-05	0.000285716	Coding
Pnp	3858.99	0.237295	0.0550405	4.31128	1.62311e-05	0.000288367	Coding
Irak2	293.294	0.564945	0.131042	4.31119	1.62377e-05	0.000288367	Coding
5330406M23Rik	239.478	0.770602	0.178721	4.31175	1.6197e-05	0.000288367	Noncoding
Sik1	112.986	1.32794	0.308032	4.31104	1.62492e-05	0.000288367	Coding
Mrpl23	180.907	-0.426124	0.0988593	-4.31041	1.62951e-05	0.000288823	Coding
Klra2	1781.69	0.258228	0.0599225	4.30937	1.63719e-05	0.000289466	Coding
Ethe1	533.078	0.548363	0.127242	4.3096	1.63547e-05	0.000289466	Coding
Eprs	683.944	-0.329938	0.0766188	-4.30623	1.66062e-05	0.000293246	Coding
Rpl14	15707.3	-0.35936	0.083458	-4.30588	1.66321e-05	0.000293341	Ribosomal
Ifi209	737.44	0.795445	0.184779	4.30484	1.67109e-05	0.000294367	Coding
Malt1	233.206	0.749942	0.17423	4.30432	1.67499e-05	0.000294692	Coding
Gm7730	34.0591	-0.931216	0.216372	-4.30378	1.67909e-05	0.000294866	Predicted
Cdc42ep2	168.858	0.933631	0.21694	4.30364	1.68011e-05	0.000294866	Coding
Nedd9	73.9522	0.980407	0.227873	4.30243	1.68936e-05	0.000296125	Coding
Cd200r4	295.457	0.662914	0.154189	4.29935	1.71302e-05	0.000299905	Coding
Uhrf1	231.729	-0.715806	0.166508	-4.29893	1.71624e-05	0.000300101	Coding
Rbbp7	747.146	-0.399539	0.0929533	-4.29828	1.72131e-05	0.000300619	Coding
Mettl1	208.746	-0.528623	0.123017	-4.29716	1.73001e-05	0.000301769	Coding
Tubb4b	1933.07	-0.664013	0.154536	-4.29682	1.73268e-05	0.000301866	Coding
Cd207	21.2039	-1.3324	0.310135	-4.29619	1.73756e-05	0.000302216	Coding
Fgr	520.786	0.582281	0.135548	4.29575	1.74103e-05	0.000302216	Coding
Stub1	807.149	-0.240832	0.0560617	-4.29584	1.74034e-05	0.000302216	Coding
Pop5	425.163	-0.425703	0.0991287	-4.29444	1.75133e-05	0.000303634	Coding
Pmf1	418.322	-0.489566	0.114043	-4.29282	1.76419e-05	0.000305493	Coding
Ncapd2	116.544	-0.84841	0.197652	-4.29244	1.76719e-05	0.000305643	Coding
Rps3a2	1262.93	-0.305715	0.0712342	-4.29169	1.7732e-05	0.000306312	Ribosomal
Gpatch4	209.105	-0.793419	0.184891	-4.29128	1.77649e-05	0.000306508	Coding
Lgals3bp	1741.15	0.381889	0.0890447	4.28873	1.79694e-05	0.000309033	Coding
Vwf	66.8778	1.15001	0.268146	4.28873	1.79697e-05	0.000309033	Coding
Prmt1	1021.88	-0.460852	0.107458	-4.28865	1.79761e-05	0.000309033	Coding
Atp2b4	167.968	-0.655383	0.152849	-4.28777	1.80474e-05	0.000309887	Coding
Fcer1g	31999.9	0.234088	0.0546004	4.2873	1.80859e-05	0.000310175	Coding
Adrb2	200.365	0.425531	0.0992738	4.28644	1.81562e-05	0.000311007	Coding
Treml4	98.266	0.846238	0.197527	4.28417	1.83419e-05	0.000313062	Coding
Rpl27a	7490.15	-0.273084	0.0637368	-4.28456	1.83103e-05	0.000313062	Ribosomal
Hist1h1e	241.249	-0.591153	0.137983	-4.28424	1.83368e-05	0.000313062	Coding
E130102H24Rik	31.3759	1.09986	0.256805	4.28287	1.84498e-05	0.000314527	Noncoding
Smox	975.524	0.53355	0.124594	4.28231	1.84961e-05	0.000314941	Coding
Il15	183.131	0.702226	0.164018	4.28138	1.85735e-05	0.000315882	Coding
Spop	1386.63	0.255869	0.0597675	4.28107	1.85997e-05	0.000315951	Coding
Mthfs	294.993	0.407316	0.0951967	4.27868	1.88004e-05	0.000318982	Coding
Top2a	1166.46	-0.889334	0.208229	-4.27094	1.94649e-05	0.000329864	Coding
Abcg1	524.856	0.534171	0.125097	4.27005	1.95432e-05	0.000330798	Coding
Pgap1	125.286	0.849909	0.199109	4.26856	1.96736e-05	0.000332612	Coding
Rbms1	1681.28	0.33108	0.0776295	4.26487	2.00022e-05	0.000337767	Coding
Gbp6	23.3256	1.22735	0.287828	4.26418	2.00636e-05	0.000338405	Coding
Fyn	394.155	0.365125	0.0856416	4.26341	2.01334e-05	0.000339181	Coding
Ppp1r15a	845.126	0.680305	0.159617	4.26211	2.02507e-05	0.000340755	Coding
Lrrc25	821.578	0.29782	0.0699136	4.25983	2.04586e-05	0.000343848	Coding
Slc29a1	372.084	-0.505658	0.118764	-4.25767	2.06571e-05	0.000346777	Coding
Ran	5712.58	-0.440282	0.103416	-4.2574	2.0682e-05	0.000346787	Coding
Rpsa-ps10	319.09	-0.446199	0.104842	-4.25594	2.08173e-05	0.000348646	Noncoding
Ccdc162	3.66674	5.48482	1.28943	4.25366	2.10302e-05	0.0003518	Coding
Tubb5	8144.28	-0.599419	0.140931	-4.25328	2.10663e-05	0.000351991	Coding
Gm11478	540.196	-0.332219	0.0781455	-4.25128	2.12548e-05	0.000354727	Predicted
Snrnp70	986.065	-0.221853	0.0521944	-4.25053	2.1327e-05	0.000355516	Coding
Cd53	3758.6	0.260456	0.0612878	4.24972	2.14041e-05	0.000356385	Coding
Sem1	8069.95	0.233117	0.0548926	4.24679	2.1686e-05	0.000360658	Coding
Eef1d	3042.83	-0.332283	0.0782538	-4.24622	2.17406e-05	0.000361146	Coding
Pabpc4	117.431	-0.615436	0.144982	-4.24491	2.1868e-05	0.000362841	Coding
Dscc1	59.973	-0.768477	0.181053	-4.2445	2.19085e-05	0.000363091	Coding
Cit	64.0178	-0.811552	0.191276	-4.24283	2.2072e-05	0.000365378	Coding
Myo10	64.5843	-1.23571	0.291399	-4.24061	2.22909e-05	0.000368573	Coding
Lrr1	72.5081	-1.10169	0.259837	-4.23992	2.23595e-05	0.000369281	Coding
Ndufa12	341.939	-0.401627	0.0948058	-4.23631	2.27222e-05	0.000373974	Coding
Rraga	607.179	0.373629	0.0881925	4.23652	2.27013e-05	0.000373974	Coding
Spred1	546.395	-0.420859	0.0993341	-4.2368	2.26729e-05	0.000373974	Coding
AC159815.1	174.966	-0.461522	0.108984	-4.23477	2.28785e-05	0.000376112	Noncoding
Eif3j1	319.805	-0.320003	0.0755764	-4.23416	2.29404e-05	0.000376305	Coding
Idh3a	603.612	-0.673261	0.159008	-4.23414	2.29428e-05	0.000376305	Coding
Tlr12	96.766	0.84628	0.199955	4.23235	2.3126e-05	0.000378875	Coding
N4bp1	826.634	0.486567	0.115017	4.2304	2.33278e-05	0.000381743	Coding
Ermp1	127.07	-0.577579	0.13654	-4.23012	2.33568e-05	0.000381779	Coding
Lyar	648.277	-0.424877	0.100528	-4.22647	2.37385e-05	0.000387576	Coding
Smc3	450.673	-0.374538	0.0886433	-4.22523	2.38698e-05	0.000389274	Coding
Rpa1	232.478	-0.442474	0.10486	-4.21966	2.44672e-05	0.000398043	Coding
Ccl22	34.4481	3.61072	0.855656	4.21983	2.44486e-05	0.000398043	Coding
Tnfrsf18	15.4224	2.26474	0.536739	4.21944	2.44911e-05	0.000398043	Coding
Sertad1	425.008	0.459657	0.108981	4.21775	2.46748e-05	0.000399664	Coding
Bdh2	250.666	-1.65713	0.39287	-4.21801	2.46465e-05	0.000399664	Coding
Hbb-bs	29.1643	1.86207	0.441459	4.21799	2.46494e-05	0.000399664	Coding
Mmp8	68.9453	1.34001	0.317801	4.21651	2.48115e-05	0.000401423	Coding
Slc44a2	126.432	0.73745	0.17493	4.21568	2.49029e-05	0.000402447	Coding
Serf1	373.63	-0.798283	0.189376	-4.21534	2.49406e-05	0.0004026	Coding
Rps6-ps4	474.097	-0.443988	0.105347	-4.21452	2.50314e-05	0.00040361	Ribosomal
Pald1	144.859	-0.63089	0.14973	-4.21352	2.51418e-05	0.000404933	Coding
Csf2ra	1994.5	0.178704	0.0424556	4.20919	2.56284e-05	0.000412305	Coding
Mrpl42	1366.1	-0.306574	0.0728395	-4.2089	2.56622e-05	0.000412384	Coding
Irf5	1521.82	0.276659	0.0657609	4.20705	2.5873e-05	0.000415153	Coding
Ckap5	271.746	-0.444598	0.105684	-4.20688	2.58926e-05	0.000415153	Coding
Mvp	920.577	0.412026	0.0979594	4.20609	2.59825e-05	0.000416128	Coding
Rnh1	3311.65	0.281737	0.0669931	4.20546	2.60548e-05	0.000416819	Coding
Traf1	223.107	1.14001	0.271274	4.20243	2.6406e-05	0.000421964	Coding
Cinp	282.075	-0.400586	0.0953603	-4.20076	2.66022e-05	0.000423677	Coding
Tyk2	177.303	0.42405	0.100946	4.20078	2.65997e-05	0.000423677	Coding
Apex1	468.014	-0.625258	0.148827	-4.20124	2.65452e-05	0.000423677	Coding
Klf4	499.62	0.946228	0.225316	4.19956	2.6744e-05	0.000425461	Coding
Rftn1	518.429	0.489463	0.11656	4.19924	2.67809e-05	0.000425575	Coding
Camk1d	665.77	0.350291	0.0834398	4.19812	2.69135e-05	0.000427206	Coding
Zfp703	325.191	0.606824	0.144609	4.1963	2.7131e-05	0.000430181	Coding
Prdx5	17961.6	0.447319	0.106616	4.19562	2.72129e-05	0.000431001	Coding
Foxm1	95.0278	-0.845469	0.201579	-4.19424	2.73785e-05	0.000433145	Coding
Gm4617	47.4908	-0.802443	0.191337	-4.19387	2.74235e-05	0.000433376	Predicted
Nup43	188.087	-0.6611	0.157654	-4.19336	2.74851e-05	0.00043387	Coding
Snrpd1	2096.31	-0.344979	0.0823014	-4.19165	2.76932e-05	0.000436672	Coding
Lig1	636.809	-0.716985	0.171078	-4.19098	2.7775e-05	0.000436997	Coding
Rrs1	239.596	-0.483648	0.115399	-4.1911	2.776e-05	0.000436997	Coding
Csf2rb2	440.236	0.672561	0.160549	4.18914	2.80011e-05	0.00044007	Coding
Ppil1	274.393	-0.610473	0.145742	-4.18871	2.80546e-05	0.000440427	Coding
Gm10039	767.424	-0.36942	0.088206	-4.18815	2.81235e-05	0.000441024	Predicted
Anapc5	963.305	-0.30561	0.0729843	-4.18734	2.82239e-05	0.000442112	Coding
Phf11b	1306.17	0.373537	0.0892461	4.18547	2.84572e-05	0.000445279	Coding
Grina	2341.4	0.738589	0.176572	4.18293	2.87775e-05	0.000449798	Coding
Rbm47	306.436	0.422436	0.101033	4.18117	2.90009e-05	0.000452303	Coding
Psmg1	260.884	-0.405075	0.0968864	-4.18092	2.90328e-05	0.000452303	Coding
Tle3	241.344	0.637051	0.152369	4.18098	2.9025e-05	0.000452303	Coding
Sirpb1b	617.99	0.378874	0.0906315	4.18038	2.91025e-05	0.000452403	Coding
Akr7a5	244.582	-0.426192	0.101946	-4.18057	2.90779e-05	0.000452403	Coding
Cdkn1b	362.786	0.431513	0.103233	4.17998	2.91533e-05	0.0004527	Coding
Tomm20	2655.62	-0.211454	0.0506177	-4.17747	2.94776e-05	0.000457238	Coding
Ank	84.0405	-0.92502	0.221633	-4.17366	2.99743e-05	0.000464439	Coding
Mrps35	331.992	-0.394254	0.0944817	-4.17281	3.00861e-05	0.000465162	Coding
Gm26669	50.5293	0.786804	0.188554	4.17284	3.00821e-05	0.000465162	Predicted
Hist1h2bl	22.5769	-1.16485	0.279225	-4.17171	3.02326e-05	0.000466922	Coding
Gngt2	2115.48	0.409435	0.0981659	4.17085	3.0347e-05	0.000468182	Coding
Ogfr	766.3	0.368684	0.0884083	4.17024	3.04278e-05	0.000468924	Coding
Gcat	106.91	-0.725453	0.173975	-4.16987	3.04778e-05	0.000469188	Coding
Slfn8	361.82	0.500247	0.120082	4.16587	3.10171e-05	0.000476976	Coding
Lacc1	193.962	0.479266	0.115062	4.16528	3.10965e-05	0.000477682	Coding
Gm21762	11.4503	7.1966	1.72888	4.16258	3.14671e-05	0.000482857	Predicted
H2-DMb2	2436.5	0.378288	0.0908891	4.16209	3.15352e-05	0.000482863	Coding
Pglyrp1	32.5444	2.1954	0.527471	4.16213	3.15292e-05	0.000482863	Coding
Knl1	237.662	-0.927404	0.22284	-4.16174	3.15829e-05	0.000483077	Coding
Itgav	412.846	-0.651683	0.156676	-4.15943	3.19042e-05	0.000486611	Coding
Ifrd1	1279.86	0.774825	0.186285	4.15935	3.19161e-05	0.000486611	Coding
Rpl36	16084.8	-0.298029	0.071645	-4.15981	3.18514e-05	0.000486611	Ribosomal
Nr4a1	491.213	0.970403	0.233445	4.15687	3.22634e-05	0.000491381	Coding
Mospd2	326.682	0.481119	0.115756	4.15631	3.23427e-05	0.000491541	Coding
Wdr77	155.568	-0.574668	0.138259	-4.15645	3.23231e-05	0.000491541	Coding
Sumf1	369.107	0.315396	0.0759026	4.15527	3.24907e-05	0.000493265	Coding
Gm26917	837.584	-0.31135	0.074936	-4.15488	3.25458e-05	0.000493577	Predicted
Vkorc1l1	169.067	-0.487439	0.117325	-4.15459	3.25873e-05	0.000493681	Coding
Alkbh5	575.766	0.299441	0.0720876	4.15384	3.26938e-05	0.000494536	Coding
Limd2	1432.83	0.419952	0.101103	4.15371	3.27129e-05	0.000494536	Coding
Zfp800	471.215	0.509456	0.122707	4.15182	3.29842e-05	0.000497203	Coding
Ifi205	86.6114	1.18453	0.285284	4.15211	3.29429e-05	0.000497203	Coding
Rps12-ps3	18.0554	-1.28836	0.310318	-4.15175	3.29937e-05	0.000497203	Ribosomal
Trim28	438.487	-0.453749	0.109298	-4.15147	3.30346e-05	0.000497294	Coding
Coq10b	240.479	0.756757	0.18231	4.15094	3.31113e-05	0.000497924	Coding
Glrx	3561.48	0.550674	0.132671	4.15068	3.31487e-05	0.000497962	Coding
Ptpn6	2274.74	0.215813	0.0520306	4.1478	3.35678e-05	0.0005032	Coding
Fam102b	329.203	0.573739	0.138316	4.14802	3.35364e-05	0.0005032	Coding
Sub1	3368.25	0.432389	0.10427	4.14684	3.37095e-05	0.000504795	Coding
Lman1	703.763	-0.274747	0.0662772	-4.14542	3.39197e-05	0.00050741	Coding
Tmcc1	159.852	0.641266	0.15472	4.14469	3.4027e-05	0.000508483	Coding
Arhgap15	420.159	0.347656	0.0839074	4.14332	3.42307e-05	0.000510992	Coding
4930455G09Rik	131.457	0.548726	0.132609	4.13793	3.50454e-05	0.000522608	Noncoding
Cpq	786.47	0.388958	0.0940307	4.1365	3.52644e-05	0.000525325	Coding
Mospd1	56.293	0.908446	0.219644	4.13598	3.53436e-05	0.000525956	Coding
Cfap43	132.259	0.629028	0.152108	4.13539	3.54354e-05	0.000526774	Coding
2020-03-01	672.301	0.49532	0.119816	4.134	3.56503e-05	0.00052832	Coding
Edem2	503.073	0.303275	0.0733603	4.13405	3.5642e-05	0.00052832	Coding
Tmem173	912.3	0.280197	0.0677769	4.13412	3.56323e-05	0.00052832	Coding
Ubap2	215.629	-0.475474	0.115067	-4.13216	3.59368e-05	0.000532013	Coding
Xpo1	395.661	-0.441702	0.106913	-4.13141	3.60538e-05	0.000533193	Coding
Cdv3	746.696	-0.215349	0.0521313	-4.1309	3.61352e-05	0.000533844	Coding
Mapkapk2	1354.78	0.331334	0.0802859	4.12693	3.67644e-05	0.000542579	Coding
Cryba4	18.5778	1.41089	0.34204	4.12492	3.70861e-05	0.000546761	Coding
Hbp1	291.163	0.501948	0.121753	4.12268	3.74498e-05	0.000549799	Coding
S100a9	2138.59	1.97323	0.478626	4.12269	3.74472e-05	0.000549799	Coding
Igkc	42.0795	4.50673	1.09307	4.123	3.73964e-05	0.000549799	Coding
Card11	21.274	1.73784	0.421555	4.12246	3.74845e-05	0.000549799	Coding
Pphln1	384.887	0.331672	0.0804492	4.12275	3.74377e-05	0.000549799	Coding
Sidt2	225.958	0.567337	0.137666	4.12112	3.77036e-05	0.000552445	Coding
Tmem110	98.1793	0.649643	0.157699	4.1195	3.79694e-05	0.00055577	Coding
Sec11c	1743.01	-0.188419	0.0457421	-4.11915	3.80273e-05	0.000555966	Coding
Slc12a9	167.723	0.457143	0.110986	4.11895	3.80606e-05	0.000555966	Coding
Phb2	1763.39	-0.290191	0.070474	-4.1177	3.82668e-05	0.000558383	Coding
AC159810.1	8.25384	-1.90432	0.462496	-4.11748	3.83043e-05	0.000558383	Noncoding
Ddhd1	123.583	1.01603	0.247034	4.11292	3.90685e-05	0.000568943	Coding
Tuba1b	5076.37	-0.449785	0.109378	-4.11222	3.91877e-05	0.000570098	Coding
Nop2	135.738	-0.606352	0.147479	-4.11145	3.93179e-05	0.00057141	Coding
Cdca2	91.6979	-0.953132	0.231916	-4.10982	3.9597e-05	0.000574297	Coding
Mars	236.616	-0.601634	0.146384	-4.10997	3.95719e-05	0.000574297	Coding
Myof	791.73	0.473659	0.115276	4.10892	3.97512e-05	0.000575949	Coding
Lilrb4a	26.4805	1.07482	0.261613	4.10843	3.98359e-05	0.000576592	Coding
Cenpn	68.4436	-0.727002	0.177012	-4.10708	4.00691e-05	0.00057938	Coding
Skap2	1767.54	0.230889	0.0562347	4.1058	4.02914e-05	0.000582005	Coding
Eme1	44.2037	-0.772064	0.188078	-4.10503	4.04262e-05	0.000583362	Coding
Rangrf	95.1005	-0.776656	0.189211	-4.1047	4.04842e-05	0.00058361	Coding
Chmp2a	2767.33	0.204795	0.0499154	4.10284	4.08104e-05	0.000587719	Coding
Timm50	585.477	-0.340609	0.0830501	-4.10125	4.10925e-05	0.000590327	Coding
Dirc2	97.3992	0.948794	0.231331	4.10145	4.10566e-05	0.000590327	Coding
Prmt7	133.294	-0.519048	0.126563	-4.10112	4.11155e-05	0.000590327	Coding
1810026B05Rik	695.471	0.364455	0.0889126	4.09902	4.14898e-05	0.000595104	Noncoding
Ubl5	4396.26	0.184208	0.0449583	4.09732	4.17958e-05	0.000597818	Coding
Acy1	32.6417	-1.71441	0.418424	-4.0973	4.18e-05	0.000597818	Coding
Cyth4	1733.9	-0.284014	0.0693178	-4.09727	4.18046e-05	0.000597818	Coding
Chchd4	250.25	-0.347935	0.0849254	-4.09695	4.18637e-05	0.000598065	Coding
Gm4968	57.7671	-0.756348	0.184857	-4.09154	4.28527e-05	0.000611582	Predicted
Pafah1b3	666.065	0.310042	0.0757882	4.0909	4.29696e-05	0.000612638	Coding
Gm42929	14.7487	1.33019	0.325203	4.09035	4.3073e-05	0.0006135	Predicted
Creg1	2660.91	0.615378	0.150529	4.0881	4.34927e-05	0.000618861	Coding
Ncaph	108.605	-0.798915	0.195522	-4.08606	4.38765e-05	0.000623408	Coding
Topbp1	215.295	-0.493223	0.120717	-4.0858	4.39257e-05	0.000623408	Coding
Gnas	2054.51	0.556168	0.136125	4.08571	4.39432e-05	0.000623408	Coding
Gm38377	60.0059	0.849898	0.208041	4.08525	4.40293e-05	0.00062401	Predicted
Casp6	280.844	0.433763	0.106226	4.08338	4.43845e-05	0.000627179	Coding
Baz1b	491.495	-0.337452	0.0826382	-4.08349	4.43647e-05	0.000627179	Coding
Tmem41a	35.0415	-0.890971	0.218189	-4.08348	4.43653e-05	0.000627179	Coding
Por	543.142	0.497569	0.121891	4.08207	4.46361e-05	0.000630111	Coding
Nrg1	83.4948	1.90641	0.467076	4.08158	4.47299e-05	0.00063081	Coding
Oas3	376.407	0.75641	0.18537	4.08053	4.49331e-05	0.000633052	Coding
Hist1h1d	77.5179	-0.887423	0.21751	-4.07991	4.50527e-05	0.000634111	Coding
Tmem243	395.995	0.294345	0.0721614	4.07899	4.52325e-05	0.000636016	Coding
Ddit3	380.443	0.473884	0.116224	4.07734	4.5554e-05	0.000639905	Coding
Bet1l	191.758	0.386536	0.0948144	4.07677	4.56666e-05	0.000640857	Coding
Arhgap27os2	116.805	0.475116	0.116552	4.07641	4.57358e-05	0.000641198	Noncoding
Smn1	813.364	-0.494798	0.121436	-4.07457	4.60996e-05	0.000645665	Coding
Pole	71.6232	-0.802334	0.196949	-4.07381	4.62506e-05	0.000647145	Coding
Abce1	251.445	-0.421083	0.103425	-4.0714	4.67318e-05	0.000653239	Coding
Tcerg1	545.372	-0.296396	0.0728846	-4.06665	4.76946e-05	0.000666047	Coding
Cdc45	112.095	-0.829235	0.203954	-4.0658	4.78686e-05	0.000667824	Coding
Ikbke	233.773	0.800597	0.196994	4.06407	4.82253e-05	0.000671753	Coding
Ifi44	2159.69	0.408317	0.100472	4.06397	4.82444e-05	0.000671753	Coding
Plin2	3577.27	0.729235	0.179535	4.06179	4.86972e-05	0.000677399	Coding
Nmi	817.437	0.310879	0.0765462	4.06132	4.87965e-05	0.00067812	Coding
Gm6654	43.9097	-0.958675	0.236065	-4.06106	4.88505e-05	0.00067821	Predicted
Gm37728	73.902	0.916992	0.225947	4.05843	4.94032e-05	0.000685217	Predicted
Syngr2	2102.51	0.503158	0.124049	4.05614	4.989e-05	0.000691298	Coding
Gm43914	20.0313	2.62435	0.647083	4.05567	4.9991e-05	0.000692027	Predicted
Atp5b	6722.46	-0.294596	0.0726538	-4.05478	5.01809e-05	0.000693983	Coding
Susd6	399.007	0.485955	0.119856	4.0545	5.02412e-05	0.000694145	Coding
Plp2	1288.33	-0.602996	0.148763	-4.05339	5.04808e-05	0.000696781	Coding
Slc25a37	289.777	0.553237	0.136534	4.05201	5.07784e-05	0.000700213	Coding
Osbpl9	812.788	0.319491	0.0788652	4.0511	5.09779e-05	0.000702286	Coding
Fabp5	2564.04	1.33193	0.328807	4.0508	5.10431e-05	0.000702507	Coding
Ly96	462.446	0.318058	0.0785222	4.05056	5.10961e-05	0.00070256	Coding
Kctd12	1171.78	0.316136	0.0780666	4.04957	5.13125e-05	0.000704856	Coding
Pfas	56.8151	-0.900788	0.222497	-4.04855	5.15368e-05	0.000706578	Coding
Kif23	200.956	-0.756347	0.186819	-4.04856	5.15329e-05	0.000706578	Coding
Tspo	12278.2	0.321706	0.0794853	4.04737	5.17968e-05	0.000709463	Coding
Plk1	188.077	-0.980701	0.242355	-4.04654	5.19798e-05	0.000711287	Coding
Rpl3-ps1	908.009	-0.413387	0.102182	-4.04559	5.21924e-05	0.000713512	Ribosomal
Tbc1d9	433.052	0.555165	0.137253	4.04483	5.23604e-05	0.000715125	Coding
Ftl1-ps1	480.935	0.506843	0.125337	4.04383	5.2585e-05	0.000717507	Coding
Atad2	384.603	-0.600916	0.148647	-4.04256	5.28702e-05	0.000720709	Coding
Tubg1	229.755	-0.517439	0.128026	-4.04167	5.30726e-05	0.000722779	Coding
Prpf19	503.343	-0.389507	0.0963916	-4.04088	5.32504e-05	0.000724509	Coding
Met	103.056	0.827214	0.204774	4.03965	5.35313e-05	0.000726947	Coding
Dennd1a	184.836	0.484644	0.119971	4.03969	5.35216e-05	0.000726947	Coding
Comtd1	424.33	-0.401995	0.0995279	-4.03901	5.36761e-05	0.000728222	Coding
Ccna2	415.588	-0.881285	0.218214	-4.03862	5.37663e-05	0.000728752	Coding
Bach1	540.157	0.518751	0.128471	4.0379	5.39329e-05	0.000730318	Coding
Cct4	1933.79	-0.272652	0.0675285	-4.03758	5.40048e-05	0.000730599	Coding
Farsb	300.902	-0.344963	0.0854464	-4.03719	5.40953e-05	0.00073113	Coding
Arhgap11a	167.623	-0.548342	0.135835	-4.03681	5.41834e-05	0.000731318	Coding
Atpif1	5238.96	-0.207687	0.0514498	-4.03669	5.42115e-05	0.000731318	Coding
Naa10	589.692	-0.530752	0.131491	-4.03641	5.42745e-05	0.000731477	Coding
Gm10689	100.504	-0.552386	0.136865	-4.03598	5.43742e-05	0.000732129	Predicted
Rab11fip1	139.484	0.96958	0.240364	4.03381	5.48802e-05	0.000738248	Coding
Gm5431	69.7773	0.661727	0.164088	4.03275	5.51274e-05	0.000740178	Predicted
Maff	156.365	0.706672	0.175225	4.03293	5.50855e-05	0.000740178	Coding
Tspan33	67.7381	1.21196	0.300731	4.03004	5.57681e-05	0.000748078	Coding
Guca1a	716.395	0.403821	0.100219	4.0294	5.59193e-05	0.000749402	Coding
Mycbp2	1021.68	0.311511	0.0773375	4.02795	5.62661e-05	0.000753344	Coding
Etv6	343.096	0.410226	0.10191	4.02539	5.688e-05	0.00076085	Coding
Itpr3	90.9512	-0.70702	0.175678	-4.02453	5.70897e-05	0.000762941	Coding
Fbxo4	130.467	0.494876	0.123031	4.02238	5.76128e-05	0.000769212	Coding
Cyp27a1	124.264	0.73791	0.183469	4.02198	5.77116e-05	0.000769812	Coding
Pcmtd1	405.171	0.380781	0.0946844	4.02157	5.78103e-05	0.000770409	Coding
Gm17056	174.604	0.877012	0.218089	4.02135	5.78653e-05	0.000770422	Predicted
Kti12	142.118	-0.492565	0.122508	-4.02069	5.80291e-05	0.000771884	Coding
Psat1	261.448	-0.619867	0.15418	-4.02042	5.80948e-05	0.000772039	Coding
Brip1	79.4993	-0.723027	0.179953	-4.01787	5.87267e-05	0.000779711	Coding
Rnf19b	923.041	0.57542	0.143243	4.01708	5.89245e-05	0.000781611	Coding
2020-09-01	10.5825	3.57199	0.889403	4.01616	5.91531e-05	0.000783916	Coding
Nod2	85.8806	0.770628	0.191906	4.01565	5.92811e-05	0.000784884	Coding
Id2	3863.51	0.577504	0.143867	4.01416	5.96588e-05	0.000789154	Coding
Slc30a1	225.239	0.843355	0.210109	4.01389	5.97263e-05	0.000789315	Coding
Tmem131l	126.478	0.750548	0.187056	4.01242	6.00985e-05	0.000792767	Coding
Bri3	3146.58	0.362399	0.0903142	4.01264	6.00434e-05	0.000792767	Coding
Hist1h2bb	22.3562	-1.49681	0.373067	-4.01218	6.01601e-05	0.000792848	Coding
Slc25a20	121.257	0.650515	0.162247	4.0094	6.08738e-05	0.000801514	Coding
Rab32	563.893	0.553351	0.138042	4.00855	6.10918e-05	0.000803644	Coding
Upb1	9.88126	2.91122	0.726455	4.00743	6.1382e-05	0.000805977	Coding
Orai1	832.175	0.367351	0.091664	4.00759	6.13425e-05	0.000805977	Coding
Ppan	183.258	-0.602005	0.150292	-4.00556	6.18695e-05	0.000811633	Coding
Vamp4	703.241	0.257814	0.0643949	4.00364	6.23766e-05	0.000817534	Coding
Prmt5	143.955	-0.4779	0.119414	-4.00205	6.27966e-05	0.000822285	Coding
Gm2a	2659.3	0.450507	0.112594	4.00117	6.30288e-05	0.000823815	Coding
Nadk	716.799	0.435281	0.108785	4.00128	6.3e-05	0.000823815	Coding
Sbsn	5.03171	-2.86839	0.717037	-4.00034	6.32516e-05	0.000825971	Coding
Acod1	1141.34	1.11862	0.279835	3.99741	6.404e-05	0.000835503	Coding
Ndel1	711.226	0.500545	0.125259	3.99609	6.43978e-05	0.000839404	Coding
Capza2	5226.89	0.201201	0.0503664	3.99475	6.47627e-05	0.000843332	Coding
Ppp1r14b	2290.99	-0.427789	0.107093	-3.99455	6.48172e-05	0.000843332	Coding
Spsb1	108.438	-0.541323	0.135536	-3.99395	6.49802e-05	0.000843916	Coding
Ssb	1831.98	-0.256113	0.0641242	-3.99402	6.49625e-05	0.000843916	Coding
Vegfa	959.535	0.760958	0.190541	3.99366	6.506e-05	0.000844184	Coding
Isg15	4056.06	0.688758	0.172505	3.99268	6.53303e-05	0.000846922	Coding
Ccdc71l	400.499	0.351591	0.0880687	3.99223	6.54553e-05	0.000847006	Coding
Csprs	44.6831	0.839792	0.210355	3.99226	6.54479e-05	0.000847006	Coding
Rps27a-ps2	38.454	-0.938578	0.235176	-3.99095	6.58087e-05	0.000850808	Ribosomal
Pola1	114.383	-0.588749	0.147615	-3.98842	6.65145e-05	0.000859156	Coding
Ebi3	220.084	0.491493	0.123242	3.98804	6.66213e-05	0.000859758	Coding
Nrm	218.872	-0.596572	0.149662	-3.98612	6.7162e-05	0.000865173	Coding
Cd1d2	15.0855	1.47313	0.369547	3.98631	6.71086e-05	0.000865173	Coding
Parp14	774.523	0.436568	0.109544	3.98531	6.7391e-05	0.000866926	Coding
Nuf2	120.255	-0.739556	0.185575	-3.98521	6.74195e-05	0.000866926	Coding
Hnrnph2	700.651	0.267216	0.0670612	3.98465	6.75799e-05	0.000868207	Coding
Arf6	815.594	0.218444	0.05485	3.98256	6.81762e-05	0.000875081	Coding
Syce2	383.356	-0.517007	0.129848	-3.98164	6.84411e-05	0.000877693	Coding
Pomp	5790.24	0.183666	0.0461384	3.98077	6.86924e-05	0.000880125	Coding
Iglc2	10.3708	7.05939	1.77427	3.97876	6.92768e-05	0.000886817	Coding
Cisd1	620.401	-0.344989	0.0867316	-3.97766	6.95959e-05	0.000889454	Coding
Cyb5a	1375.93	0.538826	0.135464	3.97762	6.96073e-05	0.000889454	Coding
St18	15.9749	-1.53818	0.386856	-3.97612	7.00495e-05	0.000893754	Coding
Ctsz	13846.3	0.285609	0.0718322	3.97605	7.00689e-05	0.000893754	Coding
Mrpl15	849.999	-0.368997	0.0928184	-3.97547	7.0241e-05	0.000894352	Coding
Lpar6	304.734	0.431274	0.108481	3.97558	7.0209e-05	0.000894352	Coding
Tor3a	837.205	0.284271	0.0715102	3.97525	7.0305e-05	0.00089437	Coding
Lgalsl	51.2141	-0.834456	0.20996	-3.97436	7.05694e-05	0.000896934	Coding
AC123062.1	46.3541	0.992702	0.249792	3.97411	7.06432e-05	0.000897075	Noncoding
Aldh2	1189.06	0.354237	0.0891685	3.97267	7.1071e-05	0.000901706	Coding
Dek	1807.9	-0.245922	0.0619099	-3.97226	7.11942e-05	0.000902467	Coding
Ak1	15.6858	-1.89853	0.478067	-3.97126	7.1493e-05	0.000905451	Coding
Ddx5	4921.5	0.238504	0.0601159	3.9674	7.26597e-05	0.000919413	Coding
Lgals1	22103.4	-0.393498	0.0992644	-3.96414	7.36614e-05	0.000931262	Coding
Lmbrd1	468.887	0.426646	0.107637	3.96375	7.37811e-05	0.000931951	Coding
Nup37	200.537	-0.525398	0.132582	-3.96281	7.40725e-05	0.000934656	Coding
Luc7l	265.804	-0.400926	0.101176	-3.96264	7.41261e-05	0.000934656	Coding
Rrp9	181.024	-0.393701	0.0993994	-3.9608	7.47004e-05	0.000941067	Coding
Tonsl	1266.9	0.225171	0.0568602	3.96009	7.49224e-05	0.000943032	Coding
Nfkbid	213.763	0.730786	0.184594	3.95889	7.5299e-05	0.000946193	Coding
Hist1h3d	51.8688	-0.905839	0.228813	-3.95887	7.5306e-05	0.000946193	Coding
Gm43984	90.7948	0.633615	0.160076	3.95821	7.5512e-05	0.000947948	Predicted
Gm15500	1409.5	-0.323915	0.0818462	-3.95761	7.57033e-05	0.000949515	Predicted
Hmmr	290.953	-0.856605	0.216467	-3.9572	7.58334e-05	0.000950312	Coding
Tigd2	358.51	0.30732	0.0776972	3.95536	7.64209e-05	0.000956835	Coding
Coro1c	624.838	-0.324144	0.0819744	-3.95421	7.67881e-05	0.000960591	Coding
Ubb	16618.6	0.209149	0.0529014	3.95356	7.69979e-05	0.000962373	Coding
Clec2i	68.1541	1.04176	0.263565	3.95258	7.73116e-05	0.000965449	Coding
Hn1l	224.276	-0.415557	0.10516	-3.95167	7.76092e-05	0.000968319	Coding
Mettl16	180.277	-0.411002	0.104025	-3.95099	7.78287e-05	0.00096852	Coding
Rad51	126.882	-0.821755	0.207984	-3.95106	7.78062e-05	0.00096852	Coding
Mcrip2	130.976	-0.620733	0.157106	-3.95105	7.78089e-05	0.00096852	Coding
Cenpe	451.917	-0.937375	0.237277	-3.95056	7.7968e-05	0.000968567	Coding
Anp32e	1035.57	-0.522607	0.132281	-3.95075	7.79079e-05	0.000968567	Coding
Cav2	224.886	-0.452585	0.114602	-3.94918	7.84189e-05	0.000973321	Coding
Pkn3	29.0667	-1.16751	0.295741	-3.94774	7.88923e-05	0.000978347	Coding
Hnrnpu	2281.14	-0.234606	0.059437	-3.94714	7.90902e-05	0.00097995	Coding
Rnf213	844.532	0.479162	0.121406	3.94676	7.92149e-05	0.000980645	Coding
Pilrb1	122.434	0.539978	0.136837	3.94614	7.94222e-05	0.000982097	Coding
Rab43	92.2552	0.605212	0.153374	3.94599	7.94697e-05	0.000982097	Coding
mt-Atp8	739.948	-0.287995	0.0730383	-3.94308	8.04433e-05	0.000992412	Mitochondrial
Stip1	535.809	-0.321921	0.0816383	-3.94326	8.038e-05	0.000992412	Coding
Rad54l	50.5823	-0.887054	0.225053	-3.94152	8.09654e-05	0.000997991	Coding
Eefsec	111.273	-0.471508	0.119662	-3.94035	8.13636e-05	0.00100203	Coding
Ruvbl2	319.136	-0.408156	0.103603	-3.93961	8.16151e-05	0.00100427	Coding
Rps17	9599.96	-0.327328	0.0831126	-3.93837	8.20376e-05	0.0010086	Ribosomal
Fundc2	1103.92	-0.289228	0.073449	-3.93781	8.22293e-05	0.00101008	Coding
Shmt1	43.7936	-0.739591	0.187866	-3.93681	8.25723e-05	0.00101343	Coding
Arhgdib	8079.65	0.161534	0.0410433	3.93569	8.29578e-05	0.00101728	Coding
Arhgef3	153.781	0.47667	0.121132	3.93513	8.31521e-05	0.00101867	Coding
Atp2a2	644.877	-0.272552	0.0692645	-3.93495	8.32133e-05	0.00101867	Coding
Irak3	129.594	0.498578	0.126722	3.93443	8.33944e-05	0.00102001	Coding
Ftsj3	277.781	-0.434963	0.110618	-3.93211	8.42041e-05	0.00102903	Coding
Nasp	649.45	-0.567594	0.144398	-3.93075	8.46799e-05	0.00103308	Coding
Zc3h12a	269.599	0.619046	0.157481	3.93092	8.46212e-05	0.00103308	Coding
Jarid2	701.491	0.54789	0.139502	3.92747	8.58426e-05	0.00104459	Coding
Tmem33	595.974	0.226893	0.0577668	3.92774	8.57479e-05	0.00104459	Coding
Nabp1	149.631	0.716475	0.182423	3.92754	8.5818e-05	0.00104459	Coding
Eif3l	992.71	-0.395706	0.10076	-3.92719	8.59423e-05	0.00104491	Coding
Ninj1	2540.55	1.04783	0.266833	3.92691	8.60429e-05	0.00104525	Coding
Gemin6	145.223	-0.524515	0.133578	-3.92667	8.61292e-05	0.00104541	Coding
Il12b	25.2063	3.8359	0.977034	3.92607	8.63462e-05	0.00104715	Coding
Cggbp1	890.947	0.32284	0.0822353	3.92581	8.64396e-05	0.00104739	Coding
Hmgn1	1543.5	-0.517249	0.131789	-3.92483	8.67911e-05	0.00105076	Coding
Rpl41	40150	-0.282823	0.072064	-3.92461	8.68711e-05	0.00105084	Ribosomal
Nek2	60.9719	-0.899878	0.229417	-3.92246	8.76482e-05	0.00105934	Coding
Scpep1	1024.52	0.348715	0.0889172	3.92179	8.78937e-05	0.00106141	Coding
Aunip	30.7389	-0.908293	0.231704	-3.92006	8.85267e-05	0.00106815	Coding
Fcho2	387.564	0.323302	0.0825045	3.9186	8.9065e-05	0.00107374	Coding
Gm7432	17.6671	-1.13492	0.289916	-3.91464	9.05404e-05	0.00109061	Predicted
Rab19	49.4036	0.865517	0.221272	3.91156	9.17037e-05	0.00110369	Coding
Cnnm4	90.8837	-0.640835	0.163849	-3.91114	9.1863e-05	0.00110468	Coding
Atp11b	283.088	0.415078	0.106138	3.91074	9.20153e-05	0.00110558	Coding
Klf13	1116.68	0.40657	0.103991	3.90966	9.24258e-05	0.00110958	Coding
Gm3756	16.4365	-1.26205	0.322853	-3.90906	9.26558e-05	0.0011114	Predicted
Rps2	16631.7	-0.32965	0.0844156	-3.90509	9.41914e-05	0.00112888	Ribosomal
Gltp	867.787	0.261387	0.0669424	3.90465	9.43634e-05	0.00112999	Coding
Tpx2	448.614	-0.885128	0.226751	-3.90353	9.47996e-05	0.00113331	Coding
Rap2c	593.125	0.406117	0.104033	3.90371	9.47274e-05	0.00113331	Coding
Auh	308.224	0.478041	0.122497	3.90245	9.52227e-05	0.00113742	Coding
Sdc2	60.5671	1.0455	0.267939	3.90201	9.53986e-05	0.00113762	Coding
Adora2b	171.893	1.03697	0.26575	3.90205	9.53795e-05	0.00113762	Coding
Rpl7l1	806.806	-0.327644	0.0839808	-3.90142	9.56319e-05	0.00113945	Ribosomal
Il6	25.2096	2.24201	0.574815	3.9004	9.60333e-05	0.00114328	Coding
Foxp4	57.7051	0.681762	0.174825	3.89968	9.63182e-05	0.00114571	Coding
Cttn	54.515	-1.19833	0.307415	-3.8981	9.69521e-05	0.00115229	Coding
Eif2s2	2645.76	-0.246034	0.0631291	-3.89731	9.72652e-05	0.0011541	Coding
Cd276	48.5928	-0.899506	0.230798	-3.89737	9.72444e-05	0.0011541	Coding
Pvr	78.6195	0.670942	0.172164	3.89711	9.73469e-05	0.00115411	Coding
Stx4a	991.361	0.23471	0.060231	3.89683	9.74617e-05	0.00115451	Coding
Fst	7.17085	1.93497	0.496703	3.89563	9.79455e-05	0.00115928	Coding
Mdm1	56.7072	-0.655611	0.168307	-3.89532	9.80696e-05	0.00115979	Coding
Ugcg	274.93	0.435547	0.111869	3.89337	9.88616e-05	0.00116819	Coding
BC064078	257.004	0.523087	0.134363	3.89308	9.89804e-05	0.00116862	Noncoding
Ndufs2	1202.9	-0.285917	0.0734689	-3.89167	9.95564e-05	0.00117445	Coding
Smc2	743.256	-0.702184	0.180485	-3.89053	0.000100025	0.0011789	Coding
Derl1	928.585	0.215419	0.0553725	3.89035	0.000100099	0.0011789	Coding
Osm	668.311	0.872245	0.224312	3.88854	0.000100851	0.00118679	Coding
Gm21188	109.41	0.495935	0.127612	3.88626	0.000101801	0.00119698	Predicted
Plscr3	608.809	0.27215	0.0700677	3.8841	0.00010271	0.00120668	Coding
Cct8	2156.55	-0.287492	0.0740226	-3.88385	0.000102817	0.00120694	Coding
Gm37399	100.468	0.66024	0.170006	3.88363	0.000102909	0.00120702	Predicted
Epn2	16.814	-1.4118	0.363615	-3.88269	0.000103307	0.0012107	Coding
Chaf1b	141.282	-0.700847	0.180706	-3.87838	0.000105156	0.00123035	Coding
Orc2	152.935	-0.434312	0.111981	-3.87844	0.00010513	0.00123035	Coding
Clec4n	2233.32	0.822562	0.212171	3.87689	0.000105802	0.00123689	Coding
Dlgap5	176.012	-0.753702	0.194427	-3.87653	0.000105957	0.0012377	Coding
Hnrnpa3	3144.17	-0.226241	0.0583838	-3.87507	0.000106595	0.00124414	Coding
Serp1	2080.46	0.26716	0.0689546	3.87444	0.000106871	0.00124634	Coding
Cars	179.294	-0.42016	0.108477	-3.87327	0.000107386	0.00125132	Coding
Tcf25	1590.58	0.185142	0.0478182	3.87179	0.000108041	0.00125792	Coding
Mogs	267.732	-0.506098	0.130767	-3.87023	0.000108733	0.00126399	Coding
Rab8b	880.602	0.330322	0.0853497	3.87022	0.000108739	0.00126399	Coding
Ypel3	495.473	0.454229	0.117372	3.87	0.000108837	0.0012641	Coding
Spc24	408.663	-0.766125	0.19798	-3.86971	0.000108967	0.00126458	Coding
Cmc2	489.391	-0.350421	0.090588	-3.86829	0.0001096	0.0012702	Coding
Dab2	2318.49	-0.44825	0.11588	-3.86823	0.000109628	0.0012702	Coding
Txn1	16857.9	0.365132	0.0944011	3.86788	0.000109787	0.001271	Coding
Kctd9	65.9714	-0.562295	0.14546	-3.86563	0.000110804	0.00128174	Coding
Gm16014	21.1511	1.34302	0.347624	3.86344	0.0001118	0.00129222	Predicted
Rel	496.549	0.591386	0.1531	3.86275	0.000112119	0.00129485	Coding
Banf1	1194.26	-0.354163	0.0917206	-3.86133	0.000112773	0.00130135	Coding
Bach2os	69.6538	-0.744069	0.19273	-3.86068	0.00011307	0.00130268	Noncoding
Snrpd2	1680.45	-0.258829	0.0670397	-3.86083	0.000113003	0.00130268	Coding
H3f3a	16541.9	0.178067	0.0461384	3.85942	0.000113658	0.00130839	Coding
Gm5620	18.5246	-1.18252	0.306426	-3.85907	0.000113817	0.00130917	Predicted
Gm9132	17.7127	-1.08072	0.280098	-3.85836	0.00011415	0.00131195	Predicted
Cks2	879.863	-0.530541	0.137551	-3.85705	0.000114766	0.00131796	Coding
H2-T10	435.363	0.357581	0.0927234	3.85643	0.000115057	0.00132025	Coding
Marcksl1	1542	0.563588	0.14616	3.85595	0.00011528	0.00132174	Coding
Rif1	225.946	-0.4527	0.117432	-3.855	0.000115729	0.00132583	Coding
Dazap1	772.849	-0.254921	0.0661342	-3.85461	0.000115915	0.00132636	Coding
Dut	654.729	-0.734753	0.190628	-3.85438	0.000116021	0.00132636	Coding
Coro1b	1515.21	0.328242	0.0851622	3.85431	0.000116054	0.00132636	Coding
Gm15832	38.8749	0.83242	0.21606	3.85272	0.000116811	0.00133394	Predicted
Btla	37.2075	3.49324	0.906901	3.85184	0.000117234	0.00133771	Coding
Ddb1	590.245	-0.283089	0.0734999	-3.85156	0.000117369	0.00133817	Coding
Fam149a	33.2958	0.820475	0.213102	3.85016	0.000118042	0.00134478	Coding
Sfmbt2	24.3344	0.93618	0.243206	3.84933	0.000118443	0.00134827	Coding
Slc37a2	710.632	-0.542099	0.140838	-3.8491	0.000118553	0.00134845	Coding
Cd1d1	149.531	1.48795	0.386641	3.84841	0.000118889	0.00135119	Coding
Cacnb2	4.89582	-2.80324	0.728484	-3.84804	0.000119066	0.00135213	Coding
Epsti1	610.591	0.648033	0.168426	3.84759	0.000119286	0.00135355	Coding
C4b	512.594	0.767361	0.199584	3.8448	0.00012065	0.00136795	Coding
Gmpr	39.3742	-1.10389	0.287175	-3.84395	0.00012107	0.00137161	Coding
Thop1	137.986	-0.436411	0.113539	-3.84373	0.00012118	0.00137178	Coding
mt-Nd5	3360.36	-0.198906	0.0517643	-3.84253	0.000121772	0.00137739	Mitochondrial
Poc1a	79.7651	-0.69243	0.180257	-3.84135	0.000122358	0.00138292	Coding
Ube2r2	721.974	0.238595	0.0621348	3.83996	0.000123054	0.00138968	Coding
Col14a1	282.321	-1.38201	0.359979	-3.83914	0.000123466	0.00139323	Coding
Phf21a	205.225	0.364815	0.0950349	3.83875	0.000123662	0.00139435	Coding
Malat1	131553	0.412877	0.107603	3.83705	0.000124522	0.00140293	Noncoding
Tex30	161.876	-0.480342	0.125263	-3.83467	0.000125734	0.00141436	Coding
Gdpd1	74.1348	0.98308	0.256358	3.83479	0.000125673	0.00141436	Coding
Rpl10a-ps1	714.274	-0.471761	0.123032	-3.83447	0.000125836	0.00141439	Ribosomal
Orc6	304.994	-0.625071	0.163101	-3.83242	0.00012689	0.00142512	Coding
Tsfm	359.902	-0.384596	0.100376	-3.83153	0.000127347	0.00142603	Coding
Lamp1	7424.73	0.359555	0.0938422	3.83149	0.000127371	0.00142603	Coding
Nxn	102.351	0.708355	0.184867	3.8317	0.000127259	0.00142603	Coding
Slc4a2	172.263	-0.635787	0.165928	-3.83171	0.000127254	0.00142603	Coding
Per1	145.068	0.902155	0.235483	3.83109	0.000127577	0.00142611	Coding
Dclre1c	170.661	0.510987	0.133375	3.83122	0.000127511	0.00142611	Coding
Gm38050	136.867	0.566578	0.147924	3.8302	0.000128039	0.00143016	Predicted
Hnrnpm	1212.32	-0.187903	0.0490674	-3.82949	0.000128408	0.00143315	Coding
Pgap2	517.511	0.35041	0.0915298	3.82836	0.000128997	0.00143861	Coding
Pold1	116.477	-0.687797	0.179703	-3.82741	0.0001295	0.00144309	Coding
Fam167b	150.765	0.61733	0.161317	3.82682	0.000129809	0.00144541	Coding
Hsd11b1	13.8497	1.59175	0.416025	3.82611	0.000130187	0.0014475	Coding
Fam43a	48.2327	1.15777	0.302601	3.82608	0.0001302	0.0014475	Coding
Mybl2	61.4064	-0.857242	0.224135	-3.82467	0.000130945	0.00145465	Coding
Map3k1	475.011	0.442673	0.11576	3.82405	0.000131278	0.00145608	Coding
Ccr5	3681.13	0.201336	0.0526478	3.8242	0.000131195	0.00145608	Coding
Myl6	9666.68	0.149647	0.039153	3.82212	0.000132309	0.00146639	Coding
Rab13	185.678	0.498714	0.130494	3.82176	0.000132505	0.00146741	Coding
Gm42671	54.7764	0.652727	0.17084	3.8207	0.000133075	0.00147145	Predicted
Leng8	261.419	0.464695	0.121622	3.8208	0.000133018	0.00147145	Coding
Cavin3	23.0626	-1.50703	0.394524	-3.81987	0.00013352	0.00147522	Coding
Hmgb2	5371.96	-0.618894	0.162041	-3.81937	0.000133792	0.00147709	Coding
Rab44	28.5661	1.49158	0.39058	3.81889	0.000134056	0.00147886	Coding
Ptp4a1	710.636	0.464206	0.12159	3.81781	0.00013464	0.00148336	Coding
Pi4k2a	321.095	0.32093	0.0840625	3.81775	0.000134672	0.00148336	Coding
BC055308	67.338	0.898351	0.235344	3.81718	0.000134984	0.00148566	Noncoding
Nudt22	297.283	-0.938688	0.246002	-3.81578	0.000135753	0.00149297	Coding
Serpind1	13.2379	-3.23067	0.846958	-3.81445	0.000136489	0.00149991	Coding
Nme1	2560.13	-0.298246	0.0782468	-3.81161	0.000138064	0.00151593	Coding
Gm5970	31.8733	1.07613	0.282342	3.81144	0.000138159	0.00151593	Predicted
Scn1b	85.955	0.78673	0.206503	3.80977	0.000139094	0.00152385	Coding
Rps15a-ps7	177.24	-0.399205	0.104781	-3.80989	0.000139026	0.00152385	Ribosomal
Adcy6	7.48121	3.48324	0.914697	3.80808	0.000140051	0.00153316	Coding
Gm37534	18.0164	-1.1056	0.290465	-3.80632	0.000141052	0.00154293	Predicted
Tmem51	403.539	0.459453	0.120797	3.80352	0.000142653	0.00155925	Coding
Gda	829.41	0.557626	0.146647	3.8025	0.000143241	0.00156448	Coding
A130071D04Rik	653.308	0.400879	0.105434	3.80217	0.000143432	0.00156537	Noncoding
Nde1	279.519	-0.49251	0.129593	-3.80045	0.000144436	0.00157474	Coding
Gm45855	21.4384	-1.03596	0.272598	-3.80032	0.000144511	0.00157474	Predicted
Zbtb7a	557.825	0.286753	0.0755088	3.79761	0.000146099	0.00158571	Coding
Slc39a14	192.487	-0.474731	0.125025	-3.79707	0.000146415	0.00158571	Coding
Brd2	1080.11	0.340815	0.0897586	3.79702	0.000146444	0.00158571	Coding
Nat10	66.4195	-0.61716	0.16251	-3.79767	0.000146065	0.00158571	Coding
Rps28	12321.3	-0.267609	0.07048	-3.79696	0.000146483	0.00158571	Ribosomal
Chtf18	46.4188	-0.819656	0.215813	-3.79799	0.000145876	0.00158571	Coding
Wdr46	185.217	-0.477703	0.125814	-3.7969	0.000146517	0.00158571	Coding
Slc7a5	132.088	-0.706794	0.186115	-3.79761	0.000146097	0.00158571	Coding
2510009E07Rik	172.238	-0.530441	0.139674	-3.79772	0.000146035	0.00158571	Coding
Efnb1	22.2056	-1.20417	0.317206	-3.79617	0.000146949	0.00158798	Coding
Naa50	1004	-0.293463	0.0773044	-3.79621	0.000146927	0.00158798	Coding
Rpf2	324.602	-0.373812	0.0985254	-3.79406	0.000148202	0.00160031	Coding
Fam110b	56.875	-0.675986	0.178182	-3.7938	0.00014836	0.00160081	Coding
Arf2	317.29	0.404691	0.106734	3.79157	0.0001497	0.00161404	Coding
Anp32b	4581.43	-0.415084	0.109542	-3.78928	0.000151084	0.00162433	Coding
Rrm2	489.694	-0.786005	0.207407	-3.78968	0.000150844	0.00162433	Coding
Id3	365.906	1.5036	0.396771	3.78958	0.000150902	0.00162433	Coding
Rer1	1563.25	0.195568	0.0516138	3.78905	0.000151222	0.00162433	Coding
Gm37390	103.552	0.548023	0.144631	3.78912	0.000151181	0.00162433	Predicted
Bscl2	541.944	0.291165	0.0768532	3.78858	0.000151511	0.00162609	Coding
Spon1	265.769	0.845366	0.223145	3.78841	0.000151613	0.00162609	Coding
Larp7	324.463	-0.409421	0.1081	-3.78743	0.000152214	0.0016313	Coding
Wdr18	404.121	-0.366585	0.0968078	-3.78673	0.000152645	0.0016347	Coding
Cd8a	16.2662	4.97812	1.31532	3.78473	0.000153873	0.00164661	Coding
Gm45204	11.8216	1.48314	0.391904	3.78445	0.000154048	0.00164725	Predicted
H2afx	898.585	-0.683037	0.180521	-3.78369	0.000154521	0.00165107	Coding
Gm5812	68.4815	-0.567387	0.150061	-3.78103	0.000156178	0.00166754	Predicted
Rps25	9897.13	-0.194513	0.0514538	-3.78035	0.000156608	0.00167087	Ribosomal
Kif15	160.235	-0.768675	0.203433	-3.77852	0.000157765	0.00168196	Coding
Sys1	1004.24	0.194559	0.0514997	3.77787	0.000158173	0.00168506	Coding
Vhl	243.626	0.380312	0.100677	3.77754	0.000158384	0.00168604	Coding
Agps	347.31	-0.293952	0.0778515	-3.7758	0.000159494	0.00169591	Coding
Cd8b1	11.9313	5.70445	1.51083	3.77572	0.000159548	0.00169591	Coding
Aldh18a1	105.173	-0.517127	0.137052	-3.77323	0.000161147	0.00171163	Coding
Pcgf5	418.245	0.320114	0.0848489	3.77276	0.000161454	0.00171362	Coding
1600014C10Rik	587.186	0.342785	0.0909238	3.77003	0.00016323	0.0017299	Coding
Nub1	406.197	0.310984	0.0824849	3.7702	0.000163119	0.0017299	Coding
Trim30b	32.2438	0.851908	0.226005	3.76942	0.000163628	0.00173284	Coding
Hspe1	4369.33	-0.273346	0.0725436	-3.76802	0.000164545	0.00174125	Coding
Ube2c	1678.51	-0.808949	0.214781	-3.76639	0.000165623	0.00175136	Coding
Calu	384.483	-0.322201	0.0855543	-3.76604	0.000165855	0.00175252	Coding
Zwilch	70.7671	-0.725261	0.192648	-3.76469	0.000166754	0.00176071	Coding
Emc6	926.514	-0.239059	0.0635053	-3.76439	0.000166955	0.00176153	Coding
Saa3	369.739	2.42736	0.644905	3.7639	0.000167281	0.00176367	Coding
Ppp1r15b	358.736	0.347941	0.0924641	3.76299	0.000167896	0.00176885	Coding
Pbk	173.813	-0.900618	0.23946	-3.76104	0.00016921	0.00178007	Coding
Sgo2a	138.925	-0.756585	0.201158	-3.76115	0.000169134	0.00178007	Coding
Abcb4	22.2964	-1.7728	0.471641	-3.75878	0.000170744	0.00179489	Coding
Gm8292	86.562	-0.63822	0.169807	-3.75852	0.000170925	0.00179546	Predicted
Polr2h	391.699	-0.393335	0.104677	-3.7576	0.000171554	0.00180075	Coding
BC023105	4.23584	2.71454	0.722542	3.75693	0.000172011	0.00180422	Noncoding
Ints1	125.114	-0.426385	0.113502	-3.75664	0.000172209	0.00180497	Coding
2020-03-02	505.23	0.258687	0.0688668	3.75634	0.000172419	0.00180585	Coding
Ppp2r3a	38.919	-1.00814	0.268417	-3.75587	0.00017274	0.00180789	Coding
Mnt	150.731	0.506698	0.134968	3.75422	0.000173881	0.0018185	Coding
Cd164	549.015	0.497792	0.132605	3.75396	0.000174063	0.00181906	Coding
Lrpap1	1340.98	0.233606	0.0622468	3.7529	0.000174804	0.00182547	Coding
Hist1h2ae	687.629	-1.35721	0.361699	-3.75231	0.000175209	0.00182837	Coding
Cmc1	772.805	0.219599	0.0585334	3.75169	0.000175647	0.00183161	Coding
Sgo1	80.9979	-0.801316	0.213611	-3.75129	0.000175926	0.00183318	Coding
Rps6-ps3	55.3494	-0.633227	0.168836	-3.75055	0.000176449	0.00183728	Ribosomal
Pdgfb	216.457	-0.411925	0.109848	-3.74995	0.000176868	0.00184031	Coding
Rap1a	2213.25	0.27953	0.0745928	3.74742	0.000178665	0.00185765	Coding
Prdx3	608.547	-0.231089	0.0616751	-3.74687	0.000179056	0.00186005	Coding
St13	1384.06	-0.20135	0.0537403	-3.74673	0.000179156	0.00186005	Coding
Cyp4v3	290.047	0.534393	0.142705	3.74475	0.000180574	0.0018734	Coding
Paics	629.187	-0.333746	0.0891313	-3.74443	0.000180801	0.0018744	Coding
Ost4	2445.63	0.147948	0.0395429	3.74146	0.000182957	0.00189538	Coding
Ipo11	110.278	-0.496061	0.132593	-3.74123	0.000183118	0.00189567	Coding
Cmss1	51.1946	-0.777368	0.207835	-3.74031	0.000183796	0.00190131	Coding
Slc11a1	1867.07	0.580519	0.155221	3.73994	0.000184061	0.00190173	Coding
AC125071.1	55.1489	0.761248	0.203548	3.73989	0.000184103	0.00190173	Noncoding
Ldlrad3	21.5362	1.49286	0.399253	3.73913	0.00018466	0.00190611	Coding
Sh3bp4	55.2141	0.635846	0.170095	3.73818	0.00018536	0.00191195	Coding
Ift172	378.368	0.388772	0.104016	3.7376	0.000185786	0.00191496	Coding
Ly75	28.9874	2.65391	0.710144	3.73715	0.000186118	0.001917	Coding
Rps25-ps1	168.726	-0.400342	0.107161	-3.73589	0.000187052	0.00192523	Ribosomal
Atxn7	222.519	0.349276	0.0935003	3.73556	0.000187302	0.00192635	Coding
Mlec	602.575	-0.354064	0.0947865	-3.73538	0.000187431	0.00192635	Coding
Acat1	546.754	-0.345518	0.0925171	-3.73464	0.000187985	0.00193067	Coding
Mrps25	683.478	-0.264862	0.0709257	-3.73436	0.000188191	0.00193139	Coding
Sfpq	1162.47	-0.301504	0.0807812	-3.73236	0.000189695	0.00194403	Coding
Mapk13	38.1294	1.14947	0.30798	3.7323	0.000189742	0.00194403	Coding
Tk1	494.359	-0.879887	0.235757	-3.73218	0.000189831	0.00194403	Coding
Mid1ip1	421.153	-0.434875	0.116533	-3.73177	0.000190139	0.00194579	Coding
Sertad3	171.266	0.4484	0.120192	3.7307	0.000190946	0.00195265	Coding
Gars	625.846	-0.338855	0.0908523	-3.72974	0.00019168	0.00195736	Coding
Spns2	25.8721	-1.26644	0.339547	-3.72979	0.000191638	0.00195736	Coding
Serpinb6b	234.605	2.19428	0.588362	3.72948	0.000191879	0.00195799	Coding
Neil3	97.9908	-0.897474	0.240705	-3.72852	0.000192607	0.00196401	Coding
Xcr1	101.595	2.47602	0.664114	3.7283	0.000192772	0.0019643	Coding
Dnajc9	354.967	-0.349254	0.0936828	-3.72805	0.000192967	0.00196488	Coding
Casp3	289.522	0.417522	0.112016	3.72734	0.00019351	0.001969	Coding
Adam19	22.1078	1.7512	0.469893	3.72681	0.000193916	0.00197174	Coding
Paqr5	8.95178	3.56768	0.957381	3.7265	0.000194158	0.00197279	Coding
Trpm2	161.266	0.532499	0.142945	3.7252	0.000195163	0.00198099	Coding
Gm8520	44.5237	-0.715008	0.191944	-3.72509	0.000195243	0.00198099	Predicted
Galnt6	126.404	-0.496987	0.133423	-3.7249	0.000195396	0.00198114	Coding
Pdcd10	1391.51	0.183918	0.0494084	3.72241	0.00019733	0.00199933	Coding
Polr1a	79.3529	-0.523751	0.140725	-3.7218	0.000197811	0.00200278	Coding
Rp2	463.46	0.289524	0.0777998	3.7214	0.000198125	0.00200454	Coding
Tmem97	254.559	-0.429735	0.115497	-3.72073	0.000198647	0.0020084	Coding
Aph1c	259.56	0.462831	0.12443	3.71961	0.000199533	0.00201594	Coding
Rps16-ps2	836.675	-0.283316	0.076187	-3.71869	0.000200257	0.00202068	Ribosomal
Ndfip2	723.412	0.261794	0.0704001	3.71866	0.000200286	0.00202068	Coding
Esco2	138.854	-0.917642	0.24678	-3.71846	0.000200444	0.00202085	Coding
Vamp5	224.696	0.903992	0.243229	3.71663	0.000201896	0.00203406	Coding
Itgb5	1066.79	-0.551967	0.148576	-3.71506	0.000203158	0.00204143	Coding
Slfn5	1032.09	0.714184	0.192234	3.71518	0.000203057	0.00204143	Coding
Shcbp1	141.228	-0.771138	0.207569	-3.71509	0.000203132	0.00204143	Coding
Arap1	394.211	0.353689	0.0952075	3.71493	0.000203258	0.00204143	Coding
Tacc3	366.729	-0.678223	0.182572	-3.71483	0.000203343	0.00204143	Coding
Klra17	19.4944	1.27984	0.344606	3.71391	0.00020408	0.00204739	Coding
Prim1	148.156	-0.718904	0.193634	-3.7127	0.00020506	0.00205578	Coding
Irf7	2599.39	0.66831	0.180131	3.71012	0.000207158	0.0020739	Coding
Uba7	241.407	0.408217	0.110024	3.71027	0.00020704	0.0020739	Coding
Pik3r6	100.787	0.759733	0.204792	3.70978	0.000207443	0.00207516	Coding
Nudc	1316	-0.249032	0.0671314	-3.70962	0.000207574	0.00207516	Coding
Palld	177.5	0.578808	0.156044	3.70927	0.000207859	0.00207656	Coding
Spib	7.78987	3.71174	1.00078	3.70885	0.000208205	0.00207856	Coding
Notch1	198.289	0.412774	0.11131	3.70833	0.000208629	0.00207946	Coding
Stk38l	101.625	-0.499384	0.134663	-3.7084	0.000208573	0.00207946	Coding
Ska1	139.809	-0.711166	0.191782	-3.70821	0.000208732	0.00207946	Coding
Casp12	55.2873	0.682521	0.184115	3.70704	0.000209698	0.00208763	Coding
Lsm3	680.426	-0.252733	0.0682034	-3.70558	0.000210906	0.00209819	Coding
Nomo1	154.579	-0.494641	0.133501	-3.70515	0.000211268	0.00210033	Coding
Tle1	319.504	-0.597379	0.161258	-3.7045	0.000211811	0.00210427	Coding
Maml3	165.153	-0.531945	0.143715	-3.70138	0.000214432	0.00212882	Coding
Pkmyt1	104.505	-0.652652	0.176349	-3.7009	0.000214836	0.00213135	Coding
Hist1h3c	78.5781	-0.960941	0.259788	-3.69895	0.000216497	0.00214634	Coding
Ltbr	343.117	0.306575	0.0829066	3.69784	0.000217442	0.00215421	Coding
Gm6863	179.076	-0.451494	0.122105	-3.6976	0.000217648	0.00215466	Predicted
Atp2a1	11.2481	3.01893	0.816493	3.69743	0.000217789	0.00215466	Coding
Ciapin1	505.116	-0.292138	0.0790165	-3.69718	0.000218005	0.0021553	Coding
Gpr183	726.677	-0.739855	0.200212	-3.69536	0.000219576	0.00216934	Coding
Aurkb	364.497	-0.809267	0.219115	-3.69334	0.000221327	0.00218512	Coding
Borcs8	597.357	0.286679	0.0776275	3.69301	0.000221618	0.00218649	Coding
Mpv17l	18.7466	1.07196	0.29033	3.6922	0.00022232	0.00219191	Coding
Nup107	79.5571	-0.634505	0.171917	-3.69076	0.000223582	0.00220252	Coding
Cbfa2t3	111.126	1.88937	0.511938	3.69062	0.000223705	0.00220252	Coding
Bdh1	15.5562	-1.47856	0.400758	-3.68942	0.000224767	0.00221145	Coding
Gins1	89.3503	-0.738378	0.20016	-3.68894	0.000225188	0.00221407	Coding
Cd300lf	1101.31	0.362584	0.0983211	3.68775	0.000226245	0.00222293	Coding
Arf4	1237.7	0.308858	0.0837892	3.68613	0.000227691	0.00223406	Coding
Mob3c	148.785	0.520905	0.141312	3.68622	0.000227611	0.00223406	Coding
Hdac9	26.9685	1.04588	0.283807	3.68518	0.000228539	0.00224085	Coding
Clcf1	26.6371	1.12475	0.305391	3.683	0.000230504	0.00225856	Coding
Prss50	9.41186	-2.31435	0.628628	-3.68159	0.000231787	0.00226957	Coding
Rpl35a	4990.79	-0.236541	0.064261	-3.68094	0.000232372	0.00227374	Ribosomal
Slc9a3r1	460.933	0.353986	0.0962141	3.67915	0.000234012	0.00228823	Coding
Ttc39a	9.78885	2.63122	0.715283	3.67857	0.000234545	0.00229187	Coding
Mdh2	3247.51	-0.346954	0.0943235	-3.67834	0.00023476	0.0022924	Coding
Gm43362	218.094	0.421153	0.114534	3.67711	0.000235891	0.00230187	Predicted
Sqstm1	1044.07	0.510528	0.138856	3.67668	0.000236289	0.00230418	Coding
Trip13	124.454	-0.641452	0.174514	-3.67565	0.000237244	0.00231192	Coding
Ptafr	558.285	1.08369	0.294875	3.67508	0.000237771	0.00231547	Coding
Plaur	1209.06	0.708997	0.192977	3.67399	0.000238789	0.0023238	Coding
Smc1a	832.627	-0.353183	0.0961364	-3.67377	0.000238997	0.00232424	Coding
Tnfrsf26	35.9767	0.751092	0.204471	3.67334	0.000239404	0.00232662	Coding
Gspt2	18.2	1.25314	0.341199	3.67274	0.000239959	0.00232884	Coding
Pdcd11	140.976	-0.383261	0.10435	-3.67285	0.000239858	0.00232884	Coding
Ccdc34	563.299	-0.564324	0.153695	-3.67172	0.000240927	0.00233665	Coding
Hk2	1020.15	0.453585	0.123594	3.66996	0.00024259	0.00235118	Coding
Rpl15	3559.22	-0.213586	0.0582216	-3.66851	0.000243972	0.00236297	Ribosomal
Tmem128	525.406	0.245993	0.067062	3.66815	0.00024431	0.00236464	Coding
Slc6a8	206.817	-0.629419	0.171611	-3.6677	0.000244744	0.00236724	Coding
Ube2d3	3819.08	0.225601	0.061529	3.66658	0.000245817	0.00237601	Coding
Nop16	260.104	-0.524658	0.143149	-3.66513	0.000247214	0.00238712	Coding
Add3	120.918	0.713768	0.19475	3.66504	0.000247301	0.00238712	Coding
Mindy1	130.202	0.544757	0.14866	3.66446	0.000247863	0.00239093	Coding
Mthfd1	112.499	-0.496008	0.135411	-3.66299	0.000249286	0.00240303	Coding
Trim21	97.7176	0.491521	0.134192	3.66281	0.000249459	0.00240309	Coding
Gm12840	36.7506	1.10681	0.302233	3.66211	0.000250147	0.00240647	Predicted
Rpl15-ps5	31.2181	-0.883486	0.241249	-3.66213	0.000250126	0.00240647	Ribosomal
Slc1a5	221.412	-0.597594	0.163214	-3.66142	0.000250818	0.00241128	Coding
Dbf4	223.368	-0.388411	0.106087	-3.66125	0.000250985	0.00241128	Coding
Rpl13-ps3	37.9353	-0.742998	0.203004	-3.66002	0.000252199	0.00241969	Ribosomal
Dazap2	2318.81	0.226122	0.061781	3.66005	0.000252167	0.00241969	Coding
Cxcl5	7.94542	2.54383	0.695361	3.6583	0.000253898	0.00243436	Coding
Adipor1	866.141	0.243586	0.0665886	3.65807	0.000254126	0.00243491	Coding
Lilr4b	2043.73	0.409299	0.111913	3.65731	0.000254881	0.0024381	Coding
Enpp5	14.4892	1.27918	0.349769	3.65721	0.000254971	0.0024381	Coding
Gm43329	94.1822	0.750404	0.205174	3.6574	0.000254788	0.0024381	Predicted
Ggh	695.558	0.313464	0.0857305	3.65639	0.00025579	0.00244429	Coding
Hsd17b11	596.236	0.302667	0.0827917	3.65577	0.000256413	0.00244861	Coding
Rps10-ps2	1066.45	-0.237437	0.0649664	-3.65476	0.00025742	0.00245658	Ribosomal
Immt	802.923	-0.300183	0.0821532	-3.65394	0.000258246	0.00246282	Coding
Tcn2	651.787	0.338137	0.0925501	3.65356	0.000258633	0.00246486	Coding
Myo1b	72.0743	-1.90766	0.522191	-3.65319	0.000259006	0.0024652	Coding
Dctd	24.82	-1.02817	0.281444	-3.65318	0.000259014	0.0024652	Coding
Cdca8	703.024	-0.764119	0.209204	-3.65251	0.000259692	0.00247001	Coding
Las1l	212.131	-0.44659	0.122295	-3.65175	0.000260464	0.00247571	Coding
Ptbp1	845.594	-0.257425	0.0705083	-3.65099	0.000261232	0.00248136	Coding
Whamm	178.23	0.461434	0.126429	3.64975	0.000262494	0.00249169	Coding
Cdca7	108.629	-1.00234	0.274697	-3.64891	0.000263356	0.00249821	Coding
Atox1	7964.63	0.355055	0.0973174	3.64842	0.000263859	0.00249966	Coding
Rab9	543.831	0.344432	0.094402	3.64857	0.000263705	0.00249966	Coding
Coa5	849.409	0.38645	0.10594	3.64782	0.000264473	0.0025008	Coding
Atp5g1	3355.06	-0.342243	0.0938219	-3.64779	0.000264504	0.0025008	Coding
Aimp2	305.024	-0.463039	0.126927	-3.64807	0.000264214	0.0025008	Coding
Jak2	301.907	0.554641	0.152072	3.64722	0.000265088	0.00250466	Coding
Fosb	313.734	1.17501	0.322337	3.64529	0.000267089	0.0025219	Coding
Tor1aip1	1251.74	0.227952	0.0625778	3.6427	0.000269796	0.0025441	Coding
Rnd3	151.886	0.678656	0.186299	3.64283	0.000269655	0.0025441	Coding
Gm3375	44.9944	-0.667999	0.183416	-3.64199	0.00027054	0.00254828	Predicted
Eif1ax	1252.93	-0.199329	0.0547316	-3.64193	0.000270597	0.00254828	Coding
Myd88	535.683	0.41032	0.112695	3.64097	0.000271613	0.00255617	Coding
Rps24-ps3	391.224	-0.315287	0.0866011	-3.64068	0.000271914	0.00255669	Ribosomal
9130208D14Rik	74.5139	0.539383	0.148159	3.64058	0.000272026	0.00255669	Noncoding
Htr1b	5.01599	-3.4767	0.955305	-3.63936	0.000273317	0.00256713	Coding
Tbrg1	651.87	-0.280631	0.0771607	-3.63697	0.000275866	0.00258937	Coding
Plxdc2	154.957	0.76075	0.209316	3.63446	0.000278561	0.00261295	Coding
Sgk1	1090.28	0.539993	0.14859	3.63412	0.000278928	0.00261468	Coding
Ctla2b	60.3159	-0.699369	0.192455	-3.63392	0.000279143	0.00261497	Coding
Eva1b	419.533	0.595524	0.163902	3.63342	0.000279689	0.00261837	Coding
Ccl8	10157.8	1.43433	0.394852	3.63258	0.000280602	0.0026252	Coding
Myo7a	110.109	-0.438716	0.120872	-3.62958	0.000283878	0.00265411	Coding
Kcnn4	949.026	-0.520898	0.143648	-3.62622	0.000287597	0.00268361	Coding
Tmem55b	484.889	0.265497	0.0732099	3.62651	0.000287275	0.00268361	Coding
Ttc27	59.2362	-0.57352	0.158158	-3.62624	0.000287577	0.00268361	Coding
Pim3	248.807	0.978326	0.269814	3.62593	0.000287927	0.00268494	Coding
Chic2	740.609	0.26333	0.0726373	3.62527	0.000288658	0.00269	Coding
Rnf122	18.7696	1.2876	0.355228	3.62471	0.00028929	0.00269413	Coding
Pfdn5	5955.26	0.166708	0.046009	3.62338	0.000290774	0.00270618	Coding
Sla2	12.3279	4.1801	1.1539	3.6226	0.00029166	0.00271267	Coding
Gm37033	421.467	0.452238	0.124853	3.62216	0.000292154	0.0027155	Predicted
Pip4k2b	116.403	-0.468341	0.129327	-3.62137	0.000293044	0.002722	Coding
Gng2	1901.08	0.288025	0.0795661	3.61995	0.000294662	0.00273347	Coding
Rhov	247.261	0.657236	0.181559	3.61995	0.000294655	0.00273347	Coding
Fkbp11	37.7238	-1.57986	0.436473	-3.61961	0.000295048	0.0027335	Coding
Nt5dc2	289.614	-0.516347	0.142647	-3.61976	0.000294877	0.0027335	Coding
Iqgap2	105.109	0.728527	0.201408	3.61717	0.000297846	0.00275763	Coding
Gm6274	222.861	-0.354244	0.0979469	-3.6167	0.000298387	0.0027592	Predicted
Endod1	223.205	-0.448452	0.123995	-3.61668	0.000298402	0.0027592	Coding
Fcgrt	805.579	0.523357	0.144772	3.61504	0.000300297	0.00277313	Coding
Lpcat2	927.871	0.26038	0.0720247	3.61515	0.000300169	0.00277313	Coding
Arap3	98.111	-0.634625	0.175568	-3.61471	0.000300687	0.00277495	Coding
Rfx5	63.6206	0.573057	0.158542	3.61454	0.000300885	0.00277498	Coding
Spi1	3609.33	0.152241	0.0421257	3.61398	0.000301532	0.00277916	Coding
Dis3	77.1251	-0.526814	0.145798	-3.61332	0.000302307	0.0027845	Coding
Bcar3	116.507	-0.858313	0.237572	-3.61285	0.000302853	0.00278773	Coding
Cmah	6.3863	2.64897	0.733249	3.61265	0.000303081	0.00278803	Coding
Parp9	505.67	0.328575	0.0909668	3.61203	0.000303807	0.00279291	Coding
Mbd2	2102.01	0.23608	0.0653752	3.61115	0.000304844	0.00279405	Coding
Arl4a	225.312	0.34207	0.0947125	3.61167	0.000304233	0.00279405	Coding
Ms4a4c	4851.69	0.484231	0.134085	3.61137	0.000304589	0.00279405	Coding
Cbl	745.78	0.235659	0.0652598	3.61109	0.000304909	0.00279405	Coding
Pclaf	1446.35	-0.797831	0.220931	-3.61122	0.000304762	0.00279405	Coding
Rpl18-ps2	492.718	-0.306359	0.0849369	-3.60691	0.000309869	0.00283769	Ribosomal
Tcp1	1568.15	-0.311957	0.0864948	-3.60666	0.000310165	0.00283858	Coding
Klrb1f	11.8358	1.48577	0.412016	3.60609	0.000310845	0.0028423	Coding
Tmem134	1321.77	0.266292	0.0738473	3.60599	0.00031097	0.0028423	Noncoding
Rnf149	604.043	0.475842	0.131978	3.60547	0.000311594	0.00284619	Coding
Tm2d1	519.181	0.286237	0.0794273	3.60377	0.000313636	0.00286301	Coding
Rgl1	281.772	0.608662	0.16899	3.60177	0.000316053	0.00288191	Coding
Tob2	338.787	0.521878	0.144897	3.60173	0.000316111	0.00288191	Coding
Bbs9	41.112	-1.09513	0.304152	-3.60061	0.000317475	0.0028925	Coding
Exosc1	237.958	-0.308983	0.0858318	-3.59986	0.00031839	0.00289899	Coding
Fam136a	245.605	-0.446452	0.124062	-3.5986	0.000319929	0.00291115	Coding
Cabp4	14.7338	1.29829	0.361087	3.5955	0.000323768	0.00294421	Coding
Pilrb2	223.463	0.535253	0.148884	3.5951	0.000324263	0.00294684	Coding
Nxt1	423.103	-0.298321	0.0830097	-3.59381	0.000325872	0.00295957	Coding
Slc43a3	104.653	-0.586884	0.163316	-3.59355	0.000326198	0.00296065	Coding
Rbpms	60.1454	0.68338	0.1902	3.59296	0.000326938	0.0029636	Ribosomal
Nav2	83.1748	-0.697854	0.194224	-3.59304	0.000326837	0.0029636	Coding
Sh3pxd2a	45.6105	-0.825183	0.229726	-3.59203	0.00032811	0.00297234	Coding
Ankrd66	39.2393	0.690607	0.192276	3.59175	0.000328461	0.00297363	Coding
Aen	199.915	-0.370879	0.103302	-3.59026	0.000330354	0.00298888	Coding
Mrpl51	1249.13	-0.306336	0.0853752	-3.58811	0.000333084	0.00301167	Coding
Rsl1d1	887.134	-0.392888	0.109507	-3.58781	0.000333469	0.00301325	Coding
Igf2bp3	42.2784	0.803007	0.223926	3.58604	0.000335737	0.00303182	Coding
Tars2	136.314	-0.445726	0.124307	-3.5857	0.000336176	0.00303387	Coding
Ckb	5155.86	-0.453398	0.126465	-3.58516	0.000336873	0.00303823	Coding
Eif2b3	234.248	-0.449007	0.125258	-3.58467	0.000337504	0.00304201	Coding
Cenpa	885.841	-0.514012	0.143402	-3.58442	0.000337831	0.00304303	Coding
Prep	158.743	-0.373427	0.10423	-3.58272	0.000340038	0.00306099	Coding
Ruvbl1	393.738	-0.388582	0.108476	-3.5822	0.000340717	0.00306516	Coding
Slc30a5	177.423	-0.346205	0.0966636	-3.58154	0.000341575	0.00307095	Coding
2510016D11Rik	23.9954	-0.954869	0.266681	-3.58057	0.000342842	0.0030804	Noncoding
H3f3b	21340	0.317198	0.0885952	3.58031	0.000343184	0.00308102	Coding
Serpinb2	11.2432	2.73916	0.765159	3.57986	0.000343773	0.00308102	Coding
Scarf1	134.102	0.711053	0.198623	3.57991	0.000343717	0.00308102	Coding
Nt5c	1298.3	0.230204	0.0643014	3.58008	0.000343494	0.00308102	Coding
Cenpw	377.585	-0.548401	0.153204	-3.57955	0.000344189	0.00308144	Coding
Hist1h2af	16.4462	-1.19912	0.334996	-3.5795	0.000344252	0.00308144	Coding
Notch2	316.168	0.462445	0.129204	3.57919	0.000344662	0.00308318	Coding
Wsb1	655.57	0.28412	0.0794045	3.57814	0.00034605	0.00309366	Coding
Phldb1	38.347	-0.790786	0.22104	-3.57756	0.000346815	0.00309856	Coding
Fcor	62.6142	0.964377	0.269579	3.57735	0.000347099	0.00309916	Coding
Srrt	376.855	-0.314865	0.0880695	-3.57519	0.000349975	0.00312288	Coding
Ctps	89.6085	-0.680831	0.190491	-3.57408	0.000351461	0.00313419	Coding
Slc43a2	642.813	0.408568	0.114356	3.57278	0.000353213	0.00314785	Coding
BC035044	54.5362	1.06665	0.298585	3.57236	0.000353775	0.00315089	Coding
Tkt	2412.34	-0.247292	0.0692413	-3.57145	0.000355006	0.00315792	Coding
Timm10	500.965	-0.265117	0.0742314	-3.57149	0.00035495	0.00315792	Coding
Gm10029	137.61	-0.410824	0.11506	-3.57053	0.000356254	0.00316704	Predicted
Smim5	19.6729	3.00162	0.84073	3.57026	0.000356633	0.00316845	Coding
Art2b	8.16228	2.12221	0.594457	3.57001	0.000356973	0.00316949	Coding
Mfsd7a	39.0784	0.829189	0.232424	3.56757	0.00036031	0.00319713	Coding
Notch4	63.9719	-0.843045	0.236326	-3.5673	0.000360678	0.00319842	Coding
Carmil1	73.1237	-0.705163	0.197685	-3.56711	0.000360942	0.00319877	Coding
2610318N02Rik	48.6166	-0.771003	0.216297	-3.56456	0.000364473	0.00322806	Coding
Arhgef39	48.3217	-0.834699	0.23432	-3.56222	0.000367729	0.00325337	Coding
Rps8	37481.5	-0.31402	0.0881538	-3.56218	0.000367786	0.00325337	Ribosomal
Rad54b	22.2429	-1.01517	0.285066	-3.56116	0.000369216	0.00326198	Coding
Cad	78.6018	-0.669703	0.188053	-3.56124	0.000369114	0.00326198	Coding
Wdr37	168.093	0.341619	0.0959334	3.561	0.000369448	0.00326201	Coding
Mtap	230.628	-0.362611	0.101838	-3.56067	0.000369914	0.0032641	Coding
Pold2	149.79	-0.494738	0.138978	-3.55983	0.000371099	0.00327255	Coding
2310001H17Rik	142.673	0.58988	0.165729	3.5593	0.000371842	0.00327708	Noncoding
Ckap2	89.9931	-0.809323	0.227429	-3.55857	0.000372882	0.00328223	Coding
Sema6b	56.1435	-0.693099	0.194769	-3.55856	0.000372887	0.00328223	Coding
Atp5a1	3821.95	-0.245267	0.0689382	-3.55778	0.000373997	0.00328998	Coding
Diaph1	1108.12	0.312697	0.08794	3.5558	0.000376834	0.00331289	Coding
Snrpf	1788.63	-0.284432	0.079996	-3.55557	0.000377155	0.00331367	Coding
Nup205	127.766	-0.532542	0.14984	-3.55406	0.000379337	0.00332696	Coding
Ppm1g	573.927	-0.248365	0.0698826	-3.55404	0.000379365	0.00332696	Coding
Soat1	973.653	0.319792	0.0899798	3.55404	0.000379361	0.00332696	Coding
Rpl21	10660.4	-0.242383	0.0682096	-3.55351	0.000380126	0.00333158	Ribosomal
2310022A10Rik	185.637	0.441364	0.12423	3.55279	0.000381169	0.00333867	Coding
Sh3bgr	6.82238	6.44269	1.81351	3.55262	0.000381418	0.00333881	Coding
Taf7	221.899	0.493579	0.138978	3.55149	0.000383054	0.00335107	Coding
Nusap1	445.911	-0.851213	0.239704	-3.55109	0.000383635	0.00335411	Coding
Tbcc	255.371	-0.301393	0.084888	-3.55047	0.00038454	0.00335996	Coding
Tcf12	193.875	-0.37356	0.10523	-3.54993	0.000385335	0.00336485	Coding
Marveld1	39.5202	-0.827706	0.233335	-3.54728	0.000389228	0.00339677	Coding
Nudcd2	616.376	-0.374287	0.10559	-3.54472	0.000393025	0.00342409	Coding
Cstf2	126.183	-0.475181	0.134054	-3.54469	0.000393078	0.00342409	Coding
Atg12	255.571	0.319005	0.0899941	3.54474	0.000393008	0.00342409	Coding
Mrpl35	777.531	-0.229031	0.0646201	-3.54427	0.000393709	0.0034275	Coding
Sac3d1	118.955	-0.425691	0.120135	-3.54343	0.000394953	0.00343624	Coding
Gm6472	1207.74	-0.326154	0.0920664	-3.54259	0.000396219	0.00344515	Predicted
Pds5a	300.87	-0.320366	0.090447	-3.54203	0.00039706	0.00344827	Coding
P2rx4	611.022	0.472457	0.133385	3.54207	0.000397003	0.00344827	Coding
Cpne3	386.274	0.313307	0.0884698	3.5414	0.000398016	0.00345447	Coding
Scoc	232.958	-0.400639	0.113149	-3.5408	0.00039891	0.00346013	Coding
Bub1	173.04	-0.717326	0.202622	-3.54022	0.000399791	0.00346567	Coding
Ccnb2	508.481	-0.842055	0.237923	-3.53919	0.000401364	0.00347719	Coding
Extl3	375.194	-0.508816	0.143813	-3.53803	0.000403121	0.00348818	Coding
Polr2e	818.711	-0.300737	0.0849998	-3.5381	0.000403022	0.00348818	Coding
Elof1	918.595	-0.24217	0.0685022	-3.53521	0.000407449	0.0035235	Coding
Ddx18	404.378	-0.316671	0.0895914	-3.53461	0.000408376	0.00352938	Coding
Clec10a	86.1137	1.24846	0.353333	3.53339	0.000410261	0.00354352	Coding
Zmiz1	513.173	-0.228015	0.0645348	-3.53321	0.000410545	0.00354383	Coding
Hnrnph1	642.202	-0.244102	0.0691083	-3.53216	0.000412176	0.00355576	Coding
Gpr162	27.8624	1.30343	0.369141	3.53098	0.000414028	0.00356958	Coding
Mcm7	326.542	-0.692996	0.196279	-3.53067	0.000414508	0.00357157	Coding
Nup93	240.858	-0.303864	0.0860726	-3.53032	0.00041506	0.00357417	Coding
Adora3	59.7052	0.658599	0.186637	3.52878	0.000417486	0.0035929	Coding
Gm13710	41.9974	0.879258	0.24922	3.52804	0.000418652	0.00360049	Predicted
Timm13	2151.87	-0.222103	0.0629563	-3.5279	0.000418873	0.00360049	Coding
BC003965	306.926	-0.30084	0.0853248	-3.52583	0.000422162	0.00362658	Coding
St6gal1	44.4018	-0.759128	0.215358	-3.52496	0.000423544	0.00363627	Coding
Mboat7	191.822	0.360676	0.102333	3.52453	0.000424228	0.00363995	Coding
Ctnnb1	1124.86	0.343173	0.0973788	3.5241	0.000424916	0.00364367	Coding
Recql4	11.3145	-1.42154	0.403402	-3.52387	0.000425296	0.00364474	Coding
Daxx	401.595	0.48642	0.138047	3.52358	0.000425763	0.00364656	Coding
Ipo4	116.993	-0.481111	0.136622	-3.52149	0.000429133	0.00367321	Coding
H2-Ea-ps	834.923	0.438194	0.12445	3.52104	0.000429854	0.00367718	Noncoding
Slc8b1	216.613	0.724743	0.205879	3.52023	0.00043117	0.00368574	Coding
Haus2	158.275	0.41468	0.117803	3.52011	0.000431371	0.00368574	Coding
Gm10288	929.694	-0.268724	0.0763502	-3.51962	0.000432166	0.00369033	Predicted
Gm4332	1379.8	-0.25332	0.0719932	-3.51866	0.000433727	0.00369999	Predicted
Tango6	16.8193	-1.02348	0.290876	-3.51861	0.000433815	0.00369999	Coding
Hist1h2ac	41.1546	-0.926186	0.263282	-3.51785	0.000435056	0.00370615	Coding
Nup85	147.504	-0.413289	0.117483	-3.51786	0.000435043	0.00370615	Coding
Psmg3	309.819	-0.301541	0.0857296	-3.51736	0.000435866	0.00371084	Coding
Rufy3	245.36	0.323434	0.0919711	3.51669	0.000436961	0.00371794	Coding
Klra3	35.8075	0.941843	0.267844	3.51638	0.00043747	0.00372006	Coding
Tnfrsf21	314.285	0.518534	0.147517	3.51509	0.000439613	0.00373605	Coding
5430420F09Rik	57.6006	-0.808134	0.229936	-3.51461	0.0004404	0.0037383	Noncoding
Zcchc24	287.561	0.414541	0.117946	3.51467	0.000440296	0.0037383	Coding
Ube2s	2267.29	-0.407874	0.116082	-3.51368	0.000441946	0.0037492	Coding
Chaf1a	124.069	-0.727127	0.206995	-3.51277	0.000443463	0.00375983	Coding
Utp11	730.666	-0.262072	0.0746151	-3.51232	0.000444215	0.00376397	Coding
Afap1	44.676	0.685221	0.195132	3.51158	0.000445457	0.00377226	Coding
Mgst3	445.646	-0.360664	0.10272	-3.51113	0.000446214	0.00377643	Coding
Gm45778	15.7694	1.71794	0.489385	3.51041	0.000447423	0.00378442	Predicted
Tfdp1	315.918	-0.396396	0.112936	-3.50992	0.000448239	0.00378908	Coding
Actn1	392.168	-0.667919	0.190384	-3.50828	0.000451019	0.00381033	Coding
2810025M15Rik	686.081	-0.60484	0.172429	-3.50775	0.000451905	0.0038133	Noncoding
Slc27a1	155.524	-0.408065	0.11633	-3.50783	0.000451769	0.0038133	Coding
Pgls	2229.26	-0.182407	0.0520044	-3.50754	0.000452275	0.00381417	Coding
Ece1	285.688	0.719356	0.205125	3.50691	0.000453344	0.00382093	Coding
Ptpro	214.114	0.446625	0.12738	3.50625	0.000454469	0.00382815	Coding
Il1rn	1506.12	0.61501	0.175449	3.50536	0.000455998	0.00383876	Coding
1500011B03Rik	194.395	0.435821	0.124388	3.50371	0.000458829	0.00385928	Coding
H2-Ob	37.2363	1.06411	0.303716	3.50362	0.000458975	0.00385928	Coding
Rgmb	121.154	0.503691	0.143787	3.50304	0.000459981	0.00386547	Coding
Naaa	2013.9	0.476906	0.136196	3.50162	0.000462434	0.0038838	Coding
Tank	412.778	0.308561	0.0881284	3.50127	0.000463055	0.00388509	Coding
Tmem109	624.098	-0.290285	0.0829097	-3.50122	0.000463132	0.00388509	Coding
Gpsm2	81.0186	-0.528947	0.151111	-3.50038	0.000464587	0.00389407	Coding
Pin1	776.004	-0.271696	0.0776211	-3.50029	0.000464748	0.00389407	Coding
Prdx6	1542.7	0.292627	0.083694	3.49639	0.000471602	0.00394918	Coding
Ube2b	1391.36	0.216277	0.0618846	3.49485	0.000474332	0.00396972	Coding
Rab7b	620.886	0.376817	0.107833	3.49445	0.000475043	0.00397334	Coding
Gm9794	1813.9	-0.231975	0.0663964	-3.49379	0.000476208	0.00398075	Predicted
Ndc80	215.091	-0.756401	0.216595	-3.49224	0.000478983	0.00400161	Coding
Kmo	38.64	1.60723	0.46025	3.49207	0.000479287	0.00400181	Coding
Ccnb1	364.514	-0.825047	0.23636	-3.49063	0.000481882	0.00402113	Coding
Card19	2063.28	0.371232	0.106365	3.49017	0.000482709	0.00402568	Coding
Dmkn	238.916	1.30518	0.373977	3.48999	0.000483034	0.00402604	Coding
Mrpl34	882.332	-0.271541	0.0778121	-3.4897	0.000483569	0.00402814	Coding
Slc22a18	21.8176	1.02925	0.294964	3.4894	0.0004841	0.00403021	Coding
Slc15a3	1913.27	0.314007	0.0899967	3.4891	0.000484658	0.00403251	Coding
Acvrl1	722.293	0.405823	0.116328	3.4886	0.000485557	0.00403764	Coding
Gm4149	396.308	-0.320667	0.0919324	-3.48808	0.000486504	0.00404316	Predicted
Stat4	17.3827	2.05834	0.590183	3.48762	0.000487335	0.00404771	Coding
Bbx	294.234	0.484069	0.138845	3.4864	0.000489573	0.00406394	Coding
Ddrgk1	1354.29	0.185145	0.0531144	3.48578	0.000490698	0.00407091	Coding
Nhsl2	34.9468	0.998666	0.286606	3.48446	0.000493134	0.00408875	Coding
Rpl39-ps	846.395	-0.270284	0.0775748	-3.48417	0.000493664	0.00409077	Ribosomal
Ints12	298.186	0.32832	0.0942805	3.48237	0.000496994	0.00411359	Coding
Hmgn5	247.908	-0.433056	0.124356	-3.48238	0.000496975	0.00411359	Coding
Impdh2	772.249	-0.483262	0.138783	-3.48215	0.000497409	0.00411464	Coding
Gm38055	35.4016	-0.815143	0.23419	-3.48069	0.000500116	0.00413464	Predicted
4833407H14Rik	7.87781	1.70726	0.490597	3.47997	0.000501468	0.00414342	Noncoding
P2ry12	154.153	-0.470099	0.135134	-3.47877	0.000503717	0.0041596	Coding
2010204K13Rik	31.5044	-0.75396	0.216749	-3.4785	0.000504222	0.00416136	Noncoding
Trim30a	1110.43	0.404147	0.116197	3.47811	0.000504971	0.00416514	Coding
Mcm10	62.6541	-0.671606	0.193153	-3.47707	0.000506934	0.00417891	Coding
Phf1	70.1264	0.621782	0.178834	3.47687	0.000507304	0.00417955	Coding
B130021K23Rik	65.891	0.833125	0.239747	3.47502	0.000510818	0.00420608	Noncoding
Cxcl2	4354.55	1.02616	0.295344	3.47447	0.000511856	0.00421219	Coding
Tcea3	10.9444	1.64779	0.474336	3.47389	0.000512965	0.0042189	Coding
Svil	258.192	0.532565	0.153397	3.4718	0.000516982	0.00424949	Coding
Zfp263	273.106	0.380868	0.109779	3.4694	0.000521619	0.00428508	Coding
Arl6ip5	1939.78	0.219509	0.0632727	3.46925	0.000521912	0.00428508	Coding
Xrcc5	13.7165	-1.20133	0.3463	-3.46904	0.000522328	0.00428603	Coding
C230096K16Rik	88.822	0.556495	0.160431	3.46876	0.000522863	0.00428796	Noncoding
Ndc1	116.68	-0.747897	0.215656	-3.468	0.000524341	0.00429761	Coding
Gm44045	51.309	0.664652	0.191763	3.46601	0.000528244	0.00432621	Predicted
Ypel5	347.693	0.337777	0.0974568	3.46591	0.000528436	0.00432621	Coding
Rnf144a	13.1661	1.30762	0.377307	3.46566	0.000528935	0.00432782	Coding
Mreg	6.33928	2.83408	0.817931	3.46494	0.000530348	0.00433441	Coding
Heatr3	108.204	-0.529807	0.152904	-3.46497	0.000530287	0.00433441	Coding
G3bp1	1236.76	-0.270971	0.0782307	-3.46374	0.000532716	0.00435127	Coding
Chek1	40.3909	-0.927864	0.267926	-3.46314	0.00053392	0.00435862	Coding
Acsbg1	7.88615	-1.85591	0.536308	-3.46054	0.000539101	0.0043984	Coding
Mrps28	590.951	-0.350304	0.101249	-3.45981	0.000540563	0.00440665	Coding
Itpr1	99.5051	0.482976	0.1396	3.45972	0.00054073	0.00440665	Coding
Tmed5	1002.91	0.257619	0.0744776	3.45902	0.000542151	0.00441572	Coding
Crtc3	238.67	0.450324	0.130202	3.45866	0.000542878	0.00441675	Coding
Cd180	575.845	0.249174	0.0720437	3.45865	0.000542896	0.00441675	Coding
Fabp4	20.8767	1.10614	0.319903	3.45775	0.00054471	0.00442899	Coding
Ccne2	43.0923	-0.807762	0.233648	-3.45718	0.000545858	0.0044358	Coding
Cyth1	474.015	0.359155	0.103982	3.45401	0.000552317	0.00448573	Coding
Nol7	1531.79	-0.207798	0.0601848	-3.45267	0.000555063	0.00450548	Coding
Hist1h2bj	30.4167	-0.868014	0.251501	-3.45134	0.000557812	0.00452265	Coding
Pdhb	443.815	-0.313537	0.0908419	-3.45146	0.000557563	0.00452265	Coding
Mcm3	398.862	-0.565193	0.163878	-3.44886	0.000562962	0.00456181	Coding
Ankrd33b	51.6194	1.04918	0.304265	3.44824	0.000564245	0.00456962	Coding
Twist1	13.4951	1.48695	0.431385	3.44693	0.000567002	0.00458934	Coding
Gdi1	213.574	0.359809	0.104395	3.44661	0.000567662	0.00458949	Coding
Cenph	135.096	-0.626023	0.181629	-3.44672	0.000567446	0.00458949	Coding
Fnbp1l	144.651	-0.704186	0.204394	-3.44525	0.00057054	0.00460754	Coding
Fscn1	84.9141	2.96977	0.861964	3.44536	0.000570304	0.00460754	Coding
Acot8	250.362	0.292085	0.0847858	3.44498	0.000571111	0.00460954	Coding
Smc4	1099.52	-0.539122	0.156525	-3.44433	0.000572478	0.00461797	Coding
Triobp	303.716	0.341464	0.0991472	3.44401	0.000573153	0.0046208	Coding
Nop14	276.749	-0.290859	0.0844581	-3.44382	0.000573548	0.00462138	Coding
Axl	846.599	-0.447322	0.129904	-3.44349	0.000574261	0.00462452	Coding
Znrf2	341.533	0.247807	0.0719986	3.44183	0.000577784	0.00465027	Coding
Mrpl41	355.15	-0.313847	0.0911942	-3.44153	0.000578444	0.00465295	Coding
Bop1	193.539	-0.366325	0.106457	-3.44107	0.000579415	0.00465814	Coding
Rcbtb2	490.99	0.450177	0.130852	3.44036	0.000580951	0.00466606	Coding
Agfg2	111.6	-0.431514	0.125434	-3.44018	0.000581337	0.00466606	Coding
Racgap1	417.524	-0.738138	0.214565	-3.44016	0.000581379	0.00466606	Coding
Adcy4	11.8626	1.5472	0.449796	3.43978	0.000582193	0.00466997	Coding
Glrx5	823.043	-0.340761	0.0990773	-3.43935	0.000583114	0.00467473	Coding
Rbmxl1	550.482	-0.304588	0.0885872	-3.43828	0.000585414	0.00469053	Coding
Arid4a	530.545	0.380653	0.110744	3.43722	0.000587714	0.00470368	Coding
Otud5	291.287	0.264494	0.0769493	3.43726	0.00058764	0.00470368	Coding
3830406C13Rik	366.584	0.259864	0.0756404	3.43551	0.000591434	0.00472816	Coding
Rab18	738.193	0.235759	0.0686237	3.43554	0.000591382	0.00472816	Coding
Lsm7	603.038	-0.303775	0.0884496	-3.43445	0.000593765	0.00474415	Coding
Eif1ad	685.248	-0.226206	0.0658954	-3.43281	0.000597361	0.00477021	Coding
Nup155	91.3129	-0.478718	0.139466	-3.43252	0.000598007	0.0047727	Coding
Ptprj	486.65	0.350037	0.102014	3.43126	0.000600795	0.00479227	Coding
Ubtf	453.881	-0.250754	0.0730968	-3.43044	0.000602598	0.00480397	Coding
Ampd2	67.3496	-0.535729	0.156248	-3.42872	0.000606441	0.00483191	Coding
Rab34	68.7481	-0.668996	0.195164	-3.42786	0.000608358	0.00484336	Coding
Mirt1	14.9854	1.22254	0.356658	3.42777	0.000608557	0.00484336	Noncoding
Fkbp5	130.433	-0.542134	0.158196	-3.42699	0.000610317	0.00485467	Coding
Cd177	41.2845	1.25725	0.366888	3.4268	0.000610748	0.00485539	Coding
I830077J02Rik	219.499	0.49383	0.144277	3.42279	0.000619809	0.00492469	Coding
Qsox1	411.514	-0.353286	0.103258	-3.42138	0.000623033	0.00494755	Coding
Vcan	222.158	0.861242	0.251755	3.42095	0.000624028	0.0049527	Coding
Ube2t	135.883	-0.643988	0.188286	-3.42025	0.000625626	0.00496262	Coding
Gm12466	40.6973	-0.634102	0.185445	-3.41936	0.000627688	0.00497622	Predicted
Prim2	107.153	-0.536148	0.156829	-3.41869	0.000629245	0.0049858	Coding
Nap1l1	1898.74	-0.250427	0.0732637	-3.41816	0.000630449	0.00499257	Coding
Txnip	1701.9	0.179298	0.0524663	3.41739	0.000632244	0.00500401	Coding
Mrto4	593.706	-0.394291	0.115457	-3.41504	0.000637726	0.0050446	Coding
Atad2b	198.698	0.363798	0.106533	3.41488	0.000638112	0.00504486	Coding
Fcrla	8.83275	3.01936	0.884225	3.41469	0.000638537	0.00504543	Coding
Fam60a	99.8128	-0.534396	0.156516	-3.41432	0.000639406	0.00504951	Coding
2810474O19Rik	932.244	0.298583	0.0874782	3.41323	0.000641985	0.00506707	Coding
Cdca3	445.396	-0.806428	0.236314	-3.41252	0.000643653	0.00507743	Coding
Bola2	1770.39	-0.261913	0.0767715	-3.4116	0.000645835	0.00509183	Coding
Nfkb2	296.734	0.508433	0.149059	3.41094	0.000647388	0.00510126	Coding
Plau	2060.47	-0.578414	0.169636	-3.40974	0.000650238	0.00512089	Coding
Cd300ld	295.551	0.270494	0.0793529	3.40874	0.000652629	0.00513689	Coding
Hnrnpa1	2990.51	-0.411508	0.120728	-3.40856	0.000653066	0.0051375	Coding
Ppm1h	162.347	0.362997	0.106516	3.40792	0.000654605	0.00514677	Coding
Slc25a4	2301.52	-0.304072	0.0893964	-3.40139	0.00067043	0.0052683	Coding
Ddost	1638.23	-0.241793	0.0711181	-3.39988	0.000674144	0.00528585	Coding
Hspa9	1055.85	-0.288369	0.0848144	-3.39999	0.000673874	0.00528585	Coding
Rtfdc1	1008.78	0.203172	0.059754	3.40014	0.000673523	0.00528585	Coding
Haspin	92.0266	-0.564894	0.16613	-3.40032	0.000673073	0.00528585	Coding
Bysl	152.59	-0.384316	0.113079	-3.39865	0.000677199	0.00530689	Coding
Dnajc5	665.681	0.269822	0.0794043	3.39807	0.00067862	0.00531511	Coding
Gm43323	148.581	0.555746	0.163571	3.39758	0.000679859	0.00531899	Predicted
Incenp	443.441	-0.686337	0.202003	-3.39766	0.00067965	0.00531899	Coding
Esd	4535.21	0.407401	0.119927	3.39708	0.000681088	0.00532568	Coding
D6Wsu163e	118.331	-0.520355	0.153205	-3.39646	0.000682635	0.00533486	Coding
Wfdc18	19.3905	1.29213	0.3805	3.39589	0.000684062	0.00534309	Coding
Abtb2	52.9357	0.587968	0.173163	3.39545	0.00068515	0.00534726	Coding
Ccno	9.48324	1.44457	0.425464	3.39528	0.000685575	0.00534726	Coding
C330027C09Rik	103.332	-0.807084	0.237711	-3.39523	0.000685718	0.00534726	Coding
Tnfaip8l2	1364.71	0.211129	0.0622045	3.39411	0.000688531	0.00536626	Coding
Parpbp	37.0662	-0.774244	0.228177	-3.39318	0.000690868	0.00538154	Coding
Vamp8	4374.06	0.262149	0.077267	3.39276	0.000691917	0.00538677	Coding
Hacd1	61.2621	-0.775265	0.228547	-3.39215	0.000693467	0.00539296	Coding
Dram2	580.04	0.233417	0.0688085	3.39227	0.00069317	0.00539296	Coding
Mum1	114.412	-0.449919	0.132648	-3.39184	0.000694257	0.00539617	Coding
Tpgs1	461.158	0.249994	0.073754	3.38956	0.000700038	0.00543814	Coding
Wbp2	462.293	0.250588	0.0739366	3.38923	0.00070088	0.00543877	Coding
Vrk3	261.369	0.346899	0.102349	3.38938	0.000700506	0.00543877	Coding
AL589871.2	8.82879	2.86858	0.846576	3.38844	0.000702907	0.00545153	Noncoding
Pole3	431.443	-0.256326	0.0756506	-3.38828	0.000703316	0.00545175	Coding
Mast2	110.341	-0.446644	0.131919	-3.38574	0.000709861	0.00549652	Coding
Frrs1	333.376	-0.278528	0.0822641	-3.38578	0.000709758	0.00549652	Coding
Gm17150	17.3936	-0.997463	0.294635	-3.38542	0.000710706	0.00550008	Predicted
Vamp2	185.814	0.460791	0.136122	3.38514	0.000711419	0.00550262	Coding
Ltc4s	56.3479	-0.802745	0.237231	-3.38382	0.000714854	0.0055232	Coding
Ptpa	484.941	-0.231438	0.0683951	-3.38384	0.00071479	0.0055232	Coding
Adgre5	495.522	0.676929	0.20029	3.37973	0.000725558	0.00560288	Coding
Slc3a2	2715.98	0.311051	0.092058	3.37886	0.000727873	0.00561771	Coding
Stx12	515.186	0.233306	0.0690566	3.37848	0.000728865	0.00562234	Coding
Ska3	48.5426	-0.881539	0.260964	-3.37801	0.000730126	0.00562902	Coding
Arhgef37	8.20492	1.7635	0.522087	3.37779	0.000730718	0.00563054	Coding
Usp1	389.29	-0.25876	0.0766339	-3.37658	0.000733943	0.0056493	Coding
Scand1	3708.36	0.257395	0.076228	3.37665	0.000733753	0.0056493	Coding
Enoph1	163.327	-0.344974	0.102176	-3.37627	0.000734768	0.00565261	Coding
Gm23722	26.6535	1.03791	0.307471	3.37565	0.000736424	0.0056623	Predicted
Cd300lg	18.8251	1.47266	0.436283	3.37548	0.000736877	0.00566273	Coding
9530078K11Rik	51.8106	0.732449	0.217014	3.37512	0.000737834	0.005664	Noncoding
Asrgl1	96.5069	-0.482579	0.142976	-3.37524	0.000737516	0.005664	Coding
4933404O12Rik	24.901	-0.877998	0.260163	-3.37479	0.000738712	0.00566769	Noncoding
Clspn	187.673	-0.823489	0.24411	-3.37344	0.000742349	0.00568679	Coding
Optn	29.5267	0.847661	0.251276	3.37342	0.000742396	0.00568679	Coding
Eif3c	1842.36	-0.151832	0.0450064	-3.37356	0.00074202	0.00568679	Coding
Pik3ip1	30.108	0.813105	0.241083	3.37272	0.000744291	0.0056936	Coding
Rpp40	97.4354	-0.521308	0.154569	-3.37265	0.00074448	0.0056936	Coding
Bnip3l	845.051	0.278712	0.0826329	3.3729	0.000743821	0.0056936	Coding
Gm13268	17.8329	-0.960811	0.284905	-3.37239	0.000745197	0.00569603	Predicted
Col18a1	12.5343	-1.37039	0.406448	-3.37161	0.000747303	0.00570527	Coding
Procr	142.656	1.44627	0.42897	3.3715	0.000747604	0.00570527	Coding
Dntt	6.23586	6.31158	1.87202	3.37153	0.000747515	0.00570527	Coding
Phb	646.095	-0.324341	0.0962119	-3.37111	0.000748652	0.00571022	Coding
Lsp1	1602.94	0.604489	0.179404	3.36944	0.000753221	0.00573894	Coding
Apba1	27.07	1.01164	0.300233	3.36951	0.000753022	0.00573894	Coding
Anln	135.134	-0.891705	0.264703	-3.3687	0.000755244	0.00574822	Coding
Gm10728	13.8403	-1.09838	0.326055	-3.3687	0.000755236	0.00574822	Predicted
Rps26	17552.4	-0.271317	0.0805905	-3.36662	0.000760966	0.00578869	Ribosomal
Cdc42se1	635.881	0.241655	0.0718069	3.36535	0.000764472	0.00581226	Coding
Cd48	1070.93	0.284143	0.084482	3.36335	0.000770019	0.00584511	Coding
Cd300c2	4053.09	0.273447	0.0813002	3.36342	0.000769818	0.00584511	Coding
Gpat3	235.686	0.515784	0.153353	3.36338	0.00076993	0.00584511	Coding
Ms4a4b	55.2716	1.02231	0.303972	3.36316	0.00077056	0.00584611	Coding
Ttc39c	133.001	0.542887	0.161483	3.36189	0.000774113	0.00586994	Coding
Nudt16	149.377	0.378012	0.112449	3.36163	0.00077485	0.00587242	Coding
Capn1	316.594	0.324335	0.0965113	3.36059	0.000777749	0.00589126	Coding
Spr	442.213	-0.309344	0.0920592	-3.36027	0.000778664	0.00589195	Coding
Anapc1	217.321	-0.296209	0.0881473	-3.36038	0.000778345	0.00589195	Coding
Lsm5	1373.31	-0.308195	0.091725	-3.35999	0.000779444	0.00589472	Coding
Gm15421	156.315	-0.410177	0.122123	-3.35872	0.000783047	0.00591884	Predicted
Gng12	930.46	0.404973	0.120607	3.35778	0.000785709	0.00593582	Coding
Spg21	1043.25	0.233518	0.0695586	3.35714	0.000787543	0.00594653	Coding
Tmem150b	40.3883	0.653223	0.1946	3.35676	0.000788627	0.00595157	Coding
Tgtp1	26.611	0.932528	0.277836	3.3564	0.000789643	0.00595609	Coding
Rps18	14516.3	-0.324189	0.0966141	-3.3555	0.000792203	0.0059691	Ribosomal
Ppp2r5a	526.025	0.289473	0.0862665	3.35557	0.000792017	0.0059691	Coding
Man2a1	600.145	0.330349	0.098467	3.35492	0.00079388	0.00597858	Coding
Ppat	106.143	-0.4866	0.145106	-3.35342	0.000798206	0.00600799	Coding
Atxn7l3b	653.262	0.263562	0.0786017	3.35313	0.000799024	0.00601099	Coding
Lrrk2	50.6972	0.818724	0.244193	3.35278	0.000800036	0.00601227	Coding
Ass1	2723.67	0.379893	0.113306	3.35281	0.00079995	0.00601227	Coding
Supt16	638.433	-0.22017	0.0657509	-3.34855	0.000812344	0.00610155	Coding
Pitpnm1	244.322	0.343907	0.102745	3.34718	0.000816371	0.00612857	Coding
Atg5	582.836	0.349387	0.104393	3.34686	0.000817332	0.00613256	Coding
Ripor2	47.9912	0.684617	0.204625	3.34571	0.000820714	0.00615032	Coding
Hck	1975.21	0.205687	0.0614795	3.34562	0.00082099	0.00615032	Coding
Stk40	233.375	0.54984	0.164338	3.34578	0.000820524	0.00615032	Coding
Ttll12	75.7984	-0.533576	0.159498	-3.34535	0.000821786	0.00615306	Coding
Bora	54.2855	-0.652107	0.194956	-3.34489	0.000823141	0.00615998	Coding
Ints3	115.587	-0.417891	0.124957	-3.34426	0.000825011	0.00616757	Coding
Cd109	83.6844	-1.05751	0.316216	-3.34426	0.000825019	0.00616757	Coding
Kif14	35.0165	-0.873513	0.261217	-3.34402	0.000825745	0.0061685	Coding
Ints13	93.7408	-0.459216	0.137328	-3.34393	0.000826008	0.0061685	Coding
Gm10925	129.811	-0.379071	0.113416	-3.34232	0.000830826	0.006198	Predicted
Prdm1	326.104	0.617001	0.184597	3.34242	0.000830501	0.006198	Coding
Mctp2	6.4257	2.47896	0.741757	3.34201	0.00083173	0.00620151	Coding
Xrcc6	120.123	-0.489041	0.146367	-3.34119	0.000834196	0.00621665	Coding
Cdc37	1621.64	-0.181784	0.0544157	-3.34065	0.00083582	0.00622551	Coding
Gm19026	4.507	-3.04468	0.91174	-3.33942	0.000839535	0.00624667	Predicted
Rps18-ps1	11.9131	-1.29395	0.387475	-3.33944	0.000839488	0.00624667	Ribosomal
Rpl13a	1076.91	-0.300292	0.0899316	-3.33912	0.000840442	0.00624898	Ribosomal
Cbx4	115.852	0.511227	0.153106	3.33903	0.000840722	0.00624898	Coding
Fyb	3165.27	0.261117	0.0782132	3.33853	0.000842239	0.00625701	Coding
Cmtm6	422.301	0.273899	0.0821276	3.33505	0.000852856	0.00633259	Coding
Igfbp7	5.95611	1.78525	0.535565	3.33339	0.000857939	0.00636702	Coding
Mrpl23-ps1	159.405	-0.386917	0.116098	-3.33268	0.000860123	0.00637465	Noncoding
Ankrd12	382.328	0.414247	0.124294	3.33279	0.000859809	0.00637465	Coding
Ppp1r14a	10.2594	2.7561	0.827005	3.33263	0.000860306	0.00637465	Coding
Ctsl	9456.2	0.630364	0.189166	3.33233	0.000861212	0.00637806	Coding
Pmpca	256.097	-0.302916	0.0909164	-3.33181	0.000862827	0.00638671	Coding
Rangap1	434.172	-0.387263	0.116257	-3.3311	0.000865042	0.00639979	Coding
Raet1d	16.0219	-1.21306	0.36428	-3.33002	0.000868385	0.00642119	Coding
Fbl	1116.31	-0.23669	0.0710816	-3.32983	0.000869	0.00642242	Coding
Ctsb	17573.8	0.424141	0.12743	3.32842	0.000873392	0.00645154	Coding
Gins2	254.024	-0.543741	0.163428	-3.32709	0.000877575	0.00647909	Coding
Ambp	19.0412	-1.04449	0.314106	-3.32527	0.000883331	0.00651821	Coding
Dhrs13	37.9578	-0.785293	0.236217	-3.32446	0.000885903	0.00652861	Coding
Crtap	121.597	-0.444106	0.13359	-3.32439	0.00088611	0.00652861	Coding
Gspt1	671.807	-0.257838	0.0775592	-3.3244	0.00088609	0.00652861	Coding
Ctps2	201.42	0.323218	0.0972421	3.32385	0.000887832	0.00653792	Coding
Nip7	413.411	-0.267685	0.0805481	-3.3233	0.000889596	0.00654754	Coding
Plek	2037.09	0.369083	0.111077	3.32276	0.000891309	0.00655339	Coding
Maf1	451.9	0.246028	0.0740413	3.32285	0.000891032	0.00655339	Coding
Surf6	67.1031	-0.507471	0.152741	-3.32244	0.000892348	0.00655766	Coding
Wdr4	88.166	-0.545865	0.164348	-3.3214	0.000895679	0.00657529	Coding
Piezo1	282.866	-0.328591	0.0989357	-3.32126	0.000896129	0.00657529	Coding
Vsir	1169.34	0.243144	0.0732032	3.32149	0.00089537	0.00657529	Coding
Cd14	5805.84	0.464168	0.139765	3.32107	0.000896746	0.00657645	Coding
Pdlim5	320.718	0.354775	0.106867	3.31979	0.000900863	0.00660325	Coding
Rab10	1089.39	0.27286	0.0822016	3.31941	0.00090209	0.00660546	Coding
Parp8	168.065	0.410036	0.123524	3.31948	0.00090186	0.00660546	Coding
Mrpl50	293.975	-0.311125	0.0937516	-3.31861	0.00090467	0.00662096	Coding
Blm	94.2522	-0.587207	0.176972	-3.31808	0.000906385	0.00663012	Coding
Gpr33	4.95425	2.8964	0.873084	3.31744	0.000908469	0.00664058	Coding
Utp6	167.572	-0.337141	0.10163	-3.31735	0.000908745	0.00664058	Coding
Gm2225	129.498	-0.378148	0.113997	-3.31718	0.000909294	0.0066412	Predicted
Chmp5	1161.55	0.175483	0.0529249	3.31569	0.000914172	0.00667341	Coding
Il1r2	218.217	0.849946	0.256595	3.3124	0.000924991	0.00674893	Coding
Zfp281	275.587	0.380709	0.114948	3.312	0.000926299	0.00675503	Coding
Lmnb1	964.176	-0.304397	0.0919146	-3.31173	0.000927195	0.00675812	Coding
Gm12185	54.2124	0.71829	0.216916	3.31138	0.000928371	0.00676324	Predicted
Psme2b	241.945	0.365081	0.110258	3.31116	0.000929103	0.00676512	Coding
Rab5c	2786.54	0.170371	0.0514692	3.31014	0.000932482	0.00678627	Coding
Smarca5	809.642	-0.187684	0.0567239	-3.30873	0.000937208	0.00681719	Coding
Eif2b1	220.037	-0.347301	0.10497	-3.30858	0.000937701	0.0068173	Coding
Plk4	135.54	-0.489666	0.148107	-3.30617	0.000945808	0.00687274	Coding
Nrros	899.536	0.334013	0.101036	3.30587	0.000946815	0.00687656	Coding
Rad51ap1	182.852	-0.774362	0.234275	-3.30536	0.00094854	0.0068841	Coding
Ncapg	169.238	-0.722391	0.218557	-3.30528	0.000948816	0.0068841	Coding
Pttg1	629.568	-0.587801	0.17798	-3.30263	0.000957835	0.006946	Coding
Rpl6l	271.377	-0.335446	0.101582	-3.30222	0.000959213	0.00695247	Ribosomal
Myo1f	667.483	0.294185	0.0891058	3.30153	0.000961601	0.00696624	Coding
Dusp2	297.512	0.682045	0.206658	3.30035	0.000965635	0.00698838	Coding
Nfe2	20.1362	1.3068	0.395953	3.30039	0.000965499	0.00698838	Coding
G0s2	225.673	1.21152	0.367142	3.29988	0.000967272	0.00699577	Coding
Ankrd13b	19.7101	-1.38338	0.419237	-3.29977	0.000967636	0.00699577	Coding
Fmnl3	173.321	-0.748431	0.226902	-3.29847	0.000972119	0.00702463	Coding
Cxcr4	611.045	0.646498	0.196135	3.29618	0.000980076	0.00707855	Coding
Cct7	1779.85	-0.252987	0.0767567	-3.29596	0.000980875	0.00708073	Coding
Zufsp	269.37	0.355513	0.107878	3.2955	0.000982484	0.00708877	Coding
Sipa1l1	105.559	0.414853	0.126015	3.2921	0.000994415	0.00717124	Coding
Degs1	800.36	0.24674	0.0749857	3.29049	0.00100013	0.00720879	Coding
Macf1	1037.87	-0.181159	0.0550601	-3.2902	0.00100117	0.00721265	Coding
Ets2	573.491	0.452312	0.137491	3.28974	0.00100279	0.00722067	Coding
Lmf2	172.986	-0.383593	0.116614	-3.28943	0.0010039	0.00722507	Coding
Rfc3	321.739	-0.388041	0.117993	-3.28869	0.00100656	0.00724056	Coding
Psmd7	1723.4	-0.17735	0.0539417	-3.28782	0.00100968	0.00725564	Coding
Ccdc125	27.8615	1.30501	0.396915	3.28789	0.00100941	0.00725564	Coding
Mms22l	76.0141	-0.513971	0.156395	-3.28637	0.00101487	0.00728932	Coding
Gm44283	88.4915	0.468818	0.142727	3.28472	0.00102084	0.00732849	Predicted
Hs3st1	6.41686	2.91374	0.887113	3.28452	0.00102157	0.00733005	Coding
AI846148	42.1598	0.593794	0.180798	3.2843	0.00102236	0.00733205	Coding
Matk	169.761	-0.75948	0.231356	-3.28274	0.00102803	0.00736901	Coding
Gm9530	13.0985	1.5706	0.478678	3.28113	0.00103393	0.00740175	Predicted
Fam117b	209.446	0.407184	0.124101	3.28107	0.00103415	0.00740175	Coding
Gatsl2	126.446	0.447967	0.136519	3.28134	0.00103314	0.00740175	Coding
Armcx6	11.8046	1.21086	0.369108	3.28051	0.00103618	0.00741091	Coding
Kif20a	132.542	-0.689078	0.210057	-3.28044	0.00103647	0.00741091	Coding
Zgrf1	34.2294	-0.736035	0.224467	-3.27903	0.00104163	0.00744037	Coding
[truncated: 15,329 more rows]

## Sheet: Tumor_Combo vs control
	baseMean	log2FoldChange	lfcSE	stat	pvalue	padj	type
Uba52	4946.02	0.841186	0.0383425	21.9387	1.10964e-106	1.57735e-102	Coding
Gm6977	614.304	0.76619	0.0617889	12.4001	2.6096e-35	1.85477e-31	Predicted
Rps10-ps1	1580.67	0.483189	0.0440464	10.97	5.32805e-28	2.52461e-24	Ribosomal
Rpl26	1691.37	0.467863	0.0447421	10.4569	1.3624e-25	4.84162e-22	Ribosomal
F830016B08Rik	425.758	0.937828	0.0918037	10.2156	1.68875e-24	4.80112e-21	Coding
Rps24-ps3	924.314	0.468198	0.0461632	10.1422	3.58798e-24	8.50053e-21	Ribosomal
Rpl19-ps11	1483.83	0.415189	0.0421189	9.85755	6.35849e-23	1.29123e-19	Ribosomal
Rps16-ps2	2129.59	0.39474	0.0412321	9.57362	1.03227e-21	1.83422e-18	Ribosomal
Rps27a-ps2	131.128	0.990435	0.105114	9.42253	4.40341e-21	6.95494e-18	Ribosomal
Rplp0-ps1	540.49	0.676284	0.0768617	8.79872	1.3839e-18	1.96722e-15	Ribosomal
Atp5g2	235.714	0.69486	0.0793841	8.75314	2.07495e-18	2.6814e-15	Coding
Rpl30	27923	0.294404	0.033833	8.70167	3.27024e-18	3.87387e-15	Ribosomal
Tnnt2	419.114	-1.77733	0.205005	-8.66972	4.33167e-18	4.73652e-15	Coding
AC159815.1	426.055	0.650926	0.0753365	8.64024	5.60941e-18	5.69556e-15	Noncoding
Gm7434	174.485	0.813226	0.095014	8.55901	1.13842e-17	1.01142e-14	Predicted
Gm4332	4417.11	0.290479	0.0339288	8.56143	1.11478e-17	1.01142e-14	Predicted
Rps8-ps1	117.192	0.984637	0.115734	8.50778	1.77295e-17	1.4825e-14	Ribosomal
Gm10073	2102.22	0.373805	0.0449234	8.32094	8.72649e-17	6.89151e-14	Predicted
Rpa3	1938.52	-0.354817	0.0428936	-8.27203	1.31697e-16	9.85305e-14	Coding
Atp5l	1044.78	0.428116	0.0520814	8.22013	2.03281e-16	1.44482e-13	Coding
Rps12-ps3	96.8946	1.11941	0.138898	8.05926	7.67564e-16	5.19568e-13	Ribosomal
Gja1	4154.06	-0.302811	0.0382526	-7.9161	2.45082e-15	1.58356e-12	Coding
Gm9625	380.76	0.503136	0.0649146	7.75073	9.13685e-15	5.19521e-12	Predicted
Rpl35a	7398.61	0.31964	0.0412229	7.75395	8.90802e-15	5.19521e-12	Ribosomal
Cst6	1659.04	0.423043	0.0545646	7.75307	8.9696e-15	5.19521e-12	Coding
Rpl18-ps1	357.352	0.589053	0.0785137	7.50255	6.2588e-14	3.42188e-11	Ribosomal
AC158620.2	154.728	0.705743	0.0966615	7.30118	2.85254e-13	1.47053e-10	Noncoding
Gm9385	302.708	0.512189	0.0701714	7.29912	2.89657e-13	1.47053e-10	Predicted
Olfml3	100.065	1.25515	0.17265	7.26989	3.59781e-13	1.76355e-10	Coding
Gm6394	235.522	0.577056	0.080343	7.1824	6.8496e-13	3.24557e-10	Predicted
Gm29257	126.879	0.772532	0.107822	7.16489	7.78468e-13	3.56965e-10	Predicted
Gm8292	206.165	0.633939	0.0888339	7.13623	9.59253e-13	4.26118e-10	Predicted
Gm8430	1503.04	0.280266	0.0394334	7.10733	1.18312e-12	5.09638e-10	Predicted
Gm10275	870.71	0.380551	0.0536284	7.09608	1.28346e-12	5.36601e-10	Predicted
Rps29	90294.4	-0.225786	0.0322681	-6.9972	2.61137e-12	1.06059e-09	Ribosomal
AC124744.2	3049.81	0.268438	0.0384793	6.97616	3.03354e-12	1.19783e-09	Noncoding
Gm43302	474.994	1.25527	0.180072	6.97093	3.14854e-12	1.20964e-09	Predicted
Ifi207	154.957	1.56052	0.226541	6.88848	5.63924e-12	2.10952e-09	Coding
Cd63-ps	1088.96	0.35191	0.0515512	6.82642	8.70586e-12	3.17317e-09	Noncoding
Gm7204	69.1425	1.14938	0.168572	6.81833	9.21056e-12	3.2732e-09	Predicted
Rps11-ps1	1055.43	0.300315	0.044093	6.81095	9.6956e-12	3.36153e-09	Ribosomal
Ifit3	706.734	1.09487	0.161048	6.79843	1.05766e-11	3.57968e-09	Coding
Rpl38	36030.1	-0.190964	0.028416	-6.72029	1.81365e-11	5.99558e-09	Ribosomal
Gm9843	5174.48	0.270968	0.0407074	6.65648	2.8047e-11	9.06108e-09	Predicted
Gm28437	217.063	0.638517	0.0965545	6.61302	3.76554e-11	1.18949e-08	Predicted
Rpl14-ps1	519.407	0.417816	0.0632315	6.60772	3.90281e-11	1.20605e-08	Ribosomal
Trim30a	745.879	0.578289	0.0880166	6.57022	5.02408e-11	1.51952e-08	Coding
Ifi203	2946.07	0.389258	0.0594451	6.54819	5.82397e-11	1.72475e-08	Coding
Fam26f	47.2505	1.48231	0.227455	6.51693	7.17625e-11	2.08185e-08	Coding
Gm13456	224.979	0.556052	0.0860353	6.46306	1.02605e-10	2.91705e-08	Predicted
Gjb3	1371.17	-0.630646	0.0977171	-6.4538	1.09083e-10	3.04043e-08	Coding
Lamb1	1595.88	-0.296849	0.0465882	-6.37176	1.86866e-10	5.10828e-08	Coding
Rps6-ps3	104.907	0.745159	0.117255	6.35504	2.08376e-10	5.48947e-08	Ribosomal
Chst2	722.983	-0.419495	0.066011	-6.35492	2.08534e-10	5.48947e-08	Coding
Gpc1	535.465	-0.630601	0.0998617	-6.31474	2.70609e-10	6.99401e-08	Coding
Rtp4	1654.78	0.6925	0.10991	6.30063	2.9644e-10	7.5248e-08	Coding
Gbp8	503.246	1.2514	0.201053	6.22425	4.83857e-10	1.20667e-07	Coding
Slc25a48	346.725	-0.50509	0.0818544	-6.1706	6.80326e-10	1.66738e-07	Coding
Gm6576	210.862	0.565525	0.0917123	6.16629	6.99097e-10	1.68435e-07	Predicted
Ly6a	25927.9	0.991075	0.160997	6.15585	7.46743e-10	1.76916e-07	Coding
Pkp2	380.243	-0.515377	0.0839287	-6.14066	8.21814e-10	1.9151e-07	Coding
Efnb2	298.18	-0.536092	0.0877756	-6.10753	1.01182e-09	2.31985e-07	Coding
Parp3	716.827	0.454106	0.0745081	6.09473	1.09625e-09	2.47352e-07	Coding
Trim12c	658.784	0.464559	0.0763754	6.08257	1.1827e-09	2.62688e-07	Coding
Arhgap29	261.722	-0.543066	0.0895231	-6.06622	1.30958e-09	2.86395e-07	Coding
Gm4951	916.223	0.938344	0.155141	6.04834	1.46349e-09	3.15204e-07	Predicted
Rpl7	21300.5	-0.159112	0.0263187	-6.04558	1.48878e-09	3.15865e-07	Ribosomal
Il18bp	624.939	0.941373	0.155905	6.03811	1.55925e-09	3.25952e-07	Coding
Stat2	644.011	0.615666	0.102306	6.01788	1.76716e-09	3.64061e-07	Coding
Rps15-ps2	229.103	0.5091	0.0846965	6.01087	1.8453e-09	3.74729e-07	Ribosomal
Irgm2	647.266	0.894176	0.149239	5.99157	2.0782e-09	4.16079e-07	Coding
Rpl21-ps12	159.487	0.609474	0.101801	5.9869	2.13879e-09	4.22262e-07	Ribosomal
Dhcr24	982.916	-0.420417	0.0703511	-5.97599	2.28702e-09	4.45343e-07	Coding
Gm5805	394.29	0.46189	0.0778453	5.93343	2.96662e-09	5.69872e-07	Predicted
Rps15a-ps5	151.122	0.586714	0.0990569	5.92299	3.16135e-09	5.9918e-07	Ribosomal
Gm5561	58.675	1.03761	0.175558	5.91036	3.41356e-09	6.38471e-07	Predicted
Myh9	2990.58	-0.27947	0.0473471	-5.90257	3.57872e-09	6.60668e-07	Coding
C1s1	1212	0.837619	0.141988	5.89923	3.65191e-09	6.65537e-07	Coding
Rpl39-ps	1250.53	0.328342	0.0561088	5.85188	4.86055e-09	8.74592e-07	Ribosomal
Rpl13-ps3	164.836	0.553352	0.0947197	5.84199	5.15811e-09	9.07018e-07	Ribosomal
Itga2	106.335	-1.20218	0.205795	-5.84166	5.16838e-09	9.07018e-07	Coding
Gm2000	429.065	0.392488	0.0672366	5.83742	5.30148e-09	9.1903e-07	Predicted
Gm6368	161.186	0.608144	0.105118	5.78534	7.23668e-09	1.23939e-06	Predicted
AC122367.3	114.462	0.68017	0.11765	5.78132	7.41175e-09	1.25426e-06	Noncoding
Gm5970	40.8629	1.54737	0.269709	5.73718	9.62669e-09	1.60992e-06	Predicted
Rpl34-ps1	2068.81	0.230469	0.0402309	5.72866	1.01227e-08	1.65652e-06	Ribosomal
Dhx58	426.562	0.522689	0.0912452	5.7284	1.01384e-08	1.65652e-06	Coding
Serpinb1b	36.9079	1.25209	0.219288	5.70979	1.13114e-08	1.82717e-06	Coding
Flnb	1220.74	-0.306416	0.0539795	-5.67653	1.37454e-08	2.14715e-06	Coding
Gm3788	217.382	0.455951	0.0802904	5.67878	1.35658e-08	2.14715e-06	Predicted
Iigp1	10087.9	1.04579	0.184197	5.67758	1.36617e-08	2.14715e-06	Coding
Map1b	2572.14	-0.258685	0.0456926	-5.66143	1.50113e-08	2.31941e-06	Coding
Gbp2b	7871.57	0.947276	0.16751	5.65503	1.55818e-08	2.35633e-06	Coding
Clec2d	758.593	0.411985	0.0728353	5.6564	1.54583e-08	2.35633e-06	Coding
Irf1	3167.28	0.822602	0.145704	5.6457	1.64507e-08	2.46155e-06	Coding
Mt4	43.9964	1.81375	0.321786	5.6365	1.73544e-08	2.56971e-06	Coding
Adam12	154.159	-1.05504	0.187421	-5.62923	1.81012e-08	2.65266e-06	Coding
Ackr3	487.195	-0.38827	0.0691386	-5.61582	1.95627e-08	2.83758e-06	Coding
Ifi47	3006.05	0.769999	0.137499	5.60005	2.14284e-08	3.07681e-06	Coding
Flna	4650.47	-0.254366	0.0455576	-5.58338	2.35883e-08	3.33335e-06	Coding
Socs1	806.825	0.955616	0.171175	5.58268	2.3684e-08	3.33335e-06	Coding
mt-Co3	313.05	0.419265	0.0755257	5.55129	2.83567e-08	3.9135e-06	Mitochondrial
Lad1	86.5689	-0.923675	0.166355	-5.55242	2.81739e-08	3.9135e-06	Coding
AC158239.2	205.644	0.610075	0.110059	5.54319	2.97009e-08	4.0596e-06	Noncoding
Unc5b	206.62	-0.593103	0.107172	-5.53413	3.12772e-08	4.23434e-06	Coding
Klf2	653.534	0.760774	0.138089	5.50932	3.60229e-08	4.8308e-06	Coding
Rpl36-ps2	215.971	0.501597	0.0914643	5.48407	4.15649e-08	5.52192e-06	Ribosomal
Gm10029	189.446	0.526093	0.0960647	5.47645	4.33944e-08	5.71159e-06	Predicted
Clcn3	686.304	-0.381367	0.069672	-5.47375	4.40615e-08	5.74618e-06	Coding
Trim30d	120.905	1.08466	0.198258	5.47097	4.47583e-08	5.784e-06	Coding
Stat1	1746.49	0.733916	0.134804	5.4443	5.20089e-08	6.66041e-06	Coding
Gm11810	69.2591	0.750849	0.13807	5.43818	5.38266e-08	6.83165e-06	Predicted
Ifi44	994.601	0.657018	0.121203	5.42081	5.9331e-08	7.46363e-06	Coding
AC151846.1	164.398	0.532598	0.0986025	5.40146	6.60991e-08	8.24209e-06	Noncoding
Gm16379	94.2874	0.70915	0.131337	5.39948	6.6833e-08	8.26114e-06	Predicted
Gm43712	843.366	0.280594	0.0520214	5.39381	6.89777e-08	8.3805e-06	Predicted
Hist1h2ap	1295.97	0.66901	0.124014	5.39464	6.86615e-08	8.3805e-06	Coding
Ifitm3	38587.5	0.448657	0.083275	5.38765	7.13833e-08	8.59927e-06	Coding
Apol6	356.228	1.61824	0.300457	5.38592	7.20769e-08	8.60986e-06	Coding
Id1	557.467	0.73341	0.136504	5.37282	7.75167e-08	9.10661e-06	Coding
Rcor1	901.816	-0.265291	0.0493641	-5.37417	7.69365e-08	9.10661e-06	Coding
Mex3d	914.028	-0.311914	0.0582323	-5.35638	8.49074e-08	9.89311e-06	Coding
Psme2b	265.741	0.567831	0.106328	5.34035	9.27663e-08	1.07209e-05	Coding
Irf7	1648.37	0.717552	0.134942	5.31746	1.05224e-07	1.20626e-05	Coding
Cd274	325.322	1.50076	0.282664	5.30933	1.10027e-07	1.25122e-05	Coding
Il15	427.772	0.436247	0.0822381	5.30468	1.12871e-07	1.27338e-05	Coding
Gm12466	142.964	0.541753	0.102185	5.30169	1.14738e-07	1.28425e-05	Predicted
Col7a1	350.476	-0.951084	0.179786	-5.29008	1.22261e-07	1.35777e-05	Coding
Mndal	2193.51	0.276833	0.0526524	5.25775	1.45828e-07	1.60693e-05	Coding
Pla1a	1190.56	0.324719	0.0618489	5.25019	1.51943e-07	1.66144e-05	Coding
Dock8	93.9269	-0.685854	0.130696	-5.24772	1.53991e-07	1.67098e-05	Coding
Spcs3	992.067	-0.238833	0.0455536	-5.24289	1.58078e-07	1.70234e-05	Coding
Samhd1	1957.35	0.739864	0.141374	5.23338	1.6644e-07	1.77891e-05	Coding
Rps6	12477.9	-0.21462	0.0410397	-5.22958	1.69897e-07	1.80231e-05	Ribosomal
Esyt1	341.384	-0.403598	0.0773476	-5.21798	1.80887e-07	1.90468e-05	Coding
Gm11478	949.226	0.278609	0.0534106	5.21636	1.82475e-07	1.90726e-05	Predicted
Gm6204	232.411	0.410735	0.0792963	5.17975	2.22189e-07	2.30541e-05	Predicted
Gm4841	134.781	0.867988	0.167618	5.17837	2.23829e-07	2.3056e-05	Predicted
Xaf1	1277.17	0.571181	0.110653	5.16189	2.44465e-07	2.50005e-05	Coding
Igfbp6	6895.55	0.373202	0.072484	5.14876	2.6222e-07	2.65681e-05	Coding
Zbp1	2528.28	0.79464	0.154364	5.14782	2.63532e-07	2.65681e-05	Coding
Nck2	136.829	-0.510686	0.0994682	-5.13416	2.83401e-07	2.83701e-05	Coding
Acat2	836.3	-0.671912	0.131375	-5.11447	3.14616e-07	3.12746e-05	Coding
Tgtp1	50.7716	1.10116	0.215446	5.11106	3.20356e-07	3.16241e-05	Coding
Ppp1r13l	128.826	-0.665077	0.130516	-5.09575	3.47367e-07	3.38207e-05	Coding
Wwc2	979.118	-0.271967	0.0533616	-5.09669	3.45644e-07	3.38207e-05	Coding
Gbp2	9620.24	0.792414	0.156115	5.07583	3.85803e-07	3.70914e-05	Coding
Ak4	297.279	-0.44633	0.0879356	-5.07565	3.86179e-07	3.70914e-05	Coding
Apol9a	1135.05	0.750813	0.147981	5.07371	3.90138e-07	3.72203e-05	Coding
Adamts1	1670.6	0.413128	0.0815003	5.06904	3.9983e-07	3.76396e-05	Coding
Gm28661	151.71	0.52279	0.10312	5.06971	3.98431e-07	3.76396e-05	Predicted
Gm7266	130.157	0.545931	0.107745	5.06687	4.04413e-07	3.78206e-05	Predicted
Rpl10	54489.9	-0.141062	0.0278612	-5.06303	4.12654e-07	3.80901e-05	Ribosomal
Kirrel	347.043	-0.543039	0.107235	-5.06403	4.10481e-07	3.80901e-05	Coding
Cox6c	16932.3	0.129924	0.025675	5.06034	4.1852e-07	3.83823e-05	Coding
Gm29216	134.892	0.528532	0.104526	5.05645	4.27129e-07	3.83941e-05	Predicted
Phf11d	532.292	0.914617	0.180918	5.05542	4.29452e-07	3.83941e-05	Coding
Bglap2	78.1197	1.10191	0.217962	5.0555	4.29258e-07	3.83941e-05	Coding
Ptgfrn	630.551	-0.383756	0.075868	-5.0582	4.23231e-07	3.83941e-05	Coding
Myef2	684.341	-0.297287	0.0588519	-5.05145	4.38475e-07	3.89558e-05	Coding
Rpl21	34358.3	-0.121492	0.0240912	-5.043	4.58298e-07	4.04641e-05	Ribosomal
Lamb3	13.7332	-2.13971	0.424431	-5.04137	4.62202e-07	4.05568e-05	Coding
Gm6222	191.471	0.524599	0.104309	5.02928	4.92315e-07	4.28374e-05	Predicted
Hspd1-ps3	99.8126	0.706881	0.140574	5.02854	4.9422e-07	4.28374e-05	Noncoding
Zfp395	489.199	-0.504554	0.100384	-5.02624	5.00202e-07	4.30932e-05	Coding
Fam57a	91.5379	-0.745722	0.148427	-5.02417	5.05623e-07	4.32977e-05	Coding
Gpr39	341.581	-0.439447	0.0876594	-5.01311	5.35561e-07	4.55868e-05	Coding
Wars	725.879	0.582547	0.116316	5.0083	5.49137e-07	4.64642e-05	Coding
Gm11273	188.261	0.457728	0.0917368	4.98958	6.05118e-07	5.08863e-05	Predicted
Pdlim7	2872.78	-0.236541	0.0474174	-4.98848	6.08559e-07	5.08863e-05	Coding
Iqgap1	2210.86	-0.206142	0.0414017	-4.97906	6.38927e-07	5.28109e-05	Coding
Gm5905	1288.23	0.276145	0.0554616	4.97904	6.39006e-07	5.28109e-05	Predicted
Csnk1d	1344.82	-0.212053	0.0429176	-4.94094	7.77455e-07	6.38816e-05	Coding
Id3	5782.97	0.462258	0.0940168	4.91676	8.79882e-07	7.18823e-05	Coding
Osbpl3	382.46	-0.370051	0.0753751	-4.90945	9.13305e-07	7.41864e-05	Coding
2300009A05Rik	416.557	0.370863	0.0755599	4.9082	9.19177e-07	7.42392e-05	Coding
AL607105.1	699.458	0.271014	0.0553037	4.90047	9.56085e-07	7.67839e-05	Coding
Batf2	658.744	1.52105	0.310819	4.89371	9.89548e-07	7.90249e-05	Coding
Xdh	852.71	0.417881	0.0855017	4.8874	1.02174e-06	8.114e-05	Coding
Ssr3	4018.42	-0.134393	0.0275722	-4.87421	1.09242e-06	8.62712e-05	Coding
Slfn8	327.298	0.526049	0.108017	4.87007	1.11561e-06	8.76156e-05	Coding
Plekha2	1207.54	-0.238591	0.0490407	-4.86518	1.14355e-06	8.93166e-05	Coding
Gm7429	170.01	0.46365	0.0955315	4.85337	1.21378e-06	9.42836e-05	Predicted
Ppme1	1102.7	-0.23958	0.049522	-4.83785	1.31251e-06	0.000101399	Coding
Fgl2	47.1526	1.06128	0.21949	4.83524	1.32987e-06	0.000101756	Coding
Gm5687	83.1261	0.633986	0.131124	4.835	1.33145e-06	0.000101756	Predicted
Gm6341	81.6177	0.648381	0.134151	4.83321	1.34346e-06	0.000102125	Predicted
Homer1	336.849	-0.378297	0.0783187	-4.83023	1.36376e-06	0.000103117	Coding
Gm10689	215.6	0.424262	0.0879982	4.82126	1.42653e-06	0.000107291	Predicted
Map7d1	1265.11	-0.235661	0.0488946	-4.81977	1.43725e-06	0.000107529	Coding
Bglap	49.033	0.90231	0.187495	4.81244	1.49097e-06	0.000110964	Coding
Cbx3	3988.73	-0.145377	0.0302949	-4.79874	1.59663e-06	0.000118209	Coding
Tnfsf10	123.685	0.777935	0.162437	4.78916	1.67483e-06	0.000122954	Coding
Vcam1	1023.67	0.454516	0.0949128	4.78878	1.67802e-06	0.000122954	Coding
Gm5963	112.938	0.513365	0.107327	4.78318	1.72544e-06	0.00012578	Predicted
Gm13461	16.2837	1.49897	0.313935	4.77479	1.79896e-06	0.000130471	Predicted
1110038F14Rik	1401.43	0.227782	0.0478368	4.76165	1.92015e-06	0.000138553	Coding
Crem	261.361	0.503527	0.105827	4.75804	1.95482e-06	0.000140342	Coding
Gm12250	1138.95	1.35433	0.285737	4.73978	2.13955e-06	0.000152833	Predicted
Ifit1	1303.56	0.650251	0.137241	4.73802	2.15814e-06	0.000153204	Coding
Gm7027	25.8392	1.05629	0.222974	4.73726	2.1663e-06	0.000153204	Predicted
4632427E13Rik	489.759	0.295154	0.0623422	4.73441	2.19696e-06	0.000154603	Noncoding
Rpsa-ps12	217.745	0.424474	0.0897206	4.73106	2.23352e-06	0.000156401	Noncoding
Nt5e	156.281	-0.569873	0.120518	-4.72852	2.26163e-06	0.000157593	Coding
Hmgcr	1841.06	-0.599175	0.12701	-4.71755	2.38703e-06	0.000163921	Coding
Gbp11	69.9155	1.1438	0.24244	4.71786	2.38335e-06	0.000163921	Coding
Irf9	637.507	0.365854	0.0775386	4.71834	2.37777e-06	0.000163921	Coding
Spsb1	361.23	-0.49853	0.105736	-4.71488	2.41851e-06	0.000165284	Coding
2310039H08Rik	1025.5	0.24862	0.0528719	4.70232	2.57224e-06	0.000174949	Coding
Myadm	1213.17	-0.280361	0.059639	-4.70097	2.58927e-06	0.000175269	Coding
Gm9619	64.3105	0.709678	0.151016	4.69934	2.60999e-06	0.000175834	Predicted
Acsbg1	473.045	-0.454552	0.096804	-4.69559	2.65841e-06	0.000178252	Coding
Gm1821	105.784	0.678341	0.144648	4.68961	2.73725e-06	0.000181602	Predicted
Ifi35	1182.44	0.512932	0.109393	4.6889	2.74671e-06	0.000181602	Coding
Pik3cb	189.874	-0.41969	0.089503	-4.68912	2.74382e-06	0.000181602	Coding
Notch2	661.389	-0.43399	0.0928154	-4.67584	2.92752e-06	0.000192661	Coding
Gbp9	728.998	0.542001	0.116005	4.67224	2.97932e-06	0.000195166	Coding
Ldb1	371.79	-0.348215	0.0746088	-4.66721	3.05311e-06	0.000199082	Coding
Ppp2cb	787.609	-0.274603	0.058947	-4.65846	3.18578e-06	0.000206785	Coding
Dio2	102.548	0.82096	0.176339	4.65558	3.23078e-06	0.000208752	Coding
Trafd1	799.22	0.348166	0.0748106	4.65396	3.25624e-06	0.000209445	Coding
Oasl2	767.491	0.61008	0.131274	4.64739	3.36153e-06	0.000215244	Coding
Itgav	485.786	-0.316151	0.0680532	-4.64565	3.39004e-06	0.000215495	Coding
Mx2	137.109	0.861249	0.185402	4.6453	3.39576e-06	0.000215495	Coding
Gstp-ps	362.428	0.312828	0.0674904	4.63516	3.56669e-06	0.000225072	Noncoding
Gm13835	361.912	0.43751	0.0944033	4.63448	3.57835e-06	0.000225072	Predicted
Apol9b	781.502	0.776019	0.167837	4.62364	3.77056e-06	0.000236117	Coding
Skil	997.483	-0.431746	0.0934964	-4.61778	3.8787e-06	0.000241823	Coding
Gm12918	63.8332	0.702447	0.152181	4.61586	3.91479e-06	0.000243008	Predicted
Olfr753-ps1	13.9689	1.98399	0.430024	4.61368	3.95605e-06	0.000244501	Coding
Cnnm4	70.8577	-0.715477	0.155169	-4.61096	4.00812e-06	0.000246334	Coding
Rps15a-ps7	425.326	0.30665	0.0665137	4.61033	4.02037e-06	0.000246334	Ribosomal
Rhobtb3	1179.62	-0.239245	0.0519912	-4.60164	4.19184e-06	0.000255738	Coding
Erfe	37.4226	-0.9089	0.19757	-4.6004	4.21687e-06	0.000256166	Coding
Cotl1	579.261	-0.636716	0.138445	-4.59905	4.24412e-06	0.000256724	Coding
Ces1g	13.8211	-1.86037	0.405344	-4.58961	4.44077e-06	0.000264354	Coding
Lrrfip1	1369.82	-0.242988	0.0529452	-4.58943	4.44464e-06	0.000264354	Coding
Fdps	4688.58	-0.650372	0.141704	-4.58966	4.43979e-06	0.000264354	Coding
Igtp	3444.31	1.24955	0.272226	4.59012	4.4299e-06	0.000264354	Coding
C1s2	441.292	0.648222	0.141368	4.58535	4.53227e-06	0.000268443	Coding
Nup98	328.074	-0.364822	0.0796207	-4.58199	4.60564e-06	0.000271656	Coding
Rps15a-ps4	76.6774	0.646058	0.141126	4.57789	4.69688e-06	0.000273945	Ribosomal
Vegfa	2083.81	-0.525101	0.11467	-4.57925	4.66646e-06	0.000273945	Coding
Gm7730	66.2324	0.721372	0.157586	4.57765	4.70225e-06	0.000273945	Predicted
Tpm4	8368.21	-0.187397	0.0409585	-4.57528	4.75575e-06	0.000275931	Coding
Lss	264.572	-0.571087	0.124976	-4.56956	4.8874e-06	0.000282416	Coding
Lap3	4016.45	0.578749	0.127167	4.5511	5.33655e-06	0.000307121	Coding
Ubd	124.743	1.13591	0.249783	4.54758	5.42655e-06	0.000309721	Coding
P4hb	4648	-0.209889	0.0461569	-4.54729	5.43412e-06	0.000309721	Coding
Msn	5404.84	-0.249214	0.054811	-4.54679	5.44709e-06	0.000309721	Coding
Gm10250	281.34	0.365799	0.0805029	4.54393	5.52161e-06	0.000312708	Predicted
Trip10	1081.63	-0.242955	0.0535142	-4.54001	5.6251e-06	0.000317305	Coding
Dusp1	5888.04	0.49243	0.108506	4.53828	5.67143e-06	0.000318653	Coding
Dock7	929.03	-0.249966	0.0551334	-4.53383	5.79225e-06	0.000324161	Coding
Ctsw	47.3665	-1.42793	0.316167	-4.51637	6.29085e-06	0.000350684	Coding
Gstp1	932.726	0.285037	0.0631758	4.51181	6.42778e-06	0.000356917	Coding
Fam117b	309.827	-0.396707	0.0879965	-4.50821	6.53756e-06	0.000361601	Coding
Bcar1	703.291	-0.268895	0.0597101	-4.50335	6.68919e-06	0.000368554	Coding
Gm12185	37.2687	1.28997	0.286787	4.49801	6.85929e-06	0.000376466	Predicted
Hs6st1	208.096	-0.420789	0.0935954	-4.49583	6.92989e-06	0.000378879	Coding
Shisa5	1584.05	0.235331	0.0523681	4.49379	6.99667e-06	0.000381064	Coding
Acly	1002.24	-0.407209	0.09067	-4.4911	7.0855e-06	0.000384429	Coding
Gm13436	493.339	0.294419	0.0655762	4.48973	7.13136e-06	0.000385446	Predicted
Ifi211	353.501	0.36322	0.0810665	4.48051	7.44633e-06	0.000399555	Coding
Tmbim4	3563.76	0.254737	0.0568551	4.48045	7.44861e-06	0.000399555	Coding
mt-Co1	15225.3	0.150358	0.0335843	4.47704	7.5685e-06	0.000404459	Mitochondrial
Tapbp	5839.16	0.230124	0.0514375	4.47385	7.6822e-06	0.000408998	Coding
Tap1	3036.04	0.446715	0.0998911	4.47202	7.74846e-06	0.000410987	Coding
Elovl6	1021.86	-0.403571	0.0904042	-4.46407	8.04157e-06	0.000424948	Coding
Ndufa12	678.982	0.349246	0.0783254	4.45891	8.23756e-06	0.000432092	Coding
Wdr89	3193.47	0.188139	0.0421922	4.45909	8.23079e-06	0.000432092	Coding
Rps3a2	3145.7	-0.189551	0.0425488	-4.45492	8.39264e-06	0.000437001	Ribosomal
Gsdmd	928.387	0.251417	0.0564319	4.45522	8.38056e-06	0.000437001	Coding
Herc6	487.9	0.529486	0.119051	4.44755	8.68563e-06	0.000448968	Coding
Wnt11	25.9133	-1.20074	0.269945	-4.44808	8.664e-06	0.000448968	Coding
Idi1	2154.19	-0.652549	0.146778	-4.44582	8.7557e-06	0.00045095	Coding
Tead2	475.024	-0.265766	0.059804	-4.44395	8.83206e-06	0.000453241	Coding
Gla	553.125	0.367815	0.0829215	4.4357	9.17748e-06	0.000469273	Coding
Ctnna1	2625.13	-0.181081	0.0408373	-4.43421	9.24111e-06	0.000470833	Coding
Tbc1d1	482.394	-0.289707	0.0653872	-4.43063	9.39574e-06	0.000477002	Coding
Idnk	3284.26	0.31687	0.0716761	4.42086	9.83072e-06	0.000497309	Coding
Oas3	253.905	0.883237	0.199833	4.41987	9.87585e-06	0.00049782	Coding
Csrnp1	591.358	0.550906	0.124866	4.41197	1.02436e-05	0.000514534	Coding
Wnk1	2646.83	-0.163151	0.0370906	-4.39871	1.08896e-05	0.000543375	Coding
Rpl10-ps3	341.761	-0.297742	0.06769	-4.39862	1.08943e-05	0.000543375	Ribosomal
CT030657.5	122.448	0.532246	0.121261	4.38925	1.1374e-05	0.000565318	Noncoding
Il7	277.376	0.360981	0.0822931	4.38653	1.15174e-05	0.000570451	Coding
Gorab	458.948	0.287177	0.0655438	4.38145	1.17892e-05	0.000581889	Coding
Lgals3bp	1509.77	0.328688	0.0750744	4.37816	1.19685e-05	0.000588691	Coding
Cxcl2	3339.61	0.643035	0.146951	4.37586	1.20957e-05	0.000592899	Coding
Gbp5	585.789	1.24297	0.284346	4.37132	1.23496e-05	0.000603263	Coding
Rps28	31940.4	-0.194813	0.0446934	-4.35887	1.30736e-05	0.000634189	Ribosomal
Unc93b1	308.435	0.375097	0.086068	4.35815	1.31165e-05	0.000634189	Coding
Tubb2a	3084.32	0.337664	0.0774643	4.35896	1.30681e-05	0.000634189	Coding
Taf7	338.529	0.345961	0.0794769	4.35298	1.34301e-05	0.00064715	Coding
Gbp3	3139.23	1.03219	0.237491	4.34624	1.3849e-05	0.000665082	Coding
Wnt7b	54.6117	-0.94175	0.216822	-4.34342	1.40281e-05	0.000671413	Coding
Gbp4	5727.78	1.32494	0.30531	4.33966	1.42701e-05	0.000680702	Coding
Snx10	881.411	0.350866	0.0812853	4.31648	1.58537e-05	0.000753713	Coding
Gm8762	34.0375	0.948642	0.219893	4.31412	1.60243e-05	0.000759285	Predicted
Irak2	243.304	0.360012	0.0835306	4.30994	1.63295e-05	0.000771178	Coding
Nme2	207.213	0.415109	0.0963647	4.30769	1.6497e-05	0.000776508	Coding
Irgm1	1713.47	0.799697	0.185748	4.30528	1.66775e-05	0.000781459	Coding
Ly6c1	1001.76	1.54006	0.357754	4.30482	1.67122e-05	0.000781459	Coding
S100a11	15831.4	-0.166614	0.0387371	-4.30115	1.69914e-05	0.000791912	Coding
1810022K09Rik	1038.37	0.192435	0.0447497	4.30024	1.7061e-05	0.000792555	Coding
Ucn2	18.6601	-1.36208	0.316854	-4.29877	1.71752e-05	0.000795262	Coding
Agl	518.294	-0.266886	0.0621238	-4.29603	1.7388e-05	0.000802502	Coding
Gm14165	201.243	0.403468	0.0940384	4.29045	1.78308e-05	0.000820272	Predicted
Gm3375	140.458	0.463378	0.108113	4.28604	1.8189e-05	0.000828707	Predicted
Hmgcs1	3218.4	-0.618976	0.144412	-4.28618	1.81774e-05	0.000828707	Coding
Rpl28-ps1	771.735	0.241295	0.0562839	4.2871	1.81018e-05	0.000828707	Ribosomal
Uap1l1	852.121	0.255284	0.0595946	4.28368	1.83828e-05	0.00083486	Coding
Crip2	585.334	0.42411	0.0990701	4.28091	1.86133e-05	0.000842636	Coding
Gm13341	80.4501	0.628014	0.146873	4.27591	1.90359e-05	0.000859033	Predicted
Epsti1	989.26	0.541049	0.12656	4.27504	1.91104e-05	0.000859667	Coding
Mrpl52	5055.62	0.15387	0.0360786	4.26486	2.00031e-05	0.000896983	Coding
Myl9	392.822	-0.667045	0.156453	-4.26354	2.01214e-05	0.000899451	Coding
Papss1	1507.19	-0.249013	0.058419	-4.26253	2.02123e-05	0.000900685	Coding
Eno1	12032.2	-0.210804	0.0495433	-4.25495	2.09092e-05	0.000925932	Coding
Rps13-ps2	778.812	0.22805	0.0535915	4.25533	2.08739e-05	0.000925932	Ribosomal
Mgarp	681.623	-0.515022	0.121201	-4.24932	2.14422e-05	0.000944412	Coding
Ifit3b	150.717	0.866313	0.20388	4.24914	2.14594e-05	0.000944412	Coding
Cebpb	9388.48	0.253635	0.059718	4.24721	2.16453e-05	0.000949653	Coding
Gm5879	41.7876	0.741874	0.174774	4.24475	2.18835e-05	0.000957152	Predicted
Gys1	573.224	-0.297999	0.0703316	-4.23705	2.26474e-05	0.000987523	Coding
Arid2	522.475	-0.279654	0.06608	-4.23205	2.31568e-05	0.00100358	Coding
Ajuba	279.913	-0.31363	0.0740984	-4.23262	2.30988e-05	0.00100358	Coding
Pank3	530.946	-0.398282	0.0941488	-4.23035	2.33328e-05	0.00100813	Coding
Gm11687	127.365	0.503366	0.119092	4.22669	2.37158e-05	0.00102158	Predicted
Gm14681	157.959	0.448643	0.106664	4.20615	2.59762e-05	0.00111557	Predicted
2020-09-04	257.531	0.980472	0.233241	4.20369	2.62595e-05	0.00112434	Coding
Mthfd1l	678.812	-0.275474	0.0656091	-4.19872	2.68433e-05	0.00114588	Coding
Gm6905	36.7046	0.786028	0.187767	4.1862	2.83669e-05	0.00120488	Predicted
Gm7832	14.9124	1.37767	0.329117	4.18597	2.8395e-05	0.00120488	Predicted
Enpp2	2129.68	0.670829	0.160477	4.18022	2.91233e-05	0.0012321	Coding
Fstl3	628.98	-0.342676	0.0821026	-4.17376	2.99619e-05	0.00126382	Coding
Rad1	417.884	0.304271	0.0729166	4.17286	3.00802e-05	0.00126506	Coding
Fermt2	2018.22	-0.259481	0.0623189	-4.16376	3.13043e-05	0.00131266	Coding
Gm43362	381.008	0.310994	0.0747453	4.16071	3.17259e-05	0.00132642	Predicted
Rph3a	9.81595	-1.69068	0.406421	-4.15991	3.1837e-05	0.00132716	Coding
Fam168a	603.604	-0.286097	0.0688259	-4.15682	3.22706e-05	0.0013413	Coding
Map3k20	620.817	-0.297886	0.0716807	-4.15573	3.24252e-05	0.0013438	Coding
Chsy1	327.933	-0.371603	0.0894815	-4.15285	3.28364e-05	0.00135192	Coding
Mvd	665.916	-0.775033	0.186649	-4.15236	3.29063e-05	0.00135192	Coding
Taok1	1006.13	-0.222541	0.0535847	-4.15308	3.28035e-05	0.00135192	Coding
Prr13	4086.5	0.218409	0.0526193	4.15073	3.3141e-05	0.00135764	Coding
Ammecr1	702.569	-0.282782	0.0681677	-4.14833	3.34915e-05	0.00136805	Coding
Usp18	637.31	0.545069	0.131496	4.14514	3.39608e-05	0.00138324	Coding
Gm6136	85.0316	0.519751	0.125503	4.14134	3.45286e-05	0.00140235	Predicted
Rps15a-ps8	88.5328	0.546506	0.13212	4.13644	3.52743e-05	0.00142856	Ribosomal
Atp8b2	143.643	-0.420644	0.101719	-4.13536	3.54392e-05	0.00143116	Coding
Ier5	3827.26	0.398137	0.0963591	4.13181	3.59918e-05	0.00144936	Coding
Apaf1	212.782	-0.360749	0.0874835	-4.12363	3.72953e-05	0.00149659	Coding
Kif21a	557.778	0.266893	0.0647307	4.12313	3.73753e-05	0.00149659	Coding
Gm12216	192.287	0.402162	0.0976717	4.11749	3.83022e-05	0.0015294	Predicted
Myo10	946.951	-0.23566	0.0572501	-4.11633	3.84956e-05	0.00153281	Coding
Txn-ps1	83.0344	0.518934	0.126248	4.11042	3.94938e-05	0.0015638	Noncoding
Mitf	153.027	0.449935	0.109448	4.11095	3.94033e-05	0.0015638	Coding
Grcc10	159.752	0.500303	0.121954	4.1024	4.08879e-05	0.0016145	Coding
Ifi204	2090.76	0.387667	0.0945986	4.09803	4.16686e-05	0.00164077	Coding
Cysrt1	39.7574	0.848499	0.207107	4.09691	4.18711e-05	0.00164419	Coding
Rpl27a	12362.1	0.104902	0.0256161	4.09517	4.21867e-05	0.00165202	Ribosomal
Pdlim5	4496.54	-0.16501	0.0403011	-4.09442	4.2322e-05	0.00165277	Coding
Sema3f	265.923	-0.306228	0.0748923	-4.08891	4.33397e-05	0.00168788	Coding
Imp3	2240.96	0.199078	0.0487199	4.08618	4.38532e-05	0.00170321	Coding
Serhl	878.728	0.349498	0.0855935	4.08323	4.44135e-05	0.00172027	Coding
Swap70	487.137	-0.280092	0.0686402	-4.08059	4.49221e-05	0.00172121	Coding
Rpsa-ps10	1051.99	0.205924	0.0504574	4.08114	4.48147e-05	0.00172121	Noncoding
Gm15191	36.2595	0.751042	0.184006	4.08161	4.47249e-05	0.00172121	Predicted
Srebf2	1063	-0.369599	0.0905392	-4.0822	4.46107e-05	0.00172121	Coding
H2-M3	1747.6	0.197007	0.0483006	4.07877	4.5274e-05	0.00173003	Coding
Tjp2	80.4601	-0.588177	0.144398	-4.07331	4.6349e-05	0.00176636	Coding
Padi3	548.946	-0.296044	0.0726969	-4.0723	4.6551e-05	0.00176931	Coding
Smtn	605.709	-0.299693	0.0736122	-4.07123	4.6765e-05	0.00177271	Coding
Gbp7	6326.2	0.93529	0.229841	4.06929	4.71575e-05	0.00178283	Coding
Arhgef2	654.079	-0.233008	0.057279	-4.06794	4.74309e-05	0.00178841	Coding
Cbr3	154.937	0.64258	0.158037	4.06601	4.78256e-05	0.00179852	Coding
Tns3	1013.95	-0.221288	0.0544531	-4.06383	4.82735e-05	0.00181058	Coding
Zfp384	155.505	-0.403662	0.0993678	-4.0623	4.8591e-05	0.00181769	Coding
Tgtp2	70.0312	0.71846	0.176967	4.05986	4.91028e-05	0.00182244	Coding
Gm11263	57.9255	0.59423	0.146323	4.06107	4.88473e-05	0.00182244	Predicted
Gm5436	71.9675	0.571759	0.140818	4.06027	4.90154e-05	0.00182244	Predicted
Isg15	6131.27	0.575077	0.141798	4.0556	5.0006e-05	0.00185113	Coding
Rfxap	536.376	-0.248375	0.0612651	-4.05409	5.03293e-05	0.00185826	Coding
Sp140	1617.45	0.227613	0.0562062	4.0496	5.13052e-05	0.00188939	Coding
Plp2	1108.76	-0.218523	0.0539823	-4.04804	5.16478e-05	0.00189709	Coding
Anp32a	2825.4	-0.183371	0.0453369	-4.04462	5.24075e-05	0.00192003	Coding
Ddx24	4122.51	0.269894	0.0667561	4.04299	5.27737e-05	0.00192848	Coding
Rpl30-ps11	30.5877	0.859907	0.212744	4.04197	5.3004e-05	0.00193193	Ribosomal
Thbd	218.433	0.471452	0.116674	4.04076	5.32793e-05	0.001937	Coding
Gm7290	130.339	0.450882	0.111716	4.03596	5.43793e-05	0.00197194	Predicted
Srsf9	2422.75	-0.159307	0.0394918	-4.03392	5.48545e-05	0.00197908	Coding
Rnf223	51.1891	0.68035	0.168636	4.03444	5.47328e-05	0.00197908	Coding
Gm10260	19386.9	-0.160855	0.0398915	-4.03232	5.52287e-05	0.00198754	Predicted
Ifi205	28.1337	1.0764	0.267058	4.03059	5.56359e-05	0.00199713	Coding
Rap2a	670.702	-0.244587	0.060796	-4.02308	5.74419e-05	0.00205677	Coding
Rpl6	44406.3	-0.116691	0.0290191	-4.02118	5.79084e-05	0.00206826	Ribosomal
Gm10053	40.4288	0.988747	0.246019	4.01899	5.84479e-05	0.0020823	Predicted
Mprip	1713.28	-0.16268	0.0405147	-4.01533	5.93633e-05	0.00210962	Coding
Gm2546	41.1075	0.715166	0.178188	4.01355	5.98118e-05	0.00212026	Predicted
Oser1	1204.09	0.268453	0.0669065	4.01236	6.01149e-05	0.0021257	Coding
Cald1	28038.2	-0.111289	0.0277486	-4.01061	6.0561e-05	0.00213616	Coding
Itgb1	7744.56	-0.315416	0.0789153	-3.9969	6.41777e-05	0.00225813	Coding
Tjp1	632.712	-0.251284	0.0629818	-3.98979	6.6132e-05	0.00229284	Coding
Ldlr	672.906	-0.398349	0.0998184	-3.99074	6.58677e-05	0.00229284	Coding
Gm13623	95.1318	0.494476	0.123865	3.99205	6.55033e-05	0.00229284	Predicted
Afap1	1122.92	-0.223204	0.0559117	-3.99208	6.5497e-05	0.00229284	Coding
Ifih1	350.65	0.314867	0.0788877	3.99133	6.57028e-05	0.00229284	Coding
Strip1	458.447	-0.302921	0.0759151	-3.99026	6.60019e-05	0.00229284	Coding
Pgm2	1529.49	-0.292278	0.0733099	-3.98689	6.69463e-05	0.00231543	Coding
Rab20	257.45	0.422887	0.106108	3.98543	6.73577e-05	0.00231838	Coding
Cox14	2682.9	0.150601	0.0377854	3.9857	6.72823e-05	0.00231838	Coding
Sms	2538.41	0.251773	0.0631865	3.9846	6.75931e-05	0.00232086	Coding
Arhgef11	98.8509	-0.616744	0.154913	-3.98122	6.85623e-05	0.00234846	Coding
Jmjd6	1322.46	-0.237138	0.0595944	-3.9792	6.91477e-05	0.00236283	Coding
Unc13a	177.989	-0.505962	0.127326	-3.97375	7.0751e-05	0.00240604	Coding
Blvrb	2479.1	0.44294	0.111454	3.97422	7.06113e-05	0.00240604	Coding
Cbl	638.198	-0.218369	0.0549744	-3.97218	7.12169e-05	0.0024161	Coding
Gbp10	61.1099	1.13256	0.285216	3.97089	7.16039e-05	0.00242345	Coding
Gm9396	70.2861	0.564138	0.142125	3.96931	7.20811e-05	0.00243381	Predicted
Gm7776	62.9792	0.738017	0.185978	3.96831	7.23851e-05	0.00243828	Predicted
Kif21b	114.916	-0.495681	0.124947	-3.96712	7.27465e-05	0.00244131	Coding
Endod1	292.499	-0.319726	0.0805987	-3.96688	7.28186e-05	0.00244131	Coding
Adipor2	715.196	-0.245762	0.0619748	-3.96552	7.32374e-05	0.00244958	Coding
Pdcd5-ps	143.855	0.424611	0.107144	3.96299	7.40166e-05	0.00246983	Noncoding
Hivep3	133.729	0.621693	0.157005	3.95971	7.50403e-05	0.00249812	Coding
Gm11336	43.661	0.922701	0.233065	3.95899	7.52684e-05	0.00249986	Predicted
Rcor2	361.03	-0.429605	0.108611	-3.95545	7.63897e-05	0.00253119	Coding
Rpl32-ps	89.5364	0.521261	0.131814	3.95454	7.66835e-05	0.00253502	Ribosomal
Plpp3	2261.38	0.352124	0.0890836	3.95273	7.72645e-05	0.0025483	Coding
Irf2	972.771	0.204729	0.0518926	3.94525	7.97183e-05	0.00262314	Coding
Fas	445.259	0.425901	0.108089	3.94029	8.13819e-05	0.0026717	Coding
AC120406.1	259.361	0.311071	0.0790193	3.93665	8.26284e-05	0.00270636	Noncoding
Cxcl10	3445.29	1.43075	0.36361	3.93486	8.32463e-05	0.00272034	Coding
Rps25-ps1	289.767	0.4075	0.103647	3.93162	8.43751e-05	0.00275041	Ribosomal
Hsp25-ps1	248.245	0.699469	0.177932	3.93111	8.45536e-05	0.00275041	Noncoding
Gm10419	44.5991	1.19168	0.303273	3.9294	8.51571e-05	0.00276372	Predicted
Vcl	1985.01	-0.165165	0.042068	-3.92614	8.63214e-05	0.00278566	Coding
Dbn1	1390.92	-0.208116	0.052999	-3.92679	8.60865e-05	0.00278566	Coding
Aff4	988.442	-0.223202	0.0568543	-3.92586	8.64211e-05	0.00278566	Coding
Uxs1	639.025	-0.229799	0.0585563	-3.92441	8.69412e-05	0.00279608	Coding
Dexi	446.182	0.27317	0.0696778	3.92048	8.83736e-05	0.00283573	Coding
2020-09-09	1015.37	-0.208681	0.0532641	-3.91784	8.93444e-05	0.00286043	Coding
Pxdc1	109.915	-0.521174	0.133073	-3.91644	8.98644e-05	0.00287061	Coding
5730559C18Rik	209.629	-0.44625	0.114147	-3.90943	9.25158e-05	0.00294868	Coding
Kitl	348.147	0.797095	0.204035	3.90666	9.35814e-05	0.00297597	Coding
Parp14	681.301	0.530542	0.135866	3.90488	9.42713e-05	0.00297793	Coding
Trp53i11	2415.5	-0.489249	0.12527	-3.90555	9.40118e-05	0.00297793	Coding
Klf9	552.441	0.33739	0.0863954	3.90518	9.41549e-05	0.00297793	Coding
Gm10293	10.9207	1.45867	0.373605	3.9043	9.44972e-05	0.00297844	Predicted
Polr2k	4234.58	0.132744	0.0340395	3.89969	9.63146e-05	0.00302901	Coding
Sectm1a	36.7985	1.29252	0.331523	3.89875	9.66911e-05	0.00303414	Coding
Osgin1	132.298	0.537921	0.137993	3.89818	9.69198e-05	0.00303462	Coding
Xpnpep1	1972.73	-0.179247	0.0460612	-3.89149	9.96316e-05	0.00311267	Coding
Pxdn	327.255	-0.379694	0.097683	-3.887	0.000101492	0.00316361	Coding
Rpl36al	3467.82	0.252315	0.0649211	3.88648	0.000101707	0.00316361	Ribosomal
Sp110	509.705	0.400061	0.102972	3.88513	0.000102277	0.00317437	Coding
Myl12a	21724.4	-0.137201	0.0353333	-3.88305	0.000103155	0.00319464	Coding
Ncor2	697.911	-0.30082	0.077541	-3.8795	0.000104673	0.00323463	Coding
Rbx1-ps	156.474	0.387154	0.0998085	3.87896	0.000104902	0.00323468	Noncoding
Runx3	587.948	-0.24649	0.0635706	-3.87742	0.000105571	0.00324826	Coding
Neurl3	11.8808	1.69454	0.437138	3.87644	0.000105996	0.00325429	Coding
Tapbpl	937.094	0.446099	0.115105	3.8756	0.000106363	0.00325852	Coding
Rnf10	1936.22	-0.145965	0.0376756	-3.87427	0.000106945	0.00326931	Coding
Tmem132a	174.347	-0.378479	0.0977132	-3.87336	0.000107343	0.00327443	Coding
Gmpr	231.497	-0.370061	0.0955844	-3.87156	0.000108141	0.00329169	Coding
Fblim1	1044.48	-0.202285	0.0522754	-3.8696	0.000109013	0.00330408	Coding
Acta2	11706.6	-0.323774	0.0836681	-3.86974	0.00010895	0.00330408	Coding
C1ra	408.387	0.313021	0.080947	3.86699	0.000110187	0.00333257	Coding
Pfkl	4304.05	-0.264571	0.0684453	-3.86544	0.000110888	0.00333956	Coding
Gm10036	46.3773	0.689357	0.178321	3.86582	0.000110716	0.00333956	Predicted
AC155266.1	17.0365	-1.06898	0.276607	-3.86464	0.000111254	0.00334351	Noncoding
Cep170	942.004	-0.321027	0.0830973	-3.86327	0.000111881	0.00335524	Coding
Samd9l	1201.05	0.257893	0.0667736	3.8622	0.000112371	0.00336285	Coding
Fbxo45	139.446	-0.383965	0.0994749	-3.85992	0.000113423	0.00338721	Coding
Sp1	664.868	-0.252609	0.0655353	-3.85454	0.000115947	0.00345533	Coding
Mex3b	126.19	-0.534323	0.138727	-3.85161	0.000117345	0.00348901	Coding
Usp22	673.618	-0.254305	0.0660425	-3.85063	0.000117814	0.00348901	Coding
Tnfrsf23	105.722	-0.600261	0.155879	-3.85082	0.000117722	0.00348901	Coding
Gopc	525.732	-0.258318	0.0671028	-3.84959	0.000118315	0.00349658	Coding
Gm11560	98.4475	0.587622	0.152808	3.84549	0.000120314	0.00354826	Predicted
Cep350	323.375	-0.308272	0.0802323	-3.84224	0.000121916	0.00358807	Coding
Tbc1d8b	186.387	-0.351783	0.0917416	-3.83449	0.000125824	0.003682	Coding
Dab2	1522.96	0.206687	0.0539026	3.83446	0.000125843	0.003682	Coding
Arid3a	173.326	-0.344495	0.089844	-3.83437	0.000125885	0.003682	Coding
Gm4149	617.201	0.252835	0.065963	3.83299	0.000126597	0.00369524	Predicted
Clic1	18245	-0.122562	0.0319904	-3.8312	0.00012752	0.00371169	Coding
Phactr4	763.765	-0.232148	0.0605989	-3.83089	0.000127683	0.00371169	Coding
Snhg1	6155.83	0.183188	0.0478309	3.8299	0.000128194	0.00371895	Noncoding
Vwa5a	673.166	0.205784	0.053739	3.82932	0.000128497	0.00372012	Coding
Sod3	476.38	0.496066	0.129568	3.82862	0.000128864	0.00372317	Coding
Kif1c	336.575	-0.281359	0.0737457	-3.81526	0.000136038	0.00392248	Coding
Setd2	455.346	-0.227721	0.0596988	-3.81449	0.000136462	0.00392673	Coding
Gm11703	133.683	0.395891	0.103875	3.81122	0.000138281	0.00397104	Predicted
Gm10131	59.1451	0.627685	0.164761	3.80967	0.00013915	0.00398794	Predicted
Acod1	191.5	1.74956	0.45945	3.80795	0.000140123	0.00400773	Coding
Ankrd37	2315.46	-0.551419	0.144843	-3.80702	0.000140653	0.00401481	Coding
Itpr3	381.607	-0.250391	0.0658046	-3.80506	0.000141769	0.00403858	Coding
Rc3h1	594.15	-0.234907	0.0617451	-3.80447	0.000142109	0.00403983	Coding
Gm5644	217.189	0.307988	0.0809643	3.80399	0.000142382	0.00403983	Predicted
Smad5	528.809	-0.22822	0.060011	-3.80297	0.00014297	0.0040404	Coding
Tbl2	288.279	-0.356561	0.0937546	-3.80313	0.000142879	0.0040404	Coding
Myl6	31355.4	-0.14362	0.0378148	-3.79799	0.000145874	0.00409862	Coding
Uqcc2	5496.61	0.158396	0.0417057	3.79795	0.000145895	0.00409862	Coding
Insl6	2469.44	0.223812	0.0589245	3.79828	0.000145702	0.00409862	Coding
Cltb	1619.98	0.199324	0.0525089	3.79601	0.000147043	0.00412272	Coding
Farp1	694.534	-0.254877	0.0671689	-3.79457	0.000147898	0.00413377	Coding
Dynlt1-ps1	20.3014	1.06127	0.279697	3.79437	0.000148019	0.00413377	Noncoding
Gm10925	158.186	0.411869	0.108607	3.79229	0.000149262	0.00416031	Predicted
Tuba1a	7202.72	-0.399927	0.105526	-3.78983	0.000150751	0.00418541	Coding
Bcorl1	88.2134	-0.468763	0.12368	-3.79014	0.000150562	0.00418541	Coding
Acsl4	867.233	-0.246868	0.065322	-3.77926	0.000157297	0.0043583	Coding
Rpl10a-ps1	2003.47	0.153248	0.0405548	3.77879	0.000157592	0.0043583	Ribosomal
Gm15427	5374.61	0.135333	0.0358559	3.77435	0.000160423	0.00442798	Predicted
Phtf1	527.746	-0.249561	0.0661945	-3.77011	0.000163173	0.00449516	Coding
Rpl9-ps6	305.211	0.261184	0.069308	3.76845	0.000164267	0.00451656	Ribosomal
Pmvk	919.457	-0.578114	0.153454	-3.76735	0.00016499	0.00452768	Coding
Rpl3-ps1	2985.91	0.152162	0.0404618	3.76064	0.000169479	0.0046419	Ribosomal
Tuft1	202.819	-0.395871	0.105306	-3.75924	0.000170433	0.00465465	Coding
Gbp6	46.6724	0.980005	0.260735	3.75863	0.000170845	0.00465465	Coding
Spry2	399.604	-0.315679	0.0839905	-3.75851	0.000170927	0.00465465	Coding
Cd47	4469.52	0.130138	0.0346299	3.75797	0.000171298	0.00465584	Coding
Gm5844	44.9123	0.687896	0.183212	3.75464	0.000173589	0.00470911	Predicted
Fhl2	1909.15	-0.209214	0.0557295	-3.7541	0.000173964	0.00471028	Coding
Pdzd4	86.8939	-0.491179	0.131014	-3.74906	0.000177498	0.00479683	Coding
Gm10247	91.8459	0.44541	0.118835	3.74812	0.000178163	0.00480566	Predicted
Sntb2	961.871	0.220259	0.0587858	3.74681	0.000179098	0.00482174	Coding
AC152949.2	103.22	0.46076	0.123012	3.74567	0.000179915	0.00483457	Noncoding
Sp100	492.213	0.411131	0.109826	3.74347	0.000181493	0.00486778	Coding
Gm9457	43.2842	0.65787	0.175897	3.74009	0.000183957	0.00492457	Predicted
Ifi202b	4207.65	0.260914	0.0699463	3.73021	0.000191322	0.00511212	Coding
Oxct1	2273.51	0.173098	0.0464393	3.7274	0.000193465	0.00515968	Coding
Rps27	45476.6	-0.1246	0.033454	-3.72452	0.000195689	0.0052092	Ribosomal
Prrx1	1743.65	0.204023	0.0547929	3.72352	0.000196462	0.00522002	Coding
Casp1	2458.25	0.386815	0.104039	3.71796	0.000200836	0.00532627	Coding
Arhgap22	671.716	-0.233386	0.062784	-3.71728	0.00020138	0.00533077	Coding
Ndrg2	75.6683	-0.787961	0.212373	-3.71027	0.00020704	0.0054704	Coding
Pde6d	679.985	-0.185351	0.0499737	-3.70897	0.000208107	0.00548839	Coding
Zfp516	363.119	-0.271309	0.0731678	-3.70805	0.000208864	0.00549815	Coding
Saa3	92.0253	1.12236	0.302741	3.70731	0.000209471	0.00550395	Coding
Vasp	2894.3	-0.180711	0.0487604	-3.70611	0.00021047	0.00551999	Coding
Mpeg1	147.934	1.47871	0.399417	3.70218	0.000213754	0.00559579	Coding
Adamts7	52.0323	-0.706954	0.191006	-3.70121	0.000214572	0.00560686	Coding
F2r	628.37	-0.265819	0.0718639	-3.69892	0.000216515	0.00564727	Coding
Map4k4	1279.84	-0.205083	0.0556055	-3.68818	0.000225865	0.00588034	Coding
Gm45855	83.4983	0.573135	0.155629	3.68269	0.000230785	0.00599746	Predicted
Ifnar2	545.177	0.289151	0.0785271	3.68219	0.000231241	0.00599834	Coding
Psmb10	11175.5	0.47012	0.127715	3.68102	0.000232302	0.00601488	Coding
Gfpt1	940.527	-0.172212	0.0468098	-3.67897	0.000234176	0.00605058	Coding
Gnas	20582.1	-0.129402	0.035177	-3.67858	0.000234532	0.00605058	Coding
Rpl38-ps2	327.481	0.287404	0.0781778	3.67628	0.000236661	0.00609444	Ribosomal
Trpc4ap	562.514	-0.215661	0.0586997	-3.67398	0.000238804	0.00613852	Coding
Gm11675	52.6527	0.618554	0.168534	3.67021	0.000242355	0.00621854	Predicted
Msmo1	5757.36	-0.495995	0.135218	-3.6681	0.000244356	0.0062586	Coding
Mtss1	1167.51	-0.310313	0.084678	-3.66463	0.000247699	0.00633281	Coding
Tnf	213.342	0.66761	0.182337	3.66141	0.00025083	0.00640135	Coding
Gm14277	28.1866	0.826424	0.225861	3.65899	0.000253208	0.00644208	Predicted
Sh3bgrl3	6030.94	0.153668	0.0420039	3.65841	0.000253786	0.00644208	Coding
Ulbp1	324.796	-0.367566	0.100466	-3.65862	0.000253574	0.00644208	Coding
Samd1	636.06	-0.258386	0.0706591	-3.6568	0.000255382	0.00647105	Coding
AW011738	46.9844	0.66108	0.180805	3.65632	0.000255866	0.00647178	Coding
Rpl23a	14593.7	0.0926212	0.02536	3.65225	0.000259949	0.00656336	Ribosomal
Gm7676	49.903	0.598107	0.164103	3.64469	0.000267711	0.00673541	Predicted
Eif1b	2117.54	-0.198114	0.0543505	-3.64512	0.000267269	0.00673541	Coding
Rnf213	722.108	0.525467	0.144211	3.64375	0.000268697	0.00674827	Coding
Cux1	863.951	-0.201309	0.0553411	-3.63761	0.000275183	0.00689735	Coding
9530082P21Rik	202.351	0.34874	0.0958809	3.63721	0.000275603	0.00689735	Noncoding
Slc50a1	1377.88	0.179371	0.0493232	3.63664	0.000276216	0.00690055	Coding
Ido1	31.661	1.56802	0.431464	3.63419	0.000278854	0.00695424	Coding
Ahdc1	280.289	-0.285925	0.0787103	-3.63263	0.000280551	0.0069843	Coding
Timm8b	2229.95	0.144638	0.039835	3.63092	0.000282409	0.00700602	Coding
AC156576.4	57.0726	0.617793	0.170127	3.63136	0.00028193	0.00700602	Noncoding
Cited2	4501.36	-0.224627	0.061944	-3.6263	0.000287514	0.00712023	Coding
Gm12338	83.5439	0.481873	0.133006	3.62296	0.000291256	0.00720036	Predicted
Apol10b	2482.83	0.52457	0.145058	3.61627	0.000298884	0.00735439	Coding
Lrig1	445.36	-0.257647	0.0712493	-3.61613	0.000299039	0.00735439	Coding
Dhx15	2368.3	-0.163963	0.0453363	-3.61659	0.000298506	0.00735439	Coding
Islr	24.5017	1.52798	0.422747	3.6144	0.000301041	0.00739084	Coding
Cmpk2	241.64	0.452614	0.125305	3.6121	0.000303733	0.00744407	Coding
Gm4654	18.9123	1.14644	0.317479	3.61106	0.000304944	0.00746088	Predicted
Cyp51	3567.1	-0.498898	0.138251	-3.60864	0.000307811	0.00751809	Coding
Gm21399	38.2355	0.881228	0.244373	3.60607	0.000310866	0.0075797	Predicted
Gm6055	9.05906	1.5799	0.438197	3.60546	0.000311601	0.0075846	Predicted
Otud4	1241.03	-0.236878	0.065716	-3.60458	0.000312664	0.00759746	Coding
Sgpp1	392.488	0.259966	0.0721816	3.60156	0.000316315	0.00767308	Coding
Lrrc8a	333.302	-0.333278	0.0925752	-3.60008	0.000318124	0.00770381	Coding
Dip2a	249.048	-0.288809	0.080254	-3.59868	0.000319835	0.00773206	Coding
AC123720.1	381.272	0.291424	0.081034	3.59632	0.000322753	0.00775139	Noncoding
Fhl3	226.071	-0.290687	0.0808499	-3.59539	0.000323906	0.00775139	Coding
Gm15921	14.295	1.12601	0.313171	3.5955	0.000323764	0.00775139	Predicted
Fst	2224.87	1.04003	0.289187	3.5964	0.00032265	0.00775139	Coding
Tnks1bp1	438.202	-0.246104	0.0684278	-3.59656	0.000322457	0.00775139	Coding
Gm3571	453.666	-0.488458	0.135832	-3.59605	0.00032308	0.00775139	Predicted
Gngt1	18.31	-1.51379	0.421216	-3.59386	0.000325815	0.00778396	Coding
C230038L03Rik	44.806	-0.621049	0.172889	-3.59219	0.000327908	0.00782082	Noncoding
Igip	114.949	-0.413407	0.115111	-3.59137	0.000328944	0.00783239	Coding
Tmem106a	427.684	0.236517	0.0658869	3.58975	0.000330999	0.00786815	Coding
Prkce	351.519	0.316839	0.0883131	3.58768	0.000333631	0.00791746	Coding
Lrrc8c	209.912	-0.441065	0.122969	-3.58681	0.000334743	0.00793062	Coding
Mex3a	465.95	-0.32595	0.0908865	-3.58635	0.000335342	0.0079316	Coding
Adarb1	251.988	-0.497846	0.139031	-3.58082	0.000342514	0.00808778	Coding
Gm8355	49.597	0.594058	0.166539	3.56709	0.000360973	0.00850951	Predicted
Phldb2	325.472	-0.470445	0.131908	-3.56647	0.00036182	0.00851536	Coding
Plekhg2	232.424	-0.29943	0.0839678	-3.56601	0.000362461	0.00851635	Coding
Gm15843	45.0887	0.7094	0.198992	3.56498	0.00036389	0.0085358	Predicted
Gm8203	8.17044	1.48999	0.418236	3.56255	0.000367267	0.00860082	Predicted
Itga5	897.974	-0.222529	0.0625004	-3.56044	0.00037024	0.00865619	Coding
Nek1	290.209	-0.311719	0.0876095	-3.55805	0.000373612	0.00872069	Coding
Rnf5	426.25	-0.230888	0.064961	-3.55425	0.000379056	0.00880439	Coding
Serpina3f	10.1942	2.30223	0.647702	3.55447	0.000378748	0.00880439	Coding
Slc25a28	873.794	0.272663	0.0766963	3.5551	0.000377838	0.00880439	Coding
Magt1	1687.67	-0.191718	0.0539505	-3.55358	0.00038002	0.00881237	Coding
Fnbp1l	1033.77	-0.208458	0.0587301	-3.54942	0.000386078	0.00893826	Coding
Dnajc30	428.178	0.214512	0.0604697	3.54743	0.000389013	0.00899158	Coding
Gm2115	737.133	-0.261338	0.0736948	-3.54621	0.000390809	0.00901843	Predicted
Npc2	22518.7	0.183484	0.0517719	3.54408	0.000393987	0.00907703	Coding
Bmper	10.251	1.59938	0.451896	3.53927	0.000401235	0.00922905	Coding
Ddrgk1	1887.5	0.174926	0.0494793	3.53534	0.000407254	0.00935237	Coding
Nt5dc2	285.571	-0.424611	0.12015	-3.53402	0.000409288	0.00938393	Coding
Card10	297.031	-0.342721	0.0971918	-3.52623	0.000421513	0.00964865	Coding
Rlim	735.613	-0.175042	0.0496629	-3.52461	0.000424114	0.00969258	Coding
Thoc7	2757.45	-0.124623	0.0353693	-3.52348	0.000425915	0.00970253	Coding
Ctif	202.426	-0.301784	0.085643	-3.52374	0.000425498	0.00970253	Coding
Elk3	1341.36	-0.176162	0.0500539	-3.51945	0.000432435	0.00983531	Coding
Tjap1	855.402	-0.177585	0.0504683	-3.51873	0.000433611	0.00984628	Coding
Ccng2	842.053	-0.375016	0.106649	-3.51636	0.000437513	0.00990327	Coding
Cox8a	24603.8	0.129354	0.0367827	3.5167	0.000436948	0.00990327	Coding
Lgr6	8.73953	-1.47576	0.420227	-3.51182	0.000445056	0.0100351	Coding
Bst2	19909.7	0.46785	0.133247	3.51116	0.000446161	0.0100351	Coding
Mrps6	2016.97	0.178422	0.0508108	3.5115	0.000445588	0.0100351	Coding
Ero1l	5944.84	-0.350269	0.0997338	-3.51204	0.000444688	0.0100351	Coding
Itgb7	425.682	1.57925	0.449956	3.5098	0.000448446	0.0100706	Coding
Gm12174	35.9662	0.662442	0.188836	3.50803	0.000451443	0.0101219	Predicted
Gm28727	19.2317	1.04109	0.296834	3.5073	0.000452671	0.0101334	Predicted
Tenm4	619.297	-0.302135	0.0862084	-3.5047	0.000457117	0.0102169	Coding
Rpl13a-ps1	53.3742	0.628097	0.179302	3.503	0.000460043	0.0102661	Ribosomal
Ap2a2	659.135	-0.21172	0.0604519	-3.50229	0.000461269	0.0102773	Coding
Samd4	345.661	-0.271652	0.0776077	-3.50032	0.000464707	0.0103377	Coding
Gm6520	59.9118	0.572267	0.163532	3.49942	0.000466279	0.0103565	Predicted
Notch1	372.338	0.379327	0.108534	3.49499	0.000474072	0.0105122	Coding
Gm45454	95.3754	0.450745	0.128983	3.4946	0.000474771	0.0105122	Predicted
Pnpla7	251.216	0.408371	0.117204	3.48427	0.000493475	0.0109094	Coding
Plau	1209.36	-0.334108	0.0959116	-3.4835	0.000494902	0.010924	Coding
1110008P14Rik	586.082	0.189821	0.0545023	3.48282	0.000496166	0.0109349	Coding
Rnf19b	1313.55	0.381908	0.10967	3.48234	0.000497052	0.0109374	Coding
Ly6e	19836.3	0.339256	0.097532	3.47841	0.000504407	0.0110821	Coding
Gm12989	79.5241	0.497112	0.142948	3.47757	0.000505973	0.0110994	Predicted
Tead1	1048.8	-0.169825	0.0488402	-3.47715	0.000506783	0.0111	Coding
Psme1	13549.1	0.279551	0.0804462	3.475	0.00051085	0.0111719	Coding
Flywch2	661.134	0.301498	0.0868426	3.47177	0.000517035	0.0112898	Coding
Gm7363	64.023	0.485089	0.139761	3.47085	0.000518811	0.0113112	Predicted
Mfhas1	550.798	-0.244982	0.0706103	-3.4695	0.000521436	0.0113219	Coding
Bst1	4529.48	0.219497	0.0632568	3.46994	0.000520584	0.0113219	Coding
Gm15500	4821.8	-0.177463	0.0511515	-3.46936	0.000521693	0.0113219	Predicted
Tes	2949.62	-0.158328	0.0456807	-3.46597	0.000528318	0.0114308	Coding
AC117245.4	35.9724	0.667202	0.192484	3.46627	0.000527732	0.0114308	Noncoding
Mrpl57	2076.44	0.173681	0.0501271	3.46482	0.000530586	0.0114624	Coding
Serpinb9	1665.45	0.4328	0.125001	3.46238	0.000535414	0.0115492	Coding
Aup1	1470.66	0.25762	0.0744148	3.46194	0.000536301	0.0115508	Coding
Fkbp5	317.195	-0.302472	0.0874987	-3.45687	0.000546485	0.01172	Coding
Aifm2	597.002	0.227024	0.0656747	3.4568	0.000546632	0.01172	Coding
Ivns1abp	838.63	-0.258748	0.0748402	-3.45734	0.000545526	0.01172	Coding
Gm14760	7.83267	1.53277	0.444078	3.45157	0.000557329	0.0119314	Predicted
1190002N15Rik	191.859	-0.403492	0.116936	-3.45054	0.000559461	0.011959	Coding
Tnc	23.5466	-1.35237	0.392048	-3.4495	0.00056162	0.0119871	Coding
Eno1b	160.017	0.328157	0.0951803	3.44774	0.000565293	0.0120474	Coding
Lrp5	158.58	-0.378734	0.110013	-3.44264	0.000576066	0.0122586	Coding
Ep300	541.785	-0.233391	0.0678124	-3.44171	0.000578046	0.0122824	Coding
Mir6236	133.392	-0.502382	0.14619	-3.4365	0.000589274	0.0125023	Noncoding
Pnpla2	402.798	0.347568	0.101173	3.4354	0.000591686	0.0125161	Coding
Egln1	5077.23	-0.33959	0.0988401	-3.43575	0.000590919	0.0125161	Coding
Rpl13-ps6	145.405	0.33661	0.0981144	3.43079	0.000601829	0.0127117	Ribosomal
Abi1	790.656	-0.181897	0.0531213	-3.42417	0.000616671	0.0130059	Coding
Gpx4	7637.52	-0.128202	0.0374513	-3.42316	0.000618972	0.0130351	Coding
Gtf3c4	229.74	-0.276593	0.0809572	-3.41654	0.000634225	0.0133366	Coding
Hip1r	78.7225	-0.472298	0.138591	-3.40786	0.000654744	0.0137477	Coding
2700060E02Rik	5113.97	0.103547	0.0304161	3.40433	0.000663269	0.0139062	Coding
Mettl1	950.148	0.295049	0.0866804	3.40387	0.000664379	0.0139089	Coding
Arrb1	142.867	-0.474154	0.139338	-3.40289	0.000666765	0.0139383	Coding
Limd2	735.795	-0.220943	0.0649986	-3.3992	0.000675831	0.0141071	Coding
Trip12	980.197	-0.155088	0.0456434	-3.39783	0.000679235	0.0141574	Coding
Rybp	387.767	-0.244922	0.0721385	-3.39516	0.000685882	0.014275	Coding
Akr1b10	312.592	0.299434	0.0882899	3.39149	0.000695147	0.014425	Coding
Rap1gds1	361.873	-0.229568	0.0676821	-3.39185	0.000694218	0.014425	Coding
Dock5	249.942	-0.300424	0.0885921	-3.3911	0.000696136	0.014425	Coding
Gnpat	371.258	-0.219658	0.0648037	-3.38958	0.000699987	0.0144837	Coding
Kdm1a	1865.5	-0.160884	0.0474702	-3.38915	0.000701099	0.0144856	Coding
Gm12346	425.675	0.315755	0.0931855	3.38846	0.000702871	0.0145012	Predicted
Apol7a	119.36	0.500748	0.147818	3.3876	0.00070506	0.0145253	Coding
Gm45774	18.1712	0.88854	0.262353	3.38681	0.000707102	0.0145462	Predicted
Plxnb2	1176.68	-0.213959	0.063182	-3.38639	0.000708185	0.0145475	Coding
CT025555.1	83.6021	0.428439	0.126539	3.38582	0.000709659	0.0145567	Noncoding
Tlr3	225.501	0.346043	0.102229	3.38497	0.000711864	0.0145809	Coding
Fam58b	355.569	0.220679	0.0652484	3.38213	0.000719252	0.014711	Coding
Lzts3	21.3267	-0.879882	0.260266	-3.38071	0.000722998	0.0147216	Coding
Avpi1	6047.65	0.27822	0.0822796	3.3814	0.000721187	0.0147216	Coding
Psen2	155.659	0.334678	0.0990065	3.38036	0.000723911	0.0147216	Coding
Tm9sf3	3366.43	-0.132175	0.039092	-3.38113	0.000721887	0.0147216	Coding
Creg1	1005.91	0.592388	0.175316	3.37898	0.000727562	0.0147747	Coding
Larp4b	917.198	-0.161617	0.0478465	-3.37782	0.000730618	0.0147973	Coding
Cdk2ap2	2930.25	0.25274	0.0748245	3.37777	0.000730755	0.0147973	Coding
Pcgf2	225.166	-0.275733	0.0816591	-3.37663	0.000733793	0.0148377	Coding
Parp12	1035.56	0.447828	0.132666	3.3756	0.000736556	0.0148724	Coding
Anapc4	1002.95	-0.179657	0.0533543	-3.36724	0.000759237	0.0153086	Coding
Gm14539	53.7365	0.516756	0.153574	3.36486	0.000765817	0.0154194	Predicted
Nop10	2828.69	0.281908	0.0838031	3.36393	0.000768409	0.0154497	Coding
Sqle	3420.99	-0.366394	0.109042	-3.36012	0.000779095	0.0156424	Coding
Gm10040	529.539	-0.486712	0.144869	-3.35967	0.000780355	0.0156456	Predicted
Fat1	993.713	-0.175255	0.0521702	-3.35928	0.000781456	0.0156456	Coding
Gm5430	79.9129	0.427927	0.127532	3.35544	0.000792388	0.0158422	Predicted
Btf3l4	481.138	-0.222455	0.066352	-3.35265	0.000800404	0.01598	Coding
N4bp2	176.41	-0.323893	0.0966402	-3.35153	0.00080365	0.0160223	Coding
Gm8730	18204.3	-0.115139	0.0343702	-3.34995	0.000808249	0.0160914	Predicted
Lpcat4	132.425	-0.480434	0.143609	-3.34542	0.000821568	0.0163315	Coding
Gm5093	40.9664	0.685307	0.204871	3.34507	0.000822607	0.0163315	Predicted
Atn1	731.24	-0.20328	0.0608164	-3.34252	0.000830213	0.0164595	Coding
2020-09-02	47.7364	-0.556341	0.166585	-3.33968	0.000838754	0.0166057	Coding
Uqcr10	5026.18	0.18444	0.055236	3.33914	0.000840392	0.016615	Coding
Casp12	725.138	0.222594	0.066743	3.33509	0.000852711	0.0168351	Coding
Mmp10	106.544	-0.890593	0.267092	-3.3344	0.000854822	0.0168534	Coding
Tlr2	211.832	0.370993	0.11133	3.33237	0.000861102	0.0169537	Coding
Inhba	2672.19	-0.334357	0.100524	-3.32613	0.00088061	0.0173138	Coding
Gm16580	67.9919	0.593919	0.178734	3.32292	0.000890795	0.0174898	Predicted
Nudcd3	963.271	-0.185329	0.0557929	-3.32173	0.000894606	0.0175404	Coding
Fbxw17	130.135	0.367265	0.11072	3.31707	0.00090966	0.017811	Coding
Fuom	473.457	0.218712	0.0659582	3.31592	0.000913417	0.01786	Coding
Fgf2	105.122	-0.678196	0.204787	-3.31171	0.000927262	0.0181058	Coding
Steap3	292.381	0.514371	0.155342	3.31121	0.00092894	0.0181137	Coding
Parp9	915.634	0.270129	0.0816044	3.31023	0.000932202	0.0181524	Coding
Traf3	376.376	-0.255132	0.0770975	-3.30921	0.000935588	0.0181934	Coding
Gm4950	199.296	0.296904	0.0897613	3.3077	0.000940657	0.0182614	Predicted
Gm6030	35.4608	0.643338	0.194514	3.3074	0.000941653	0.0182614	Predicted
Ust	197.342	-0.400325	0.121125	-3.30507	0.000949544	0.0183893	Coding
Rest	1570.17	-0.138761	0.0420354	-3.30106	0.000963205	0.0186032	Coding
Zfp575	178.17	-0.422253	0.127911	-3.30114	0.000962912	0.0186032	Coding
Ch25h	705.345	0.270745	0.082101	3.29771	0.000974776	0.0188011	Coding
Camsap2	255.854	-0.346945	0.105317	-3.29431	0.000986632	0.019004	Coding
Gm20559	443.827	0.336132	0.102053	3.29371	0.00098876	0.0190192	Predicted
Hnrnpa0	10233.5	-0.0918767	0.0279561	-3.28647	0.00101452	0.0194884	Coding
Fads2	99.9822	-0.519943	0.158352	-3.28346	0.00102543	0.0196714	Coding
Scd2	5578.83	-0.467793	0.142494	-3.28289	0.0010275	0.0196844	Coding
Bcr	353.605	-0.224818	0.0685077	-3.28165	0.00103201	0.0197444	Coding
Gm8000	12.2689	1.32402	0.403717	3.27957	0.00103965	0.019837	Predicted
Prepl	284.769	-0.243284	0.074174	-3.27991	0.00103841	0.019837	Coding
Fam160a1	106.241	-0.372258	0.113543	-3.27857	0.00104336	0.0198812	Coding
Gm340	117.771	-0.348688	0.106446	-3.27574	0.00105386	0.0200544	Coding
Synm	13.4238	-1.19889	0.366135	-3.27444	0.00105872	0.0201128	Coding
Pim1	926.191	0.326516	0.0997251	3.27416	0.00105976	0.0201128	Coding
Tspan9	904.345	-0.209696	0.0640756	-3.27263	0.0010655	0.0201536	Coding
Phrf1	351.522	-0.254821	0.0778607	-3.27278	0.00106497	0.0201536	Coding
Itpka	58.3447	0.895582	0.273673	3.27246	0.00106617	0.0201536	Coding
Pnp	1774.3	0.372974	0.11412	3.26827	0.00108209	0.0204275	Coding
Spats2	878.07	-0.171649	0.0525887	-3.264	0.00109852	0.0207102	Coding
Gm19514	11.6957	-1.15154	0.353151	-3.26076	0.00111114	0.0209203	Predicted
Ywhae	10114.3	-0.118102	0.0362797	-3.25531	0.00113268	0.0212977	Coding
Col18a1	1531.68	-0.387284	0.118998	-3.25455	0.00113572	0.0212985	Coding
Lsm14b	336.37	-0.265264	0.0815042	-3.25461	0.00113549	0.0212985	Coding
Slx4	56.773	-0.490694	0.150865	-3.25253	0.00114382	0.0213939	Coding
Fbxo11	368.692	-0.252533	0.0776385	-3.25268	0.00114323	0.0213939	Coding
H2-Ea-ps	37.6903	1.25377	0.385536	3.25202	0.00114586	0.021404	Noncoding
Gm8337	19.4196	0.856306	0.263522	3.24946	0.00115624	0.0215695	Predicted
Kmt2d	283.914	-0.274067	0.0843758	-3.24817	0.00116151	0.0216111	Coding
Tmem171	162.846	0.411636	0.126726	3.24824	0.0011612	0.0216111	Coding
Rgs3	215.266	0.457936	0.141032	3.24704	0.00116612	0.0216685	Coding
F630040K05Rik	12.5794	-1.12215	0.345884	-3.2443	0.00117738	0.0218492	Noncoding
Nuak2	221.016	-0.327458	0.100979	-3.24284	0.00118346	0.0219333	Coding
1700006J14Rik	33.9975	-0.673587	0.207863	-3.24054	0.00119305	0.0220352	Noncoding
Pla2g16	4449.19	0.188037	0.0580162	3.24111	0.00119067	0.0220352	Coding
Fam53a	871.117	0.254233	0.0784573	3.2404	0.0011936	0.0220352	Coding
Snrnp25	661.36	-0.218415	0.0674225	-3.2395	0.00119741	0.0220767	Coding
Gm5921	225.938	0.279587	0.0864065	3.23572	0.00121337	0.0223132	Predicted
Stard4	865.152	-0.501009	0.154835	-3.23576	0.0012132	0.0223132	Coding
Acss2	192.35	-0.465952	0.144024	-3.23523	0.00121544	0.0223221	Coding
Ubr5	1312.84	-0.138265	0.0427422	-3.23487	0.001217	0.0223221	Coding
Gtf2e2	1772.17	-0.133578	0.0413191	-3.23285	0.00122564	0.0224227	Coding
S100a8	99.61	0.851163	0.263265	3.23311	0.00122452	0.0224227	Coding
Copa	928.92	-0.160887	0.049774	-3.23235	0.00122778	0.0224331	Coding
Stam	488.444	-0.234585	0.0726025	-3.23109	0.00123319	0.022503	Coding
Gm11605	19.9993	0.821731	0.254457	3.22935	0.0012407	0.022611	Predicted
Fgf11	48.7203	-0.581481	0.180171	-3.22739	0.00124927	0.0227379	Coding
Ptx3	554.038	0.553533	0.17155	3.22666	0.00125245	0.0227421	Coding
Mmp12	45.5358	-0.870663	0.269839	-3.2266	0.0012527	0.0227421	Coding
Gm7565	110.807	0.373378	0.115825	3.22362	0.00126579	0.0229338	Predicted
Gm38162	28.4781	0.670464	0.208046	3.22267	0.00127002	0.0229338	Predicted
Apbb2	553.403	-0.213877	0.0663546	-3.22325	0.00126747	0.0229338	Coding
Galnt1	836.617	-0.16801	0.0521365	-3.2225	0.00127078	0.0229338	Coding
Baiap2l1	27.7671	-0.737662	0.228919	-3.22238	0.00127132	0.0229338	Coding
Scamp2	693.186	0.189848	0.0589295	3.22161	0.00127471	0.0229658	Coding
Nov	180.785	0.741412	0.230404	3.21788	0.00129143	0.0232083	Coding
Mob3c	151.697	0.308827	0.0959666	3.21807	0.00129056	0.0232083	Coding
Sc5d	1055.78	-0.276766	0.0861033	-3.21435	0.00130741	0.0234066	Coding
Syngr2	1096.5	0.197605	0.0614757	3.21436	0.00130736	0.0234066	Coding
Gdap10	378.574	0.354695	0.110347	3.21435	0.0013074	0.0234066	Noncoding
Phlda1	17923.5	0.307697	0.0958353	3.21069	0.00132418	0.023677	Coding
Gm17541	29.521	0.698731	0.217821	3.20783	0.00133742	0.0238538	Predicted
Ddb1	3832.56	-0.133909	0.0417427	-3.20797	0.00133674	0.0238538	Coding
Prdx1	53537.7	0.275663	0.0860298	3.20428	0.00135403	0.024097	Coding
Vegfd	285.607	0.308083	0.0961502	3.20419	0.00135445	0.024097	Coding
4930453N24Rik	970.677	0.189913	0.0592903	3.20311	0.00135952	0.024157	Coding
Mir22hg	345.187	0.256016	0.0799819	3.20093	0.00136987	0.0243105	Noncoding
Rpl17-ps8	88.69	0.484348	0.151386	3.19942	0.00137705	0.0244074	Ribosomal
Zfp451	594.142	-0.193507	0.0605078	-3.19804	0.00138363	0.0244935	Coding
Bag2	798.434	-0.200253	0.0626358	-3.19709	0.00138819	0.0245437	Coding
Grhpr	899.949	-0.284391	0.0889753	-3.1963	0.00139204	0.0245812	Coding
Ddx60	480.47	0.331091	0.103626	3.19505	0.00139808	0.0246571	Coding
Herc3	255.324	-0.37318	0.116849	-3.1937	0.00140464	0.0247422	Coding
Csde1	5018.08	-0.0845354	0.0264857	-3.19173	0.00141421	0.0248596	Coding
Ostf1	4718.89	-0.216783	0.0679228	-3.19161	0.0014148	0.0248596	Coding
Gm14303	1381.87	0.13366	0.0419148	3.18886	0.00142836	0.0250668	Predicted
H2-T22	3515.28	0.283055	0.088788	3.18798	0.00143269	0.0251118	Coding
Zfp322a	248.163	-0.270696	0.0849583	-3.18622	0.00144144	0.0252031	Coding
Gm10269	153.719	0.333267	0.104591	3.18638	0.00144063	0.0252031	Predicted
Setd5	956.564	-0.167934	0.0527346	-3.18451	0.00145001	0.0253218	Coding
Zmym2	368.835	-0.259714	0.081644	-3.18106	0.00146737	0.0255934	Coding
Ube2l6	664.729	0.520322	0.163617	3.18013	0.0014721	0.0256446	Coding
Hdlbp	3755.29	-0.12817	0.0403229	-3.17859	0.00147996	0.0257498	Coding
Gm13588	6.89829	1.42761	0.449224	3.17794	0.00148323	0.0257753	Predicted
Il15ra	291	0.513584	0.161662	3.17689	0.00148863	0.0258375	Coding
Rpl22-ps1	54.6806	0.546218	0.172173	3.17249	0.00151135	0.0261999	Ribosomal
Fgd6	202.382	-0.279466	0.0881988	-3.1686	0.00153177	0.0263702	Coding
Cd7	10.1717	1.50115	0.473536	3.17009	0.0015239	0.0263702	Coding
Fcer1g	26.909	-1.11755	0.352615	-3.16931	0.001528	0.0263702	Coding
Anapc5	2043.79	-0.154764	0.0488302	-3.16943	0.00152738	0.0263702	Coding
Plod2	2378.19	-0.341108	0.107656	-3.16849	0.00153231	0.0263702	Coding
Arl4c	2780.2	-0.248188	0.0783155	-3.16907	0.00152925	0.0263702	Coding
AA467197	1760.36	1.12488	0.35525	3.16645	0.00154312	0.0264921	Coding
Gm10080	614.462	-0.177877	0.0561697	-3.16679	0.00154133	0.0264921	Predicted
Lemd3	163.446	-0.287163	0.0907025	-3.16599	0.00154556	0.0265019	Coding
Nfya	280.605	-0.250368	0.0791215	-3.16435	0.00155427	0.0266059	Coding
Hsd17b7	788.234	-0.475464	0.150266	-3.16415	0.00155537	0.0266059	Coding
Rps18-ps3	60.0432	0.50954	0.161081	3.16325	0.00156017	0.026656	Ribosomal
Gm12286	29.2954	0.714015	0.225751	3.16285	0.00156234	0.0266611	Predicted
Twistnb	1969.32	0.135775	0.0429404	3.16195	0.00156717	0.0267115	Coding
Myo1e	815.054	-0.242858	0.0768294	-3.16101	0.00157225	0.0267659	Coding
H2-K1	49796.7	0.177909	0.0562958	3.16026	0.00157629	0.0268026	Coding
Gm15452	10.8652	1.17345	0.371515	3.15855	0.00158559	0.0269285	Predicted
Gm15710	153.081	0.337732	0.107011	3.15606	0.00159918	0.0270624	Predicted
Smtnl2	26.6764	-0.764159	0.242105	-3.15631	0.0015978	0.0270624	Coding
Fbxw4	472.166	-0.189775	0.0601212	-3.15653	0.00159656	0.0270624	Coding
Hk1	1026.63	-0.217978	0.0691745	-3.15113	0.00162642	0.0274905	Coding
Oas1a	285.822	0.532476	0.169012	3.15053	0.00162974	0.027514	Coding
Snx13	353.93	-0.346183	0.109914	-3.1496	0.00163495	0.0275365	Coding
Tmem192	1163.44	0.220231	0.0699187	3.14982	0.00163372	0.0275365	Coding
Gm11425	25.1097	0.940346	0.298637	3.14879	0.00163946	0.0275798	Predicted
mt-Co2	256.754	0.353229	0.112204	3.1481	0.00164337	0.0276128	Mitochondrial
Hmgb1-ps7	15.6832	0.886986	0.28186	3.1469	0.0016501	0.0276932	Noncoding
Calm3	1881.09	-0.123009	0.0391006	-3.14597	0.00165539	0.0277493	Coding
Ppp6r3	334.818	-0.208793	0.0663976	-3.14458	0.00166323	0.0277824	Coding
Asap2	239.31	-0.34001	0.108119	-3.14479	0.00166207	0.0277824	Coding
Pcyt1b	302.065	-0.273217	0.0868745	-3.14496	0.00166108	0.0277824	Coding
Ifi44l	36.9873	0.828081	0.263463	3.14306	0.00167191	0.0278946	Coding
Gjb4	1027.54	-0.245157	0.0780199	-3.14223	0.00167665	0.0279239	Coding
Sptan1	741.562	-0.261803	0.0833218	-3.14207	0.0016776	0.0279239	Coding
Mcrip2	214.309	0.604154	0.192364	3.14067	0.0016856	0.0280243	Coding
Gm29228	23.9095	0.736063	0.234682	3.13643	0.00171019	0.0283999	Predicted
Neurl4	104.95	-0.367506	0.117232	-3.13485	0.00171942	0.0285199	Coding
Pdzd8	848.964	-0.17599	0.0561514	-3.13421	0.0017232	0.0285493	Coding
Ets2	406.304	-0.302638	0.0965992	-3.13293	0.00173072	0.0286405	Coding
Hyal2	303.271	-0.274995	0.0878312	-3.13095	0.00174244	0.028801	Coding
Macf1	1279.54	-0.172205	0.0550214	-3.12979	0.00174931	0.02885	Coding
Txnip	620.877	0.345158	0.110282	3.12976	0.00174947	0.02885	Coding
Prl2c2	77.4904	1.43994	0.460421	3.12745	0.00176327	0.0290211	Coding
Gm26917	1758.38	-0.176499	0.0564372	-3.12734	0.00176393	0.0290211	Predicted
Ubqln2	489.991	-0.209834	0.0671083	-3.1268	0.00176721	0.0290415	Coding
Ktn1	2410.4	-0.147532	0.0471901	-3.12634	0.00176999	0.0290537	Coding
Il17rc	1503.23	0.222696	0.0712784	3.12432	0.00178217	0.029119	Coding
Rps4x-ps	86.772	0.408949	0.130865	3.12497	0.00177821	0.029119	Ribosomal
Gm44291	63.5628	-0.459642	0.147097	-3.12475	0.00177954	0.029119	Predicted
Nol12	1986.64	0.152329	0.0487558	3.12433	0.00178209	0.029119	Coding
Rpl34-ps2	18.9151	0.805089	0.257785	3.12311	0.00178953	0.0292056	Ribosomal
Men1	348	-0.255402	0.0818921	-3.11876	0.00181615	0.0296062	Coding
Oas1g	140.304	0.60716	0.194769	3.11733	0.00182496	0.0297157	Coding
Tmed9	5960.11	-0.0923373	0.0296418	-3.11511	0.00183877	0.0299063	Coding
Grina	2419.61	0.152464	0.0489606	3.11402	0.00184554	0.0299822	Coding
Zfp664	809.564	-0.240663	0.0772975	-3.11347	0.00184902	0.0300043	Coding
Gm6472	3280.07	0.11188	0.0359525	3.11188	0.00185898	0.0300973	Predicted
AC147029.1	19.4161	0.856165	0.275119	3.11198	0.0018584	0.0300973	Noncoding
Kdm2a	1012.32	-0.202251	0.0650231	-3.11045	0.00186806	0.0302098	Coding
Kpna4	1019.81	-0.167677	0.0539218	-3.10963	0.00187322	0.0302589	Coding
Gm2796	13.6041	0.973905	0.31328	3.10874	0.00187887	0.0302814	Predicted
Zfp703	713.639	-0.244699	0.0787086	-3.10893	0.00187766	0.0302814	Coding
Anxa2	22144	-0.129265	0.0415951	-3.1077	0.00188546	0.0303532	Coding
Gm10086	56.3794	0.49088	0.158311	3.10074	0.00193041	0.0310415	Predicted
Scpep1	1354.29	0.207916	0.0671215	3.09761	0.0019509	0.0313357	Coding
Rnf217	633.071	-0.283075	0.0914746	-3.09458	0.00197094	0.0316218	Coding
Ppl	75.8203	0.53634	0.173444	3.0923	0.00198614	0.0318298	Coding
Maml1	166.537	-0.318487	0.103009	-3.09184	0.00198917	0.0318424	Coding
Ctdsp2	1395.34	-0.140972	0.0456267	-3.08967	0.00200378	0.0320402	Coding
Cebpd	842.545	0.471394	0.152597	3.08913	0.0020074	0.0320621	Coding
H2afj	5355.77	0.196924	0.0638026	3.08646	0.00202554	0.0323154	Coding
Cyp4v3	187.973	0.375578	0.121762	3.08453	0.00203871	0.0324891	Coding
Sod2	3383.53	0.398549	0.129241	3.08376	0.00204404	0.0325376	Coding
F11r	245.674	-0.296417	0.0961466	-3.08297	0.00204948	0.0325877	Coding
Slc35b4	161.418	-0.32854	0.106581	-3.08255	0.00205238	0.0325972	Coding
Adam33	9.00992	1.35558	0.439988	3.08094	0.00206347	0.0326793	Coding
Gm7332	224.101	0.306651	0.0995361	3.0808	0.00206444	0.0326793	Predicted
Atp11a	378.269	-0.246581	0.0800271	-3.08122	0.00206153	0.0326793	Coding
Agrn	496.358	-0.33232	0.107881	-3.08043	0.00206701	0.0326835	Coding
Rps13	44079.3	0.0758242	0.0246211	3.07964	0.00207254	0.0327346	Ribosomal
Gapdh-ps14	12.9315	1.01532	0.329733	3.07921	0.00207549	0.0327448	Noncoding
Rasa1	1582.85	-0.276017	0.0896586	-3.07854	0.0020802	0.0327625	Coding
Bloc1s4	857.199	0.156538	0.0508506	3.07839	0.00208122	0.0327625	Coding
Gm5100	19.1655	0.886129	0.287944	3.07743	0.00208791	0.0327958	Predicted
Daxx	397.288	0.302991	0.098456	3.07743	0.00208795	0.0327958	Coding
Gm7561	59.0867	0.496729	0.161539	3.07498	0.00210516	0.0330296	Predicted
Gm3531	79.1132	0.495003	0.161092	3.0728	0.00212064	0.0330778	Predicted
Mrpl13	6720.1	0.280599	0.0913013	3.07333	0.00211685	0.0330778	Coding
Rpp40	449	0.241431	0.0785464	3.07374	0.00211394	0.0330778	Coding
Frmd6	923.474	-0.273277	0.0889498	-3.07226	0.00212443	0.0330778	Coding
Psme2	9032.97	0.314861	0.102485	3.07225	0.00212452	0.0330778	Coding
Scn3a	152.14	-0.664586	0.216214	-3.07374	0.00211392	0.0330778	Coding
Ndufb4	389.099	0.265732	0.0864697	3.07312	0.0021183	0.0330778	Coding
Rps23-ps1	1387.54	0.188155	0.0612972	3.06955	0.0021438	0.0332751	Ribosomal
2610005L07Rik	306.826	-0.314941	0.102604	-3.06949	0.00214421	0.0332751	Noncoding
Csnk1g2	1954	-0.156997	0.0511413	-3.06987	0.00214155	0.0332751	Coding
Rapsn	52.4332	-0.497203	0.16201	-3.06896	0.00214805	0.0332874	Coding
Erg28	2467.77	-0.227868	0.0742548	-3.06873	0.00214969	0.0332874	Coding
Tpi1	21359.8	-0.172136	0.0561025	-3.06825	0.00215316	0.0333049	Coding
Rps12-ps9	66.5124	0.493544	0.160934	3.06675	0.00216397	0.0334357	Ribosomal
Nlrc5	509.249	0.28329	0.0924001	3.06591	0.00217011	0.0334942	Coding
Anapc16	1426.26	-0.151646	0.0495075	-3.06308	0.00219071	0.0337754	Coding
Pafah1b3	3389.04	-0.248346	0.0811043	-3.06206	0.00219823	0.0338546	Coding
Ppp1r13b	181.193	-0.294095	0.0960722	-3.06118	0.00220464	0.0339166	Coding
Serpinf1	499.784	1.21211	0.396047	3.06052	0.00220952	0.033955	Coding
Smarca5	4375.43	-0.0977989	0.0319586	-3.06018	0.00221204	0.033957	Coding
Lsmem1	62.8613	-0.76016	0.248533	-3.05859	0.0022238	0.0341007	Coding
Clip4	654.322	0.229283	0.0749742	3.05815	0.00222705	0.0341138	Coding
Macc1	893.206	-0.250102	0.0817965	-3.05761	0.00223109	0.0341388	Coding
Arhgef5	1440.09	-0.139208	0.0455642	-3.05522	0.00224898	0.034365	Coding
Cdc42ep3	1376.18	0.200067	0.0654888	3.05499	0.00225071	0.034365	Coding
Cdk13	632.078	-0.200962	0.0657959	-3.05433	0.00225562	0.034403	Coding
Zfhx3	2987.74	-0.159353	0.0521816	-3.05381	0.00225957	0.0344264	Coding
Efnb1	101.293	-0.430277	0.140947	-3.05276	0.00226744	0.0344355	Coding
Serf2	4195.13	0.110632	0.0362385	3.05289	0.00226646	0.0344355	Coding
Mmp9	15.4748	-0.976079	0.319688	-3.05323	0.00226396	0.0344355	Coding
Rab11fip3	65.2142	-0.442726	0.14509	-3.05138	0.00227789	0.0344512	Coding
Map3k8	189.384	0.389894	0.127768	3.05157	0.00227647	0.0344512	Coding
Plekhg4	12.6958	-0.958809	0.314165	-3.05193	0.00227377	0.0344512	Coding
Clasp1	273.413	-0.240113	0.0786907	-3.05135	0.00227817	0.0344512	Coding
Nppb	73.6795	0.926872	0.30385	3.05043	0.00228517	0.0345204	Coding
Dennd5a	474.032	-0.2281	0.0748727	-3.04651	0.00231518	0.0349366	Coding
Slc25a37	1271.78	0.206524	0.0678219	3.0451	0.00232606	0.0350636	Coding
Mdh1	3834.66	0.108364	0.0355977	3.04412	0.00233364	0.0351406	Coding
Me2	600.353	-0.326964	0.107484	-3.04199	0.00235021	0.0353526	Coding
Sat1	7056.56	0.230184	0.075711	3.04029	0.00236347	0.0355145	Coding
Gm16089	50.7653	0.528421	0.173978	3.03728	0.00238724	0.0358338	Predicted
4932438A13Rik	294.791	-0.232195	0.0764882	-3.0357	0.00239978	0.035984	Coding
Gm27219	27.8401	0.691345	0.227972	3.03259	0.00242466	0.0363188	Predicted
Gm12168	25.7191	0.698526	0.230368	3.03222	0.00242764	0.0363252	Predicted
Asph	612.82	-0.260283	0.0859229	-3.02927	0.00245148	0.0366048	Coding
Gm44013	118.203	0.615291	0.203113	3.0293	0.00245119	0.0366048	Predicted
Pde7a	343.234	-0.297116	0.0981118	-3.02835	0.00245895	0.0366779	Coding
Il1rl1	11234.3	0.314027	0.103725	3.0275	0.00246586	0.0367423	Coding
Utrn	591.851	-0.171849	0.0568293	-3.02395	0.00249499	0.0370815	Coding
Gm45206	60.3662	0.483016	0.15973	3.02395	0.00249496	0.0370815	Predicted
Trim21	131.165	0.395756	0.130882	3.02377	0.00249644	0.0370815	Coding
Rps2-ps10	713.537	-0.176898	0.0585748	-3.02004	0.00252741	0.0375022	Ribosomal
Hist1h2be	19.5574	-0.800034	0.265149	-3.0173	0.00255033	0.0378029	Coding
Lum	662.237	1.6843	0.558687	3.01474	0.002572	0.0380843	Coding
Rdh11	639.147	-0.270672	0.089831	-3.01312	0.00258577	0.0382485	Coding
Phlpp1	168.859	-0.338243	0.112269	-3.01277	0.00258872	0.0382522	Coding
Fyttd1	1462.81	-0.148888	0.049428	-3.01221	0.00259349	0.0382829	Coding
Il18	664.17	0.167269	0.0555396	3.0117	0.00259789	0.0382913	Coding
Prpf4b	2133.49	-0.147476	0.0489706	-3.01152	0.00259944	0.0382913	Coding
Psmg4	3787.1	0.301647	0.10031	3.00715	0.00263712	0.0388061	Coding
Ndufs7	3933.79	0.183383	0.0609944	3.00655	0.0026423	0.038842	Coding
Rpl21-ps4	10.979	1.0395	0.346032	3.00407	0.00266396	0.03912	Ribosomal
Pik3ca	475.473	-0.192199	0.064028	-3.00179	0.00268398	0.0392518	Coding
Cep44	248.727	-0.241195	0.0803487	-3.00185	0.0026834	0.0392518	Coding
Mrps18a	1565.15	0.190611	0.0634817	3.00261	0.00267676	0.0392518	Coding
Gng12	2629.14	0.103128	0.0343489	3.00236	0.00267892	0.0392518	Coding
Hmbox1	231.992	-0.291008	0.0969881	-3.00045	0.00269581	0.0393843	Coding
Trmt112-ps2	18.1038	0.815534	0.271948	2.99886	0.00270995	0.0395502	Noncoding
Fads1	1033.13	-0.242833	0.0809946	-2.99814	0.00271634	0.0396028	Coding
Gm10123	96.9013	0.374001	0.124763	2.99769	0.00272031	0.03962	Predicted
AC154767.3	8.11532	1.28897	0.430073	2.99709	0.00272573	0.0396584	Noncoding
Slc27a4	130.408	-0.35251	0.117639	-2.99653	0.0027307	0.0396901	Coding
Usp47	922.358	-0.170429	0.0568844	-2.99606	0.0027349	0.0397105	Coding
2610524H06Rik	601.445	0.23902	0.079812	2.99479	0.00274631	0.0398354	Coding
Car12	558.002	-0.30339	0.101352	-2.99342	0.00275872	0.0399669	Coding
Bnip3	5450.95	-0.411595	0.137512	-2.99317	0.00276099	0.0399669	Coding
Klc1	883.15	-0.141306	0.0472372	-2.99141	0.00277695	0.0399943	Coding
Yes1	278.718	-0.265658	0.0887966	-2.99176	0.0027737	0.0399943	Coding
Rc3h2	588.256	-0.168886	0.0564542	-2.99156	0.00277552	0.0399943	Coding
Ido2	14.8774	1.53427	0.512719	2.99243	0.00276769	0.0399943	Coding
Amhr2	105.323	-0.465219	0.155494	-2.99188	0.00277265	0.0399943	Coding
Ubqln1	1503.28	-0.132433	0.0442776	-2.99096	0.00278099	0.0400119	Coding
Gm5518	8.46877	1.20233	0.402554	2.98675	0.00281962	0.0405266	Predicted
Rhoq	996.295	-0.211722	0.0709494	-2.98412	0.00284395	0.0408351	Coding
Cxcr6	33.5596	-1.00827	0.337971	-2.98332	0.00285144	0.0409013	Coding
Lpp	1927.2	-0.161671	0.0542289	-2.98128	0.00287049	0.041133	Coding
Eml1	481.811	-0.246126	0.0826452	-2.9781	0.00290042	0.0415202	Coding
Shroom3	296.7	0.391792	0.13161	2.97692	0.00291156	0.0416377	Coding
Basp1	2261.4	-0.267324	0.0898175	-2.9763	0.00291749	0.0416805	Coding
Socs3	1518.65	0.722987	0.243026	2.97494	0.00293044	0.0418235	Coding
Scrn1	372.781	0.23927	0.0804558	2.97393	0.00294013	0.0418994	Coding
Rai1	176.399	-0.262641	0.0883338	-2.97328	0.00294632	0.0418994	Coding
Rmdn3	409.28	0.283601	0.0953831	2.97329	0.00294627	0.0418994	Coding
Huwe1	1488.99	-0.128265	0.0431411	-2.97316	0.00294755	0.0418994	Coding
Krt18	1618.31	-0.429458	0.14449	-2.97222	0.00295654	0.0419852	Coding
AC122235.1	25.6216	0.660839	0.22254	2.96953	0.00298255	0.0422751	Noncoding
Rsad2	1131.35	0.79507	0.267746	2.96949	0.0029829	0.0422751	Coding
Ice1	509.98	-0.185363	0.0624711	-2.96717	0.00300552	0.0425533	Coding
Nfe2l2	1234.14	0.145798	0.0491588	2.96585	0.00301845	0.0426937	Coding
Zfp945	110.282	0.322728	0.108834	2.96531	0.0030238	0.0427269	Coding
CT010506.1	203.493	0.283396	0.0956047	2.96425	0.00303421	0.0428314	Noncoding
Gm38358	89.1136	0.416137	0.140595	2.95982	0.00307815	0.0434086	Predicted
Gsta1	65.3469	1.7844	0.602941	2.95949	0.00308147	0.0434124	Coding
Msrb3	371.33	-0.304864	0.103045	-2.95855	0.00309086	0.0434147	Coding
Gm7287	28.1768	0.737302	0.249172	2.95901	0.0030863	0.0434147	Predicted
Kdm4b	197.826	-0.336158	0.113634	-2.95826	0.00309385	0.0434147	Coding
Cdc42bpa	479.361	-0.238757	0.0807047	-2.95841	0.00309234	0.0434147	Coding
Ifngr2	388.173	-0.326454	0.110368	-2.95788	0.0030976	0.0434244	Coding
Plekhg3	338.442	-0.236702	0.0800613	-2.95651	0.00311139	0.0435748	Coding
Gm10020	8.50882	1.22212	0.413553	2.95516	0.00312509	0.0437235	Predicted
Gm42820	91.6593	-0.380816	0.128919	-2.95391	0.00313771	0.043857	Predicted
Gm5786	95.2304	0.379235	0.128406	2.95342	0.00314275	0.0438843	Predicted
Apobec3	1019.25	0.239988	0.0813372	2.95053	0.00317225	0.0442527	Coding
B4galt1	814.777	-0.339563	0.115215	-2.94722	0.00320645	0.0445986	Coding
Tmeff1	332.013	-0.365369	0.123965	-2.94735	0.00320513	0.0445986	Coding
Gm20417	164.741	-0.486231	0.164973	-2.94734	0.00320518	0.0445986	Predicted
Lrmda	127.588	0.323412	0.10978	2.946	0.00321909	0.0447306	Coding
Relt	77.8601	-0.434464	0.147545	-2.94461	0.00323358	0.044888	Coding
Wdr6	377.683	-0.220652	0.0749484	-2.94405	0.00323949	0.0449262	Coding
Zdhhc16	699.714	-0.17639	0.0599291	-2.94332	0.00324714	0.0449884	Coding
4833407H14Rik	6.94559	1.27567	0.43388	2.94014	0.00328069	0.0454089	Noncoding
Ap2b1	795.518	-0.178267	0.0606631	-2.93865	0.00329648	0.0455831	Coding
Fam160b1	530.32	-0.175815	0.0598482	-2.93769	0.00330665	0.0456793	Coding
Zranb3	29.6051	-0.608907	0.207311	-2.93717	0.00331222	0.0457119	Coding
Rnf214	298.701	-0.219853	0.0748828	-2.93596	0.00332513	0.0458455	Coding
Agpat5	1338.37	-0.193154	0.0657964	-2.93563	0.00332876	0.0458511	Coding
Slfn2	331.591	1.41744	0.482909	2.93521	0.00333321	0.045868	Coding
Ddx18	1288.16	0.183904	0.0627249	2.93191	0.00336887	0.0463138	Coding
Ppp6r1	361.706	-0.21553	0.0735647	-2.9298	0.00339183	0.0465844	Coding
Psmb9	9011.99	0.292858	0.100084	2.92612	0.00343223	0.0470599	Coding
Aldoc	871.512	-0.552157	0.188705	-2.92604	0.00343307	0.0470599	Coding
Dtd1	828.726	0.224582	0.0768726	2.92149	0.00348367	0.0477074	Coding
Ccl2	558.61	1.40491	0.481041	2.92056	0.00349403	0.0478033	Coding
D8Ertd738e	5631.45	0.0819134	0.0280741	2.91776	0.00352557	0.0481421	Coding
St6galnac4	676.195	0.401828	0.137711	2.91792	0.00352379	0.0481421	Coding
Nfkbib	862.822	0.209827	0.071967	2.9156	0.00355007	0.0484302	Coding
Txndc5	2449.75	-0.158988	0.0545363	-2.91527	0.00355384	0.0484351	Coding
Phex	168.808	0.467624	0.160578	2.91212	0.00358983	0.0488788	Coding
Tspan11	82.0488	0.457801	0.157234	2.91159	0.00359592	0.0489149	Coding
Bsg	19830.3	-0.201568	0.0692591	-2.91034	0.00361035	0.0490642	Coding
Gm17511	72.0787	0.431467	0.148277	2.90987	0.00361577	0.0490909	Predicted
Trim16	328.845	0.235499	0.080967	2.90859	0.00363068	0.0491525	Coding
Rpl19-ps1	90.6466	0.383223	0.13174	2.90893	0.00362665	0.0491525	Ribosomal
Dnm3os	291.774	0.281154	0.0966632	2.9086	0.00363052	0.0491525	Noncoding
Zfp472	77.0938	0.417504	0.143629	2.90683	0.00365113	0.0493823	Coding
Rpl18a-ps1	35.5165	0.55638	0.191454	2.90608	0.00365991	0.049454	Ribosomal
Gm7600	175.808	0.316196	0.108912	2.90322	0.00369343	0.0498596	Predicted
Mir155hg	253.057	0.420782	0.145057	2.90081	0.00372194	0.0501967	Noncoding
Wisp2	302.47	0.871799	0.300745	2.89879	0.00374602	0.0504258	Coding
Gm13611	1797.11	0.151991	0.0524295	2.89896	0.00374408	0.0504258	Predicted
Insig1	1585.66	-0.517494	0.178635	-2.89693	0.00376833	0.0506303	Coding
Gm8129	31.6277	0.562209	0.194056	2.89715	0.00376575	0.0506303	Predicted
Sgms1	335.213	-0.224033	0.0773849	-2.89504	0.00379107	0.0507519	Coding
Gm6155	21.0128	0.757031	0.261497	2.89499	0.00379166	0.0507519	Predicted
Gm4335	25.5427	0.665863	0.229967	2.89548	0.00378585	0.0507519	Predicted
Usp9x	669.421	-0.17836	0.0616004	-2.89544	0.00378633	0.0507519	Coding
Fam110c	132.949	-0.310538	0.107379	-2.89197	0.00382833	0.0511853	Coding
Arid4b	1295.88	-0.210367	0.0727479	-2.89173	0.00383125	0.0511853	Coding
Jup	593.252	-0.406444	0.140582	-2.89114	0.00383844	0.0512333	Coding
Tma7-ps	9.50015	1.05403	0.36481	2.88925	0.00386163	0.0514944	Noncoding
Khsrp	767.28	-0.157466	0.0545161	-2.88843	0.00387169	0.0515803	Coding
Kifc3	354.398	-0.212941	0.073744	-2.88756	0.00388237	0.0516257	Coding
Clpp	2393.82	0.146363	0.0506845	2.88772	0.00388043	0.0516257	Coding
Npepps	1006.53	-0.176298	0.0610661	-2.88701	0.00388925	0.0516688	Coding
Dnajc19-ps	25.1792	0.65726	0.227704	2.88647	0.0038959	0.0517088	Noncoding
Enc1	986.296	0.293132	0.101586	2.88556	0.00390718	0.0518103	Coding
Mrpl1	542.372	0.216809	0.0751575	2.88473	0.00391743	0.0518978	Coding
Cnn2	7129.73	-0.14074	0.0487938	-2.88439	0.00392176	0.0519068	Coding
Rpl27	9408.25	0.111632	0.0387183	2.88319	0.00393668	0.0520074	Ribosomal
Slc25a1	981.394	-0.182033	0.0631348	-2.88324	0.00393604	0.0520074	Coding
Dock1	282.103	-0.22647	0.0786074	-2.88103	0.00396382	0.0523172	Coding
Ndufaf8	1116.82	0.146248	0.0507695	2.88063	0.0039688	0.0523344	Coding
Parp10	482.502	0.305616	0.106167	2.87862	0.00399414	0.0526197	Coding
Ndufa5	5001.67	0.171991	0.0597842	2.87686	0.00401654	0.0528424	Coding
Trim33	762.529	-0.170988	0.0594388	-2.87671	0.00401848	0.0528424	Coding
Capza2	7571.33	0.143545	0.0499098	2.87609	0.00402637	0.0528973	Coding
Ccdc59	2025.63	0.11057	0.0384637	2.87467	0.00404454	0.0530703	Coding
Pdxk	490.712	0.196239	0.0682694	2.87447	0.00404701	0.0530703	Coding
Leng8	365.777	-0.239963	0.0835487	-2.87213	0.0040771	0.0534035	Coding
Atxn2l	806.821	-0.199302	0.0693968	-2.87192	0.00407993	0.0534035	Coding
Mmp19	68.3529	0.551036	0.191936	2.87094	0.00409252	0.0535191	Coding
Rab10os	280.489	0.227023	0.0790878	2.87052	0.00409803	0.0535418	Noncoding
Foxo3	358.368	-0.228045	0.0794873	-2.86894	0.00411845	0.0537556	Coding
Amotl2	783.216	-0.162555	0.0566656	-2.86867	0.00412196	0.0537556	Coding
Gm16378	38.2579	0.540684	0.188586	2.86703	0.00414341	0.0539858	Predicted
Dubr	311.375	-0.305208	0.106497	-2.86589	0.00415836	0.0540856	Noncoding
Cox5a	13902.9	0.200926	0.0701196	2.86547	0.00416388	0.0540856	Coding
Gm42573	11.5333	1.01023	0.352611	2.865	0.00417009	0.0540856	Predicted
Gm6266	58.2365	0.444549	0.155123	2.86578	0.00415982	0.0540856	Predicted
Cul4a	735.806	-0.158296	0.0552497	-2.8651	0.00416872	0.0540856	Coding
Capn5	26.5233	0.783353	0.273554	2.86361	0.00418837	0.0542345	Coding
Pfkp	1897.03	-0.234264	0.0818088	-2.86355	0.0041892	0.0542345	Coding
Phf11b	133.682	0.541723	0.189266	2.86222	0.00420681	0.0544129	Coding
1110004E09Rik	713.988	0.352266	0.12313	2.86092	0.00422414	0.0545723	Coding
Atxn1	846.37	-0.207155	0.0724136	-2.86072	0.00422681	0.0545723	Coding
Denr	5086.8	-0.161034	0.0563008	-2.86025	0.00423306	0.0546035	Coding
Emilin2	63.3335	0.434708	0.152	2.85992	0.00423752	0.0546114	Coding
Gm6415	37.7285	0.563279	0.196986	2.85949	0.00424317	0.0546346	Predicted
Hivep2	589.179	-0.18913	0.0662318	-2.85558	0.00429585	0.0552629	Coding
Rusc2	103.763	-0.381814	0.133782	-2.854	0.00431729	0.0554885	Coding
Kdelr2	3606.96	-0.0970836	0.0340219	-2.85357	0.00432315	0.0555136	Coding
Zswim6	427.855	-0.287752	0.100924	-2.85118	0.00435578	0.0558821	Noncoding
Gm38302	12.5486	-0.913014	0.320325	-2.85027	0.00436816	0.0559904	Predicted
Ufsp2	1163.22	-0.12415	0.0435826	-2.84861	0.004391	0.0561819	Coding
Fnip2	261.713	0.259286	0.0910212	2.84864	0.00439072	0.0561819	Coding
Gm14494	29.4954	0.637732	0.223961	2.84751	0.00440625	0.0563263	Predicted
2810408I11Rik	156.039	0.400213	0.140594	2.84658	0.0044191	0.0564399	Noncoding
Prpf38a	1571.57	0.148155	0.0520618	2.84575	0.00443069	0.056537	Coding
Gng2	96.022	-0.854027	0.300152	-2.84531	0.00443678	0.056564	Coding
Ctnnd1	740.671	-0.180811	0.0635737	-2.84412	0.00445338	0.056674	Coding
Oas2	87.6992	0.570127	0.200447	2.84427	0.00445127	0.056674	Coding
Suco	294.93	-0.224366	0.0789085	-2.84337	0.00446389	0.0567062	Coding
Strbp	328.28	-0.23913	0.084098	-2.84346	0.0044626	0.0567062	Coding
Ubr3	285.779	-0.20403	0.0717685	-2.84289	0.0044706	0.0567406	Coding
Gm4468	87.7077	0.365495	0.128625	2.84156	0.00448939	0.0569284	Predicted
Gm4705	23.6938	0.649948	0.228814	2.8405	0.00450425	0.0570151	Predicted
Rpl19-ps9	28.3769	0.621025	0.218614	2.84074	0.0045009	0.0570151	Ribosomal
Bgn	1011.71	0.91392	0.321834	2.83972	0.0045153	0.0570974	Coding
Dcbld2	177.056	-0.318095	0.112026	-2.83947	0.00451878	0.0570974	Coding
Gm9493	131.256	0.29896	0.105362	2.83745	0.00454754	0.0573749	Predicted
Pacs1	320.808	-0.216557	0.0763233	-2.83736	0.00454882	0.0573749	Coding
Pole4	1890.14	0.131943	0.0465097	2.83689	0.00455551	0.0574084	Coding
Ncoa6	274.559	-0.212497	0.0749294	-2.83596	0.00456879	0.0575247	Coding
Rnd3	1100.79	0.227746	0.0803221	2.8354	0.00457678	0.0575742	Coding
AC155256.1	147.06	0.318236	0.112295	2.83392	0.00459802	0.0577393	Noncoding
Zdhhc8	333.738	-0.206652	0.0729187	-2.83401	0.00459684	0.0577393	Coding
Mrps34	1770.6	0.311261	0.109846	2.83362	0.00460244	0.0577437	Coding
Loxl2	486.171	-0.280137	0.0988963	-2.83264	0.00461657	0.057819	Coding
Nudt4	6372.24	-0.249632	0.0881254	-2.83269	0.00461586	0.057819	Coding
Cbfb	1387.49	-0.187251	0.0661469	-2.83084	0.00464267	0.0579264	Coding
Zfp296	136.785	0.283999	0.10033	2.83064	0.00464552	0.0579264	Coding
Pdk1	760.538	-0.361334	0.127637	-2.83095	0.00464103	0.0579264	Coding
Fam210b	392.194	-0.402289	0.142088	-2.83126	0.00463652	0.0579264	Coding
Cacnb3	575.843	-0.35111	0.124025	-2.83096	0.00464086	0.0579264	Coding
Ap3b1	765.652	-0.147738	0.0521998	-2.83023	0.00465142	0.0579491	Coding
Snx25	193.912	-0.241916	0.0854943	-2.82961	0.00466044	0.0579785	Coding
Jdp2	653.528	-0.208148	0.0735632	-2.82951	0.00466194	0.0579785	Coding
Rassf3	253.374	-0.234275	0.0828613	-2.82731	0.00469409	0.0583208	Coding
Gm12726	30.963	0.598597	0.211738	2.82707	0.00469767	0.0583208	Predicted
Tmem170b	256.453	-0.310496	0.109916	-2.82483	0.00473051	0.0586773	Coding
Hspb8	1622.92	0.231057	0.0818099	2.82432	0.00473808	0.05872	Coding
Ccl17	133.132	0.377318	0.133662	2.82293	0.00475872	0.0589244	Coding
Tmem19	256.388	-0.313638	0.111164	-2.82141	0.00478128	0.0591522	Coding
Siva1	3904.7	0.203891	0.0723635	2.8176	0.00483837	0.059775	Coding
Vps13d	151.193	-0.300838	0.106775	-2.81749	0.00484003	0.059775	Coding
Gm26735	246.699	-0.22136	0.0785943	-2.81649	0.00485518	0.05991	Predicted
C77080	562.36	-0.169055	0.060044	-2.81553	0.00486974	0.0600376	Coding
Ocel1	589.048	0.204042	0.0724966	2.81451	0.00488517	0.0601757	Coding
Gtf2i	999.112	-0.154291	0.0548458	-2.81318	0.00490536	0.060372	Coding
Gm4285	54.7651	0.463947	0.16512	2.80976	0.00495788	0.0609656	Predicted
Akr1c14	75.191	0.563958	0.200755	2.80919	0.00496664	0.0610205	Coding
Gm8927	19.124	0.808349	0.288135	2.80545	0.00502459	0.0616348	Predicted
Gdf11	199.016	-0.279207	0.0995247	-2.80541	0.00502531	0.0616348	Coding
Gm3671	8.06301	1.17482	0.419143	2.80291	0.00506444	0.0620173	Predicted
Dennd5b	114.269	-0.387122	0.138117	-2.80286	0.00506522	0.0620173	Coding
Gm11353	74.1563	0.382753	0.136573	2.80256	0.00506989	0.0620211	Predicted
Aimp2	1622.51	-0.135093	0.0482132	-2.802	0.00507872	0.0620756	Coding
Tab2	933.382	-0.16706	0.0596637	-2.80002	0.00510993	0.0624035	Coding
Cxcl3	228.354	0.963184	0.344091	2.79921	0.00512274	0.0625062	Coding
Hnrnpul2	1343.67	-0.136292	0.0487063	-2.79824	0.00513812	0.0626402	Coding
AC120394.3	6.86226	1.25509	0.448624	2.79764	0.00514773	0.0627035	Noncoding
Gm37531	64.0383	-0.47694	0.170535	-2.79673	0.00516227	0.0628268	Predicted
Gm5662	29.8533	0.792222	0.283521	2.79423	0.00520241	0.0632611	Predicted
Tgfa	86.7268	-0.474122	0.169722	-2.79352	0.00521381	0.0633456	Coding
S100a7a	181.77	0.649047	0.232412	2.79265	0.00522784	0.0634618	Coding
Col4a3bp	568.245	-0.179568	0.0643227	-2.79167	0.00524367	0.0635996	Coding
Tubg1	537.728	-0.192115	0.0688653	-2.78973	0.00527527	0.0639284	Coding
Osbpl8	257.249	-0.264893	0.0950328	-2.78739	0.00531353	0.0643372	Coding
Antxr2	237.939	-0.332369	0.119385	-2.78401	0.00536919	0.0648567	Coding
Rpl7-ps7	1307.05	-0.126882	0.0455763	-2.78395	0.00537013	0.0648567	Ribosomal
Ndufb2	2784.72	0.118437	0.0425384	2.78422	0.00536558	0.0648567	Coding
Calu	6641.09	-0.183113	0.065795	-2.78309	0.00538442	0.0649741	Coding
Rpsa-ps4	34.2949	0.551301	0.198244	2.78093	0.00542034	0.065352	Noncoding
Ndufb6	2975.7	0.0934969	0.0336411	2.77924	0.00544857	0.0655812	Coding
2310030G06Rik	347.988	-0.207497	0.0746551	-2.7794	0.0054459	0.0655812	Coding
Cxcl16	785.071	0.278584	0.100363	2.77576	0.00550734	0.0662325	Coding
mt-Nd1	54949.8	0.184435	0.0664578	2.77523	0.00551631	0.0662843	Mitochondrial
Hsph1	3207.08	0.181783	0.0655252	2.77424	0.005533	0.0664288	Coding
Mocos	163.359	0.281383	0.101487	2.7726	0.00556102	0.0667088	Coding
Proser2	147.825	-0.429538	0.154957	-2.77198	0.00557169	0.0667804	Coding
Rps11-ps3	20.6438	0.715897	0.258359	2.77094	0.00558949	0.066853	Ribosomal
Sh3kbp1	1846.69	-0.164923	0.0595218	-2.7708	0.00559186	0.066853	Coding
Polr2i	1302.91	0.108991	0.0393286	2.7713	0.00558325	0.066853	Coding
Dysf	173.257	-0.276908	0.100037	-2.76805	0.00563933	0.067364	Coding
Zdhhc5	320.09	-0.226081	0.0817206	-2.76651	0.00566601	0.0676258	Coding
Gm13502	16.2233	-0.801196	0.289652	-2.76606	0.00567377	0.0676617	Predicted
Lancl3	88.0871	-0.358751	0.12974	-2.76516	0.00568952	0.0677926	Coding
Hspa5	13680.1	0.174949	0.0632905	2.76423	0.00570571	0.0679285	Coding
Celf2	428.845	-0.249256	0.0902105	-2.76305	0.00572645	0.0681185	Coding
Il1rn	47.8688	0.483269	0.175059	2.76061	0.00576932	0.068571	Coding
Mxi1	1582.66	-0.381619	0.138309	-2.75917	0.00579479	0.0688162	Coding
Saysd1	458.34	0.196053	0.0711188	2.75669	0.00583896	0.0692167	Coding
Epor	32.1862	-0.570198	0.206848	-2.75661	0.00584045	0.0692167	Coding
Gm13498	12.1691	0.919917	0.333732	2.75646	0.00584313	0.0692167	Predicted
Ppard	282.703	-0.255112	0.0925636	-2.75607	0.00585005	0.0692411	Coding
Myo1b	772.817	-0.157012	0.0570072	-2.75425	0.00588275	0.0695701	Coding
Tnfsf13b	56.5686	0.443077	0.160936	2.75312	0.00590297	0.0696354	Coding
Gm6863	769.791	0.179549	0.0652154	2.75317	0.00590203	0.0696354	Predicted
Mmp2	1455.06	0.720219	0.261552	2.75364	0.00589372	0.0696354	Coding
Klf7	1534.74	0.147404	0.053558	2.75223	0.00591917	0.0697687	Coding
Zfyve1	131.093	-0.334247	0.121466	-2.75178	0.0059273	0.0698066	Coding
Mlkl	1857.9	0.289136	0.105084	2.75147	0.0059329	0.0698147	Coding
Ints7	174.287	-0.248244	0.0902989	-2.74914	0.00597518	0.0700013	Coding
Ugp2	1203.4	-0.177905	0.0647069	-2.74939	0.00597059	0.0700013	Coding
Gm12013	1189.29	-0.155027	0.0563976	-2.74882	0.00598104	0.0700013	Predicted
Nol8	631.289	0.275591	0.100262	2.7487	0.00598323	0.0700013	Coding
Atxn2	636.062	-0.184475	0.0670926	-2.74956	0.0059675	0.0700013	Coding
Sbk1	74.6959	-0.443025	0.161086	-2.75024	0.00595521	0.0700013	Coding
Uqcrq	8013.01	0.220258	0.0800938	2.75	0.0059595	0.0700013	Coding
Fbxl20	194.156	-0.294388	0.107154	-2.74734	0.00600799	0.0702333	Coding
Ranbp10	270.416	-0.212013	0.0771818	-2.74693	0.00601558	0.0702641	Coding
Spcs2-ps	23.3137	0.785346	0.285974	2.74621	0.00602883	0.0703611	Noncoding
Gm6285	26.6425	0.622297	0.22673	2.74466	0.00605732	0.0706356	Predicted
Boc	389.918	0.184808	0.0674127	2.74144	0.00611697	0.0712727	Coding
Heatr5a	243.723	-0.246774	0.0900586	-2.74015	0.00614104	0.0714946	Coding
Mst1	105.08	0.422113	0.154066	2.73982	0.0061472	0.0715077	Coding
Mtmr3	247.08	-0.219412	0.0801108	-2.73886	0.00616532	0.0716599	Coding
Gm43072	24.3113	-0.650096	0.237429	-2.73806	0.0061802	0.0717742	Predicted
Pigo	41.5517	-0.497914	0.181903	-2.73726	0.00619542	0.0718336	Coding
Tmtc3	216.385	-0.268092	0.097937	-2.73739	0.00619282	0.0718336	Coding
Ercc8	58.0279	0.415856	0.151971	2.73642	0.00621125	0.0719584	Coding
Sap30	1910.38	-0.209048	0.0764522	-2.73436	0.00625016	0.0723502	Coding
Meaf6	912.485	0.143497	0.0524917	2.73371	0.00626247	0.0723748	Coding
Jmy	342.85	-0.230949	0.0844747	-2.73394	0.00625808	0.0723748	Coding
Map4k5	473.488	-0.176015	0.0644318	-2.7318	0.00629898	0.0727376	Coding
Map4	852.276	-0.187574	0.0686811	-2.73109	0.00631253	0.072835	Coding
Gm42727	86.0578	-0.335155	0.122766	-2.73002	0.00633299	0.0730117	Predicted
Dyrk1a	257.313	-0.222144	0.081384	-2.72957	0.00634163	0.0730521	Coding
Smim20	711.202	0.197387	0.0723688	2.72752	0.00638133	0.0734498	Coding
Nfe2l3	16.7483	-0.752632	0.276088	-2.72606	0.00640952	0.0737146	Coding
Prrc2b	820.784	-0.153894	0.0564941	-2.72407	0.00644826	0.0738011	Coding
Bet1l	343.084	0.210272	0.0771747	2.72462	0.00643747	0.0738011	Coding
Sgpl1	770.555	-0.146401	0.0537579	-2.72335	0.00646244	0.0738011	Coding
Cdc42bpb	527.135	-0.174393	0.06403	-2.72361	0.00645726	0.0738011	Coding
AC129329.1	21.9899	0.744687	0.273343	2.72437	0.00644242	0.0738011	Noncoding
Utp14b	510.673	-0.379371	0.139267	-2.72406	0.00644846	0.0738011	Coding
Tgfb2	167.01	-0.593062	0.217652	-2.72481	0.00643381	0.0738011	Coding
Aacs	653.092	-0.24946	0.0915418	-2.72509	0.00642832	0.0738011	Coding
Map2k6	105.138	-0.359898	0.132156	-2.72328	0.00646376	0.0738011	Coding
Litaf	1842.81	0.129311	0.0475127	2.72161	0.00649652	0.0739968	Coding
Mapk1ip1l	828.591	-0.139602	0.0512907	-2.72178	0.00649312	0.0739968	Coding
Mapk11	170.564	-0.256297	0.0941659	-2.72176	0.0064935	0.0739968	Coding
Eif3f	9237.71	0.098962	0.0363676	2.72116	0.00650533	0.0740379	Coding
Dynap	7031.97	-0.26076	0.0958578	-2.72028	0.00652259	0.0741749	Coding
Chpt1	1081.51	0.182663	0.0671937	2.71845	0.00655885	0.0745277	Coding
Ccdc6	496.232	-0.202006	0.0743252	-2.71787	0.00657044	0.0745997	Coding
Gm11964	47.6242	0.435695	0.160376	2.71671	0.00659351	0.0748019	Predicted
Zkscan1	368.156	-0.173519	0.0638933	-2.71575	0.00661249	0.0749574	Coding
Golph3l	162.754	-0.248424	0.0915027	-2.71493	0.00662891	0.0750704	Coding
Gm15920	1427.84	0.196654	0.0724398	2.71473	0.00663302	0.0750704	Predicted
Ilk	2263.86	-0.127494	0.046978	-2.7139	0.00664955	0.0751976	Coding
Ms4a4d	128.526	0.546332	0.201355	2.71328	0.00666216	0.0752575	Coding
Gm9320	156.231	0.294475	0.108538	2.71311	0.00666544	0.0752575	Predicted
Csrp1	1256.77	-0.241853	0.089163	-2.71248	0.0066782	0.0753417	Coding
Selenop	25.5156	1.03746	0.382705	2.71086	0.00671089	0.0756028	Coding
Nmi	1777.28	0.345869	0.127589	2.71081	0.00671197	0.0756028	Coding
Spidr	276.257	-0.205966	0.076016	-2.7095	0.00673838	0.0758402	Coding
Rnf145	622.491	-0.164904	0.0608823	-2.70857	0.0067574	0.0759171	Coding
Stt3b	996.569	-0.13201	0.0487484	-2.70799	0.00676926	0.0759171	Coding
Plekho1	802.193	-0.214124	0.079075	-2.70786	0.00677193	0.0759171	Coding
Tm7sf2	118.478	-0.50318	0.185783	-2.70843	0.00676025	0.0759171	Coding
Plekha1	205.485	-0.280701	0.103654	-2.70806	0.0067677	0.0759171	Coding
Hnrnph1	1741.82	-0.139364	0.0515183	-2.70513	0.00682767	0.0763014	Coding
Efna4	281.694	-0.241887	0.0894141	-2.70524	0.00682555	0.0763014	Coding
Gm15795	17.8566	0.715117	0.264295	2.70575	0.00681493	0.0763014	Predicted
Slc16a3	3476.96	-0.242691	0.0897033	-2.70548	0.00682054	0.0763014	Coding
Atp11b	287.874	-0.197187	0.072971	-2.70227	0.00688686	0.0769024	Coding
Mvk	785.831	-0.248956	0.0921784	-2.7008	0.00691723	0.0771808	Coding
Wwp2	540.373	-0.182321	0.0675227	-2.70014	0.00693099	0.0772738	Coding
Tdpx-ps1	104.043	0.387914	0.143828	2.69707	0.00699518	0.0778137	Noncoding
Numb	225.569	-0.277108	0.102745	-2.69704	0.00699585	0.0778137	Coding
Rreb1	305.115	-0.200265	0.0742431	-2.69743	0.00698777	0.0778137	Coding
Cystm1	495.352	-0.338245	0.125436	-2.69656	0.00700602	0.0778659	Coding
Fbxo6	815.214	0.136139	0.0504954	2.69607	0.00701619	0.0779181	Coding
Acpp	1152.85	-0.372138	0.138049	-2.69569	0.00702439	0.0779482	Coding
Dhx32	230.132	-0.238428	0.0884657	-2.69515	0.00703572	0.078013	Coding
Abhd16a	1050.06	0.194162	0.0721361	2.69161	0.00711086	0.0787794	Coding
Mrpl51	3633.36	0.123797	0.0459977	2.69137	0.00711592	0.0787794	Coding
Pcnx	153.592	-0.261544	0.0972075	-2.69057	0.00713298	0.0789004	Coding
Creb3l2	651.206	-0.263361	0.0978913	-2.69034	0.00713795	0.0789004	Coding
Hacd1	548.039	-0.239998	0.0892382	-2.68941	0.00715781	0.0789643	Coding
Clstn1	413.019	-0.182123	0.0677122	-2.68967	0.00715225	0.0789643	Coding
Klf4	2572.51	0.245093	0.0911369	2.68928	0.00716063	0.0789643	Coding
Dstn	7265.03	-0.145947	0.0542751	-2.68903	0.00716595	0.0789643	Coding
Hebp2	349.299	-0.23026	0.085649	-2.68841	0.00717922	0.0790493	Coding
Rpl30-ps3	15.2006	0.824434	0.306894	2.68638	0.00722311	0.0793843	Ribosomal
Kat2b	329.67	0.224603	0.0836128	2.68623	0.0072264	0.0793843	Coding
Nono	3960.93	-0.106311	0.0395747	-2.68635	0.0072237	0.0793843	Coding
Dcxr	280.261	0.281888	0.104992	2.68486	0.00725593	0.0796471	Coding
Smurf2	473.267	-0.202153	0.0753504	-2.68284	0.00730009	0.0799563	Coding
Cacybp	6528.65	0.252543	0.0941432	2.68254	0.00730659	0.0799563	Coding
Eaf2	45.0803	0.483017	0.180059	2.68255	0.0073064	0.0799563	Coding
Pik3c2a	383.634	-0.229245	0.0854562	-2.6826	0.0073052	0.0799563	Coding
Gm4943	23.9443	0.641756	0.239325	2.68153	0.00732869	0.0801365	Predicted
Ccdc71l	349.151	0.193222	0.0720822	2.68058	0.00734946	0.0803017	Coding
Rchy1	572.4	0.149686	0.055852	2.68005	0.00736111	0.0803673	Coding
Ndrg1	3298.74	-0.291004	0.108595	-2.67973	0.00736814	0.0803823	Coding
Nap1l4	1484.46	-0.14946	0.0557901	-2.67896	0.00738509	0.0805054	Coding
Fzd2	442.952	-0.305527	0.114092	-2.67789	0.00740873	0.0807013	Coding
Gm12760	8.22562	1.25018	0.466978	2.67716	0.00742489	0.0807684	Predicted
AC158239.1	6.34365	-1.61089	0.601731	-2.6771	0.00742626	0.0807684	Noncoding
Psmb8	22710.6	0.240451	0.0898865	2.67505	0.00747187	0.0812023	Coding
Dynlt1f	588.422	-0.223977	0.0837449	-2.67451	0.00748383	0.0812702	Coding
Trib1	912.905	0.345097	0.129094	2.67322	0.00751271	0.0815215	Coding
Sntb1	626.95	-0.193289	0.0723424	-2.67186	0.00754325	0.0816659	Coding
Dnajc10	953.652	-0.175539	0.0656938	-2.67208	0.00753817	0.0816659	Coding
Uqcc3	873.529	0.18413	0.0689092	2.67206	0.00753864	0.0816659	Coding
Csf1r	11.7323	-0.930028	0.348116	-2.6716	0.007549	0.081666	Coding
Slc41a1	260.729	-0.268017	0.100333	-2.67128	0.00755632	0.081683	Coding
Gm8643	8.56996	1.08421	0.405935	2.67091	0.00756467	0.0817111	Predicted
Mat2a	2628.57	0.209549	0.078464	2.67064	0.00757064	0.0817134	Coding
Slc25a24	1699.61	-0.12141	0.0454856	-2.6692	0.00760319	0.0819161	Coding
Lynx1	56.0626	0.43294	0.162208	2.66905	0.0076067	0.0819161	Coding
Fanca	160.302	0.348611	0.130591	2.66948	0.0075968	0.0819161	Coding
Atp5e	12043.8	0.0977592	0.0366363	2.66837	0.00762197	0.0820184	Coding
Kctd5	424.627	-0.176128	0.0660418	-2.66691	0.00765513	0.082313	Coding
Hspg2	676.913	-0.222133	0.0833164	-2.66613	0.00767297	0.0823801	Coding
Micall1	436.337	-0.177567	0.0665991	-2.66621	0.00767113	0.0823801	Coding
Hmgcl	469.729	-0.248911	0.0933967	-2.66509	0.00769668	0.0825723	Coding
Gm12854	199.229	-0.23598	0.0885835	-2.66393	0.00772333	0.0827958	Predicted
Ctxn1	854.319	-0.301942	0.113423	-2.66209	0.00776583	0.0829955	Coding
Tob1	405.421	0.218241	0.08198	2.66212	0.00776507	0.0829955	Coding
Fam129b	983.394	-0.158065	0.0593816	-2.66185	0.00777116	0.0829955	Coding
Gm37108	91.5984	0.381865	0.143442	2.66216	0.00776403	0.0829955	Predicted
Mrpl30	3882.37	0.14394	0.0540689	2.66217	0.00776393	0.0829955	Coding
Sdf2l1	649.61	0.328745	0.123534	2.66117	0.00778708	0.0831031	Coding
Tmem97	967.714	-0.170445	0.0640562	-2.66086	0.00779415	0.0831162	Coding
Hspe1	16042.9	0.211716	0.0796132	2.65931	0.00783012	0.0833122	Coding
Abraxas2	379.736	0.178595	0.0671503	2.65963	0.00782259	0.0833122	Coding
Fetub	136.862	0.375934	0.141357	2.65946	0.00782651	0.0833122	Coding
Ephb4	270.962	-0.24077	0.0905666	-2.65849	0.0078492	0.0834528	Coding
Sap18	2487.82	-0.120116	0.0451936	-2.65781	0.00786499	0.0835582	Coding
Rbpj	3184.33	-0.203586	0.0766271	-2.65685	0.00788754	0.0837002	Ribosomal
Brd3	1091.19	-0.123862	0.0466219	-2.65674	0.00789013	0.0837002	Coding
Sacs	215.158	-0.259161	0.0976735	-2.65334	0.00797005	0.0844849	Coding
Wdr11	144.544	-0.269058	0.101414	-2.65308	0.00797615	0.0844865	Coding
Slc2a1	4777.35	-0.212337	0.0801245	-2.65009	0.00804712	0.0851114	Coding
Zfp236	180.827	-0.255776	0.0965086	-2.6503	0.00804214	0.0851114	Coding
2610037D02Rik	415.079	0.191918	0.072475	2.64806	0.00809555	0.08556	Noncoding
Pde4dip	195.871	-0.231553	0.0874584	-2.64757	0.00810717	0.0856192	Coding
Aqp1	1308.15	0.346356	0.130849	2.647	0.00812092	0.0856813	Coding
Aaed1	992.664	-0.265432	0.100283	-2.64683	0.0081251	0.0856813	Coding
Tmem158	366.9	0.21008	0.0793879	2.64624	0.00813913	0.0857656	Coding
Mrps15	2606.71	0.143996	0.0544335	2.64537	0.00816027	0.0859247	Coding
Ric8b	184.328	-0.24871	0.0940515	-2.6444	0.00818353	0.0861058	Coding
Gm10443	331.245	0.245735	0.0929549	2.64359	0.00820309	0.0861695	Predicted
Akap7	561.146	0.206736	0.0782085	2.6434	0.00820777	0.0861695	Coding
Bmp1	305.354	-0.280967	0.106276	-2.64375	0.00819932	0.0861695	Coding
AC153959.1	300.888	0.31574	0.119469	2.64285	0.00822112	0.0862459	Noncoding
Ybx1-ps2	72.9123	0.370364	0.140159	2.64247	0.00823043	0.0862799	Noncoding
A330040F15Rik	24.8657	-0.626275	0.237087	-2.64154	0.0082529	0.0864517	Noncoding
Bcl2l11	418.022	0.222774	0.0843942	2.63968	0.00829838	0.0868642	Coding
Gpat4	741.303	-0.139938	0.0530379	-2.63845	0.00832849	0.0871152	Coding
Kank2	348.62	-0.2236	0.0847684	-2.63777	0.00834532	0.0871629	Coding
Tsen2	177.267	0.34234	0.129775	2.63796	0.00834074	0.0871629	Coding
Bag6	1103.81	-0.142706	0.0541412	-2.63582	0.00839351	0.0876019	Coding
CT010444.1	13.2246	0.994753	0.377539	2.63483	0.00841789	0.0877918	Noncoding
Tmem119	13.8236	1.19966	0.455519	2.63361	0.00844831	0.0880445	Coding
Utp23	892.737	0.163286	0.0620313	2.63231	0.00848071	0.0883174	Coding
Prdm4	219.715	-0.223643	0.0850005	-2.63108	0.00851145	0.0885079	Coding
Nim1k	50.5493	-0.445033	0.169136	-2.63121	0.00850816	0.0885079	Coding
Cltc	2372.41	-0.109387	0.041586	-2.63037	0.00852912	0.0886268	Coding
Gm14830	10.7494	0.942711	0.358742	2.62782	0.00859328	0.0892283	Predicted
Galt	169.746	0.301294	0.114737	2.62596	0.0086405	0.089653	Coding
Notum	35.0985	0.554336	0.211232	2.62429	0.00868287	0.0899542	Coding
Col17a1	13.0405	-0.80779	0.307804	-2.62436	0.0086811	0.0899542	Coding
Gm7285	74.8349	0.375136	0.14296	2.62407	0.00868851	0.0899542	Predicted
Chchd1	2331.91	0.184734	0.0704152	2.6235	0.00870318	0.0900405	Coding
Carnmt1	1524.3	0.167705	0.0639429	2.62273	0.00872285	0.0901784	Coding
Hnrnpul1	666.771	-0.150117	0.0572441	-2.62241	0.0087311	0.0901982	Coding
Wdr35	221.54	-0.216906	0.0827212	-2.62213	0.00873813	0.0902052	Coding
Ago2	1469.95	-0.112894	0.0430717	-2.62108	0.00876526	0.0904196	Coding
Tor3a	859.447	0.20144	0.0768708	2.6205	0.00878	0.0905059	Coding
Hdac9	13.3303	1.10462	0.421594	2.62011	0.00879015	0.0905449	Coding
Ndufa6	5342.31	0.126511	0.0483192	2.61823	0.00883862	0.0909295	Coding
Cdc42ep1	314.985	-0.20365	0.0777832	-2.61817	0.00884028	0.0909295	Coding
Atr	121.213	-0.287124	0.109693	-2.61751	0.00885726	0.0910383	Coding
2020-03-09	388.534	-0.273591	0.10457	-2.61635	0.00888754	0.0912836	Coding
Pcyt2	538.565	-0.309455	0.118367	-2.61437	0.0089392	0.0917478	Coding
Vwa1	416.546	-0.51763	0.198089	-2.61312	0.00897189	0.0920169	Coding
Gm6311	10.1966	0.920252	0.352214	2.61277	0.00898129	0.0920193	Predicted
Lyrm4	50.6631	-0.430305	0.164702	-2.61262	0.00898507	0.0920193	Coding
Leng1	352.838	-0.201467	0.0771221	-2.61231	0.00899325	0.0920367	Coding
Nubp1	1401.66	0.3461	0.132552	2.61105	0.00902656	0.0923112	Coding
Sh3rf1	191.519	-0.271775	0.10413	-2.60997	0.00905507	0.0925362	Coding
Prrg4	140.529	0.3292	0.126155	2.60948	0.00906793	0.092601	Coding
Snhg3	315.462	0.210687	0.0807743	2.60834	0.00909828	0.0926654	Noncoding
Tigd2	539.632	0.17255	0.0661439	2.6087	0.00908861	0.0926654	Coding
Susd6	1465.56	-0.188033	0.0720914	-2.60826	0.0091003	0.0926654	Coding
Tapt1	211.293	-0.216899	0.0831355	-2.60899	0.00908106	0.0926654	Coding
Exoc3l4	986.246	0.293432	0.112526	2.60769	0.00911552	0.0927538	Coding
Dnajc5	1591.13	-0.123164	0.0472521	-2.60654	0.00914626	0.093	Coding
Dpt	49.6486	1.59184	0.611323	2.60392	0.00921651	0.0933828	Coding
Tmem63b	681.45	-0.143793	0.0552152	-2.60422	0.00920833	0.0933828	Coding
Laptm4a	6983.92	0.136499	0.0524207	2.60391	0.00921675	0.0933828	Coding
1700061I17Rik	7.10714	-1.15402	0.443083	-2.60453	0.00920004	0.0933828	Noncoding
Ddx17	1482.11	-0.162617	0.0624351	-2.60457	0.00919891	0.0933828	Coding
Csgalnact1	399.096	-0.183974	0.0706824	-2.60283	0.00924586	0.093611	Coding
Trim3	227.777	-0.262251	0.100801	-2.60167	0.00927708	0.0938602	Coding
Psmb2	9600.35	0.175633	0.0675212	2.60115	0.0092911	0.0939353	Coding
Mrps10	1765.04	0.243357	0.0935988	2.6	0.0093224	0.0941847	Coding
Brix1	3449.39	0.172631	0.066412	2.5994	0.0093386	0.0942814	Coding
Lgals3	19944.5	0.260515	0.100274	2.59802	0.00937638	0.0945956	Coding
Grn	2677.82	0.178617	0.0687827	2.59684	0.0094087	0.0948544	Coding
Fnta	1279.45	-0.151736	0.0584453	-2.5962	0.00942611	0.0949625	Coding
Rbms2	1898.24	-0.159837	0.0616032	-2.59462	0.00946942	0.0953313	Coding
Fhod1	329.233	-0.211703	0.0816019	-2.59433	0.00947743	0.0953445	Coding
Gpr146	49.0278	-0.412229	0.159016	-2.59238	0.00953151	0.0958206	Coding
Gm45051	54.435	0.400062	0.154482	2.5897	0.00960605	0.0964337	Predicted
Prl2c5	11.603	1.16003	0.447935	2.58973	0.00960516	0.0964337	Coding
Tns1	21.2229	-0.734383	0.283634	-2.58919	0.00962007	0.0965062	Coding
Sh3rf2	6.62445	1.43002	0.552509	2.58823	0.00964709	0.096709	Coding
Sdccag8	156.594	-0.267623	0.103453	-2.5869	0.00968449	0.0970155	Coding
Sufu	238.942	-0.206907	0.0800446	-2.58489	0.00974098	0.0975127	Coding
Map3k1	87.4767	-0.411063	0.159255	-2.58116	0.00984702	0.0985048	Coding
Rpl9-ps7	52.0348	0.454012	0.175914	2.58087	0.00985508	0.0985161	Ribosomal
Ost4	7482.65	-0.1394	0.0540273	-2.58019	0.00987473	0.0985317	Coding
Cxcl1	7204.31	0.607853	0.235585	2.58018	0.00987481	0.0985317	Coding
Prkci	272.693	-0.19533	0.0757138	-2.57985	0.00988436	0.0985317	Coding
Gm37060	163.025	0.258597	0.100234	2.57995	0.00988158	0.0985317	Predicted
Plekhh3	193.785	-0.289615	0.112297	-2.57902	0.0099082	0.0986589	Coding
Hace1	150.958	-0.243667	0.0944842	-2.57892	0.009911	0.0986589	Coding
Rad21	2620.72	-0.106283	0.0412166	-2.57865	0.00991866	0.098666	Coding
Rps6-ps2	18.1284	0.664487	0.257793	2.57759	0.0099491	0.0987596	Ribosomal
F13a1	13.8531	1.07967	0.418905	2.57736	0.00995586	0.0987596	Coding
Cry1	261.088	0.29437	0.114207	2.57751	0.0099516	0.0987596	Coding
Cit	259.688	-0.257162	0.0997614	-2.57777	0.00994403	0.0987596	Coding
Llgl1	236.746	-0.195987	0.0760821	-2.576	0.00999515	0.0990663	Coding
AC159890.1	189.866	-0.600586	0.233186	-2.57556	0.0100077	0.0990663	Noncoding
Pcbp4	718.222	-0.141269	0.0548465	-2.57572	0.0100032	0.0990663	Coding
Ephx1	358.879	0.34027	0.132144	2.57501	0.0100239	0.0991474	Coding
Fth1	307417	0.129389	0.050252	2.5748	0.0100298	0.0991474	Coding
C4bp	52.4453	0.754495	0.293091	2.57427	0.0100451	0.0991644	Coding
Slc35e3	144.458	-0.278055	0.108014	-2.57426	0.0100455	0.0991644	Coding
Itga6	66.1397	-0.439111	0.170635	-2.57339	0.0100707	0.0993438	Coding
Cdc42ep5	630.216	-0.298471	0.115997	-2.5731	0.0100792	0.099359	Coding
3110043O21Rik	300.684	-0.256135	0.0996069	-2.57146	0.010127	0.0997616	Coding
Adprhl2	535.277	0.144377	0.0561738	2.57019	0.0101642	0.0999243	Coding
Gm20045	67.2363	0.358796	0.1396	2.57018	0.0101647	0.0999243	Predicted
Dixdc1	299.435	-0.213811	0.0831748	-2.57063	0.0101515	0.0999243	Coding
Tmx3	1147.08	-0.201342	0.078369	-2.56916	0.0101945	0.100149	Coding
Clk3	486.476	-0.180723	0.0703711	-2.56814	0.0102245	0.100374	Coding
Trpc1	23.8679	-0.623361	0.242755	-2.56786	0.0102329	0.100385	Coding
Gm37033	54.1526	-0.488078	0.190089	-2.56763	0.0102397	0.100385	Predicted
Pip4k2b	203.104	-0.215685	0.0840197	-2.56707	0.0102562	0.100477	Coding
Nr2f6	1240.21	-0.157501	0.0614035	-2.56502	0.010317	0.101003	Coding
Prdx5	10141.5	-0.148793	0.0580383	-2.5637	0.0103562	0.101247	Coding
Prelid2	507.588	-0.213208	0.0831587	-2.56387	0.0103513	0.101247	Coding
Gm4366	757.018	0.195319	0.0762043	2.56309	0.0103745	0.101356	Predicted
Ndufc1	4574.68	0.107413	0.0419137	2.56272	0.0103857	0.101396	Coding
Tomm5	2265.11	0.20901	0.0816429	2.56005	0.0104656	0.102107	Coding
Ubr2	1298.53	-0.135609	0.0530027	-2.55853	0.0105116	0.102485	Coding
Arhgdia	4459.97	-0.0812377	0.0317548	-2.55828	0.010519	0.102487	Coding
Zmiz1	798.484	-0.209911	0.082121	-2.55612	0.0105848	0.103057	Coding
Fdft1	1812.04	-0.423591	0.165742	-2.55572	0.0105968	0.103103	Coding
Thbs1	1430.81	-0.298121	0.116715	-2.55426	0.0106414	0.103362	Coding
Emc3	1672.39	0.0984168	0.0385324	2.55413	0.0106452	0.103362	Coding
Pld2	183.307	-0.26134	0.102304	-2.55454	0.0106328	0.103362	Coding
Gm11737	28.9457	0.626549	0.245391	2.55327	0.0106717	0.103543	Predicted
Irf8	193.994	0.870259	0.340871	2.55305	0.0106785	0.103543	Coding
Rem2	57.0246	-0.441983	0.173293	-2.55049	0.0107571	0.104235	Coding
Chst1	287.618	0.307369	0.120664	2.54732	0.0108555	0.104974	Coding
Akt1	2588.32	-0.112542	0.0441786	-2.54743	0.0108519	0.104974	Coding
Gtf2ird1	429.372	-0.181579	0.0712716	-2.54771	0.0108432	0.104974	Coding
Havcr2	9.41736	-1.10334	0.433348	-2.54607	0.0108942	0.105263	Coding
Aspscr1	763.504	0.181933	0.0714685	2.54564	0.0109076	0.105263	Coding
Gm3244	149.839	0.255501	0.100365	2.54571	0.0109056	0.105263	Predicted
Zfas1	2889.01	0.125502	0.0493093	2.5452	0.0109214	0.105325	Noncoding
Srgap3	205.805	-0.299359	0.117639	-2.54473	0.0109361	0.105395	Coding
Emc4	1546.89	0.108189	0.0425215	2.54434	0.0109485	0.105442	Coding
Sccpdh	598.036	-0.254878	0.100206	-2.54354	0.0109737	0.105613	Coding
Gng11	5855.97	-0.586368	0.230678	-2.54193	0.0110243	0.1059	Coding
Mark4	190.249	-0.231543	0.0910997	-2.54164	0.0110333	0.1059	Coding
Prkab2	165.132	-0.274069	0.107816	-2.54199	0.0110222	0.1059	Coding
Prmt2	698.302	-0.203302	0.0799834	-2.5418	0.0110285	0.1059	Coding
Olfr56	17.5038	0.728274	0.286648	2.54065	0.0110646	0.106129	Coding
Dennd1b	285.63	-0.194247	0.0764811	-2.5398	0.0110915	0.106316	Coding
Rnf115	954.233	0.190402	0.0749843	2.53923	0.0111097	0.106418	Coding
Zfp462	241.041	-0.289299	0.113966	-2.53846	0.0111342	0.10658	Coding
Axin2	30.6841	-0.599113	0.236084	-2.53772	0.0111579	0.106736	Coding
Guk1	1333.86	0.146234	0.0576316	2.5374	0.0111681	0.106761	Coding
Cda	1328.75	-0.161198	0.0635708	-2.53572	0.0112215	0.1072	Coding
Tnrc6c	604.01	-0.166435	0.065644	-2.53542	0.0112314	0.107222	Coding
Raf1	533.698	-0.153181	0.0604344	-2.53467	0.0112554	0.107379	Coding
Fam91a1	572.782	-0.149085	0.0588332	-2.53403	0.011276	0.107504	Coding
Wiz	316.196	-0.200201	0.0790148	-2.53371	0.0112861	0.107528	Coding
Dppa5a	8.38379	1.19215	0.470681	2.53281	0.0113152	0.107733	Coding
Polr2l	2797.15	0.11689	0.0461625	2.53214	0.0113369	0.107817	Coding
Pkd1	352.612	-0.195848	0.0773469	-2.53207	0.0113392	0.107817	Coding
Cox7b	9716.99	0.108606	0.0428998	2.53163	0.0113534	0.10788	Coding
Spast	457.21	-0.169604	0.0670049	-2.53122	0.0113668	0.107935	Coding
Fzd6	257.228	-0.276797	0.109368	-2.53088	0.0113776	0.107965	Coding
Mir763	99.566	-0.382609	0.151231	-2.52996	0.0114074	0.108176	Noncoding
Tctn2	140.736	-0.260272	0.102925	-2.52876	0.0114467	0.108477	Noncoding
Epm2a	23.8571	-0.597002	0.236224	-2.52728	0.0114951	0.10879	Coding
Zfyve16	190.014	-0.229272	0.090711	-2.5275	0.0114877	0.10879	Coding
Lmo4	898.54	0.170526	0.0674936	2.52655	0.0115189	0.108943	Coding
Fzd1	319.94	0.352514	0.139571	2.5257	0.011547	0.109063	Coding
Cpd	422.623	-0.167113	0.0661622	-2.52581	0.0115432	0.109063	Coding
Gm13470	120.556	0.333928	0.132235	2.52526	0.0115611	0.109104	Predicted
Eid3	115.539	0.283718	0.112359	2.5251	0.0115666	0.109104	Coding
A230050P20Rik	401.921	0.216703	0.0858726	2.52355	0.0116178	0.109441	Coding
Cryab	10642.6	0.242328	0.0960184	2.52377	0.0116104	0.109441	Coding
Il13ra1	756.639	0.158665	0.0628839	2.52315	0.011631	0.109493	Coding
Ifi27l2a	1105.72	0.842263	0.334057	2.52131	0.0116918	0.109992	Coding
Dync1h1	1598.64	-0.124141	0.0492487	-2.5207	0.0117122	0.110112	Coding
Plekha8	166.31	-0.237076	0.0940633	-2.52038	0.0117227	0.110138	Coding
Gm10146	15.8871	0.841209	0.333921	2.51918	0.0117628	0.110441	Predicted
Ppfibp1	1554.22	-0.114148	0.0453448	-2.51733	0.0118247	0.110949	Coding
H2-T23	2951.25	0.182597	0.0725586	2.51655	0.0118511	0.111051	Coding
Rpl29	522.207	0.166472	0.0661487	2.51664	0.011848	0.111051	Ribosomal
Setx	437.046	-0.176177	0.0700916	-2.51352	0.0119532	0.111933	Coding
Gpd1l	137.711	0.286762	0.114227	2.51047	0.0120572	0.112833	Coding
Usp43	95.6276	-0.452045	0.180088	-2.51014	0.0120684	0.112863	Coding
Sh3pxd2b	360.865	-0.232717	0.0927553	-2.50894	0.0121096	0.113081	Coding
Ripor1	361.171	-0.205085	0.0817476	-2.50876	0.0121156	0.113081	Coding
Mink1	303.194	-0.207437	0.0826707	-2.5092	0.0121006	0.113081	Coding
Cdan1	59.2015	-0.375633	0.149852	-2.5067	0.0121865	0.113669	Coding
Bnip1	443.344	-0.185686	0.0740962	-2.50601	0.0122101	0.113814	Coding
Usp17la	45.7691	0.777322	0.310248	2.50549	0.0122282	0.113824	Coding
Rapgef1	289.186	-0.196693	0.078511	-2.50529	0.012235	0.113824	Coding
Mief1	183.423	-0.238728	0.0952896	-2.50529	0.0122352	0.113824	Coding
Hadhb	1109.36	0.120453	0.048089	2.50478	0.0122526	0.113884	Coding
Mob3b	94.8735	-0.420282	0.167801	-2.50464	0.0122576	0.113884	Coding
Rps13-ps1	9.28227	0.985731	0.393798	2.50314	0.0123098	0.114294	Ribosomal
Ppia	67123.1	-0.056401	0.0225435	-2.50187	0.0123539	0.114604	Coding
Sin3b	5643.47	-0.0908474	0.0363141	-2.50171	0.0123594	0.114604	Coding
Nexn	249.774	-0.248931	0.0995703	-2.50005	0.0124175	0.115068	Coding
Cdk8	571.152	-0.137235	0.0549182	-2.4989	0.012458	0.115368	Coding
Ndfip2	1557.68	-0.140418	0.0562048	-2.49833	0.0124781	0.115479	Coding
Apol11b	218.235	0.401568	0.160985	2.49445	0.0126152	0.11652	Coding
Ensa	574.673	-0.15506	0.0621581	-2.4946	0.0126099	0.11652	Coding
Phf21b	20.3935	-0.653389	0.261892	-2.49488	0.0125999	0.11652	Coding
Arhgap23	199.665	-0.232249	0.093129	-2.49384	0.0126369	0.116645	Coding
Pias3	149.643	-0.25239	0.101216	-2.49357	0.0126467	0.11666	Coding
Slc25a11	1286.54	-0.115895	0.0464847	-2.49318	0.0126604	0.11671	Coding
Htra2	1815.86	0.256909	0.103058	2.49286	0.0126718	0.11674	Coding
Adcy6	127.1	-0.36821	0.147753	-2.49206	0.0127004	0.116928	Coding
Gm10064	21.2085	0.69927	0.280627	2.49182	0.0127091	0.116932	Predicted
Tspan4	2086.5	0.107207	0.0430368	2.49106	0.0127362	0.116993	Coding
Ube3c	512.154	-0.166914	0.0669997	-2.49127	0.0127289	0.116993	Coding
Scaf8	390.192	-0.166373	0.0667912	-2.49094	0.0127404	0.116993	Coding
Eya1	62.0373	0.393295	0.157913	2.49058	0.0127534	0.117037	Coding
Fxyd5	869.461	-0.260793	0.104749	-2.4897	0.0127849	0.11725	Coding
Rps18-ps1	35.9884	0.489302	0.196556	2.48937	0.0127968	0.117283	Ribosomal
Ptpn12	894.445	-0.139108	0.0559262	-2.48735	0.0128698	0.117725	Coding
Actr1b	536.183	-0.140003	0.0562818	-2.48754	0.0128632	0.117725	Coding
Entpd7	179.985	-0.258789	0.104024	-2.48777	0.0128548	0.117725	Coding
Sipa1	341.549	-0.188631	0.0758916	-2.48554	0.0129357	0.118251	Coding
Smo	858.581	-0.16894	0.0680217	-2.48361	0.0130058	0.118815	Coding
Ccl5	734.584	0.357477	0.14395	2.48333	0.0130159	0.118832	Coding
Aspn	462.341	1.80078	0.725238	2.48301	0.0130276	0.118862	Coding
Ncbp3	233.266	-0.212936	0.0857773	-2.48243	0.0130488	0.11898	Coding
Stab1	28.3901	-0.550836	0.221943	-2.48188	0.0130691	0.119088	Coding
Serpinb9b	82.3914	0.776949	0.3131	2.48147	0.0130842	0.11915	Coding
Vopp1	358.731	-0.184508	0.0743813	-2.48056	0.0131174	0.119205	Coding
Bmpr2	661.379	-0.34455	0.138874	-2.48102	0.0131008	0.119205	Coding
Ncam1	1934.15	-0.456046	0.183839	-2.48068	0.0131133	0.119205	Coding
Scaf1	337.16	-0.17749	0.0715572	-2.48039	0.0131239	0.119205	Coding
Rabepk	605.665	0.158649	0.0639886	2.47934	0.0131628	0.119253	Coding
Coa3	1786.59	0.120113	0.0484434	2.47944	0.0131588	0.119253	Coding
Rnasek	12.936	0.780547	0.314774	2.4797	0.0131491	0.119253	Coding
Gm42555	9.30209	0.884756	0.356814	2.4796	0.0131529	0.119253	Predicted
Pcdhb9	11.9888	0.920225	0.371241	2.47878	0.0131834	0.119364	Coding
Hlx	70.8509	-0.353392	0.142625	-2.47778	0.0132204	0.119471	Coding
AC125321.1	21.2235	0.651516	0.262915	2.47805	0.0132104	0.119471	Noncoding
Ctbp2	573.043	-0.141927	0.057275	-2.47799	0.0132126	0.119471	Coding
Rpl13	97712.8	-0.0702172	0.0283416	-2.47753	0.0132294	0.119476	Ribosomal
Smim26	506.66	0.167172	0.0674893	2.47702	0.0132485	0.119573	Coding
Tgfbr2	899.698	-0.192794	0.0778423	-2.47673	0.0132592	0.119594	Coding
Eepd1	53.7719	-0.455138	0.183809	-2.47615	0.0132807	0.119646	Coding
Asl	604.975	-0.165035	0.0666506	-2.47612	0.0132818	0.119646	Coding
H2-Q7	4103.65	0.172451	0.0696521	2.47589	0.0132906	0.119649	Coding
Tmod3	2522.56	-0.266094	0.107519	-2.47486	0.013329	0.119852	Coding
Tnks2	1643.04	-0.13648	0.0551521	-2.4746	0.0133384	0.119852	Coding
Prr12	215.926	-0.212688	0.0859459	-2.47468	0.0133357	0.119852	Coding
Gm28192	10.713	-0.84537	0.341783	-2.47341	0.0133829	0.1201	Predicted
Gm7936	39.4645	0.457533	0.184975	2.47348	0.0133803	0.1201	Predicted
Lpar6	218.521	0.288182	0.116533	2.47296	0.0134	0.120178	Coding
Cenpx	647.956	0.227963	0.0922001	2.47248	0.0134181	0.120264	Coding
Arhgap12	230.677	-0.216827	0.0877341	-2.47141	0.0134582	0.120547	Coding
Majin	10.2131	0.981652	0.397303	2.47079	0.0134814	0.120603	Coding
9430034N14Rik	81.2111	0.300981	0.121812	2.47087	0.0134786	0.120603	Noncoding
Nsd2	2010.04	-0.136946	0.0554388	-2.47022	0.0135032	0.120722	Coding
mt-Nd2	31930.2	0.142111	0.057585	2.46785	0.0135927	0.121079	Mitochondrial
Myo5a	639.037	-0.143478	0.0581837	-2.46595	0.0136649	0.121079	Coding
Me3	48.77	0.471364	0.190992	2.46798	0.0135878	0.121079	Coding
Fam171a1	76.8768	-0.321949	0.130491	-2.46722	0.0136166	0.121079	Coding
Rfesd	197.048	0.229325	0.0928985	2.46855	0.0135661	0.121079	Coding
Cat	973.865	0.137577	0.0557856	2.46618	0.0136564	0.121079	Coding
Lrp1	3122.07	-0.274675	0.111263	-2.46869	0.0135609	0.121079	Coding
Phyh	911.751	0.117648	0.0477013	2.46634	0.0136502	0.121079	Coding
9530013L04Rik	49.2081	0.6247	0.253201	2.46721	0.0136171	0.121079	Noncoding
Timm10b	1519.58	0.128022	0.0519158	2.46597	0.0136645	0.121079	Coding
Nuak1	595.79	-0.636751	0.258234	-2.4658	0.0136709	0.121079	Coding
Aff1	197.279	-0.216477	0.0877731	-2.46633	0.0136507	0.121079	Coding
Zfp1	308.765	0.188816	0.0765512	2.46653	0.013643	0.121079	Coding
Adat1	66.7705	-0.330806	0.134024	-2.46825	0.0135776	0.121079	Coding
Ankrd1	1503.43	-0.219895	0.089117	-2.46748	0.0136067	0.121079	Coding
Ikbkg	474.605	0.246218	0.0998858	2.46499	0.0137016	0.121275	Coding
Gm10039	1468.56	0.220692	0.0895819	2.46357	0.013756	0.121681	Predicted
Bcl2l2	161.214	-0.237924	0.0966312	-2.46218	0.0138093	0.12204	Coding
Dmtf1	483.182	-0.158906	0.0645414	-2.46207	0.0138138	0.12204	Coding
Fhod3	54.1365	0.454746	0.184815	2.46055	0.0138723	0.122481	Coding
5430403N17Rik	95.2369	0.316896	0.128816	2.46006	0.0138914	0.122569	Noncoding
Clec3b	9.03978	1.52992	0.621956	2.45985	0.0138995	0.122569	Coding
Fktn	119.02	-0.270753	0.11015	-2.45804	0.0139697	0.123111	Coding
Acap1	87.6224	-0.383065	0.155903	-2.45708	0.0140073	0.123193	Coding
Sec24c	371.275	-0.177177	0.0721266	-2.45647	0.0140309	0.123193	Coding
Dpysl2	942.843	-0.294999	0.120086	-2.45656	0.0140275	0.123193	Coding
Gm36933	8.62819	-1.1078	0.450879	-2.45698	0.0140109	0.123193	Predicted
Mast4	2318.44	-0.152384	0.0620269	-2.45674	0.0140203	0.123193	Coding
Csnk1g1	632.691	-0.140308	0.0570943	-2.45747	0.013992	0.123193	Coding
Slc7a11	234.9	0.582045	0.236988	2.45601	0.014049	0.123276	Coding
Pex19	357.934	-0.174382	0.0710246	-2.45524	0.0140792	0.123464	Coding
Myo9a	371.794	-0.174134	0.0709324	-2.45492	0.0140915	0.123496	Coding
Gm12976	20.7423	0.67026	0.273069	2.45455	0.0141063	0.123549	Predicted
Ntn1	245.019	0.26726	0.108981	2.45236	0.0141923	0.12415	Coding
Ppp6r2	37.9488	-0.473029	0.192885	-2.45239	0.0141911	0.12415	Coding
Sppl3	529.22	-0.150343	0.0613111	-2.45213	0.0142014	0.124153	Coding
Stim2	454.528	-0.162368	0.0662267	-2.45171	0.014218	0.124222	Coding
Rdh14	429.379	0.162415	0.0662903	2.45005	0.0142837	0.124719	Coding
Cul3	865.057	-0.140632	0.0574097	-2.44961	0.014301	0.12472	Coding
Gm37084	105.616	0.379425	0.154893	2.4496	0.0143014	0.12472	Predicted
Unc119b	321.247	-0.186283	0.0760822	-2.44845	0.0143474	0.124962	Coding
Rap1b	3062.62	-0.0992343	0.0405308	-2.44837	0.0143504	0.124962	Coding
2010300F17Rik	49.8089	-0.435908	0.178049	-2.44824	0.0143555	0.124962	Noncoding
Dnpep	790.506	-0.174796	0.0714454	-2.44657	0.0144223	0.125467	Coding
Adam10	396.444	-0.170384	0.0696554	-2.4461	0.0144412	0.125555	Coding
Agbl5	90.6226	-0.330593	0.135178	-2.44562	0.0144605	0.125595	Coding
Kif1b	471.701	-0.157145	0.0642577	-2.44554	0.0144635	0.125595	Coding
Abca1	12.4661	0.823537	0.336837	2.44491	0.0144887	0.125737	Coding
Them6	332.03	0.516574	0.211422	2.44333	0.0145525	0.126213	Coding
Itsn1	230.352	-0.209736	0.0858606	-2.44274	0.014576	0.12634	Coding
Tom1	116.106	-0.28502	0.116716	-2.44199	0.0146066	0.126451	Coding
Irgq	167.328	-0.298211	0.122128	-2.44179	0.0146148	0.126451	Coding
Mettl7a1	205.353	0.255451	0.104617	2.44177	0.0146154	0.126451	Coding
1110008F13Rik	4631.14	0.164448	0.0674022	2.4398	0.0146952	0.126928	Coding
Ifrd2	444.425	0.367367	0.150557	2.44005	0.0146853	0.126928	Coding
Crim1	519.88	-0.191626	0.0785431	-2.43975	0.0146974	0.126928	Coding
Sema3d	163.306	0.531624	0.218008	2.43855	0.0147462	0.127135	Coding
Hspd1	9989.33	0.208829	0.0856329	2.43865	0.0147422	0.127135	Coding
Anp32b-ps1	16.1498	0.709715	0.291045	2.43851	0.0147482	0.127135	Noncoding
Arf2	213.381	0.214919	0.088155	2.43796	0.0147704	0.127249	Coding
Eif1-ps1	599.948	-0.213555	0.0876306	-2.437	0.0148098	0.127511	Noncoding
Ap1g1	537.926	-0.140991	0.0579076	-2.43477	0.0149014	0.128222	Coding
Kcnn1	39.7801	-0.483258	0.198501	-2.43454	0.0149105	0.128223	Coding
Runx1	1626.16	-0.193985	0.0797156	-2.43346	0.0149551	0.128529	Coding
Mrpl37	499.33	0.168971	0.069451	2.43296	0.014976	0.128631	Coding
Gm13532	40.6869	-0.462332	0.190056	-2.43261	0.0149905	0.128677	Predicted
Mtx2	1881.66	0.100523	0.0413599	2.43046	0.0150797	0.129365	Coding
Foxf1	156.242	-0.265524	0.109271	-2.42997	0.0151002	0.129463	Coding
Snhg17	571.9	0.201746	0.0830513	2.42918	0.0151332	0.129589	Noncoding
Nfatc3	401.104	-0.198006	0.0815114	-2.42918	0.015133	0.129589	Coding
Eci1	1308.04	0.157346	0.0647855	2.42872	0.0151522	0.129674	Coding
Ubxn7	308.07	-0.174987	0.0720576	-2.42844	0.015164	0.129697	Coding
Apc	364.912	-0.166038	0.0683869	-2.42792	0.0151857	0.129804	Coding
Specc1l	255.898	-0.209165	0.0861672	-2.42743	0.0152062	0.129901	Coding
Dync2h1	117.665	-0.32009	0.131917	-2.42645	0.0152473	0.129941	Coding
Pcbp1	6308.44	0.113331	0.0467006	2.42677	0.0152341	0.129941	Coding
Baiap2	1614.81	0.153626	0.0633126	2.42646	0.0152469	0.129941	Coding
Kdm5c	272.353	-0.215203	0.0886785	-2.42677	0.0152338	0.129941	Coding
AC160403.2	48.202	0.395784	0.163199	2.42516	0.0153016	0.130169	Noncoding
Maf	125.915	0.344931	0.142224	2.42526	0.0152975	0.130169	Coding
Zdhhc17	205.657	-0.220893	0.0910712	-2.42549	0.0152875	0.130169	Coding
Cox17	1251.41	0.174664	0.0720461	2.42434	0.0153364	0.130387	Coding
Rora	1088.62	-0.132824	0.0548001	-2.42379	0.0153596	0.130506	Coding
Rps15a-ps6	123.471	0.368513	0.15208	2.42316	0.0153862	0.130654	Ribosomal
Slc12a2	219.234	-0.229013	0.0945321	-2.42259	0.0154101	0.130779	Coding
Arid1a	713.97	-0.147098	0.0607488	-2.42141	0.0154603	0.131126	Coding
Gm10704	63.4788	0.359577	0.148576	2.42016	0.0155135	0.13139	Predicted
Gm10154	42.5653	0.427328	0.176563	2.42026	0.0155096	0.13139	Predicted
Cfdp1	5226.06	0.0763503	0.0315493	2.42003	0.0155191	0.13139	Coding
Naa38	1422	0.105344	0.0435367	2.41967	0.0155344	0.131442	Coding
Fzr1	749.578	-0.144797	0.059854	-2.41918	0.0155557	0.131515	Coding
Med15	481.836	-0.154147	0.0637224	-2.41904	0.0155616	0.131515	Coding
Apobec1	270.229	0.307951	0.127322	2.41868	0.0155768	0.131565	Coding
2810474O19Rik	2470.86	0.128304	0.0530708	2.4176	0.0156234	0.131724	Coding
Mrpl38	1001.28	0.255166	0.105539	2.41774	0.0156172	0.131724	Coding
C4b	17.7546	0.797116	0.329697	2.41772	0.0156181	0.131724	Coding
Gm15773	9.61359	0.938444	0.388316	2.4167	0.0156619	0.131924	Predicted
Fbxo18	271.773	-0.183362	0.0758758	-2.41661	0.0156657	0.131924	Coding
P2ry12	99.5121	-0.429411	0.177771	-2.41553	0.0157123	0.132098	Coding
Rev1	143.2	-0.235778	0.0976113	-2.41548	0.0157143	0.132098	Coding
Scamp1	254.661	-0.245516	0.10163	-2.41579	0.015701	0.132098	Coding
Gm17909	36.5104	0.464191	0.192262	2.41437	0.0157625	0.132425	Predicted
Lasp1	1269.25	-0.13589	0.0562942	-2.41392	0.0157818	0.132431	Coding
Tut1	161.252	0.265235	0.109876	2.41396	0.0157803	0.132431	Coding
Gm11539	74.1312	0.320711	0.132877	2.41359	0.0157963	0.132474	Predicted
Tgm2	636.33	0.16671	0.0690995	2.41261	0.0158387	0.132752	Coding
Pnpt1	317.219	0.190804	0.0791333	2.41117	0.0159015	0.133046	Coding
Hypk	6204.84	0.105419	0.0437212	2.41116	0.0159019	0.133046	Coding
Gm4604	878.381	0.132622	0.0550011	2.41126	0.0158977	0.133046	Predicted
Slpi	2854.36	0.821697	0.340967	2.4099	0.0159569	0.133428	Coding
Rpl17	48013.7	-0.0910553	0.0377889	-2.40958	0.0159709	0.133467	Ribosomal
Hdac1	1388.2	-0.0924847	0.0383869	-2.40927	0.0159843	0.1335	Coding
Ncstn	395.338	-0.232555	0.0965469	-2.40872	0.0160085	0.133624	Coding
Gm11472	43.0056	0.414505	0.172174	2.40748	0.0160631	0.134001	Predicted
Fkbp1b	248.097	-0.313466	0.130223	-2.40715	0.0160778	0.134044	Coding
AC153911.1	56.9248	0.368155	0.152959	2.40689	0.0160891	0.13406	Noncoding
Rps3a3	290.21	0.174506	0.0725171	2.40642	0.0161099	0.134102	Ribosomal
Erbin	604.291	-0.239097	0.099361	-2.40635	0.016113	0.134102	Coding
Tmem167	6610.93	0.104578	0.0434696	2.40577	0.0161386	0.134237	Coding
Gm12840	31.6405	0.5237	0.217871	2.40372	0.0162292	0.134911	Predicted
Cxcl11	138.189	1.25815	0.523499	2.40334	0.016246	0.134972	Coding
Gm6286	7.4716	1.11489	0.464013	2.40271	0.0162743	0.135128	Predicted
Arhgef7	287.784	-0.173575	0.0722619	-2.40202	0.0163046	0.135301	Coding
Trim24	418.22	-0.183384	0.0763591	-2.4016	0.0163234	0.135378	Coding
Casp4	87.8685	0.37807	0.157511	2.40028	0.0163826	0.135579	Coding
Cd164	2008.32	0.105243	0.0438513	2.4	0.0163952	0.135579	Coding
AC151730.2	903.578	-0.142239	0.0592662	-2.4	0.0163951	0.135579	Noncoding
Ammecr1l	314.469	-0.184257	0.0767493	-2.40076	0.016361	0.135579	Coding
Gm6467	15.7422	0.690025	0.287511	2.39999	0.0163954	0.135579	Predicted
Ciao1	603.863	-0.137553	0.0573363	-2.39906	0.0164373	0.135847	Coding
Alg9	240.156	-0.210766	0.087862	-2.39883	0.0164476	0.135853	Coding
Gm38111	49.6783	-0.485703	0.202501	-2.39852	0.0164616	0.135889	Predicted
Arhgap1	414.448	-0.149398	0.0623715	-2.3953	0.016607	0.13701	Coding
Pgbd1	8.54837	-0.957489	0.399955	-2.39399	0.016666	0.137417	Coding
Gm15772	30982.1	-0.070866	0.0296083	-2.39345	0.0166908	0.137463	Predicted
Tet3	380.8	-0.195513	0.081681	-2.39362	0.0166831	0.137463	Coding
Prkacb	327.61	-0.183258	0.0765899	-2.39271	0.0167243	0.137659	Coding
Ndufa7	5945.27	0.117045	0.0489368	2.39175	0.0167683	0.137941	Coding
Atox1	4746.04	0.0826033	0.0345552	2.39048	0.0168265	0.138339	Coding
Hnrnph2	1204.05	0.123369	0.0516281	2.38958	0.0168676	0.138597	Coding
Traf4	621.444	-0.165562	0.0693032	-2.38895	0.0168965	0.138755	Coding
Rpl6l	506.264	-0.147282	0.0616706	-2.3882	0.016931	0.138877	Ribosomal
Adcy7	229.238	-0.271468	0.113663	-2.38836	0.0169239	0.138877	Coding
Msx3	91.4711	-0.351429	0.147224	-2.38703	0.0169852	0.139241	Coding
Bid	868.077	0.274266	0.11496	2.38576	0.017044	0.139563	Coding
Fam43a	58.3537	0.427558	0.179203	2.38588	0.0170382	0.139563	Coding
Porcn	117.254	-0.283725	0.118948	-2.38529	0.0170658	0.139661	Coding
Gm43361	63.7983	0.486423	0.204003	2.38439	0.0171073	0.139839	Predicted
Zbtb5	67.6165	0.332261	0.139345	2.38446	0.0171042	0.139839	Coding
Yap1	430.579	-0.151081	0.0633739	-2.38396	0.0171276	0.139845	Coding
Peak1	1032.62	-0.210747	0.0884011	-2.38399	0.0171261	0.139845	Coding
Cyb561d2	342.994	0.18717	0.0785291	2.38345	0.0171511	0.139956	Coding
Ttc26	83.0641	-0.329047	0.138187	-2.38117	0.0172578	0.140746	Coding
Col5a3	693.142	-0.399809	0.167934	-2.38075	0.0172772	0.140823	Coding
Trpm6	236.626	0.224584	0.0943551	2.3802	0.0173035	0.140956	Coding
Rps26-ps1	1443.1	0.125358	0.0526744	2.37987	0.0173188	0.141	Ribosomal
Myo9b	651.891	-0.127866	0.0537413	-2.37928	0.0173464	0.141144	Coding
Ptcra	53.8115	-0.495729	0.208444	-2.37823	0.0173958	0.141182	Coding
Ptger4	184.831	0.317088	0.133324	2.37833	0.0173912	0.141182	Coding
Arl4a	439.143	0.196887	0.0828065	2.37768	0.0174221	0.141182	Coding
C330018D20Rik	68.4205	0.319818	0.134519	2.3775	0.0174305	0.141182	Coding
Acsl5	1696.7	0.286465	0.120473	2.37784	0.0174145	0.141182	Coding
Fgfr1	1419.39	-0.164095	0.0689939	-2.37839	0.0173882	0.141182	Coding
Sdhaf2	856.711	0.121322	0.0509982	2.37895	0.0173622	0.141182	Coding
Mgea5	1154.06	-0.125569	0.0528154	-2.3775	0.0174303	0.141182	Coding
Ago1	298.374	-0.196894	0.0828927	-2.37529	0.017535	0.141786	Coding
AL589661.1	32.5958	0.487637	0.205278	2.37549	0.0175255	0.141786	Noncoding
Pi16	9.38363	1.01463	0.427092	2.37566	0.0175175	0.141786	Coding
Ifrd1	7784.12	0.227699	0.0959067	2.37417	0.0175886	0.142139	Coding
Sbno1	1200.26	-0.129057	0.0543759	-2.37342	0.0176243	0.142346	Coding
Tmem131	285.921	-0.186578	0.0786472	-2.37234	0.0176756	0.142599	Coding
Tubb3	172.868	0.551329	0.232383	2.3725	0.0176683	0.142599	Coding
Uhmk1	314.756	-0.18346	0.0773531	-2.37172	0.0177054	0.142677	Coding
Ano6	528.027	-0.18451	0.0777919	-2.37185	0.0176994	0.142677	Coding
Arhgdig	356.005	-0.238959	0.100885	-2.36861	0.0178549	0.1438	Coding
Mef2a	1122.97	-0.258092	0.108997	-2.36789	0.0178901	0.143973	Coding
Tnfrsf1b	309.22	-0.185324	0.0782792	-2.36748	0.0179097	0.143973	Coding
Nampt	1982	0.156974	0.0663083	2.36733	0.0179168	0.143973	Coding
Kcnab2	99.3008	-0.299406	0.126463	-2.36754	0.0179069	0.143973	Coding
Kbtbd2	429.273	-0.16261	0.0687261	-2.36606	0.0179785	0.144387	Coding
Pls3	2221.05	-0.101699	0.0430005	-2.36507	0.0180267	0.144692	Coding
Pank4	40.6703	-0.446021	0.188674	-2.36398	0.0180799	0.145037	Coding
Smc5	564.331	-0.141219	0.0597532	-2.36337	0.0181097	0.145194	Coding
Ccdc25	1287.55	0.192712	0.0815658	2.36266	0.0181443	0.14539	Coding
Top3b	207.358	0.205918	0.0871671	2.36234	0.0181601	0.145435	Coding
Acaca	395.281	-0.21397	0.0906276	-2.36098	0.0182265	0.145802	Coding
Tnfrsf1a	1658.01	0.123324	0.0522307	2.36114	0.0182191	0.145802	Coding
Agap1	308.684	-0.169828	0.071944	-2.36056	0.0182475	0.145872	Coding
Arhgap8	1398.47	0.123081	0.0521443	2.36039	0.0182558	0.145872	Coding
Fam173a	991.917	0.14866	0.0629934	2.35993	0.0182784	0.145971	Coding
Nop14	1863.24	0.188479	0.0799002	2.35893	0.0183278	0.146283	Coding
Gm16416	23.0804	0.549658	0.233105	2.35799	0.0183743	0.146522	Predicted
Ccny	766.051	-0.148057	0.0627918	-2.3579	0.0183784	0.146522	Coding
Gm37390	12.3106	-0.7902	0.33538	-2.35614	0.0184661	0.147139	Predicted
Deptor	66.8901	0.334669	0.142056	2.35589	0.0184783	0.147153	Coding
Crtc2	168.099	-0.233386	0.0990808	-2.35552	0.018497	0.14722	Coding
Gm5837	33.8803	0.501209	0.212862	2.35462	0.0185415	0.14727	Predicted
Fasn	1047.44	-0.183714	0.078025	-2.35456	0.0185447	0.14727	Coding
Cic	352.204	-0.197096	0.0837048	-2.35465	0.01854	0.14727	Coding
Eno2	650.255	-0.378943	0.160918	-2.35489	0.0185282	0.14727	Coding
Thap12	575.865	-0.141017	0.059935	-2.35284	0.0186307	0.14787	Coding
Gm10313	12.8518	0.852546	0.362495	2.35188	0.0186787	0.147938	Predicted
Bckdhb	311.663	0.185485	0.0788681	2.35184	0.0186809	0.147938	Coding
Coa7	330.282	0.27711	0.117827	2.35184	0.0186806	0.147938	Coding
Rps19	41137.1	0.074386	0.0316287	2.35185	0.0186801	0.147938	Ribosomal
Virma	370.946	-0.164739	0.0700564	-2.35151	0.0186972	0.147985	Coding
Gm12816	40.2011	0.436947	0.185838	2.35123	0.0187115	0.148015	Predicted
Tle3	353.539	-0.162538	0.0691405	-2.35084	0.018731	0.148088	Coding
Ifi203-ps	16.8235	0.71346	0.303565	2.35027	0.0187599	0.148233	Noncoding
Gm5457	18.3264	0.60247	0.256429	2.34946	0.0188007	0.148473	Predicted
Eef2kmt	357.297	0.215365	0.09168	2.34909	0.0188192	0.148537	Coding
Kin	548.978	0.170615	0.0726483	2.34851	0.0188488	0.148605	Coding
Usp34	1296.34	-0.152848	0.0650779	-2.34869	0.0188396	0.148605	Coding
Gm8520	120.822	-0.245494	0.104573	-2.3476	0.018895	0.148887	Predicted
Ddx58	464.961	0.184012	0.078421	2.34646	0.0189528	0.149177	Coding
Ptk2	647.532	-0.149057	0.0635191	-2.34665	0.0189428	0.149177	Coding
BC023105	11.0888	0.825356	0.35187	2.34563	0.0189952	0.149428	Noncoding
Cycs	5923.41	0.270414	0.115311	2.3451	0.0190221	0.149557	Coding
Erbb2	158.723	-0.242395	0.103398	-2.34429	0.0190636	0.1498	Coding
Gm43794	77.1058	-0.386344	0.164894	-2.34298	0.0191305	0.15016	Predicted
Patj	132.245	-0.26166	0.111676	-2.34303	0.019128	0.15016	Coding
Cetn2	788.395	-0.146012	0.0623609	-2.3414	0.0192118	0.150417	Coding
Brd1	1618.17	-0.144941	0.0618946	-2.34173	0.0191944	0.150417	Coding
Noc4l	712.656	0.308094	0.131552	2.34199	0.0191813	0.150417	Coding
Pter	421.754	0.149634	0.063927	2.3407	0.0192478	0.150417	Coding
Gm3776	20.4151	1.31304	0.560936	2.34079	0.0192428	0.150417	Predicted
Mir142hg	23.6889	0.615517	0.262926	2.34102	0.0192309	0.150417	Noncoding
Dmpk	75.7031	-0.328549	0.140353	-2.34088	0.0192384	0.150417	Coding
Hip1	203.705	-0.207648	0.0887024	-2.34096	0.0192344	0.150417	Coding
Arhgap17	194.967	-0.205636	0.0878672	-2.3403	0.0192681	0.15049	Coding
Sft2d3	156.483	0.237718	0.101585	2.3401	0.0192784	0.15049	Coding
Chmp7	253.399	-0.199633	0.0853454	-2.33912	0.0193291	0.150801	Coding
Tfap2a	532.02	-0.159114	0.0680285	-2.33892	0.0193394	0.150801	Coding
Fam96a	1818.84	0.129346	0.0553331	2.3376	0.0194082	0.151254	Coding
Enoph1	321.839	0.170818	0.0731092	2.33648	0.019466	0.151275	Coding
Sigirr	552.86	0.17332	0.0741979	2.33591	0.019496	0.151275	Coding
Ifi209	8.39694	0.966785	0.413792	2.3364	0.0194703	0.151275	Coding
Ada	197.959	0.282876	0.121096	2.33596	0.0194934	0.151275	Coding
Slurp1	112.402	0.893391	0.382266	2.3371	0.0194342	0.151275	Coding
Aplp2	1020.16	-0.218353	0.0934252	-2.33719	0.0194292	0.151275	Coding
Ppif	365.688	0.339269	0.145196	2.33662	0.0194588	0.151275	Coding
Kdelr3	979.227	-0.264727	0.11332	-2.3361	0.0194863	0.151275	Coding
Crebbp	871.956	-0.131778	0.0564256	-2.33543	0.0195211	0.151387	Coding
Ptgs2	8457.7	-0.18276	0.0782887	-2.33444	0.0195728	0.151706	Coding
Traf7	1145.14	-0.105751	0.0453177	-2.33355	0.0196193	0.151836	Coding
Tdrd3	175.416	-0.211845	0.0907738	-2.33377	0.0196077	0.151836	Coding
Gm3272	20.0359	0.594782	0.254888	2.3335	0.0196217	0.151836	Predicted
Pcm1	2464.96	-0.116528	0.0499685	-2.33203	0.019699	0.152351	Coding
Rhou	313.316	-0.190234	0.0815899	-2.33159	0.0197224	0.152449	Coding
Sirt6	222.139	-0.247629	0.106226	-2.33116	0.0197452	0.152542	Coding
Tusc1	247.201	0.209243	0.0897855	2.33047	0.0197811	0.152737	Coding
Fahd1	195.483	0.224903	0.0965189	2.33015	0.0197982	0.152786	Coding
Snw1	1765.83	0.119082	0.0511253	2.32922	0.0198474	0.153082	Coding
Wsb2	873.594	-0.147967	0.0635539	-2.32821	0.0199008	0.153245	Coding
Slc41a2	160.618	-0.292966	0.125826	-2.32835	0.0198935	0.153245	Coding
Ndufa11	5422.19	0.090911	0.0390471	2.32824	0.0198994	0.153245	Coding
Mpc1	2528.91	0.117765	0.0506129	2.32678	0.0199772	0.15375	Coding
Cpne8	1277.66	0.135246	0.0581433	2.32608	0.0200145	0.153819	Coding
Ptch1	472.099	-0.227181	0.0976553	-2.32636	0.0199994	0.153819	Coding
Pds5b	1131.17	-0.143486	0.0616879	-2.326	0.0200186	0.153819	Coding
Rps27l	12669.6	0.200821	0.0863929	2.32451	0.020098	0.154345	Ribosomal
Hspb2	692.037	0.178867	0.0769797	2.32357	0.0201488	0.154652	Coding
Tmem251	622.25	0.142852	0.0615353	2.32147	0.0202617	0.155434	Coding
A930015D03Rik	242.689	0.207267	0.0893316	2.3202	0.0203303	0.155876	Noncoding
Asnsd1	749.244	-0.120214	0.0518167	-2.31998	0.0203421	0.155883	Coding
Stk38	400.052	-0.169098	0.0729263	-2.31875	0.0204087	0.156262	Coding
Fam89a	200.037	-0.277094	0.119506	-2.31866	0.0204136	0.156262	Coding
Sms-ps	20.4593	0.61128	0.263669	2.31836	0.0204298	0.156302	Noncoding
Tmed10	6770.94	0.0700964	0.0302501	2.31723	0.0204912	0.156603	Coding
BC003965	1042.8	0.121299	0.0523435	2.31736	0.020484	0.156603	Coding
Ndufs5	2525.83	0.10376	0.0447865	2.31678	0.0205157	0.156707	Coding
Ankrd13a	283.824	-0.190082	0.0820759	-2.31593	0.0205621	0.156977	Coding
2810403A07Rik	249.344	-0.234924	0.101467	-2.31527	0.0205981	0.157061	Coding
Gm18913	23.9267	0.592001	0.255687	2.31534	0.0205944	0.157061	Predicted
Gm16373	24.3554	0.53657	0.231768	2.31512	0.0206064	0.157061	Predicted
Ccnb1ip1	111.832	0.635435	0.274591	2.31412	0.0206613	0.157396	Coding
Gm42856	39.2551	0.47247	0.204191	2.31386	0.0206753	0.157418	Predicted
Rpl30-ps9	27.1598	0.551726	0.238686	2.31152	0.0208043	0.158307	Ribosomal
Ece2	219.817	0.310208	0.134212	2.31134	0.0208143	0.158307	Coding
Lrrk1	226.303	-0.215099	0.0930772	-2.31097	0.0208345	0.158376	Coding
Csrp2	1354.94	-0.584103	0.252799	-2.31054	0.0208581	0.15847	Coding
Itgb3	16.4488	-0.788069	0.341266	-2.30925	0.0209296	0.158929	Coding
Gm5865	18.6783	0.636926	0.275878	2.30872	0.0209591	0.159006	Predicted
Esd	27666.5	0.240716	0.104281	2.30834	0.0209802	0.159006	Coding
Arhgef40	403.021	-0.249473	0.108063	-2.30858	0.0209669	0.159006	Coding
Cebpz	1696	0.113354	0.0491078	2.30826	0.0209846	0.159006	Coding
Depdc1a	136.702	-0.253965	0.110062	-2.30747	0.0210286	0.159211	Coding
Chchd2	18292.9	0.124278	0.0538659	2.30717	0.0210451	0.159211	Coding
Atf3	3174.16	0.379607	0.164526	2.30727	0.0210397	0.159211	Coding
Ube2z	824.519	-0.124962	0.0541688	-2.3069	0.0210605	0.159242	Coding
Lysmd2	640.75	0.174802	0.0757867	2.3065	0.0210828	0.159297	Coding
Cd69	16.0618	0.911348	0.395167	2.30624	0.0210975	0.159297	Coding
Chchd2-ps	13.3909	0.750156	0.325283	2.30617	0.0211013	0.159297	Noncoding
Isca2	718.571	0.14769	0.0640789	2.30482	0.0211768	0.159456	Coding
Gclm	3543.09	0.54564	0.236663	2.30556	0.0211353	0.159456	Coding
Acads	660.096	-0.134989	0.0585692	-2.30479	0.0211786	0.159456	Coding
Edf1	5581.75	0.0904515	0.0392366	2.30528	0.0211508	0.159456	Coding
Ptgs2os2	664.645	0.211641	0.0918123	2.30515	0.0211581	0.159456	Noncoding
Strn3	1538.85	-0.10464	0.0454078	-2.30444	0.0211978	0.159516	Coding
Zfand2a	535.251	0.27128	0.117784	2.3032	0.0212675	0.159957	Coding
Plekhm3	102.199	-0.255246	0.11085	-2.30264	0.0212993	0.160111	Coding
Gm11410	10.9979	0.840561	0.365087	2.30236	0.0213149	0.160144	Predicted
Cstf2	542.236	-0.131829	0.0572838	-2.30134	0.0213725	0.160153	Coding
Smpdl3b	325.109	0.389217	0.169125	2.30136	0.0213713	0.160153	Coding
Stbd1	988.797	-0.231129	0.100418	-2.30166	0.0213545	0.160153	Coding
Prrc2a	1481.71	-0.140189	0.0608963	-2.30209	0.0213301	0.160153	Coding
Shoc2	730.451	-0.114873	0.0499081	-2.3017	0.0213522	0.160153	Coding
Atic	2506.84	-0.119094	0.0517649	-2.30067	0.0214103	0.160267	Coding
Hspbap1	109.543	-0.294725	0.128099	-2.30076	0.0214051	0.160267	Coding
Hilpda	3716.82	-0.225737	0.0981439	-2.30006	0.021445	0.160376	Coding
Fam114a2	1072.52	-0.181466	0.0788976	-2.30002	0.0214474	0.160376	Coding
Zswim8	293.587	-0.1754	0.076304	-2.2987	0.0215222	0.160851	Coding
Vapb	1389.81	-0.117106	0.0509577	-2.29811	0.0215555	0.161015	Coding
Emd	1892.61	-0.085246	0.0371034	-2.29752	0.021589	0.161096	Coding
Gm15131	29.5087	0.509958	0.221942	2.29771	0.0215783	0.161096	Predicted
Rab3il1	32.2737	0.797659	0.347247	2.29709	0.0216135	0.161194	Coding
Dbnl	2018.63	0.13506	0.0588097	2.29655	0.0216442	0.161338	Coding
AC122465.1	43.9978	-0.4029	0.175469	-2.29614	0.021668	0.161431	Noncoding
Nfkbiz	2255.71	0.29157	0.127002	2.29579	0.0216877	0.161477	Coding
Exoc2	300.562	-0.170023	0.0740636	-2.29563	0.0216969	0.161477	Coding
Atp5j	8441.91	0.111613	0.048644	2.29448	0.021763	0.161884	Coding
Trmt10c	566.898	0.145457	0.0634074	2.29401	0.0217901	0.161917	Coding
Abhd10	249.409	0.240619	0.104881	2.29421	0.0217787	0.161917	Coding
Ythdf3	463.13	-0.144489	0.0630315	-2.29233	0.0218867	0.16238	Coding
Mknk2	373.806	-0.237096	0.103419	-2.29257	0.0218726	0.16238	Coding
Fam167a	10.5675	-0.951319	0.41499	-2.29239	0.021883	0.16238	Coding
Ahcyl1	1600.23	-0.105478	0.0460311	-2.29146	0.021937	0.162668	Coding
Mrpl36	1413.01	0.150383	0.0656693	2.29	0.0220211	0.163207	Coding
Gm12933	176.686	0.199664	0.0872314	2.2889	0.0220851	0.163596	Predicted
Hsp90aa1	27529.4	0.149816	0.0655018	2.2872	0.0221841	0.164072	Coding
2410022M11Rik	96.1319	0.282725	0.12361	2.28723	0.0221821	0.164072	Noncoding
Ncs1	709.791	-0.130447	0.0570263	-2.28749	0.0221675	0.164072	Coding
Rpl17-ps10	111.351	0.249951	0.109311	2.28661	0.0222186	0.164242	Ribosomal
Tshz1	585.65	-0.20332	0.088937	-2.28611	0.0222477	0.164372	Coding
Trim8	779.31	-0.116215	0.0508409	-2.28587	0.0222621	0.164393	Coding
Gm5883	30.4681	0.483891	0.211712	2.28562	0.0222767	0.164415	Predicted
Fam102b	1691.7	-0.163275	0.0714453	-2.28532	0.0222941	0.164458	Coding
Nsdhl	452.257	-0.372313	0.162953	-2.28478	0.0223255	0.164604	Coding
Gm9794	5339.22	0.112447	0.0492247	2.28437	0.02235	0.164699	Predicted
Gm28707	29.1783	0.573704	0.251183	2.28401	0.0223708	0.164704	Predicted
Tuba1c	3019.16	0.179266	0.078489	2.28396	0.0223738	0.164704	Coding
Gm36988	22.3447	0.544928	0.238651	2.28337	0.0224086	0.16479	Predicted
Cog2	322.527	-0.164669	0.072116	-2.28339	0.0224075	0.16479	Coding
Dennd4b	80.6114	-0.303867	0.133092	-2.28314	0.0224221	0.164804	Coding
F730043M19Rik	80.3006	0.382097	0.167397	2.28258	0.0224553	0.164963	Noncoding
Gtf3c1	353.532	-0.168184	0.073692	-2.28226	0.0224739	0.165014	Coding
Cox7a2	9283.55	0.106059	0.0464801	2.28181	0.0225008	0.165126	Coding
9530056K15Rik	7.30368	-0.948444	0.415873	-2.28061	0.0225717	0.165561	Noncoding
Cdkl2	196.634	-0.273611	0.120028	-2.27957	0.0226335	0.165928	Coding
Gm8317	28.8093	0.484674	0.212702	2.27866	0.0226876	0.166239	Predicted
Wdcp	112.613	-0.251075	0.110207	-2.27822	0.0227136	0.166344	Coding
Med16	268.287	-0.189027	0.0830072	-2.27723	0.0227724	0.166689	Coding
Gm8185	39.879	0.410911	0.180467	2.27694	0.0227899	0.166731	Predicted
G2e3	560.23	-0.165852	0.0728654	-2.27614	0.0228374	0.166992	Coding
Eif2b3	1195.64	0.174657	0.0767469	2.27575	0.0228607	0.167001	Coding
Mrpl16	668.957	0.188194	0.0826961	2.27573	0.0228621	0.167001	Coding
Tanc1	286.141	-0.185245	0.0814077	-2.27553	0.0228743	0.167005	Coding
Tmco4	163.955	0.306611	0.13476	2.27525	0.0228912	0.167039	Coding
Zfp36l2	4069.91	-0.13272	0.0583396	-2.27496	0.0229085	0.167039	Coding
Gm17786	14.0645	0.69593	0.305922	2.27486	0.0229143	0.167039	Predicted
Rgs11	86.9589	-0.379385	0.166831	-2.27407	0.022962	0.167301	Coding
Dnmt3l	167.035	0.376534	0.165633	2.2733	0.0230079	0.167464	Coding
Gm28530	51.4302	0.395474	0.173963	2.27333	0.0230062	0.167464	Predicted
Sgsm2	91.3659	0.318259	0.14004	2.27264	0.023048	0.167499	Coding
Acvr1b	63.9909	-0.332218	0.146173	-2.27277	0.0230399	0.167499	Coding
Afg3l1	916.122	-0.113757	0.0500517	-2.27279	0.0230391	0.167499	Coding
Zfp280b	69.895	-0.304486	0.134043	-2.27156	0.0231129	0.167884	Coding
Chd3	1698.79	-0.18551	0.0816836	-2.27108	0.0231423	0.168012	Coding
2610001J05Rik	1368.76	-0.122959	0.0541702	-2.26986	0.0232161	0.16829	Coding
Gm12583	11.7874	0.789639	0.347833	2.27017	0.0231974	0.16829	Predicted
Fam204a	2085.91	0.0928872	0.0409211	2.26991	0.023213	0.16829	Coding
Fam193a	606.288	-0.136412	0.0601362	-2.26838	0.0233062	0.168624	Coding
Mcee	214.053	0.255826	0.11277	2.26857	0.0232947	0.168624	Coding
H2afx	1544.42	0.154204	0.0679729	2.26862	0.0232917	0.168624	Coding
Ppp3cc	100.641	-0.336437	0.14832	-2.26832	0.0233097	0.168624	Coding
Rab23	100.007	-0.300367	0.132452	-2.26774	0.0233453	0.168797	Coding
Rassf1	1307.07	-0.175833	0.0775604	-2.26705	0.0233871	0.169013	Coding
Gm20257	31.4213	0.476256	0.210112	2.26668	0.0234099	0.169091	Predicted
9230116N13Rik	9.40158	0.879016	0.387851	2.26638	0.0234283	0.169138	Noncoding
Tmem263	1016.94	-0.215061	0.0949015	-2.26615	0.023442	0.169151	Coding
Smim12	648.019	0.128828	0.0568628	2.26559	0.0234765	0.169314	Coding
Gm5292	122.266	0.271869	0.120014	2.26531	0.0234934	0.16935	Predicted
Tor1aip1	1131.27	0.101626	0.0448744	2.26468	0.0235325	0.169403	Coding
Stag2	118.128	-0.259318	0.114509	-2.26461	0.0235365	0.169403	Coding
Slc30a9	423.509	-0.212583	0.0938667	-2.26474	0.0235288	0.169403	Coding
N4bp3	143.924	-0.240479	0.106228	-2.2638	0.0235865	0.169677	Coding
Atp5c1	10406.7	0.0675328	0.0298351	2.26353	0.023603	0.16971	Coding
Aldoa	28383.1	-0.122437	0.0541159	-2.26251	0.0236662	0.169748	Coding
Slirp	3459.47	0.127044	0.0561516	2.26251	0.0236657	0.169748	Coding
Gm37255	58.5087	0.336183	0.148562	2.26292	0.0236404	0.169748	Predicted
Maz	925.746	-0.125402	0.055427	-2.26248	0.023668	0.169748	Coding
Emp3	16479.9	0.0780306	0.0344851	2.26274	0.0236518	0.169748	Coding
Gm12704	7.38924	0.978184	0.432408	2.26218	0.0236866	0.169796	Predicted
Pde4b	294.089	0.290136	0.128291	2.26154	0.0237257	0.16999	Coding
Tnks	496.443	-0.164084	0.0725649	-2.26121	0.0237465	0.170054	Coding
Rdh10	626.848	-0.286978	0.126987	-2.2599	0.0238272	0.17046	Coding
Dnajc14	440.26	-0.175904	0.0778329	-2.26003	0.0238196	0.17046	Coding
Slc43a2	16.0136	0.713195	0.31587	2.25788	0.0239533	0.171276	Coding
Hmgb1-ps9	10.7822	0.869408	0.385205	2.257	0.0240078	0.171579	Noncoding
Acaa1a	360.25	0.179145	0.0793936	2.25641	0.0240449	0.171758	Coding
Pdss1	202.376	0.351397	0.155768	2.2559	0.0240768	0.171899	Coding
Exosc10	435.863	-0.158399	0.0702236	-2.25563	0.0240936	0.171933	Coding
Gm44705	24.7582	0.542568	0.240647	2.25462	0.0241569	0.172212	Predicted
Cd200r4	25.6839	0.818437	0.362976	2.2548	0.0241461	0.172212	Coding
Rnh1	4254.5	0.12396	0.0550028	2.2537	0.024215	0.172539	Coding
Ctsb	6879.01	0.162066	0.071931	2.25307	0.0242545	0.172734	Coding
Rps2	53105.1	-0.112931	0.0501306	-2.25273	0.0242759	0.1728	Ribosomal
Rbm12	232.132	-0.190553	0.0845969	-2.25249	0.0242915	0.172825	Coding
Patz1	108.084	-0.253941	0.112766	-2.25193	0.0243265	0.1729	Coding
[truncated: 16,073 more rows]

## Sheet: fibs_DEG_combo_vs_ctr
	baseMean	log2FoldChange	lfcSE	stat	pvalue	padj	type
Gm10260	4642.79	-0.795308	0.0477961	-16.6396	3.59986e-62	5.5787e-58	Predicted
Gm10076	2215.63	-0.843494	0.0594948	-14.1776	1.26084e-45	9.76963e-42	Predicted
Socs1	843.893	1.51545	0.125323	12.0924	1.15829e-33	5.98335e-30	Coding
Uba52	707.926	-0.917367	0.081549	-11.2493	2.33529e-29	9.04749e-26	Coding
Rpl27a	5247.83	-0.530604	0.0485579	-10.9273	8.53904e-28	2.64659e-24	Ribosomal
Rplp0-ps1	140.726	-1.32037	0.126611	-10.4286	1.83609e-25	4.74233e-22	Ribosomal
Rpl35a	2573.35	-0.582188	0.0576484	-10.0989	5.5844e-24	1.23631e-20	Ribosomal
Gm14303	427.389	0.730754	0.076373	9.56822	1.0876e-21	2.10681e-18	Predicted
mt-Co1	5136.01	0.379384	0.0397786	9.53739	1.46466e-21	2.52198e-18	Mitochondrial
Ms4a4d	896.466	0.706593	0.0742892	9.51138	1.88151e-21	2.91577e-18	Coding
Casp1	437.802	0.929454	0.0984084	9.44487	3.55849e-21	5.01327e-18	Coding
Gm4951	817.127	1.28407	0.14008	9.16673	4.87598e-20	6.29692e-17	Predicted
Rpl15	2853.67	-0.463468	0.0513642	-9.02316	1.82747e-19	2.17848e-16	Ribosomal
Gm6274	157.103	-0.938151	0.105187	-8.91886	4.71127e-19	5.21504e-16	Predicted
Gbp8	161.769	1.71183	0.193494	8.84692	8.99685e-19	9.29494e-16	Coding
Rpl7	8043.75	-0.474148	0.0538231	-8.80937	1.25852e-18	1.21895e-15	Ribosomal
Ube2l6	705.915	0.664333	0.0778408	8.5345	1.40757e-17	1.14806e-14	Coding
Wfdc2	136.894	1.00628	0.117785	8.54339	1.30337e-17	1.14806e-14	Coding
Rps6	3309.44	-0.585903	0.0686298	-8.53715	1.37571e-17	1.14806e-14	Ribosomal
Gpx4	2078.48	-0.411098	0.0485242	-8.47202	2.41182e-17	1.8688e-14	Coding
Snx10	477.837	0.873231	0.104858	8.32779	8.23677e-17	6.07835e-14	Coding
AW112010	1091.99	1.19685	0.143896	8.31744	8.98872e-17	6.33173e-14	Noncoding
Gbp2b	2193.23	1.74301	0.211611	8.23686	1.76796e-16	1.14159e-13	Coding
Ifi203	2150.55	0.869229	0.105517	8.23783	1.7536e-16	1.14159e-13	Coding
Gbp7	1430.36	1.20114	0.146122	8.22012	2.03294e-16	1.26018e-13	Coding
Tnfaip2	3579.33	0.975806	0.120825	8.0762	6.68185e-16	3.98264e-13	Coding
F830016B08Rik	658.67	0.900594	0.111841	8.05246	8.11496e-16	4.65768e-13	Coding
Xaf1	742.253	0.789784	0.0991203	7.96794	1.61342e-15	8.92968e-13	Coding
Gm43302	781.479	1.6668	0.209743	7.94689	1.91249e-15	1.02199e-12	Predicted
Txndc5	2827.56	-0.403663	0.0510733	-7.90359	2.70978e-15	1.39978e-12	Coding
Ifi207	608.699	1.01762	0.128879	7.89593	2.88151e-15	1.44047e-12	Coding
Gbp2	1706.07	1.42018	0.180772	7.85621	3.95919e-15	1.91736e-12	Coding
Gbp5	434.074	1.80665	0.231917	7.79007	6.69697e-15	3.14494e-12	Coding
Samhd1	1430	1.27778	0.165856	7.70416	1.31711e-14	6.00332e-12	Coding
Psme1	2711.1	0.938689	0.122145	7.68501	1.52983e-14	6.77363e-12	Coding
Ccdc85b	108.968	-1.21593	0.158862	-7.65396	1.94878e-14	8.38897e-12	Coding
Hist1h2ap	144.809	-2.03902	0.26883	-7.58478	3.33052e-14	1.39495e-11	Coding
Igtp	1669.84	1.60206	0.21195	7.55868	4.07169e-14	1.6537e-11	Coding
Batf2	135.582	1.74779	0.231317	7.55584	4.16172e-14	1.6537e-11	Coding
Hist1h2al	31.7557	-1.77591	0.235239	-7.54939	4.37311e-14	1.69425e-11	Noncoding
Rps3a2	1287.64	-0.508411	0.0674284	-7.54001	4.69919e-14	1.77618e-11	Ribosomal
Tmem140	476.531	0.67674	0.0899622	7.52249	5.37422e-14	1.98296e-11	Coding
Gdap10	120.223	1.14803	0.152683	7.51903	5.51824e-14	1.98875e-11	Noncoding
Herc6	167.692	1.11418	0.148352	7.51033	5.89773e-14	2.07721e-11	Coding
Psmb10	1843.98	0.971592	0.129441	7.50609	6.09206e-14	2.09797e-11	Coding
Gstp1	247.997	-0.918247	0.122529	-7.49413	6.67419e-14	2.24848e-11	Coding
Rpl39-ps	750.01	0.491542	0.0656681	7.48525	7.14129e-14	2.35465e-11	Ribosomal
Gbp3	943.284	1.37916	0.184511	7.47468	7.73934e-14	2.49868e-11	Coding
Stat1	1226.3	0.899358	0.120693	7.45159	9.22194e-14	2.91658e-11	Coding
Oasl2	638.497	0.727017	0.0976948	7.44171	9.93887e-14	3.08045e-11	Coding
Rtp4	986.981	0.821452	0.111446	7.37083	1.69573e-13	5.1527e-11	Coding
Tgtp2	122.356	1.48563	0.202157	7.34887	1.99887e-13	5.95701e-11	Coding
Irf2	460.284	0.568105	0.0773736	7.34236	2.09854e-13	6.13607e-11	Coding
Tpt1-ps3	898.335	-0.609214	0.0831911	-7.32307	2.42358e-13	6.95524e-11	Noncoding
Plac8	12704	0.614714	0.0842557	7.29582	2.9685e-13	8.36414e-11	Coding
Rnd3	844.465	0.867317	0.119192	7.27661	3.42324e-13	9.47322e-11	Coding
Irf1	1434.69	1.24358	0.171524	7.25019	4.16188e-13	1.13152e-10	Coding
Tapbp	2561.45	0.681454	0.0940396	7.24645	4.2783e-13	1.14312e-10	Coding
Gm12250	823.193	1.49517	0.206598	7.23708	4.58457e-13	1.20419e-10	Predicted
Fzd2	708.471	-0.494705	0.0684168	-7.23075	4.80322e-13	1.24059e-10	Coding
Iigp1	9819.98	1.30909	0.183617	7.12946	1.00761e-12	2.55982e-10	Coding
Gm5970	29.8346	1.72084	0.241623	7.12202	1.06358e-12	2.65844e-10	Predicted
Cxcl9	12770	1.53502	0.216563	7.08812	1.35947e-12	3.34408e-10	Coding
Gbp11	98.4667	1.9475	0.275146	7.07804	1.46207e-12	3.54026e-10	Coding
AC121965.1	1930.04	0.359909	0.0509796	7.05986	1.66669e-12	3.97365e-10	Noncoding
Draxin	189.747	0.988028	0.140574	7.02852	2.08737e-12	4.90121e-10	Coding
Ly6e	7885.14	0.541771	0.0773845	7.00104	2.54077e-12	5.72505e-10	Coding
Irgm2	600.022	1.14344	0.163257	7.00392	2.48895e-12	5.72505e-10	Coding
Fam26f	395.323	1.73748	0.24819	7.00058	2.54906e-12	5.72505e-10	Coding
Fam26e	114.116	1.1145	0.159788	6.97489	3.06104e-12	6.77672e-10	Coding
Ifitm3	37885.8	0.541849	0.0779427	6.95189	3.6042e-12	7.8668e-10	Coding
Rplp0	10693.3	-0.32725	0.0471597	-6.93919	3.94359e-12	8.48803e-10	Ribosomal
Rpl21	10470	-0.329117	0.0475993	-6.91432	4.70098e-12	9.9796e-10	Ribosomal
Igfbp2	50.5041	-3.01289	0.437374	-6.88858	5.63539e-12	1.16442e-09	Coding
Acod1	71.7713	2.768	0.401756	6.88974	5.58932e-12	1.16442e-09	Coding
Gbp10	44.2111	1.86203	0.271293	6.86353	6.71771e-12	1.36979e-09	Coding
Gm9625	93.1174	-0.909739	0.133473	-6.81593	9.36565e-12	1.88493e-09	Predicted
Parp14	462.847	0.86021	0.126948	6.77607	1.23486e-11	2.45342e-09	Coding
Ifi47	1478.55	1.18066	0.174873	6.7515	1.46327e-11	2.87042e-09	Coding
Gm28438	1003.16	-0.621554	0.0922103	-6.74061	1.57722e-11	3.05527e-09	Predicted
Casp12	559.981	0.630742	0.0937561	6.72748	1.72631e-11	3.30279e-09	Coding
Phf11d	586	0.711838	0.105887	6.72265	1.78446e-11	3.37242e-09	Coding
Nlrc5	106.885	1.19501	0.177925	6.71637	1.8631e-11	3.47862e-09	Coding
Idnk	613.255	0.563157	0.0839794	6.7059	2.00171e-11	3.69292e-09	Coding
H2-Ab1	2042.73	1.6233	0.242297	6.69964	2.08939e-11	3.80933e-09	Coding
Ifi203-ps	122.17	1.02958	0.153892	6.69026	2.22773e-11	4.01431e-09	Noncoding
Isg15	3533.8	0.639592	0.0963136	6.64073	3.12144e-11	5.5601e-09	Coding
Sp100	516.16	0.555901	0.0837894	6.6345	3.25606e-11	5.73399e-09	Coding
Rgs4	105.041	-1.45164	0.219295	-6.6196	3.60167e-11	6.27137e-09	Coding
Mndal	1849.59	0.754533	0.114209	6.6066	3.93244e-11	6.77122e-09	Coding
Gm12185	48.5939	2.03204	0.307773	6.60241	4.04515e-11	6.88875e-09	Predicted
Il18bp	487.028	1.61428	0.245978	6.5627	5.28421e-11	8.90102e-09	Coding
Gbp9	215.163	1.17504	0.18036	6.51496	7.2709e-11	1.21158e-08	Coding
Rac3	151.011	-0.947798	0.145596	-6.50979	7.52548e-11	1.24066e-08	Coding
Ubd	153.992	2.31031	0.355072	6.5066	7.68708e-11	1.25396e-08	Coding
Trim30a	802.117	0.786446	0.121949	6.44898	1.12602e-10	1.81706e-08	Coding
Enpp4	140.5	0.902079	0.139912	6.44747	1.13735e-10	1.81706e-08	Coding
Psme2b	82.8795	1.00962	0.15679	6.43935	1.19987e-10	1.86604e-08	Coding
Rpl23a	5096.76	0.291595	0.0452871	6.43881	1.20413e-10	1.86604e-08	Ribosomal
C2	1381.22	0.77262	0.119957	6.44079	1.18856e-10	1.86604e-08	Coding
Cspg4	45.0196	-1.99678	0.310808	-6.42448	1.32323e-10	2.03009e-08	Coding
Stat2	523.412	0.646081	0.100589	6.423	1.33619e-10	2.03009e-08	Coding
Gm10443	104.985	0.818739	0.128124	6.39023	1.65641e-10	2.49217e-08	Predicted
Tapbpl	216.879	0.760539	0.119054	6.38818	1.67868e-10	2.50139e-08	Coding
Rspo3	174.547	1.03864	0.162646	6.38589	1.70406e-10	2.51503e-08	Coding
Gm15987	356.387	1.49895	0.235726	6.35884	2.03282e-10	2.97194e-08	Predicted
Zfp395	137.854	-1.00291	0.15873	-6.31837	2.64336e-10	3.82843e-08	Coding
Trim12c	419.049	0.612393	0.0969526	6.31642	2.6769e-10	3.83663e-08	Coding
Tax1bp1	1612.25	0.2931	0.0464119	6.31518	2.69854e-10	3.83663e-08	Coding
Ddx60	192.096	0.726591	0.11527	6.30339	2.91199e-10	4.1019e-08	Coding
Ifitm1	583.301	1.21161	0.192258	6.30201	2.93806e-10	4.1019e-08	Coding
Tap1	1236.84	0.952489	0.15132	6.29455	3.08294e-10	4.26574e-08	Coding
Cda	66.1583	-1.83638	0.292447	-6.27935	3.39992e-10	4.6627e-08	Coding
Aldh1l2	135.551	-0.822201	0.131155	-6.26894	3.63506e-10	4.94145e-08	Coding
Rps29	28553.5	0.260424	0.0420908	6.1872	6.12425e-10	8.25283e-08	Ribosomal
Uba7	166.53	0.793524	0.128537	6.17352	6.6785e-10	8.92213e-08	Coding
Irf8	172.897	1.42087	0.230755	6.15749	7.39066e-10	9.78915e-08	Coding
Serpina3f	104.675	1.62206	0.263764	6.14969	7.76366e-10	1.01961e-07	Coding
Wnt9a	100.522	-1.42584	0.232333	-6.13708	8.4054e-10	1.07696e-07	Coding
Gbp4	2224.08	1.67649	0.273116	6.13836	8.33776e-10	1.07696e-07	Coding
Cthrc1	4936.55	-1.38267	0.225299	-6.13701	8.40883e-10	1.07696e-07	Coding
Lmo4	1314.79	0.657471	0.107652	6.10736	1.01294e-09	1.28669e-07	Coding
Sh3gl1	719.019	-0.394373	0.0650648	-6.06124	1.35077e-09	1.70187e-07	Coding
Col8a2	34.9584	-3.30509	0.546087	-6.05231	1.42782e-09	1.78443e-07	Coding
Mpeg1	122.783	1.62088	0.268081	6.04622	1.48286e-09	1.83839e-07	Coding
Gpr153	768.491	-0.39422	0.0652777	-6.03912	1.54958e-09	1.90586e-07	Coding
Bst2	6163.65	0.724915	0.120336	6.02409	1.70067e-09	2.07522e-07	Coding
Xdh	563.942	0.732362	0.121694	6.01807	1.76506e-09	2.13696e-07	Coding
Lrrc15	1042.01	-1.24078	0.206528	-6.0078	1.88062e-09	2.25922e-07	Coding
1810022K09Rik	277.996	0.508732	0.0852856	5.96504	2.4458e-09	2.91558e-07	Coding
Tspan18	52.3169	-1.4976	0.252035	-5.94202	2.81531e-09	3.33044e-07	Coding
Gm8995	106.748	1.78471	0.300715	5.93489	2.94037e-09	3.45204e-07	Predicted
mt-Atp6	457.085	0.446863	0.0756832	5.90439	3.53964e-09	4.12434e-07	Mitochondrial
Cd274	174.521	1.66159	0.281758	5.89723	3.6965e-09	4.27497e-07	Coding
Apol6	322.764	1.32495	0.224743	5.89538	3.73815e-09	4.29112e-07	Coding
Gm44440	153.062	0.748004	0.127337	5.87422	4.24846e-09	4.84106e-07	Predicted
Gm9294	241.757	-0.554279	0.0943905	-5.87219	4.30069e-09	4.8648e-07	Predicted
Psmb8	5208.48	0.866213	0.147695	5.86488	4.49471e-09	5.04743e-07	Coding
Tifa	119.452	0.795353	0.135863	5.85407	4.7969e-09	5.34802e-07	Coding
Plcb1	242.503	0.76834	0.131875	5.82627	5.66787e-09	6.27393e-07	Coding
Sh3bp5	379.608	0.781646	0.134302	5.82005	5.88288e-09	6.46574e-07	Coding
Parp10	154.664	0.618489	0.10651	5.80687	6.36519e-09	6.94657e-07	Coding
Psme2	2473.96	0.733457	0.126436	5.801	6.59199e-09	7.14378e-07	Coding
Sp140	493.227	0.834849	0.144015	5.79694	6.75351e-09	7.26799e-07	Coding
Dkk2	52.714	-1.88322	0.32615	-5.77408	7.73733e-09	8.26934e-07	Coding
Fas	412.033	0.782174	0.135613	5.76769	8.03631e-09	8.53005e-07	Coding
Trabd2b	131.096	-1.28688	0.224029	-5.74426	9.23257e-09	9.73314e-07	Coding
Ccdc80	4501.59	-0.560109	0.0975465	-5.74197	9.35799e-09	9.79871e-07	Coding
Gm38257	79.3122	0.846619	0.148005	5.7202	1.06398e-08	1.10661e-06	Predicted
Gm13611	385.574	0.445483	0.0784041	5.68188	1.33223e-08	1.37637e-06	Predicted
Rps6-ps4	231.328	-0.577315	0.102336	-5.64135	1.68726e-08	1.73162e-06	Ribosomal
Polr2l	1420.75	0.442854	0.0786101	5.63354	1.76544e-08	1.79994e-06	Coding
Kdelr3	2302.53	-0.371762	0.0661142	-5.62303	1.87636e-08	1.90052e-06	Coding
Vwa1	152.889	-1.69633	0.301825	-5.62023	1.90704e-08	1.91906e-06	Coding
Hivep3	183.241	0.590275	0.105086	5.61705	1.94248e-08	1.94211e-06	Coding
Sp110	267.694	0.922013	0.164982	5.58859	2.28926e-08	2.27415e-06	Coding
F2r	628.145	-0.812645	0.145535	-5.58383	2.35275e-08	2.32233e-06	Coding
Wars	291.183	0.819038	0.14697	5.57281	2.50663e-08	2.45856e-06	Coding
Psmb9	1966.44	1.05735	0.189825	5.57014	2.54535e-08	2.46533e-06	Coding
Wnt11	34.7315	-1.50286	0.269787	-5.57053	2.53967e-08	2.46533e-06	Coding
B2m	35546.8	0.774336	0.139081	5.56752	2.58392e-08	2.48715e-06	Coding
Upp1	126.581	1.54436	0.277601	5.56323	2.64834e-08	2.53341e-06	Coding
Irf7	1254.93	0.749226	0.134965	5.55125	2.83627e-08	2.69654e-06	Coding
Rnf213	472.556	0.626505	0.113002	5.54419	2.95311e-08	2.79051e-06	Coding
Il15ra	770.021	0.50155	0.0904997	5.542	2.99031e-08	2.80853e-06	Coding
P4hb	5775.32	-0.476313	0.08601	-5.53788	3.06158e-08	2.85815e-06	Coding
Rpl30	5236.82	0.249896	0.0451809	5.53102	3.18374e-08	2.9544e-06	Ribosomal
Rab31	412.488	-0.51985	0.0941969	-5.51876	3.41395e-08	3.14917e-06	Coding
Mogs	335.455	-0.489944	0.0888251	-5.51583	3.47131e-08	3.18313e-06	Coding
Postn	12093.5	-0.915088	0.166092	-5.50951	3.59826e-08	3.28013e-06	Coding
Cxcr6	11.3573	-4.25252	0.773769	-5.49585	3.8884e-08	3.52389e-06	Coding
Ltbp2	835.66	-0.861158	0.157487	-5.46812	4.54827e-08	4.09794e-06	Coding
Tgtp1	33.5021	1.61194	0.295043	5.46341	4.67084e-08	4.18405e-06	Coding
Agtrap	436.599	0.475682	0.0871681	5.45706	4.84073e-08	4.31131e-06	Coding
H2-T22	1047.6	0.787614	0.144357	5.45603	4.86901e-08	4.31172e-06	Coding
Psmg4	813.594	0.483963	0.0888961	5.44414	5.20557e-08	4.58356e-06	Coding
Slc39a1	1057.19	-0.299193	0.0550495	-5.43498	5.48033e-08	4.79823e-06	Coding
Hpx	18.2445	2.3273	0.429231	5.42203	5.89258e-08	5.13019e-06	Coding
Gbp6	27.1435	1.4949	0.276285	5.4107	6.2779e-08	5.43512e-06	Coding
Pycard	634.723	1.24559	0.230555	5.40258	6.56895e-08	5.65551e-06	Coding
Ifi35	474.287	0.660864	0.122384	5.39991	6.66743e-08	5.70857e-06	Coding
Gm38070	189.719	0.591336	0.109605	5.39515	6.84671e-08	5.82986e-06	Predicted
Mlkl	386	0.652031	0.121076	5.38529	7.23275e-08	6.12491e-06	Coding
Gm8430	520.636	0.367797	0.06847	5.37165	7.80209e-08	6.57114e-06	Predicted
Palld	1659.02	-0.644393	0.120185	-5.36169	8.24473e-08	6.90641e-06	Coding
Sec61g	895.507	-0.44293	0.0827726	-5.35117	8.73854e-08	7.28071e-06	Coding
Emilin1	1270.72	-0.623114	0.116755	-5.33695	9.45211e-08	7.83312e-06	Coding
H2-DMa	396.866	2.1313	0.399433	5.33582	9.51132e-08	7.84026e-06	Coding
Pmepa1	7133.87	-0.633499	0.119071	-5.32036	1.0356e-07	8.49134e-06	Coding
Phf11b	246.541	1.06451	0.20033	5.31377	1.07382e-07	8.75393e-06	Coding
Gstt1	298.19	0.635109	0.119541	5.3129	1.07892e-07	8.75393e-06	Coding
Adam12	1033.22	-0.453211	0.0854361	-5.30468	1.12871e-07	9.11023e-06	Coding
Ifit1	999.628	0.776507	0.14678	5.29027	1.22135e-07	9.80684e-06	Coding
Hgf	153.963	0.587397	0.111092	5.28747	1.24019e-07	9.856e-06	Coding
Ly6a	37434.7	0.849376	0.160628	5.28783	1.23777e-07	9.856e-06	Coding
AC160029.2	25.207	-1.66379	0.315057	-5.28092	1.28535e-07	1.01628e-05	Noncoding
Usmg5	2252.81	0.348025	0.0661149	5.26394	1.40998e-07	1.10916e-05	Coding
Ccl8	8212.63	1.0912	0.207524	5.25816	1.45504e-07	1.13485e-05	Coding
Fkbp10	1583.48	-0.448385	0.0852788	-5.25788	1.45728e-07	1.13485e-05	Coding
Sod2	6705.05	0.810597	0.154433	5.24884	1.53059e-07	1.18597e-05	Coding
Anapc5	960.943	-0.33238	0.0633444	-5.2472	1.54432e-07	1.19066e-05	Coding
Wdr89	1018.79	0.303373	0.0578814	5.24128	1.59463e-07	1.22337e-05	Coding
Tmbim4	1134.64	0.441093	0.0843418	5.22982	1.69675e-07	1.2953e-05	Coding
Ggct	404.832	0.937599	0.180394	5.19751	2.01971e-07	1.53429e-05	Coding
Defb25	28.2163	1.20528	0.232257	5.18944	2.10931e-07	1.59453e-05	Coding
Rpl35	10874.2	-0.177737	0.0343261	-5.17789	2.24403e-07	1.68815e-05	Ribosomal
Hsd11b1	530.205	0.770673	0.149014	5.17181	2.31832e-07	1.7356e-05	Coding
Ndrg2	174.417	-1.20718	0.233507	-5.16979	2.34363e-07	1.74611e-05	Coding
Casp4	490.667	0.678249	0.131354	5.16352	2.42345e-07	1.79695e-05	Coding
Rcan1	851.81	-0.931411	0.180418	-5.16251	2.43654e-07	1.79805e-05	Coding
Gm4070	36.972	1.23969	0.241018	5.14354	2.69606e-07	1.98013e-05	Predicted
Ctxn1	223.599	-0.991906	0.192945	-5.14088	2.73459e-07	1.99896e-05	Coding
Cotl1	500.87	-0.440324	0.0857481	-5.13509	2.82013e-07	2.05181e-05	Coding
Prr9	56.7838	-4.54583	0.886084	-5.13025	2.89361e-07	2.09543e-05	Coding
H2-Eb1	885.886	2.3224	0.452883	5.12804	2.9278e-07	2.11033e-05	Coding
Irgm1	1049.69	0.912695	0.178081	5.12517	2.97263e-07	2.13273e-05	Coding
Anp32a	923.795	-0.41158	0.0803266	-5.12383	2.99384e-07	2.13804e-05	Coding
Csrp2	5612.52	-0.652391	0.127485	-5.11741	3.09764e-07	2.20202e-05	Coding
Phlda1	4781.02	0.667146	0.130417	5.11546	3.12973e-07	2.21468e-05	Coding
C130026I21Rik	46.7924	1.15676	0.22621	5.11365	3.15997e-07	2.22591e-05	Coding
Grem1	831.683	0.940168	0.184061	5.10793	3.25712e-07	2.28396e-05	Coding
Rps10-ps1	334.23	0.403176	0.0789482	5.10685	3.2758e-07	2.28671e-05	Ribosomal
Trim21	67.6073	0.965858	0.189164	5.10592	3.29184e-07	2.28761e-05	Coding
Gm29101	179.138	1.09567	0.214735	5.10245	3.35277e-07	2.31669e-05	Predicted
Cd74	3325.72	2.26976	0.44489	5.10184	3.36359e-07	2.31669e-05	Coding
Tnfsf18	12.2777	-3.75321	0.736227	-5.0979	3.43445e-07	2.35503e-05	Coding
Ifit3	340.849	0.726031	0.142747	5.08614	3.65419e-07	2.49467e-05	Coding
Rps25	6855.11	-0.248793	0.0490602	-5.07118	3.95351e-07	2.68717e-05	Ribosomal
Tap2	793.7	0.643968	0.127031	5.06938	3.99107e-07	2.70086e-05	Coding
Cxcl11	284.611	1.42061	0.280713	5.06073	4.17652e-07	2.81406e-05	Coding
H2-M3	480.569	0.58367	0.115422	5.05682	4.26312e-07	2.85998e-05	Coding
2210408F21Rik	84.3531	0.729343	0.144672	5.04137	4.62218e-07	3.08749e-05	Noncoding
Pet100	533.455	0.395326	0.0785076	5.03551	4.76582e-07	3.16978e-05	Coding
Zbp1	2364.25	0.763722	0.152013	5.02406	5.05893e-07	3.35035e-05	Coding
H2-Aa	787.477	2.34139	0.466578	5.01821	5.21539e-07	3.43927e-05	Coding
Gm4841	167.723	1.12097	0.223552	5.01436	5.32095e-07	3.49401e-05	Predicted
Rpl41	49295.7	0.275782	0.0550698	5.00787	5.50362e-07	3.59872e-05	Ribosomal
Aqp2	14.3916	-3.52741	0.70462	-5.00612	5.55384e-07	3.6163e-05	Coding
P3h4	808.657	-0.420192	0.0843836	-4.97955	6.37338e-07	4.13256e-05	Coding
H2-D1	43936.5	0.699088	0.140656	4.97021	6.68812e-07	4.31858e-05	Coding
Serpina3g	1243.26	0.980355	0.197311	4.96858	6.74434e-07	4.3368e-05	Coding
Krt8	154.123	0.699754	0.141124	4.95843	7.10666e-07	4.55091e-05	Coding
C1s1	4020.68	0.87634	0.176769	4.95754	7.13895e-07	4.55277e-05	Coding
Arhgef40	374.589	-0.659942	0.133216	-4.95392	7.27337e-07	4.61948e-05	Coding
Lysmd2	672.695	0.50389	0.101794	4.95008	7.41819e-07	4.65903e-05	Coding
Rflnb	202.704	-1.24411	0.25134	-4.94988	7.42583e-07	4.65903e-05	Coding
Cyb5a	3286.55	0.555648	0.112246	4.95027	7.41113e-07	4.65903e-05	Coding
Vwa5a	698.818	0.436244	0.0882841	4.94136	7.75778e-07	4.84767e-05	Coding
Serpina3i	72.1663	0.816872	0.165379	4.93939	7.8366e-07	4.87726e-05	Coding
Rnf152	23.4266	-1.64933	0.334899	-4.92485	8.44249e-07	5.23333e-05	Coding
Ifi44	453.143	0.75974	0.154548	4.91588	8.8385e-07	5.45698e-05	Coding
Sdhd	860.798	-0.29371	0.0598017	-4.91139	9.04323e-07	5.56123e-05	Coding
Ppfibp1	806.31	-0.324204	0.066077	-4.90646	9.27363e-07	5.68037e-05	Coding
Tfec	62.0654	1.65735	0.339299	4.88464	1.03617e-06	6.32186e-05	Coding
Rnf149	433.873	-0.758466	0.155455	-4.879	1.06623e-06	6.47975e-05	Coding
Chchd2	6186.04	0.257486	0.0528048	4.87619	1.08154e-06	6.54712e-05	Coding
Tgfb3	179.438	-1.46004	0.300127	-4.86475	1.14601e-06	6.9104e-05	Coding
Polr2k	949.963	0.29383	0.0604783	4.85843	1.18319e-06	7.10692e-05	Coding
Fth1	61293.8	0.641193	0.132201	4.85014	1.23372e-06	7.38183e-05	Coding
Atox1	3731.12	0.232499	0.0480502	4.83866	1.30714e-06	7.7874e-05	Coding
H2-DMb2	51.6744	2.00661	0.41476	4.838	1.31155e-06	7.7874e-05	Coding
Tmsb4x	35218.5	-0.613302	0.126856	-4.83464	1.33385e-06	7.88959e-05	Coding
2010107E04Rik	2744.58	0.301119	0.0623349	4.83066	1.3608e-06	8.0184e-05	Coding
Ifi27l2a	10405.2	0.698885	0.144717	4.82933	1.36991e-06	8.04148e-05	Coding
Nub1	253.659	0.485022	0.100717	4.8157	1.46683e-06	8.57793e-05	Coding
Cd109	90.2065	-0.998494	0.20758	-4.81017	1.50803e-06	8.76847e-05	Coding
Scpep1	966.137	0.365041	0.075895	4.80981	1.51073e-06	8.76847e-05	Coding
Gm7609	30.1538	1.59859	0.33244	4.80867	1.5194e-06	8.78587e-05	Predicted
9930111J21Rik2	175.109	1.01096	0.210537	4.80183	1.57219e-06	9.05731e-05	Coding
Obsl1	77.4575	-0.68738	0.143355	-4.79496	1.62708e-06	9.33882e-05	Coding
Mir6236	139.124	-0.77363	0.16151	-4.78997	1.66804e-06	9.53858e-05	Noncoding
Erh	673.519	-0.607703	0.127199	-4.77759	1.77407e-06	0.000101077	Coding
AC123720.1	81.6169	0.862752	0.181225	4.76066	1.92963e-06	0.000109137	Noncoding
Ifih1	336.151	0.550842	0.115693	4.76123	1.92421e-06	0.000109137	Coding
Olfr56	16.0291	1.57783	0.331976	4.75284	2.00575e-06	0.00011303	Coding
Bhlhe40	694.694	-0.517709	0.10905	-4.74743	2.0602e-06	0.000115677	Coding
H2-K1	26872.5	0.64881	0.137391	4.72235	2.33132e-06	0.000130428	Coding
Arf5	4916.01	-0.327701	0.0696828	-4.70275	2.56678e-06	0.000143084	Coding
Tmem106a	251.714	0.509408	0.108389	4.69981	2.60409e-06	0.000144644	Coding
Dtx3l	59.7932	0.852509	0.181522	4.69646	2.6471e-06	0.000146508	Coding
Fgf7	1681.88	0.59107	0.125939	4.69331	2.68821e-06	0.000148253	Coding
Rps23-ps1	418.326	0.367834	0.0785659	4.68186	2.84288e-06	0.000155702	Ribosomal
Rbp4	959.927	-0.715167	0.152754	-4.68182	2.84337e-06	0.000155702	Ribosomal
Ddx24	1256.39	0.277038	0.0592756	4.67373	2.95774e-06	0.000161394	Coding
Btg3	196.142	-0.499711	0.106961	-4.6719	2.98423e-06	0.000162269	Coding
Arl4a	436.956	0.567028	0.121393	4.671	2.99737e-06	0.000162413	Coding
5330406M23Rik	94.9419	0.696339	0.14921	4.66684	3.05864e-06	0.000165156	Noncoding
Rasl12	64.1468	-0.944561	0.202759	-4.65853	3.18477e-06	0.000171369	Coding
Tmem119	705.656	-0.819302	0.175915	-4.65737	3.20279e-06	0.000171742	Coding
Slfn8	173.285	0.614457	0.132337	4.64313	3.43171e-06	0.000183383	Coding
Epsti1	90.1876	0.689077	0.148518	4.63968	3.48953e-06	0.000185833	Coding
Ifi205	359.245	0.925236	0.199523	4.63724	3.53088e-06	0.000187141	Coding
Parp3	352.925	0.371931	0.0802126	4.63681	3.53825e-06	0.000187141	Coding
Pafah1b3	652.693	-0.477191	0.102956	-4.63492	3.5708e-06	0.00018822	Coding
Malat1	204865	0.587089	0.126773	4.63102	3.63875e-06	0.000191152	Noncoding
Ly6c1	11031.7	0.845812	0.182721	4.62899	3.67459e-06	0.000192382	Coding
Unc93a	82.5687	1.05475	0.228405	4.6179	3.87638e-06	0.000202264	Coding
Slc39a2	9.38827	-2.71426	0.587927	-4.61666	3.89962e-06	0.000202793	Coding
Trafd1	325.519	0.466162	0.101179	4.6073	4.07937e-06	0.000211432	Coding
Bcl2l11	136.105	0.614441	0.133444	4.60449	4.13478e-06	0.000213589	Coding
Cxcl10	3896.43	1.67752	0.364427	4.60317	4.1611e-06	0.000214235	Coding
Car12	63.277	-1.37079	0.299075	-4.58342	4.57437e-06	0.000234732	Coding
Ltc4s	211.622	1.59924	0.349483	4.57602	4.73914e-06	0.000242384	Coding
Parp11	192.661	0.696461	0.152232	4.575	4.76218e-06	0.000242401	Coding
Serf2	4166.55	-0.295996	0.0647039	-4.57462	4.77076e-06	0.000242401	Coding
Rasl11b	106.111	-1.43463	0.313789	-4.57195	4.83195e-06	0.000244708	Coding
Dhx58	125.237	0.547433	0.119959	4.56352	5.03041e-06	0.000253929	Coding
Cox7a2	3819.61	0.217536	0.0476957	4.56092	5.09289e-06	0.000256249	Coding
Mcfd2	878.963	-0.336521	0.0740871	-4.54224	5.56597e-06	0.000279145	Coding
Lmf2	329.175	-0.372014	0.0822674	-4.52201	6.12555e-06	0.000306218	Coding
Slfn2	494.503	0.69878	0.154638	4.51882	6.21858e-06	0.000309869	Coding
Hnrnpa0	2480.98	-0.262568	0.0581456	-4.51569	6.31109e-06	0.000313005	Coding
Wfdc17	106.204	0.75027	0.166161	4.51533	6.3219e-06	0.000313005	Coding
Susd6	806.44	0.365441	0.0809678	4.51341	6.37926e-06	0.000314839	Coding
AC153379.1	18.2913	-2.11468	0.469183	-4.50716	6.57024e-06	0.000323235	Noncoding
Col5a1	7660.04	-0.427585	0.0949147	-4.50494	6.63917e-06	0.000325593	Coding
Smtnl2	13.4093	-2.30279	0.511426	-4.50269	6.70998e-06	0.000328027	Coding
Nampt	607.367	0.531132	0.118093	4.49758	6.8732e-06	0.00033495	Coding
Mrc2	1120.21	-0.518561	0.116064	-4.46788	7.89984e-06	0.00038257	Coding
Plod2	1844.9	-0.623825	0.139647	-4.46717	7.92618e-06	0.00038257	Coding
Tmem132a	117.906	-0.583606	0.130662	-4.46655	7.94912e-06	0.00038257	Coding
Pcsk5	1784.75	-0.540771	0.121033	-4.46796	7.89682e-06	0.00038257	Coding
Ccnd1	266.482	1.07028	0.239904	4.46128	8.14704e-06	0.000390881	Coding
Pomp	2597.79	0.283603	0.0636571	4.45516	8.38297e-06	0.000400959	Coding
Serpinb9b	327.689	1.46779	0.329588	4.45341	8.4518e-06	0.000403008	Coding
Rprml	27.7753	-1.32737	0.298402	-4.44828	8.65621e-06	0.000411489	Coding
Rnf115	338.071	0.340337	0.0766054	4.44273	8.88247e-06	0.000420953	Coding
Mitd1	422.756	0.520165	0.11715	4.44015	8.98947e-06	0.000424725	Coding
Ndufa3	1523.74	0.300435	0.0677028	4.43756	9.09848e-06	0.000425979	Coding
Ndufa7	2223.32	0.245953	0.0554217	4.43784	9.08652e-06	0.000425979	Coding
Rps13-ps2	249.815	0.394063	0.0887987	4.43771	9.09203e-06	0.000425979	Ribosomal
Insl6	32.2945	0.952168	0.214715	4.43456	9.2259e-06	0.000430644	Coding
1500009L16Rik	159.016	0.680157	0.153777	4.423	9.73383e-06	0.000452988	Coding
Chl1	3270.74	0.510001	0.115351	4.4213	9.81095e-06	0.00045521	Coding
Tgm2	362.778	0.684869	0.155049	4.41713	1.00021e-05	0.000462693	Coding
Sppl2a	1011.55	0.397757	0.0900714	4.41601	1.00538e-05	0.0004637	Coding
Pxdn	743.655	-0.402225	0.0911939	-4.41065	1.03061e-05	0.000473927	Coding
Zfp809	137.723	0.538874	0.122371	4.4036	1.06468e-05	0.000488147	Coding
AI413582	259.91	0.627866	0.142729	4.39901	1.08746e-05	0.000497119	Coding
Erap1	442.211	0.616433	0.140315	4.39322	1.11686e-05	0.00050906	Coding
Pltp	384.52	0.839566	0.191187	4.39134	1.12655e-05	0.000511969	Coding
Snta1	199.589	-0.494919	0.113111	-4.37551	1.2115e-05	0.000548963	Coding
Fam114a2	568.019	-0.2757	0.0630583	-4.37215	1.23031e-05	0.000554246	Coding
A530032D15Rik	68.172	0.960451	0.219657	4.37251	1.22826e-05	0.000554246	Coding
5330416C01Rik	20.9559	-2.13596	0.489326	-4.36511	1.27062e-05	0.000568554	Noncoding
Tmed2	3898.6	-0.243558	0.0558147	-4.36369	1.27889e-05	0.000568554	Coding
Gm15500	1028	-0.301109	0.0689755	-4.36545	1.26859e-05	0.000568554	Predicted
Slc15a3	62.5733	0.751055	0.172125	4.36343	1.28041e-05	0.000568554	Coding
Nkd1	29.5979	-1.31718	0.301813	-4.36423	1.27573e-05	0.000568554	Coding
Crem	198.113	0.487492	0.111824	4.35945	1.30389e-05	0.000574538	Coding
Znfx1	139.925	0.674246	0.15467	4.35926	1.30501e-05	0.000574538	Coding
Arid5b	1180.23	0.336394	0.0771522	4.36014	1.29979e-05	0.000574538	Coding
Snrpert	65.4994	-0.700356	0.160714	-4.35778	1.3139e-05	0.000576814	Noncoding
Atp5g2	44.9236	-0.828335	0.190119	-4.35693	1.31902e-05	0.000577423	Coding
Pqlc1	213.843	-0.815527	0.187767	-4.34329	1.40363e-05	0.000612735	Coding
Rpl24	3979	0.239002	0.0550416	4.34221	1.41056e-05	0.000613006	Ribosomal
Mx2	82.3587	0.628819	0.144824	4.34196	1.41216e-05	0.000613006	Coding
Hsd17b10	834.661	-0.266521	0.061403	-4.34052	1.42148e-05	0.000615327	Coding
Mtch1	2975.88	-0.425567	0.0981637	-4.33528	1.45572e-05	0.000628394	Coding
Katna1	228.149	0.391819	0.0903961	4.33446	1.46116e-05	0.00062899	Coding
Lgals3bp	2957.85	0.455282	0.105163	4.32932	1.49572e-05	0.000642083	Coding
P3h3	1222.31	-0.339638	0.07866	-4.3178	1.57591e-05	0.000674636	Coding
Xpnpep1	624.188	-0.342662	0.079414	-4.31488	1.59691e-05	0.000681743	Coding
Gdf15	221.591	1.34076	0.31112	4.30945	1.63662e-05	0.000696776	Coding
Tsix	58.551	0.711988	0.165367	4.3055	1.66607e-05	0.00070544	Noncoding
Ntn1	104.118	0.824015	0.191362	4.30604	1.66202e-05	0.00070544	Coding
Igf2bp2	147.56	0.683979	0.15893	4.30363	1.68019e-05	0.00070755	Coding
Gucy1b2	3.71138	-5.10994	1.18725	-4.30403	1.67722e-05	0.00070755	Coding
Fmnl3	109.822	-0.610446	0.141869	-4.30287	1.68596e-05	0.000708058	Coding
Plpp3	5339.61	0.62754	0.145904	4.30106	1.69984e-05	0.000711957	Coding
Rpl13	22264.4	-0.199433	0.046464	-4.29221	1.76903e-05	0.00073894	Ribosomal
Peli1	425.357	0.419522	0.0977972	4.28971	1.78904e-05	0.000745289	Coding
Synm	43.7929	-0.906832	0.211516	-4.2873	1.80855e-05	0.000749229	Coding
Serpinb9	804.668	0.621715	0.145018	4.28716	1.80969e-05	0.000749229	Coding
Pxylp1	204.924	-0.513776	0.119852	-4.28676	1.813e-05	0.000749229	Coding
Eno1	3737.53	-0.903568	0.210855	-4.28526	1.82526e-05	0.000749654	Coding
Prkce	125.919	0.491498	0.114681	4.28578	1.82099e-05	0.000749654	Coding
Rpl3	15060.8	-0.218126	0.0509061	-4.28486	1.82854e-05	0.000749654	Ribosomal
Mov10	128.172	0.573347	0.133892	4.28215	1.85098e-05	0.00075486	Coding
Cxcl12	11984.1	0.614445	0.143471	4.28272	1.84623e-05	0.00075486	Coding
Pnp	2305.36	0.53096	0.124033	4.28079	1.86233e-05	0.00075682	Coding
Cdk2ap2	521.954	0.373834	0.0873362	4.2804	1.86556e-05	0.00075682	Coding
Gng12	2713.32	0.452726	0.105801	4.27905	1.87693e-05	0.000759446	Coding
Tomm7	2147.53	0.180841	0.0422786	4.27736	1.89121e-05	0.00076273	Coding
Slc48a1	422.427	0.423756	0.0990794	4.27693	1.89489e-05	0.00076273	Coding
Lancl3	7.60893	-2.63361	0.615867	-4.27626	1.90061e-05	0.00076305	Coding
Adora2b	496.49	0.863972	0.202199	4.27287	1.92972e-05	0.000772734	Coding
Serping1	24287.6	0.650422	0.15233	4.26983	1.95624e-05	0.000781335	Coding
Apol10b	251.062	0.887076	0.208022	4.26434	2.00495e-05	0.000798732	Coding
Ctgf	2323.73	-0.858268	0.201345	-4.26266	2.02004e-05	0.000802681	Coding
Samd9l	551.337	0.40197	0.094317	4.2619	2.02696e-05	0.000803371	Coding
Mmp9	122.519	-1.13262	0.265916	-4.25934	2.05033e-05	0.000810562	Coding
Gjb3	30.2694	-1.58881	0.373424	-4.25469	2.09337e-05	0.000825471	Coding
Arfip2	222.128	-0.498885	0.117282	-4.25372	2.10247e-05	0.000826954	Coding
Rpl19-ps11	444.157	0.29928	0.0703726	4.2528	2.11117e-05	0.000828273	Ribosomal
Ntan1	789.132	-0.232959	0.0548578	-4.2466	2.1704e-05	0.000849361	Coding
Gm3375	33.1567	-0.912107	0.214899	-4.24434	2.19236e-05	0.000855793	Predicted
6030419C18Rik	128.018	-0.656542	0.15472	-4.24342	2.20143e-05	0.000857174	Coding
Parp9	507.354	0.541932	0.127922	4.23643	2.27101e-05	0.000879846	Coding
Rps11-ps1	372.201	0.353205	0.0833724	4.23648	2.27054e-05	0.000879846	Ribosomal
1110038F14Rik	476.906	0.408362	0.0965428	4.22986	2.3384e-05	0.000903694	Coding
Syce2	171.627	-0.452851	0.107203	-4.22426	2.39729e-05	0.00092415	Coding
Cebpd	3107.95	0.618482	0.146575	4.21955	2.44791e-05	0.000941322	Coding
Tubb2b	625.631	-0.474112	0.112508	-4.21403	2.50858e-05	0.000962265	Coding
Pin4	332.68	0.370703	0.0880269	4.21125	2.53965e-05	0.000971777	Coding
Prune2	55.8675	1.05673	0.25112	4.20805	2.57582e-05	0.000983189	Coding
Sec61a1	1113.29	-0.256563	0.0609957	-4.20625	2.59645e-05	0.00098863	Coding
Slc38a10	1277.48	-0.293878	0.0698777	-4.20561	2.60379e-05	0.000988994	Coding
Olfr753-ps1	24.3178	1.86302	0.44422	4.19391	2.74184e-05	0.00103888	Coding
Scin	19.176	1.21778	0.290417	4.19319	2.75056e-05	0.00103964	Coding
Arg1	48.605	-2.03553	0.486381	-4.18504	2.85114e-05	0.00107243	Coding
Gjb5	113.839	-1.13065	0.27013	-4.18559	2.84428e-05	0.00107243	Coding
Cyp26b1	140.759	0.586026	0.140133	4.18192	2.8906e-05	0.00108202	Coding
Palmd	26.3048	1.32155	0.316014	4.18195	2.89023e-05	0.00108202	Coding
Col4a5	49.0697	-0.898155	0.214922	-4.17898	2.92821e-05	0.00109346	Coding
A530040E14Rik	21.1311	1.25684	0.300897	4.17698	2.954e-05	0.00110044	Noncoding
P3h1	1016.06	-0.437057	0.104659	-4.17603	2.96647e-05	0.00110243	Coding
Rps24-ps3	349.329	0.313143	0.0750988	4.16975	3.04932e-05	0.00113051	Ribosomal
H2-DMb1	218.891	2.19083	0.525588	4.16835	3.06815e-05	0.00113478	Coding
Ddb1	1852.09	-0.268332	0.0643863	-4.16753	3.0792e-05	0.00113615	Coding
Polr3g	22.226	-1.14852	0.275631	-4.16686	3.08821e-05	0.00113677	Coding
Dennd4a	243.547	-0.776986	0.186495	-4.16625	3.09655e-05	0.00113714	Coding
Cst6	15.6653	1.51234	0.363161	4.16438	3.122e-05	0.00114378	Coding
Eif4e3	243.76	0.5326	0.127961	4.16221	3.15188e-05	0.001152	Coding
Isca1	65.7992	-0.703353	0.16912	-4.15891	3.19771e-05	0.001166	Coding
Grina	509.199	0.525757	0.126522	4.15544	3.24655e-05	0.00118103	Coding
Cops9	1706.21	0.254166	0.0612246	4.15138	3.30479e-05	0.0011994	Coding
Tnip1	210.289	0.456639	0.11007	4.14862	3.34485e-05	0.0012111	Coding
Gopc	247.82	-0.417922	0.100771	-4.14724	3.36502e-05	0.00121556	Coding
Serpina3e-ps	16.1107	1.30774	0.315491	4.14509	3.39677e-05	0.00122418	Noncoding
3300005D01Rik	10.3963	1.54764	0.37369	4.1415	3.45037e-05	0.00124061	Noncoding
Abcc3	84.6844	1.11201	0.268653	4.13921	3.48497e-05	0.00124713	Coding
Tro	21.3916	-1.43709	0.347233	-4.13871	3.49264e-05	0.00124713	Coding
Sod1	709.201	0.263639	0.0636947	4.1391	3.48667e-05	0.00124713	Coding
Cybb	6.89119	2.15632	0.521697	4.13329	3.57613e-05	0.00127109	Coding
H2-T23	1969.47	0.539977	0.13063	4.13363	3.57081e-05	0.00127109	Coding
Tmem263	1166.27	-0.257656	0.062349	-4.13248	3.58871e-05	0.00127264	Coding
Cox17	516.948	0.333715	0.0808522	4.12747	3.6677e-05	0.00129768	Coding
Irf9	303.611	0.398376	0.0965653	4.12545	3.70003e-05	0.00130614	Coding
Sipa1l1	319	0.713763	0.173207	4.12087	3.77438e-05	0.00132935	Coding
Rpl37rt	725.633	0.290276	0.0705379	4.11517	3.86891e-05	0.00135956	Ribosomal
Srpx2	1249.05	-0.560908	0.136349	-4.11376	3.89261e-05	0.00136479	Coding
Eno1b	40.6363	-0.970737	0.236342	-4.10735	4.00231e-05	0.00140008	Coding
Ostf1	2284.42	-0.368165	0.0897361	-4.10275	4.08269e-05	0.00142499	Coding
Ncln	481.005	-0.300189	0.0733421	-4.09299	4.25839e-05	0.00148297	Coding
Acaa1a	275.456	0.369321	0.0902476	4.09231	4.27094e-05	0.00148401	Coding
Tmem256	1501.28	0.19965	0.0488179	4.08969	4.31957e-05	0.00149755	Coding
Tmtc4	94.0971	-0.541611	0.132454	-4.08905	4.33148e-05	0.00149832	Coding
Mob3c	137.318	0.566368	0.138553	4.08775	4.35573e-05	0.00150336	Coding
Dchs1	124.738	-0.629647	0.15426	-4.08172	4.47029e-05	0.00153947	Coding
Rpp21	469.768	0.347207	0.0850959	4.08019	4.49988e-05	0.00154622	Coding
Ttl	151.524	-0.423292	0.103835	-4.07659	4.57008e-05	0.00156687	Coding
Pusl1	47.2656	-0.824211	0.203031	-4.05953	4.91722e-05	0.00168217	Coding
1810037I17Rik	2187.09	0.215274	0.053082	4.0555	5.00276e-05	0.00170766	Coding
Srgn	972.956	0.973864	0.240208	4.05424	5.02967e-05	0.00171307	Coding
Fam57a	87.0437	-0.701743	0.173132	-4.05323	5.05159e-05	0.00171676	Coding
Rest	520.344	-0.298473	0.0737563	-4.04675	5.19339e-05	0.00176109	Coding
Dio2	114.921	1.2011	0.297184	4.04159	5.30894e-05	0.00179635	Coding
Cacna1h	24.6187	1.12135	0.277575	4.03981	5.34946e-05	0.00180611	Coding
Rpl18-ps2	343.976	-0.340146	0.0843936	-4.03047	5.56656e-05	0.00187533	Ribosomal
Nr4a3	126.171	-0.962509	0.238864	-4.02953	5.5888e-05	0.00187873	Coding
Pgrmc1	1210.03	-0.247915	0.0616312	-4.02255	5.75703e-05	0.00192855	Coding
Espn	8.73693	-2.48048	0.616674	-4.02236	5.76189e-05	0.00192855	Coding
Adcyap1r1	83.2109	-0.905509	0.225668	-4.01257	6.00604e-05	0.00200594	Coding
Cbfb	549.43	-0.355737	0.0888186	-4.00521	6.19628e-05	0.00206503	Coding
Fgf21	33.986	-2.01746	0.504383	-3.99986	6.33812e-05	0.00210776	Coding
Tlr3	106.481	0.663633	0.166061	3.99631	6.43361e-05	0.00213494	Coding
Rpl34-ps1	566.815	0.28975	0.0725457	3.99403	6.4959e-05	0.002151	Ribosomal
AW011738	54.1561	0.708367	0.177632	3.98784	6.66785e-05	0.00220323	Coding
Rpl38-ps2	125.714	0.50133	0.125787	3.98556	6.73206e-05	0.00221501	Ribosomal
Ndufa11	2150.51	0.197646	0.0495866	3.98588	6.72316e-05	0.00221501	Coding
Mrpl13	1180.29	0.299376	0.0751568	3.98335	6.79516e-05	0.00223103	Coding
Dact1	443.17	0.456346	0.114704	3.97847	6.93594e-05	0.00227053	Coding
Thbs2	5216.98	-0.541091	0.136015	-3.97817	6.94476e-05	0.00227053	Coding
Rab33a	30.9585	-1.06562	0.267991	-3.97632	6.99897e-05	0.00228343	Coding
Zdhhc16	239.705	-0.412722	0.103851	-3.97419	7.06206e-05	0.00229918	Coding
Gm43581	28.7564	0.918357	0.231226	3.97169	7.13651e-05	0.00231854	Predicted
Plscr1	265.248	0.510601	0.128645	3.96907	7.21535e-05	0.00233925	Coding
Grn	2506.34	0.417571	0.105227	3.96828	7.23946e-05	0.00234217	Coding
S100a6	51857.5	0.29223	0.0736615	3.9672	7.27233e-05	0.0023479	Coding
Clca3a1	26.4477	1.08516	0.273607	3.96612	7.30533e-05	0.00235365	Coding
Pla1a	2888.99	0.682236	0.172115	3.96383	7.3757e-05	0.00237139	Coding
Nmt1	565.333	0.3779	0.095388	3.96171	7.44136e-05	0.00238755	Coding
Nsa2	2106.37	0.247641	0.0625179	3.96113	7.4597e-05	0.00238849	Coding
Aldh1l1	91.5868	0.569005	0.144002	3.95136	7.77076e-05	0.00247785	Coding
Nnmt	1064.26	0.386881	0.097905	3.9516	7.76311e-05	0.00247785	Coding
Fhod3	18.8105	-1.91096	0.483716	-3.95059	7.79597e-05	0.00248078	Coding
Gm8730	5807.24	-0.231933	0.0587231	-3.9496	7.82803e-05	0.00248588	Predicted
Grcc10	53.2342	-0.820676	0.208118	-3.94331	8.03642e-05	0.00254684	Coding
Plau	709.047	-0.677687	0.171903	-3.94226	8.07173e-05	0.00255281	Coding
Gm7776	12.108	1.44348	0.366314	3.94054	8.12984e-05	0.00256382	Predicted
Col5a2	17941.9	-0.331477	0.0841259	-3.94025	8.13964e-05	0.00256382	Coding
AC151846.1	72.7006	0.704048	0.178813	3.93735	8.23864e-05	0.0025872	Noncoding
Rpl18	10566.3	-0.187454	0.0476122	-3.9371	8.24726e-05	0.0025872	Ribosomal
Zeb2	1354.64	0.32603	0.0829052	3.93257	8.4044e-05	0.00263117	Coding
Ebf1	3724.07	0.443385	0.112971	3.92476	8.68166e-05	0.00271249	Coding
Phyh	503.015	0.400197	0.102051	3.92154	8.79865e-05	0.00274351	Coding
Gm4742	81.3772	-0.575597	0.146971	-3.91641	8.9878e-05	0.00279687	Predicted
Nat8f1	51.1403	0.844275	0.21567	3.91465	9.05348e-05	0.00281166	Coding
Nqo1	42.0719	1.14398	0.292291	3.91385	9.08344e-05	0.00281532	Coding
Arfgap2	183.605	-0.371232	0.0949194	-3.91102	9.19064e-05	0.00284286	Coding
Gm12840	2198.58	0.893386	0.22857	3.90858	9.28398e-05	0.00286601	Predicted
Abhd17a	686.206	-0.229455	0.0587548	-3.90529	9.41133e-05	0.00289955	Coding
Runx2	265.058	-0.593477	0.1522	-3.89932	9.64618e-05	0.00296601	Coding
Col8a1	2137.82	-0.936853	0.240508	-3.8953	9.8076e-05	0.00300967	Coding
Taf1d	535.602	0.356143	0.091497	3.8924	9.92587e-05	0.0030161	Coding
Fabp5	1196.75	-1.02699	0.263821	-3.89277	9.91072e-05	0.0030161	Coding
Nod1	217.204	0.490591	0.126012	3.8932	9.893e-05	0.0030161	Coding
Mrpl52	3191.25	0.217512	0.0558555	3.89419	9.85267e-05	0.0030161	Coding
Ncor2	333.878	-0.39637	0.10181	-3.89324	9.8915e-05	0.0030161	Coding
Ydjc	110.764	-0.551756	0.141876	-3.88901	0.000100654	0.0030525	Coding
Parp12	390.598	0.651904	0.16768	3.88779	0.000101159	0.00305861	Coding
Gm42679	236.723	1.28747	0.331175	3.88758	0.00010125	0.00305861	Predicted
Rps18	10748.4	-0.171641	0.0441823	-3.88483	0.0001024	0.00308136	Ribosomal
Gm7332	52.664	-0.849576	0.218677	-3.88507	0.000102299	0.00308136	Predicted
Nrg1	127.788	-1.07349	0.276449	-3.88313	0.000103121	0.00309702	Coding
Srp19	1661.85	0.196855	0.0507418	3.87954	0.000104652	0.00313217	Coding
Fam117b	158.871	-0.821816	0.211864	-3.87897	0.000104898	0.00313217	Coding
Plekho1	228.539	-0.410377	0.105795	-3.879	0.000104888	0.00313217	Coding
Cavin2	574.758	0.972855	0.250973	3.87634	0.000106039	0.00316017	Coding
Slc10a6	181.004	0.711638	0.183692	3.87409	0.000107024	0.0031834	Coding
H3f3b	14178.5	0.369776	0.0955172	3.8713	0.000108258	0.00320778	Coding
Bcl3	356.576	0.448655	0.115891	3.87135	0.000108233	0.00320778	Coding
Vcam1	1821.06	0.484948	0.125323	3.86958	0.000109023	0.00322429	Coding
Stc2	75.5914	-1.08039	0.279351	-3.8675	0.000109958	0.00324575	Coding
Arl5b	356.942	0.636663	0.164661	3.8665	0.00011041	0.00325227	Coding
Snrnp27	754.131	0.250655	0.064842	3.86563	0.000110803	0.00325227	Coding
Pir	161.045	0.525837	0.136029	3.86562	0.000110808	0.00325227	Coding
Srsf9	1078.2	-0.302398	0.0784728	-3.85354	0.000116421	0.00341054	Coding
Slco3a1	448.901	0.516767	0.134191	3.85098	0.000117644	0.00343987	Coding
AC125487.1	141.671	1.0267	0.266651	3.85034	0.000117952	0.00344238	Noncoding
H2-Ea-ps	9.76117	1.56228	0.406084	3.84719	0.000119482	0.00348046	Noncoding
Rassf4	12.5776	1.37051	0.356316	3.84634	0.000119897	0.00348602	Coding
Oas3	73.6345	1.66464	0.434155	3.83421	0.000125967	0.00365565	Coding
Mgat2	1168.92	-0.216692	0.0565236	-3.83365	0.000126253	0.0036571	Coding
Tbca	3055.26	0.163778	0.0427376	3.83217	0.000127017	0.00366553	Coding
Gadd45a	315.897	0.55283	0.14426	3.83218	0.000127015	0.00366553	Coding
Selenbp1	209.005	-0.915502	0.238977	-3.83092	0.000127664	0.00367733	Coding
Dnaja1	2826.69	0.478515	0.125035	3.82704	0.000129692	0.00372726	Coding
Ndufa2	3570.12	0.212596	0.0555561	3.82669	0.000129878	0.00372726	Coding
Car9	36.2961	-2.05531	0.537887	-3.82109	0.000132865	0.00380594	Coding
Nkd2	112.013	-1.00867	0.26426	-3.81695	0.00013511	0.00386311	Coding
Bid	79.918	0.645476	0.169306	3.81249	0.000137575	0.00392045	Coding
Ociad2	349.748	-0.472439	0.123922	-3.8124	0.000137622	0.00392045	Coding
Ptgir	64.0512	0.729655	0.191519	3.80983	0.000139062	0.00395422	Coding
Adamts4	495.278	-0.440423	0.115663	-3.8078	0.000140208	0.0039795	Coding
Grb10	760.102	-0.599448	0.157517	-3.8056	0.00014146	0.00400769	Coding
Comp	6.00693	-4.62021	1.2146	-3.80389	0.000142442	0.00402815	Coding
mt-Co2	73.9305	0.535725	0.140855	3.80338	0.000142737	0.00402914	Mitochondrial
Asb13	70.1532	0.561156	0.147634	3.80101	0.00014411	0.00406051	Coding
Ccdc8	126.816	-0.503848	0.132594	-3.79994	0.000144729	0.00407054	Coding
Serinc2	46.2874	-1.43863	0.378899	-3.79688	0.000146531	0.00410633	Coding
Hspb1	6897.76	0.580828	0.152966	3.79712	0.000146389	0.00410633	Coding
Mdfi	49.4274	-0.805407	0.212248	-3.79464	0.000147856	0.00413596	Coding
Acot7	184.72	-0.484292	0.127658	-3.79368	0.000148432	0.00414461	Coding
Ifitm2	13387.7	0.233516	0.0615622	3.79317	0.000148734	0.00414557	Coding
Col7a1	227.933	-0.692087	0.182541	-3.7914	0.0001498	0.00416778	Coding
Fam19a2	19.7184	-1.99297	0.525812	-3.79027	0.000150486	0.00417935	Coding
Ndufc1	2154.17	0.271184	0.0715819	3.78844	0.000151594	0.00419509	Coding
Sdf2l1	463.542	0.438436	0.11572	3.78875	0.000151405	0.00419509	Coding
Shc4	44.3781	-1.17462	0.310254	-3.78599	0.000153097	0.00422914	Coding
Skil	586.788	-0.39917	0.10557	-3.78108	0.00015615	0.00430579	Coding
Cdkn2d	336.621	-0.359099	0.0950466	-3.77814	0.000158005	0.00434644	Coding
Cyb5r3	2034.03	-0.290182	0.0768203	-3.77741	0.000158465	0.00434644	Coding
Tram1	1435.35	-0.22691	0.0600685	-3.77751	0.000158401	0.00434644	Coding
Rps19-ps6	400.644	-0.266179	0.0704934	-3.77594	0.000159406	0.00436453	Ribosomal
Gpn2	82.5626	-0.533583	0.141462	-3.77193	0.000161992	0.00441996	Coding
Cd59a	116.835	-1.1354	0.301014	-3.77191	0.000162001	0.00441996	Coding
Gm43445	40.0483	0.812009	0.215354	3.77057	0.000162874	0.00443596	Predicted
Ap4e1	52.1354	0.632819	0.168053	3.7656	0.000166152	0.00451728	Coding
Il7	24.7792	0.948683	0.251967	3.7651	0.000166481	0.00451832	Coding
Saa1	205.725	1.07607	0.286071	3.76155	0.000168862	0.00456695	Coding
Nr2f6	419.148	-0.303887	0.08078	-3.76191	0.000168623	0.00456695	Coding
Myadm	1054.27	-0.430715	0.114564	-3.7596	0.000170185	0.0045897	Coding
Prrx2	1068.13	-0.410083	0.109087	-3.75923	0.000170438	0.0045897	Coding
Amotl2	1024.84	0.6411	0.17057	3.75857	0.000170888	0.0045897	Coding
Lix1l	703.953	-0.229689	0.0611091	-3.75867	0.000170818	0.0045897	Coding
Ccl11	8920.68	0.704216	0.187422	3.75738	0.000171699	0.0046035	Coding
Gm12166	190.896	0.375077	0.099839	3.75681	0.000172092	0.00460605	Predicted
Galr2	6.89852	-4.19092	1.11597	-3.75541	0.000173057	0.00462391	Coding
Slirp	1003.33	0.328154	0.0874279	3.75343	0.000174434	0.00465267	Coding
Sertad4	105.711	-0.757283	0.201829	-3.75211	0.000175356	0.00466922	Coding
Map3k8	248.753	0.601908	0.160482	3.75062	0.0001764	0.00468898	Coding
Crebrf	201.758	0.512012	0.136859	3.74117	0.000183164	0.00486043	Coding
Cndp2	830.959	0.336226	0.0898889	3.74046	0.00018368	0.0048658	Coding
Hmga2	295.616	0.605943	0.162028	3.73975	0.000184206	0.0048661	Coding
Nsrp1	369.319	0.274352	0.0733641	3.73959	0.00018432	0.0048661	Coding
Slc4a11	38.8319	0.827904	0.222418	3.72228	0.000197429	0.00520332	Coding
Sec62	3138.41	0.189672	0.0510222	3.71743	0.000201256	0.00528621	Coding
Brd9	231.851	0.423583	0.113941	3.71757	0.000201149	0.00528621	Coding
Opcml	48.5167	1.12667	0.303496	3.71231	0.000205373	0.00538522	Coding
Usp18	264.834	0.478975	0.129133	3.70916	0.000207947	0.0054435	Coding
Hsp90ab1	16823.8	0.231774	0.0625066	3.70799	0.000208907	0.00545941	Coding
Gchfr	37.7161	0.805847	0.217525	3.70461	0.000211715	0.00552349	Coding
Rpl39	26712.8	0.173828	0.0469944	3.6989	0.000216532	0.00561961	Ribosomal
Rpl17-ps10	30.1945	-0.897457	0.242652	-3.69853	0.00021685	0.00561961	Ribosomal
Larp1b	94.3505	-0.571775	0.15458	-3.69889	0.000216541	0.00561961	Coding
Fmod	111.261	-2.23025	0.602876	-3.69935	0.000216154	0.00561961	Coding
Yif1a	1089.03	-0.219044	0.0592407	-3.69753	0.00021771	0.00563246	Coding
Col12a1	7401.4	-0.544098	0.147173	-3.69698	0.000218176	0.00563512	Coding
Arhgef1	189.934	-0.381614	0.103241	-3.69633	0.00021874	0.00563663	Coding
Gm42819	80.5416	0.705288	0.190821	3.69607	0.000218962	0.00563663	Predicted
Mgarp	268.226	-0.750668	0.203152	-3.69511	0.000219795	0.0056487	Coding
Ramp3	5.16762	2.8134	0.762363	3.69037	0.000223932	0.00574548	Coding
Nfe2l2	944.728	0.517114	0.140175	3.68907	0.000225078	0.00575093	Coding
Mt3	6.84273	3.17429	0.860595	3.68848	0.000225598	0.00575093	Coding
Fbxl5	632.972	0.66252	0.17962	3.68845	0.000225628	0.00575093	Coding
Gls2	11.7094	-1.7562	0.476005	-3.68946	0.000224727	0.00575093	Coding
Myh10	216.252	-0.530852	0.144031	-3.68569	0.000228088	0.00580407	Coding
AC124744.2	767.593	0.228516	0.0620357	3.68362	0.000229949	0.00584182	Noncoding
Cmya5	42.8295	-1.06434	0.289219	-3.68005	0.000233186	0.00591438	Coding
Actr1b	477.922	-0.337249	0.0917164	-3.67709	0.000235913	0.00597377	Coding
Smg6	279.233	-0.509512	0.138723	-3.67288	0.000239834	0.00604342	Coding
Hspe1	6157.38	0.371118	0.101027	3.67347	0.000239279	0.00604342	Coding
S100a1	567.607	0.446371	0.12152	3.67324	0.000239492	0.00604342	Coding
E330013P04Rik	34.2181	0.828166	0.22556	3.6716	0.000241038	0.00606391	Noncoding
Ak1	780.117	-0.318216	0.0867108	-3.66986	0.000242683	0.00608554	Coding
Flrt3	105.541	0.580282	0.158119	3.66992	0.000242626	0.00608554	Coding
Arl4c	437.853	-0.506969	0.138295	-3.66585	0.000246514	0.00617161	Coding
Pmvk	185.814	-0.441341	0.120435	-3.66457	0.000247755	0.00619267	Coding
Kif13b	69.2127	0.635554	0.173502	3.66309	0.000249188	0.00621848	Coding
Pdia5	568.589	-0.349556	0.0954424	-3.66248	0.000249789	0.00622344	Coding
Gm26532	194.712	0.589171	0.161019	3.65903	0.000253175	0.00629768	Predicted
Phf11a	15.5403	1.50462	0.411289	3.6583	0.000253889	0.00630532	Coding
Sqor	336.823	0.641092	0.175335	3.65639	0.000255796	0.00634252	Coding
Abl2	259.728	0.485861	0.132926	3.65511	0.000257072	0.00636023	Coding
Cish	105.02	0.680063	0.186071	3.65485	0.000257331	0.00636023	Coding
Lgals9	893.96	0.329193	0.090163	3.65108	0.000261139	0.00643457	Coding
Urah	7.04368	1.84081	0.504185	3.65105	0.000261169	0.00643457	Coding
Ttll5	69.1441	-0.927337	0.254094	-3.64958	0.000262669	0.00646124	Coding
Gm15056	24.6168	1.50939	0.41366	3.64886	0.000263407	0.00646911	Predicted
Cxxc5	377.577	-0.381124	0.104558	-3.6451	0.000267292	0.00655415	Coding
Rnasek	6.27863	-1.92874	0.52925	-3.64428	0.000268138	0.00656452	Coding
Socs3	2172.45	0.402501	0.110512	3.64215	0.000270371	0.00660034	Coding
Nags	5.97909	-2.73055	0.749725	-3.64207	0.000270453	0.00660034	Coding
Wnt10a	17.9305	1.02681	0.282072	3.64023	0.000272397	0.00663733	Coding
Tm9sf1	418.503	-0.274709	0.0755607	-3.63561	0.000277323	0.00674673	Coding
Atoh8	31.4119	-0.968779	0.266925	-3.62941	0.000284067	0.00689411	Coding
Pmp22	2111.96	0.392705	0.108206	3.62923	0.00028427	0.00689411	Coding
Gm44441	144.795	0.55728	0.153973	3.61933	0.000295363	0.00715193	Predicted
Mical2	365.611	-0.722066	0.199852	-3.61301	0.000302664	0.00729571	Coding
Gm11127	34.2957	0.822322	0.227603	3.61297	0.000302713	0.00729571	Predicted
Ralbp1	1383.02	0.254077	0.0703197	3.61317	0.000302472	0.00729571	Coding
Ptpn13	164.929	0.520321	0.144088	3.61115	0.000304848	0.00733575	Coding
Tmem147	702.397	-0.222236	0.0615555	-3.61033	0.00030581	0.0073475	Coding
Cercam	304.579	-0.473914	0.131306	-3.60923	0.000307105	0.0073672	Coding
Snx24	159.034	-0.551617	0.152881	-3.60815	0.000308382	0.0073864	Coding
Ifi211	570.208	0.583867	0.162047	3.60307	0.000314476	0.00752074	Coding
9530082P21Rik	43.8999	0.686059	0.190549	3.60043	0.000317686	0.00758578	Noncoding
Il6	1406.63	1.00838	0.280105	3.6	0.000318216	0.00758677	Coding
Rpl10	13066.4	-0.167539	0.0465455	-3.59947	0.000318865	0.00759	Ribosomal
Gm26523	306.312	0.448067	0.124495	3.59909	0.000319332	0.00759	Predicted
H2-T10	272.423	0.575236	0.159899	3.5975	0.000321291	0.00762487	Coding
Klf2	1915.61	0.493636	0.137253	3.59655	0.000322467	0.00764108	Coding
Il15	46.6997	0.770369	0.214439	3.59248	0.00032755	0.00774968	Coding
N4bp1	346.116	0.304256	0.084723	3.59119	0.000329174	0.00777623	Coding
Sgcd	56.3266	-1.01107	0.28205	-3.58472	0.000337446	0.00794813	Coding
Ubl5	2816.91	0.150529	0.0419922	3.58469	0.000337476	0.00794813	Coding
Gm45540	157.105	0.838521	0.234062	3.58248	0.000340348	0.00800361	Predicted
Tnfsf13b	137.952	0.582155	0.163001	3.57148	0.000354964	0.00833467	Coding
AC152944.1	5.89812	-2.82469	0.791505	-3.56876	0.00035868	0.00840918	Noncoding
Stk26	18.0815	-1.62343	0.455081	-3.56734	0.000360625	0.00844201	Coding
Ccng1	582.244	0.359791	0.100911	3.56544	0.000363244	0.00849048	Coding
Rnft1	458.711	-0.303488	0.0851464	-3.5643	0.000364825	0.00850179	Coding
Cd1d1	135.542	0.485119	0.136091	3.56466	0.000364334	0.00850179	Coding
Ikbkg	130.471	0.690945	0.193964	3.56224	0.00036771	0.00855615	Coding
Ccdc25	525.543	0.292143	0.0820349	3.56121	0.000369155	0.00856667	Coding
Tln2	429.705	-0.406765	0.114236	-3.56073	0.00036982	0.00856667	Coding
Ndufa6	1489.92	0.21706	0.0609554	3.56097	0.000369494	0.00856667	Coding
H2-T24	27.194	0.890069	0.250052	3.55953	0.000371515	0.00859309	Coding
Kirrel	294.944	-0.306651	0.0861938	-3.55769	0.000374134	0.00864077	Coding
Fam185a	39.6495	-0.878071	0.246928	-3.55598	0.000376579	0.0086843	Coding
Kcng2	26.4771	-1.08721	0.306522	-3.54692	0.000389764	0.008975	Coding
Erich1	126.738	0.376079	0.106042	3.5465	0.000390386	0.00897599	Coding
Slc43a3	1015.07	0.493092	0.13922	3.54181	0.00039739	0.00912349	Coding
Gipr	4.37851	-3.57005	1.00849	-3.53999	0.000400147	0.00917319	Coding
Uba5	646.126	-0.219707	0.0620977	-3.53809	0.000403037	0.00922581	Coding
Rpl17	14466.3	-0.198102	0.0560036	-3.53731	0.000404223	0.0092393	Ribosomal
Podxl2	117.289	-0.896499	0.253632	-3.53465	0.00040832	0.0093192	Coding
Pnpla2	62.3382	0.609805	0.172615	3.53274	0.000411282	0.00935922	Coding
Hcfc2	44.3412	-0.64558	0.182727	-3.53302	0.000410836	0.00935922	Coding
Zfand5	1100.57	0.394489	0.111736	3.53054	0.000414718	0.00942359	Coding
Gsta3	12.1279	1.82882	0.518347	3.52817	0.000418436	0.00947846	Coding
Rpl7-ps7	482.804	-0.250832	0.0711162	-3.52707	0.000420191	0.00947846	Ribosomal
Zdhhc9	216.334	-0.430918	0.122165	-3.52734	0.000419757	0.00947846	Coding
Arfgap1	411.236	-0.27158	0.0769658	-3.52857	0.000417806	0.00947846	Coding
Ppp1ca	2615.37	-0.23844	0.0675992	-3.52726	0.000419882	0.00947846	Coding
Pnpla7	51.1799	0.625352	0.177343	3.52623	0.000421517	0.00949456	Coding
Tbc1d23	233.644	-0.333047	0.0944703	-3.52541	0.000422821	0.00951009	Coding
Gstm1	905.493	0.731528	0.207563	3.52437	0.000424492	0.00953385	Coding
C1qtnf3	1023.12	-1.78376	0.506894	-3.51901	0.000433164	0.00971453	Coding
Rpa3	428.097	-0.379137	0.107768	-3.51809	0.000434668	0.00973418	Coding
Eef1akmt3	97.4969	-0.529716	0.150657	-3.51605	0.000438022	0.00979512	Coding
Fbln2	12797.3	-0.318598	0.0907146	-3.51209	0.000444597	0.00992784	Coding
Ptms	3393.97	-0.252777	0.0720387	-3.5089	0.00044996	0.0100331	Coding
Sox5	77.7648	0.711494	0.202823	3.50795	0.000451573	0.0100546	Coding
Slamf8	147.278	0.897877	0.255996	3.50739	0.000452517	0.0100612	Coding
Gm26545	12.4649	1.26809	0.361656	3.50635	0.000454297	0.0100863	Predicted
Mir155hg	197.185	0.906671	0.258643	3.5055	0.000455753	0.0101013	Noncoding
Car13	209.139	0.43834	0.125055	3.50519	0.000456277	0.0101013	Coding
Plod1	1073.72	-0.515215	0.147152	-3.50124	0.0004631	0.0102377	Coding
Rara	176.404	-0.375886	0.107425	-3.49905	0.000466914	0.0103074	Coding
Dusp6	182.875	0.563184	0.161035	3.49727	0.000470043	0.0103617	Coding
Ascl2	10.1041	-1.8541	0.530544	-3.49471	0.000474573	0.0104467	Coding
C1s2	1499.11	0.619742	0.177361	3.49423	0.000475426	0.0104506	Coding
Kin	191.695	0.350415	0.100299	3.49369	0.000476387	0.0104569	Coding
2810474O19Rik	611.073	0.523308	0.14988	3.49151	0.000480293	0.0105277	Coding
Zfp945	70.0853	0.586588	0.168028	3.49101	0.000481201	0.0105327	Coding
Unc93b1	330.026	0.370253	0.106092	3.48991	0.00048318	0.0105611	Coding
Brk1	1605.92	-0.175589	0.0503893	-3.48465	0.000492775	0.0107557	Coding
Csprs	28.7648	1.10941	0.318592	3.48223	0.000497247	0.010838	Coding
Hspb8	913.448	0.512832	0.147421	3.47868	0.000503883	0.0109456	Coding
Stk25	222.318	-0.32817	0.0943404	-3.47857	0.000504092	0.0109456	Coding
En1	340.496	0.275823	0.0792946	3.47846	0.000504303	0.0109456	Coding
Gm44436	205.674	0.545279	0.156853	3.47636	0.000508264	0.0110125	Predicted
Zfp667	36.8115	-0.760367	0.218743	-3.47608	0.000508804	0.0110125	Coding
Fhl2	267.732	-0.638322	0.183677	-3.47524	0.000510399	0.0110316	Coding
Prr13	1686.15	0.502828	0.144715	3.47461	0.000511603	0.0110422	Coding
Eda2r	26.3837	0.865108	0.249075	3.47328	0.000514139	0.0110696	Coding
Pdgfa	186.907	-0.598718	0.172382	-3.47319	0.000514302	0.0110696	Coding
Homer1	146.436	-0.666087	0.191924	-3.47058	0.00051933	0.0111624	Coding
Gm6634	35.9827	0.679132	0.195796	3.46856	0.000523249	0.011231	Predicted
Lmln	12.8179	-1.26791	0.365664	-3.46742	0.000525475	0.0112632	Coding
Ccl7	16211.4	0.645452	0.18623	3.46589	0.000528484	0.011312	Coding
Hhipl1	244.571	-0.435562	0.125764	-3.46334	0.00053351	0.0113942	Coding
Tm9sf3	1991.92	-0.209789	0.0605766	-3.4632	0.000533794	0.0113942	Coding
Cd3eap	250.162	-0.490835	0.141763	-3.46235	0.000535484	0.0114146	Coding
Plcg1	122.665	-0.423071	0.122327	-3.45852	0.000543144	0.011562	Coding
Tor3a	415.787	0.284347	0.0822329	3.45782	0.000544565	0.0115763	Coding
Rps27rt	1027.51	0.266197	0.0770309	3.45572	0.000548824	0.0116242	Ribosomal
Zpr1	381.322	-0.39947	0.115587	-3.45602	0.000548222	0.0116242	Coding
Ciita	5.93465	2.1524	0.622873	3.4556	0.000549068	0.0116242	Coding
Heatr5a	238.936	-0.299771	0.0868509	-3.45156	0.000557356	0.0117835	Coding
Ttll2	14.2556	1.21382	0.351743	3.45088	0.000558756	0.0117971	Coding
Txn1	8978.29	0.32997	0.0956963	3.4481	0.000564553	0.0119032	Coding
Col18a1	330.287	0.424084	0.123035	3.44686	0.000567134	0.0119414	Coding
Oma1	70.8061	0.492306	0.142906	3.44496	0.000571146	0.0120096	Coding
Cnih1	1294.63	-0.155777	0.045252	-3.44243	0.000576504	0.0121058	Coding
Klhl24	228.765	0.320589	0.0931972	3.4399	0.000581923	0.0122031	Coding
Twist2	580.136	0.381822	0.111057	3.43808	0.000585861	0.012269	Coding
Usp25	539.951	0.246553	0.0718983	3.42919	0.000605377	0.0126606	Coding
Tpm4	3731.58	-0.36257	0.105756	-3.42836	0.00060724	0.0126654	Coding
Rpl37	20931.2	0.171487	0.0500165	3.42861	0.000606676	0.0126654	Ribosomal
Gm14005	309.76	0.441533	0.129078	3.42066	0.000624694	0.0130119	Predicted
Zcchc24	944.979	0.196645	0.0575427	3.41737	0.000632288	0.0131524	Coding
Creb3l2	575.839	-0.402017	0.11766	-3.41676	0.000633721	0.0131646	Coding
Lrch1	74.8298	0.738501	0.216223	3.41546	0.00063675	0.0132098	Coding
Mcrip1	1696.36	-0.195494	0.0572561	-3.41437	0.000639287	0.0132447	Coding
G3bp2	1024.41	0.307497	0.0900735	3.41385	0.000640516	0.0132524	Coding
Plpp5	582.533	-0.269638	0.079027	-3.41198	0.000644938	0.0133084	Coding
Ptgfrn	812.645	-0.390797	0.114527	-3.41225	0.000644279	0.0133084	Coding
Slc2a3	49.7202	-1.18238	0.346758	-3.40981	0.000650086	0.0133968	Coding
Tjap1	111.914	-0.429549	0.126027	-3.40838	0.000653487	0.013449	Coding
Nt5dc3	67.0893	0.552225	0.162133	3.406	0.000659228	0.0135331	Coding
Egr2	285.799	-0.468305	0.137496	-3.40596	0.000659319	0.0135331	Coding
Inhbb	237.122	0.56624	0.166486	3.40113	0.000671071	0.0137561	Coding
Ndufv3	1915.12	0.178222	0.0524308	3.39918	0.000675884	0.0138364	Coding
F5	19.253	-1.46286	0.430607	-3.3972	0.000680788	0.0139184	Coding
Lrrc17	1369.56	-0.579986	0.1708	-3.3957	0.000684528	0.0139593	Coding
Mxra7	845.001	-0.28624	0.0842954	-3.39568	0.000684588	0.0139593	Coding
Bst1	807.698	1.64981	0.486001	3.39467	0.000687114	0.0139924	Coding
Reep5	4338.35	-0.311575	0.0917953	-3.39424	0.000688201	0.0139961	Coding
Irak3	541.452	0.815143	0.240211	3.39345	0.000690181	0.014018	Coding
Ikbke	98.6092	0.469549	0.138539	3.38929	0.000700732	0.0142137	Coding
Tsnax	335.504	-0.297724	0.087856	-3.38877	0.000702069	0.0142222	Coding
Dusp1	4591.92	0.638104	0.188321	3.38839	0.000703041	0.0142233	Coding
Ssr3	3530.99	-0.168539	0.0497737	-3.38611	0.000708916	0.0143234	Coding
Gm8113	15.4156	1.16574	0.344435	3.3845	0.000713085	0.0143889	Predicted
Oxtr	11.9752	1.62127	0.479211	3.3832	0.000716462	0.0144195	Coding
Gda	1826.12	0.729474	0.21561	3.38331	0.000716188	0.0144195	Coding
Carmn	33.9983	-0.737653	0.218201	-3.38061	0.000723244	0.0145109	Noncoding
Gde1	497.308	-0.246179	0.0728224	-3.38055	0.000723418	0.0145109	Coding
Rab15	39.025	-0.759849	0.224781	-3.3804	0.000723812	0.0145109	Coding
Bpgm	299.785	-0.951891	0.281779	-3.37815	0.00072975	0.014611	Coding
Aldh18a1	283.669	-0.301094	0.089154	-3.37723	0.000732195	0.0146411	Coding
Gm10275	226.461	-0.328265	0.0972215	-3.37646	0.000734238	0.014663	Predicted
Prm3	9.27284	2.08309	0.617024	3.37602	0.000735422	0.0146677	Coding
Saa2	24.7915	1.5201	0.450492	3.37432	0.000739992	0.0147327	Coding
Mxd4	951.776	-0.231918	0.0687348	-3.3741	0.000740579	0.0147327	Coding
Rbms2	745.153	-0.475911	0.141226	-3.36984	0.000752109	0.0149429	Coding
Sorcs2	117.371	-0.946747	0.281205	-3.36675	0.000760592	0.0150921	Coding
Slc22a23	10.9149	1.62879	0.484168	3.36409	0.000767965	0.0152189	Coding
Kcnk2	7.40967	-2.25271	0.670565	-3.35943	0.000781048	0.0154584	Coding
Krt19	98.454	-2.24734	0.66916	-3.35845	0.000783799	0.015493	Coding
Itgb1	3818.5	-0.315219	0.0938891	-3.35736	0.000786903	0.0155346	Coding
Plpp2	90.6258	-0.605592	0.180607	-3.35309	0.000799141	0.0157561	Coding
Mtcl1	34.2416	-0.905426	0.270121	-3.35193	0.000802494	0.0158021	Coding
Pdcd5	1487.57	0.230072	0.068649	3.35142	0.000803971	0.0158111	Coding
Rps26	18912.8	0.154843	0.0462106	3.35081	0.000805766	0.0158263	Ribosomal
Cpd	860.495	0.242008	0.0722696	3.34868	0.00081198	0.0159282	Coding
S100a9	10.2724	2.56212	0.765292	3.3479	0.000814271	0.0159529	Coding
Dram1	1591.48	0.443536	0.132523	3.34686	0.000817317	0.0159924	Coding
Malsu1	578.148	0.216979	0.0648478	3.34598	0.000819929	0.0160031	Coding
Maz	340.649	-0.305174	0.091202	-3.34614	0.000819455	0.0160031	Coding
Slc43a2	15.7256	1.1267	0.336858	3.34474	0.000823586	0.0160542	Coding
Myrip	12.7111	-1.77954	0.532233	-3.34353	0.000827196	0.0161043	Coding
Snhg9	34.0659	0.704645	0.210941	3.34048	0.000836334	0.0162618	Noncoding
Stt3a	1539.91	-0.228464	0.0684103	-3.33962	0.000838929	0.0162918	Coding
Phldb2	712.021	-0.407181	0.122078	-3.33541	0.000851743	0.01652	Coding
Rps19	12998.9	0.156902	0.0470732	3.33314	0.000858713	0.0166343	Ribosomal
Hmgcl	289.014	-0.301764	0.0906614	-3.32848	0.000873226	0.0168776	Coding
Lncpint	71.0598	0.716675	0.215321	3.3284	0.000873451	0.0168776	Noncoding
Mkl1	95.2052	-0.518479	0.155805	-3.32775	0.000875491	0.016896	Coding
Syf2	603.027	0.210999	0.0634916	3.32326	0.000889734	0.0171495	Coding
Nmi	456.199	0.682883	0.205533	3.3225	0.000892132	0.0171744	Coding
AC153368.1	226.975	-0.291447	0.0877583	-3.32102	0.000896899	0.0172447	Noncoding
Rflna	8.07512	-2.62592	0.790785	-3.32065	0.000898081	0.0172461	Coding
Serpinb1b	68.3509	0.747035	0.225017	3.3199	0.000900496	0.0172497	Coding
Grhpr	336.069	-0.54271	0.163467	-3.32	0.000900186	0.0172497	Coding
Tyrobp	11.3318	1.73639	0.523157	3.31906	0.000903226	0.0172806	Coding
Trim11	104.707	0.567855	0.171254	3.31586	0.0009136	0.0174152	Coding
Icam1	761.611	0.507068	0.152922	3.31585	0.000913632	0.0174152	Coding
Gusb	334.975	-0.360354	0.108674	-3.31592	0.000913423	0.0174152	Coding
Gm20707	24.8031	0.800024	0.241395	3.31417	0.000919168	0.0174992	Predicted
Pde4dip	197.198	-0.391135	0.118124	-3.31123	0.000928875	0.0176623	Coding
Samd1	141.414	-0.403405	0.1219	-3.3093	0.00093531	0.0177629	Coding
Bace1	376.845	-0.569652	0.17233	-3.30559	0.000947779	0.0179776	Coding
Saysd1	325.154	0.308239	0.0932657	3.30496	0.000949901	0.0179959	Coding
Gadd45b	2073.8	-0.412018	0.1247	-3.30407	0.000952909	0.0180308	Coding
Btg1	2264.18	0.489842	0.148391	3.30101	0.000963359	0.0181564	Coding
Mrpl23	92.0916	-0.424574	0.128604	-3.30141	0.000962005	0.0181564	Coding
Pml	173.301	0.318766	0.0965658	3.30102	0.000963332	0.0181564	Coding
Itpka	5.40822	1.76651	0.535182	3.30076	0.000964235	0.0181564	Coding
Ap2m1	1570.56	-0.221124	0.0670217	-3.2993	0.000969279	0.0182293	Coding
Adgrl1	182.83	-0.344008	0.104293	-3.29849	0.000972075	0.0182546	Coding
1700003F12Rik	41.8654	-0.797224	0.241713	-3.29823	0.00097298	0.0182546	Coding
P4ha3	840.674	-0.456775	0.138566	-3.29645	0.000979141	0.018285	Coding
Irx2	122.919	0.494591	0.15004	3.2964	0.000979322	0.018285	Coding
Pcdh20	27.3074	-1.24261	0.376892	-3.29699	0.000977282	0.018285	Coding
Nfe2l1	507.068	0.238096	0.0722142	3.29708	0.000976944	0.018285	Coding
Wdtc1	127.904	0.38021	0.115389	3.29504	0.000984089	0.0183519	Coding
Zc3h6	123.036	0.453418	0.137625	3.2946	0.000985633	0.0183586	Coding
Gtf2e2	442.561	-0.277086	0.0841443	-3.29299	0.000991289	0.0183756	Coding
Btbd1	491.283	-0.262435	0.0796822	-3.29352	0.000989407	0.0183756	Coding
Lyz2	22.9438	0.919273	0.279143	3.2932	0.000990529	0.0183756	Coding
P2ry6	5.57372	-2.22506	0.675664	-3.29314	0.000990748	0.0183756	Coding
Arhgap8	18.2461	0.991351	0.301123	3.29218	0.000994132	0.0184063	Coding
Mras	230.781	0.423726	0.128798	3.28984	0.00100246	0.0185383	Coding
Rps3	21892.9	-0.152548	0.0463747	-3.28946	0.00100379	0.0185409	Ribosomal
Tor1aip1	726.321	0.20733	0.063047	3.2885	0.00100722	0.0185821	Coding
Mxi1	261.173	-0.622585	0.189497	-3.28546	0.00101816	0.0187614	Coding
Camta1	12.551	-1.17563	0.357977	-3.28408	0.00102315	0.018831	Coding
Pgp	775.666	-0.485385	0.147946	-3.28082	0.00103505	0.0190274	Coding
Bsg	8235.44	-0.443389	0.135296	-3.27718	0.0010485	0.0192519	Coding
Ankrd33b	15.8073	1.73241	0.528764	3.27635	0.0010516	0.0192859	Coding
Zufsp	114.07	0.400567	0.122275	3.27595	0.00105307	0.01929	Coding
Jmy	202.226	-0.46362	0.141609	-3.27395	0.00106056	0.0194044	Coding
Sigmar1	948.759	-0.3551	0.108484	-3.2733	0.001063	0.019426	Coding
Gm7846	27.6088	-0.84287	0.257534	-3.27285	0.00106468	0.0194339	Predicted
Tmx4	353.106	0.307107	0.0939003	3.27057	0.00107332	0.0195685	Coding
Rnf2	250.097	-0.272268	0.0832783	-3.26938	0.00107783	0.0196277	Coding
Fam198b	308.431	-0.821457	0.251435	-3.26707	0.00108667	0.0197653	Coding
Atp6v1e1	1024.49	0.232687	0.0712555	3.26553	0.0010926	0.01985	Coding
H1f0	721.814	-0.277262	0.0849155	-3.26515	0.00109406	0.0198531	Coding
AC113059.1	11.5154	1.22014	0.373784	3.2643	0.00109736	0.0198897	Noncoding
St13	1470.86	0.166236	0.0509579	3.26221	0.00110547	0.0200134	Coding
Slc1a4	50.5883	-0.764048	0.234326	-3.26062	0.0011117	0.0201027	Coding
Gm2076	4.48745	-2.44681	0.750739	-3.2592	0.00111728	0.0201569	Predicted
Stx1b	24.3925	0.871914	0.267524	3.25919	0.0011173	0.0201569	Coding
Gap43	95.1459	-1.24549	0.382457	-3.25654	0.00112779	0.0202754	Coding
Inpp1	132.483	0.387961	0.119122	3.25685	0.00112657	0.0202754	Coding
N4bp2l2	394.355	0.249941	0.0767413	3.25693	0.00112624	0.0202754	Coding
Morc4	108.244	-0.420235	0.129061	-3.2561	0.00112952	0.020283	Coding
Cenpb	865.12	-0.260881	0.0802136	-3.25233	0.00114463	0.0205305	Coding
Ube2m	1231.83	-0.252574	0.0776932	-3.25091	0.00115037	0.0206095	Coding
Sectm1a	75.7728	0.642502	0.197833	3.24769	0.00116345	0.0208198	Coding
Plp2	722.489	-0.366547	0.112892	-3.24688	0.00116676	0.020855	Coding
Daxx	220.449	0.449639	0.13851	3.24627	0.0011693	0.0208593	Coding
Klhl9	413.693	-0.253403	0.0780621	-3.24617	0.0011697	0.0208593	Coding
Mfsd7a	47.3293	0.629243	0.194205	3.24009	0.00119492	0.0212847	Coding
Adar	163.878	0.416954	0.128716	3.23933	0.00119812	0.0213173	Coding
Hivep1	223.637	0.42364	0.130839	3.23787	0.00120425	0.0214017	Coding
Rbms1	2868.4	0.224988	0.069502	3.23715	0.00120729	0.0214311	Coding
Cfb	456.018	0.473388	0.146326	3.23516	0.00121576	0.0215569	Coding
Mfsd10	458.697	-0.251783	0.0778462	-3.23436	0.00121915	0.0215675	Coding
Mat2a	1465.48	0.301732	0.0932851	3.23452	0.00121849	0.0215675	Coding
Ttc39c	269.364	0.329242	0.101831	3.23322	0.00122404	0.0216293	Coding
Fbn2	494.322	-0.907965	0.280916	-3.23215	0.00122861	0.0216854	Coding
Bmpr2	1183.54	-0.237444	0.0734969	-3.23067	0.00123501	0.0217736	Coding
Crybg1	10.8735	1.22023	0.378061	3.22761	0.00124831	0.0219829	Coding
Snrpb2	663.436	0.250104	0.0775371	3.2256	0.00125708	0.0220872	Coding
Tmem95	19.4844	-1.35461	0.41992	-3.22588	0.00125587	0.0220872	Coding
Tle4	40.1877	0.811043	0.251494	3.2249	0.00126018	0.0221166	Coding
Lrif1	195.717	0.327156	0.101464	3.22436	0.00126254	0.022133	Coding
Rnf19b	1011.16	0.332586	0.103223	3.22203	0.00127288	0.0222891	Coding
Wtip	391.903	-0.269122	0.0835557	-3.22087	0.00127802	0.0223285	Coding
Grk5	233.577	0.681111	0.211463	3.22094	0.0012777	0.0223285	Coding
Enc1	759.663	0.587941	0.182582	3.22015	0.00128124	0.0223597	Coding
Gm26771	131.274	0.581776	0.180712	3.21936	0.00128479	0.0223963	Predicted
Lgals7	142.708	0.648874	0.201606	3.21852	0.00128854	0.0224365	Coding
Arhgap9	5.44885	1.8471	0.574025	3.21781	0.00129171	0.0224665	Coding
Gng5	7310.2	0.133589	0.0415506	3.2151	0.00130401	0.022655	Coding
Parp4	129.65	0.344703	0.107243	3.21422	0.00130798	0.0226984	Coding
C530008M17Rik	6.06302	-2.01465	0.626906	-3.21363	0.00131067	0.0227197	Coding
Parm1	267.361	0.826395	0.257367	3.21095	0.00132295	0.0229071	Coding
Acyp2	236.185	0.327575	0.102057	3.20973	0.00132859	0.022979	Coding
Gm15644	28.79	0.874624	0.272612	3.20831	0.00133516	0.0230669	Predicted
Tma16	273.346	0.344701	0.107452	3.20795	0.00133684	0.0230701	Coding
Ildr2	122.406	-0.553701	0.172663	-3.20682	0.00134209	0.023135	Coding
Eif3j1	335.55	0.243347	0.0759558	3.20379	0.0013563	0.0233539	Coding
Rps26-ps1	452.577	0.291913	0.0911326	3.20317	0.00135923	0.0233785	Ribosomal
Mboat2	11.4947	-1.64263	0.512904	-3.2026	0.00136191	0.0233986	Coding
Myo1d	38.0942	-0.816314	0.255012	-3.20108	0.00136915	0.0234968	Coding
AC159244.3	33.8107	0.65689	0.205234	3.20069	0.00137098	0.0235023	Noncoding
Pdzd2	43.4475	1.18953	0.371808	3.19932	0.00137751	0.0235621	Coding
Tmem51	31.195	0.803807	0.251223	3.19958	0.00137627	0.0235621	Coding
Rpl22l1	8374.86	-0.175254	0.0547939	-3.19843	0.00138179	0.0236093	Ribosomal
Gm7565	30.5339	0.691692	0.216529	3.19445	0.00140097	0.0238076	Predicted
Cox7b	3235.97	0.187263	0.0586217	3.19444	0.00140105	0.0238076	Coding
Rab9	587.119	0.264563	0.0828202	3.19443	0.00140108	0.0238076	Coding
Tlr7	6.03613	2.03632	0.637341	3.19503	0.00139818	0.0238076	Coding
Crlf1	1264.82	-0.892753	0.27943	-3.19491	0.00139873	0.0238076	Coding
Ifi202b	2074.43	0.448402	0.140423	3.19323	0.00140693	0.0238808	Coding
Tfr2	24.4055	-1.01695	0.318521	-3.19271	0.00140944	0.0238972	Coding
Ptprs	508.813	-0.322997	0.101285	-3.189	0.00142764	0.0241794	Coding
Slc11a2	195.401	0.380952	0.11956	3.1863	0.00144105	0.0243799	Coding
Mcoln2	254.259	0.454185	0.142655	3.18381	0.00145349	0.0245109	Coding
Rpl26	425.29	-0.249012	0.0782066	-3.18403	0.00145241	0.0245109	Ribosomal
Cyld	179.203	0.343694	0.107951	3.1838	0.00145354	0.0245109	Coding
Ank	137.412	-0.762614	0.239768	-3.18063	0.00146954	0.0247304	Coding
Ccl5	94.9232	2.21796	0.69736	3.18051	0.00147014	0.0247304	Coding
Ahsg	26.7096	-1.26977	0.399263	-3.18028	0.00147134	0.0247304	Coding
Gstp2	18.1654	-1.09785	0.345566	-3.17698	0.0014882	0.0249865	Coding
Arhgdig	74.9909	-0.846964	0.266712	-3.17558	0.00149538	0.02508	Coding
Gm15867	52.9422	-0.688672	0.217019	-3.17333	0.00150701	0.0252478	Predicted
Lgr5	54.3432	-1.3602	0.429155	-3.16948	0.00152711	0.0255569	Coding
Ninl	25.9511	0.742827	0.234456	3.16829	0.00153336	0.0256338	Coding
Uqcr11	2562.32	0.206388	0.0651521	3.16779	0.00153602	0.0256506	Coding
Gm10073	823.914	0.194117	0.0612953	3.16691	0.00154066	0.0257003	Predicted
Zc2hc1a	182.394	0.329331	0.104079	3.16425	0.00155482	0.0259087	Coding
Mnat1	353.574	0.229128	0.0724747	3.16149	0.00156964	0.0261276	Coding
Swt1	312.603	0.437643	0.138494	3.16001	0.00157763	0.0262324	Coding
Rer1	2201.37	-0.138152	0.0437246	-3.1596	0.00157988	0.0262416	Coding
Ccrl2	81.7443	0.926241	0.293264	3.15838	0.00158647	0.0263228	Coding
Ptpn2	555.945	0.442206	0.140068	3.15708	0.00159358	0.0264125	Coding
Limk2	74.1536	-0.625165	0.198079	-3.15613	0.00159877	0.0264702	Coding
Artn	44.8657	0.565053	0.179144	3.15419	0.00160945	0.0264786	Coding
Dmd	87.4616	-0.524309	0.166242	-3.15389	0.00161112	0.0264786	Coding
Runx1t1	288.59	0.451151	0.143007	3.15475	0.00160634	0.0264786	Coding
Cacfd1	244.196	-0.30846	0.0978039	-3.15387	0.00161124	0.0264786	Coding
Mroh1	66.8581	0.489905	0.155314	3.1543	0.00160884	0.0264786	Coding
Mfge8	1756.35	-0.323786	0.102651	-3.15423	0.0016092	0.0264786	Coding
Med14	119.666	-0.410447	0.130091	-3.15509	0.00160448	0.0264786	Coding
Gdi2	3037.7	-0.137099	0.0434855	-3.15275	0.0016174	0.0265335	Coding
Evl	252.083	-0.354014	0.112291	-3.15264	0.001618	0.0265335	Coding
Gzmn	10.3804	-1.46553	0.465013	-3.15159	0.00162382	0.0266008	Coding
Gm42701	17.2428	0.987008	0.313215	3.15122	0.00162593	0.0266072	Predicted
Smap1	1583	0.178067	0.0565398	3.14941	0.00163601	0.0267439	Coding
Cp	444.952	0.601289	0.191065	3.14704	0.00164934	0.0269334	Coding
Gstk1	128.65	0.380713	0.120994	3.14654	0.00165214	0.0269508	Coding
Nuak1	104.688	-0.530019	0.168643	-3.14285	0.00167312	0.0272644	Coding
Foxf1	24.1937	0.805297	0.256378	3.14106	0.00168338	0.0273452	Coding
Dpm1	187.517	0.331225	0.105444	3.14125	0.00168226	0.0273452	Coding
Klhdc3	204.193	-0.326139	0.103818	-3.14144	0.00168119	0.0273452	Coding
Gm6472	751.102	-0.200392	0.0638209	-3.1399	0.00169003	0.0274245	Predicted
P4ha2	2156.89	-0.403765	0.128633	-3.13889	0.00169589	0.0274908	Coding
Slc41a2	234.556	-0.429655	0.136897	-3.13853	0.00169799	0.027496	Coding
3632451O06Rik	289.945	-0.574827	0.183292	-3.13613	0.00171193	0.0276929	Coding
D130058E05Rik	10.7207	-1.63052	0.520031	-3.13542	0.00171609	0.0277024	Noncoding
Meox1	41.3039	-0.877303	0.279799	-3.13547	0.00171578	0.0277024	Coding
Gm37084	76.0134	0.536289	0.171095	3.13445	0.00172177	0.027765	Predicted
Egln3	72.2771	-0.8968	0.286172	-3.13378	0.00172568	0.0277993	Coding
Zfp804a	17.9508	-1.55346	0.495769	-3.13344	0.00172769	0.0278027	Coding
Traf3ip2	126.494	0.528408	0.168665	3.13289	0.00173095	0.0278263	Coding
H19	160.134	-1.50366	0.480122	-3.13183	0.00173718	0.0278685	Noncoding
Itsn1	361.658	-0.235089	0.0750636	-3.13186	0.00173702	0.0278685	Coding
Pim1	1479.1	0.467411	0.149262	3.13149	0.00173923	0.0278727	Coding
Ptges3l	144.447	-0.417346	0.133306	-3.13075	0.00174362	0.0279142	Coding
Rpl37a	26045.5	0.147897	0.0472651	3.12908	0.00175352	0.0280199	Ribosomal
Ddt	694.81	0.267012	0.0853338	3.12903	0.00175384	0.0280199	Coding
Prdx1	11511.6	0.331151	0.105862	3.12814	0.00175917	0.0280761	Coding
Tjp2	35.4712	-0.759138	0.242767	-3.12702	0.00176586	0.0281538	Coding
Ric8a	303.146	-0.261955	0.0838304	-3.12482	0.00177912	0.0283088	Coding
AC125149.3	4.28367	1.89791	0.607368	3.1248	0.00177923	0.0283088	Coding
Abca1	385.403	0.536205	0.171764	3.12175	0.0017978	0.0285748	Coding
Kcnj15	67.4554	-0.918334	0.294325	-3.12014	0.00180767	0.0287023	Coding
Zfand2a	102.299	0.437456	0.140231	3.11953	0.00181139	0.028732	Coding
Ubtd1	318.581	-0.34869	0.111797	-3.11896	0.00181492	0.0287585	Coding
Sgta	625.813	-0.208447	0.066877	-3.11687	0.0018278	0.028933	Coding
Nat8	11.6708	1.36654	0.438957	3.11316	0.00185095	0.0292696	Coding
Gm6265	207.431	0.318744	0.102407	3.11251	0.00185503	0.0293042	Predicted
Tmed3	5065.33	-0.262965	0.0845128	-3.11154	0.00186113	0.0293511	Coding
Gm43123	11.8236	1.1779	0.378571	3.11144	0.00186179	0.0293511	Predicted
Atp5k	2127.21	0.251184	0.0807418	3.11096	0.0018648	0.0293688	Coding
Ggta1	91.9195	0.439321	0.141231	3.11066	0.00186673	0.0293692	Coding
F730043M19Rik	184.933	0.504527	0.162229	3.10996	0.00187113	0.0294086	Noncoding
Slc29a3	109.747	-0.374412	0.12042	-3.10921	0.00187585	0.0294397	Coding
Gng11	1929.17	-0.468835	0.150797	-3.10905	0.00187691	0.0294397	Coding
Casp7	104.508	0.39735	0.127939	3.10578	0.00189776	0.0297367	Coding
Sema6c	42.7523	-0.622337	0.200468	-3.10442	0.00190653	0.0297838	Coding
Miat	20.3714	-1.05278	0.339096	-3.10466	0.00190498	0.0297838	Noncoding
Son	1721.38	0.147119	0.0473846	3.10478	0.0019042	0.0297838	Coding
Nap1l4	540.825	-0.258132	0.0832151	-3.10199	0.00192225	0.0299991	Coding
Gm16685	107.868	1.02783	0.331395	3.10153	0.0019252	0.030015	Predicted
Gck	11.2351	-1.33353	0.430038	-3.10095	0.00192901	0.0300441	Coding
Gm45684	28.986	1.14689	0.36993	3.10028	0.00193337	0.030064	Predicted
Plekhm1	65.4515	0.549113	0.177124	3.10016	0.00193417	0.030064	Coding
Msc	12.1299	-1.58308	0.510896	-3.09863	0.00194415	0.0301889	Coding
Rpl36al	1224.69	0.239282	0.0773974	3.0916	0.00199083	0.0308518	Ribosomal
Gm37644	128.761	0.44295	0.143271	3.09169	0.00199021	0.0308518	Predicted
Slc39a13	636.999	-0.263722	0.0853481	-3.08996	0.00200182	0.0309912	Coding
Rpn2	3043.23	-0.140255	0.0454003	-3.0893	0.0020063	0.0309986	Coding
Myo7a	77.8349	-0.714532	0.231277	-3.0895	0.00200494	0.0309986	Coding
Mex3d	148.928	-0.361659	0.117103	-3.08839	0.00201245	0.0310627	Coding
Gm42675	10.2852	1.27354	0.412424	3.08795	0.00201544	0.031078	Predicted
Pacsin3	104.376	-0.458197	0.148416	-3.08724	0.00202022	0.0311207	Coding
Eci1	275.097	0.287073	0.0930334	3.0857	0.00203074	0.0312517	Coding
Cox7a1	31.5826	-1.26742	0.410783	-3.08539	0.00203287	0.0312533	Coding
Dnajc8	962.1	0.184629	0.0598575	3.08448	0.00203909	0.0312869	Coding
Runx1	2328.24	-0.25837	0.0837577	-3.08473	0.00203737	0.0312869	Coding
Eva1a	25.6049	-1.04167	0.337774	-3.08391	0.00204297	0.0313154	Coding
Trim26	138.806	0.390064	0.126504	3.0834	0.00204647	0.0313381	Coding
Atp8b2	154.78	-0.33513	0.108767	-3.08117	0.00206187	0.0314632	Coding
Actr3	1400.59	-0.244165	0.0792298	-3.08173	0.00205799	0.0314632	Coding
Slc20a1	273.113	-0.594693	0.193017	-3.08104	0.00206276	0.0314632	Coding
Tshz2	1705.99	0.268447	0.0871222	3.08127	0.00206117	0.0314632	Coding
Lamtor3	161.683	-0.358771	0.116473	-3.08028	0.00206803	0.0315126	Coding
Rps10	13474.3	0.135551	0.0440278	3.07875	0.0020787	0.0316439	Ribosomal
Gpcpd1	115.043	0.361937	0.117583	3.07814	0.00208297	0.0316779	Coding
Scaf1	146.341	-0.355336	0.11548	-3.07703	0.00209072	0.0317645	Coding
CT010506.1	86.4571	0.534093	0.173699	3.07482	0.00210629	0.0319385	Noncoding
Sat1	2507.12	0.508661	0.165425	3.07488	0.00210588	0.0319385	Coding
Smim3	577.983	-0.551132	0.17939	-3.07226	0.00212447	0.0321826	Coding
Arpp19	1464.72	0.236559	0.0770556	3.06998	0.00214076	0.0322531	Coding
Ror2	148.46	-0.390748	0.127285	-3.06986	0.00214161	0.0322531	Coding
Bola3	920.379	0.260394	0.0848165	3.07008	0.00213998	0.0322531	Coding
Mfap3l	74.7229	0.5921	0.192827	3.07064	0.00213604	0.0322531	Coding
Gm42892	4.92251	1.87693	0.611343	3.07017	0.00213938	0.0322531	Predicted
Vdac1	1535.83	-0.282169	0.0919044	-3.07024	0.00213886	0.0322531	Coding
Atp5e	7163.72	0.204092	0.0665271	3.0678	0.00215642	0.0324447	Coding
Lamtor5	1156.36	0.155896	0.0508669	3.06479	0.00217824	0.0327412	Coding
Golt1b	702.003	-0.235173	0.0767989	-3.06219	0.00219726	0.0329016	Coding
Mindy1	228.103	0.354551	0.115765	3.06268	0.00219364	0.0329016	Coding
Ncs1	116.077	-0.582866	0.190349	-3.0621	0.00219791	0.0329016	Coding
Gm19705	52.0056	0.695774	0.227238	3.06188	0.00219952	0.0329016	Predicted
Fzd6	14.4273	-1.27813	0.417355	-3.06247	0.00219522	0.0329016	Coding
Gm44193	104.559	0.974775	0.318534	3.0602	0.00221191	0.032991	Predicted
Gpr137b	77.2263	0.441004	0.144107	3.06026	0.00221143	0.032991	Coding
Etfbkmt	57.8157	0.80222	0.262156	3.06009	0.00221271	0.032991	Coding
Ctif	99.4557	-0.461188	0.150719	-3.05991	0.00221402	0.032991	Coding
AA467197	640.707	1.62965	0.53287	3.05825	0.00222634	0.0331427	Coding
2810004N23Rik	318.619	0.265911	0.0869709	3.05747	0.00223217	0.0331976	Coding
Bend5	20.1215	-1.3375	0.437537	-3.05688	0.00223655	0.0332309	Coding
Cxcl5	8206.83	0.742671	0.243168	3.05415	0.00225702	0.0334881	Coding
Gm7676	47.9387	0.536854	0.175802	3.05375	0.00226002	0.0334881	Predicted
Dpysl3	1566.25	-0.471668	0.154458	-3.05371	0.00226034	0.0334881	Coding
Kpna2	65.0095	-0.631205	0.206865	-3.0513	0.00227856	0.0337113	Coding
Gm5430	9.38957	-1.25159	0.410206	-3.05114	0.00227976	0.0337113	Predicted
Adam19	701.965	-0.288568	0.0946442	-3.04898	0.00229621	0.0339222	Coding
Ddx18	406.974	0.313931	0.102978	3.04853	0.00229965	0.0339407	Coding
Ssu72	1177.6	0.240233	0.078835	3.04729	0.00230916	0.0340161	Coding
Atp11a	303.272	0.334954	0.109919	3.04729	0.00230914	0.0340161	Coding
Repin1	37.088	0.766342	0.252027	3.04072	0.00236014	0.0347258	Coding
Plvap	112.275	0.629535	0.207049	3.04051	0.00236181	0.0347258	Coding
Ly6c2	23.4262	0.910673	0.299624	3.03939	0.00237057	0.0348112	Coding
Rab2a	3175.94	-0.113403	0.0373136	-3.03919	0.00237211	0.0348112	Coding
Tmem199	111.311	0.395554	0.130202	3.038	0.00238158	0.034917	Coding
Gm42702	42.3313	0.632292	0.208379	3.03434	0.00241061	0.0353094	Predicted
Ctss	8.53529	1.21742	0.401301	3.03369	0.00241582	0.0353522	Coding
Cdk5rap3	559.537	-0.195253	0.0643897	-3.03237	0.00242643	0.0354739	Coding
Upf3b	185.254	0.339142	0.111915	3.03036	0.0024426	0.0356767	Coding
Hacd1	506.871	-0.344615	0.113762	-3.02925	0.0024516	0.0357744	Coding
Mrps18c	601.093	0.271293	0.0895672	3.02893	0.00245423	0.0357792	Coding
Colec12	1248.7	-0.422256	0.139432	-3.02841	0.00245845	0.0358069	Coding
A330069E16Rik	99.7117	0.782204	0.258407	3.02702	0.00246974	0.0359376	Noncoding
Msr1	16.0375	1.65547	0.546951	3.02673	0.00247214	0.0359388	Coding
Osbpl9	520.627	0.273681	0.090431	3.0264	0.00247481	0.0359438	Coding
Pappa	107.439	-1.11941	0.370321	-3.02282	0.00250431	0.0363383	Coding
Itgav	659.011	-0.351876	0.116454	-3.02159	0.00251449	0.0364178	Coding
Twsg1	696.155	0.298245	0.098697	3.02183	0.00251252	0.0364178	Coding
Etnk1	396.672	0.214476	0.0709919	3.02114	0.00251824	0.0364275	Coding
Selenom	5541.62	-0.246067	0.0814622	-3.02063	0.00252252	0.0364275	Coding
Cdk2	72.8172	-0.433854	0.143642	-3.02038	0.00252456	0.0364275	Coding
Usp9x	721.514	-0.272563	0.0902264	-3.02088	0.00252043	0.0364275	Coding
Olfml2b	1058.77	-0.344475	0.11414	-3.01801	0.00254437	0.0366451	Coding
Morf4l2	2296.96	-0.171981	0.0569845	-3.01802	0.00254429	0.0366451	Coding
Trp53i13	371.809	-0.343331	0.113779	-3.01754	0.00254839	0.0366689	Coding
Tfpi2	764.838	-0.612831	0.20312	-3.01708	0.00255219	0.0366895	Coding
Asah2	55.131	0.544388	0.180648	3.01353	0.00258226	0.0370874	Coding
Hdac3	284.448	-0.257156	0.0853694	-3.01227	0.002593	0.0371728	Coding
Papss2	188.644	-0.383038	0.127151	-3.01247	0.00259128	0.0371728	Coding
Rnaset2a	203.733	0.408883	0.135774	3.01149	0.00259967	0.037234	Coding
Ldlrad4	207.135	-0.346479	0.115079	-3.01079	0.00260571	0.0372859	Coding
Tbc1d1	96.6632	-0.457461	0.15197	-3.01021	0.00261071	0.0373008	Coding
Platr22	24.0078	0.827861	0.275049	3.00987	0.00261359	0.0373008	Noncoding
Isyna1	483.782	0.318432	0.105798	3.00983	0.00261397	0.0373008	Coding
Oaf	2301.31	-0.264477	0.0879152	-3.00832	0.00262694	0.0374514	Coding
Csnk1g2	469.698	-0.265575	0.0883023	-3.00757	0.00263346	0.0375098	Coding
Atp5j	3515.16	0.134398	0.0447304	3.00462	0.00265915	0.037841	Coding
Zfp532	69.2138	-0.445854	0.148451	-3.00338	0.00266999	0.0379604	Coding
Ccdc167	215.626	0.300559	0.100142	3.00134	0.00268799	0.0381812	Coding
Ucp2	958.85	-0.324756	0.108254	-2.99995	0.00270022	0.0383199	Coding
Gdf6	36.4056	-0.774682	0.258328	-2.99883	0.0027102	0.0384263	Coding
Dnajb6	1234.15	0.155498	0.0519023	2.99597	0.00273569	0.0387523	Coding
Rai1	117.784	-0.360427	0.120364	-2.99447	0.00274926	0.0389089	Coding
Kitl	413.288	0.542402	0.181191	2.99355	0.00275755	0.0389782	Coding
Kbtbd11	21.3718	-1.19426	0.398968	-2.99337	0.00275919	0.0389782	Coding
Golga7	655.392	-0.302055	0.100957	-2.99192	0.0027723	0.0391278	Coding
Msrb1	538.43	-0.193881	0.064808	-2.99163	0.00277495	0.0391288	Coding
Unc119	79.3533	-0.440253	0.147175	-2.99136	0.00277742	0.0391288	Coding
Ripk2	105.469	0.438784	0.146699	2.99105	0.00278023	0.0391329	Coding
Macc1	7.13484	1.34776	0.450709	2.99031	0.00278698	0.0391567	Coding
Ccl4	4.87176	3.12559	1.04515	2.99057	0.00278454	0.0391567	Coding
Gm42899	143.092	0.499012	0.166981	2.98843	0.00280414	0.0393621	Predicted
Gsdmd	445.355	0.383428	0.12832	2.98807	0.00280749	0.0393735	Coding
Dact3	172.447	-0.549998	0.184142	-2.98682	0.002819	0.0394278	Coding
Zc3hav1	429.316	0.314826	0.105404	2.98686	0.00281857	0.0394278	Coding
Cd52	9.45878	1.40059	0.46892	2.98684	0.0028188	0.0394278	Coding
H13	1235.58	-0.275928	0.0923983	-2.98629	0.00282388	0.0394316	Coding
Sema3a	111.161	0.485466	0.162583	2.98596	0.0028269	0.0394316	Coding
Trpc4ap	404.184	-0.219071	0.0733628	-2.98614	0.00282527	0.0394316	Coding
Adcy4	23.6149	-0.908222	0.304193	-2.98567	0.00282953	0.0394328	Coding
Stk16	378.955	-0.268995	0.0901115	-2.98514	0.0028345	0.0394666	Coding
Gclm	666.82	0.529269	0.177367	2.98403	0.00284481	0.0394926	Coding
Atg2b	83.7105	-0.451285	0.151227	-2.98416	0.00284358	0.0394926	Coding
Lmna	4790.14	-0.381089	0.127718	-2.98384	0.00284657	0.0394926	Coding
Cnih2	13.6832	-1.03679	0.347418	-2.98427	0.00284256	0.0394926	Coding
Twistnb	438.772	0.248757	0.0834467	2.98102	0.00287288	0.039822	Coding
Slc14a2	3.58796	-2.38353	0.799882	-2.97985	0.00288393	0.0399395	Coding
Cog6	167.677	-0.305412	0.102517	-2.97914	0.00289055	0.0399954	Coding
Ccdc28a	59.0298	0.502224	0.168636	2.97815	0.00289993	0.0400894	Coding
Gm5835	28.7392	-0.738666	0.248052	-2.97787	0.00290259	0.0400898	Predicted
Lrrfip1	387.018	-0.367516	0.123433	-2.97745	0.00290657	0.0400898	Coding
Dynap	54.9376	0.703971	0.236444	2.97733	0.00290772	0.0400898	Coding
Lgmn	1866.54	-0.291263	0.0978879	-2.97548	0.00292533	0.0402968	Coding
Colgalt1	1300.68	-0.167409	0.0562731	-2.97493	0.00293055	0.0403329	Coding
N4bp2	154.49	-0.371441	0.124923	-2.97336	0.00294557	0.0405036	Coding
Itgb7	26.5427	1.43777	0.483737	2.97222	0.00295659	0.0405831	Coding
Sox4	1896.92	-0.183992	0.0619022	-2.9723	0.00295574	0.0405831	Coding
Ercc1	907.671	-0.499513	0.168201	-2.96974	0.00298049	0.0408749	Coding
Herpud1	767.782	-0.310143	0.104474	-2.9686	0.00299158	0.0409908	Coding
Mzt1	374.39	-0.275136	0.0927823	-2.96539	0.00302297	0.0413842	Coding
Borcs6	131.486	-0.405228	0.136719	-2.96395	0.00303716	0.0414686	Coding
Mad2l2	194.352	0.386944	0.130541	2.96416	0.00303509	0.0414686	Coding
Ccdc102a	281.058	-0.334855	0.112958	-2.96442	0.00303254	0.0414686	Coding
Il1rap	334.937	0.24599	0.0830051	2.96355	0.00304114	0.0414809	Coding
Frmd3	5.58481	-1.64765	0.556014	-2.96332	0.00304341	0.0414809	Coding
Trib1	616.467	0.687974	0.232289	2.96172	0.00305928	0.0416606	Coding
Greb1l	33.0914	0.678893	0.229283	2.96094	0.00306701	0.0417291	Coding
Gm26518	49.3239	0.597978	0.201981	2.96057	0.00307066	0.0417422	Predicted
Gnb2	3694.89	-0.142996	0.0483379	-2.95825	0.0030939	0.0420212	Coding
Ggnbp2	746.129	0.209584	0.0708821	2.95679	0.00310856	0.0421464	Coding
Klf10	214.951	-0.341859	0.115609	-2.95703	0.00310617	0.0421464	Coding
Tmigd1	13.8335	1.03404	0.349804	2.95605	0.00311605	0.0422111	Coding
Gm8797	86.4674	0.405459	0.13718	2.95568	0.00311985	0.0422257	Predicted
Rps2	14917.3	-0.155657	0.0526852	-2.95447	0.00313203	0.042346	Ribosomal
Tspan6	664.474	-0.451765	0.15292	-2.95426	0.00313421	0.042346	Coding
Nsmce3	327.867	-0.220591	0.0746976	-2.95312	0.00314577	0.0424651	Coding
Smad3	175.569	0.390898	0.132462	2.95101	0.00316737	0.0427195	Coding
Tomm22	695.395	-0.172259	0.0583818	-2.95056	0.00317198	0.0427445	Coding
Elf1	579.058	0.294037	0.0996724	2.95003	0.0031774	0.0427803	Coding
Sarnp	710.238	0.208767	0.0707885	2.94917	0.00318629	0.0428628	Coding
Eif4g1	1159.88	-0.241435	0.081891	-2.94824	0.00319585	0.0429542	Coding
Hspd1-ps3	23.685	0.752812	0.255421	2.94733	0.00320528	0.0430435	Noncoding
Clic4	3117.61	0.570868	0.193711	2.94701	0.00320864	0.0430514	Coding
Hdlbp	3467	-0.146766	0.0498187	-2.94601	0.00321905	0.0431537	Coding
Actn1	1223.29	-0.401412	0.136307	-2.94492	0.00323035	0.0432123	Coding
Dennd1a	102.052	0.412252	0.139994	2.94478	0.00323179	0.0432123	Coding
Klf6	4469.95	0.413152	0.140295	2.94488	0.00323083	0.0432123	Coding
Adgrg6	29.7778	0.781778	0.265535	2.94416	0.00323835	0.0432627	Coding
Atxn7l1	286.765	0.398979	0.135551	2.94339	0.00324634	0.0433321	Coding
Rpp38	55.6145	0.57361	0.19497	2.94204	0.00326062	0.0434783	Coding
Lama1	7.62176	-1.90176	0.646458	-2.94182	0.00326291	0.0434783	Coding
Steap2	719.088	0.453085	0.15405	2.94115	0.00327	0.0435354	Coding
Luc7l2	887.762	-0.190662	0.0648463	-2.94022	0.00327981	0.0436286	Coding
Zcchc6	507.675	0.216248	0.0736407	2.93652	0.00331912	0.0441136	Coding
Nwd2	5.08009	-1.97538	0.673024	-2.93507	0.00333467	0.0442823	Coding
Bicd1	14.1604	1.02271	0.348565	2.93405	0.00334568	0.0443782	Coding
Ppp1r13l	33.5844	-0.807433	0.275211	-2.93387	0.00334763	0.0443782	Coding
Irx1	303.377	0.552188	0.188234	2.93351	0.0033515	0.0443917	Coding
Fpgs	125.499	-0.390298	0.133164	-2.93094	0.00337933	0.0446558	Coding
Nfatc2	10.3233	-1.28976	0.440059	-2.93087	0.00338009	0.0446558	Coding
Kcnk12	13.9742	-1.05977	0.361535	-2.93129	0.00337556	0.0446558	Coding
Ccl2	26852.5	0.695369	0.237361	2.92958	0.00339417	0.0447655	Coding
Gm39041	48.1508	0.643073	0.219504	2.92967	0.00339322	0.0447655	Predicted
Gm5523	17.3754	-0.828013	0.282741	-2.92852	0.00340575	0.0448801	Predicted
AL589871.2	34.829	1.1575	0.395341	2.92786	0.00341299	0.0449373	Noncoding
Gm16365	30.8573	0.727488	0.248504	2.92747	0.00341729	0.0449557	Predicted
Gm43489	141.048	0.595976	0.203628	2.92679	0.00342479	0.0450161	Predicted
C4b	4438.12	0.580151	0.198288	2.92581	0.00343566	0.0450825	Coding
9330154J02Rik	99.2891	0.387711	0.132503	2.92605	0.00343299	0.0450825	Noncoding
Slc8b1	28.5761	0.627964	0.214751	2.92415	0.00345402	0.045285	Coding
Ppp1cb	757.216	-0.185158	0.063337	-2.92338	0.00346258	0.0453589	Coding
Rpl31	5170.92	0.139236	0.0476385	2.92276	0.00346942	0.0453735	Ribosomal
Dnm3	42.9551	-0.605589	0.207198	-2.92275	0.00346955	0.0453735	Coding
Sash1	593.762	0.522248	0.178722	2.92212	0.00347655	0.0454268	Coding
Pgf	592.727	-1.47055	0.503386	-2.92132	0.00348552	0.0455055	Coding
Tet3	153.102	-0.307361	0.105285	-2.91933	0.0035078	0.0457562	Coding
Vapb	732.058	-0.182428	0.0624949	-2.91908	0.00351063	0.0457562	Coding
Gm12312	12.6775	-0.997973	0.342008	-2.91798	0.00352305	0.0458153	Predicted
Oaz2	419.314	-0.29353	0.100605	-2.91763	0.00352699	0.0458153	Coding
Ptk7	328.683	-0.503737	0.172652	-2.91763	0.00352699	0.0458153	Coding
Vps37c	28.1467	-0.708545	0.242795	-2.91829	0.00351959	0.0458153	Coding
Pofut2	1346.34	-0.285717	0.0979662	-2.91648	0.00354005	0.0459351	Coding
Aox3	16.0024	1.1896	0.407916	2.9163	0.00354213	0.0459351	Coding
Pcgf2	84.8215	-0.407403	0.139773	-2.91475	0.00355969	0.0461242	Coding
Aplp1	37.4105	-1.0073	0.34568	-2.91396	0.00356881	0.0462037	Coding
Ryk	1515.93	-0.176661	0.0606891	-2.91092	0.00360363	0.0466155	Coding
AC151730.2	5.24303	1.62919	0.559757	2.91054	0.00360809	0.0466343	Noncoding
Rtkn	59.6082	-0.530963	0.182454	-2.91013	0.00361282	0.0466401	Coding
B4galt7	181.44	-0.280155	0.096274	-2.90998	0.00361455	0.0466401	Coding
Elob	5001.4	0.1179	0.0405198	2.90968	0.00361796	0.0466452	Coding
2610528A11Rik	16.6907	-3.45689	1.18837	-2.90893	0.00362664	0.0467119	Coding
Gm43484	33.3376	0.635877	0.218611	2.90872	0.00362916	0.0467119	Predicted
Tmeff1	271.022	-0.469461	0.161425	-2.90823	0.00363485	0.0467463	Coding
Slco5a1	59.1132	-0.885753	0.304642	-2.90752	0.0036431	0.0468135	Coding
Rpl13a	1102	-0.217996	0.0749943	-2.90684	0.003651	0.0468762	Ribosomal
Dap	2346.58	-0.170348	0.0586177	-2.90608	0.00365989	0.0469514	Coding
Mum1l1	27.5417	-1.03835	0.357485	-2.9046	0.00367727	0.0471105	Coding
Bckdhb	721.132	0.567736	0.195467	2.9045	0.00367837	0.0471105	Coding
Gm42462	15.6479	0.90057	0.31061	2.89936	0.00373924	0.0478506	Predicted
Cgnl1	83.3249	0.609105	0.210121	2.89883	0.00374553	0.047889	Coding
Pyurf	124.344	-0.416258	0.143607	-2.89859	0.00374842	0.047889	Coding
Brd4	594.218	0.17695	0.0610583	2.89805	0.00375494	0.0479327	Coding
Tpi1	4436.6	-0.454205	0.15675	-2.89764	0.00375978	0.047955	Coding
Gm37420	48.2257	0.682701	0.235628	2.89737	0.00376311	0.047958	Predicted
Ifi204	1678.31	0.370674	0.127963	2.89673	0.00377068	0.048015	Coding
Mtf2	174.65	0.320525	0.110715	2.89506	0.00379088	0.0482326	Coding
Itgb5	1138.98	-0.321193	0.110977	-2.89422	0.00380106	0.0483225	Coding
Epas1	681.51	0.509076	0.175989	2.89266	0.00381999	0.0485233	Coding
Sart1	189.878	-0.322883	0.111672	-2.89137	0.0038357	0.048683	Coding
Islr2	56.6197	-1.13422	0.392348	-2.89086	0.00384191	0.0487218	Coding
Gm45204	8.81667	1.32855	0.459618	2.89055	0.00384568	0.0487298	Predicted
Vasp	588.105	-0.304409	0.105334	-2.88994	0.00385318	0.0487849	Coding
Asph	686.631	-0.236049	0.0816875	-2.88966	0.00385664	0.0487888	Coding
Arap1	307.753	-0.384233	0.132992	-2.88914	0.00386294	0.0488287	Coding
Atp2c1	321.051	-0.234528	0.0812046	-2.88811	0.00387569	0.0489499	Coding
Phldb1	213.028	-0.418072	0.144774	-2.88776	0.00387999	0.0489643	Coding
Spp1	31508.2	-1.22509	0.424279	-2.88746	0.00388367	0.0489709	Coding
Wrn	104.664	0.353805	0.122582	2.88627	0.00389836	0.0491161	Coding
Acads	302.722	-0.22851	0.079208	-2.88494	0.00391493	0.0492291	Coding
Cxcl16	961.288	0.453327	0.157144	2.88478	0.00391686	0.0492291	Coding
Arl2	360.832	0.226468	0.0785029	2.88484	0.00391615	0.0492291	Coding
2900026A02Rik	65.8591	-0.54868	0.190316	-2.88299	0.00393917	0.0494694	Coding
Cers5	389.645	-0.235575	0.0817245	-2.88254	0.00394478	0.0494998	Coding
Prrg3	131.538	0.525382	0.182499	2.87882	0.0039917	0.050048	Coding
Cstb	3935.14	0.230449	0.080079	2.87777	0.00400491	0.0500921	Coding
Gmppb	680.378	-0.241547	0.0839333	-2.87785	0.004004	0.0500921	Coding
Cd14	121.076	0.602406	0.209315	2.87799	0.00400219	0.0500921	Coding
Cnpy4	268.057	-0.260902	0.0906878	-2.87692	0.00401579	0.0501876	Coding
Lsp1	2255.23	-0.243887	0.0847959	-2.87616	0.00402541	0.0502269	Coding
Gm4459	36.9491	-0.598734	0.208161	-2.8763	0.00402369	0.0502269	Predicted
AC140299.2	26.7754	0.882435	0.306931	2.87503	0.00403989	0.0503619	Noncoding
Gm10524	13.1175	-0.999999	0.347849	-2.87481	0.00404273	0.0503619	Predicted
Uck1	103.993	-0.365595	0.127194	-2.87432	0.00404901	0.0503996	Coding
Ereg	822.761	0.837822	0.291563	2.87355	0.00405884	0.0504814	Coding
Auh	401.141	0.289826	0.100875	2.87311	0.00406448	0.050511	Coding
Fgf11	45.1619	-0.714627	0.24889	-2.87126	0.00408841	0.0507677	Coding
Copb2	2001.86	-0.169055	0.0588925	-2.87056	0.00409741	0.0508387	Coding
Csrp1	1207.47	-0.519584	0.181021	-2.87029	0.00410096	0.050842	Coding
Psrc1	39.8756	0.6918	0.241234	2.86775	0.004134	0.0512108	Coding
Hipk2	157.885	0.436211	0.152197	2.86609	0.00415573	0.0513978	Coding
Pcdh1	28.6337	0.827867	0.288833	2.86625	0.00415364	0.0513978	Coding
Eif1-ps1	239.215	-0.354227	0.123606	-2.86577	0.00415992	0.0514085	Noncoding
Gm6710	109.873	-0.377078	0.131598	-2.86537	0.00416523	0.0514331	Predicted
Lcn2	1652.31	1.33611	0.466439	2.86449	0.0041768	0.0515011	Coding
Tnks	298.397	-0.232246	0.0810789	-2.86445	0.00417738	0.0515011	Coding
Pcdhgb8	4.70783	1.73887	0.60734	2.8631	0.00419523	0.0516707	Coding
AC153524.4	38.8475	0.62315	0.217664	2.8629	0.00419781	0.0516707	Noncoding
9530068E07Rik	1393.67	-0.203524	0.0711034	-2.86236	0.00420495	0.0517175	Coding
B4galt2	254.933	-0.296502	0.103599	-2.86202	0.00420953	0.0517328	Coding
Gm12696	49.6707	-0.491373	0.171761	-2.8608	0.00422579	0.0518915	Predicted
Klf7	670.339	0.28234	0.0987371	2.85951	0.00424292	0.0520606	Coding
Tshz1	280.317	0.290546	0.101696	2.85701	0.00427649	0.052431	Coding
Lonp1	257.378	-0.335675	0.117523	-2.85624	0.00428687	0.0525167	Coding
C1qtnf4	20.2463	-0.81262	0.284534	-2.85597	0.0042906	0.0525209	Coding
Tmem214	502.337	-0.181262	0.0634839	-2.85524	0.00430041	0.0525994	Coding
Cdan1	22.5435	-0.775581	0.271828	-2.8532	0.0043281	0.0528546	Coding
Slc25a28	259.459	0.2889	0.101251	2.85329	0.0043269	0.0528546	Coding
Mocos	36.5348	0.711728	0.24953	2.85228	0.00434071	0.0529669	Coding
Sox8	3.97761	-2.10355	0.737641	-2.85173	0.00434826	0.0530173	Coding
Gngt2	760.481	0.536	0.188015	2.85084	0.00436042	0.0531237	Coding
Fkbp9	2566.16	-0.275707	0.0967593	-2.84941	0.00437998	0.0533202	Coding
Npc2	9763.32	0.355576	0.124842	2.8482	0.00439667	0.0534813	Coding
Gpr18	33.3855	0.610715	0.214596	2.84588	0.00442884	0.0538304	Coding
Smim7	803.372	-0.19799	0.0696762	-2.84158	0.00448912	0.0545203	Coding
Atp6v0e2	12.4283	1.03556	0.364496	2.84107	0.0044962	0.0545635	Coding
Gpat4	282.888	-0.229169	0.0806782	-2.84053	0.0045039	0.0546142	Coding
Bbs5	82.1471	-0.408169	0.143785	-2.83875	0.00452911	0.0548769	Coding
Ifi208	13.583	1.19591	0.421407	2.83791	0.00454104	0.0549786	Coding
Gm43259	39.8453	0.565556	0.19942	2.83601	0.00456809	0.0551337	Predicted
Armcx2	297.939	-0.266888	0.0941032	-2.83612	0.00456656	0.0551337	Coding
Timm8b	1159.5	0.163026	0.0574712	2.83666	0.00455887	0.0551337	Coding
Man1c1	201.968	-0.328575	0.115839	-2.83647	0.00456146	0.0551337	Coding
Gm9800	112.924	0.486436	0.171591	2.83486	0.00458458	0.0552288	Predicted
Slc9b2	37.3685	-0.839108	0.296015	-2.83468	0.00458716	0.0552288	Coding
Akt1s1	497.899	-0.237857	0.0839232	-2.83422	0.00459379	0.0552288	Coding
Gm44148	21.415	0.791639	0.279292	2.83445	0.00459041	0.0552288	Predicted
3010003L21Rik	9.9889	-1.18177	0.416943	-2.83437	0.00459154	0.0552288	Noncoding
Zcchc11	283.74	0.231232	0.0815945	2.83392	0.00459808	0.0552375	Coding
9430034N14Rik	56.6944	0.549806	0.194034	2.83356	0.00460329	0.0552573	Noncoding
Kcnq3	8.20311	-1.70376	0.601469	-2.83267	0.00461614	0.0553687	Coding
Lrrc75b	6.29362	-1.44816	0.511439	-2.83155	0.00463233	0.0555199	Coding
Ppib	11460.7	-0.204558	0.0722559	-2.83102	0.00464001	0.055526	Coding
Kat2b	282.132	0.241127	0.0851723	2.83105	0.00463952	0.055526	Coding
Mthfd1l	146.869	-0.594197	0.209947	-2.83023	0.00465148	0.0556203	Coding
Ext2	857.971	-0.172356	0.0609292	-2.8288	0.00467228	0.055826	Coding
Fgfrl1	82.9433	-0.424263	0.150021	-2.82803	0.00468355	0.0559175	Coding
Adamtsl3	34.9768	-1.09178	0.386089	-2.82778	0.00468716	0.0559176	Coding
Ampd3	103.151	0.811879	0.287156	2.82731	0.0046941	0.0559429	Coding
Gm43360	36.3936	0.544727	0.192677	2.82715	0.0046965	0.0559429	Predicted
Fabp4	366.949	-0.577067	0.204138	-2.82685	0.00470083	0.0559515	Coding
St6galnac6	161.083	-0.307297	0.108741	-2.82596	0.00471388	0.0560637	Coding
Apobec3	122.398	0.336492	0.119162	2.82383	0.00474542	0.0563955	Coding
Lrrc9	8.19586	1.38222	0.489532	2.82355	0.00474946	0.0564003	Coding
Ktn1	608.648	0.314654	0.111459	2.82304	0.00475707	0.0564042	Coding
Gjb4	16.7838	-0.939333	0.332733	-2.82308	0.00475647	0.0564042	Coding
Yes1	137.999	-0.305831	0.108366	-2.82219	0.00476963	0.0565099	Coding
Gm24405	3.78065	-2.17892	0.772164	-2.82184	0.00477496	0.0565299	Predicted
Nrp1	517.852	-0.372293	0.131968	-2.82108	0.00478625	0.0566203	Coding
BC023105	23.0126	0.77589	0.275131	2.82007	0.00480126	0.0567545	Noncoding
Gm4149	297.041	0.217476	0.0771307	2.81958	0.00480869	0.056799	Predicted
Acsl5	418.458	0.342814	0.121601	2.81917	0.00481475	0.0568273	Coding
Crabp2	200.829	0.437829	0.155327	2.81876	0.00482096	0.0568573	Coding
Dock7	418.748	-0.224698	0.0797458	-2.81768	0.00483724	0.0570058	Coding
Fam98b	188.182	0.269688	0.0958009	2.81508	0.00487645	0.0574243	Coding
Wnk4	4.91407	-1.86799	0.663628	-2.81481	0.00488066	0.0574302	Coding
AL589661.1	11.0718	1.0394	0.369376	2.81393	0.004894	0.0575435	Noncoding
Pon2	419.972	-0.233725	0.0830971	-2.81267	0.00491317	0.0577251	Coding
Atf3	1915.5	0.731346	0.260041	2.81243	0.00491691	0.0577252	Coding
Gnptab	211.485	0.346944	0.123382	2.81195	0.00492419	0.057767	Coding
Ptov1	1275.71	-0.198027	0.0705369	-2.80742	0.00499395	0.058541	Coding
Alyref	598.761	-0.40458	0.144148	-2.80669	0.00500531	0.0586299	Coding
Rab32	459.052	0.566816	0.20199	2.80616	0.00501364	0.058683	Coding
Rfxap	259.232	-0.268202	0.0956044	-2.80533	0.00502648	0.0587889	Coding
Ppp1cc	648.834	-0.169527	0.0604474	-2.80454	0.00503889	0.0588896	Coding
Csf3	475.978	1.32839	0.473929	2.80292	0.00506416	0.0590546	Coding
Gm11131	22.3112	0.724053	0.258331	2.80281	0.00506591	0.0590546	Predicted
Shroom1	6.71682	-1.61499	0.576234	-2.80266	0.00506825	0.0590546	Coding
Pced1b	7.69525	1.23681	0.441186	2.80338	0.00505703	0.0590546	Coding
Cpeb3	55.6089	0.459912	0.164141	2.80193	0.00507984	0.0591452	Coding
Gm12216	77.1839	0.892456	0.318546	2.80165	0.00508412	0.0591507	Predicted
Gm20796	3.87654	1.74413	0.622591	2.80141	0.00508797	0.059151	Predicted
Hpse	389.22	0.391631	0.139836	2.80064	0.00510018	0.0592484	Coding
Tet1	18.6305	-1.02487	0.366004	-2.80017	0.00510758	0.05929	Coding
Clk1	434.829	0.396311	0.141768	2.7955	0.00518199	0.0601088	Coding
Mdga1	91.2471	-0.470746	0.16851	-2.79358	0.00521274	0.0603901	Coding
Vcl	644.286	-0.36604	0.131033	-2.7935	0.00521403	0.0603901	Coding
Gm43260	46.1849	0.637111	0.228122	2.79285	0.00522462	0.0604675	Predicted
Bag2	137.937	-0.3519	0.126017	-2.79248	0.00523061	0.0604916	Coding
Tmbim6	2719.13	0.132859	0.0475884	2.79184	0.00524089	0.0605375	Coding
Ptch2	65.9575	0.741545	0.26562	2.79175	0.00524239	0.0605375	Coding
Kctd10	455.985	-0.232108	0.08315	-2.79143	0.0052475	0.0605514	Coding
Adamts1	2292.54	0.487736	0.174815	2.79	0.00527075	0.0607744	Coding
Rassf1	701.209	-0.329366	0.118103	-2.7888	0.00529038	0.0609554	Coding
Hsp90aa1	9586.56	0.390281	0.140012	2.78747	0.00531209	0.060995	Coding
Ccnl1	1029.12	0.437852	0.157051	2.78796	0.00530412	0.060995	Coding
Dse	801.205	0.150809	0.054101	2.78754	0.00531094	0.060995	Coding
Fam217b	37.6146	-0.671014	0.240732	-2.78739	0.00531349	0.060995	Coding
H2-Q4	905.919	0.449957	0.161399	2.78786	0.00530571	0.060995	Coding
Ncam1	567.715	-0.691131	0.248068	-2.78605	0.00533542	0.0612014	Coding
Bgn	32412.4	-0.275794	0.0990348	-2.78482	0.00535571	0.0613886	Coding
Tha1	67.9082	0.545909	0.196092	2.78394	0.00537038	0.0615113	Coding
Kdelr1	2588.33	-0.127108	0.045676	-2.78281	0.00538901	0.0616791	Coding
Fam204a	480.54	0.245954	0.0884102	2.78197	0.00540302	0.0617938	Coding
Camk4	18.902	-2.08839	0.751015	-2.78076	0.00542315	0.0619783	Coding
Tsc22d4	554.986	0.175444	0.0631017	2.78034	0.00543026	0.0620138	Coding
Ost4	3936.91	-0.15869	0.057099	-2.77921	0.00544911	0.0621832	Coding
Cmklr1	36.9042	-0.891598	0.320898	-2.77845	0.00546196	0.062284	Coding
Mgst1	6579.75	0.287297	0.103487	2.77618	0.00550021	0.062582	Coding
Ubl3	318.453	0.265379	0.0955866	2.77632	0.00549779	0.062582	Coding
Msln	29.5345	0.624095	0.224788	2.77637	0.00549694	0.062582	Coding
Ccdc68	116.561	0.989141	0.356542	2.77426	0.00553271	0.0629057	Coding
Praf2	831.361	-0.182963	0.0659824	-2.77291	0.00555581	0.063122	Coding
Gm13573	31.8473	0.592444	0.213715	2.77212	0.0055693	0.0632289	Predicted
Gm10184	3.50521	-2.319	0.836849	-2.77111	0.00558651	0.0633778	Predicted
St6galnac5	11.4611	1.03847	0.374993	2.76931	0.00561752	0.06359	Coding
Fbxo6	261.492	0.348377	0.125792	2.76947	0.00561483	0.06359	Coding
Atp1a1	1007.63	-0.214425	0.0774255	-2.76943	0.00561537	0.06359	Coding
Far2os1	20.5936	-1.18743	0.42883	-2.76901	0.0056227	0.0636022	Noncoding
Mplkip	352.97	0.234044	0.0845404	2.76843	0.00563265	0.0636219	Coding
Zfp414	109.716	0.329097	0.118871	2.76851	0.00563129	0.0636219	Coding
Frk	156.322	-0.319302	0.115388	-2.76719	0.00565412	0.0638179	Coding
Tlr2	103.895	0.53103	0.191999	2.7658	0.00567831	0.0640442	Coding
Gm15920	410.199	0.270928	0.0980794	2.76233	0.005739	0.0646817	Predicted
Gm43359	90.2437	0.436788	0.158158	2.76171	0.00574989	0.0647573	Predicted
Art2a-ps	25.0961	0.901773	0.326653	2.76065	0.00576873	0.0649223	Coding
Rps21	21363.4	0.138643	0.0502311	2.7601	0.00577836	0.0649835	Ribosomal
Nfic	1057.86	-0.225124	0.0816011	-2.75883	0.00580086	0.0649841	Coding
Bhlhe41	92.1534	-0.624043	0.226211	-2.75868	0.00580358	0.0649841	Coding
Gm10263	17.9087	0.843034	0.30547	2.75979	0.0057838	0.0649841	Predicted
Golim4	743.11	-0.195249	0.070774	-2.75876	0.00580208	0.0649841	Coding
Tvp23a	100.275	0.603324	0.218657	2.75923	0.00579375	0.0649841	Coding
B930086L07Rik	69.4363	0.428144	0.155198	2.75869	0.00580337	0.0649841	Noncoding
Adm2	41.7308	-1.34201	0.486844	-2.75655	0.00584145	0.065361	Coding
Mn1	47.8668	-0.748436	0.27178	-2.75383	0.00589029	0.0658599	Coding
Qsox1	570.467	-0.211488	0.0768118	-2.75333	0.00589929	0.065913	Coding
Plekha7	3.90066	-2.08346	0.756925	-2.75253	0.00591358	0.0659776	Coding
Kif18b	8.81594	-1.14071	0.414402	-2.75267	0.00591113	0.0659776	Coding
Moxd1	31.2009	-1.59035	0.577848	-2.75219	0.00591987	0.0660001	Coding
Banp	96.649	-0.453722	0.164875	-2.75192	0.00592477	0.0660073	Coding
Hist1h1c	344.56	-0.312648	0.113634	-2.75137	0.00593471	0.0660706	Coding
Abi1	604.542	0.24533	0.0891831	2.75085	0.00594404	0.0661269	Coding
Itga9	243.423	0.325133	0.118335	2.74756	0.00600414	0.0667476	Coding
Ifnar2	780.407	0.397545	0.144801	2.74546	0.00604261	0.0671271	Coding
Nfkbie	160.402	0.298293	0.108691	2.74442	0.00606175	0.0672915	Coding
Lamtor1	1009.75	-0.163879	0.0597304	-2.74365	0.00607605	0.0674019	Coding
Gm19391	11.8628	-1.16134	0.42347	-2.74244	0.00609848	0.067554	Predicted
Coq2	167.784	-0.278473	0.101539	-2.74251	0.00609709	0.067554	Coding
Dbn1	717.113	-0.234996	0.085717	-2.74154	0.00611522	0.0676911	Coding
Pkn2	664.099	0.19307	0.0704462	2.74067	0.00613144	0.0677739	Coding
Ptger3	68.8973	-0.944767	0.344707	-2.74078	0.00612933	0.0677739	Coding
Ephb3	110.352	-0.584524	0.213312	-2.74023	0.0061397	0.0678168	Coding
4933400C23Rik	25.5217	0.865398	0.315867	2.73975	0.00614855	0.0678662	Noncoding
Mex3a	87.8854	-0.534258	0.19502	-2.7395	0.00615318	0.0678689	Coding
Taf13	255.778	-0.240923	0.0879843	-2.73825	0.00617679	0.0680808	Coding
Sh3kbp1	336.021	-0.341885	0.124918	-2.73687	0.00620271	0.068318	Coding
Lrfn4	59.9351	-0.422726	0.154473	-2.73657	0.00620842	0.0683323	Coding
Wls	1406.22	-0.237429	0.0867755	-2.73613	0.00621666	0.0683744	Coding
Rnf5	161.347	-0.315715	0.115438	-2.73492	0.00623957	0.0685768	Coding
Hs3st1	207.194	0.635609	0.232425	2.73469	0.00624391	0.0685768	Coding
Lingo1	12.5768	-1.25829	0.460269	-2.73381	0.00626056	0.0687109	Coding
Vhl	160.318	-0.356484	0.130494	-2.73181	0.00629871	0.0690807	Coding
Endog	197.896	-0.26195	0.0959247	-2.73079	0.00631836	0.0691983	Coding
Dtwd1	137.411	0.354563	0.129837	2.73084	0.00631724	0.0691983	Coding
Gm13456	55.473	-0.488758	0.179035	-2.72996	0.00633425	0.0693234	Predicted
C1qtnf6	2390.83	-0.376305	0.137906	-2.72872	0.00635816	0.0694869	Coding
Hs6st2	492.243	-0.474224	0.173789	-2.72873	0.00635783	0.0694869	Coding
Gla	167.879	0.35842	0.131367	2.72839	0.00636443	0.0695064	Coding
Scara5	498.284	0.667529	0.24475	2.72739	0.00638379	0.0696687	Coding
Xpot	260.484	-0.245082	0.0898764	-2.72688	0.00639364	0.0697271	Coding
Gm10704	27.8894	-0.624695	0.229112	-2.72659	0.00639928	0.0697396	Predicted
Myo1e	153.139	-0.367976	0.134994	-2.72586	0.00641338	0.069844	Coding
Dnajb1	4331.97	0.597244	0.219178	2.72492	0.00643171	0.0699659	Coding
Naa38	739.649	0.186951	0.0686105	2.72482	0.00643359	0.0699659	Coding
Gclc	197.265	0.368674	0.135353	2.72379	0.00645383	0.070125	Coding
Slc25a32	83.5646	-0.377754	0.138696	-2.72361	0.00645727	0.070125	Coding
Cdk16	477.455	-0.221912	0.0815083	-2.72257	0.00647758	0.0702963	Coding
Gm44639	125.024	0.465729	0.171117	2.7217	0.00649472	0.0704329	Predicted
Ptbp1	936.459	-0.236267	0.0868395	-2.72073	0.00651378	0.0705583	Coding
Mapkapk2	601.137	-0.254411	0.093511	-2.72065	0.00651538	0.0705583	Coding
Spcs3	537.772	-0.214938	0.0790672	-2.71842	0.00655955	0.0709869	Coding
Dtx4	93.5772	0.386715	0.142375	2.71617	0.00660415	0.0714198	Coding
Irak2	92.4754	-0.374906	0.138054	-2.71564	0.00661477	0.0714847	Coding
Gm17501	38.2904	0.56322	0.207431	2.71521	0.00662334	0.0715275	Predicted
Ccdc85a	25.0312	0.860108	0.316928	2.71389	0.00664977	0.0717629	Coding
Gkap1	275.13	0.267596	0.09862	2.71341	0.0066595	0.0718178	Coding
Ndufs7	1325.7	0.14433	0.0532022	2.71286	0.00667062	0.0718612	Coding
Stambpl1	176.575	0.297744	0.109757	2.71275	0.00667279	0.0718612	Coding
Nxph4	21.7457	-1.28549	0.474072	-2.71159	0.00669608	0.072062	Coding
Nelfb	267.967	-0.255045	0.0941587	-2.70867	0.0067553	0.0726488	Coding
Lepr	11.4241	1.08842	0.4021	2.70684	0.00679263	0.0729644	Coding
Tnrc6c	524.321	-0.238589	0.0881452	-2.70677	0.00679407	0.0729644	Coding
Rrp7a	357.982	-0.25206	0.0931579	-2.70572	0.00681556	0.0730434	Coding
Mgat1	498.725	-0.207718	0.0767651	-2.70589	0.00681221	0.0730434	Coding
Mapre2	415.244	0.257537	0.0951733	2.70598	0.00681032	0.0730434	Coding
Gm12338	41.767	0.528704	0.195515	2.70417	0.00684759	0.0733359	Predicted
Acaa1b	42.1337	-0.526634	0.194901	-2.70206	0.00689108	0.0737507	Coding
Map1b	776.946	-0.22357	0.0827554	-2.70158	0.0069011	0.073807	Coding
F2rl1	108.845	-0.733755	0.271783	-2.69979	0.0069384	0.0741548	Coding
Cwf19l2	157.703	0.320775	0.118868	2.69859	0.00696346	0.0743357	Coding
Atp6v0d1	757.706	-0.157442	0.0583441	-2.69852	0.00696493	0.0743357	Coding
Fam104a	1336.43	0.200266	0.0742853	2.6959	0.00701978	0.0748696	Coding
Fam212a	61.7977	-0.437309	0.162247	-2.69532	0.00703208	0.0749492	Coding
Mbd3	1015.47	-0.226172	0.0839339	-2.69464	0.00704641	0.0750503	Coding
Gm2962	5.09655	-1.60607	0.596795	-2.69115	0.0071206	0.0757213	Predicted
Ngef	8.11511	-1.42001	0.527666	-2.69111	0.00712137	0.0757213	Coding
Peli2	92.8573	0.46036	0.171075	2.69099	0.00712406	0.0757213	Coding
Rsph1	37.074	-0.549301	0.204144	-2.69075	0.00712915	0.0757234	Coding
Ormdl3	486.975	-0.266684	0.09915	-2.6897	0.00715156	0.0759094	Coding
Rnasel	89.7885	0.469312	0.17452	2.68915	0.00716334	0.0759824	Coding
Rcor1	289.657	-0.235853	0.0877443	-2.68796	0.00718904	0.0761508	Coding
Psmd9	410.311	-0.212959	0.0792216	-2.68814	0.00718507	0.0761508	Coding
Zfp939	8.28272	-1.16411	0.433242	-2.68698	0.0072101	0.0763217	Noncoding
Ppic	4956.73	-0.33727	0.125554	-2.68626	0.00722574	0.076435	Coding
Gale	48.5972	-0.599008	0.223073	-2.68526	0.00724737	0.0766115	Coding
G6pdx	157.199	0.346517	0.129078	2.68455	0.00726268	0.076721	Coding
Rabac1	2644.74	-0.192491	0.071717	-2.68404	0.00727383	0.0767342	Coding
Gemin7	513.134	-0.169184	0.0630303	-2.68416	0.00727119	0.0767342	Coding
Cadm1	9.11401	1.15162	0.429166	2.6834	0.00728782	0.0768295	Coding
Zbtb41	169.487	-0.263086	0.0981413	-2.68069	0.00734704	0.0774011	Coding
Impdh1	270.709	-0.328389	0.122529	-2.68009	0.00736015	0.077434	Coding
Gm4691	4.27103	-1.83894	0.686124	-2.68019	0.00735814	0.077434	Predicted
Ly96	169.051	0.313158	0.116878	2.67936	0.00737627	0.0774459	Coding
Smarce1	266.711	-0.235489	0.0878796	-2.67968	0.00736924	0.0774459	Coding
Itga5	893.707	-0.416924	0.155594	-2.67957	0.00737179	0.0774459	Coding
Ppp3r1	482.017	-0.225314	0.0841078	-2.67887	0.00738701	0.0774537	Coding
9530013L04Rik	121.691	0.364875	0.136195	2.67907	0.00738269	0.0774537	Noncoding
Ifitm5	18.4522	0.756884	0.282667	2.67765	0.007414	0.0776841	Coding
Arhgef28	78.7407	-0.465558	0.173954	-2.67633	0.00744336	0.077939	Coding
Gm38248	18.3398	0.724242	0.270731	2.67513	0.00747001	0.0781652	Predicted
CT009757.7	64.5861	0.404889	0.151373	2.67478	0.00747789	0.078195	Noncoding
Flot1	662.35	0.191866	0.0717773	2.67308	0.00751582	0.0785385	Coding
Gm42480	44.543	0.55099	0.206243	2.67156	0.00754996	0.0788391	Predicted
Gm42576	73.1644	0.40892	0.153089	2.67112	0.00755979	0.0788391	Predicted
Sft2d1	42.5153	-0.486656	0.182192	-2.67112	0.00755984	0.0788391	Coding
Gm43794	46	-0.47073	0.176366	-2.66905	0.00760654	0.0792728	Predicted
Dhx58os	82.097	-0.405731	0.152091	-2.66769	0.00763752	0.0794886	Noncoding
Gal	5.08738	-1.98107	0.742578	-2.66782	0.00763441	0.0794886	Coding
Lifr	398.683	0.246318	0.0923495	2.66724	0.00764771	0.0795414	Coding
Atp6v1d	431.02	0.189409	0.0710228	2.66688	0.00765598	0.079574	Coding
Gja4	9.30466	1.68275	0.631098	2.66638	0.00766725	0.0796377	Coding
Gm11110	38.825	-0.588516	0.220811	-2.66525	0.00769306	0.0798522	Predicted
Dhx15	615.359	-0.19814	0.0743775	-2.66398	0.00772233	0.0801024	Coding
Slc35b2	572.894	-0.23798	0.089396	-2.66209	0.00776568	0.0804444	Coding
Ankrd37	134.976	-0.456407	0.171443	-2.66216	0.00776417	0.0804444	Coding
Gm37399	33.3675	0.659169	0.247769	2.66042	0.00780443	0.0807378	Predicted
Tiparp	615.55	0.422459	0.158781	2.66064	0.00779932	0.0807378	Coding
Slc7a6	200.67	-0.242705	0.0912686	-2.65924	0.00783171	0.080912	Coding
Gpr180	697.798	-0.19521	0.0734072	-2.65928	0.00783086	0.080912	Coding
Sem1	4632.05	0.115421	0.0434178	2.65839	0.00785158	0.0810093	Coding
Slc25a31	4.48285	3.70585	1.39392	2.65858	0.00784718	0.0810093	Coding
Fam49a	35.7788	0.571627	0.215114	2.65732	0.00787639	0.0811117	Coding
Ubr1	197.301	-0.283423	0.106652	-2.65745	0.00787337	0.0811117	Coding
Gm11970	4.39926	1.65149	0.621538	2.65711	0.00788148	0.0811117	Predicted
Gm4866	12.1294	0.967907	0.364303	2.65687	0.00788696	0.0811117	Predicted
Oas1b	37.9839	0.524751	0.197509	2.65684	0.00788767	0.0811117	Coding
Tm6sf1	11.9406	1.64555	0.619981	2.6542	0.00794966	0.0816949	Coding
Ube2g2	410.987	-0.221532	0.0835108	-2.65274	0.00798415	0.0819344	Coding
Eln	1400.49	-1.04086	0.392365	-2.65278	0.00798309	0.0819344	Coding
Tmem115	246.016	-0.322547	0.121599	-2.65254	0.00798883	0.0819344	Coding
Il24	5.90122	1.41778	0.534723	2.65142	0.00801537	0.0821522	Coding
Tmem59	3556.77	-0.22421	0.0845897	-2.65055	0.00803604	0.0822307	Coding
AC132304.1	26.4415	0.602227	0.227185	2.65082	0.00802959	0.0822307	Noncoding
Gm13075	19.0804	1.28566	0.485076	2.65043	0.00803895	0.0822307	Predicted
Gm37728	79.1744	0.50396	0.19016	2.65019	0.00804459	0.0822342	Predicted
Ndufa5	1736.62	0.249814	0.0943023	2.64908	0.00807113	0.082451	Coding
Lpcat1	164.739	-0.305161	0.115221	-2.64847	0.0080856	0.0824998	Coding
Srek1ip1	263.803	0.25234	0.0952791	2.64843	0.00808654	0.0824998	Coding
AC165080.3	46.0282	-0.739406	0.27924	-2.64792	0.00809889	0.0825714	Noncoding
mt-Atp8	407.657	0.21241	0.0802302	2.64751	0.00810867	0.0826168	Mitochondrial
Ctps	786.967	0.313587	0.11846	2.6472	0.00811619	0.082639	Coding
Atp5j2	4457.93	0.151274	0.0571976	2.64476	0.00817485	0.0831817	Coding
Smtn	269.093	-0.386365	0.146136	-2.64387	0.00819635	0.0833457	Coding
Rpl8	20346.8	-0.107048	0.0405266	-2.64143	0.00825576	0.0838947	Ribosomal
Chst2	183.35	-0.502931	0.190445	-2.64082	0.0082705	0.0839895	Coding
CT030170.6	25.6806	-0.8818	0.334093	-2.63939	0.0083056	0.0842647	Noncoding
Sema4g	9.67032	-1.01066	0.382931	-2.63927	0.00830847	0.0842647	Coding
Meg3	7272.72	0.328993	0.124694	2.6384	0.00832972	0.0843697	Noncoding
Adamts5	4348.58	0.515282	0.195286	2.6386	0.00832489	0.0843697	Coding
Slc16a3	1046.61	-0.68799	0.26083	-2.6377	0.00834716	0.0844911	Coding
Crtap	1672.51	-0.177458	0.0672947	-2.63703	0.00836346	0.0846009	Coding
Rab34	894.421	-0.173575	0.065838	-2.6364	0.00837914	0.0847042	Coding
Add2	3.46507	-2.30428	0.874268	-2.63566	0.00839734	0.0848329	Coding
Myh9	1685.61	-0.309093	0.11731	-2.63484	0.00841777	0.0849838	Coding
Mir703	336.754	0.25219	0.0958508	2.63106	0.00851184	0.0858776	Noncoding
Gna13	754.966	0.326355	0.12409	2.62997	0.00853913	0.0860968	Coding
Ift172	59.8851	0.46475	0.176806	2.62859	0.00857395	0.0862796	Coding
Maged2	1605.52	-0.217728	0.0828269	-2.62872	0.00857073	0.0862796	Coding
Lpar4	141.47	0.342354	0.130226	2.62891	0.00856587	0.0862796	Coding
Tmem192	204.89	0.272044	0.103532	2.62764	0.00859791	0.0864085	Coding
Cpq	1048.13	0.392551	0.149386	2.62776	0.00859482	0.0864085	Coding
Hk2	1393.22	0.52236	0.198816	2.62735	0.00860518	0.0864254	Coding
Gm15675	105.24	0.762008	0.290115	2.62657	0.00862502	0.0865686	Predicted
Cep295	76.2075	0.383016	0.145865	2.62583	0.00864383	0.086653	Coding
Slc37a2	9.52555	-1.13787	0.433415	-2.62536	0.00865579	0.086653	Coding
Mcl1	2473.88	0.354733	0.135115	2.62541	0.00865439	0.086653	Coding
Ikbip	1573.14	-0.18334	0.0698322	-2.62544	0.00865371	0.086653	Coding
Neu2	10.3846	-2.29544	0.874537	-2.62475	0.00867132	0.0867524	Coding
Stk35	88.2419	0.340982	0.12996	2.62375	0.00869671	0.0869503	Coding
Sos1	144.223	-0.282585	0.107728	-2.62315	0.00871219	0.0870489	Coding
Rffl	52.5455	0.521253	0.198797	2.62204	0.00874046	0.0871509	Coding
Sh3bp1	140.5	-0.29568	0.112775	-2.62186	0.00874513	0.0871509	Coding
Mrps36	525.063	0.180056	0.0686803	2.62165	0.00875052	0.0871509	Coding
Ndufb2	1186.5	0.154018	0.0587461	2.62176	0.00874761	0.0871509	Coding
Uxs1	323.059	-0.236563	0.0902073	-2.62244	0.00873029	0.0871509	Coding
Gm6222	64.08	0.431162	0.164582	2.61974	0.0087998	0.0875854	Predicted
Nynrin	97.5243	-0.421129	0.160844	-2.61824	0.00883844	0.0879135	Coding
Sap18	1163.04	-0.208414	0.0796145	-2.61779	0.0088501	0.087973	Coding
Fam210a	179.682	-0.264408	0.101024	-2.61728	0.00886328	0.0879912	Coding
Gm37472	30.9789	0.584113	0.223171	2.61733	0.00886209	0.0879912	Predicted
Lemd3	91.4416	-0.344379	0.131629	-2.61628	0.00888946	0.0881946	Coding
Ccnd3	524.51	-0.191826	0.0733421	-2.61549	0.00890988	0.0882842	Coding
Angpt1	208.06	0.419581	0.160418	2.61554	0.00890869	0.0882842	Coding
Arcn1	948.884	-0.162905	0.0622956	-2.61502	0.0089221	0.0883487	Coding
Akap7	159.689	0.3839	0.146863	2.614	0.00894902	0.0885587	Coding
Gm3222	5.28716	-1.58118	0.605296	-2.61225	0.00899484	0.0889554	Predicted
Slc30a5	242.738	-0.264651	0.101402	-2.60992	0.00905629	0.0894317	Coding
2610002M06Rik	238.534	0.238249	0.0912882	2.60986	0.00905803	0.0894317	Coding
Camkk1	27.0756	-0.8212	0.314664	-2.60977	0.00906032	0.0894317	Coding
Rhob	2069.65	0.259196	0.0993735	2.6083	0.00909937	0.0897029	Coding
[truncated: 16,782 more rows]
