# Supplementary material for: Combined PD-L1/TGFβ blockade allows expansion and differentiation of stem cell-like CD8 T cells in immune excluded tumors
Source: Nat Commun. 2023 Aug 5;14:4703. doi: 10.1038/s41467-023-40398-4 (PMC10404279; doi:10.1038/s41467-023-40398-4)
Supplement: Supplementary file 9 — Supplementary Data 7 [file 41467_2023_40398_MOESM9_ESM.xlsx]

## Sheet: Myeloid_Combo_vs_Ctrl
Term	Overlap	P.value	Adjusted.P.value	Old.P.value	Old.Adjusted.P.value	Odds.Ratio	Combined.Score	NES	pathway	comparison	overlap_n
TNF-alpha Signaling via NF-kB	99/200	3.38673e-73	1.69337e-71	0	0	9.56522	1596.14	3.20307	MSigDB_Hallmark_2020	Combo_vs_Ctrl	99
Interferon Gamma Response	94/200	7.88075e-67	1.97019e-65	0	0	9.08213	1382.38	3.14063	MSigDB_Hallmark_2020	Combo_vs_Ctrl	94
Interferon Alpha Response	42/97	1.50327e-28	1.87909e-27	0	0	8.36695	536.027	2.72919	MSigDB_Hallmark_2020	Combo_vs_Ctrl	42
Type II interferon signaling (IFNG) WP1253	21/34	3.93437e-19	6.92448e-17	0	0	11.9352	505.807	2.70398	WikiPathways_2019_Mouse	Combo_vs_Ctrl	21
Inflammatory Response	62/200	1.24354e-31	2.07256e-30	0	0	5.99034	426.286	2.6297	MSigDB_Hallmark_2020	Combo_vs_Ctrl	62
IL-6/JAK/STAT3 Signaling	35/87	1.05218e-22	1.05218e-21	0	0	7.77389	393.406	2.59484	MSigDB_Hallmark_2020	Combo_vs_Ctrl	35
NO2-dependent IL 12 Pathway in NK cells Homo sapiens h no2il12Pathway	2020-08-09	4.30488e-10	1.02026e-07	0	0	17.1766	370.432	2.56871	BioCarta_2016	Combo_vs_Ctrl	8
Allograft Rejection	48/200	1.62507e-19	1.35422e-18	0	0	4.63768	200.643	2.30242	MSigDB_Hallmark_2020	Combo_vs_Ctrl	48
Apoptosis	41/161	7.40678e-18	5.29055e-17	0	0	4.92093	194.102	2.28803	MSigDB_Hallmark_2020	Combo_vs_Ctrl	41
Interferon alpha/beta signaling Homo sapiens R-HSA-909733	23/68	1.78195e-13	9.08797e-11	0	0	6.53595	191.869	2.283	Reactome_2016	Combo_vs_Ctrl	23
Immune System Homo sapiens R-HSA-168256	195/1547	8.3269e-33	1.27402e-29	0	0	2.43576	179.919	2.25508	Reactome_2016	Combo_vs_Ctrl	195
HINATA NFKB IMMU INF	2020-09-17	4.29051e-08	9.01008e-07	0	0	10.2302	173.548	2.23942	MSigDB_Oncogenic_Signatures	Combo_vs_Ctrl	9
Interleukin-6 family signaling Homo sapiens R-HSA-6783589	2020-12-27	2.9237e-09	4.97029e-07	0	0	8.5883	168.764	2.22728	Reactome_2016	Combo_vs_Ctrl	12
Cytokine Signaling in Immune system Homo sapiens R-HSA-1280215	99/620	4.4194e-24	3.38084e-21	0	0	3.08555	165.929	2.21992	Reactome_2016	Combo_vs_Ctrl	99
Interleukin-1 processing Homo sapiens R-HSA-448706	2020-05-07	7.07409e-06	0.000491971	0	0	13.8026	163.686	2.21401	Reactome_2016	Combo_vs_Ctrl	5
IL12 and Stat4 Dependent Signaling Pathway in Th1 Development Homo sapiens h IL12Pathway	2020-08-15	2.32686e-07	1.83822e-05	0	0	10.306	157.409	2.19703	BioCarta_2016	Combo_vs_Ctrl	8
Apoptosis WP1254	24/81	1.42634e-12	1.25518e-10	0	0	5.72553	156.169	2.1936	WikiPathways_2019_Mouse	Combo_vs_Ctrl	24
IL-2/STAT5 Signaling	44/199	1.4612e-16	9.13249e-16	0	0	4.27257	155.787	2.19253	MSigDB_Hallmark_2020	Combo_vs_Ctrl	44
Macrophage markers WP2271	2020-06-10	3.32204e-06	5.84679e-05	0	0	11.5942	146.26	2.16513	WikiPathways_2019_Mouse	Combo_vs_Ctrl	6
Erythropoietin mediated neuroprotection through NF-kB Homo sapiens h eponfkbPathway	2020-07-13	1.26981e-06	6.01892e-05	0	0	10.4051	141.266	2.15004	BioCarta_2016	Combo_vs_Ctrl	7
STK33 UP	55/293	5.66976e-17	1.07158e-14	0	0	3.62731	135.693	2.13256	MSigDB_Oncogenic_Signatures	Combo_vs_Ctrl	55
STK33 NOMO UP	55/294	6.63567e-17	6.27071e-15	0	0	3.61497	134.663	2.12925	MSigDB_Oncogenic_Signatures	Combo_vs_Ctrl	55
Complement	42/200	4.94943e-15	2.74968e-14	0	0	4.05797	133.668	2.12603	MSigDB_Hallmark_2020	Combo_vs_Ctrl	42
Interleukin-6 signaling Homo sapiens R-HSA-1059683	2020-06-11	6.98735e-06	0.000509078	0	0	10.5402	125.127	2.09735	Reactome_2016	Combo_vs_Ctrl	6
STK33 SKM UP	53/290	6.8985e-16	4.34605e-14	0	0	3.53157	123.287	2.09092	MSigDB_Oncogenic_Signatures	Combo_vs_Ctrl	53
Interferon Signaling Homo sapiens R-HSA-913531	39/196	2.92924e-13	1.12043e-10	0	0	3.84502	110.963	2.04518	Reactome_2016	Combo_vs_Ctrl	39
CD40L Signaling Pathway Homo sapiens h cd40Pathway	2020-05-09	3.88902e-05	0.00115212	0	0	10.7354	109.015	2.03749	BioCarta_2016	Combo_vs_Ctrl	5
TNFR2 Signaling Pathway Homo sapiens h tnfr2Pathway	2020-06-12	1.33612e-05	0.000452372	0	0	9.66184	108.436	2.03517	BioCarta_2016	Combo_vs_Ctrl	6
Hypoxia	39/200	5.75456e-13	2.87728e-12	0	0	3.76812	106.199	2.02612	MSigDB_Hallmark_2020	Combo_vs_Ctrl	39
Interferon gamma signaling Homo sapiens R-HSA-877300	23/93	2.40153e-10	4.59293e-08	0	0	4.77897	105.853	2.0247	Reactome_2016	Combo_vs_Ctrl	23
EGFR UP.V1 UP	38/193	8.34051e-13	3.94089e-11	0	0	3.80466	105.817	2.02456	MSigDB_Oncogenic_Signatures	Combo_vs_Ctrl	38
HOXA9 DN.V1 UP	38/194	9.86693e-13	3.7297e-11	0	0	3.78505	104.635	2.01968	MSigDB_Oncogenic_Signatures	Combo_vs_Ctrl	38
RPS14 DN.V1 UP	37/192	3.28276e-12	1.03407e-10	0	0	3.72383	98.4668	1.99329	MSigDB_Oncogenic_Signatures	Combo_vs_Ctrl	37
IL-6-type cytokine receptor ligand interactions Homo sapiens R-HSA-6788467	2020-08-20	3.61035e-06	0.000290728	0	0	7.72947	96.8634	1.98616	Reactome_2016	Combo_vs_Ctrl	8
Oxidative Damage WP1496	13/42	1.11115e-07	3.91124e-06	0	0	5.98114	95.7741	1.98125	WikiPathways_2019_Mouse	Combo_vs_Ctrl	13
Keratinocyte Differentiation Homo sapiens h keratinocytePathway	15/53	4.52749e-08	5.36507e-06	0	0	5.46896	92.483	1.96606	BioCarta_2016	Combo_vs_Ctrl	15
Adipogenesis genes WP447	28/134	1.98936e-10	1.16709e-08	0	0	4.03778	90.1961	1.95519	WikiPathways_2019_Mouse	Combo_vs_Ctrl	28
KRAS Signaling Up	37/200	1.16869e-11	5.31223e-11	0	0	3.57488	89.9888	1.95419	MSigDB_Hallmark_2020	Combo_vs_Ctrl	37
Apoptosis signaling pathway Homo sapiens P00006	23/102	1.71102e-09	1.91634e-07	0	0	4.3573	87.9572	1.94427	Panther_2016	Combo_vs_Ctrl	23
Regulation of IFNG signaling Homo sapiens R-HSA-877312	2020-06-14	3.97001e-05	0.00168725	0	0	8.28157	83.9268	1.9239	Reactome_2016	Combo_vs_Ctrl	6
JAK/STAT signaling pathway Homo sapiens P00038	2020-06-14	3.97001e-05	0.000889282	0	0	8.28157	83.9268	1.9239	Panther_2016	Combo_vs_Ctrl	6
Signal transduction through IL1R Homo sapiens h il1rPathway	1936-11-01	1.22904e-06	7.28207e-05	0	0	5.90446	80.3554	1.90501	BioCarta_2016	Combo_vs_Ctrl	11
IL22 Soluble Receptor Signaling Pathway Homo sapiens h il22bppathway	2020-05-11	0.000130685	0.00344138	0	0	8.78349	78.5482	1.89514	BioCarta_2016	Combo_vs_Ctrl	5
IL-1 Signaling Pathway WP37	1937-11-01	1.66757e-06	4.89153e-05	0	0	5.74488	76.4307	1.88327	WikiPathways_2019_Mouse	Combo_vs_Ctrl	11
RAF-independent MAPK1/3 activation Homo sapiens R-HSA-112409	2020-08-23	1.22276e-05	0.000719546	0	0	6.72128	76.0299	1.88098	Reactome_2016	Combo_vs_Ctrl	8
Toll receptor signaling pathway Homo sapiens P00054	13/49	8.15585e-07	3.04485e-05	0	0	5.12669	71.8729	1.85657	Panther_2016	Combo_vs_Ctrl	13
p53 Pathway	34/200	8.32105e-10	3.4671e-09	0	0	3.28502	68.6802	1.83683	MSigDB_Hallmark_2020	Combo_vs_Ctrl	34
transcriptional repressor activity, RNA polymerase II activating transcription factor binding (GO:0098811)	2020-05-12	0.000214489	0.0205731	0	0	8.05153	68.0133	1.83259	GO_Molecular_Function_2018	Combo_vs_Ctrl	5
Signaling by Interleukins Homo sapiens R-HSA-449147	55/392	1.5404e-11	3.92803e-09	0	0	2.71123	67.4998	1.8293	Reactome_2016	Combo_vs_Ctrl	55
Nucleotide-like (purinergic) receptors Homo sapiens R-HSA-418038	2020-06-16	9.68056e-05	0.00379776	0	0	7.24638	66.9769	1.82592	Reactome_2016	Combo_vs_Ctrl	6
Nucleotide-binding domain, leucine rich repeat containing receptor (NLR) signaling pathways Homo sapiens R-HSA-168643	1947-12-01	3.36088e-06	0.000285675	0	0	4.9337	62.181	1.79366	Reactome_2016	Combo_vs_Ctrl	12
Innate Immune System Homo sapiens R-HSA-168249	92/807	6.60157e-13	2.02008e-10	0	0	2.20295	61.7845	1.79088	Reactome_2016	Combo_vs_Ctrl	92
E2F1 UP.V1 DN	32/193	4.9155e-09	1.32719e-07	0	0	3.20392	61.2939	1.78742	MSigDB_Oncogenic_Signatures	Combo_vs_Ctrl	32
TAK1 activates NFkB by phosphorylation and activation of IKKs complex Homo sapiens R-HSA-445989	2020-08-26	3.39095e-05	0.00148233	0	0	5.94575	61.1925	1.7867	Reactome_2016	Combo_vs_Ctrl	8
NOD1/2 Signaling Pathway Homo sapiens R-HSA-168638	1931-09-01	1.84385e-05	0.000910027	0	0	5.6101	61.1561	1.78644	Reactome_2016	Combo_vs_Ctrl	9
Regulation of TNFR1 signaling Homo sapiens R-HSA-5357905	1931-09-01	1.84385e-05	0.000881589	0	0	5.6101	61.1561	1.78644	Reactome_2016	Combo_vs_Ctrl	9
RIG-I/MDA5 mediated induction of IFN-alpha/beta pathways Homo sapiens R-HSA-168928	17/79	4.59434e-07	5.40718e-05	0	0	4.15826	60.6826	1.78306	Reactome_2016	Combo_vs_Ctrl	17
Apoptosis Modulation by HSP70 WP166	2020-06-17	0.000143073	0.00179863	0	0	6.82012	60.3728	1.78084	WikiPathways_2019_Mouse	Combo_vs_Ctrl	6
Complement Activation, Classical Pathway WP200	2020-06-17	0.000143073	0.00167872	0	0	6.82012	60.3728	1.78084	WikiPathways_2019_Mouse	Combo_vs_Ctrl	6
Common Pathway of Fibrin Clot Formation Homo sapiens R-HSA-140875	2020-07-22	8.36563e-05	0.00336827	0	0	6.14844	57.7264	1.76137	Reactome_2016	Combo_vs_Ctrl	7
Complement and Coagulation Cascades WP449	14/62	2.56063e-06	5.63338e-05	0	0	4.36341	56.18	1.74958	WikiPathways_2019_Mouse	Combo_vs_Ctrl	14
Interleukin-1 signaling Homo sapiens R-HSA-446652	1944-11-01	1.0718e-05	0.000683276	0	0	4.83092	55.283	1.74259	Reactome_2016	Combo_vs_Ctrl	11
Activated TLR4 signalling Homo sapiens R-HSA-166054	21/112	2.5591e-07	3.55948e-05	0	0	3.62319	54.9943	1.74032	Reactome_2016	Combo_vs_Ctrl	21
Oxidative Stress Induced Gene Expression Via Nrf2 Homo sapiens h arenrf2Pathway	2020-06-18	0.000205242	0.00486424	0	0	6.44122	54.6945	1.73794	BioCarta_2016	Combo_vs_Ctrl	6
Formation of Fibrin Clot (Clotting Cascade) Homo sapiens R-HSA-140877	1939-10-01	2.121e-05	0.000983372	0	0	4.95479	53.3187	1.72688	Reactome_2016	Combo_vs_Ctrl	10
LTE2 UP.V1 DN	31/196	2.66788e-08	6.30286e-07	0	0	3.05629	53.2999	1.72673	MSigDB_Oncogenic_Signatures	Combo_vs_Ctrl	31
Inflammation mediated by chemokine and cytokine signaling pathway Homo sapiens P00031	30/188	3.6291e-08	2.03229e-06	0	0	3.08356	52.8267	1.72285	Panther_2016	Combo_vs_Ctrl	30
Toll Like Receptor 4 (TLR4) Cascade Homo sapiens R-HSA-166016	22/122	2.72242e-07	3.47109e-05	0	0	3.4846	52.6752	1.72161	Reactome_2016	Combo_vs_Ctrl	22
CARD domain binding (GO:0050700)	2020-05-14	0.000497061	0.0357573	0	0	6.90131	52.4969	1.72013	GO_Molecular_Function_2018	Combo_vs_Ctrl	5
cysteine-type endopeptidase activity involved in execution phase of apoptosis (GO:0097200)	2020-05-14	0.000497061	0.033654	0	0	6.90131	52.4969	1.72013	GO_Molecular_Function_2018	Combo_vs_Ctrl	5
Chemokine signaling pathway WP2292	30/190	4.63755e-08	2.04052e-06	0	0	3.05111	51.5225	1.712	WikiPathways_2019_Mouse	Combo_vs_Ctrl	30
Adaptive Immune System Homo sapiens R-HSA-1280218	84/762	4.03988e-11	8.83003e-09	0	0	2.13017	50.9797	1.7074	Reactome_2016	Combo_vs_Ctrl	84
Interleukin signaling pathway Homo sapiens P00036	17/86	1.6254e-06	4.55111e-05	0	0	3.8198	50.917	1.70686	Panther_2016	Combo_vs_Ctrl	17
Toll-Like Receptors Cascades Homo sapiens R-HSA-168898	24/140	2.12237e-07	3.24722e-05	0	0	3.31263	50.9004	1.70672	Reactome_2016	Combo_vs_Ctrl	24
RELA DN.V1 UP	25/149	1.83049e-07	3.45962e-06	0	0	3.24223	50.2983	1.70155	MSigDB_Oncogenic_Signatures	Combo_vs_Ctrl	25
UV Response Up	26/158	1.55928e-07	5.99724e-07	0	0	3.17984	49.8405	1.69758	MSigDB_Hallmark_2020	Combo_vs_Ctrl	26
death receptor activity (GO:0005035)	2020-07-24	0.000155011	0.0223022	0	0	5.63607	49.4397	1.69408	GO_Molecular_Function_2018	Combo_vs_Ctrl	7
tumor necrosis factor-activated receptor activity (GO:0005031)	2020-07-24	0.000155011	0.0198242	0	0	5.63607	49.4397	1.69408	GO_Molecular_Function_2018	Combo_vs_Ctrl	7
Growth hormone receptor signaling Homo sapiens R-HSA-982772	2020-07-24	0.000155011	0.00539015	0	0	5.63607	49.4397	1.69408	Reactome_2016	Combo_vs_Ctrl	7
cytokine receptor activity (GO:0004896)	15/73	3.98519e-06	0.00152898	0	0	3.97062	49.3664	1.69343	GO_Molecular_Function_2018	Combo_vs_Ctrl	15
HIV-1 Nef: negative effector of Fas and TNF Homo sapiens h HivnefPathway	1953-12-01	1.28765e-05	0.000508621	0	0	4.37517	49.2649	1.69254	BioCarta_2016	Combo_vs_Ctrl	12
MyD88-independent TLR3/TLR4 cascade Homo sapiens R-HSA-166166	18/97	2.1204e-06	0.00021628	0	0	3.58584	46.845	1.67066	Reactome_2016	Combo_vs_Ctrl	18
Toll Like Receptor 3 (TLR3) Cascade Homo sapiens R-HSA-168164	18/97	2.1204e-06	0.000202763	0	0	3.58584	46.845	1.67066	Reactome_2016	Combo_vs_Ctrl	18
TRIF-mediated TLR3/TLR4 signaling Homo sapiens R-HSA-937061	18/97	2.1204e-06	0.000190836	0	0	3.58584	46.845	1.67066	Reactome_2016	Combo_vs_Ctrl	18
Spinal Cord Injury WP2432	18/99	2.87883e-06	5.62972e-05	0	0	3.51339	44.8243	1.65151	WikiPathways_2019_Mouse	Combo_vs_Ctrl	18
Chemokine receptors bind chemokines Homo sapiens R-HSA-380108	1956-12-01	2.33512e-05	0.0010508	0	0	4.14079	44.1609	1.64504	Reactome_2016	Combo_vs_Ctrl	12
Novel Jun-Dmp1 Pathway WP3654	2020-07-26	0.000269035	0.0027853	0	0	5.20253	42.7683	1.63112	WikiPathways_2019_Mouse	Combo_vs_Ctrl	7
Cadmium induces DNA synthesis and proliferation in macrophages Homo sapiens h cdMacPathway	2020-05-16	0.000994483	0.0157128	0	0	6.03865	41.7469	1.62062	BioCarta_2016	Combo_vs_Ctrl	5
p75NTR signals via NF-kB Homo sapiens R-HSA-193639	2020-05-16	0.000994483	0.0220516	0	0	6.03865	41.7469	1.62062	Reactome_2016	Combo_vs_Ctrl	5
Hypoxia and p53 in the Cardiovascular system Homo sapiens h p53hypoxiaPathway	2020-06-21	0.000524913	0.010367	0	0	5.52105	41.6965	1.6201	BioCarta_2016	Combo_vs_Ctrl	6
RIP-mediated NFkB activation via ZBP1 Homo sapiens R-HSA-1810476	2020-06-21	0.000524913	0.0131659	0	0	5.52105	41.6965	1.6201	Reactome_2016	Combo_vs_Ctrl	6
BMI1 DN MEL18 DN.V1 UP	23/145	1.54791e-06	2.65959e-05	0	0	3.06513	41.0072	1.61286	MSigDB_Oncogenic_Signatures	Combo_vs_Ctrl	23
MAPK signaling pathway WP493	24/159	2.2905e-06	5.75898e-05	0	0	2.91678	37.8795	1.5784	WikiPathways_2019_Mouse	Combo_vs_Ctrl	24
TNF receptor superfamily (TNFSF) members mediating non-canonical NF-kB pathway Homo sapiens R-HSA-5676594	2020-05-17	0.00134924	0.0264658	0	0	5.68343	37.5573	1.57469	Reactome_2016	Combo_vs_Ctrl	5
MyD88:Mal cascade initiated on plasma membrane Homo sapiens R-HSA-166058	16/92	1.81778e-05	0.00103008	0	0	3.36064	36.6824	1.56446	Reactome_2016	Combo_vs_Ctrl	16
Toll Like Receptor TLR1:TLR2 Cascade Homo sapiens R-HSA-168179	16/92	1.81778e-05	0.000993287	0	0	3.36064	36.6824	1.56446	Reactome_2016	Combo_vs_Ctrl	16
Toll Like Receptor TLR6:TLR2 Cascade Homo sapiens R-HSA-168188	16/92	1.81778e-05	0.000959036	0	0	3.36064	36.6824	1.56446	Reactome_2016	Combo_vs_Ctrl	16
Toll Like Receptor 2 (TLR2) Cascade Homo sapiens R-HSA-181438	16/92	1.81778e-05	0.000927068	0	0	3.36064	36.6824	1.56446	Reactome_2016	Combo_vs_Ctrl	16
Xenobiotic Metabolism	28/200	1.5921e-06	5.68608e-06	0	0	2.70531	36.1172	1.55771	MSigDB_Hallmark_2020	Combo_vs_Ctrl	28
TNF signaling Homo sapiens R-HSA-75893	1941-09-01	0.000200957	0.00640551	0	0	4.24178	36.1078	1.5576	Reactome_2016	Combo_vs_Ctrl	9
Death Receptor Signalling Homo sapiens R-HSA-73887	1948-10-01	0.000142858	0.00508308	0	0	4.02576	35.6428	1.55197	Reactome_2016	Combo_vs_Ctrl	10
Caspase Cascade in Apoptosis Homo sapiens h caspasePathway	2020-06-23	0.000893496	0.0151256	0	0	5.04096	35.3894	1.54887	BioCarta_2016	Combo_vs_Ctrl	6
IL15 UP.V1 UP	27/192	2.22978e-06	3.5119e-05	0	0	2.71739	35.3631	1.54855	MSigDB_Oncogenic_Signatures	Combo_vs_Ctrl	27
IL2 UP.V1 UP	27/192	2.22978e-06	3.24176e-05	0	0	2.71739	35.3631	1.54855	MSigDB_Oncogenic_Signatures	Combo_vs_Ctrl	27
Toll-Like Receptor Pathway Homo sapiens h tollPathway	1935-08-01	0.000337374	0.00726889	0	0	4.41684	35.3096	1.54789	BioCarta_2016	Combo_vs_Ctrl	8
BMAL1:CLOCK,NPAS2 activates circadian gene expression Homo sapiens R-HSA-1368108	1942-09-01	0.000244141	0.00747071	0	0	4.14079	34.4421	1.53709	Reactome_2016	Combo_vs_Ctrl	9
chemokine receptor binding (GO:0042379)	1949-10-01	0.000171255	0.0179195	0	0	3.94361	34.2004	1.53403	GO_Molecular_Function_2018	Combo_vs_Ctrl	10
Chaperones modulate interferon Signaling Pathway Homo sapiens h tidPathway	2020-05-18	0.00178924	0.0249441	0	0	5.36769	33.9558	1.53091	BioCarta_2016	Combo_vs_Ctrl	5
ATM Signaling Pathway Homo sapiens h atmPathway	2020-05-18	0.00178924	0.0235583	0	0	5.36769	33.9558	1.53091	BioCarta_2016	Combo_vs_Ctrl	5
EDA Signalling in Hair Follicle Development WP3652	2020-05-18	0.00178924	0.0108588	0	0	5.36769	33.9558	1.53091	WikiPathways_2019_Mouse	Combo_vs_Ctrl	5
Leptin Insulin Overlap WP578	2020-05-18	0.00178924	0.0104969	0	0	5.36769	33.9558	1.53091	WikiPathways_2019_Mouse	Combo_vs_Ctrl	5
Activation of IRF3/IRF7 mediated by TBK1/IKK epsilon Homo sapiens R-HSA-936964	2020-05-18	0.00178924	0.0311084	0	0	5.36769	33.9558	1.53091	Reactome_2016	Combo_vs_Ctrl	5
Immunoregulatory interactions between a Lymphoid and a non-Lymphoid cell Homo sapiens R-HSA-198933	23/157	6.18574e-06	0.000473209	0	0	2.83086	33.9512	1.53086	Reactome_2016	Combo_vs_Ctrl	23
PDGF ERK DN.V1 DN	22/149	8.59987e-06	0.000108358	0	0	2.85316	33.2786	1.52216	MSigDB_Oncogenic_Signatures	Combo_vs_Ctrl	22
Inflammatory Response Pathway WP458	2020-07-30	0.000694655	0.00582187	0	0	4.50886	32.7888	1.51573	WikiPathways_2019_Mouse	Combo_vs_Ctrl	7
IL-9 Signaling Pathway WP10	2020-06-24	0.00113966	0.0083575	0	0	4.83092	32.7393	1.51507	WikiPathways_2019_Mouse	Combo_vs_Ctrl	6
Diseases associated with the TLR signaling cascade Homo sapiens R-HSA-5602358	2020-06-24	0.00113966	0.023886	0	0	4.83092	32.7393	1.51507	Reactome_2016	Combo_vs_Ctrl	6
Diseases of Immune System Homo sapiens R-HSA-5260271	2020-06-24	0.00113966	0.0235632	0	0	4.83092	32.7393	1.51507	Reactome_2016	Combo_vs_Ctrl	6
TRAF6 mediated NF-kB activation Homo sapiens R-HSA-933542	2020-06-24	0.00113966	0.0232491	0	0	4.83092	32.7393	1.51507	Reactome_2016	Combo_vs_Ctrl	6
TYROBP Causal Network WP3625	1958-11-01	0.00016383	0.00180213	0	0	3.66483	31.9452	1.50441	WikiPathways_2019_Mouse	Combo_vs_Ctrl	11
LEF1 UP.V1 DN	26/190	5.68112e-06	7.66951e-05	0	0	2.64429	31.9387	1.50432	MSigDB_Oncogenic_Signatures	Combo_vs_Ctrl	26
IL-6 signaling Pathway WP387	16/99	4.64148e-05	0.00068075	0	0	3.12302	31.1611	1.49361	WikiPathways_2019_Mouse	Combo_vs_Ctrl	16
Regulation of IFNA signaling Homo sapiens R-HSA-912694	2020-06-25	0.00143459	0.0274364	0	0	4.63768	30.3623	1.48234	Reactome_2016	Combo_vs_Ctrl	6
TGF Beta Signaling Pathway WP113	1952-10-01	0.000286405	0.00265302	0	0	3.71609	30.3163	1.48168	WikiPathways_2019_Mouse	Combo_vs_Ctrl	10
Blood coagulation Homo sapiens P00011	1938-08-01	0.000610821	0.0085515	0	0	4.06814	30.1071	1.47867	Panther_2016	Combo_vs_Ctrl	8
RNA polymerase II regulatory region sequence-specific DNA binding (GO:0000977)	50/460	6.00664e-07	0.000691364	0	0	2.1004	30.0887	1.4784	GO_Molecular_Function_2018	Combo_vs_Ctrl	50
IL-2 Signaling Pathway WP450	13/76	0.000129692	0.00175583	0	0	3.30536	29.5842	1.47106	WikiPathways_2019_Mouse	Combo_vs_Ctrl	13
MyD88 dependent cascade initiated on endosome Homo sapiens R-HSA-975155	14/85	0.000110411	0.00412023	0	0	3.18272	28.9987	1.46238	Reactome_2016	Combo_vs_Ctrl	14
Toll Like Receptor 7/8 (TLR7/8) Cascade Homo sapiens R-HSA-168181	14/85	0.000110411	0.00402213	0	0	3.18272	28.9987	1.46238	Reactome_2016	Combo_vs_Ctrl	14
White fat cell differentiation WP2872	1932-07-01	0.00104928	0.00802931	0	0	4.22705	28.9961	1.46234	WikiPathways_2019_Mouse	Combo_vs_Ctrl	7
chemokine activity (GO:0008009)	1946-09-01	0.000500967	0.0320341	0	0	3.78072	28.7296	1.45833	GO_Molecular_Function_2018	Combo_vs_Ctrl	9
EPO Receptor Signaling WP1249	2020-06-26	0.00178425	0.0112153	0	0	4.45931	28.2219	1.45059	WikiPathways_2019_Mouse	Combo_vs_Ctrl	6
Attenuation phase Homo sapiens R-HSA-3371568	2020-06-26	0.00178425	0.0321165	0	0	4.45931	28.2219	1.45059	Reactome_2016	Combo_vs_Ctrl	6
ZBP1(DAI) mediated induction of type I IFNs Homo sapiens R-HSA-1606322	2020-06-26	0.00178425	0.0317431	0	0	4.45931	28.2219	1.45059	Reactome_2016	Combo_vs_Ctrl	6
TNFR1-induced NFkappaB signaling pathway Homo sapiens R-HSA-5357956	2020-06-26	0.00178425	0.0313782	0	0	4.45931	28.2219	1.45059	Reactome_2016	Combo_vs_Ctrl	6
Blood Clotting Cascade WP460	2020-05-20	0.0029704	0.0149369	0	0	4.83092	28.1114	1.44888	WikiPathways_2019_Mouse	Combo_vs_Ctrl	5
Hypertrophy Model WP202	2020-05-20	0.0029704	0.0145219	0	0	4.83092	28.1114	1.44888	WikiPathways_2019_Mouse	Combo_vs_Ctrl	5
CSR LATE UP.V1 DN	23/170	2.32818e-05	0.000275016	0	0	2.61438	27.8898	1.44545	MSigDB_Oncogenic_Signatures	Combo_vs_Ctrl	23
Signaling by the B Cell Receptor (BCR) Homo sapiens R-HSA-983705	29/233	1.11217e-05	0.000680648	0	0	2.40509	27.434	1.43829	Reactome_2016	Combo_vs_Ctrl	29
Toll Like Receptor signaling WP88	1933-07-01	0.00127304	0.0089622	0	0	4.09896	27.3251	1.43656	WikiPathways_2019_Mouse	Combo_vs_Ctrl	7
Circadian Clock Homo sapiens R-HSA-400253	1963-11-01	0.000349888	0.00955944	0	0	3.37397	26.8497	1.42894	Reactome_2016	Combo_vs_Ctrl	11
Toll Like Receptor 9 (TLR9) Cascade Homo sapiens R-HSA-168138	14/88	0.00016183	0.00538262	0	0	3.07422	26.8348	1.4287	Reactome_2016	Combo_vs_Ctrl	14
Hemostasis Homo sapiens R-HSA-109582	56/552	1.19317e-06	0.000130397	0	0	1.96037	26.7373	1.42712	Reactome_2016	Combo_vs_Ctrl	56
Myometrial Relaxation and Contraction Pathways WP385	21/153	4.19021e-05	0.000670433	0	0	2.65227	26.7353	1.42709	WikiPathways_2019_Mouse	Combo_vs_Ctrl	21
Cytokines and Inflammatory Response WP222	2020-06-27	0.00219487	0.0120718	0	0	4.29415	26.2872	1.41974	WikiPathways_2019_Mouse	Combo_vs_Ctrl	6
TRAF6 Mediated Induction of proinflammatory cytokines Homo sapiens R-HSA-168180	1972-12-01	0.000299883	0.00849669	0	0	3.22061	26.126	1.41707	Reactome_2016	Combo_vs_Ctrl	12
cytokine activity (GO:0005125)	21/155	5.0882e-05	0.00976087	0	0	2.61805	25.882	1.413	GO_Molecular_Function_2018	Combo_vs_Ctrl	21
CCKR signaling map ST Homo sapiens P06959	22/165	4.36028e-05	0.000813918	0	0	2.57649	25.869	1.41278	Panther_2016	Combo_vs_Ctrl	22
Signaling of Hepatocyte Growth Factor Receptor WP193	1934-07-01	0.00153244	0.0103734	0	0	3.9784	25.7836	1.41134	WikiPathways_2019_Mouse	Combo_vs_Ctrl	7
Negative regulators of RIG-I/MDA5 signaling Homo sapiens R-HSA-936440	1934-07-01	0.00153244	0.0285931	0	0	3.9784	25.7836	1.41134	Reactome_2016	Combo_vs_Ctrl	7
RAF UP.V1 UP	25/196	2.90304e-05	0.000322749	0	0	2.46475	25.7497	1.41077	MSigDB_Oncogenic_Signatures	Combo_vs_Ctrl	25
NF-kB Signaling Pathway Homo sapiens h nfkbPathway	2020-05-21	0.00373461	0.0354041	0	0	4.60087	25.7194	1.41026	BioCarta_2016	Combo_vs_Ctrl	5
CLEC7A (Dectin-1) signaling Homo sapiens R-HSA-5607764	15/99	0.000167915	0.00546617	0	0	2.92783	25.4488	1.40567	Reactome_2016	Combo_vs_Ctrl	15
T cell activation Homo sapiens P00053	1973-12-01	0.00034224	0.00547585	0	0	3.17649	25.3484	1.40395	Panther_2016	Combo_vs_Ctrl	12
protein homodimerization activity (GO:0042803)	64/664	1.23429e-06	0.000710333	0	0	1.86252	25.3396	1.4038	GO_Molecular_Function_2018	Combo_vs_Ctrl	64
Toll Like Receptor 10 (TLR10) Cascade Homo sapiens R-HSA-168142	13/82	0.000284421	0.00853264	0	0	3.06351	25.0137	1.39818	Reactome_2016	Combo_vs_Ctrl	13
Toll Like Receptor 5 (TLR5) Cascade Homo sapiens R-HSA-168176	13/82	0.000284421	0.00836855	0	0	3.06351	25.0137	1.39818	Reactome_2016	Combo_vs_Ctrl	13
MyD88 cascade initiated on plasma membrane Homo sapiens R-HSA-975871	13/82	0.000284421	0.00821065	0	0	3.06351	25.0137	1.39818	Reactome_2016	Combo_vs_Ctrl	13
MEL18 DN.V1 DN	20/148	7.89838e-05	0.00078568	0	0	2.61131	24.6671	1.39212	MSigDB_Oncogenic_Signatures	Combo_vs_Ctrl	20
Beta2 adrenergic receptor signaling pathway Homo sapiens P04378	2020-06-28	0.00267285	0.0332621	0	0	4.14079	24.5325	1.38974	Panther_2016	Combo_vs_Ctrl	6
TRAF6 mediated induction of NFkB and MAP kinases upon TLR7/8 or 9 activation Homo sapiens R-HSA-975138	13/83	0.00032153	0.00894437	0	0	3.0266	24.3412	1.38634	Reactome_2016	Combo_vs_Ctrl	13
Activation of NF-kappaB in B cells Homo sapiens R-HSA-1169091	1966-11-01	0.000529806	0.0130743	0	0	3.22061	24.2931	1.38548	Reactome_2016	Combo_vs_Ctrl	11
Fc epsilon receptor (FCERI) signaling Homo sapiens R-HSA-2454202	42/395	8.17981e-06	0.000544136	0	0	2.05467	24.0681	1.38144	Reactome_2016	Combo_vs_Ctrl	42
core promoter proximal region sequence-specific DNA binding (GO:0000987)	32/278	2.0118e-05	0.00578897	0	0	2.22431	24.0534	1.38118	GO_Molecular_Function_2018	Combo_vs_Ctrl	32
Inhibition of Cellular Proliferation by Gleevec Homo sapiens h gleevecpathway	2020-05-22	0.00462998	0.0406409	0	0	4.39174	23.6065	1.37303	BioCarta_2016	Combo_vs_Ctrl	5
P53 DN.V1 DN	24/192	5.77623e-05	0.000606504	0	0	2.41546	23.5729	1.37241	MSigDB_Oncogenic_Signatures	Combo_vs_Ctrl	24
C-type lectin receptors (CLRs) Homo sapiens R-HSA-5621481	17/123	0.000201123	0.00627996	0	0	2.67075	22.7324	1.35664	Reactome_2016	Combo_vs_Ctrl	17
TNFR2 non-canonical NF-kB pathway Homo sapiens R-HSA-5668541	14/95	0.00036765	0.00986849	0	0	2.8477	22.5207	1.35258	Reactome_2016	Combo_vs_Ctrl	14
IL-7 Signaling Pathway WP297	1944-08-01	0.00168228	0.010966	0	0	3.51339	22.4422	1.35106	WikiPathways_2019_Mouse	Combo_vs_Ctrl	8
RNA polymerase II core promoter proximal region sequence-specific DNA binding (GO:0000978)	30/262	3.9888e-05	0.00918222	0	0	2.21263	22.4127	1.35049	GO_Molecular_Function_2018	Combo_vs_Ctrl	30
VEGF A UP.V1 UP	24/196	8.03478e-05	0.000759287	0	0	2.36616	22.3109	1.34852	MSigDB_Oncogenic_Signatures	Combo_vs_Ctrl	24
Mechanism of Gene Regulation by Peroxisome Proliferators via PPARa Homo sapiens h pparaPathway	1952-09-01	0.00126721	0.0187705	0	0	3.34448	22.3108	1.34852	BioCarta_2016	Combo_vs_Ctrl	9
IL-5 Signaling Pathway WP151	1969-11-01	0.00078114	0.00624912	0	0	3.08059	22.0408	1.34323	WikiPathways_2019_Mouse	Combo_vs_Ctrl	11
KRAS.LUNG.BREAST UP.V1 UP	19/145	0.000178193	0.00160374	0	0	2.53207	21.8584	1.33962	MSigDB_Oncogenic_Signatures	Combo_vs_Ctrl	19
PDGF UP.V1 UP	19/146	0.000195116	0.00160334	0	0	2.51472	21.4806	1.33205	MSigDB_Oncogenic_Signatures	Combo_vs_Ctrl	19
KRAS.BREAST UP.V1 UP	19/146	0.000195116	0.00153654	0	0	2.51472	21.4806	1.33205	MSigDB_Oncogenic_Signatures	Combo_vs_Ctrl	19
Coagulation	18/138	0.000276463	0.000921544	0	0	2.52048	20.6514	1.31495	MSigDB_Hallmark_2020	Combo_vs_Ctrl	18
G alpha (z) signalling events Homo sapiens R-HSA-418597	1946-08-01	0.00226082	0.0380116	0	0	3.36064	20.4731	1.31118	Reactome_2016	Combo_vs_Ctrl	8
WNT UP.V1 DN	21/170	0.000193623	0.00166339	0	0	2.38704	20.4083	1.30981	MSigDB_Oncogenic_Signatures	Combo_vs_Ctrl	21
Downstream signaling events of B Cell Receptor (BCR) Homo sapiens R-HSA-1168372	23/192	0.000156328	0.00531515	0	0	2.31481	20.286	1.3072	Reactome_2016	Combo_vs_Ctrl	23
Oxytocin receptor mediated signaling pathway Homo sapiens P04391	1939-07-01	0.0034996	0.0391955	0	0	3.46835	19.6139	1.29256	Panther_2016	Combo_vs_Ctrl	7
Cell surface interactions at the vascular wall Homo sapiens R-HSA-202733	14/101	0.000692436	0.0162989	0	0	2.67853	19.4871	1.28975	Reactome_2016	Combo_vs_Ctrl	14
protein heterodimerization activity (GO:0046982)	29/265	0.000119765	0.0196927	0	0	2.11467	19.0954	1.28093	GO_Molecular_Function_2018	Combo_vs_Ctrl	29
TNF-alpha NF-kB Signaling Pathway WP246	22/187	0.000278669	0.00272477	0	0	2.27337	18.6087	1.26972	WikiPathways_2019_Mouse	Combo_vs_Ctrl	22
Integrin cell surface interactions Homo sapiens R-HSA-216083	1967-10-01	0.00222907	0.0378941	0	0	2.88413	17.611	1.24578	Reactome_2016	Combo_vs_Ctrl	10
ubiquitin-like protein ligase binding (GO:0044389)	31/297	0.000169038	0.0194563	0	0	2.01695	17.518	1.24348	GO_Molecular_Function_2018	Combo_vs_Ctrl	31
GCNP SHH UP EARLY.V1 DN	20/169	0.000479404	0.00335583	0	0	2.28683	17.4781	1.24249	MSigDB_Oncogenic_Signatures	Combo_vs_Ctrl	20
Signalling by NGF Homo sapiens R-HSA-166520	43/450	8.31293e-05	0.00343751	0	0	1.84648	17.3479	1.23925	Reactome_2016	Combo_vs_Ctrl	43
TGFB UP.V1 UP	22/192	0.000403765	0.00305246	0	0	2.21417	17.303	1.23812	MSigDB_Oncogenic_Signatures	Combo_vs_Ctrl	22
Insulin Signaling WP65	19/159	0.000581983	0.00512145	0	0	2.30912	17.2008	1.23555	WikiPathways_2019_Mouse	Combo_vs_Ctrl	19
Selenium metabolism/Selenoproteins WP108	1950-08-01	0.00387763	0.018445	0	0	3.09179	17.1672	1.2347	WikiPathways_2019_Mouse	Combo_vs_Ctrl	8
PRC2 EZH2 UP.V1 DN	22/194	0.000466132	0.00338842	0	0	2.19134	16.8099	1.22556	MSigDB_Oncogenic_Signatures	Combo_vs_Ctrl	22
Id Signaling Pathway WP512	1951-08-01	0.00439488	0.0193375	0	0	3.03116	16.4511	1.21619	WikiPathways_2019_Mouse	Combo_vs_Ctrl	8
transcription factor activity, RNA polymerase II core promoter proximal region sequence-specific binding (GO:0000982)	29/280	0.000307934	0.0253165	0	0	2.00138	16.1824	1.20904	GO_Molecular_Function_2018	Combo_vs_Ctrl	29
Lung fibrosis WP3632	1961-09-01	0.00394592	0.0182758	0	0	2.85103	15.7807	1.19813	WikiPathways_2019_Mouse	Combo_vs_Ctrl	9
Regulation of insulin secretion Homo sapiens R-HSA-422356	1980-11-01	0.00267863	0.043599	0	0	2.657	15.736	1.19689	Reactome_2016	Combo_vs_Ctrl	11
IL-3 Signaling Pathway WP373	13/100	0.0019259	0.0109341	0	0	2.51208	15.7064	1.19608	WikiPathways_2019_Mouse	Combo_vs_Ctrl	13
FCERI mediated NF-kB activation Homo sapiens R-HSA-2871837	14/111	0.00176101	0.0320756	0	0	2.43722	15.4565	1.18911	Reactome_2016	Combo_vs_Ctrl	14
BMI1 DN.V1 DN	17/144	0.00126754	0.00772788	0	0	2.28127	15.2176	1.18235	MSigDB_Oncogenic_Signatures	Combo_vs_Ctrl	17
ESC J1 UP EARLY.V1 DN	20/179	0.000996109	0.00649188	0	0	2.15907	14.9227	1.17385	MSigDB_Oncogenic_Signatures	Combo_vs_Ctrl	20
Oxidative Stress WP412	2020-05-28	0.0133745	0.0490399	0	0	3.45066	14.8875	1.17282	WikiPathways_2019_Mouse	Combo_vs_Ctrl	5
G Protein Signaling Pathways WP232	1992-12-01	0.00275142	0.0142426	0	0	2.52048	14.8598	1.17201	WikiPathways_2019_Mouse	Combo_vs_Ctrl	12
transcription corepressor activity (GO:0003714)	22/203	0.000862286	0.0472615	0	0	2.09419	14.7765	1.16957	GO_Molecular_Function_2018	Combo_vs_Ctrl	22
kinase binding (GO:0019900)	39/418	0.000284517	0.0251907	0	0	1.80293	14.7204	1.16792	GO_Molecular_Function_2018	Combo_vs_Ctrl	39
Downstream signal transduction Homo sapiens R-HSA-186763	33/341	0.000427191	0.011078	0	0	1.87003	14.5082	1.16161	Reactome_2016	Combo_vs_Ctrl	33
TBK1.DF UP	29/290	0.000548944	0.00370537	0	0	1.93237	14.5073	1.16159	MSigDB_Oncogenic_Signatures	Combo_vs_Ctrl	29
BMI1 DN MEL18 DN.V1 DN	17/147	0.00159036	0.00910843	0	0	2.23471	14.4	1.15836	MSigDB_Oncogenic_Signatures	Combo_vs_Ctrl	17
DAP12 signaling Homo sapiens R-HSA-2424491	33/344	0.000498851	0.0127207	0	0	1.85372	14.0942	1.14904	Reactome_2016	Combo_vs_Ctrl	33
AKT UP MTOR DN.V1 UP	20/184	0.00139849	0.00825983	0	0	2.1004	13.8046	1.14002	MSigDB_Oncogenic_Signatures	Combo_vs_Ctrl	20
NGF signalling via TRKA from the plasma membrane Homo sapiens R-HSA-187037	35/374	0.000540129	0.0131174	0	0	1.80836	13.6056	1.13372	Reactome_2016	Combo_vs_Ctrl	35
Alzheimers Disease WP2075	1975-10-01	0.00514153	0.0215455	0	0	2.57649	13.5791	1.13287	WikiPathways_2019_Mouse	Combo_vs_Ctrl	10
RB P130 DN.V1 DN	16/139	0.00225847	0.0115365	0	0	2.22431	13.5529	1.13203	MSigDB_Oncogenic_Signatures	Combo_vs_Ctrl	16
ubiquitin protein ligase binding (GO:0031625)	28/284	0.000845662	0.0486678	0	0	1.90515	13.4797	1.12968	GO_Molecular_Function_2018	Combo_vs_Ctrl	28
Signaling by PDGF Homo sapiens R-HSA-186797	34/364	0.000665659	0.0159134	0	0	1.80496	13.2028	1.12067	Reactome_2016	Combo_vs_Ctrl	34
AKT UP.V1 DN	20/187	0.00170085	0.0094547	0	0	2.0667	13.1786	1.11987	MSigDB_Oncogenic_Signatures	Combo_vs_Ctrl	20
MEL18 DN.V1 UP	16/141	0.00261341	0.0129983	0	0	2.19276	13.0405	1.1153	MSigDB_Oncogenic_Signatures	Combo_vs_Ctrl	16
Estrogen Response Early	21/200	0.0016636	0.00519874	0	0	2.02899	12.983	1.11338	MSigDB_Hallmark_2020	Combo_vs_Ctrl	21
Estrogen Response Late	21/200	0.0016636	0.00489293	0	0	2.02899	12.983	1.11338	MSigDB_Hallmark_2020	Combo_vs_Ctrl	21
CYCLIN D1 UP.V1 UP	20/188	0.00181323	0.00979142	0	0	2.05571	12.977	1.11317	MSigDB_Oncogenic_Signatures	Combo_vs_Ctrl	20
KRAS.600.LUNG.BREAST UP.V1 UP	28/288	0.00104815	0.00660333	0	0	1.87869	12.8892	1.11023	MSigDB_Oncogenic_Signatures	Combo_vs_Ctrl	28
CORDENONSI YAP CONSERVED SIGNATURE	1957-08-01	0.00869169	0.0309949	0	0	2.71209	12.8699	1.10958	MSigDB_Oncogenic_Signatures	Combo_vs_Ctrl	8
KRAS.50 UP.V1 UP	1948-07-01	0.0112101	0.0371702	0	0	2.81804	12.6556	1.10228	MSigDB_Oncogenic_Signatures	Combo_vs_Ctrl	7
Downstream signaling of activated FGFR2 Homo sapiens R-HSA-5654696	31/329	0.000977022	0.0226491	0	0	1.82077	12.6198	1.10105	Reactome_2016	Combo_vs_Ctrl	31
Downstream signaling of activated FGFR4 Homo sapiens R-HSA-5654716	31/329	0.000977022	0.0223111	0	0	1.82077	12.6198	1.10105	Reactome_2016	Combo_vs_Ctrl	31
Downstream signaling of activated FGFR3 Homo sapiens R-HSA-5654708	31/329	0.000977022	0.021983	0	0	1.82077	12.6198	1.10105	Reactome_2016	Combo_vs_Ctrl	31
CYCLIN D1 KE .V1 UP	20/190	0.00205695	0.010799	0	0	2.03407	12.5838	1.09981	MSigDB_Oncogenic_Signatures	Combo_vs_Ctrl	20
Signaling by FGFR4 Homo sapiens R-HSA-5654743	31/332	0.00113183	0.0243901	0	0	1.80432	12.2404	1.08779	Reactome_2016	Combo_vs_Ctrl	31
Downstream signaling of activated FGFR1 Homo sapiens R-HSA-5654687	31/332	0.00113183	0.0240514	0	0	1.80432	12.2404	1.08779	Reactome_2016	Combo_vs_Ctrl	31
DAP12 interactions Homo sapiens R-HSA-2172127	33/359	0.00104082	0.0227493	0	0	1.77627	12.199	1.08632	Reactome_2016	Combo_vs_Ctrl	33
Signaling by FGFR3 Homo sapiens R-HSA-5654741	31/333	0.00118798	0.0239158	0	0	1.7989	12.1165	1.08338	Reactome_2016	Combo_vs_Ctrl	31
CRX DN.V1 DN	15/134	0.00398497	0.0175153	0	0	2.1631	11.9516	1.07743	MSigDB_Oncogenic_Signatures	Combo_vs_Ctrl	15
P53 DN.V1 UP	20/194	0.00262808	0.0127361	0	0	1.99213	11.8362	1.07321	MSigDB_Oncogenic_Signatures	Combo_vs_Ctrl	20
Signaling by FGFR1 Homo sapiens R-HSA-5654736	31/336	0.00137122	0.0265565	0	0	1.78284	11.7526	1.07013	Reactome_2016	Combo_vs_Ctrl	31
Class A/1 (Rhodopsin-like receptors) Homo sapiens R-HSA-373076	30/323	0.00146484	0.0276692	0	0	1.79477	11.7127	1.06866	Reactome_2016	Combo_vs_Ctrl	30
Calcium Regulation in the Cardiac Cell WP553	16/147	0.00396592	0.0178975	0	0	2.10326	11.631	1.06562	WikiPathways_2019_Mouse	Combo_vs_Ctrl	16
MEK UP.V1 DN	20/196	0.00296026	0.0139872	0	0	1.9718	11.4808	1.05997	MSigDB_Oncogenic_Signatures	Combo_vs_Ctrl	20
MTOR UP.N4.V1 UP	20/196	0.00296026	0.0136461	0	0	1.9718	11.4808	1.05997	MSigDB_Oncogenic_Signatures	Combo_vs_Ctrl	20
Signaling by SCF-KIT Homo sapiens R-HSA-1433557	30/325	0.00161175	0.0297105	0	0	1.78372	11.4701	1.05957	Reactome_2016	Combo_vs_Ctrl	30
mTORC1 Signaling	20/200	0.00373067	0.010363	0	0	1.93237	10.8042	1.03359	MSigDB_Hallmark_2020	Combo_vs_Ctrl	20
CAMP UP.V1 DN	20/200	0.00373067	0.016788	0	0	1.93237	10.8042	1.03359	MSigDB_Oncogenic_Signatures	Combo_vs_Ctrl	20
PI3K/AKT/mTOR Signaling	12/105	0.00804261	0.0182787	0	0	2.20842	10.6512	1.0274	MSigDB_Hallmark_2020	Combo_vs_Ctrl	12
Signaling by FGFR2 Homo sapiens R-HSA-5654738	32/361	0.00220049	0.0378287	0	0	1.7129	10.4814	1.02042	Reactome_2016	Combo_vs_Ctrl	32
EGFR1 Signaling Pathway WP572	18/178	0.00512147	0.0219848	0	0	1.95408	10.3064	1.01311	WikiPathways_2019_Mouse	Combo_vs_Ctrl	18
ERB2 UP.V1 UP	19/191	0.00489806	0.0210394	0	0	1.92225	10.2243	1.00963	MSigDB_Oncogenic_Signatures	Combo_vs_Ctrl	19
ESC J1 UP LATE.V1 UP	19/191	0.00489806	0.0205718	0	0	1.92225	10.2243	1.00963	MSigDB_Oncogenic_Signatures	Combo_vs_Ctrl	19
JNK DN.V1 UP	19/192	0.00518034	0.0212845	0	0	1.91224	10.0639	1.00277	MSigDB_Oncogenic_Signatures	Combo_vs_Ctrl	19
Cholesterol Homeostasis	1974-09-01	0.0138826	0.0301795	0	0	2.35018	10.052	1.00225	MSigDB_Hallmark_2020	Combo_vs_Ctrl	9
Signaling by FGFR Homo sapiens R-HSA-190236	32/366	0.00272517	0.0438896	0	0	1.6895	9.97688	0.998995	Reactome_2016	Combo_vs_Ctrl	32
GCNP SHH UP LATE.V1 DN	18/180	0.0057473	0.0231115	0	0	1.93237	9.96913	0.998657	MSigDB_Oncogenic_Signatures	Combo_vs_Ctrl	18
UV Response Dn	15/144	0.00773073	0.020344	0	0	2.01288	9.78774	0.990683	MSigDB_Hallmark_2020	Combo_vs_Ctrl	15
MEK UP.V1 UP	19/196	0.0064463	0.0253823	0	0	1.87321	9.44895	0.975384	MSigDB_Oncogenic_Signatures	Combo_vs_Ctrl	19
MTOR UP.V1 DN	18/184	0.00718627	0.0277185	0	0	1.89036	9.33002	0.969883	MSigDB_Oncogenic_Signatures	Combo_vs_Ctrl	18
ESC V6.5 UP EARLY.V1 DN	17/172	0.00799921	0.0296441	0	0	1.9099	9.22177	0.964814	MSigDB_Oncogenic_Signatures	Combo_vs_Ctrl	17
EIF4E DN	11/100	0.0142808	0.0442471	0	0	2.1256	9.03135	0.955753	MSigDB_Oncogenic_Signatures	Combo_vs_Ctrl	11
CAHOY ASTROGLIAL	11/100	0.0142808	0.0435334	0	0	2.1256	9.03135	0.955753	MSigDB_Oncogenic_Signatures	Combo_vs_Ctrl	11
Epithelial Mesenchymal Transition	19/200	0.00795372	0.0198843	0	0	1.83575	8.87422	0.94813	MSigDB_Hallmark_2020	Combo_vs_Ctrl	19
heme Metabolism	19/200	0.00795372	0.0189374	0	0	1.83575	8.87422	0.94813	MSigDB_Hallmark_2020	Combo_vs_Ctrl	19
CAMP UP.V1 UP	19/200	0.00795372	0.0300651	0	0	1.83575	8.87422	0.94813	MSigDB_Oncogenic_Signatures	Combo_vs_Ctrl	19
Focal Adhesion-PI3K-Akt-mTOR-signaling pathway WP2841	28/324	0.00566667	0.0231938	0	0	1.66995	8.63889	0.936458	WikiPathways_2019_Mouse	Combo_vs_Ctrl	28
SNF5 DN.V1 UP	17/177	0.0105027	0.0354466	0	0	1.85595	8.45592	0.927161	MSigDB_Oncogenic_Signatures	Combo_vs_Ctrl	17
LTE2 UP.V1 UP	18/190	0.00987819	0.0345737	0	0	1.83066	8.45295	0.927008	MSigDB_Oncogenic_Signatures	Combo_vs_Ctrl	18
RAPA EARLY UP.V1 DN	18/191	0.0103964	0.0357257	0	0	1.82108	8.31559	0.919893	MSigDB_Oncogenic_Signatures	Combo_vs_Ctrl	18
STK33 SKM DN	25/288	0.00816103	0.0296622	0	0	1.6774	8.0656	0.906636	MSigDB_Oncogenic_Signatures	Combo_vs_Ctrl	25
KRAS.DF.V1 UP	18/193	0.0114976	0.0374662	0	0	1.80221	8.04798	0.905687	MSigDB_Oncogenic_Signatures	Combo_vs_Ctrl	18
WNT UP.V1 UP	17/180	0.0122802	0.0393381	0	0	1.82501	8.02964	0.904696	MSigDB_Oncogenic_Signatures	Combo_vs_Ctrl	17
PKCA DN.V1 DN	16/167	0.0130744	0.0411845	0	0	1.85137	8.02957	0.904692	MSigDB_Oncogenic_Signatures	Combo_vs_Ctrl	16
PTEN DN.V2 UP	14/143	0.0163767	0.0483624	0	0	1.89183	7.779	0.890924	MSigDB_Oncogenic_Signatures	Combo_vs_Ctrl	14
PluriNetWork WP1763	25/292	0.00963	0.037664	0	0	1.65442	7.68128	0.885434	WikiPathways_2019_Mouse	Combo_vs_Ctrl	25
ESC J1 UP EARLY.V1 UP	17/183	0.0142864	0.0428591	0	0	1.7951	7.62637	0.882318	MSigDB_Oncogenic_Signatures	Combo_vs_Ctrl	17
Non-odorant GPCRs WP1396	23/267	0.011821	0.0452282	0	0	1.66459	7.38723	0.868481	WikiPathways_2019_Mouse	Combo_vs_Ctrl	23
AKT UP.V1 UP	16/172	0.0169088	0.0491657	0	0	1.79755	7.33386	0.865333	MSigDB_Oncogenic_Signatures	Combo_vs_Ctrl	16
Apical Junction	18/200	0.0160966	0.0335346	0	0	1.73913	7.18113	0.856193	MSigDB_Hallmark_2020	Combo_vs_Ctrl	18
ATF2 UP.V1 DN	17/187	0.0173492	0.0496818	0	0	1.7567	7.12202	0.852603	MSigDB_Oncogenic_Signatures	Combo_vs_Ctrl	17
STK33 NOMO DN	24/292	0.0174081	0.0491065	0	0	1.58825	6.4337	0.808461	MSigDB_Oncogenic_Signatures	Combo_vs_Ctrl	24
Hemostasis Homo sapiens R-HSA-109582	33/552	0.00557704	0.0379239	0	0	1.60061	8.3057	-0.919376	Reactome_2016	Combo_vs_Ctrl	33
Metabolism Homo sapiens R-HSA-1430728	96/1908	0.00153715	0.0120607	0	0	1.34711	8.72633	-0.940832	Reactome_2016	Combo_vs_Ctrl	96
Post-translational protein modification Homo sapiens R-HSA-597592	32/521	0.00424837	0.0299539	0	0	1.64445	8.98072	-0.953311	Reactome_2016	Combo_vs_Ctrl	32
Metabolism of proteins Homo sapiens R-HSA-392499	59/1074	0.00195697	0.0150461	0	0	1.47081	9.17251	-0.962488	Reactome_2016	Combo_vs_Ctrl	59
Estrogen Response Late	15/200	0.00829001	0.0376819	0	0	2.00803	9.6239	-0.983351	MSigDB_Hallmark_2020	Combo_vs_Ctrl	15
Chromatin organization Homo sapiens R-HSA-4839726	17/226	0.00500653	0.0348182	0	0	2.01396	10.6679	-1.02808	Reactome_2016	Combo_vs_Ctrl	17
Chromatin modifying enzymes Homo sapiens R-HSA-3247509	17/226	0.00500653	0.0346606	0	0	2.01396	10.6679	-1.02808	Reactome_2016	Combo_vs_Ctrl	17
HIV Infection Homo sapiens R-HSA-162906	17/222	0.00418964	0.0296766	0	0	2.05024	11.2254	-1.0502	Reactome_2016	Combo_vs_Ctrl	17
ESC V6.5 UP LATE.V1 DN	15/186	0.00430604	0.0313016	0	0	2.15917	11.7626	-1.0705	MSigDB_Oncogenic_Signatures	Combo_vs_Ctrl	15
nucleoside-triphosphatase activity (GO:0017111)	29/424	0.0013539	0.0354168	0	0	1.83122	12.0948	-1.0826	GO_Molecular_Function_2018	Combo_vs_Ctrl	29
Metabolism of carbohydrates Homo sapiens R-HSA-71387	21/282	0.00219467	0.0165411	0	0	1.99379	12.2054	-1.08655	Reactome_2016	Combo_vs_Ctrl	21
Nucleotide Excision Repair Homo sapiens R-HSA-5696398	10/108	0.00717575	0.0473228	0	0	2.47905	12.2392	-1.08775	Reactome_2016	Combo_vs_Ctrl	10
protein serine/threonine kinase activity (GO:0004674)	26/368	0.0014939	0.0382106	0	0	1.89162	12.3076	-1.09017	GO_Molecular_Function_2018	Combo_vs_Ctrl	26
Influenza Life Cycle Homo sapiens R-HSA-168255	12/136	0.00501308	0.0345496	0	0	2.36239	12.5105	-1.09728	Reactome_2016	Combo_vs_Ctrl	12
Major pathway of rRNA processing in the nucleolus Homo sapiens R-HSA-6791226	14/166	0.00384232	0.0274708	0	0	2.25803	12.5584	-1.09894	Reactome_2016	Combo_vs_Ctrl	14
Spermatogenesis	12/135	0.00472653	0.0236327	0	0	2.37989	12.7433	-1.10528	MSigDB_Hallmark_2020	Combo_vs_Ctrl	12
Organelle biogenesis and maintenance Homo sapiens R-HSA-1852241	24/326	0.00129029	0.010282	0	0	1.97107	13.1133	-1.11771	Reactome_2016	Combo_vs_Ctrl	24
Influenza Infection Homo sapiens R-HSA-168254	13/147	0.00350198	0.0253935	0	0	2.36775	13.3883	-1.12672	Reactome_2016	Combo_vs_Ctrl	13
ATF2 UP.V1 UP	16/192	0.00234747	0.0177469	0	0	2.23115	13.5083	-1.1306	MSigDB_Oncogenic_Signatures	Combo_vs_Ctrl	16
STK33 DN	22/289	0.00131998	0.0108468	0	0	2.03814	13.5132	-1.13076	MSigDB_Oncogenic_Signatures	Combo_vs_Ctrl	22
Mitochondrial translation Homo sapiens R-HSA-5368287	1990-09-01	0.00642597	0.0429334	0	0	2.67738	13.5138	-1.13078	Reactome_2016	Combo_vs_Ctrl	9
Unfolded Protein Response	11/113	0.00336319	0.0186844	0	0	2.6063	14.8425	-1.17151	MSigDB_Hallmark_2020	Combo_vs_Ctrl	11
CAMP UP.V1 UP	17/200	0.00140785	0.0110868	0	0	2.27577	14.942	-1.17441	MSigDB_Oncogenic_Signatures	Combo_vs_Ctrl	17
adenyl ribonucleotide binding (GO:0032559)	22/279	0.000835632	0.0229003	0	0	2.11119	14.9627	-1.17501	GO_Molecular_Function_2018	Combo_vs_Ctrl	22
MTOR UP.N4.V1 UP	17/196	0.00112917	0.00970058	0	0	2.32221	15.7592	-1.19753	MSigDB_Oncogenic_Signatures	Combo_vs_Ctrl	17
TBK1.DF DN	23/287	0.000514469	0.00463022	0	0	2.14563	16.2475	-1.21079	MSigDB_Oncogenic_Signatures	Combo_vs_Ctrl	23
ATP binding (GO:0005524)	21/255	0.000622701	0.019371	0	0	2.2049	16.2753	-1.21153	GO_Molecular_Function_2018	Combo_vs_Ctrl	21
Global Genome Nucleotide Excision Repair (GG-NER) Homo sapiens R-HSA-5696399	1982-09-01	0.00346595	0.0252519	0	0	2.93858	16.6464	-1.22132	Reactome_2016	Combo_vs_Ctrl	9
Transcriptional Regulation by TP53 Homo sapiens R-HSA-3700989	27/348	0.000294027	0.00272644	0	0	2.07727	16.8921	-1.22768	Reactome_2016	Combo_vs_Ctrl	27
Cyclin A:Cdk2-associated events at S phase entry Homo sapiens R-HSA-69656	1969-08-01	0.00408722	0.0290858	0	0	3.1042	17.0728	-1.2323	Reactome_2016	Combo_vs_Ctrl	8
purine ribonucleoside triphosphate binding (GO:0035639)	30/396	0.000210052	0.00732637	0	0	2.02832	17.1761	-1.23492	GO_Molecular_Function_2018	Combo_vs_Ctrl	30
DNA Damage Bypass Homo sapiens R-HSA-73893	1946-06-01	0.00698008	0.0462317	0	0	3.49223	17.3379	-1.239	Reactome_2016	Combo_vs_Ctrl	6
ATPase activity (GO:0016887)	18/203	0.000632327	0.0191529	0	0	2.37403	17.4873	-1.24272	GO_Molecular_Function_2018	Combo_vs_Ctrl	18
Amyloid fiber formation Homo sapiens R-HSA-977225	1968-08-01	0.0037326	0.0269381	0	0	3.14985	17.6097	-1.24575	Reactome_2016	Combo_vs_Ctrl	8
Cyclin E associated events during G1/S transition Homo sapiens R-HSA-69202	1968-08-01	0.0037326	0.0268117	0	0	3.14985	17.6097	-1.24575	Reactome_2016	Combo_vs_Ctrl	8
Host Interactions of HIV factors Homo sapiens R-HSA-162909	13/129	0.00108923	0.00872527	0	0	2.69813	18.4074	-1.26499	Reactome_2016	Combo_vs_Ctrl	13
Transcription-Coupled Nucleotide Excision Repair (TC-NER) Homo sapiens R-HSA-6781827	1976-09-01	0.00205261	0.015547	0	0	3.17058	19.6216	-1.29273	Reactome_2016	Combo_vs_Ctrl	9
protein kinase binding (GO:0019901)	37/495	5.31475e-05	0.00278058	0	0	2.00127	19.6974	-1.29441	GO_Molecular_Function_2018	Combo_vs_Ctrl	37
DNA Repair	15/150	0.000505905	0.00316191	0	0	2.67738	20.319	-1.3079	MSigDB_Hallmark_2020	Combo_vs_Ctrl	15
Dual incision in TC-NER Homo sapiens R-HSA-6782135	1963-08-01	0.00230102	0.0171735	0	0	3.39984	20.652	-1.31496	Reactome_2016	Combo_vs_Ctrl	8
Non-integrin membrane-ECM interactions Homo sapiens R-HSA-3000171	1942-06-01	0.00443212	0.0311062	0	0	3.82482	20.7262	-1.31652	Reactome_2016	Combo_vs_Ctrl	6
APC/C:Cdc20 mediated degradation of mitotic proteins Homo sapiens R-HSA-176409	1974-09-01	0.00170089	0.01321	0	0	3.25627	20.7639	-1.31731	Reactome_2016	Combo_vs_Ctrl	9
endonuclease activity (GO:0004519)	1973-09-01	0.00154412	0.0386367	0	0	3.30087	21.3675	-1.32975	GO_Molecular_Function_2018	Combo_vs_Ctrl	9
Cellular response to heat stress Homo sapiens R-HSA-3371556	1996-11-01	0.000901366	0.00737481	0	0	3.06783	21.5104	-1.33265	Reactome_2016	Combo_vs_Ctrl	11
ERB2 UP.V1 DN	19/197	0.000154836	0.0014632	0	0	2.58224	22.6544	-1.35515	MSigDB_Oncogenic_Signatures	Combo_vs_Ctrl	19
COPI-dependent Golgi-to-ER retrograde traffic Homo sapiens R-HSA-6811434	1981-10-01	0.000852451	0.0070121	0	0	3.3054	23.3606	-1.36848	Reactome_2016	Combo_vs_Ctrl	10
RNA Polymerase I, RNA Polymerase III, and Mitochondrial Transcription Homo sapiens R-HSA-504046	13/116	0.000395956	0.00348168	0	0	3.00051	23.5066	-1.37119	Reactome_2016	Combo_vs_Ctrl	13
Factors involved in megakaryocyte development and platelet production Homo sapiens R-HSA-983231	15/141	0.000259591	0.00245169	0	0	2.84827	23.5165	-1.37137	Reactome_2016	Combo_vs_Ctrl	15
Late Phase of HIV Life Cycle Homo sapiens R-HSA-162599	14/128	0.000309402	0.00285172	0	0	2.92838	23.6639	-1.37409	Reactome_2016	Combo_vs_Ctrl	14
magnesium ion binding (GO:0000287)	14/127	0.00028515	0.00911687	0	0	2.95144	24.0911	-1.38186	GO_Molecular_Function_2018	Combo_vs_Ctrl	14
Cellular responses to stress Homo sapiens R-HSA-2262752	31/367	2.18889e-05	0.000251805	0	0	2.26154	24.2653	-1.38499	Reactome_2016	Combo_vs_Ctrl	31
Recruitment and ATM-mediated phosphorylation of repair and signaling proteins at DNA double strand breaks Homo sapiens R-HSA-5693565	1958-08-01	0.00134058	0.0106274	0	0	3.69293	24.4275	-1.38788	Reactome_2016	Combo_vs_Ctrl	8
histone methyltransferase activity (GO:0042054)	1948-07-01	0.00191156	0.0440042	0	0	3.90451	24.4416	-1.38813	GO_Molecular_Function_2018	Combo_vs_Ctrl	7
Regulation of APC/C activators between G1/S and early anaphase Homo sapiens R-HSA-176408	1979-10-01	0.000698929	0.0058435	0	0	3.38908	24.625	-1.39138	Reactome_2016	Combo_vs_Ctrl	10
G1 Phase Homo sapiens R-HSA-69236	1938-06-01	0.00264565	0.0195548	0	0	4.22744	25.0891	-1.39949	Reactome_2016	Combo_vs_Ctrl	6
Cyclin D associated events in G1 Homo sapiens R-HSA-69231	1938-06-01	0.00264565	0.0194608	0	0	4.22744	25.0891	-1.39949	Reactome_2016	Combo_vs_Ctrl	6
methyltransferase activity (GO:0008168)	1967-09-01	0.000829151	0.0232769	0	0	3.59648	25.5174	-1.40684	GO_Molecular_Function_2018	Combo_vs_Ctrl	9
ESC J1 UP LATE.V1 DN	19/186	7.21055e-05	0.00071726	0	0	2.73495	26.0843	-1.41638	MSigDB_Oncogenic_Signatures	Combo_vs_Ctrl	19
Translesion synthesis by Y family DNA polymerases bypasses lesions on DNA template Homo sapiens R-HSA-110313	1937-06-01	0.00229936	0.0172452	0	0	4.34169	26.3763	-1.42121	Reactome_2016	Combo_vs_Ctrl	6
Anchoring of the basal body to the plasma membrane Homo sapiens R-HSA-5620912	1997-12-01	0.000262437	0.00246337	0	0	3.31222	27.3109	-1.43634	Reactome_2016	Combo_vs_Ctrl	12
Activation of APC/C and APC/C:Cdc20 mediated degradation of mitotic proteins Homo sapiens R-HSA-176814	1975-10-01	0.000459636	0.00397312	0	0	3.56983	27.4345	-1.4383	Reactome_2016	Combo_vs_Ctrl	10
DNA binding (GO:0003677)	64/893	4.55736e-07	8.74254e-05	0	0	1.91884	28.0176	-1.44743	GO_Molecular_Function_2018	Combo_vs_Ctrl	64
Transport of Mature Transcript to Cytoplasm Homo sapiens R-HSA-72202	1974-10-01	0.000411895	0.00358068	0	0	3.61808	28.202	-1.45028	Reactome_2016	Combo_vs_Ctrl	10
Positive epigenetic regulation of rRNA expression Homo sapiens R-HSA-5250913	1973-10-01	0.00036835	0.00325767	0	0	3.66764	28.9981	-1.46237	Reactome_2016	Combo_vs_Ctrl	10
kinase binding (GO:0019900)	36/418	3.12929e-06	0.000360182	0	0	2.30587	29.2263	-1.46577	GO_Molecular_Function_2018	Combo_vs_Ctrl	36
Fanconi Anemia Pathway Homo sapiens R-HSA-6783310	1935-06-01	0.00171014	0.0132147	0	0	4.58979	29.2424	-1.46601	Reactome_2016	Combo_vs_Ctrl	6
SNF5 DN.V1 UP	19/177	3.65544e-05	0.000383822	0	0	2.87402	29.363	-1.4678	MSigDB_Oncogenic_Signatures	Combo_vs_Ctrl	19
Regulation of TP53 Activity Homo sapiens R-HSA-5633007	17/151	5.07963e-05	0.000543484	0	0	3.01426	29.8041	-1.47428	Reactome_2016	Combo_vs_Ctrl	17
ISG15 antiviral mechanism Homo sapiens R-HSA-1169408	1972-10-01	0.000328708	0.00299359	0	0	3.71858	29.8243	-1.47457	Reactome_2016	Combo_vs_Ctrl	10
Antiviral mechanism by IFN-stimulated genes Homo sapiens R-HSA-1169410	1972-10-01	0.000328708	0.00297588	0	0	3.71858	29.8243	-1.47457	Reactome_2016	Combo_vs_Ctrl	10
Gap-filling DNA repair synthesis and ligation in TC-NER Homo sapiens R-HSA-6782210	1962-09-01	0.00046423	0.00399029	0	0	3.88651	29.8295	-1.47465	Reactome_2016	Combo_vs_Ctrl	9
ERCC6 (CSB) and EHMT2 (G9a) positively regulate rRNA expression Homo sapiens R-HSA-427389	1943-07-01	0.000982857	0.00791459	0	0	4.35852	30.183	-1.47976	Reactome_2016	Combo_vs_Ctrl	7
Oxidative Stress Induced Senescence Homo sapiens R-HSA-2559580	1991-12-01	0.000142384	0.00140547	0	0	3.53061	31.2705	-1.49513	Reactome_2016	Combo_vs_Ctrl	12
Regulation of HSF1-mediated heat shock response Homo sapiens R-HSA-3371453	1980-11-01	0.000183528	0.0017772	0	0	3.68139	31.6716	-1.50067	Reactome_2016	Combo_vs_Ctrl	11
RHO GTPases activate PKNs Homo sapiens R-HSA-5625740	1960-09-01	0.00036149	0.00323438	0	0	4.01606	31.8284	-1.50282	Reactome_2016	Combo_vs_Ctrl	9
AKT UP MTOR DN.V1 DN	20/183	1.76729e-05	0.000196481	0	0	2.92609	32.0216	-1.50544	MSigDB_Oncogenic_Signatures	Combo_vs_Ctrl	20
Androgen Response	13/100	8.8299e-05	0.000630707	0	0	3.48059	32.4905	-1.51176	MSigDB_Hallmark_2020	Combo_vs_Ctrl	13
RNA Polymerase I Transcription Homo sapiens R-HSA-73864	1979-11-01	0.000163727	0.00160579	0	0	3.72799	32.4981	-1.51186	Reactome_2016	Combo_vs_Ctrl	11
DNA Double Strand Break Response Homo sapiens R-HSA-5693606	1959-09-01	0.000317634	0.00291006	0	0	4.08413	32.8961	-1.51714	Reactome_2016	Combo_vs_Ctrl	9
APC-Cdc20 mediated degradation of Nek2A Homo sapiens R-HSA-179409	2020-05-25	0.00204509	0.015645	0	0	5.35475	33.1583	-1.52059	Reactome_2016	Combo_vs_Ctrl	5
Synthesis and interconversion of nucleotide di- and triphosphates Homo sapiens R-HSA-499943	2020-05-25	0.00204509	0.0155671	0	0	5.35475	33.1583	-1.52059	Reactome_2016	Combo_vs_Ctrl	5
rRNA processing Homo sapiens R-HSA-72312	20/180	1.38398e-05	0.000166731	0	0	2.97486	33.2826	-1.52222	Reactome_2016	Combo_vs_Ctrl	20
Transport of Mature mRNA derived from an Intron-Containing Transcript Homo sapiens R-HSA-159236	1968-10-01	0.000203787	0.00196096	0	0	3.93732	33.4611	-1.52454	Reactome_2016	Combo_vs_Ctrl	10
SRC UP.V1 DN	20/179	1.27393e-05	0.000150483	0	0	2.99148	33.7165	-1.52784	MSigDB_Oncogenic_Signatures	Combo_vs_Ctrl	20
Formation of the beta-catenin:TCF transactivating complex Homo sapiens R-HSA-201722	1958-09-01	0.000278267	0.00259603	0	0	4.15455	34.013	-1.53164	Reactome_2016	Combo_vs_Ctrl	9
tubulin binding (GO:0015631)	26/255	3.74838e-06	0.000392216	0	0	2.72987	34.1076	-1.53285	GO_Molecular_Function_2018	Combo_vs_Ctrl	26
Assembly of the pre-replicative complex Homo sapiens R-HSA-68867	1967-10-01	0.000179743	0.00175164	0	0	3.99608	34.4622	-1.53734	Reactome_2016	Combo_vs_Ctrl	10
HIV Life Cycle Homo sapiens R-HSA-162587	17/141	2.09177e-05	0.000242455	0	0	3.22804	34.7819	-1.54135	Reactome_2016	Combo_vs_Ctrl	17
RNA Polymerase I Promoter Clearance Homo sapiens R-HSA-73854	1976-11-01	0.000114827	0.00114827	0	0	3.87515	35.1557	-1.546	Reactome_2016	Combo_vs_Ctrl	11
TP53 Regulates Transcription of Cell Cycle Genes Homo sapiens R-HSA-6791312	1948-08-01	0.000366171	0.00325722	0	0	4.46229	35.3075	-1.54787	Reactome_2016	Combo_vs_Ctrl	8
endoribonuclease activity, producing 5'-phosphomonoesters (GO:0016891)	2020-05-24	0.00168734	0.0396352	0	0	5.57787	35.6125	-1.5516	GO_Molecular_Function_2018	Combo_vs_Ctrl	5
MYC UP.V1 UP	21/186	6.61395e-06	8.33358e-05	0	0	3.02284	36.0514	-1.55692	MSigDB_Oncogenic_Signatures	Combo_vs_Ctrl	21
NoRC negatively regulates rRNA expression Homo sapiens R-HSA-427413	1973-11-01	7.89624e-05	0.000810822	0	0	4.0344	38.1111	-1.58105	Reactome_2016	Combo_vs_Ctrl	11
damaged DNA binding (GO:0003684)	1946-08-01	0.000270397	0.00889218	0	0	4.65631	38.2544	-1.58268	GO_Molecular_Function_2018	Combo_vs_Ctrl	8
Termination of translesion DNA synthesis Homo sapiens R-HSA-5656169	2020-06-30	0.000732995	0.00609502	0	0	5.35475	38.6526	-1.58718	Reactome_2016	Combo_vs_Ctrl	6
Gene Expression Homo sapiens R-HSA-74160	112/1631	1.68557e-10	5.48708e-09	0	0	1.83854	41.3741	-1.61673	Reactome_2016	Combo_vs_Ctrl	112
Role of BRCA1, BRCA2 and ATR in Cancer Susceptibility Homo sapiens h atrbrcaPathway	2020-05-22	0.00111205	0.0292841	0	0	6.08495	41.387	-1.61686	BioCarta_2016	Combo_vs_Ctrl	5
Switching of origins to a post-replicative state Homo sapiens R-HSA-69052	1970-11-01	5.31454e-05	0.000560775	0	0	4.20731	41.4103	-1.61711	Reactome_2016	Combo_vs_Ctrl	11
Orc1 removal from chromatin Homo sapiens R-HSA-68949	1970-11-01	5.31454e-05	0.000556934	0	0	4.20731	41.4103	-1.61711	Reactome_2016	Combo_vs_Ctrl	11
microtubule motor activity (GO:0003777)	1960-10-01	6.91177e-05	0.00294646	0	0	4.46229	42.7474	-1.63091	GO_Molecular_Function_2018	Combo_vs_Ctrl	10
Cellular Senescence Homo sapiens R-HSA-2559583	20/161	2.52344e-06	3.86087e-05	0	0	3.32593	42.8709	-1.63216	Reactome_2016	Combo_vs_Ctrl	20
Apoptotic execution phase Homo sapiens R-HSA-75153	1951-09-01	0.000100335	0.00100995	0	0	4.72478	43.501	-1.6385	Reactome_2016	Combo_vs_Ctrl	9
Recognition of DNA damage by PCNA-containing replication complex Homo sapiens R-HSA-110314	2020-06-28	0.000495586	0.00423601	0	0	5.73723	43.659	-1.64007	Reactome_2016	Combo_vs_Ctrl	6
RB DN.V1 UP	18/137	3.5638e-06	4.81112e-05	0	0	3.51772	44.1287	-1.64472	MSigDB_Oncogenic_Signatures	Combo_vs_Ctrl	18
DNA polymerase activity (GO:0034061)	2020-05-21	0.000886321	0.0237246	0	0	6.37471	44.8042	-1.65132	GO_Molecular_Function_2018	Combo_vs_Ctrl	5
Epigenetic regulation of gene expression Homo sapiens R-HSA-212165	16/115	5.82393e-06	7.81633e-05	0	0	3.72505	44.9	-1.65225	Reactome_2016	Combo_vs_Ctrl	16
Negative epigenetic regulation of rRNA expression Homo sapiens R-HSA-5250941	1976-12-01	2.33251e-05	0.000266324	0	0	4.22744	45.0897	-1.65408	Reactome_2016	Combo_vs_Ctrl	12
motor activity (GO:0003774)	13/85	1.5329e-05	0.00117624	0	0	4.09481	45.3941	-1.657	GO_Molecular_Function_2018	Combo_vs_Ctrl	13
B-WICH complex positively regulates rRNA expression Homo sapiens R-HSA-5250924	1958-10-01	5.11625e-05	0.000543602	0	0	4.61617	45.61	-1.65906	Reactome_2016	Combo_vs_Ctrl	10
Activated PKN1 stimulates transcription of AR (androgen receptor) regulated genes KLK2 and KLK3 Homo sapiens R-HSA-5625886	1934-07-01	0.000219562	0.00209957	0	0	5.51225	46.4345	-1.66684	Reactome_2016	Combo_vs_Ctrl	7
Purine metabolism Homo sapiens R-HSA-73847	1934-07-01	0.000219562	0.00208653	0	0	5.51225	46.4345	-1.66684	Reactome_2016	Combo_vs_Ctrl	7
RNA Polymerase I Chain Elongation Homo sapiens R-HSA-73777	1957-10-01	4.37897e-05	0.000475165	0	0	4.69715	47.1411	-1.6734	Reactome_2016	Combo_vs_Ctrl	10
protein methyltransferase activity (GO:0008276)	1941-08-01	0.000116721	0.0046326	0	0	5.22415	47.3085	-1.67494	GO_Molecular_Function_2018	Combo_vs_Ctrl	8
aminoacyl-tRNA ligase activity (GO:0004812)	1941-08-01	0.000116721	0.00447818	0	0	5.22415	47.3085	-1.67494	GO_Molecular_Function_2018	Combo_vs_Ctrl	8
DNA-directed DNA polymerase activity (GO:0003887)	2020-05-20	0.000696537	0.0205568	0	0	6.69344	48.6572	-1.68715	GO_Molecular_Function_2018	Combo_vs_Ctrl	5
methyl-CpG binding (GO:0008327)	2020-05-20	0.000696537	0.0200428	0	0	6.69344	48.6572	-1.68715	GO_Molecular_Function_2018	Combo_vs_Ctrl	5
Hexose transport Homo sapiens R-HSA-189200	1948-09-01	6.11254e-05	0.000636204	0	0	5.02008	48.7077	-1.6876	Reactome_2016	Combo_vs_Ctrl	9
microtubule binding (GO:0008017)	24/195	3.04944e-07	7.0198e-05	0	0	3.29523	49.4388	-1.69407	GO_Molecular_Function_2018	Combo_vs_Ctrl	24
Cell Cycle: G1/S Check Point Homo sapiens h g1Pathway	2020-06-26	0.000322759	0.012749	0	0	6.17856	49.667	-1.69607	BioCarta_2016	Combo_vs_Ctrl	6
Removal of licensing factors from origins Homo sapiens R-HSA-69300	1972-12-01	1.32401e-05	0.000160773	0	0	4.46229	50.1216	-1.70003	Reactome_2016	Combo_vs_Ctrl	12
Purine metabolism WP2185	22/171	4.37827e-07	2.56858e-05	0	0	3.44458	50.4336	-1.70272	WikiPathways_2019_Mouse	Combo_vs_Ctrl	22
double-stranded DNA binding (GO:0003690)	15/99	3.88555e-06	0.000372689	0	0	4.05663	50.5385	-1.70362	GO_Molecular_Function_2018	Combo_vs_Ctrl	15
Dual Incision in GG-NER Homo sapiens R-HSA-5696400	1939-08-01	8.02779e-05	0.000818835	0	0	5.49205	51.7902	-1.71425	Reactome_2016	Combo_vs_Ctrl	8
mTORC1 Signaling	25/200	1.28174e-07	1.06812e-06	0	0	3.34672	53.112	-1.72519	MSigDB_Hallmark_2020	Combo_vs_Ctrl	25
Loss of Nlp from mitotic centrosomes Homo sapiens R-HSA-380259	1969-12-01	8.41614e-06	0.000106419	0	0	4.65631	54.4106	-1.73568	Reactome_2016	Combo_vs_Ctrl	12
Loss of proteins required for interphase microtubule organization?from the centrosome Homo sapiens R-HSA-380284	1969-12-01	8.41614e-06	0.000105547	0	0	4.65631	54.4106	-1.73568	Reactome_2016	Combo_vs_Ctrl	12
Packaging Of Telomere Ends Homo sapiens R-HSA-171306	2020-07-31	0.000118307	0.00117539	0	0	6.04569	54.6665	-1.73772	Reactome_2016	Combo_vs_Ctrl	7
RMTs methylate histone arginines Homo sapiens R-HSA-3214858	1945-09-01	3.56975e-05	0.000390122	0	0	5.35475	54.835	-1.73906	Reactome_2016	Combo_vs_Ctrl	9
Senescence-Associated Secretory Phenotype (SASP) Homo sapiens R-HSA-2559582	13/77	5.01636e-06	6.79207e-05	0	0	4.52025	55.1597	-1.74162	Reactome_2016	Combo_vs_Ctrl	13
RB P130 DN.V1 UP	19/133	5.25135e-07	7.63465e-06	0	0	3.82482	55.3055	-1.74277	MSigDB_Oncogenic_Signatures	Combo_vs_Ctrl	19
APC/C-mediated degradation of cell cycle proteins Homo sapiens R-HSA-174143	14/85	2.96083e-06	4.44124e-05	0	0	4.4098	56.1369	-1.74925	Reactome_2016	Combo_vs_Ctrl	14
Regulation of mitotic cell cycle Homo sapiens R-HSA-453276	14/85	2.96083e-06	4.39812e-05	0	0	4.4098	56.1369	-1.74925	Reactome_2016	Combo_vs_Ctrl	14
p53 signaling WP2902	1967-12-01	6.13037e-06	0.000215789	0	0	4.7953	57.5544	-1.76008	WikiPathways_2019_Mouse	Combo_vs_Ctrl	12
RNA Polymerase I Promoter Opening Homo sapiens R-HSA-73728	2020-07-30	9.46198e-05	0.00095873	0	0	6.24721	57.8844	-1.76256	Reactome_2016	Combo_vs_Ctrl	7
TP53 Regulates Transcription of Genes Involved in G2 Cell Cycle Arrest Homo sapiens R-HSA-6804114	2020-05-18	0.000409566	0.00358077	0	0	7.43716	58.0129	-1.76352	Reactome_2016	Combo_vs_Ctrl	5
SUMOylation of DNA damage response and repair proteins Homo sapiens R-HSA-3108214	13/75	3.70195e-06	5.24443e-05	0	0	4.64079	58.0407	-1.76373	Reactome_2016	Combo_vs_Ctrl	13
Regulation of DNA replication Homo sapiens R-HSA-69304	13/75	3.70195e-06	5.19632e-05	0	0	4.64079	58.0407	-1.76373	Reactome_2016	Combo_vs_Ctrl	13
RNA binding (GO:0003723)	107/1387	4.15635e-13	4.78396e-10	0	0	2.06546	58.8841	-1.77	GO_Molecular_Function_2018	Combo_vs_Ctrl	107
Meiotic synapsis Homo sapiens R-HSA-1221632	1957-11-01	7.04249e-06	9.05463e-05	0	0	5.16687	61.2974	-1.78744	Reactome_2016	Combo_vs_Ctrl	11
Glucose transport Homo sapiens R-HSA-70153	1942-09-01	1.98548e-05	0.000233676	0	0	5.73723	62.1174	-1.79321	Reactome_2016	Combo_vs_Ctrl	9
Viral Messenger RNA Synthesis Homo sapiens R-HSA-168325	1942-09-01	1.98548e-05	0.000231892	0	0	5.73723	62.1174	-1.79321	Reactome_2016	Combo_vs_Ctrl	9
Regulation of TP53 Activity through Phosphorylation Homo sapiens R-HSA-6804756	15/89	9.73427e-07	1.67342e-05	0	0	4.51243	62.4631	-1.79562	Reactome_2016	Combo_vs_Ctrl	15
SIRT1 negatively regulates rRNA Expression Homo sapiens R-HSA-427359	1935-08-01	3.50445e-05	0.000385742	0	0	6.11972	62.7815	-1.79783	Reactome_2016	Combo_vs_Ctrl	8
Centrosome maturation Homo sapiens R-HSA-380287	14/79	1.19259e-06	2.00512e-05	0	0	4.74472	64.715	-1.81101	Reactome_2016	Combo_vs_Ctrl	14
Recruitment of mitotic centrosome proteins and complexes Homo sapiens R-HSA-380270	14/79	1.19259e-06	1.98332e-05	0	0	4.74472	64.715	-1.81101	Reactome_2016	Combo_vs_Ctrl	14
ATP-dependent DNA helicase activity (GO:0004003)	2020-07-28	5.8733e-05	0.0029392	0	0	6.69344	65.2109	-1.81432	GO_Molecular_Function_2018	Combo_vs_Ctrl	7
MTOR UP.V1 UP	24/170	2.17527e-08	3.42605e-07	0	0	3.77983	66.6895	-1.82406	MSigDB_Oncogenic_Signatures	Combo_vs_Ctrl	24
cyclin-dependent protein serine/threonine kinase activity (GO:0004693)	1933-08-01	2.20861e-05	0.00141228	0	0	6.49061	69.583	-1.8425	GO_Molecular_Function_2018	Combo_vs_Ctrl	8
DNA polymerase binding (GO:0070182)	2020-05-16	0.000222189	0.00752174	0	0	8.3668	70.3814	-1.84746	GO_Molecular_Function_2018	Combo_vs_Ctrl	5
GCNP SHH UP EARLY.V1 UP	25/174	7.71053e-09	1.32481e-07	0	0	3.8468	71.8609	-1.85649	MSigDB_Oncogenic_Signatures	Combo_vs_Ctrl	25
Nonhomologous End-Joining (NHEJ) Homo sapiens R-HSA-5693571	1952-11-01	2.73269e-06	4.13962e-05	0	0	5.66368	72.553	-1.86066	Reactome_2016	Combo_vs_Ctrl	11
SUMOylation of RNA binding proteins Homo sapiens R-HSA-4570464	1945-10-01	4.84757e-06	6.62213e-05	0	0	5.94972	72.807	-1.86217	Reactome_2016	Combo_vs_Ctrl	10
Transport of Mature mRNAs Derived from Intronless Transcripts Homo sapiens R-HSA-159234	1938-09-01	8.29749e-06	0.000105793	0	0	6.34115	74.1887	-1.87034	Reactome_2016	Combo_vs_Ctrl	9
rRNA modification in the nucleus Homo sapiens R-HSA-6790901	1958-12-01	1.24021e-06	2.04035e-05	0	0	5.5394	75.3371	-1.87701	Reactome_2016	Combo_vs_Ctrl	12
Kinesins Homo sapiens R-HSA-983189	1944-10-01	3.89984e-06	5.42432e-05	0	0	6.08495	75.7854	-1.87959	Reactome_2016	Combo_vs_Ctrl	10
Transport of Mature mRNA Derived from an Intronless Transcript Homo sapiens R-HSA-159231	1937-09-01	6.54783e-06	8.48999e-05	0	0	6.51254	77.7361	-1.89062	Reactome_2016	Combo_vs_Ctrl	9
FK506 binding (GO:0005528)	2020-05-15	0.000157584	0.00585094	0	0	8.92459	78.1397	-1.89287	GO_Molecular_Function_2018	Combo_vs_Ctrl	5
Regulation of PLK1 Activity at G2/M Transition Homo sapiens R-HSA-2565942	16/87	1.21788e-07	2.48448e-06	0	0	4.92391	78.3935	-1.89428	Reactome_2016	Combo_vs_Ctrl	16
G0 and Early G1 Homo sapiens R-HSA-1538133	2020-07-25	2.62937e-05	0.000297996	0	0	7.49665	79.0611	-1.89796	Reactome_2016	Combo_vs_Ctrl	7
HOXA9 DN.V1 DN	28/195	9.91981e-10	1.87484e-08	0	0	3.84444	79.7003	-1.90146	MSigDB_Oncogenic_Signatures	Combo_vs_Ctrl	28
snoRNA binding (GO:0030515)	2020-08-30	1.02821e-05	0.000845338	0	0	7.13967	81.9998	-1.91381	GO_Molecular_Function_2018	Combo_vs_Ctrl	8
Gene Silencing by RNA Homo sapiens R-HSA-211000	18/101	3.32736e-08	7.37807e-07	0	0	4.77156	82.1591	-1.91466	Reactome_2016	Combo_vs_Ctrl	18
tRNA Aminoacylation Homo sapiens R-HSA-379724	1942-10-01	2.47437e-06	3.82403e-05	0	0	6.37471	82.2944	-1.91537	Reactome_2016	Combo_vs_Ctrl	10
Nucleotide Metabolism WP87	2020-06-19	4.75616e-05	0.00104636	0	0	8.45487	84.1554	-1.92508	WikiPathways_2019_Mouse	Combo_vs_Ctrl	6
Pyrimidine metabolism Homo sapiens R-HSA-73848	2020-07-24	1.95594e-05	0.000231983	0	0	7.80901	84.6658	-1.92771	Reactome_2016	Combo_vs_Ctrl	7
Interactions of Vpr with host cellular proteins Homo sapiens R-HSA-176033	1935-09-01	3.97378e-06	5.47737e-05	0	0	6.88468	85.6165	-1.93256	Reactome_2016	Combo_vs_Ctrl	9
Host Interactions with Influenza Factors Homo sapiens R-HSA-168253	1941-10-01	1.95005e-06	3.07585e-05	0	0	6.53019	85.8566	-1.93377	Reactome_2016	Combo_vs_Ctrl	10
One Carbon Metabolism WP435	2020-08-29	7.79413e-06	0.000228628	0	0	7.38587	86.8736	-1.93889	WikiPathways_2019_Mouse	Combo_vs_Ctrl	8
PRC2 methylates histones and DNA Homo sapiens R-HSA-212300	1940-10-01	1.52513e-06	2.4824e-05	0	0	6.69344	89.6481	-1.95254	Reactome_2016	Combo_vs_Ctrl	10
cyclin-dependent protein kinase activity (GO:0097472)	1934-09-01	3.05254e-06	0.000390385	0	0	7.08717	90.0038	-1.95426	GO_Molecular_Function_2018	Combo_vs_Ctrl	9
Transport of the SLBP Dependant Mature mRNA Homo sapiens R-HSA-159230	1934-09-01	3.05254e-06	4.49075e-05	0	0	7.08717	90.0038	-1.95426	Reactome_2016	Combo_vs_Ctrl	9
Cyclins and Cell Cycle Regulation Homo sapiens h cellcyclePathway	2020-07-23	1.43143e-05	0.000848123	0	0	8.14854	90.8908	-1.95852	BioCarta_2016	Combo_vs_Ctrl	7
Gap-filling DNA repair synthesis and ligation in GG-NER Homo sapiens R-HSA-5696397	2020-07-23	1.43143e-05	0.000171101	0	0	8.14854	90.8908	-1.95852	Reactome_2016	Combo_vs_Ctrl	7
tRNA processing Homo sapiens R-HSA-72306	19/103	7.67185e-09	1.95632e-07	0	0	4.93885	92.2859	-1.96514	Reactome_2016	Combo_vs_Ctrl	19
single-stranded DNA binding (GO:0003697)	17/87	1.91366e-08	1.10131e-05	0	0	5.23165	92.9752	-1.96837	GO_Molecular_Function_2018	Combo_vs_Ctrl	17
DNA-dependent ATPase activity (GO:0008094)	15/72	5.31443e-08	2.03897e-05	0	0	5.57787	93.4307	-1.97049	GO_Molecular_Function_2018	Combo_vs_Ctrl	15
AURKA Activation by TPX2 Homo sapiens R-HSA-8854518	15/72	5.31443e-08	1.12932e-06	0	0	5.57787	93.4307	-1.97049	Reactome_2016	Combo_vs_Ctrl	15
NS1 Mediated Effects on Host Pathways Homo sapiens R-HSA-168276	1939-10-01	1.1832e-06	2.01144e-05	0	0	6.86507	93.6895	-1.97169	Reactome_2016	Combo_vs_Ctrl	10
Transport of the SLBP independent Mature mRNA Homo sapiens R-HSA-159227	1933-09-01	2.32102e-06	3.62363e-05	0	0	7.30194	94.7317	-1.9765	Reactome_2016	Combo_vs_Ctrl	9
3'-5' DNA helicase activity (GO:0043138)	2020-05-13	7.18798e-05	0.00295477	0	0	10.2976	98.2444	-1.99231	GO_Molecular_Function_2018	Combo_vs_Ctrl	5
Vpr-mediated nuclear import of PICs Homo sapiens R-HSA-180910	1932-09-01	1.74557e-06	2.81129e-05	0	0	7.53012	99.8376	-1.99929	Reactome_2016	Combo_vs_Ctrl	9
DNA methylation Homo sapiens R-HSA-5334118	1932-09-01	1.74557e-06	2.78201e-05	0	0	7.53012	99.8376	-1.99929	Reactome_2016	Combo_vs_Ctrl	9
HDR through Single Strand Annealing (SSA) Homo sapiens R-HSA-5685938	1937-10-01	6.93675e-07	1.2341e-05	0	0	7.23615	102.618	-2.01122	Reactome_2016	Combo_vs_Ctrl	10
Resolution of D-loop Structures through Synthesis-Dependent Strand Annealing (SDSA) Homo sapiens R-HSA-5693554	2020-08-26	3.13355e-06	4.56603e-05	0	0	8.23808	104.404	-2.01872	Reactome_2016	Combo_vs_Ctrl	8
Mitotic G2-G2/M phases Homo sapiens R-HSA-453274	29/175	1.43551e-11	6.27522e-10	0	0	4.43679	110.773	-2.04443	Reactome_2016	Combo_vs_Ctrl	29
DNA Damage/Telomere Stress Induced Senescence Homo sapiens R-HSA-2559586	14/59	2.54511e-08	5.7265e-07	0	0	6.3531	111.093	-2.04569	Reactome_2016	Combo_vs_Ctrl	14
four-way junction DNA binding (GO:0000400)	2020-06-16	1.54541e-05	0.00111173	0	0	10.0402	111.221	-2.04619	GO_Molecular_Function_2018	Combo_vs_Ctrl	6
Regulation of Glucokinase by Glucokinase Regulatory Protein Homo sapiens R-HSA-170822	2020-09-30	9.52175e-07	1.67451e-05	0	0	8.03213	111.362	-2.04674	Reactome_2016	Combo_vs_Ctrl	9
Transport of Ribonucleoproteins into the Host Nucleus Homo sapiens R-HSA-168271	2020-09-30	9.52175e-07	1.65549e-05	0	0	8.03213	111.362	-2.04674	Reactome_2016	Combo_vs_Ctrl	9
protein-arginine N-methyltransferase activity (GO:0016274)	2020-05-12	4.5636e-05	0.00262635	0	0	11.1557	111.499	-2.04727	GO_Molecular_Function_2018	Combo_vs_Ctrl	5
single-stranded DNA-dependent ATPase activity (GO:0043142)	2020-05-12	4.5636e-05	0.00250129	0	0	11.1557	111.499	-2.04727	GO_Molecular_Function_2018	Combo_vs_Ctrl	5
Purine ribonucleoside monophosphate biosynthesis Homo sapiens R-HSA-73817	2020-05-12	4.5636e-05	0.000491712	0	0	11.1557	111.499	-2.04727	Reactome_2016	Combo_vs_Ctrl	5
Base Excision Repair Homo sapiens R-HSA-73884	1935-10-01	3.91197e-07	7.29916e-06	0	0	7.64965	112.863	-2.05255	Reactome_2016	Combo_vs_Ctrl	10
Resolution of Abasic Sites (AP sites) Homo sapiens R-HSA-73933	1935-10-01	3.91197e-07	7.21122e-06	0	0	7.64965	112.863	-2.05255	Reactome_2016	Combo_vs_Ctrl	10
G2/M Transition Homo sapiens R-HSA-69275	29/173	1.07118e-11	5.12157e-10	0	0	4.48809	113.368	-2.05449	Reactome_2016	Combo_vs_Ctrl	29
DNA helicase activity (GO:0003678)	1940-11-01	1.57406e-07	4.52935e-05	0	0	7.36278	115.334	-2.06196	GO_Molecular_Function_2018	Combo_vs_Ctrl	11
tRNA processing in the nucleus Homo sapiens R-HSA-6784531	14/57	1.57824e-08	3.71493e-07	0	0	6.57601	118.134	-2.07237	Reactome_2016	Combo_vs_Ctrl	14
DNA secondary structure binding (GO:0000217)	2020-08-24	1.5764e-06	0.000259205	0	0	8.92459	119.236	-2.07641	GO_Molecular_Function_2018	Combo_vs_Ctrl	8
SUMO E3 ligases SUMOylate target proteins Homo sapiens R-HSA-3108232	20/96	3.24304e-10	9.9237e-09	0	0	5.57787	121.873	-2.08591	Reactome_2016	Combo_vs_Ctrl	20
Metabolism of non-coding RNA Homo sapiens R-HSA-194441	13/50	2.45363e-08	5.68795e-07	0	0	6.96118	121.982	-2.08629	Reactome_2016	Combo_vs_Ctrl	13
snRNP Assembly Homo sapiens R-HSA-191859	13/50	2.45363e-08	5.60306e-07	0	0	6.96118	121.982	-2.08629	Reactome_2016	Combo_vs_Ctrl	13
Estrogen-responsive protein Efp controls cell cycle and breast tumors growth Homo sapiens h EfpPathway	2020-06-15	9.9737e-06	0.000787922	0	0	10.7095	123.326	-2.09105	BioCarta_2016	Combo_vs_Ctrl	6
Mismatch Repair Homo sapiens R-HSA-5358508	2020-06-15	9.9737e-06	0.000122078	0	0	10.7095	123.326	-2.09105	Reactome_2016	Combo_vs_Ctrl	6
DNA replication Homo sapiens P00017	2020-07-19	3.35305e-06	0.000187771	0	0	9.86402	124.342	-2.09462	Panther_2016	Combo_vs_Ctrl	7
Resolution of D-Loop Structures Homo sapiens R-HSA-5693537	1933-10-01	2.11068e-07	4.14019e-06	0	0	8.11326	124.71	-2.0959	Reactome_2016	Combo_vs_Ctrl	10
SUMOylation Homo sapiens R-HSA-2990846	21/101	1.2181e-10	4.33418e-09	0	0	5.56682	127.082	-2.10409	Reactome_2016	Combo_vs_Ctrl	21
SeMet incorporation into proteins Homo sapiens R-HSA-2408517	2020-05-11	2.74657e-05	0.000304511	0	0	12.1699	127.815	-2.10658	Reactome_2016	Combo_vs_Ctrl	5
Resolution of D-loop Structures through Holliday Junction Intermediates Homo sapiens R-HSA-5693568	1932-10-01	1.52179e-07	3.0636e-06	0	0	8.3668	131.344	-2.11841	Reactome_2016	Combo_vs_Ctrl	10
Transcriptional regulation by small RNAs Homo sapiens R-HSA-5578749	17/72	8.85847e-10	2.55726e-08	0	0	6.32158	131.77	-2.11982	Reactome_2016	Combo_vs_Ctrl	17
Meiosis Homo sapiens R-HSA-1500620	19/85	2.49836e-10	7.80101e-09	0	0	5.98472	132.324	-2.12164	Reactome_2016	Combo_vs_Ctrl	19
G2/M DNA damage checkpoint Homo sapiens R-HSA-69473	18/78	4.23998e-10	1.272e-08	0	0	6.17856	133.341	-2.12496	Reactome_2016	Combo_vs_Ctrl	18
Mismatch repair (MMR) directed by MSH2:MSH3 (MutSbeta) Homo sapiens R-HSA-5358606	2020-06-14	6.17946e-06	8.22137e-05	0	0	11.4745	137.628	-2.13871	Reactome_2016	Combo_vs_Ctrl	6
Mismatch repair (MMR) directed by MSH2:MSH6 (MutSalpha) Homo sapiens R-HSA-5358565	2020-06-14	6.17946e-06	8.1505e-05	0	0	11.4745	137.628	-2.13871	Reactome_2016	Combo_vs_Ctrl	6
Removal of the Flap Intermediate Homo sapiens R-HSA-69166	2020-06-14	6.17946e-06	8.08083e-05	0	0	11.4745	137.628	-2.13871	Reactome_2016	Combo_vs_Ctrl	6
DNA Replication Pre-Initiation Homo sapiens R-HSA-69002	19/82	1.28602e-10	4.37248e-09	0	0	6.20368	141.284	-2.15009	Reactome_2016	Combo_vs_Ctrl	19
M/G1 Transition Homo sapiens R-HSA-68874	19/82	1.28602e-10	4.27742e-09	0	0	6.20368	141.284	-2.15009	Reactome_2016	Combo_vs_Ctrl	19
De novo purine biosynthesis Homo sapiens P02738	2020-09-26	2.37842e-07	2.66384e-05	0	0	9.26784	141.35	-2.1503	Panther_2016	Combo_vs_Ctrl	9
PRC2 EZH2 UP.V1 UP	34/195	5.37106e-14	1.26891e-12	0	0	4.66825	142.639	-2.15424	MSigDB_Oncogenic_Signatures	Combo_vs_Ctrl	34
Nuclear Envelope Breakdown Homo sapiens R-HSA-2980766	14/51	3.26419e-09	8.61071e-08	0	0	7.34966	143.614	-2.1572	Reactome_2016	Combo_vs_Ctrl	14
Metabolism of nucleotides Homo sapiens R-HSA-15869	20/87	4.88961e-11	1.96871e-09	0	0	6.15489	146.125	-2.16473	Reactome_2016	Combo_vs_Ctrl	20
arginine N-methyltransferase activity (GO:0016273)	2020-05-10	1.54571e-05	0.00104654	0	0	13.3869	148.292	-2.17112	GO_Molecular_Function_2018	Combo_vs_Ctrl	5
De novo pyrimidine deoxyribonucleotide biosynthesis Homo sapiens P02739	2020-05-10	1.54571e-05	0.000577066	0	0	13.3869	148.292	-2.17112	Panther_2016	Combo_vs_Ctrl	5
Presynaptic phase of homologous DNA pairing and strand exchange Homo sapiens R-HSA-5693616	1939-12-01	1.04359e-08	2.5753e-07	0	0	8.23808	151.4	-2.18012	Reactome_2016	Combo_vs_Ctrl	12
DNA Repair Homo sapiens R-HSA-73894	45/285	2.08839e-16	1.45238e-14	0	0	4.22744	152.631	-2.18364	Reactome_2016	Combo_vs_Ctrl	45
Homologous recombination WP1258	2020-06-13	3.6464e-06	0.000160442	0	0	12.3571	154.733	-2.18958	WikiPathways_2019_Mouse	Combo_vs_Ctrl	6
Activation of DNA fragmentation factor Homo sapiens R-HSA-211227	2020-06-13	3.6464e-06	5.26321e-05	0	0	12.3571	154.733	-2.18958	Reactome_2016	Combo_vs_Ctrl	6
Apoptosis induced DNA fragmentation Homo sapiens R-HSA-140342	2020-06-13	3.6464e-06	5.21402e-05	0	0	12.3571	154.733	-2.18958	Reactome_2016	Combo_vs_Ctrl	6
PRC2 EDD UP.V1 UP	35/193	6.61177e-15	1.78518e-13	0	0	4.85535	158.527	-2.2001	MSigDB_Oncogenic_Signatures	Combo_vs_Ctrl	35
Cytosolic tRNA aminoacylation Homo sapiens R-HSA-379716	2020-09-24	1.06449e-07	2.20091e-06	0	0	10.0402	161.201	-2.20737	Reactome_2016	Combo_vs_Ctrl	9
Homologous DNA Pairing and Strand Exchange Homo sapiens R-HSA-5693579	13/42	2.32568e-09	6.35408e-08	0	0	8.28712	164.742	-2.2168	Reactome_2016	Combo_vs_Ctrl	13
Processing of DNA double-strand break ends Homo sapiens R-HSA-5693607	20/81	1.19328e-11	5.36978e-10	0	0	6.61081	166.273	-2.22082	Reactome_2016	Combo_vs_Ctrl	20
Nuclear import of Rev protein Homo sapiens R-HSA-180746	1932-11-01	1.15447e-08	2.80371e-07	0	0	9.20348	168.212	-2.22586	Reactome_2016	Combo_vs_Ctrl	11
CORDENONSI YAP CONSERVED SIGNATURE	16/57	1.69365e-10	3.55665e-09	0	0	7.51544	169.09	-2.22812	MSigDB_Oncogenic_Signatures	Combo_vs_Ctrl	16
PCNA-Dependent Long Patch Base Excision Repair Homo sapiens R-HSA-5651801	2020-08-19	1.91283e-07	3.80081e-06	0	0	11.2732	174.39	-2.24152	Reactome_2016	Combo_vs_Ctrl	8
histone kinase activity (GO:0035173)	2020-05-09	7.97424e-06	0.000706027	0	0	14.8743	174.614	-2.24208	GO_Molecular_Function_2018	Combo_vs_Ctrl	5
Mismatch repair WP1257	2020-05-09	7.97424e-06	0.000200495	0	0	14.8743	174.614	-2.24208	WikiPathways_2019_Mouse	Combo_vs_Ctrl	5
DNA replication origin binding (GO:0003688)	2020-06-12	2.02759e-06	0.00029172	0	0	13.3869	175.484	-2.24424	GO_Molecular_Function_2018	Combo_vs_Ctrl	6
Export of Viral Ribonucleoproteins from Nucleus Homo sapiens R-HSA-168274	1931-11-01	7.83965e-09	1.96634e-07	0	0	9.50037	177.316	-2.24875	Reactome_2016	Combo_vs_Ctrl	11
Processive synthesis on the lagging strand Homo sapiens R-HSA-69183	2020-07-15	4.88164e-07	8.78696e-06	0	0	12.4944	181.577	-2.25906	Reactome_2016	Combo_vs_Ctrl	7
Meiotic recombination Homo sapiens R-HSA-912446	16/54	6.85151e-11	2.6879e-09	0	0	7.93297	185.663	-2.26873	Reactome_2016	Combo_vs_Ctrl	16
Resolution of AP sites via the multiple-nucleotide patch replacement pathway Homo sapiens R-HSA-110373	2020-09-22	4.33151e-08	9.33411e-07	0	0	10.9529	185.704	-2.26882	Reactome_2016	Combo_vs_Ctrl	9
Mitotic Prophase Homo sapiens R-HSA-68875	25/107	1.25605e-13	6.86339e-12	0	0	6.25555	185.825	-2.2691	Reactome_2016	Combo_vs_Ctrl	25
NEP/NS2 Interacts with the Cellular Export Machinery Homo sapiens R-HSA-168333	2020-11-30	5.23375e-09	1.35723e-07	0	0	9.81705	187.193	-2.27229	Reactome_2016	Combo_vs_Ctrl	11
HDR through Homologous Recombination (HRR) Homo sapiens R-HSA-5685942	18/64	1.17355e-11	5.44099e-10	0	0	7.53012	189.521	-2.27766	Reactome_2016	Combo_vs_Ctrl	18
Nuclear Pore Complex (NPC) Disassembly Homo sapiens R-HSA-3301854	1934-12-01	1.73771e-09	4.92352e-08	0	0	9.44956	190.604	-2.28013	Reactome_2016	Combo_vs_Ctrl	12
Synthesis of DNA Homo sapiens R-HSA-69239	24/97	9.95713e-14	5.64237e-12	0	0	6.62444	198.322	-2.29737	Reactome_2016	Combo_vs_Ctrl	24
Polymerase switching on the C-strand of the telomere Homo sapiens R-HSA-174411	2020-07-14	2.69035e-07	5.21042e-06	0	0	13.3869	202.522	-2.30647	Reactome_2016	Combo_vs_Ctrl	7
Polymerase switching Homo sapiens R-HSA-69091	2020-07-14	2.69035e-07	5.14529e-06	0	0	13.3869	202.522	-2.30647	Reactome_2016	Combo_vs_Ctrl	7
Leading Strand Synthesis Homo sapiens R-HSA-69109	2020-07-14	2.69035e-07	5.08177e-06	0	0	13.3869	202.522	-2.30647	Reactome_2016	Combo_vs_Ctrl	7
G1/S-Specific Transcription Homo sapiens R-HSA-69205	2020-08-17	6.57575e-08	1.3782e-06	0	0	12.5994	208.36	-2.31881	Reactome_2016	Combo_vs_Ctrl	8
Condensation of Prophase Chromosomes Homo sapiens R-HSA-2299718	14/41	1.25881e-10	4.37722e-09	0	0	9.14226	208.404	-2.31891	Reactome_2016	Combo_vs_Ctrl	14
Lagging Strand Synthesis Homo sapiens R-HSA-69186	2020-09-20	1.56443e-08	3.73998e-07	0	0	12.0482	216.544	-2.33555	Reactome_2016	Combo_vs_Ctrl	9
SUMOylation of DNA replication proteins Homo sapiens R-HSA-4615885	15/44	2.80007e-11	1.15787e-09	0	0	9.12742	221.785	-2.34593	Reactome_2016	Combo_vs_Ctrl	15
Interactions of Rev with host cellular proteins Homo sapiens R-HSA-177243	13/35	1.71373e-10	5.46252e-09	0	0	9.94454	223.625	-2.34952	Reactome_2016	Combo_vs_Ctrl	13
E2F1 UP.V1 UP	39/189	1.73937e-18	5.479e-17	0	0	5.52474	225.923	-2.35396	MSigDB_Oncogenic_Signatures	Combo_vs_Ctrl	39
Signaling by Rho GTPases Homo sapiens R-HSA-194315	61/367	4.9488e-23	6.88334e-21	0	0	4.45013	228.56	-2.359	Reactome_2016	Combo_vs_Ctrl	61
Polo-like kinase mediated events Homo sapiens R-HSA-156711	2020-08-16	3.59914e-08	7.86668e-07	0	0	13.3869	229.451	-2.36069	Reactome_2016	Combo_vs_Ctrl	8
HDR through Homologous Recombination (HR) or Single Strand Annealing (SSA) Homo sapiens R-HSA-5693567	28/112	6.45333e-16	4.114e-14	0	0	6.69344	234.115	-2.36943	Reactome_2016	Combo_vs_Ctrl	28
Homology Directed Repair Homo sapiens R-HSA-5693538	29/118	3.19721e-16	2.12684e-14	0	0	6.57999	234.768	-2.37064	Reactome_2016	Combo_vs_Ctrl	29
Mitotic Spindle	41/199	2.4144e-19	2.4144e-18	0	0	5.5162	236.467	-2.37377	MSigDB_Hallmark_2020	Combo_vs_Ctrl	41
DNA Replication Homo sapiens R-HSA-69306	27/105	9.93661e-16	6.0812e-14	0	0	6.88468	237.832	-2.37627	Reactome_2016	Combo_vs_Ctrl	27
Telomere C-strand (Lagging Strand) Synthesis Homo sapiens R-HSA-174417	2020-10-22	2.14176e-09	5.95798e-08	0	0	12.1699	242.931	-2.38548	Reactome_2016	Combo_vs_Ctrl	10
Rev-mediated nuclear export of HIV RNA Homo sapiens R-HSA-165054	13/33	7.12979e-11	2.72714e-09	0	0	10.5472	246.427	-2.39169	Reactome_2016	Combo_vs_Ctrl	13
E2F mediated regulation of DNA replication Homo sapiens R-HSA-113510	13/33	7.12979e-11	2.66063e-09	0	0	10.5472	246.427	-2.39169	Reactome_2016	Combo_vs_Ctrl	13
G2/M Checkpoints Homo sapiens R-HSA-69481	35/150	1.59808e-18	1.35837e-16	0	0	6.24721	255.997	-2.40823	Reactome_2016	Combo_vs_Ctrl	35
S Phase Homo sapiens R-HSA-69242	31/124	1.76887e-17	1.28875e-15	0	0	6.69344	258.19	-2.41194	Reactome_2016	Combo_vs_Ctrl	31
Deposition of new CENPA-containing nucleosomes at the centromere Homo sapiens R-HSA-606279	18/52	2.1182e-13	1.11754e-11	0	0	9.26784	270.464	-2.43211	Reactome_2016	Combo_vs_Ctrl	18
Nucleosome assembly Homo sapiens R-HSA-774815	18/52	2.1182e-13	1.08028e-11	0	0	9.26784	270.464	-2.43211	Reactome_2016	Combo_vs_Ctrl	18
DNA Double-Strand Break Repair Homo sapiens R-HSA-5693532	35/145	4.94733e-19	5.04627e-17	0	0	6.46263	272.402	-2.43521	Reactome_2016	Combo_vs_Ctrl	35
Cell Cycle Checkpoints Homo sapiens R-HSA-69620	41/182	7.20566e-21	7.87475e-19	0	0	6.03145	279.735	-2.44675	Reactome_2016	Combo_vs_Ctrl	41
VEGF A UP.V1 DN	43/193	1.25807e-21	4.7555e-20	0	0	5.96514	287.071	-2.45799	MSigDB_Oncogenic_Signatures	Combo_vs_Ctrl	43
Telomere Maintenance Homo sapiens R-HSA-157579	20/59	1.54055e-14	9.06553e-13	0	0	9.07585	288.649	-2.46037	Reactome_2016	Combo_vs_Ctrl	20
Role of Ran in mitotic spindle regulation Homo sapiens h ranMSpathway	2020-07-11	2.85461e-08	3.38271e-06	0	0	17.0378	295.977	-2.47126	BioCarta_2016	Combo_vs_Ctrl	7
G1/S Transition Homo sapiens R-HSA-69206	31/112	7.07409e-19	6.7646e-17	0	0	7.41059	309.709	-2.49095	Reactome_2016	Combo_vs_Ctrl	31
Cyclin A/B1 associated events during G2/M transition Homo sapiens R-HSA-69273	2020-11-22	8.8869e-11	3.23737e-09	0	0	13.3869	309.824	-2.49112	Reactome_2016	Combo_vs_Ctrl	11
Extension of Telomeres Homo sapiens R-HSA-180786	13/28	5.53717e-12	2.73286e-10	0	0	12.4307	322.197	-2.50812	Reactome_2016	Combo_vs_Ctrl	13
Phosphorylation of Emi1 Homo sapiens R-HSA-176417	2020-05-06	4.17166e-07	7.59838e-06	0	0	22.3115	327.751	-2.51554	Reactome_2016	Combo_vs_Ctrl	5
Mitotic G1-G1/S phases Homo sapiens R-HSA-453279	36/136	5.40896e-21	6.36593e-19	0	0	7.08717	330.732	-2.51948	Reactome_2016	Combo_vs_Ctrl	36
CDK Regulation of DNA Replication Homo sapiens h mcmPathway	2020-10-18	1.66042e-10	3.93521e-08	0	0	14.8743	334.951	-2.52498	BioCarta_2016	Combo_vs_Ctrl	10
RHO GTPase Effectors Homo sapiens R-HSA-195258	55/255	1.3312e-26	2.90963e-24	0	0	5.77473	344.065	-2.53664	Reactome_2016	Combo_vs_Ctrl	55
Mitotic Anaphase Homo sapiens R-HSA-68882	43/173	1.2115e-23	1.85359e-21	0	0	6.65475	351.155	-2.5455	Reactome_2016	Combo_vs_Ctrl	43
GCNP SHH UP LATE.V1 UP	45/183	1.77257e-24	1.11672e-22	0	0	6.58371	360.061	-2.55638	MSigDB_Oncogenic_Signatures	Combo_vs_Ctrl	45
Separation of Sister Chromatids Homo sapiens R-HSA-2467813	42/162	6.72866e-24	1.14387e-21	0	0	6.94135	370.36	-2.56862	Reactome_2016	Combo_vs_Ctrl	42
Mitotic Metaphase and Anaphase Homo sapiens R-HSA-2555396	44/174	1.69611e-24	3.24381e-22	0	0	6.77038	370.568	-2.56887	Reactome_2016	Combo_vs_Ctrl	44
RB P107 DN.V1 UP	39/140	1.57007e-23	7.41857e-22	0	0	7.45841	391.628	-2.59287	MSigDB_Oncogenic_Signatures	Combo_vs_Ctrl	39
G1 to S cell cycle control WP413	23/61	1.02464e-17	9.01682e-16	0	0	10.095	394.913	-2.5965	WikiPathways_2019_Mouse	Combo_vs_Ctrl	23
CSR LATE UP.V1 UP	45/172	1.05602e-25	9.97942e-24	0	0	7.00476	402.845	-2.60514	MSigDB_Oncogenic_Signatures	Combo_vs_Ctrl	45
Condensation of Prometaphase Chromosomes Homo sapiens R-HSA-2514853	2020-08-11	5.45101e-10	1.60385e-08	0	0	19.4718	415.335	-2.6184	Reactome_2016	Combo_vs_Ctrl	8
Myc Targets V1	51/200	2.0969e-28	3.49484e-27	0	0	6.82731	435.118	-2.63861	MSigDB_Hallmark_2020	Combo_vs_Ctrl	51
Unwinding of DNA Homo sapiens R-HSA-176974	2020-09-12	2.68335e-11	1.14042e-09	0	0	20.0803	488.783	-2.68912	Reactome_2016	Combo_vs_Ctrl	9
Chromosome Maintenance Homo sapiens R-HSA-73886	31/86	9.93929e-23	1.26726e-20	0	0	9.65101	488.949	-2.68926	Reactome_2016	Combo_vs_Ctrl	31
Pyrimidine biosynthesis Homo sapiens R-HSA-500753	2020-06-06	2.66224e-09	7.146e-08	0	0	26.7738	528.624	-2.72315	Reactome_2016	Combo_vs_Ctrl	6
Activation of ATR in response to replication stress Homo sapiens R-HSA-176187	19/37	5.6065e-18	4.28897e-16	0	0	13.7487	546.134	-2.7373	Reactome_2016	Combo_vs_Ctrl	19
M Phase Homo sapiens R-HSA-68886	68/268	1.95024e-37	7.45967e-35	0	0	6.79334	574.226	-2.75908	Reactome_2016	Combo_vs_Ctrl	68
DNA strand elongation Homo sapiens R-HSA-69190	18/32	4.72283e-18	3.80312e-16	0	0	15.0602	600.815	-2.77874	Reactome_2016	Combo_vs_Ctrl	18
RPS14 DN.V1 DN	55/187	4.30222e-34	8.1312e-32	0	0	7.87464	604.999	-2.78175	MSigDB_Oncogenic_Signatures	Combo_vs_Ctrl	55
RHO GTPases Activate Formins Homo sapiens R-HSA-5663220	41/114	1.29032e-29	3.29032e-27	0	0	9.62916	640.532	-2.80654	Reactome_2016	Combo_vs_Ctrl	41
Activation of the pre-replicative complex Homo sapiens R-HSA-68962	18/30	9.29536e-19	8.36582e-17	0	0	16.0643	666.982	-2.82411	Reactome_2016	Combo_vs_Ctrl	18
DNA Replication WP150	22/41	3.6012e-21	6.33812e-19	0	0	14.3664	676.27	-2.83012	WikiPathways_2019_Mouse	Combo_vs_Ctrl	22
Myc Targets V2	28/58	6.48044e-25	8.10055e-24	0	0	12.9253	719.883	-2.85726	MSigDB_Hallmark_2020	Combo_vs_Ctrl	28
Resolution of Sister Chromatid Cohesion Homo sapiens R-HSA-2500257	42/99	7.73162e-34	2.36587e-31	0	0	11.3586	866.006	-2.93752	Reactome_2016	Combo_vs_Ctrl	42
Mitotic Prometaphase Homo sapiens R-HSA-68877	47/107	1.32341e-38	6.74942e-36	0	0	11.7604	1025.72	-3.01103	Reactome_2016	Combo_vs_Ctrl	47
Cell Cycle, Mitotic Homo sapiens R-HSA-69278	126/462	9.32538e-74	7.13391e-71	0	0	7.30194	1227.88	-3.08916	Reactome_2016	Combo_vs_Ctrl	126
Cell Cycle Homo sapiens R-HSA-1640170	146/566	2.95573e-82	4.52226e-79	0	0	6.90631	1296.51	-3.11278	Reactome_2016	Combo_vs_Ctrl	146
G2-M Checkpoint	82/200	6.55121e-64	1.6378e-62	0	0	10.9772	1597.03	-3.20331	MSigDB_Hallmark_2020	Combo_vs_Ctrl	82
E2F Targets	102/200	7.65462e-92	3.82731e-90	0	0	13.6546	2864.77	-3.45709	MSigDB_Hallmark_2020	Combo_vs_Ctrl	102

## Sheet: Tumor_Combo_vs_ctrl
Term	Overlap	P.value	Adjusted.P.value	Old.P.value	Old.Adjusted.P.value	Odds.Ratio	Combined.Score	NES	pathway	comparison	overlap_n
Interferon Gamma Response	50/200	1.345242e-60	6.726210e-59	0	0	29.585799	4078.65478	3.610517	MSigDB_Hallmark_2020	Combo_vs_Ctrl	50
Interferon Alpha Response	28/97	9.783131e-36	2.445783e-34	0	0	34.160922	2753.79406	3.439931	MSigDB_Hallmark_2020	Combo_vs_Ctrl	28
Interferon alpha/beta signaling Homo sapiens R-HSA-909733	19/68	3.387010e-24	2.591063e-21	0	0	33.066481	1786.98190	3.252120	Reactome_2016	Combo_vs_Ctrl	19
Interferon Signaling Homo sapiens R-HSA-913531	28/196	1.775053e-26	2.715831e-23	0	0	16.906171	1002.42404	3.001051	Reactome_2016	Combo_vs_Ctrl	28
Type II interferon signaling (IFNG) WP1253	9/34	7.754320e-12	1.364760e-09	0	0	31.326140	801.40947	2.903854	WikiPathways_2019_Mouse	Combo_vs_Ctrl	9
Interferon gamma signaling Homo sapiens R-HSA-877300	14/93	4.563063e-14	1.745372e-11	0	0	17.815105	547.24790	2.738184	Reactome_2016	Combo_vs_Ctrl	14
Regulation of IFNA signaling Homo sapiens R-HSA-912694	5/25	1.881009e-06	4.796573e-04	0	0	23.668639	312.04029	2.494211	Reactome_2016	Combo_vs_Ctrl	5
Cytokine Signaling in Immune system Homo sapiens R-HSA-1280215	34/620	2.237197e-18	1.140970e-15	0	0	6.489788	263.75348	2.421198	Reactome_2016	Combo_vs_Ctrl	34
IL-6/JAK/STAT3 Signaling	9/87	5.173319e-08	8.622198e-07	0	0	12.242400	205.39277	2.312585	MSigDB_Hallmark_2020	Combo_vs_Ctrl	9
ISG15 antiviral mechanism Homo sapiens R-HSA-1169408	7/72	2.521107e-06	5.510420e-04	0	0	11.505588	148.31638	2.171189	Reactome_2016	Combo_vs_Ctrl	7
Antiviral mechanism by IFN-stimulated genes Homo sapiens R-HSA-1169410	7/72	2.521107e-06	4.821617e-04	0	0	11.505588	148.31638	2.171189	Reactome_2016	Combo_vs_Ctrl	7
TNF-alpha Signaling via NF-kB	12/200	1.386151e-07	1.732689e-06	0	0	7.100592	112.12945	2.049720	MSigDB_Hallmark_2020	Combo_vs_Ctrl	12
Allograft Rejection	11/200	1.107653e-06	1.107653e-05	0	0	6.508876	89.25795	1.950647	MSigDB_Hallmark_2020	Combo_vs_Ctrl	11
RIG-I/MDA5 mediated induction of IFN-alpha/beta pathways Homo sapiens R-HSA-168928	6/79	5.559211e-05	9.450658e-03	0	0	8.988091	88.06054	1.944781	Reactome_2016	Combo_vs_Ctrl	6
Immune System Homo sapiens R-HSA-168256	42/1547	7.488447e-12	2.291465e-09	0	0	3.212937	82.30794	1.915442	Reactome_2016	Combo_vs_Ctrl	42
Adipogenesis genes WP447	8/134	1.859251e-05	1.636141e-03	0	0	7.065265	76.96018	1.886266	WikiPathways_2019_Mouse	Combo_vs_Ctrl	8
Apoptosis WP1254	5/81	6.196807e-04	3.635460e-02	0	0	7.305136	53.95797	1.732056	WikiPathways_2019_Mouse	Combo_vs_Ctrl	5
Inflammatory Response	9/200	5.258326e-05	4.381938e-04	0	0	5.325444	52.47220	1.719929	MSigDB_Hallmark_2020	Combo_vs_Ctrl	9
Apoptosis	7/161	4.452997e-04	3.180712e-03	0	0	5.145356	39.70550	1.598851	MSigDB_Hallmark_2020	Combo_vs_Ctrl	7
IL-2/STAT5 Signaling	6/199	6.984681e-03	4.365426e-02	0	0	3.568137	17.71236	1.248276	MSigDB_Hallmark_2020	Combo_vs_Ctrl	6
Hypoxia	5/200	6.458767e-03	4.036729e-02	0	0	4.273504	21.54836	-1.333414	MSigDB_Hallmark_2020	Combo_vs_Ctrl	5
KRAS Signaling Up	5/200	6.458767e-03	3.588204e-02	0	0	4.273504	21.54836	-1.333414	MSigDB_Hallmark_2020	Combo_vs_Ctrl	5
Metabolism Homo sapiens R-HSA-1430728	26/1908	3.358016e-05	7.339664e-03	0	0	2.329373	23.99622	-1.380143	Reactome_2016	Combo_vs_Ctrl	26
Focal Adhesion-PI3K-Akt-mTOR-signaling pathway WP2841	8/324	6.431009e-04	2.263715e-02	0	0	4.220745	31.01914	-1.491630	WikiPathways_2019_Mouse	Combo_vs_Ctrl	8
Fatty Acid Metabolism	5/158	2.377896e-03	1.981580e-02	0	0	5.409499	32.68170	-1.514305	MSigDB_Hallmark_2020	Combo_vs_Ctrl	5
Apical Junction	6/200	1.156706e-03	1.445883e-02	0	0	5.128205	34.67784	-1.540052	MSigDB_Hallmark_2020	Combo_vs_Ctrl	6
Glycolysis	6/200	1.156706e-03	1.156706e-02	0	0	5.128205	34.67784	-1.540052	MSigDB_Hallmark_2020	Combo_vs_Ctrl	6
Extracellular matrix organization Homo sapiens R-HSA-1474244	8/283	2.621396e-04	3.646124e-02	0	0	4.832231	39.84964	-1.600424	Reactome_2016	Combo_vs_Ctrl	8
Axon guidance Homo sapiens R-HSA-422475	13/515	1.014527e-05	3.104453e-03	0	0	4.314995	49.61598	-1.695622	Reactome_2016	Combo_vs_Ctrl	13
Metabolism of lipids and lipoproteins Homo sapiens R-HSA-556833	17/659	2.881989e-07	1.102361e-04	0	0	4.409686	66.40817	-1.822222	Reactome_2016	Combo_vs_Ctrl	17
Angiogenesis Homo sapiens P00005	7/142	2.028577e-05	1.136003e-03	0	0	8.426628	91.05470	-1.959302	Panther_2016	Combo_vs_Ctrl	7
mTORC1 Signaling	9/200	2.718457e-06	4.530762e-05	0	0	7.692308	98.58035	-1.993790	MSigDB_Hallmark_2020	Combo_vs_Ctrl	9
EPH-Ephrin signaling Homo sapiens R-HSA-2682334	6/95	2.003775e-05	5.109626e-03	0	0	10.796221	116.79236	-2.067414	Reactome_2016	Combo_vs_Ctrl	6
Epithelial Mesenchymal Transition	10/200	2.814201e-07	7.035504e-06	0	0	8.547009	128.91809	-2.110314	MSigDB_Hallmark_2020	Combo_vs_Ctrl	10
Regulation of cholesterol biosynthesis by SREBP (SREBF) Homo sapiens R-HSA-1655829	8/55	1.042087e-09	5.314642e-07	0	0	24.864025	514.23877	-2.711165	Reactome_2016	Combo_vs_Ctrl	8
Activation of gene expression by SREBF (SREBP) Homo sapiens R-HSA-2426168	8/42	1.075954e-10	8.231046e-08	0	0	32.560033	747.33882	-2.873518	Reactome_2016	Combo_vs_Ctrl	8
Cholesterol Homeostasis	13/74	3.676204e-16	1.838102e-14	0	0	30.030030	1067.25167	-3.028267	MSigDB_Hallmark_2020	Combo_vs_Ctrl	13
Cholesterol metabolism (includes both Bloch and Kandutsch-Russell pathways) WP4346	13/49	1.041050e-18	1.832247e-16	0	0	45.351474	1877.83684	-3.273658	WikiPathways_2019_Mouse	Combo_vs_Ctrl	13
Cholesterol biosynthesis Homo sapiens P00014	6/11	1.587983e-11	1.778541e-09	0	0	93.240093	2318.50550	-3.365208	Panther_2016	Combo_vs_Ctrl	6
Cholesterol biosynthesis Homo sapiens R-HSA-191273	10/23	3.399367e-17	5.201032e-14	0	0	74.321813	2818.30972	-3.449989	Reactome_2016	Combo_vs_Ctrl	10
Cholesterol Biosynthesis WP103	9/15	2.848392e-17	2.506585e-15	0	0	102.564103	3907.40432	-3.591888	WikiPathways_2019_Mouse	Combo_vs_Ctrl	9

## Sheet: fibs_all_pathways_combo_vs_ctr
Term	Overlap	P.value	Adjusted.P.value	Old.P.value	Old.Adjusted.P.value	Odds.Ratio	Combined.Score	NES	pathway	comparison	overlap_n
Interferon Gamma Response	90/200	1.71746e-98	8.58729e-97	0	0	21.4797	4835.35	3.68443	MSigDB_Hallmark_2020	Combo_vs_Ctrl	90
Interferon Alpha Response	52/97	8.59392e-62	2.14848e-60	0	0	25.5887	3598	3.55606	MSigDB_Hallmark_2020	Combo_vs_Ctrl	52
Type II interferon signaling (IFNG) WP1253	16/34	1.61693e-18	2.8458e-16	0	0	22.4624	920.197	2.96388	WikiPathways_2019_Mouse	Combo_vs_Ctrl	16
Interferon alpha/beta signaling Homo sapiens R-HSA-909733	23/68	4.51203e-22	2.30114e-19	0	0	16.1449	793.523	2.89956	Reactome_2016	Combo_vs_Ctrl	23
Interferon Signaling Homo sapiens R-HSA-913531	38/196	7.8668e-26	1.20362e-22	0	0	9.2543	534.941	2.72831	Reactome_2016	Combo_vs_Ctrl	38
Antigen Processing and Presentation Homo sapiens h mhcPathway	2020-06-12	6.77515e-08	1.60571e-05	0	0	23.8663	393.972	2.59547	BioCarta_2016	Combo_vs_Ctrl	6
Interferon gamma signaling Homo sapiens R-HSA-877300	21/93	3.1283e-16	9.57261e-14	0	0	10.7784	384.797	2.58523	Reactome_2016	Combo_vs_Ctrl	21
TNF-alpha Signaling via NF-kB	34/200	2.75271e-21	4.58785e-20	0	0	8.11456	384.157	2.58451	MSigDB_Hallmark_2020	Combo_vs_Ctrl	34
chemokine receptor binding (GO:0042379)	13/49	1.64873e-11	1.89769e-08	0	0	12.6638	314.422	2.49751	GO_Molecular_Function_2018	Combo_vs_Ctrl	13
chemokine activity (GO:0008009)	1946-12-01	1.24941e-10	7.19036e-08	0	0	12.452	283.945	2.45323	GO_Molecular_Function_2018	Combo_vs_Ctrl	12
Cytokine Signaling in Immune system Homo sapiens R-HSA-1280215	62/620	6.12521e-25	4.68578e-22	0	0	4.77327	266.12	2.42508	Reactome_2016	Combo_vs_Ctrl	62
Allograft Rejection	29/200	2.13969e-16	2.67461e-15	0	0	6.92124	249.723	2.39746	MSigDB_Hallmark_2020	Combo_vs_Ctrl	29
Inflammatory Response	28/200	1.80094e-15	1.80094e-14	0	0	6.68258	226.877	2.35579	MSigDB_Hallmark_2020	Combo_vs_Ctrl	28
IL-6/JAK/STAT3 Signaling	16/87	3.1524e-11	2.627e-10	0	0	8.77843	212.265	2.32688	MSigDB_Hallmark_2020	Combo_vs_Ctrl	16
Chemokine receptors bind chemokines Homo sapiens R-HSA-380108	1956-12-01	1.48395e-09	3.78408e-07	0	0	10.2284	207.929	2.31792	Reactome_2016	Combo_vs_Ctrl	12
LTE2 UP.V1 DN	26/196	6.896e-14	1.30334e-11	0	0	6.33189	191.889	2.28305	MSigDB_Oncogenic_Signatures	Combo_vs_Ctrl	26
CXCR chemokine receptor binding (GO:0045236)	2020-05-17	1.98056e-05	0.00455925	0	0	14.039	152.036	2.18195	GO_Molecular_Function_2018	Combo_vs_Ctrl	5
HINATA NFKB IMMU INF	2020-05-17	1.98056e-05	0.000534751	0	0	14.039	152.036	2.18195	MSigDB_Oncogenic_Signatures	Combo_vs_Ctrl	5
Immune System Homo sapiens R-HSA-168256	93/1547	6.37967e-21	2.44023e-18	0	0	2.86952	133.436	2.12527	Reactome_2016	Combo_vs_Ctrl	93
RIG-I/MDA5 mediated induction of IFN-alpha/beta pathways Homo sapiens R-HSA-168928	1979-12-01	8.81325e-08	1.68553e-05	0	0	7.25054	117.781	2.07107	Reactome_2016	Combo_vs_Ctrl	12
EGFR UP.V1 UP	21/193	7.79168e-10	7.36314e-08	0	0	5.19371	108.927	2.03713	MSigDB_Oncogenic_Signatures	Combo_vs_Ctrl	21
CCR chemokine receptor binding (GO:0048020)	1938-07-01	1.21306e-05	0.00349059	0	0	8.79287	99.5333	1.99797	GO_Molecular_Function_2018	Combo_vs_Ctrl	7
MEK UP.V1 DN	20/196	6.07306e-09	3.82602e-07	0	0	4.87068	92.1504	1.9645	MSigDB_Oncogenic_Signatures	Combo_vs_Ctrl	20
Antigen processing-Cross presentation Homo sapiens R-HSA-1236975	1982-11-01	1.10274e-06	0.00016872	0	0	6.40317	87.8368	1.94368	Reactome_2016	Combo_vs_Ctrl	11
Lung fibrosis WP3632	1961-09-01	4.71908e-06	0.000276853	0	0	7.04253	86.3688	1.93636	WikiPathways_2019_Mouse	Combo_vs_Ctrl	9
Apoptosis	17/161	5.09419e-08	3.6387e-07	0	0	5.0401	84.6363	1.92756	MSigDB_Hallmark_2020	Combo_vs_Ctrl	17
transferase activity, transferring pentosyl groups (GO:0016763)	1942-07-01	2.41266e-05	0.00462829	0	0	7.95545	84.5839	1.92729	GO_Molecular_Function_2018	Combo_vs_Ctrl	7
Antigen Presentation: Folding, assembly and peptide loading of class I MHC Homo sapiens R-HSA-983170	2020-05-25	0.000148102	0.00809273	0	0	9.54654	84.1776	1.9252	Reactome_2016	Combo_vs_Ctrl	5
Regulation of IFNA signaling Homo sapiens R-HSA-912694	2020-05-25	0.000148102	0.00781367	0	0	9.54654	84.1776	1.9252	Reactome_2016	Combo_vs_Ctrl	5
Negative regulators of RIG-I/MDA5 signaling Homo sapiens R-HSA-936440	1934-06-01	6.67224e-05	0.00567141	0	0	8.42342	80.9909	1.90844	Reactome_2016	Combo_vs_Ctrl	6
ER-Phagosome pathway Homo sapiens R-HSA-1236974	1965-09-01	8.07943e-06	0.000882967	0	0	6.60914	77.5001	1.8893	Reactome_2016	Combo_vs_Ctrl	9
cytokine activity (GO:0005125)	16/155	1.72832e-07	6.631e-05	0	0	4.92725	76.7219	1.88492	GO_Molecular_Function_2018	Combo_vs_Ctrl	16
Chemokine signaling pathway WP2292	18/190	1.10091e-07	9.68799e-06	0	0	4.52204	72.452	1.86005	WikiPathways_2019_Mouse	Combo_vs_Ctrl	18
Complement	18/200	2.38908e-07	1.49318e-06	0	0	4.29594	65.501	1.81625	MSigDB_Hallmark_2020	Combo_vs_Ctrl	18
Toll-Like Receptors Cascades Homo sapiens R-HSA-168898	14/140	1.49635e-06	0.000208129	0	0	4.77327	64.0214	1.80633	Reactome_2016	Combo_vs_Ctrl	14
Activated TLR4 signalling Homo sapiens R-HSA-166054	12/112	4.08157e-06	0.000480369	0	0	5.11422	63.4625	1.80252	Reactome_2016	Combo_vs_Ctrl	12
NOD1/2 Signaling Pathway Homo sapiens R-HSA-168638	2020-05-31	0.000427157	0.0167577	0	0	7.69882	59.7302	1.77619	Reactome_2016	Combo_vs_Ctrl	5
TRAF6 mediated IRF7 activation Homo sapiens R-HSA-933541	1932-05-01	0.000497635	0.0185703	0	0	7.45823	56.7247	1.75377	Reactome_2016	Combo_vs_Ctrl	5
Adipogenesis genes WP447	13/134	4.96061e-06	0.000218267	0	0	4.63078	56.5603	1.75251	WikiPathways_2019_Mouse	Combo_vs_Ctrl	13
IL-2/STAT5 Signaling	17/199	1.07385e-06	5.96585e-06	0	0	4.07767	56.0445	1.74853	MSigDB_Hallmark_2020	Combo_vs_Ctrl	17
Toll Like Receptor 4 (TLR4) Cascade Homo sapiens R-HSA-166016	12/122	9.93863e-06	0.00101374	0	0	4.69502	54.0823	1.73306	Reactome_2016	Combo_vs_Ctrl	12
Interleukin-1 signaling Homo sapiens R-HSA-446652	1944-06-01	0.000293528	0.0128314	0	0	6.509	52.9412	1.72379	Reactome_2016	Combo_vs_Ctrl	6
Apoptosis WP1254	1981-09-01	4.90958e-05	0.00172817	0	0	5.30363	52.6213	1.72116	WikiPathways_2019_Mouse	Combo_vs_Ctrl	9
Class I MHC mediated antigen processing & presentation Homo sapiens R-HSA-983169	22/305	5.42119e-07	9.21602e-05	0	0	3.44301	49.6751	1.69614	Reactome_2016	Combo_vs_Ctrl	22
MyD88 dependent cascade initiated on endosome Homo sapiens R-HSA-975155	1985-09-01	7.19851e-05	0.00579669	0	0	5.05405	48.2108	1.68314	Reactome_2016	Combo_vs_Ctrl	9
Toll Like Receptor 7/8 (TLR7/8) Cascade Homo sapiens R-HSA-168181	1985-09-01	7.19851e-05	0.00550686	0	0	5.05405	48.2108	1.68314	Reactome_2016	Combo_vs_Ctrl	9
STK33 SKM UP	21/290	9.22349e-07	4.3581e-05	0	0	3.45651	48.0328	1.68154	MSigDB_Oncogenic_Signatures	Combo_vs_Ctrl	21
kinase inhibitor activity (GO:0019210)	1959-07-01	0.000224731	0.0323332	0	0	5.6632	47.5743	1.67737	GO_Molecular_Function_2018	Combo_vs_Ctrl	7
ISG15 antiviral mechanism Homo sapiens R-HSA-1169408	1972-08-01	0.000128714	0.00895147	0	0	5.30363	47.5095	1.67678	Reactome_2016	Combo_vs_Ctrl	8
Antiviral mechanism by IFN-stimulated genes Homo sapiens R-HSA-1169410	1972-08-01	0.000128714	0.00856228	0	0	5.30363	47.5095	1.67678	Reactome_2016	Combo_vs_Ctrl	8
Nucleotide-binding domain, leucine rich repeat containing receptor (NLR) signaling pathways Homo sapiens R-HSA-168643	1947-06-01	0.000423511	0.0170519	0	0	6.09354	47.3281	1.67512	Reactome_2016	Combo_vs_Ctrl	6
STK33 UP	21/293	1.08931e-06	4.11758e-05	0	0	3.42111	46.9718	1.67184	MSigDB_Oncogenic_Signatures	Combo_vs_Ctrl	21
STK33 NOMO UP	21/294	1.15082e-06	3.62508e-05	0	0	3.40948	46.6247	1.66862	MSigDB_Oncogenic_Signatures	Combo_vs_Ctrl	21
Toll Like Receptor 9 (TLR9) Cascade Homo sapiens R-HSA-168138	1988-09-01	9.45312e-05	0.00688727	0	0	4.88175	45.2372	1.6555	Reactome_2016	Combo_vs_Ctrl	9
Innate Immune System Homo sapiens R-HSA-168249	43/807	2.12284e-08	4.63992e-06	0	0	2.54338	44.9362	1.6526	Reactome_2016	Combo_vs_Ctrl	43
Glutathione conjugation Homo sapiens R-HSA-156590	1938-05-01	0.00111908	0.0349428	0	0	6.28062	42.6783	1.63021	Reactome_2016	Combo_vs_Ctrl	5
Ubiquitin-dependent degradation of Cyclin D1 Homo sapiens R-HSA-69229	1950-06-01	0.000594543	0.0216584	0	0	5.72792	42.5454	1.62885	Reactome_2016	Combo_vs_Ctrl	6
Ubiquitin-dependent degradation of Cyclin D Homo sapiens R-HSA-75815	1950-06-01	0.000594543	0.0211547	0	0	5.72792	42.5454	1.62885	Reactome_2016	Combo_vs_Ctrl	6
Regulation of ornithine decarboxylase (ODC) Homo sapiens R-HSA-350562	1950-06-01	0.000594543	0.0206739	0	0	5.72792	42.5454	1.62885	Reactome_2016	Combo_vs_Ctrl	6
MyD88:Mal cascade initiated on plasma membrane Homo sapiens R-HSA-166058	1992-09-01	0.000133552	0.00851397	0	0	4.6695	41.6567	1.61968	Reactome_2016	Combo_vs_Ctrl	9
Toll Like Receptor TLR1:TLR2 Cascade Homo sapiens R-HSA-168179	1992-09-01	0.000133552	0.00817341	0	0	4.6695	41.6567	1.61968	Reactome_2016	Combo_vs_Ctrl	9
Toll Like Receptor TLR6:TLR2 Cascade Homo sapiens R-HSA-168188	1992-09-01	0.000133552	0.00785905	0	0	4.6695	41.6567	1.61968	Reactome_2016	Combo_vs_Ctrl	9
Toll Like Receptor 2 (TLR2) Cascade Homo sapiens R-HSA-181438	1992-09-01	0.000133552	0.00756797	0	0	4.6695	41.6567	1.61968	Reactome_2016	Combo_vs_Ctrl	9
Proteasome Degradation WP519	1952-06-01	0.000735399	0.0215717	0	0	5.50762	39.738	1.59921	WikiPathways_2019_Mouse	Combo_vs_Ctrl	6
Cytosolic sensors of pathogen-associated DNA Homo sapiens R-HSA-1834949	1966-07-01	0.000452553	0.0173102	0	0	5.06256	38.9848	1.59089	Reactome_2016	Combo_vs_Ctrl	7
MyD88-independent TLR3/TLR4 cascade Homo sapiens R-HSA-166166	1997-09-01	0.000200433	0.00958321	0	0	4.42881	37.7114	1.57647	Reactome_2016	Combo_vs_Ctrl	9
Toll Like Receptor 3 (TLR3) Cascade Homo sapiens R-HSA-168164	1997-09-01	0.000200433	0.00929281	0	0	4.42881	37.7114	1.57647	Reactome_2016	Combo_vs_Ctrl	9
TRIF-mediated TLR3/TLR4 signaling Homo sapiens R-HSA-937061	1997-09-01	0.000200433	0.00901949	0	0	4.42881	37.7114	1.57647	Reactome_2016	Combo_vs_Ctrl	9
AUF1 (hnRNP D0) binds and destabilizes mRNA Homo sapiens R-HSA-450408	1954-06-01	0.000900747	0.0299596	0	0	5.30363	37.1906	1.57043	Reactome_2016	Combo_vs_Ctrl	6
MEL18 DN.V1 DN	12/148	6.85545e-05	0.00143964	0	0	3.87022	37.1072	1.56946	MSigDB_Oncogenic_Signatures	Combo_vs_Ctrl	12
Signaling by Interleukins Homo sapiens R-HSA-449147	24/392	3.07767e-06	0.000392402	0	0	2.92241	37.0893	1.56925	Reactome_2016	Combo_vs_Ctrl	24
TRAF6 mediated induction of NFkB and MAP kinases upon TLR7/8 or 9 activation Homo sapiens R-HSA-975138	1983-08-01	0.000347341	0.014762	0	0	4.60074	36.6458	1.56402	Reactome_2016	Combo_vs_Ctrl	8
PKCA DN.V1 DN	13/167	5.26268e-05	0.00124331	0	0	3.71572	36.6083	1.56358	MSigDB_Oncogenic_Signatures	Combo_vs_Ctrl	13
CAHOY ASTROGLIAL	9/100	0.000252499	0.00397686	0	0	4.29594	35.588	1.5513	MSigDB_Oncogenic_Signatures	Combo_vs_Ctrl	9
Degradation of DVL Homo sapiens R-HSA-4641258	1956-06-01	0.00109332	0.0348497	0	0	5.11422	34.8715	1.54247	Reactome_2016	Combo_vs_Ctrl	6
Peptide ligand-binding receptors Homo sapiens R-HSA-375276	14/193	5.93622e-05	0.0053426	0	0	3.46248	33.6963	1.52758	Reactome_2016	Combo_vs_Ctrl	14
SCF(Skp2)-mediated degradation of p27/p21 Homo sapiens R-HSA-187577	1959-06-01	0.00143953	0.0423553	0	0	4.85417	31.763	1.50192	Reactome_2016	Combo_vs_Ctrl	6
protein kinase regulator activity (GO:0019887)	9/107	0.000418638	0.0438047	0	0	4.0149	31.2299	1.49457	GO_Molecular_Function_2018	Combo_vs_Ctrl	9
RB DN.V1 DN	10/126	0.000325021	0.00409526	0	0	3.78831	30.4263	1.48325	MSigDB_Oncogenic_Signatures	Combo_vs_Ctrl	10
IL-2 Signaling Pathway WP450	1976-07-01	0.00106251	0.0233753	0	0	4.39643	30.1029	1.47861	WikiPathways_2019_Mouse	Combo_vs_Ctrl	7
CSR LATE UP.V1 DN	12/170	0.000254579	0.00370119	0	0	3.36937	27.8845	1.44536	MSigDB_Oncogenic_Signatures	Combo_vs_Ctrl	12
RPS14 DN.V1 UP	13/192	0.000214979	0.0040631	0	0	3.2319	27.2933	1.43606	MSigDB_Oncogenic_Signatures	Combo_vs_Ctrl	13
HOXA9 DN.V1 UP	13/194	0.000237956	0.00408852	0	0	3.19858	26.6871	1.4263	MSigDB_Oncogenic_Signatures	Combo_vs_Ctrl	13
Spinal Cord Injury WP2432	1999-08-01	0.00112849	0.0220682	0	0	3.85719	26.1783	1.41794	WikiPathways_2019_Mouse	Combo_vs_Ctrl	8
RAF UP.V1 UP	13/196	0.000263004	0.00355056	0	0	3.16594	26.098	1.41661	MSigDB_Oncogenic_Signatures	Combo_vs_Ctrl	13
Toll Like Receptor 10 (TLR10) Cascade Homo sapiens R-HSA-168142	1982-07-01	0.00166032	0.0470424	0	0	4.07474	26.0814	1.41633	Reactome_2016	Combo_vs_Ctrl	7
Toll Like Receptor 5 (TLR5) Cascade Homo sapiens R-HSA-168176	1982-07-01	0.00166032	0.0461871	0	0	4.07474	26.0814	1.41633	Reactome_2016	Combo_vs_Ctrl	7
MyD88 cascade initiated on plasma membrane Homo sapiens R-HSA-975871	1982-07-01	0.00166032	0.0453623	0	0	4.07474	26.0814	1.41633	Reactome_2016	Combo_vs_Ctrl	7
SNF5 DN.V1 UP	12/177	0.000368388	0.00435158	0	0	3.23612	25.5859	1.408	MSigDB_Oncogenic_Signatures	Combo_vs_Ctrl	12
ESC J1 UP EARLY.V1 DN	12/179	0.000407885	0.00453473	0	0	3.19996	24.9741	1.39749	MSigDB_Oncogenic_Signatures	Combo_vs_Ctrl	12
p53 Pathway	13/200	0.000319918	0.00159959	0	0	3.10263	24.9682	1.39739	MSigDB_Hallmark_2020	Combo_vs_Ctrl	13
RB P130 DN.V1 DN	10/139	0.000707077	0.00703356	0	0	3.43401	24.9116	1.3964	MSigDB_Oncogenic_Signatures	Combo_vs_Ctrl	10
ALK DN.V1 UP	10/145	0.000979752	0.00841696	0	0	3.29191	22.807	1.35807	MSigDB_Oncogenic_Signatures	Combo_vs_Ctrl	10
ATF2 UP.V1 DN	12/187	0.00060358	0.00633759	0	0	3.06306	22.7053	1.35613	MSigDB_Oncogenic_Signatures	Combo_vs_Ctrl	12
Adaptive Immune System Homo sapiens R-HSA-1280218	34/762	3.07503e-05	0.0029405	0	0	2.12981	22.1278	1.34494	Reactome_2016	Combo_vs_Ctrl	34
WNT UP.V1 DN	11/170	0.000942051	0.00847846	0	0	3.08859	21.5196	1.33283	MSigDB_Oncogenic_Signatures	Combo_vs_Ctrl	11
Antigen processing: Ubiquitination & Proteasome degradation Homo sapiens R-HSA-983168	15/260	0.000411821	0.0170294	0	0	2.75381	21.4657	1.33175	Reactome_2016	Combo_vs_Ctrl	15
E2F1 UP.V1 DN	12/193	0.000797486	0.00753624	0	0	2.96784	21.1727	1.32578	MSigDB_Oncogenic_Signatures	Combo_vs_Ctrl	12
SIRNA EIF4GI UP	1995-07-01	0.00383073	0.0233551	0	0	3.51715	19.5719	1.29163	MSigDB_Oncogenic_Signatures	Combo_vs_Ctrl	7
UV Response Up	10/158	0.00186996	0.00849984	0	0	3.02106	18.9778	1.27825	MSigDB_Hallmark_2020	Combo_vs_Ctrl	10
MAPK signaling pathway WP493	10/159	0.00195918	0.0344816	0	0	3.00206	18.7185	1.27227	WikiPathways_2019_Mouse	Combo_vs_Ctrl	10
AKT UP MTOR DN.V1 UP	11/184	0.0017815	0.0146393	0	0	2.85359	18.064	1.25682	MSigDB_Oncogenic_Signatures	Combo_vs_Ctrl	11
BMI1 DN MEL18 DN.V1 UP	9/145	0.00353991	0.0223015	0	0	2.96272	16.7206	1.22325	MSigDB_Oncogenic_Signatures	Combo_vs_Ctrl	9
IL15 UP.V1 UP	11/192	0.0024864	0.0195804	0	0	2.73469	16.3997	1.21484	MSigDB_Oncogenic_Signatures	Combo_vs_Ctrl	11
BMI1 DN MEL18 DN.V1 DN	9/147	0.00387529	0.0228884	0	0	2.92241	16.2285	1.21028	MSigDB_Oncogenic_Signatures	Combo_vs_Ctrl	9
MTOR UP.V1 UP	10/170	0.00318646	0.0231631	0	0	2.80781	16.1416	1.20795	MSigDB_Oncogenic_Signatures	Combo_vs_Ctrl	10
PKCA DN.V1 UP	10/170	0.00318646	0.0223052	0	0	2.80781	16.1416	1.20795	MSigDB_Oncogenic_Signatures	Combo_vs_Ctrl	10
AKT UP.V1 UP	10/172	0.00346413	0.0233829	0	0	2.77516	15.7221	1.19651	MSigDB_Oncogenic_Signatures	Combo_vs_Ctrl	10
ESC V6.5 UP EARLY.V1 DN	10/172	0.00346413	0.0225766	0	0	2.77516	15.7221	1.19651	MSigDB_Oncogenic_Signatures	Combo_vs_Ctrl	10
VEGF A UP.V1 UP	11/196	0.0029152	0.0220389	0	0	2.67888	15.6388	1.1942	MSigDB_Oncogenic_Signatures	Combo_vs_Ctrl	11
Class A/1 (Rhodopsin-like receptors) Homo sapiens R-HSA-373076	16/323	0.00137522	0.0412565	0	0	2.36447	15.5798	1.19256	Reactome_2016	Combo_vs_Ctrl	16
Xenobiotic Metabolism	11/200	0.00340165	0.0141736	0	0	2.6253	14.9209	1.17379	MSigDB_Hallmark_2020	Combo_vs_Ctrl	11
MTOR UP.V1 DN	10/184	0.00555816	0.0318331	0	0	2.59417	13.4702	1.12937	MSigDB_Oncogenic_Signatures	Combo_vs_Ctrl	10
ESC V6.5 UP LATE.V1 DN	10/186	0.00598709	0.0332812	0	0	2.56627	13.1346	1.11842	MSigDB_Oncogenic_Signatures	Combo_vs_Ctrl	10
AKT UP.V1 DN	10/187	0.00621102	0.0335395	0	0	2.55255	12.9706	1.11296	MSigDB_Oncogenic_Signatures	Combo_vs_Ctrl	10
LEF1 UP.V1 DN	10/190	0.00692207	0.0363408	0	0	2.51225	12.4935	1.09668	MSigDB_Oncogenic_Signatures	Combo_vs_Ctrl	10
IL2 UP.V1 UP	10/192	0.00743007	0.0379536	0	0	2.48608	12.1873	1.08591	MSigDB_Oncogenic_Signatures	Combo_vs_Ctrl	10
KRAS.DF.V1 UP	10/193	0.00769464	0.0382707	0	0	2.4732	12.0376	1.08054	MSigDB_Oncogenic_Signatures	Combo_vs_Ctrl	10
UV Response Dn	8/144	0.0110581	0.0345564	0	0	2.65182	11.9454	1.0772	MSigDB_Hallmark_2020	Combo_vs_Ctrl	8
GCNP SHH UP EARLY.V1 DN	9/169	0.00944024	0.0457489	0	0	2.54198	11.8527	1.07382	MSigDB_Oncogenic_Signatures	Combo_vs_Ctrl	9
Estrogen Response Early	10/200	0.00975559	0.0375215	0	0	2.38663	11.0499	1.04336	MSigDB_Hallmark_2020	Combo_vs_Ctrl	10
Epithelial Mesenchymal Transition	10/200	0.00975559	0.0348414	0	0	2.38663	11.0499	1.04336	MSigDB_Hallmark_2020	Combo_vs_Ctrl	10
KRAS Signaling Up	10/200	0.00975559	0.0325186	0	0	2.38663	11.0499	1.04336	MSigDB_Hallmark_2020	Combo_vs_Ctrl	10
Estrogen Response Early	9/200	0.00346493	0.0346493	0	0	2.98013	16.8826	-1.22744	MSigDB_Hallmark_2020	Combo_vs_Ctrl	9
ESC J1 UP LATE.V1 UP	9/191	0.00255064	0.0301294	0	0	3.12056	18.6341	-1.27031	MSigDB_Oncogenic_Signatures	Combo_vs_Ctrl	9
CAHOY OLIGODENDROCUTIC	6/100	0.00410621	0.0456513	0	0	3.97351	21.8355	-1.33916	MSigDB_Oncogenic_Signatures	Combo_vs_Ctrl	6
SNF5 DN.V1 UP	9/177	0.00151868	0.0191354	0	0	3.36738	21.854	-1.33953	MSigDB_Oncogenic_Signatures	Combo_vs_Ctrl	9
TNF-alpha Signaling via NF-kB	10/200	0.000959745	0.0159958	0	0	3.31126	23.0094	-1.36191	MSigDB_Hallmark_2020	Combo_vs_Ctrl	10
Glycolysis	10/200	0.000959745	0.0119968	0	0	3.31126	23.0094	-1.36191	MSigDB_Hallmark_2020	Combo_vs_Ctrl	10
PRC2 EZH2 UP.V1 DN	10/194	0.0007603	0.0110536	0	0	3.41367	24.5163	-1.38945	MSigDB_Oncogenic_Signatures	Combo_vs_Ctrl	10
RPS14 DN.V1 UP	10/192	0.00070196	0.0120609	0	0	3.44923	25.047	-1.39876	MSigDB_Oncogenic_Signatures	Combo_vs_Ctrl	10
IL2 UP.V1 UP	10/192	0.00070196	0.0110559	0	0	3.44923	25.047	-1.39876	MSigDB_Oncogenic_Signatures	Combo_vs_Ctrl	10
MEK UP.V1 UP	11/196	0.000202379	0.00424995	0	0	3.71672	31.6121	-1.49985	MSigDB_Oncogenic_Signatures	Combo_vs_Ctrl	11
RAF UP.V1 UP	11/196	0.000202379	0.00382496	0	0	3.71672	31.6121	-1.49985	MSigDB_Oncogenic_Signatures	Combo_vs_Ctrl	11
TGFB UP.V1 UP	11/192	0.000169073	0.00399434	0	0	3.79415	32.9529	-1.51789	MSigDB_Oncogenic_Signatures	Combo_vs_Ctrl	11
CAHOY ASTROGLIAL	7/100	0.000806679	0.0108902	0	0	4.63576	33.0186	-1.51876	MSigDB_Oncogenic_Signatures	Combo_vs_Ctrl	7
CAMP UP.V1 DN	12/200	5.5291e-05	0.00209	0	0	3.97351	38.9519	-1.59053	MSigDB_Oncogenic_Signatures	Combo_vs_Ctrl	12
ESC V6.5 UP EARLY.V1 DN	11/172	6.35152e-05	0.00200073	0	0	4.23533	40.9312	-1.61205	MSigDB_Oncogenic_Signatures	Combo_vs_Ctrl	11
LEF1 UP.V1 UP	12/195	4.32402e-05	0.0020431	0	0	4.07539	40.9526	-1.61228	MSigDB_Oncogenic_Signatures	Combo_vs_Ctrl	12
RB DN.V1 DN	9/126	0.000127403	0.00343989	0	0	4.73037	42.4227	-1.6276	MSigDB_Oncogenic_Signatures	Combo_vs_Ctrl	9
BMI1 DN.V1 UP	11/147	1.487e-05	0.000936808	0	0	4.95562	55.0876	-1.74105	MSigDB_Oncogenic_Signatures	Combo_vs_Ctrl	11
BMI1 DN MEL18 DN.V1 UP	11/145	1.30642e-05	0.00123457	0	0	5.02398	56.4978	-1.75203	MSigDB_Oncogenic_Signatures	Combo_vs_Ctrl	11
Hypoxia	14/200	2.26411e-06	5.66028e-05	0	0	4.63576	60.2571	-1.78001	MSigDB_Hallmark_2020	Combo_vs_Ctrl	14
MEL18 DN.V1 UP	14/141	3.07425e-08	5.81033e-06	0	0	6.57555	113.741	-2.05592	MSigDB_Oncogenic_Signatures	Combo_vs_Ctrl	14
Extracellular matrix organization Homo sapiens R-HSA-1474244	23/283	6.34447e-11	9.70703e-08	0	0	5.38226	126.38	-2.10168	Reactome_2016	Combo_vs_Ctrl	23
Collagen formation Homo sapiens R-HSA-1474290	1985-11-01	6.1381e-08	3.13043e-05	0	0	8.57032	142.32	-2.15327	Reactome_2016	Combo_vs_Ctrl	11
Collagen biosynthesis and modifying enzymes Homo sapiens R-HSA-1650814	1963-10-01	3.34727e-08	2.56066e-05	0	0	10.5119	180.937	-2.25753	Reactome_2016	Combo_vs_Ctrl	10
Epithelial Mesenchymal Transition	26/200	4.44254e-17	2.22127e-15	0	0	8.60927	324.162	-2.51076	MSigDB_Hallmark_2020	Combo_vs_Ctrl	26
