# Supplementary material for: Combined PD-L1/TGFβ blockade allows expansion and differentiation of stem cell-like CD8 T cells in immune excluded tumors
Source: Nat Commun. 2023 Aug 5;14:4703. doi: 10.1038/s41467-023-40398-4 (PMC10404279; doi:10.1038/s41467-023-40398-4)
Supplement: Supplementary file 11 — Source Data [file 41467_2023_40398_MOESM11_ESM.xlsx]

## Sheet: Figure 1A
Day after inititation of treatment	Mouse ID	Treatment group	Tumor Volume	Observations
-1	18055	01 - Mu IgG1 anti-gp120	146
2	18055	01 - Mu IgG1 anti-gp120	299
5	18055	01 - Mu IgG1 anti-gp120	607
8	18055	01 - Mu IgG1 anti-gp120	1069
12	18055	01 - Mu IgG1 anti-gp120	1628
15	18055	01 - Mu IgG1 anti-gp120	2154	Mouse tumor volume is greater than 2000 mm3. Mouse euthanized.
-1	20021	01 - Mu IgG1 anti-gp120	183
2	20021	01 - Mu IgG1 anti-gp120	297
5	20021	01 - Mu IgG1 anti-gp120	373
8	20021	01 - Mu IgG1 anti-gp120	712
12	20021	01 - Mu IgG1 anti-gp120	1364
15	20021	01 - Mu IgG1 anti-gp120	1766
19	20021	01 - Mu IgG1 anti-gp120	2148	Mouse tumor volume is greater than 2000 mm3. Mouse euthanized.
-1	21832	01 - Mu IgG1 anti-gp120	154
2	21832	01 - Mu IgG1 anti-gp120	207
5	21832	01 - Mu IgG1 anti-gp120	435
8	21832	01 - Mu IgG1 anti-gp120	356
12	21832	01 - Mu IgG1 anti-gp120	510
15	21832	01 - Mu IgG1 anti-gp120	893
19	21832	01 - Mu IgG1 anti-gp120	1733
22	21832	01 - Mu IgG1 anti-gp120	2296	Mouse tumor volume is greater than 2000 mm3. Mouse euthanized.
-1	21880	01 - Mu IgG1 anti-gp120	193
2	21880	01 - Mu IgG1 anti-gp120	430
5	21880	01 - Mu IgG1 anti-gp120	738
8	21880	01 - Mu IgG1 anti-gp120	1055
12	21880	01 - Mu IgG1 anti-gp120	1939
-1	21986	01 - Mu IgG1 anti-gp120	140
2	21986	01 - Mu IgG1 anti-gp120	300
5	21986	01 - Mu IgG1 anti-gp120	537
8	21986	01 - Mu IgG1 anti-gp120	525
12	21986	01 - Mu IgG1 anti-gp120	409
15	21986	01 - Mu IgG1 anti-gp120	507
19	21986	01 - Mu IgG1 anti-gp120	779
22	21986	01 - Mu IgG1 anti-gp120	988
26	21986	01 - Mu IgG1 anti-gp120	1212
29	21986	01 - Mu IgG1 anti-gp120	2213	Mouse tumor volume is greater than 2000 mm3. Mouse euthanized.
-1	22125	01 - Mu IgG1 anti-gp120	164
2	22125	01 - Mu IgG1 anti-gp120	254
5	22125	01 - Mu IgG1 anti-gp120	171
8	22125	01 - Mu IgG1 anti-gp120	133
12	22125	01 - Mu IgG1 anti-gp120	201
15	22125	01 - Mu IgG1 anti-gp120	124
19	22125	01 - Mu IgG1 anti-gp120	200
22	22125	01 - Mu IgG1 anti-gp120	220
26	22125	01 - Mu IgG1 anti-gp120	792
29	22125	01 - Mu IgG1 anti-gp120	1807
33	22125	01 - Mu IgG1 anti-gp120	2527	Mouse tumor volume is greater than 2000 mm3. Mouse euthanized.
-1	22153	01 - Mu IgG1 anti-gp120	160
2	22153	01 - Mu IgG1 anti-gp120	288
5	22153	01 - Mu IgG1 anti-gp120	907
8	22153	01 - Mu IgG1 anti-gp120	1218
12	22153	01 - Mu IgG1 anti-gp120	2138	Mouse tumor volume is greater than 2000 mm3. Mouse euthanized.
-1	22384	01 - Mu IgG1 anti-gp120	173
2	22384	01 - Mu IgG1 anti-gp120	376
5	22384	01 - Mu IgG1 anti-gp120	539
8	22384	01 - Mu IgG1 anti-gp120	1044
12	22384	01 - Mu IgG1 anti-gp120	1527
15	22384	01 - Mu IgG1 anti-gp120	2146	Mouse tumor volume is greater than 2000 mm3. Mouse euthanized.
-1	22410	01 - Mu IgG1 anti-gp120	202
2	22410	01 - Mu IgG1 anti-gp120	369
5	22410	01 - Mu IgG1 anti-gp120	1334
8	22410	01 - Mu IgG1 anti-gp120	1511
12	22410	01 - Mu IgG1 anti-gp120	2566	Mouse tumor volume is greater than 2000 mm3. Mouse euthanized.
-1	22425	01 - Mu IgG1 anti-gp120	195
2	22425	01 - Mu IgG1 anti-gp120	440
5	22425	01 - Mu IgG1 anti-gp120	703
8	22425	01 - Mu IgG1 anti-gp120	1103
12	22425	01 - Mu IgG1 anti-gp120	2021	Mouse tumor volume is greater than 2000 mm3. Mouse euthanized.
-1	17575	02 - Mu IgG1 anti-PD-L1	140
2	17575	02 - Mu IgG1 anti-PD-L1	341
5	17575	02 - Mu IgG1 anti-PD-L1	461
8	17575	02 - Mu IgG1 anti-PD-L1	677
12	17575	02 - Mu IgG1 anti-PD-L1	997
15	17575	02 - Mu IgG1 anti-PD-L1	938
19	17575	02 - Mu IgG1 anti-PD-L1	1262
22	17575	02 - Mu IgG1 anti-PD-L1	1440
26	17575	02 - Mu IgG1 anti-PD-L1	1862
29	17575	02 - Mu IgG1 anti-PD-L1	2604	Mouse tumor volume is greater than 2000 mm3. Mouse euthanized.
-1	17868	02 - Mu IgG1 anti-PD-L1	149
2	17868	02 - Mu IgG1 anti-PD-L1	270
5	17868	02 - Mu IgG1 anti-PD-L1	479
8	17868	02 - Mu IgG1 anti-PD-L1	383
12	17868	02 - Mu IgG1 anti-PD-L1	588
15	17868	02 - Mu IgG1 anti-PD-L1	191
19	17868	02 - Mu IgG1 anti-PD-L1	136
22	17868	02 - Mu IgG1 anti-PD-L1	192
26	17868	02 - Mu IgG1 anti-PD-L1	0	CR
29	17868	02 - Mu IgG1 anti-PD-L1	0	CR
33	17868	02 - Mu IgG1 anti-PD-L1	0	CR
36	17868	02 - Mu IgG1 anti-PD-L1	0	CR
39	17868	02 - Mu IgG1 anti-PD-L1	0	CR
-1	18231	02 - Mu IgG1 anti-PD-L1	155
2	18231	02 - Mu IgG1 anti-PD-L1	412
5	18231	02 - Mu IgG1 anti-PD-L1	532
8	18231	02 - Mu IgG1 anti-PD-L1	432
12	18231	02 - Mu IgG1 anti-PD-L1	407
15	18231	02 - Mu IgG1 anti-PD-L1	282
19	18231	02 - Mu IgG1 anti-PD-L1	233
22	18231	02 - Mu IgG1 anti-PD-L1	139
26	18231	02 - Mu IgG1 anti-PD-L1	32	Tumor present but too small to be calipered accurately.
29	18231	02 - Mu IgG1 anti-PD-L1	0	CR.
33	18231	02 - Mu IgG1 anti-PD-L1	0	CR.
36	18231	02 - Mu IgG1 anti-PD-L1	0	CR.
39	18231	02 - Mu IgG1 anti-PD-L1	0	CR.
-1	19529	02 - Mu IgG1 anti-PD-L1	196
2	19529	02 - Mu IgG1 anti-PD-L1	398
5	19529	02 - Mu IgG1 anti-PD-L1	529	pin ulceration
8	19529	02 - Mu IgG1 anti-PD-L1	683	pin ulceration
12	19529	02 - Mu IgG1 anti-PD-L1	1421	pin ulceration Tumor ulcerated, but euthanasia criteria not met.
15	19529	02 - Mu IgG1 anti-PD-L1	1920	pin ulceration Tumor ulcerated, but euthanasia criteria not met. Euthanized due to ulcerated/necrotic tumor.
-1	19557	02 - Mu IgG1 anti-PD-L1	133
2	19557	02 - Mu IgG1 anti-PD-L1	244
5	19557	02 - Mu IgG1 anti-PD-L1	393
8	19557	02 - Mu IgG1 anti-PD-L1	355
12	19557	02 - Mu IgG1 anti-PD-L1	478
15	19557	02 - Mu IgG1 anti-PD-L1	531
19	19557	02 - Mu IgG1 anti-PD-L1	794
22	19557	02 - Mu IgG1 anti-PD-L1	1088
26	19557	02 - Mu IgG1 anti-PD-L1	1585
29	19557	02 - Mu IgG1 anti-PD-L1	2027	Mouse tumor volume is greater than 2000 mm3. Mouse euthanized.
-1	20791	02 - Mu IgG1 anti-PD-L1	194
2	20791	02 - Mu IgG1 anti-PD-L1	273
5	20791	02 - Mu IgG1 anti-PD-L1	283
8	20791	02 - Mu IgG1 anti-PD-L1	301
12	20791	02 - Mu IgG1 anti-PD-L1	401
15	20791	02 - Mu IgG1 anti-PD-L1	150
19	20791	02 - Mu IgG1 anti-PD-L1	150
22	20791	02 - Mu IgG1 anti-PD-L1	126
26	20791	02 - Mu IgG1 anti-PD-L1	146
29	20791	02 - Mu IgG1 anti-PD-L1	163
33	20791	02 - Mu IgG1 anti-PD-L1	149
36	20791	02 - Mu IgG1 anti-PD-L1	272
39	20791	02 - Mu IgG1 anti-PD-L1	377
-1	20832	02 - Mu IgG1 anti-PD-L1	188
2	20832	02 - Mu IgG1 anti-PD-L1	460
5	20832	02 - Mu IgG1 anti-PD-L1	486
8	20832	02 - Mu IgG1 anti-PD-L1	682
12	20832	02 - Mu IgG1 anti-PD-L1	892	pin ulceration
15	20832	02 - Mu IgG1 anti-PD-L1	1636	pin ulceration
19	20832	02 - Mu IgG1 anti-PD-L1	1683	pin ulceration
22	20832	02 - Mu IgG1 anti-PD-L1	2436	pin ulceration Mouse tumor volume is greater than 2000 mm3. Mouse euthanized.
-1	20884	02 - Mu IgG1 anti-PD-L1	160
2	20884	02 - Mu IgG1 anti-PD-L1	312
5	20884	02 - Mu IgG1 anti-PD-L1	219
8	20884	02 - Mu IgG1 anti-PD-L1	440
12	20884	02 - Mu IgG1 anti-PD-L1	463
15	20884	02 - Mu IgG1 anti-PD-L1	298
19	20884	02 - Mu IgG1 anti-PD-L1	161
22	20884	02 - Mu IgG1 anti-PD-L1	217
26	20884	02 - Mu IgG1 anti-PD-L1	156
29	20884	02 - Mu IgG1 anti-PD-L1	103
33	20884	02 - Mu IgG1 anti-PD-L1	90
36	20884	02 - Mu IgG1 anti-PD-L1	0	CR
39	20884	02 - Mu IgG1 anti-PD-L1	0	CR
-1	20899	02 - Mu IgG1 anti-PD-L1	169
2	20899	02 - Mu IgG1 anti-PD-L1	318
5	20899	02 - Mu IgG1 anti-PD-L1	375
8	20899	02 - Mu IgG1 anti-PD-L1	909
12	20899	02 - Mu IgG1 anti-PD-L1	959
15	20899	02 - Mu IgG1 anti-PD-L1	771
19	20899	02 - Mu IgG1 anti-PD-L1	1408
22	20899	02 - Mu IgG1 anti-PD-L1	1182
26	20899	02 - Mu IgG1 anti-PD-L1	1704
29	20899	02 - Mu IgG1 anti-PD-L1	2414	Mouse tumor volume is greater than 2000 mm3. Mouse euthanized.
-1	21338	02 - Mu IgG1 anti-PD-L1	176
2	21338	02 - Mu IgG1 anti-PD-L1	417
5	21338	02 - Mu IgG1 anti-PD-L1	356
8	21338	02 - Mu IgG1 anti-PD-L1	629
12	21338	02 - Mu IgG1 anti-PD-L1	910
15	21338	02 - Mu IgG1 anti-PD-L1	849
19	21338	02 - Mu IgG1 anti-PD-L1	1199
22	21338	02 - Mu IgG1 anti-PD-L1	1216
26	21338	02 - Mu IgG1 anti-PD-L1	1773
29	21338	02 - Mu IgG1 anti-PD-L1	2059	Mouse tumor volume is greater than 2000 mm3. Mouse euthanized.
-1	19525	03 - Mu IgG1 anti-TGFb	163
2	19525	03 - Mu IgG1 anti-TGFb	235
5	19525	03 - Mu IgG1 anti-TGFb	338
8	19525	03 - Mu IgG1 anti-TGFb	377
12	19525	03 - Mu IgG1 anti-TGFb	640
15	19525	03 - Mu IgG1 anti-TGFb	985
19	19525	03 - Mu IgG1 anti-TGFb	1111
22	19525	03 - Mu IgG1 anti-TGFb	1015
26	19525	03 - Mu IgG1 anti-TGFb	1474
29	19525	03 - Mu IgG1 anti-TGFb	960
33	19525	03 - Mu IgG1 anti-TGFb	1601
36	19525	03 - Mu IgG1 anti-TGFb	1999
-1	19926	03 - Mu IgG1 anti-TGFb	153
2	19926	03 - Mu IgG1 anti-TGFb	324
5	19926	03 - Mu IgG1 anti-TGFb	597
8	19926	03 - Mu IgG1 anti-TGFb	639
12	19926	03 - Mu IgG1 anti-TGFb	764
15	19926	03 - Mu IgG1 anti-TGFb	1036
19	19926	03 - Mu IgG1 anti-TGFb	1208
22	19926	03 - Mu IgG1 anti-TGFb	1642
26	19926	03 - Mu IgG1 anti-TGFb	1852
29	19926	03 - Mu IgG1 anti-TGFb	2434	Mouse tumor volume is greater than 2000 mm3. Mouse euthanized.
-1	20154	03 - Mu IgG1 anti-TGFb	194
2	20154	03 - Mu IgG1 anti-TGFb	348
5	20154	03 - Mu IgG1 anti-TGFb	506
8	20154	03 - Mu IgG1 anti-TGFb	735
12	20154	03 - Mu IgG1 anti-TGFb	1768
15	20154	03 - Mu IgG1 anti-TGFb	2105	Mouse tumor volume is greater than 2000 mm3. Mouse euthanized.
-1	20338	03 - Mu IgG1 anti-TGFb	155
2	20338	03 - Mu IgG1 anti-TGFb	281
5	20338	03 - Mu IgG1 anti-TGFb	350
8	20338	03 - Mu IgG1 anti-TGFb	588
12	20338	03 - Mu IgG1 anti-TGFb	987
15	20338	03 - Mu IgG1 anti-TGFb	1537
19	20338	03 - Mu IgG1 anti-TGFb	2444	Mouse tumor volume is greater than 2000 mm3. Mouse euthanized.
-1	20568	03 - Mu IgG1 anti-TGFb	144
2	20568	03 - Mu IgG1 anti-TGFb	371
5	20568	03 - Mu IgG1 anti-TGFb	420
8	20568	03 - Mu IgG1 anti-TGFb	764
12	20568	03 - Mu IgG1 anti-TGFb	1083
15	20568	03 - Mu IgG1 anti-TGFb	1555
19	20568	03 - Mu IgG1 anti-TGFb	2664	Mouse tumor volume is greater than 2000 mm3. Mouse euthanized.
-1	21453	03 - Mu IgG1 anti-TGFb	171
2	21453	03 - Mu IgG1 anti-TGFb	223
5	21453	03 - Mu IgG1 anti-TGFb	350
8	21453	03 - Mu IgG1 anti-TGFb	255
12	21453	03 - Mu IgG1 anti-TGFb	323
15	21453	03 - Mu IgG1 anti-TGFb	415
19	21453	03 - Mu IgG1 anti-TGFb	406
22	21453	03 - Mu IgG1 anti-TGFb	566
26	21453	03 - Mu IgG1 anti-TGFb	1026
29	21453	03 - Mu IgG1 anti-TGFb	1644
33	21453	03 - Mu IgG1 anti-TGFb	2192	Mouse tumor volume is greater than 2000 mm3. Mouse euthanized.
-1	21791	03 - Mu IgG1 anti-TGFb	177
2	21791	03 - Mu IgG1 anti-TGFb	321
5	21791	03 - Mu IgG1 anti-TGFb	388
8	21791	03 - Mu IgG1 anti-TGFb	574
12	21791	03 - Mu IgG1 anti-TGFb	983
15	21791	03 - Mu IgG1 anti-TGFb	833
19	21791	03 - Mu IgG1 anti-TGFb	1103
22	21791	03 - Mu IgG1 anti-TGFb	919
26	21791	03 - Mu IgG1 anti-TGFb	885
29	21791	03 - Mu IgG1 anti-TGFb	1200
33	21791	03 - Mu IgG1 anti-TGFb	1796
36	21791	03 - Mu IgG1 anti-TGFb	2386	Mouse tumor volume is greater than 2000 mm3. Mouse euthanized.
-1	22272	03 - Mu IgG1 anti-TGFb	193
2	22272	03 - Mu IgG1 anti-TGFb	380
5	22272	03 - Mu IgG1 anti-TGFb	397
8	22272	03 - Mu IgG1 anti-TGFb	444
12	22272	03 - Mu IgG1 anti-TGFb	516
15	22272	03 - Mu IgG1 anti-TGFb	400
19	22272	03 - Mu IgG1 anti-TGFb	607
22	22272	03 - Mu IgG1 anti-TGFb	392
26	22272	03 - Mu IgG1 anti-TGFb	621
29	22272	03 - Mu IgG1 anti-TGFb	671
33	22272	03 - Mu IgG1 anti-TGFb	562
36	22272	03 - Mu IgG1 anti-TGFb	702
39	22272	03 - Mu IgG1 anti-TGFb	895
-1	22402	03 - Mu IgG1 anti-TGFb	199
2	22402	03 - Mu IgG1 anti-TGFb	407
5	22402	03 - Mu IgG1 anti-TGFb	434
8	22402	03 - Mu IgG1 anti-TGFb	615
12	22402	03 - Mu IgG1 anti-TGFb	1260
15	22402	03 - Mu IgG1 anti-TGFb	1534
19	22402	03 - Mu IgG1 anti-TGFb	2101	Mouse tumor volume is greater than 2000 mm3. Mouse euthanized.
-1	22436	03 - Mu IgG1 anti-TGFb	139
2	22436	03 - Mu IgG1 anti-TGFb	285
5	22436	03 - Mu IgG1 anti-TGFb	357
8	22436	03 - Mu IgG1 anti-TGFb	864
12	22436	03 - Mu IgG1 anti-TGFb	2128	Mouse tumor volume is greater than 2000 mm3. Mouse euthanized.
-1	11538	04 - Mu IgG1 anti-PD-L1 + Mu IgG1 anti-TGFb	198
2	11538	04 - Mu IgG1 anti-PD-L1 + Mu IgG1 anti-TGFb	287
5	11538	04 - Mu IgG1 anti-PD-L1 + Mu IgG1 anti-TGFb	528
8	11538	04 - Mu IgG1 anti-PD-L1 + Mu IgG1 anti-TGFb	261
12	11538	04 - Mu IgG1 anti-PD-L1 + Mu IgG1 anti-TGFb	178
15	11538	04 - Mu IgG1 anti-PD-L1 + Mu IgG1 anti-TGFb	102
19	11538	04 - Mu IgG1 anti-PD-L1 + Mu IgG1 anti-TGFb	32	Tumor present but too small to be calipered accurately.
22	11538	04 - Mu IgG1 anti-PD-L1 + Mu IgG1 anti-TGFb	0	CR
26	11538	04 - Mu IgG1 anti-PD-L1 + Mu IgG1 anti-TGFb	0	CR
29	11538	04 - Mu IgG1 anti-PD-L1 + Mu IgG1 anti-TGFb	0	CR
33	11538	04 - Mu IgG1 anti-PD-L1 + Mu IgG1 anti-TGFb	0	CR
36	11538	04 - Mu IgG1 anti-PD-L1 + Mu IgG1 anti-TGFb	0	CR
39	11538	04 - Mu IgG1 anti-PD-L1 + Mu IgG1 anti-TGFb	0	CR
-1	19620	04 - Mu IgG1 anti-PD-L1 + Mu IgG1 anti-TGFb	135
2	19620	04 - Mu IgG1 anti-PD-L1 + Mu IgG1 anti-TGFb	326
5	19620	04 - Mu IgG1 anti-PD-L1 + Mu IgG1 anti-TGFb	397
8	19620	04 - Mu IgG1 anti-PD-L1 + Mu IgG1 anti-TGFb	323
12	19620	04 - Mu IgG1 anti-PD-L1 + Mu IgG1 anti-TGFb	322
15	19620	04 - Mu IgG1 anti-PD-L1 + Mu IgG1 anti-TGFb	114
19	19620	04 - Mu IgG1 anti-PD-L1 + Mu IgG1 anti-TGFb	32	Tumor present but too small to be calipered accurately.
22	19620	04 - Mu IgG1 anti-PD-L1 + Mu IgG1 anti-TGFb	0	CR
26	19620	04 - Mu IgG1 anti-PD-L1 + Mu IgG1 anti-TGFb	0	CR
29	19620	04 - Mu IgG1 anti-PD-L1 + Mu IgG1 anti-TGFb	0	CR
33	19620	04 - Mu IgG1 anti-PD-L1 + Mu IgG1 anti-TGFb	0	CR
36	19620	04 - Mu IgG1 anti-PD-L1 + Mu IgG1 anti-TGFb	0	CR
39	19620	04 - Mu IgG1 anti-PD-L1 + Mu IgG1 anti-TGFb	0	CR
-1	20423	04 - Mu IgG1 anti-PD-L1 + Mu IgG1 anti-TGFb	155
2	20423	04 - Mu IgG1 anti-PD-L1 + Mu IgG1 anti-TGFb	275
5	20423	04 - Mu IgG1 anti-PD-L1 + Mu IgG1 anti-TGFb	282
8	20423	04 - Mu IgG1 anti-PD-L1 + Mu IgG1 anti-TGFb	289
12	20423	04 - Mu IgG1 anti-PD-L1 + Mu IgG1 anti-TGFb	199
15	20423	04 - Mu IgG1 anti-PD-L1 + Mu IgG1 anti-TGFb	71
19	20423	04 - Mu IgG1 anti-PD-L1 + Mu IgG1 anti-TGFb	0	CR
22	20423	04 - Mu IgG1 anti-PD-L1 + Mu IgG1 anti-TGFb	0	CR
26	20423	04 - Mu IgG1 anti-PD-L1 + Mu IgG1 anti-TGFb	0	CR
29	20423	04 - Mu IgG1 anti-PD-L1 + Mu IgG1 anti-TGFb	0	CR
33	20423	04 - Mu IgG1 anti-PD-L1 + Mu IgG1 anti-TGFb	0	CR
36	20423	04 - Mu IgG1 anti-PD-L1 + Mu IgG1 anti-TGFb	0	CR
39	20423	04 - Mu IgG1 anti-PD-L1 + Mu IgG1 anti-TGFb	0	CR
-1	20510	04 - Mu IgG1 anti-PD-L1 + Mu IgG1 anti-TGFb	151
2	20510	04 - Mu IgG1 anti-PD-L1 + Mu IgG1 anti-TGFb	357
5	20510	04 - Mu IgG1 anti-PD-L1 + Mu IgG1 anti-TGFb	531
8	20510	04 - Mu IgG1 anti-PD-L1 + Mu IgG1 anti-TGFb	461
12	20510	04 - Mu IgG1 anti-PD-L1 + Mu IgG1 anti-TGFb	609
15	20510	04 - Mu IgG1 anti-PD-L1 + Mu IgG1 anti-TGFb	762
19	20510	04 - Mu IgG1 anti-PD-L1 + Mu IgG1 anti-TGFb	961
22	20510	04 - Mu IgG1 anti-PD-L1 + Mu IgG1 anti-TGFb	1144
26	20510	04 - Mu IgG1 anti-PD-L1 + Mu IgG1 anti-TGFb	1896
29	20510	04 - Mu IgG1 anti-PD-L1 + Mu IgG1 anti-TGFb	2295	Mouse tumor volume is greater than 2000 mm3. Mouse euthanized.
-1	21929	04 - Mu IgG1 anti-PD-L1 + Mu IgG1 anti-TGFb	194
2	21929	04 - Mu IgG1 anti-PD-L1 + Mu IgG1 anti-TGFb	295
5	21929	04 - Mu IgG1 anti-PD-L1 + Mu IgG1 anti-TGFb	266
8	21929	04 - Mu IgG1 anti-PD-L1 + Mu IgG1 anti-TGFb	295
12	21929	04 - Mu IgG1 anti-PD-L1 + Mu IgG1 anti-TGFb	186
15	21929	04 - Mu IgG1 anti-PD-L1 + Mu IgG1 anti-TGFb	32	Tumor present but too small to be calipered accurately.
19	21929	04 - Mu IgG1 anti-PD-L1 + Mu IgG1 anti-TGFb	0	CR
22	21929	04 - Mu IgG1 anti-PD-L1 + Mu IgG1 anti-TGFb	0	CR
26	21929	04 - Mu IgG1 anti-PD-L1 + Mu IgG1 anti-TGFb	0	CR
29	21929	04 - Mu IgG1 anti-PD-L1 + Mu IgG1 anti-TGFb	0	CR
33	21929	04 - Mu IgG1 anti-PD-L1 + Mu IgG1 anti-TGFb	0	CR
36	21929	04 - Mu IgG1 anti-PD-L1 + Mu IgG1 anti-TGFb	0	CR
39	21929	04 - Mu IgG1 anti-PD-L1 + Mu IgG1 anti-TGFb	0	CR
-1	22319	04 - Mu IgG1 anti-PD-L1 + Mu IgG1 anti-TGFb	170
2	22319	04 - Mu IgG1 anti-PD-L1 + Mu IgG1 anti-TGFb	281
5	22319	04 - Mu IgG1 anti-PD-L1 + Mu IgG1 anti-TGFb	297
8	22319	04 - Mu IgG1 anti-PD-L1 + Mu IgG1 anti-TGFb	255
12	22319	04 - Mu IgG1 anti-PD-L1 + Mu IgG1 anti-TGFb	150
15	22319	04 - Mu IgG1 anti-PD-L1 + Mu IgG1 anti-TGFb	97
19	22319	04 - Mu IgG1 anti-PD-L1 + Mu IgG1 anti-TGFb	96
22	22319	04 - Mu IgG1 anti-PD-L1 + Mu IgG1 anti-TGFb	32	Tumor present but too small to be calipered accurately.
26	22319	04 - Mu IgG1 anti-PD-L1 + Mu IgG1 anti-TGFb	0	CR
29	22319	04 - Mu IgG1 anti-PD-L1 + Mu IgG1 anti-TGFb	0	CR
33	22319	04 - Mu IgG1 anti-PD-L1 + Mu IgG1 anti-TGFb	0	CR
36	22319	04 - Mu IgG1 anti-PD-L1 + Mu IgG1 anti-TGFb	0	CR
39	22319	04 - Mu IgG1 anti-PD-L1 + Mu IgG1 anti-TGFb	0	CR
-1	22364	04 - Mu IgG1 anti-PD-L1 + Mu IgG1 anti-TGFb	192
2	22364	04 - Mu IgG1 anti-PD-L1 + Mu IgG1 anti-TGFb	303
5	22364	04 - Mu IgG1 anti-PD-L1 + Mu IgG1 anti-TGFb	334
8	22364	04 - Mu IgG1 anti-PD-L1 + Mu IgG1 anti-TGFb	321
12	22364	04 - Mu IgG1 anti-PD-L1 + Mu IgG1 anti-TGFb	203
15	22364	04 - Mu IgG1 anti-PD-L1 + Mu IgG1 anti-TGFb	112
19	22364	04 - Mu IgG1 anti-PD-L1 + Mu IgG1 anti-TGFb	0	CR
22	22364	04 - Mu IgG1 anti-PD-L1 + Mu IgG1 anti-TGFb	0	CR
26	22364	04 - Mu IgG1 anti-PD-L1 + Mu IgG1 anti-TGFb	0	CR
29	22364	04 - Mu IgG1 anti-PD-L1 + Mu IgG1 anti-TGFb	0	CR
33	22364	04 - Mu IgG1 anti-PD-L1 + Mu IgG1 anti-TGFb	0	CR
36	22364	04 - Mu IgG1 anti-PD-L1 + Mu IgG1 anti-TGFb	0	CR
39	22364	04 - Mu IgG1 anti-PD-L1 + Mu IgG1 anti-TGFb	0	CR
-1	22366	04 - Mu IgG1 anti-PD-L1 + Mu IgG1 anti-TGFb	163
2	22366	04 - Mu IgG1 anti-PD-L1 + Mu IgG1 anti-TGFb	344
5	22366	04 - Mu IgG1 anti-PD-L1 + Mu IgG1 anti-TGFb	552
8	22366	04 - Mu IgG1 anti-PD-L1 + Mu IgG1 anti-TGFb	471
12	22366	04 - Mu IgG1 anti-PD-L1 + Mu IgG1 anti-TGFb	438
15	22366	04 - Mu IgG1 anti-PD-L1 + Mu IgG1 anti-TGFb	200
19	22366	04 - Mu IgG1 anti-PD-L1 + Mu IgG1 anti-TGFb	165
22	22366	04 - Mu IgG1 anti-PD-L1 + Mu IgG1 anti-TGFb	74
26	22366	04 - Mu IgG1 anti-PD-L1 + Mu IgG1 anti-TGFb	0	CR
29	22366	04 - Mu IgG1 anti-PD-L1 + Mu IgG1 anti-TGFb	0	CR
33	22366	04 - Mu IgG1 anti-PD-L1 + Mu IgG1 anti-TGFb	0	CR
36	22366	04 - Mu IgG1 anti-PD-L1 + Mu IgG1 anti-TGFb	0	CR
39	22366	04 - Mu IgG1 anti-PD-L1 + Mu IgG1 anti-TGFb	0	CR
-1	22428	04 - Mu IgG1 anti-PD-L1 + Mu IgG1 anti-TGFb	143
2	22428	04 - Mu IgG1 anti-PD-L1 + Mu IgG1 anti-TGFb	419
5	22428	04 - Mu IgG1 anti-PD-L1 + Mu IgG1 anti-TGFb	634
8	22428	04 - Mu IgG1 anti-PD-L1 + Mu IgG1 anti-TGFb	568
12	22428	04 - Mu IgG1 anti-PD-L1 + Mu IgG1 anti-TGFb	450
15	22428	04 - Mu IgG1 anti-PD-L1 + Mu IgG1 anti-TGFb	314
19	22428	04 - Mu IgG1 anti-PD-L1 + Mu IgG1 anti-TGFb	166
22	22428	04 - Mu IgG1 anti-PD-L1 + Mu IgG1 anti-TGFb	143
26	22428	04 - Mu IgG1 anti-PD-L1 + Mu IgG1 anti-TGFb	0	CR
29	22428	04 - Mu IgG1 anti-PD-L1 + Mu IgG1 anti-TGFb	0	CR
33	22428	04 - Mu IgG1 anti-PD-L1 + Mu IgG1 anti-TGFb	0	CR
36	22428	04 - Mu IgG1 anti-PD-L1 + Mu IgG1 anti-TGFb	0	CR
39	22428	04 - Mu IgG1 anti-PD-L1 + Mu IgG1 anti-TGFb	0	CR
-1	22524	04 - Mu IgG1 anti-PD-L1 + Mu IgG1 anti-TGFb	177
2	22524	04 - Mu IgG1 anti-PD-L1 + Mu IgG1 anti-TGFb	286
5	22524	04 - Mu IgG1 anti-PD-L1 + Mu IgG1 anti-TGFb	220
8	22524	04 - Mu IgG1 anti-PD-L1 + Mu IgG1 anti-TGFb	274
12	22524	04 - Mu IgG1 anti-PD-L1 + Mu IgG1 anti-TGFb	250
15	22524	04 - Mu IgG1 anti-PD-L1 + Mu IgG1 anti-TGFb	147
19	22524	04 - Mu IgG1 anti-PD-L1 + Mu IgG1 anti-TGFb	32	Tumor present but too small to be calipered accurately.
22	22524	04 - Mu IgG1 anti-PD-L1 + Mu IgG1 anti-TGFb	0	CR
26	22524	04 - Mu IgG1 anti-PD-L1 + Mu IgG1 anti-TGFb	0	CR
29	22524	04 - Mu IgG1 anti-PD-L1 + Mu IgG1 anti-TGFb	0	CR
33	22524	04 - Mu IgG1 anti-PD-L1 + Mu IgG1 anti-TGFb	0	CR
36	22524	04 - Mu IgG1 anti-PD-L1 + Mu IgG1 anti-TGFb	0	CR
39	22524	04 - Mu IgG1 anti-PD-L1 + Mu IgG1 anti-TGFb	0	CR

## Sheet: Figure 1B
mouse ID	Days	ctr	aPD-L1	aTGFb	combo
18055	16	1
20021	20	1
21832	23	1
21880	13	1
21986	30	1
22125	34	1							1= euthanized
22153	13	1							0= alive
22384	16	1
22410	13	1
22425	13	1
17575	30		1
17868	40		0
18231	40		0
19529	16		1
19557	30		1
20791	40		0
20832	23		1
20884	40		0
20899	30		1
21338	30		1
19525	37			1
19926	30			1
20154	16			1
20338	20			1
20568	20			1
21453	34			1
21791	37			1
22272	40			0
22402	20			1
22436	13			1
11538	40				0
19620	40				0
20423	40				0
20510	30				1
21929	40				0
22319	40				0
22364	40				0
22366	40				0
22428	40				0
22524	40				0

## Sheet: Figure 1C
Study	treatment	CD8/mg	CD8/mg_FC	CD8+gzmB+/mg	CD8+gzmB+/mg_FC
1886 F	ctr	1810	0.613144	238.769	0.913015
1886 F	ctr	4100	1.38889	372.913	1.42596
1886 F	ctr	3160	1.07046	232.937	0.890714
1886 F	ctr	3870	1.31098	362.851	1.38748
1886 F	ctr	1820	0.616531	100.116	0.382828
1886 F	aPDL1	1180	0.399729	120.155	0.459454
1886 F	aPDL1	2000	0.677507	220.44	0.842927
1886 F	aPDL1	3260	1.10434	502.169	1.92021
1886 F	aPDL1	3550	1.20257	412.047	1.5756
1886 F	aPDL1	3880	1.31436	303.36	1.16
1886 F	aTGFb	2740	0.928184	323.658	1.23762
1886 F	aTGFb	1410	0.477642	206.436	0.789378
1886 F	aTGFb	1310	0.443767	191.087	0.730686
1886 F	aTGFb	2500	0.846883	277.576	1.06141
1886 F	aTGFb	1810	0.613144	158.524	0.60617
1886 F	combo	3350	1.13482	599.058	2.2907
1886 F	combo	3190	1.08062	653.181	2.49766
1886 F	combo	4110	1.39228	534.044	2.0421
1886 F	combo	4630	1.56843	703.356	2.68952
1886 F	combo	3010	1.01965	611.663	2.3389
1886 U	ctr	920	0.649626	107	0.570971
1886 U	ctr	905	0.639034	102	0.54429
1886 U	ctr	947	0.668691	115	0.613661
1886 U	ctr	2419	1.70809	339	1.80896
1886 U	ctr	1890	1.33456	274	1.46211
1886 U	aPDL1	3126	2.20732	438	2.33725
1886 U	aPDL1	1577	1.11354	191	1.01921
1886 U	aPDL1	1336	0.94337	280	1.49413
1886 U	aPDL1	1155	0.815563	147	0.784418
1886 U	aPDL1	1842	1.30066	265	1.41409
1886 U	combo	1317	0.929953	186	0.992529
1886 U	combo	5022	3.54611	874	4.66382
1886 U	combo	2807	1.98206	477	2.54536
1886 U	combo	5759	4.06652	1135	6.05656
1886 U	combo	1479	1.04434	423	2.2572

## Sheet: Figure 1D
Treatment	CD8_localization	Study_number
ctr	8.98	H2016_1430
ctr	12.96	H2016_1430
ctr	12.76	H2016_1430
ctr	12.38	H2016_1430
ctr	11.76	H2016_1430
ctr	19.37	H2016_1430
ctr	8.96	H2016_1430
ctr	13.85	H2016_1430
ctr	14.04	H2016_1430
ctr	6.62	H2015_1436
ctr	7.65	H2015_1436
ctr	16.48	H2015_1436
ctr	9.65	H2015_1436
ctr	10.76	H2015_1436
aPD-L1	11.61	H2016_1430
aPD-L1	28.84	H2016_1430
aPD-L1	16.68	H2016_1430
aPD-L1	10.81	H2016_1430
aPD-L1	16.32	H2016_1430
aPD-L1	9.51	H2016_1430
aPD-L1	10.1	H2016_1430
aPD-L1	13.06	H2016_1430
aPD-L1	23.72	H2016_1430
aPD-L1	10.14	H2016_1430
aPD-L1	9.75	H2015_1436
aPD-L1	12.81	H2015_1436
aPD-L1	19.27	H2015_1436
aPD-L1	11.15	H2015_1436
aPD-L1	12.64	H2015_1436
aTGFb	12.49	H2016_1430
aTGFb	14.67	H2016_1430
aTGFb	13.74	H2016_1430
aTGFb	14.37	H2016_1430
aTGFb	17.71	H2016_1430
aTGFb	6.2	H2016_1430
aTGFb	12.06	H2016_1430
aTGFb	17.77	H2016_1430
aTGFb	12.08	H2016_1430
aTGFb	12.52	H2015_1436
aTGFb	10.2	H2015_1436
aTGFb	14.48	H2015_1436
aTGFb	9.12	H2015_1436
combo	17.86	H2016_1430
combo	31.26	H2016_1430
combo	24.2	H2016_1430
combo	31.72	H2016_1430
combo	25.85	H2016_1430
combo	17.12	H2016_1430
combo	10.36	H2016_1430
combo	10.14	H2016_1430
combo	18.07	H2016_1430
combo	28.3	H2015_1436
combo	30.56	H2015_1436
combo	12.03	H2015_1436
combo	28.88	H2015_1436
combo	20.89	H2015_1436

## Sheet: Figure 3B
	sample	clusters	Freq	Condition
1	B0301Combo	0	0.146237	Combo
2	B0301Ctrl	0	0.28022	Ctrl
3	B0301PDL1	0	0.290476	PDL1
4	B0301Tgfb	0	0.185864	Tgfb
5	B0302Combo	0	0.168033	Combo
6	B0302Ctrl	0	0.358209	Ctrl
7	B0302PDL1	0	0.206166	PDL1
8	B0302Tgfb	0	0.300578	Tgfb
9	B0303Combo	0	0.0684292	Combo
10	B0303Ctrl	0	0.296296	Ctrl
11	B0303PDL1	0	0.170168	PDL1
12	B0303Tgfb	0	0.230366	Tgfb
13	B0304Combo	0	0.0797101	Combo
14	B0304Ctrl	0	0.246914	Ctrl
15	B0304PDL1	0	0.235294	PDL1
16	B0304Tgfb	0	0.326667	Tgfb
17	B0305Combo	0	0.164865	Combo
18	B0305Ctrl	0	0.271111	Ctrl
19	B0305PDL1	0	0.163706	PDL1
20	B0305Tgfb	0	0.191726	Tgfb
21	B0301Combo	1	0.166667	Combo
22	B0301Ctrl	1	0.148352	Ctrl
23	B0301PDL1	1	0.169048	PDL1
24	B0301Tgfb	1	0.180628	Tgfb
25	B0302Combo	1	0.288934	Combo
26	B0302Ctrl	1	0.0746269	Ctrl
27	B0302PDL1	1	0.337187	PDL1
28	B0302Tgfb	1	0.211946	Tgfb
29	B0303Combo	1	0.387247	Combo
30	B0303Ctrl	1	0.251852	Ctrl
31	B0303PDL1	1	0.151261	PDL1
32	B0303Tgfb	1	0.151832	Tgfb
33	B0304Combo	1	0.40942	Combo
34	B0304Ctrl	1	0.135802	Ctrl
35	B0304PDL1	1	0.0961538	PDL1
36	B0304Tgfb	1	0.116667	Tgfb
37	B0305Combo	1	0.183784	Combo
38	B0305Ctrl	1	0.106667	Ctrl
39	B0305PDL1	1	0.162437	PDL1
40	B0305Tgfb	1	0.0272452	Tgfb
41	B0301Combo	2	0.297849	Combo
42	B0301Ctrl	2	0.115385	Ctrl
43	B0301PDL1	2	0.0428571	PDL1
44	B0301Tgfb	2	0.170157	Tgfb
45	B0302Combo	2	0.0778689	Combo
46	B0302Ctrl	2	0.134328	Ctrl
47	B0302PDL1	2	0.0732177	PDL1
48	B0302Tgfb	2	0.105973	Tgfb
49	B0303Combo	2	0.088647	Combo
50	B0303Ctrl	2	0.125926	Ctrl
51	B0303PDL1	2	0.207983	PDL1
52	B0303Tgfb	2	0.167539	Tgfb
53	B0304Combo	2	0.0615942	Combo
54	B0304Ctrl	2	0.17284	Ctrl
55	B0304PDL1	2	0.236425	PDL1
56	B0304Tgfb	2	0.1	Tgfb
57	B0305Combo	2	0.194595	Combo
58	B0305Ctrl	2	0.222222	Ctrl
59	B0305PDL1	2	0.189086	PDL1
60	B0305Tgfb	2	0.403633	Tgfb
61	B0301Combo	3	0.119355	Combo
62	B0301Ctrl	3	0.104396	Ctrl
63	B0301PDL1	3	0.109524	PDL1
64	B0301Tgfb	3	0.193717	Tgfb
65	B0302Combo	3	0.120902	Combo
66	B0302Ctrl	3	0.0149254	Ctrl
67	B0302PDL1	3	0.088632	PDL1
68	B0302Tgfb	3	0.0655106	Tgfb
69	B0303Combo	3	0.217729	Combo
70	B0303Ctrl	3	0.103704	Ctrl
71	B0303PDL1	3	0.186975	PDL1
72	B0303Tgfb	3	0.141361	Tgfb
73	B0304Combo	3	0.0996377	Combo
74	B0304Ctrl	3	0.111111	Ctrl
75	B0304PDL1	3	0.0837104	PDL1
76	B0304Tgfb	3	0.09	Tgfb
77	B0305Combo	3	0.121622	Combo
78	B0305Ctrl	3	0.12	Ctrl
79	B0305PDL1	3	0.147208	PDL1
80	B0305Tgfb	3	0.0696266	Tgfb
81	B0301Combo	4	0.0967742	Combo
82	B0301Ctrl	4	0.0934066	Ctrl
83	B0301PDL1	4	0.119048	PDL1
84	B0301Tgfb	4	0.078534	Tgfb
85	B0302Combo	4	0.127049	Combo
86	B0302Ctrl	4	0.19403	Ctrl
87	B0302PDL1	4	0.0924855	PDL1
88	B0302Tgfb	4	0.115607	Tgfb
89	B0303Combo	4	0.0575428	Combo
90	B0303Ctrl	4	0.0592593	Ctrl
91	B0303PDL1	4	0.0966387	PDL1
92	B0303Tgfb	4	0.116928	Tgfb
93	B0304Combo	4	0.0869565	Combo
94	B0304Ctrl	4	0.111111	Ctrl
95	B0304PDL1	4	0.164027	PDL1
96	B0304Tgfb	4	0.163333	Tgfb
97	B0305Combo	4	0.135135	Combo
98	B0305Ctrl	4	0.111111	Ctrl
99	B0305PDL1	4	0.111675	PDL1
100	B0305Tgfb	4	0.148335	Tgfb
101	B0301Combo	5	0.103226	Combo
102	B0301Ctrl	5	0.0714286	Ctrl
103	B0301PDL1	5	0.180952	PDL1
104	B0301Tgfb	5	0.0811518	Tgfb
105	B0302Combo	5	0.104508	Combo
106	B0302Ctrl	5	0.0597015	Ctrl
107	B0302PDL1	5	0.104046	PDL1
108	B0302Tgfb	5	0.105973	Tgfb
109	B0303Combo	5	0.0715397	Combo
110	B0303Ctrl	5	0.0592593	Ctrl
111	B0303PDL1	5	0.119748	PDL1
112	B0303Tgfb	5	0.120419	Tgfb
113	B0304Combo	5	0.0833333	Combo
114	B0304Ctrl	5	0.0617284	Ctrl
115	B0304PDL1	5	0.131222	PDL1
116	B0304Tgfb	5	0.14	Tgfb
117	B0305Combo	5	0.121622	Combo
118	B0305Ctrl	5	0.0622222	Ctrl
119	B0305PDL1	5	0.148477	PDL1
120	B0305Tgfb	5	0.130172	Tgfb
121	B0301Combo	6	0.0505376	Combo
122	B0301Ctrl	6	0.0659341	Ctrl
123	B0301PDL1	6	0.052381	PDL1
124	B0301Tgfb	6	0.0575916	Tgfb
125	B0302Combo	6	0.0655738	Combo
126	B0302Ctrl	6	0.104478	Ctrl
127	B0302PDL1	6	0.0423892	PDL1
128	B0302Tgfb	6	0.0558767	Tgfb
129	B0303Combo	6	0.0653188	Combo
130	B0303Ctrl	6	0.0666667	Ctrl
131	B0303PDL1	6	0.0252101	PDL1
132	B0303Tgfb	6	0.0418848	Tgfb
133	B0304Combo	6	0.0960145	Combo
134	B0304Ctrl	6	0.0617284	Ctrl
135	B0304PDL1	6	0.0260181	PDL1
136	B0304Tgfb	6	0.0266667	Tgfb
137	B0305Combo	6	0.0432432	Combo
138	B0305Ctrl	6	0.0622222	Ctrl
139	B0305PDL1	6	0.0507614	PDL1
140	B0305Tgfb	6	0.0181635	Tgfb
141	B0301Combo	7	0.0193548	Combo
142	B0301Ctrl	7	0.120879	Ctrl
143	B0301PDL1	7	0.0357143	PDL1
144	B0301Tgfb	7	0.052356	Tgfb
145	B0302Combo	7	0.0471311	Combo
146	B0302Ctrl	7	0.0597015	Ctrl
147	B0302PDL1	7	0.0558767	PDL1
148	B0302Tgfb	7	0.0385356	Tgfb
149	B0303Combo	7	0.0435459	Combo
150	B0303Ctrl	7	0.037037	Ctrl
151	B0303PDL1	7	0.0420168	PDL1
152	B0303Tgfb	7	0.0296684	Tgfb
153	B0304Combo	7	0.0833333	Combo
154	B0304Ctrl	7	0.0987654	Ctrl
155	B0304PDL1	7	0.0271493	PDL1
156	B0304Tgfb	7	0.0366667	Tgfb
157	B0305Combo	7	0.0351351	Combo
158	B0305Ctrl	7	0.0444444	Ctrl
159	B0305PDL1	7	0.0266497	PDL1
160	B0305Tgfb	7	0.0110999	Tgfb
C0
Comparison Z P.unadj P.adj
1 Combo - Ctrl -3.3140394 0.0009195855 0.005517513
2 Combo - Pd1 -1.7104719 0.0871786364 0.174357273
3 Ctrl - Pd1 1.6035675 0.1088094300 0.163214145
4 Combo - Tgfb -2.5657079 0.0102965490 0.030889647
5 Ctrl - Tgfb 0.7483315 0.4542602426 0.454260243
6 Pd1 - Tgfb -0.8552360 0.3924205245 0.470904629
C1
Comparison Z P.unadj P.adj
1 Combo - Ctrl 2.458803 0.01394009 0.08364055
2 Combo - Pd1 1.603567 0.10880943 0.21761886
3 Ctrl - Pd1 -0.855236 0.39242052 0.58863079
4 Combo - Tgfb 2.031185 0.04223619 0.12670856
5 Ctrl - Tgfb -0.427618 0.66892927 0.66892927
6 Pd1 - Tgfb 0.427618 0.66892927 0.80271512

## Sheet: Figure 3D
study	group	TPEX_cells_mg_FC	TSCL_cells_mg_FC
16-1886 U	a-ctrl	0.671702	0.704619
16-1886 U	a-ctrl	0.540004	0.3004
16-1886 U	a-ctrl	1.05207	0.595504
16-1886 U	a-ctrl	1.62976	1.70686
16-1886 U	a-ctrl	1.10646	1.69262
16-1886 U	b-PD-L1	1.08552	1.91604
16-1886 U	b-PD-L1	0.93167	1.2957
16-1886 U	b-PD-L1	0.667736	0.832708
16-1886 U	b-PD-L1	0.76145	0.687444
16-1886 U	b-PD-L1	0.688576	1.20386
16-1886 U	d-combo	0.589416	0.997306
16-1886 U	d-combo	0.752005	4.98097
16-1886 U	d-combo	0.457818	2.58832
16-1886 U	d-combo	0.579298	5.95895
16-1886 U	d-combo	0.288506	1.33833
20-0113 AB	a-ctrl	1.17617	0.819532
20-0113 AB	a-ctrl	1.39372	2.92022
20-0113 AB	a-ctrl	0.984534	0.581783
20-0113 AB	a-ctrl	1.09442	0.694269
20-0113 AB	a-ctrl	0.730512	0.614393
20-0113 AB	a-ctrl	0.398589	0.350469
20-0113 AB	a-ctrl	1.59579	1.18864
20-0113 AB	a-ctrl	0.988526	1.36517
20-0113 AB	a-ctrl	0.637744	0.46553
20-0113 AB	b-PD-L1	0.888279	0.822983
20-0113 AB	b-PD-L1	0.977337	2.14026
20-0113 AB	b-PD-L1	0.691957	0.966284
20-0113 AB	b-PD-L1	0.971707	0.840664
20-0113 AB	b-PD-L1	0.59046	0.59863
20-0113 AB	b-PD-L1	1.52286	2.92536
20-0113 AB	b-PD-L1	0.967038	1.64711
20-0113 AB	b-PD-L1	0.546358	0.736285
20-0113 AB	b-PD-L1	0.952378	0.920119
20-0113 AB	b-PD-L1	1.47971	1.92023
20-0113 AB	c-aTGFB	1.01807	0.902403
20-0113 AB	c-aTGFB	0.552641	1.86188
20-0113 AB	c-aTGFB	0.709482	1.13937
20-0113 AB	c-aTGFB	0.217626	0.218431
20-0113 AB	c-aTGFB	1.35767	0.977094
20-0113 AB	c-aTGFB	0.861527	0.669456
20-0113 AB	c-aTGFB	1.0057	1.11303
20-0113 AB	c-aTGFB	0.828959	1.40472
20-0113 AB	c-aTGFB	0.210401	0.307171
20-0113 AB	d-combo	1.38035	1.52091
20-0113 AB	d-combo	0.695179	1.85152
20-0113 AB	d-combo	0.257301	1.28059
20-0113 AB	d-combo	0.676332	2.89779
20-0113 AB	d-combo	1.70745	3.38522
20-0113 AB	d-combo	0.435052	0.381086
20-0113 AB	d-combo	0.699406	1.61223
20-0113 Y	a-ctrl	0.844689	0.87734
20-0113 Y	a-ctrl	0.829973	0.746542
20-0113 Y	a-ctrl	1.90685	2.10558
20-0113 Y	a-ctrl	1.21566	1.11507
20-0113 Y	a-ctrl	0.202827	0.155469
20-0113 Y	b-PD-L1	2.28347	3.77049
20-0113 Y	b-PD-L1	1.27837	3.20302
20-0113 Y	b-PD-L1	0.675919	3.92637
20-0113 Y	b-PD-L1	1.04192	1.1834
20-0113 Y	b-PD-L1	1.14979	0.561465
20-0113 Y	c-aTGFB	2.984	1.20647
20-0113 Y	c-aTGFB	0.871792	0.984459
20-0113 Y	c-aTGFB	0.859937	0.877097
20-0113 Y	c-aTGFB	1.67965	0.754378
20-0113 Y	c-aTGFB	0.918187	0.713675
20-0113 Y	d-combo	1.24831	2.52355
20-0113 Y	d-combo	1.66307	5.24553
20-0113 Y	d-combo	1.99634	1.78451
20-0113 Y	d-combo	0.886825	1.92385
20-0113 Y	d-combo	1.05246	2.50535

## Sheet: Figure 3G
Study	group	EDU+TSCL ncell/mg_FC
20-0113 AB	a-ctrl	0.973139
20-0113 AB	a-ctrl	2.69066
20-0113 AB	a-ctrl	0.757565
20-0113 AB	a-ctrl	0.646787
20-0113 AB	a-ctrl	0.728448
20-0113 AB	a-ctrl	0.3836
20-0113 AB	a-ctrl	0.808364
20-0113 AB	a-ctrl	1.59157
20-0113 AB	a-ctrl	0.419865
20-0113 AB	b-PD-L1	1.01762
20-0113 AB	b-PD-L1	1.88007
20-0113 AB	b-PD-L1	1.04546
20-0113 AB	b-PD-L1	0.661938
20-0113 AB	b-PD-L1	0.498307
20-0113 AB	b-PD-L1	2.5863
20-0113 AB	b-PD-L1	2.17173
20-0113 AB	b-PD-L1	0.524722
20-0113 AB	b-PD-L1	1.39055
20-0113 AB	b-PD-L1	1.95885
20-0113 AB	c-TGFb	0.975906
20-0113 AB	c-TGFb	1.79381
20-0113 AB	c-TGFb	1.33839
20-0113 AB	c-TGFb	0.225975
20-0113 AB	c-TGFb	1.09167
20-0113 AB	c-TGFb	0.689818
20-0113 AB	c-TGFb	1.20789
20-0113 AB	c-TGFb	1.69017
20-0113 AB	c-TGFb	0.372695
20-0113 AB	d-combo	1.35756
20-0113 AB	d-combo	1.6789
20-0113 AB	d-combo	1.91598
20-0113 AB	d-combo	3.72246
20-0113 AB	d-combo	3.13936
20-0113 AB	d-combo	0.301281
20-0113 AB	d-combo	2.28425
20-0113 Y	a-ctrl	0.685012
20-0113 Y	a-ctrl	0.787039
20-0113 Y	a-ctrl	2.13549
20-0113 Y	a-ctrl	1.23338
20-0113 Y	a-ctrl	0.159075
20-0113 Y	b-PD-L1	2.94264
20-0113 Y	b-PD-L1	3.28585
20-0113 Y	b-PD-L1	2.72736
20-0113 Y	b-PD-L1	0.967811
20-0113 Y	b-PD-L1	0.571225
20-0113 Y	c-TGFb	1.02003
20-0113 Y	c-TGFb	0.828801
20-0113 Y	c-TGFb	0.764866
20-0113 Y	c-TGFb	0.592175
20-0113 Y	c-TGFb	0.728616
20-0113 Y	d-combo	3.00067
20-0113 Y	d-combo	4.48586
20-0113 Y	d-combo	2.74599
20-0113 Y	d-combo	1.92234
20-0113 Y	d-combo	2.87388

## Sheet: Figure 3H
Day	aPD-L1		aPD-L1+FTY720		combo		combo+FTY720		Ctrl		Ctrl+FTY720
0	189.28	162.698	191.532	175.982	198.729	166.626	192.835	167.228	194.909	177.813	198.329	164.173
1	223.548	181.318	220.568	198.526	236.494	185.806	230.806	187.93	224.697	199.534	241.544	189.949
2	261.027	201.477	252.038	223.57	274.502	206.681	271.078	210.765	258.752	223.909	293.221	219.772
3	299.621	222.57	284.654	250.899	306.914	228.764	309.474	235.415	297.476	251.261	354.223	254.277
4	336.167	243.719	316.525	280.103	326.451	251.331	340.197	261.347	341.242	281.954	425.143	294.2
5	367.078	263.767	345.545	310.537	327.775	273.398	358.472	287.783	390.418	316.396	506.235	340.391
6	390.585	281.312	370.856	341.298	314.123	293.739	367.651	313.685	445.537	355.046	597.655	393.834
7	406.029	294.953	392.252	371.342	291.907	310.929	374.506	337.832	507.233	398.417	699.263	455.668
8	413.445	303.952	409.862	399.985	267.217	323.441	386.644	359.096	576.214	447.086	810.461	527.21
9	413.211	307.943	424.06	426.682	243.811	329.804	410.224	376.385	653.252	501.7	930.418	609.984
10	405.195	306.776	435.253	451.007	220.737	328.934	442.167	388.765	739.089	562.986	1059.26	705.755
11	389.477	300.424	443.954	472.899	196.619	320.701	475.607	395.875	834.477	631.758	1197.78	816.562
12	366.503	289.089	450.436	492.508	170.748	305.594	500.819	397.686	940.116	708.931	1347.37	944.766
13	336.786	273.235	453.609	510.12	142.927	284.549	503.827	394.393	1056.33	795.531	1510.41	1093.1
14	301.571	253.476	452.027	526.133	114.294	258.844	473.985	386.328	1183.13	892.71	1690.14	1264.72
15	263.325	230.357	444.238	541.025	87.6031	229.938	415.305	373.703	1320.25	1001.76	1889.92	1463.29
16	224.805	204.694	429.514	555.338	64.9358	199.381	340.608	356.65	1467.22	1124.13	2113.51	1693.03
17	189.056	177.705	409.223	569.685	47.4568	168.746	267.775	335.51	1623.93	1261.45	2364.05	1958.85
18	157.992	151.225	385.226	584.756	34.9517	139.616	207.634	311.006	1790.37	1415.54
19	132.358	126.823	359.609	601.297	26.4421	113.231	162.975	284.143	1966.69	1588.46
20	112.17	105.8	335.436	620.059	20.7147	90.5323	131.559	256.386	2154.04	1782.5
21	97.0448	88.7149	315.35	641.868	16.8929	71.8213	110.68	229.044
22	86.3683	75.4718	301.042	667.595	14.3813	56.9106	97.9193	203.146
23	79.2036	65.4826	292.675	697.905	12.6922	45.3743	90.3533	179.567
24	74.8542	58.1899	290.299	733.503	11.5032	36.6746	85.8706	158.837
25	72.9193	53.0872	294.3	775.146	10.6061	30.2481	83.0077	141.114
26	73.1594	49.4818	305.14	823.356	9.87224	25.5251	80.7121	126.156
27	75.2382	46.8079	322.292	878.633	9.27162	22.0754	78.517	113.655
28	78.8602	44.6461	345.001	941.505	8.79624	19.5833	76.1156	103.279
29	83.7848	42.6869	372.655	1012.4	8.43797	17.7741	73.3143	94.551
30	89.8443	40.6794	405.563	1091.69	8.18234	16.4484	70.2405	87.0577
31	96.8478	38.4682	444.365	1179.74	8.01659	15.468	67.0794	80.4848
32	104.524	36.123	489.798	1276.98	8.01659	14.7354	63.99	74.6024
33	112.573	33.7502	542.855	1383.85	8.01659	14.1765	61.1012	69.2329
34	120.928	31.4371	605.416	1500.7	8.01659	13.7318	58.5058	64.2362
35	129.594	29.2432			8.01659	13.3547	56.2771	59.5231
36	138.6	27.1828			8.01659	13.0202	54.4803	55.0962
37	148.058	25.2586			8.01659	12.7098	53.185	50.971

## Sheet: Figure 4C
Study	group	E22 pos Freq. of non naïve_FC
20-0113 AB	a-ctrl	1.37972
20-0113 AB	a-ctrl	0.598585
20-0113 AB	a-ctrl	1.46038
20-0113 AB	a-ctrl	0.908491
20-0113 AB	a-ctrl	0.861792
20-0113 AB	a-ctrl	0.904245
20-0113 AB	a-ctrl	0.534906
20-0113 AB	a-ctrl	1.76604
20-0113 AB	a-ctrl	0.585849
20-0113 AB	b-PD-L1	1.69387
20-0113 AB	b-PD-L1	0.823585
20-0113 AB	b-PD-L1	0.641038
20-0113 AB	b-PD-L1	1.02311
20-0113 AB	b-PD-L1	1.12075
20-0113 AB	b-PD-L1	1.52406
20-0113 AB	b-PD-L1	0.738679
20-0113 AB	b-PD-L1	1.26509
20-0113 AB	b-PD-L1	0.708962
20-0113 AB	b-PD-L1	1.09104
20-0113 AB	c-TGFb	1.15472
20-0113 AB	c-TGFb	0.713208
20-0113 AB	c-TGFb	0.577358
20-0113 AB	c-TGFb	0.815094
20-0113 AB	c-TGFb	0.590094
20-0113 AB	c-TGFb	0.615566
20-0113 AB	c-TGFb	0.925472
20-0113 AB	c-TGFb	0.53066
20-0113 AB	c-TGFb	1.35
20-0113 AB	d-combo	0.666509
20-0113 AB	d-combo	0.789623
20-0113 AB	d-combo	1.72358
20-0113 AB	d-combo	1.37972
20-0113 AB	d-combo	0.615566
20-0113 AB	d-combo	1.48585
20-0113 AB	d-combo	0.874528
20-0113 Y	a-ctrl	0.950951
20-0113 Y	a-ctrl	0.992659
20-0113 Y	a-ctrl	1.34301
20-0113 Y	a-ctrl	0.428762
20-0113 Y	a-ctrl	1.28462
20-0113 Y	b-PD-L1	1.9019
20-0113 Y	b-PD-L1	1.96864
20-0113 Y	b-PD-L1	0.942609
20-0113 Y	b-PD-L1	1.26793
20-0113 Y	b-PD-L1	1.78512
20-0113 Y	c-TGFb	0.533033
20-0113 Y	c-TGFb	0.491325
20-0113 Y	c-TGFb	2.13547
20-0113 Y	c-TGFb	0.967634
20-0113 Y	c-TGFb	1.26793
20-0113 Y	d-combo	0.867534
20-0113 Y	d-combo	1.10944
20-0113 Y	d-combo	0.810811
20-0113 Y	d-combo	1.43477
20-0113 Y	d-combo	0.355355

## Sheet: Figure 4G
Label	Experiment	Clonal Diversity
Ctrl Unk.	Unsorted	18.9334
Ctrl Unk.	Unsorted	41.6232
aTGFb Unk.	Unsorted	30.0798
Ctrl Unk.	Unsorted	31.8272
aPD-L1 Unk.	Unsorted	23.1
Combo Unk.	Unsorted	37.357
aPD-L1 Unk.	Unsorted	23.0529
Combo Unk.	Unsorted	48.6222
aPD-L1 Unk.	Unsorted	19.9401
Combo Unk.	Unsorted	38.3141
Ctrl E22	Antigen-Specific	10.1345
Ctrl E22	Antigen-Specific	5.12409
Ctrl E22	Antigen-Specific	5.80897
Ctrl E22	Antigen-Specific	8.93173
aPD-L1 E22	Antigen-Specific	3.73984
aPD-L1 E22	Antigen-Specific	9.54346
aPD-L1 E22	Antigen-Specific	5.42537
aPD-L1 E22	Antigen-Specific	10.1429
aTGFb E22	Antigen-Specific	9.0169
aTGFb E22	Antigen-Specific	9.3859
Combo E22	Antigen-Specific	2.17554
Combo E22	Antigen-Specific	7.47667
Combo E22	Antigen-Specific	10.7636

[truncated: 21 more sheets: Figure 6A, Figure 6C, Figure 6D, Figure 6E, Figure 6F, Figure 6G, Figure 6H, Figure S1A, Figure S1B, Figure S4B, Figure S4D, Figure S4G, Figure S4H, Figure S4I 20-0089 R, Figure S4I 17-0930 B, Figure S5F, Figure S5G, Figure S7E, Figure S7G, Figure S7H …]
